# Supplementary material for: The genome of the colonial hydroid Hydractinia reveals that their stem cells use a toolkit of evolutionarily shared genes with all animals
Source: Genome Res. 2024 Mar;34(3):498–513. doi: 10.1101/gr.278382.123 (PMC11067881; doi:10.1101/gr.278382.123)
Supplement: Supplement 1 [file Supplemental_Table_S9.xlsx]

## Sheet: hsym_combined_annotations
gene_id	best_BLAST_hit	eval	pannzer_description	pannzer_gene_name	molecular_function	biological_processes	cellular_component
Hsym|HyS0001.1	RMX49996.1 hypothetical protein pdam_00016666 [Pocillopora damicornis]	6e-10	NA	NA	NA	NA	NA
Hsym|HyS0001.3	XP_002154269.2 PREDICTED: protein SPT2 homolog [Hydra vulgaris]	1.3e-11	NA	NA	NA	NA	NA
Hsym|HyS0001.4	XP_002154269.2 PREDICTED: protein SPT2 homolog [Hydra vulgaris]	2.4e-12	NA	NA	NA	NA	NA
Hsym|HyS0001.6	XP_002591467.1 hypothetical protein BRAFLDRAFT_105240 [Branchiostoma floridae]	3.9e-11	NA	NA	NA	NA	NA
Hsym|HyS0001.7	XP_022289926.1 uncharacterized protein LOC111101643 isoform X1 [Crassostrea virginica]	2.5e-37	NA	NA	NA	NA	NA
Hsym|HyS0001.9	XP_002162876.2 PREDICTED: uncharacterized protein LOC100213942 [Hydra vulgaris]	6.3e-181	Palmitoyltransferase	ZDHHC17	protein-cysteine S-palmitoyltransferase activity	magnesium ion transmembrane transport	integral component of membrane
Hsym|HyS0001.10	KXJ21442.1 Transposon Ty3-I Gag-Pol polyprotein [Exaiptasia pallida]	9.3e-09	NA	NA	NA	NA	NA
Hsym|HyS0001.11	PFX24545.1 hypothetical protein AWC38_SpisGene10853 [Stylophora pistillata]	5.4e-58	ZAD domain-containing protein	NA	zinc ion binding	NA	nucleus
Hsym|HyS0001.12	KXJ19670.1 AT-hook-containing transcription factor [Exaiptasia pallida]	1.7e-11	NA	NA	NA	NA	NA
Hsym|HyS0001.13	KXJ04647.1 hypothetical protein AC249_AIPGENE3338, partial [Exaiptasia pallida]	9.5e-13	NA	NA	NA	NA	NA
Hsym|HyS0001.14	XP_001620875.1 hypothetical protein NEMVEDRAFT_v1g222621 [Nematostella vectensis]	1.5e-14	NA	NA	NA	NA	NA
Hsym|HyS0001.16	XP_028404838.1 uncharacterized protein LOC114527411 [Dendronephthya gigantea]	0.00018	NA	NA	NA	NA	NA
Hsym|HyS0001.17	XP_012558214.1 PREDICTED: uncharacterized protein LOC100208347 isoform X1 [Hydra vulgaris]	1e-34	NA	NA	NA	NA	NA
Hsym|HyS0001.21	XP_022800754.1 uncharacterized protein LOC111338505 [Stylophora pistillata]	1.8e-19	NA	NA	NA	NA	NA
Hsym|HyS0001.23	XP_028410643.1 uncharacterized protein LOC114533334 [Dendronephthya gigantea]	4.2e-30	Histone-lysine N-methyltransferase	NA	histone-lysine N-methyltransferase activity	histone lysine methylation	nucleus
Hsym|HyS0001.25	XP_009302434.2 SET domain-containing protein 5-like [Danio rerio]	1.9e-06	NA	NA	NA	NA	NA
Hsym|HyS0001.26	PFX15781.1 Ankyrin-2 [Stylophora pistillata]	1e-06	NA	NA	NA	NA	NA
Hsym|HyS0001.27	XP_002161908.1 PREDICTED: eukaryotic translation initiation factor 3 subunit G-like [Hydra vulgaris]	1.2e-128	Eukaryotic translation initiation factor 3 subunit G	EIF3G	translation initiation factor activity	formation of cytoplasmic translation initiation complex	eukaryotic translation initiation factor 3 complex
Hsym|HyS0001.28	RMX51863.1 hypothetical protein pdam_00018466 [Pocillopora damicornis]	2.8e-10	NA	NA	NA	NA	NA
Hsym|HyS0001.29	XP_028413990.1 uncharacterized protein LOC114536852 [Dendronephthya gigantea]	1.1e-44	Reverse transcriptase domain-containing protein	NA	NA	NA	NA
Hsym|HyS0001.30	XP_012559915.1 PREDICTED: uncharacterized protein LOC100210597 [Hydra vulgaris]	9.9e-135	Carbohydrate-binding module family 1 protein	NA	chitin binding	chitin metabolic process	mucus layer
Hsym|HyS0001.31	XP_012559733.1 PREDICTED: valine--tRNA ligase-like [Hydra vulgaris]	0	Valyl-tRNA synthetase	VARS	valine-tRNA ligase activity	valyl-tRNA aminoacylation	cytoplasm
Hsym|HyS0001.33	XP_002164730.1 PREDICTED: ubiquitin carboxyl-terminal hydrolase isozyme L5-like [Hydra vulgaris]	9.3e-128	Ubiquitin carboxyl-terminal hydrolase	UCHL5	thiol-dependent ubiquitin-specific protease activity	protein deubiquitination	Ino80 complex
Hsym|HyS0001.34	XP_012566909.1 PREDICTED: coiled-coil domain-containing protein 18-like [Hydra vulgaris]	1e-18	NA	NA	NA	NA	NA
Hsym|HyS0001.35	XP_028408437.1 casein kinase II subunit beta [Dendronephthya gigantea]	6.2e-112	Casein kinase II subunit beta	NA	protein kinase regulator activity	regulation of protein kinase activity	protein kinase CK2 complex
Hsym|HyS0001.36	XP_022785002.1 protein CASC1-like [Stylophora pistillata]	3.9e-113	Cancer susceptibility candidate 1	NA	NA	NA	NA
Hsym|HyS0001.37	PFX14367.1 hypothetical protein AWC38_SpisGene21476 [Stylophora pistillata]	2e-31	DDE Tnp4 domain-containing protein	NA	DNA-directed DNA polymerase activity	DNA biosynthetic process	integral component of membrane
Hsym|HyS0001.38	AFR54107.1 synaptonemal complex protein 3 [Hydra vulgaris]	2.2e-59	N-acetylglucosamine-1-phosphotransferase subunits alpha/beta	SYCP3	calcium ion binding	spermatid development	synaptonemal complex
Hsym|HyS0001.39	XP_012566911.1 PREDICTED: protein kinase C and casein kinase substrate in neurons protein 1-like [Hydra vulgaris]	2e-110	Kinase C and casein kinase substrate in neurons protein 2	NA	kinase activity	plasma membrane tubulation	cytoskeleton
Hsym|HyS0001.40	XP_012563510.1 PREDICTED: carboxyl-terminal PDZ ligand of neuronal nitric oxide synthase protein-like [Hydra vulgaris]	1.3e-109	Carboxyl-terminal PDZ ligand of neuronal nitric oxide synthase protein isoform 3	NA	nitric-oxide synthase binding	regulation of heart rate by chemical signal	T-tubule
Hsym|HyS0001.41	XP_012561233.1 PREDICTED: protein TSSC4-like [Hydra vulgaris]	6.1e-20	NA	NA	NA	NA	NA
Hsym|HyS0001.42	WP_128391398.1 ankyrin repeat domain-containing protein [Flavobacterium sp. 1E403]	2.1e-05	NA	NA	NA	NA	NA
Hsym|HyS0001.44	XP_004210587.2 PREDICTED: serine/threonine kinase SAD-1-like isoform X1 [Hydra vulgaris]	3.8e-170	BR serine/threonine-protein kinase 2	NA	protein kinase activity	protein phosphorylation	nucleus
Hsym|HyS0001.45	XP_028408491.1 uncharacterized protein LOC114531047 [Dendronephthya gigantea]	8.6e-66	NA	NA	NA	NA	NA
Hsym|HyS0001.46	XP_015776598.1 PREDICTED: uncharacterized protein LOC107354628 [Acropora digitifera]	5.1e-13	NA	NA	NA	NA	NA
Hsym|HyS0001.50	XP_012563851.1 PREDICTED: acid-sensing ion channel 4-like isoform X1 [Hydra vulgaris]	1e-44	NA	NA	NA	NA	NA
Hsym|HyS0001.54	XP_002159553.1 PREDICTED: pyroglutamylated RFamide peptide receptor-like [Hydra vulgaris]	6.6e-79	NA	NA	NA	NA	NA
Hsym|HyS0001.56	XP_004206530.1 PREDICTED: folliculin-like [Hydra vulgaris]	1.4e-178	Folliculin	FLCN	guanyl-nucleotide exchange factor activity	negative regulation of ATP biosynthetic process	cell-cell contact zone
Hsym|HyS0001.57	XP_012560121.1 PREDICTED: lysosomal alpha-glucosidase-like [Hydra vulgaris]	0	Lysosomal alpha-glucosidase	NA	carbohydrate binding	carbohydrate metabolic process	integral component of membrane
Hsym|HyS0001.58	XP_002157808.2 PREDICTED: uncharacterized protein LOC100204451 [Hydra vulgaris]	1.1e-53	Rho GTPase-activating protein 100F	NA	NA	NA	NA
Hsym|HyS0001.59	XP_027051690.1 uncharacterized protein LOC113678971 [Pocillopora damicornis]	1e-220	Collagen alpha-1(XII) chain	NA	chitin binding	chitin metabolic process	collagen trimer
Hsym|HyS0001.60	XP_002161611.3 PREDICTED: probable signal peptidase complex subunit 2 [Hydra vulgaris]	1.1e-64	Signal peptidase complex subunit 2	NA	peptidase activity	signal peptide processing	signal peptidase complex
Hsym|HyS0001.61	XP_002163568.3 PREDICTED: protein C12orf4 homolog isoform X1 [Hydra vulgaris]	1e-163	NA	NA	NA	NA	NA
Hsym|HyS0001.62	XP_002165179.3 PREDICTED: medium-chain specific acyl-CoA dehydrogenase, mitochondrial-like [Hydra vulgaris]	1.4e-181	Medium-chain specific acyl-CoA dehydrogenase, mitochondrial	NA	acyl-CoA dehydrogenase activity	fatty acid beta-oxidation	mitochondrion
Hsym|HyS0001.63	XP_014450966.1 PREDICTED: isovaleryl-CoA dehydrogenase, mitochondrial [Alligator mississippiensis]	3.6e-50	DNA-directed RNA polymerase subunit beta	IVD	acyl-CoA dehydrogenase activity	oxidation-reduction process	mitochondrion
Hsym|HyS0001.64	RKP23953.1 acyl-CoA dehydrogenase/oxidase [Syncephalis pseudoplumigaleata]	1e-70	Isovaleryl Coenzyme A dehydrogenase	IVD	acyl-CoA dehydrogenase activity	oxidation-reduction process	mitochondrion
Hsym|HyS0001.65	XP_012559220.1 PREDICTED: RING finger protein 141-like [Hydra vulgaris]	2.4e-59	RING-type domain-containing protein	NA	NA	NA	NA
Hsym|HyS0001.66	XP_002166692.2 PREDICTED: kinesin-like protein KIF18A [Hydra vulgaris]	1.7e-208	Kinesin motor domain-containing protein (Fragment)	NA	microtubule motor activity	microtubule-based movement	microtubule
Hsym|HyS0001.67	XP_002154090.1 PREDICTED: disintegrin and metalloproteinase domain-containing protein 10-like [Hydra vulgaris]	2.2e-304	Disintegrin and metalloproteinase domain-containing protein 10 (Fragment)	NA	metalloendopeptidase activity	membrane protein ectodomain proteolysis	integral component of membrane
Hsym|HyS0001.68	AOF43158.1 histone CENP-A [Hydractinia echinata]	8.3e-63	Centromere protein that resembles histones, required for proper kinetochore function	NA	protein heterodimerization activity	NA	nucleosome
Hsym|HyS0001.69	KPP78985.1 hypothetical protein Z043_101471 [Scleropages formosus]	8.8e-52	Ubiquitin conjugating enzyme E2 Z	UBE2Z	ubiquitin conjugating enzyme activity	protein ubiquitination	nucleoplasm
Hsym|HyS0001.70	XP_012556548.1 PREDICTED: DNL-type zinc finger protein-like [Hydra vulgaris]	3.3e-27	DNL-type zinc finger	NA	zinc ion binding	protein import into mitochondrial matrix	mitochondrion
Hsym|HyS0001.71	XP_020627304.1 probable peptidyl-tRNA hydrolase [Orbicella faveolata]	3.1e-35	Aminoacyl-tRNA hydrolase	PTH	aminoacyl-tRNA hydrolase activity	translation	cytoplasm
Hsym|HyS0001.72	ARX80208.1 notch-b [Hydractinia echinata]	0	Ankyrin repeat domain-containing protein 50	NA	calcium ion binding	Notch signaling pathway	integral component of membrane
Hsym|HyS0001.73	XP_020608670.1 voltage-dependent calcium channel subunit alpha-2/delta-3-like [Orbicella faveolata]	8.9e-169	VWFA domain-containing protein	NA	voltage-gated calcium channel activity	calcium ion transmembrane transport	voltage-gated calcium channel complex
Hsym|HyS0001.74	PFX28904.1 hypothetical protein AWC38_SpisGene6345 [Stylophora pistillata]	1.8e-21	NA	NA	NA	NA	NA
Hsym|HyS0001.75	XP_012557593.1 PREDICTED: uncharacterized protein LOC100209684 [Hydra vulgaris]	2.9e-149	Ankyrin repeat domain-containing protein	NA	NA	NA	NA
Hsym|HyS0001.76	XP_012862052.1 PREDICTED: seminal plasma protein PDC-109-like [Echinops telfairi]	1.8e-05	Seminal plasma protein 2	NA	heparin binding	sperm capacitation	cell surface
Hsym|HyS0001.77	XP_012566803.1 PREDICTED: conserved oligomeric Golgi complex subunit 7-like [Hydra vulgaris]	2.5e-181	Component of oligomeric golgi complex 7	COG7	NA	intracellular protein transport	Golgi transport complex
Hsym|HyS0001.78	XP_012560047.1 PREDICTED: calcium channel flower-like [Hydra vulgaris]	1.9e-41	NA	NA	NA	NA	NA
Hsym|HyS0001.79	XP_002158018.2 PREDICTED: vesicle-associated membrane protein 4-like [Hydra vulgaris]	2.4e-31	Vesicle-associated membrane protein 4	NA	NA	vesicle-mediated transport	vacuolar membrane
Hsym|HyS0001.80	XP_012566709.1 PREDICTED: uncharacterized protein LOC101239179 [Hydra vulgaris]	1.4e-31	Choice-of-anchor A domain-containing protein	NA	NA	NA	keratin filament
Hsym|HyS0001.82	XP_012557210.1 PREDICTED: laminin subunit gamma-1 [Hydra vulgaris]	0	Laminin subunit gamma-1	LAMC3	extracellular matrix structural constituent	astrocyte development	basement membrane
Hsym|HyS0001.83	XP_020611246.1 protein c-ets-2-A-like isoform X1 [Orbicella faveolata]	6.2e-25	NA	NA	NA	NA	NA
Hsym|HyS0001.84	XP_019622830.1 PREDICTED: tigger transposable element-derived protein 1-like [Branchiostoma belcheri]	1.7e-55	Tigger transposable element-derived 6-like protein	NA	metal ion binding	NA	NA
Hsym|HyS0001.86	XP_012565991.1 PREDICTED: phosphoinositide 3-kinase regulatory subunit 4-like, partial [Hydra vulgaris]	0	Follicle-stimulating hormone beta subunit molecule	PIK3R4	protein kinase activity	protein phosphorylation	phosphatidylinositol 3-kinase complex, class III
Hsym|HyS0001.87	XP_015766352.1 PREDICTED: mutS protein homolog 4-like [Acropora digitifera]	7.8e-291	mutS protein homolog 4	MSH4	mismatched DNA binding	mismatch repair	recombination nodule
Hsym|HyS0001.88	XP_012562626.1 PREDICTED: uncharacterized protein LOC101234877 [Hydra vulgaris]	1.1e-13	NA	NA	NA	NA	NA
Hsym|HyS0001.89	XP_002160936.2 PREDICTED: CD151 antigen-like [Hydra vulgaris]	1.1e-85	Tetraspanin	NA	NA	NA	integral component of membrane
Hsym|HyS0001.92	XP_012566382.1 PREDICTED: uncharacterized protein PFB0145c-like [Hydra vulgaris]	1.8e-59	NA	NA	NA	NA	NA
Hsym|HyS0001.94	XP_013920377.1 PREDICTED: FERM domain-containing protein 1 isoform X2 [Thamnophis sirtalis]	5.5e-06	NA	NA	NA	NA	NA
Hsym|HyS0001.95	XP_002170861.3 PREDICTED: uncharacterized protein LOC100215981 [Hydra vulgaris]	3.9e-20	NA	NA	NA	NA	NA
Hsym|HyS0001.96	XP_002170861.3 PREDICTED: uncharacterized protein LOC100215981 [Hydra vulgaris]	2.8e-18	NA	NA	NA	NA	NA
Hsym|HyS0001.97	XP_002158911.2 PREDICTED: uncharacterized protein LOC100201052 [Hydra vulgaris]	2e-16	NA	NA	NA	NA	NA
Hsym|HyS0001.98	XP_012558982.1 PREDICTED: nose resistant to fluoxetine protein 6-like [Hydra vulgaris]	4.4e-154	nose resistant to fluoxetine protein 6	NA	transferase activity, transferring acyl groups other than amino-acyl groups	RNA metabolic process	integral component of membrane
Hsym|HyS0001.99	XP_002166013.3 PREDICTED: adiponectin receptor protein 1-like [Hydra vulgaris]	2.3e-184	Adiponectin receptor	NA	signaling receptor activity	adiponectin-activated signaling pathway	integral component of membrane
Hsym|HyS0001.100	XP_004208354.1 PREDICTED: uncharacterized protein LOC101234497 [Hydra vulgaris]	7.4e-40	Phytochelatin synthase, bacterial type	NA	glutathione gamma-glutamylcysteinyltransferase activity	phytochelatin metabolic process	NA
Hsym|HyS0001.101	XP_002164883.3 PREDICTED: uncharacterized protein LOC100201509 isoform X1 [Hydra vulgaris]	0	Myotubularin protein 8	NA	protein tyrosine phosphatase activity	peptidyl-tyrosine dephosphorylation	plasma membrane
Hsym|HyS0001.102	XP_028407601.1 DNA-directed RNA polymerase, mitochondrial-like [Dendronephthya gigantea]	2.6e-251	DNA-directed RNA polymerase	POLRMT	DNA-directed 5'-3' RNA polymerase activity	transcription, DNA-templated	mitochondrial nucleoid
Hsym|HyS0001.103	XP_002160860.1 PREDICTED: macrophage erythroblast attacher-like [Hydra vulgaris]	2.3e-131	macrophage erythroblast attacher	NA	ubiquitin-protein transferase activity	negative regulation of gluconeogenesis	GID complex
Hsym|HyS0001.104	XP_004626507.1 DNA-directed RNA polymerase I subunit RPA43 [Octodon degus]	3.3e-25	NA	NA	NA	NA	NA
Hsym|HyS0001.105	XP_002163022.3 PREDICTED: large proline-rich protein bag6-A-like [Hydra vulgaris]	6.2e-168	Ubiquitin domain	NA	NA	NA	NA
Hsym|HyS0001.106	XP_012564786.1 PREDICTED: sodium/potassium-transporting ATPase subunit alpha-1-like [Hydra vulgaris]	5.5e-40	Sodium/potassium-transporting ATPase subunit alpha	NA	nucleotide binding	potassium ion transmembrane transport	integral component of membrane
Hsym|HyS0001.107	XP_002165404.3 PREDICTED: ras guanine nucleotide exchange factor R-like [Hydra vulgaris]	1.8e-106	Cat eye syndrome critical region protein 2	CECR2	NA	ATP-dependent chromatin remodeling	CERF complex
Hsym|HyS0001.108	XP_013393891.1 protein rolling stone-like [Lingula anatina]	4.7e-15	NA	NA	NA	NA	NA
Hsym|HyS0001.109	XP_012566062.1 PREDICTED: uncharacterized protein LOC105850126 [Hydra vulgaris]	3.8e-53	NA	NA	NA	NA	NA
Hsym|HyS0001.110	XP_027042233.1 sodium/hydrogen exchanger 10-like [Pocillopora damicornis]	0	Sperm-specific sodium proton exchanger	NA	solute:proton antiporter activity	proton transmembrane transport	integral component of membrane
Hsym|HyS0001.111	XP_012564488.1 PREDICTED: vesicle transport protein GOT1B-like [Hydra vulgaris]	2.5e-63	Vesicle transport protein GOT1B	GOLT1B	NA	vesicle-mediated transport	endoplasmic reticulum
Hsym|HyS0001.112	XP_027044738.1 mitochondrial-processing peptidase subunit alpha-like [Pocillopora damicornis]	1.2e-156	Mitochondrial-processing peptidase subunit alpha	NA	metalloendopeptidase activity	proteolysis	mitochondrion
Hsym|HyS0001.114	XP_004206512.2 PREDICTED: GTPase-activating Rap/Ran-GAP domain-like protein 3 [Hydra vulgaris]	0	Gtpase activating rap/ran gap domain like protein 3	GARNL3	GTPase activator activity	regulation of small GTPase mediated signal transduction	intracellular membrane-bounded organelle
Hsym|HyS0001.115	XP_028410526.1 60S ribosomal protein L27a-like [Dendronephthya gigantea]	1.3e-62	Large subunit ribosomal protein L27Ae	RPL27A	structural constituent of ribosome	translation	large ribosomal subunit
Hsym|HyS0001.116	XP_004206018.1 PREDICTED: zinc finger protein 585A-like [Hydra vulgaris]	2.7e-193	GDNF inducible zinc finger protein 1	GZF1	nucleic acid binding	regulation of transcription, DNA-templated	nucleus
Hsym|HyS0001.117	XP_012561429.1 PREDICTED: acyl-CoA synthetase short-chain family member 3, mitochondrial-like [Hydra vulgaris]	1.8e-263	AMP-dependent synthetase and ligase	PRPE	propionate-CoA ligase activity	oxidation-reduction process	NA
Hsym|HyS0001.118	XP_012555042.1 PREDICTED: tRNA wybutosine-synthesizing protein 3 homolog [Hydra vulgaris]	7.7e-58	tRNA wybutosine-synthesizing protein 3	TYW3	tRNA methyltransferase activity	wybutosine metabolic process	cytoplasm
Hsym|HyS0001.119	XP_012555040.1 PREDICTED: uncharacterized protein LOC105843789 [Hydra vulgaris]	1e-25	NA	NA	NA	NA	NA
Hsym|HyS0001.120	XP_002165194.3 PREDICTED: vacuolar protein sorting-associated protein 72 homolog [Hydra vulgaris]	2.3e-45	Vacuolar protein sorting-associated protein 72	VPS72	DNA binding	histone exchange	nucleus
Hsym|HyS0001.121	XP_002167762.3 PREDICTED: tyrosine-protein kinase ABL1 [Hydra vulgaris]	2.4e-274	Tyrosine-protein kinase Abl	NA	non-membrane spanning protein tyrosine kinase activity	peptidyl-tyrosine phosphorylation	NA
Hsym|HyS0001.123	XP_013384554.1 ubiquitin-related modifier 1-like [Lingula anatina]	3.5e-32	Ubiquitin-related modifier 1 homolog	URM1	sulfur carrier activity	tRNA thio-modification	cytosol
Hsym|HyS0001.124	XP_002157600.1 PREDICTED: 60S ribosomal protein L35-like [Hydra vulgaris]	1.5e-46	Tuftelin-interacting protein 11	NA	structural constituent of ribosome	translation	ribosome
Hsym|HyS0001.125	XP_012556658.1 PREDICTED: uncharacterized protein LOC100213741 [Hydra vulgaris]	1.4e-32	NA	NA	NA	NA	NA
Hsym|HyS0001.126	XP_004211348.2 PREDICTED: torsin-1A-like [Hydra vulgaris]	6.1e-100	Glycerol-3-phosphate dehydrogenase	NA	unfolded protein binding	synaptic vesicle transport	endoplasmic reticulum lumen
Hsym|HyS0001.127	XP_002156548.1 PREDICTED: 28S ribosomal protein S2, mitochondrial-like [Hydra vulgaris]	1.6e-82	Phosphatase 1 regulatory subunit 26	MRPS2	structural constituent of ribosome	translation	small ribosomal subunit
Hsym|HyS0001.128	XP_020906385.1 carboxylesterase notum2-like [Exaiptasia pallida]	7e-113	NA	NA	NA	NA	NA
Hsym|HyS0001.129	XP_012559763.1 PREDICTED: coiled-coil-helix-coiled-coil-helix domain-containing protein 5-like [Hydra vulgaris]	8.8e-23	NA	NA	NA	NA	NA
Hsym|HyS0001.130	XP_001639232.1 predicted protein [Nematostella vectensis]	8e-87	Leucine-rich repeat and IQ domain-containing protein 3	NA	NA	NA	NA
Hsym|HyS0001.131	XP_019631342.1 PREDICTED: LOW QUALITY PROTEIN: cytosolic carboxypeptidase 6-like [Branchiostoma belcheri]	5.4e-186	cytosolic carboxypeptidase 6	AGBL4	metallocarboxypeptidase activity	proteolysis	centriole
Hsym|HyS0001.132	XP_001638402.1 predicted protein [Nematostella vectensis]	1.7e-35	NA	NA	NA	NA	NA
Hsym|HyS0001.133	XP_027050549.1 uncharacterized protein LOC113677894 [Pocillopora damicornis]	1.2e-103	NA	NA	NA	NA	NA
Hsym|HyS0001.134	XP_001633787.1 predicted protein [Nematostella vectensis]	4.6e-105	NA	NA	NA	NA	NA
Hsym|HyS0001.135	XP_001633787.1 predicted protein [Nematostella vectensis]	8.9e-77	NA	NA	NA	NA	NA
Hsym|HyS0001.136	XP_012555211.1 PREDICTED: ATP-binding cassette sub-family F member 1-like [Hydra vulgaris]	1.2e-267	ATP-binding cassette sub-family F member	ABCF1	ATPase activity	NA	NA
Hsym|HyS0001.137	XP_012561922.1 PREDICTED: SUN domain-containing ossification factor-like [Hydra vulgaris]	1.4e-86	SUN domain-containing ossification factor	NA	serine-type endopeptidase activity	proteolysis	integral component of membrane
Hsym|HyS0001.139	XP_012555800.1 PREDICTED: collagen alpha-1(V) chain-like [Hydra vulgaris]	2.1e-49	Collagen type XI alpha 2 chain	COL11A2	extracellular matrix structural constituent	collagen fibril organization	collagen trimer
Hsym|HyS0001.141	XP_011662466.1 PREDICTED: uncharacterized protein LOC105437506 [Strongylocentrotus purpuratus]	4.4e-113	SET domain-containing protein	NA	NA	NA	NA
Hsym|HyS0001.143	XP_020627438.1 transmembrane protein 246-like [Orbicella faveolata]	4.4e-41	NA	NA	NA	NA	NA
Hsym|HyS0001.145	NP_001296675.1 serine/threonine-protein kinase N2-like [Hydra vulgaris]	2.8e-238	Non-specific serine/threonine protein kinase	NA	GTP-Rho binding	protein phosphorylation	cleavage furrow
Hsym|HyS0001.146	XP_012560777.1 PREDICTED: uncharacterized protein LOC101239942 [Hydra vulgaris]	3e-21	NA	NA	NA	NA	NA
Hsym|HyS0001.147	XP_012564112.1 PREDICTED: uncharacterized protein LOC105848528 [Hydra vulgaris]	1.5e-53	NA	NA	NA	NA	NA
Hsym|HyS0001.148	XP_012557777.1 PREDICTED: serine/threonine-protein kinase 38-like [Hydra vulgaris]	7.7e-235	Non-specific serine/threonine protein kinase	NA	protein serine/threonine kinase activity	protein phosphorylation	actin cytoskeleton
Hsym|HyS0001.149	NP_001274708.1 uncharacterized protein LOC100203431 [Hydra vulgaris]	4.4e-100	NA	NA	NA	NA	NA
Hsym|HyS0001.150	XP_012557776.1 PREDICTED: uncharacterized protein LOC100207836 [Hydra vulgaris]	7.4e-81	NA	NA	NA	NA	NA
Hsym|HyS0001.151	XP_002165749.3 PREDICTED: probable 3',5'-cyclic phosphodiesterase pde-5 [Hydra vulgaris]	0	Phosphodiesterase	NA	3',5'-cyclic-nucleotide phosphodiesterase activity	signal transduction	NA
Hsym|HyS0001.152	XP_002166554.1 PREDICTED: 39S ribosomal protein L55, mitochondrial-like isoform X1 [Hydra vulgaris]	4.4e-29	NA	NA	NA	NA	NA
Hsym|HyS0001.153	XP_003468554.1 ethylmalonyl-CoA decarboxylase [Cavia porcellus]	2.3e-09	Fatty acid oxidation complex subunit alpha FadB	NA	dodecenoyl-CoA delta-isomerase activity	fatty acid beta-oxidation	fatty acid beta-oxidation multienzyme complex
Hsym|HyS0001.154	XP_015779580.1 PREDICTED: uncharacterized protein LOC107357456 [Acropora digitifera]	8.3e-18	NA	NA	NA	NA	NA
Hsym|HyS0001.156	XP_020610424.1 histamine H2 receptor-like [Orbicella faveolata]	2.9e-26	NA	NA	NA	NA	NA
Hsym|HyS0001.158	XP_012564244.1 PREDICTED: multivesicular body subunit 12A-like [Hydra vulgaris]	8.3e-51	NA	NA	NA	NA	NA
Hsym|HyS0001.159	XP_012564243.1 PREDICTED: myotrophin-like [Hydra vulgaris]	1.7e-39	Ankyrin repeat domain-containing protein 52	NA	protein prenyltransferase activity	negative regulation of barbed-end actin filament capping	signal recognition particle
Hsym|HyS0001.160	XP_001635956.1 predicted protein [Nematostella vectensis]	7.7e-65	MORN repeat-containing protein 5	MORN5	calcium ion binding	NA	NA
Hsym|HyS0001.161	XP_004206807.1 PREDICTED: caprin-1-like [Hydra vulgaris]	4.5e-66	Translation initiation factor IF-2	NA	translation initiation factor activity	translational initiation	keratin filament
Hsym|HyS0001.162	XP_002167771.2 PREDICTED: negative elongation factor B-like [Hydra vulgaris]	3.3e-195	Negative elongation factor complex member B	NA	translation elongation factor activity	negative regulation of transcription, DNA-templated	nucleus
Hsym|HyS0001.164	XP_002161852.1 PREDICTED: uncharacterized protein LOC100212612 isoform X1 [Hydra vulgaris]	4.1e-48	Ets DNA-binding protein pokkuri	NA	sequence-specific DNA binding	regulation of transcription, DNA-templated	nucleus
Hsym|HyS0001.165	CDW73044.1 uncharacterized protein containing a nrps condensation domain [Stylonychia lemnae]	4.1e-06	NA	NA	NA	NA	NA
Hsym|HyS0001.166	XP_015771981.1 PREDICTED: monocarboxylate transporter 12-like isoform X1 [Acropora digitifera]	4.9e-44	NA	NA	NA	NA	NA
Hsym|HyS0001.167	XP_001638270.1 predicted protein [Nematostella vectensis]	1.1e-40	NA	NA	NA	NA	NA
Hsym|HyS0001.168	XP_020614166.1 dopamine receptor 2-like [Orbicella faveolata]	1.8e-17	NA	NA	NA	NA	NA
Hsym|HyS0001.169	XP_002157837.2 PREDICTED: cdc42-interacting protein 4 homolog [Hydra vulgaris]	1.5e-185	Thyroid hormone receptor interactor 10	NA	NA	NA	NA
Hsym|HyS0001.170	XP_012558527.1 PREDICTED: far upstream element-binding protein 3-like isoform X3 [Hydra vulgaris]	1.6e-150	Far upstream element-binding protein 3	NA	RNA binding	regulation of transcription, DNA-templated	nucleus
Hsym|HyS0001.171	XP_002160119.1 PREDICTED: trans-L-3-hydroxyproline dehydratase-like [Hydra vulgaris]	1.8e-118	trans-3-hydroxy-L-proline dehydratase	NA	hydro-lyase activity	regulation of ion transmembrane transport	integral component of membrane
Hsym|HyS0001.172	XP_012564263.1 PREDICTED: kinesin-like protein KIF14 [Hydra vulgaris]	0	Kinesin motor domain-containing protein (Fragment)	KIF14	microtubule motor activity	microtubule-based movement	Flemming body
Hsym|HyS0001.173	XP_002158884.2 PREDICTED: nucleobindin-2-like isoform X1 [Hydra vulgaris]	1.2e-104	DNA-binding protein of the nucleobindin family	NA	calcium ion binding	carbohydrate metabolic process	endoplasmic reticulum-Golgi intermediate compartment
Hsym|HyS0001.174	XP_002739447.1 PREDICTED: solute carrier family 15 member 4-like [Saccoglossus kowalevskii]	3.5e-119	Solute carrier family 15 (oligopeptide transporter), member 4	SLC15A4	transmembrane transporter activity	oligopeptide transport	integral component of membrane
Hsym|HyS0001.175	XP_012555992.1 PREDICTED: kinesin-like protein KIF23 isoform X1 [Hydra vulgaris]	9.4e-300	Kinesin motor domain-containing protein	KIF23	microtubule motor activity	plus-end-directed vesicle transport along microtubule	microtubule
Hsym|HyS0001.176	PFX20338.1 hypothetical protein AWC38_SpisGene15206 [Stylophora pistillata]	7.5e-19	NA	NA	NA	NA	NA
Hsym|HyS0001.177	XP_022790447.1 CD151 antigen-like [Stylophora pistillata]	1.4e-24	NA	NA	NA	NA	NA
Hsym|HyS0001.178	XP_002162040.1 PREDICTED: exosome complex component CSL4-like [Hydra vulgaris]	7.9e-68	Exosome complex component CSL	EXOSC1	RNA binding	RNA processing	exosome (RNase complex)
Hsym|HyS0001.179	XP_012559590.1 PREDICTED: probable serine racemase [Hydra vulgaris]	2.6e-79	L-threonine dehydratase catabolic TdcB	NA	L-threonine ammonia-lyase activity	L-serine catabolic process	integral component of membrane
Hsym|HyS0001.180	XP_012559588.1 PREDICTED: probable cation-transporting ATPase 13A3 [Hydra vulgaris]	0	Cation-transporting ATPase	NA	ATPase activity	cation transport	integral component of membrane
Hsym|HyS0001.181	XP_028416582.1 uncharacterized protein LOC114540659 [Dendronephthya gigantea]	5.5e-08	NA	NA	NA	NA	NA
Hsym|HyS0001.182	RMX37173.1 hypothetical protein pdam_00010691 [Pocillopora damicornis]	8.3e-201	Prohibitins and stomatins of the pid superfamily	NA	RNA polymerase binding	regulation of acid-sensing ion channel activity	integral component of membrane
Hsym|HyS0001.184	PFX22544.1 Intelectin-1 [Stylophora pistillata]	4.8e-18	NA	NA	NA	NA	NA
Hsym|HyS0001.185	XP_012566709.1 PREDICTED: uncharacterized protein LOC101239179 [Hydra vulgaris]	4.6e-29	NA	NA	NA	NA	NA
Hsym|HyS0001.186	XP_027199906.1 discoidin domain-containing receptor 2-like isoform X2 [Dermatophagoides pteronyssinus]	1.6e-10	NA	NA	NA	NA	NA
Hsym|HyS0001.187	XP_012562957.1 PREDICTED: discoidin domain-containing receptor 2 isoform X2 [Hydra vulgaris]	1.3e-68	NA	NA	NA	NA	NA
Hsym|HyS0001.188	XP_012566709.1 PREDICTED: uncharacterized protein LOC101239179 [Hydra vulgaris]	1.5e-18	NA	NA	NA	NA	NA
Hsym|HyS0001.191	XP_012562957.1 PREDICTED: discoidin domain-containing receptor 2 isoform X2 [Hydra vulgaris]	3.6e-38	NA	NA	NA	NA	NA
Hsym|HyS0001.192	XP_012562956.1 PREDICTED: discoidin domain-containing receptor 2 isoform X1 [Hydra vulgaris]	0.00043	NA	NA	NA	NA	NA
Hsym|HyS0001.193	RMX39064.1 hypothetical protein pdam_00022409, partial [Pocillopora damicornis]	4.3e-22	NA	NA	NA	NA	NA
Hsym|HyS0001.194	ACM68729.1 protein kinase Mos2 [Clytia hemisphaerica]	1.6e-80	Serine/threonine-protein kinase-transforming protein mos	MOS	protein serine/threonine kinase activity	protein phosphorylation	cytosol
Hsym|HyS0001.195	XP_026027759.1 B-cell receptor CD22-like [Astatotilapia calliptera]	4.3e-13	NA	NA	NA	NA	NA
Hsym|HyS0001.196	XP_012559151.1 PREDICTED: potassium voltage-gated channel subfamily A member 1-like [Hydra vulgaris]	3.9e-63	NA	NA	NA	NA	NA
Hsym|HyS0001.197	XP_002159184.2 PREDICTED: chymotrypsin-like elastase family member 3B [Hydra vulgaris]	1.2e-69	Sea star regeneration-associated protease SRAP	NA	serine-type endopeptidase activity	proteolysis	extracellular region
Hsym|HyS0001.198	XP_021370202.1 Williams-Beuren syndrome chromosomal region 27 protein-like [Mizuhopecten yessoensis]	3e-12	NA	NA	NA	NA	NA
Hsym|HyS0001.199	XP_012561916.1 PREDICTED: potassium voltage-gated channel subfamily A member 1-like [Hydra vulgaris]	3.8e-52	Potassium voltage-gated channel subfamily A member 3	KCNA6	voltage-gated potassium channel activity	regulation of ion transmembrane transport	voltage-gated potassium channel complex
Hsym|HyS0001.200	XP_020624510.1 A disintegrin and metalloproteinase with thrombospondin motifs 6-like [Orbicella faveolata]	1e-221	A disintegrin and metalloproteinase with thrombospondin motifs 16	NA	metalloendopeptidase activity	integrin-mediated signaling pathway	basement membrane
Hsym|HyS0001.202	XP_012554416.1 PREDICTED: uncharacterized protein LOC100208687 [Hydra vulgaris]	1.5e-28	CUB domain-containing protein (Fragment)	NA	NA	NA	NA
Hsym|HyS0001.203	XP_012554417.1 PREDICTED: NADPH-dependent diflavin oxidoreductase 1-like [Hydra vulgaris]	3.1e-203	NADPH-dependent diflavin oxidoreductase 1	NDOR1	NADPH-hemoprotein reductase activity	iron-sulfur cluster assembly	perinuclear region of cytoplasm
Hsym|HyS0001.204	XP_012556891.1 PREDICTED: ATP-binding cassette sub-family A member 1 [Hydra vulgaris]	0	ATP-binding cassette sub-family A member 2	ABCA2	ATPase-coupled transmembrane transporter activity	transmembrane transport	lysosome
Hsym|HyS0001.206	XP_011683244.1 PREDICTED: uncharacterized protein LOC105447183 [Strongylocentrotus purpuratus]	0.00023	NA	NA	NA	NA	NA
Hsym|HyS0001.207	XP_012555548.1 PREDICTED: cholinephosphotransferase 1-like [Hydra vulgaris]	1.4e-124	Choline/ethanolaminephosphotransferase	NA	phosphotransferase activity, for other substituted phosphate groups	phospholipid biosynthetic process	integral component of membrane
Hsym|HyS0001.208	XP_002163264.3 PREDICTED: zinc-binding alcohol dehydrogenase domain-containing protein 2-like [Hydra vulgaris]	8.7e-129	Zinc-binding alcohol dehydrogenase domain-containing protein 2	ZADH2	zinc ion binding	oxidation-reduction process	peroxisome
Hsym|HyS0001.209	XP_012553889.1 PREDICTED: archaemetzincin-2-like isoform X1 [Hydra vulgaris]	1.5e-84	Archaemetzincin-2	NA	metallopeptidase activity	proteolysis	NA
Hsym|HyS0001.211	XP_020909824.1 uncharacterized protein LOC110247706 [Exaiptasia pallida]	1.4e-273	tRNA-splicing endonuclease positive effector	NA	helicase activity	nuclear-transcribed mRNA catabolic process, nonsense-mediated decay	cytoplasm
Hsym|HyS0001.212	XP_015751986.1 PREDICTED: leucine-rich repeat-containing protein 74B-like [Acropora digitifera]	1.3e-32	Leucine-rich repeat-containing protein 74A	NA	calcium ion binding	NA	NA
Hsym|HyS0001.213	XP_002155679.3 PREDICTED: protein FAM73A-like [Hydra vulgaris]	5e-128	Mitoguardin 1	NA	protein homodimerization activity	mitochondrial fusion	mitochondrial outer membrane
Hsym|HyS0001.214	XP_027046958.1 activating molecule in BECN1-regulated autophagy protein 1-like [Pocillopora damicornis]	1.3e-102	Activating molecule in BECN1-regulated autophagy protein 1	AMBRA1	metal ion binding	autophagy	RSF complex
Hsym|HyS0001.215	XP_002162455.3 PREDICTED: uncharacterized protein LOC100208400 [Hydra vulgaris]	1.4e-83	Hexosyltransferase	NA	galactosyltransferase activity	protein glycosylation	Golgi apparatus
Hsym|HyS0001.216	XP_012555548.1 PREDICTED: cholinephosphotransferase 1-like [Hydra vulgaris]	4.2e-124	Choline/ethanolaminephosphotransferase	NA	phosphotransferase activity, for other substituted phosphate groups	phospholipid biosynthetic process	integral component of membrane
Hsym|HyS0001.217	XP_002156912.2 PREDICTED: zinc finger protein 683-like isoform X1 [Hydra vulgaris]	3.3e-05	NA	NA	NA	NA	NA
Hsym|HyS0001.218	XP_002166169.3 PREDICTED: activating molecule in BECN1-regulated autophagy protein 1-like [Hydra vulgaris]	7.3e-45	Activating molecule in BECN1-regulated autophagy protein 1	AMBRA1	nucleic acid binding	autophagy	RSF complex
Hsym|HyS0001.220	XP_002166169.3 PREDICTED: activating molecule in BECN1-regulated autophagy protein 1-like [Hydra vulgaris]	3.4e-34	Activating molecule in BECN1-regulated autophagy protein 1	NA	NA	autophagy	NA
Hsym|HyS0001.221	XP_002162455.3 PREDICTED: uncharacterized protein LOC100208400 [Hydra vulgaris]	1.9e-78	Hexosyltransferase	NA	galactosyltransferase activity	protein glycosylation	Golgi membrane
Hsym|HyS0001.222	XP_002162455.3 PREDICTED: uncharacterized protein LOC100208400 [Hydra vulgaris]	8.3e-55	Hexosyltransferase	NA	UDP-galactosyltransferase activity	protein O-linked glycosylation	Golgi membrane
Hsym|HyS0001.224	XP_012562957.1 PREDICTED: discoidin domain-containing receptor 2 isoform X2 [Hydra vulgaris]	2.8e-218	Discoidin domain receptor tyrosine kinase 2	DDR2	transmembrane receptor protein tyrosine kinase activity	peptidyl-tyrosine phosphorylation	integral component of plasma membrane
Hsym|HyS0001.225	XP_002157093.2 PREDICTED: uncharacterized protein LOC100200850 [Hydra vulgaris]	7.4e-131	Ankyrin repeat protein, putative	NA	NA	NA	NA
Hsym|HyS0001.226	XP_012562957.1 PREDICTED: discoidin domain-containing receptor 2 isoform X2 [Hydra vulgaris]	3.9e-64	NA	NA	NA	NA	NA
Hsym|HyS0001.227	KXJ19982.1 V(D)J recombination activating protein 1 [Exaiptasia pallida]	1.2e-31	NA	NA	NA	NA	NA
Hsym|HyS0001.228	XP_002165507.1 PREDICTED: ruvB-like 2 [Hydra vulgaris]	4.5e-232	DNA helicase	RUVBL2	5'-3' DNA helicase activity	DNA duplex unwinding	R2TP complex
Hsym|HyS0001.229	XP_012566912.1 PREDICTED: bcl-2-related ovarian killer protein-like [Hydra vulgaris]	6.8e-60	Bcl-2-related ovarian killer protein	NA	NA	regulation of apoptotic process	integral component of membrane
Hsym|HyS0001.231	XP_028407652.1 vesicular inhibitory amino acid transporter-like [Dendronephthya gigantea]	7.9e-101	Vesicular inhibitory amino acid transporter	NA	NA	NA	integral component of membrane
Hsym|HyS0001.232	XP_004210036.2 PREDICTED: adenylate kinase isoenzyme 5-like [Hydra vulgaris]	4.7e-293	G-protein-signaling modulator 1	AK1	nucleobase-containing compound kinase activity	nucleoside monophosphate phosphorylation	cytoplasm
Hsym|HyS0001.233	XP_018008572.1 PREDICTED: uncharacterized protein LOC108666247 [Hyalella azteca]	1e-34	NA	NA	NA	NA	NA
Hsym|HyS0001.234	XP_018958793.1 PREDICTED: caspase-3-like isoform X1 [Cyprinus carpio]	3.9e-12	NA	NA	NA	NA	NA
Hsym|HyS0001.235	XP_012866129.1 PREDICTED: caspase-8 isoform X1 [Dipodomys ordii]	2.6e-08	NA	NA	NA	NA	NA
Hsym|HyS0001.236	XP_028408491.1 uncharacterized protein LOC114531047 [Dendronephthya gigantea]	8.6e-66	NA	NA	NA	NA	NA
Hsym|HyS0001.237	XP_012557953.1 PREDICTED: Na(+)/H(+) exchanger beta-like [Hydra vulgaris]	1.9e-216	Sodium/hydrogen exchanger	NA	sodium:proton antiporter activity	regulation of pH	integral component of membrane
Hsym|HyS0001.238	XP_012557953.1 PREDICTED: Na(+)/H(+) exchanger beta-like [Hydra vulgaris]	8.6e-212	Sodium/hydrogen exchanger	NA	sodium:proton antiporter activity	regulation of pH	integral component of membrane
Hsym|HyS0001.239	XP_002164178.1 PREDICTED: tubulin delta chain-like [Hydra vulgaris]	3.4e-149	Tubulin delta chain	TUBD1	structural constituent of cytoskeleton	microtubule-based process	microtubule
Hsym|HyS0001.240	XP_002158660.2 PREDICTED: uncharacterized protein LOC100204188 [Hydra vulgaris]	1.7e-93	NA	NA	NA	NA	NA
Hsym|HyS0001.241	XP_002168124.1 PREDICTED: uncharacterized protein LOC100206690 [Hydra vulgaris]	4.3e-28	NA	NA	NA	NA	NA
Hsym|HyS0001.242	KXJ09558.1 Galactosylceramide sulfotransferase [Exaiptasia pallida]	1.5e-91	NA	NA	NA	NA	NA
Hsym|HyS0001.243	XP_002165175.1 PREDICTED: clavaminate synthase-like protein At3g21360 [Hydra vulgaris]	2.9e-99	NA	NA	NA	NA	NA
Hsym|HyS0001.244	XP_002164501.2 PREDICTED: E3 ubiquitin-protein ligase RFWD2-like [Hydra vulgaris]	2.8e-272	Ring finger and WD repeat domain 2	RFWD2	ubiquitin protein ligase activity	positive regulation of proteasomal ubiquitin-dependent protein catabolic process	Cul4A-RING E3 ubiquitin ligase complex
Hsym|HyS0001.245	XP_004206557.2 PREDICTED: WD repeat domain-containing protein 83-like [Hydra vulgaris]	1.9e-100	Mitogen-activated protein kinase organizer 1	WDR83	kinase activity	mRNA splicing, via spliceosome	catalytic step 2 spliceosome
Hsym|HyS0001.247	XP_012553893.1 PREDICTED: general transcription factor IIH subunit 1-like [Hydra vulgaris]	6.2e-171	General transcription factor IIH subunit	GTF2H1	RNA polymerase II CTD heptapeptide repeat kinase activity	nucleotide-excision repair	transcription factor TFIIH core complex
Hsym|HyS0001.248	XP_012563962.1 PREDICTED: myotubularin-related protein 13-like [Hydra vulgaris]	0	SET binding factor 2	NA	phosphatase regulator activity	regulation of GTPase activity	nucleoplasm part
Hsym|HyS0001.249	XP_015754417.1 PREDICTED: carbohydrate sulfotransferase 1-like isoform X1 [Acropora digitifera]	4.3e-28	Nucleolar and coiled-body phosphoprotein 1	NA	NA	NA	nucleolus
Hsym|HyS0001.253	XP_002163471.1 PREDICTED: 60S ribosomal protein L7a-like [Hydra vulgaris]	2.3e-121	Photolyase/cryptochrome alpha/beta domain-containing protein	RPL7A	RNA binding	ribosome biogenesis	ribonucleoprotein complex
Hsym|HyS0001.254	XP_002154507.1 PREDICTED: mediator of RNA polymerase II transcription subunit 22-like [Hydra vulgaris]	4.6e-49	Mediator of RNA polymerase II transcription subunit	MED22	transcription coregulator activity	regulation of transcription by RNA polymerase II	mediator complex
Hsym|HyS0001.255	XP_012557014.1 PREDICTED: helicase SKI2W-like [Hydra vulgaris]	0	Superkiller viralicidic activity 2 (S. cerevisiae homolog)-like	SKIV2L	RNA helicase activity	RNA catabolic process	Ski complex
Hsym|HyS0001.256	XP_002156799.1 PREDICTED: CAS1 domain-containing protein 1-like isoform X1 [Hydra vulgaris]	1.3e-167	O-acetyltransferase family protein isoform 2	NA	acetyltransferase activity	xylan acetylation	Golgi apparatus
Hsym|HyS0001.257	XP_020604159.1 methylmalonic aciduria type A protein, mitochondrial-like [Orbicella faveolata]	7e-105	G-protein chaperone required for conversion of methylmalonyl-CoA to succinyl-CoA	MMAA	GTPase activity	phosphorylation	transcription factor complex
Hsym|HyS0001.258	XP_002156272.1 PREDICTED: 78 kDa glucose-regulated protein-like [Hydra vulgaris]	2.1e-296	Endoplasmic reticulum chaperone BiP	NA	ATP binding	response to yeast	endoplasmic reticulum chaperone complex
Hsym|HyS0001.259	XP_014780512.1 PREDICTED: carbonic anhydrase 12-like isoform X1 [Octopus bimaculoides]	3.2e-31	NA	NA	NA	NA	NA
Hsym|HyS0001.260	XP_002164260.2 PREDICTED: dynamin-1 isoform X1 [Hydra vulgaris]	0	Dynamin	NA	GTPase activity	endocytosis	microtubule
Hsym|HyS0001.261	XP_012558079.1 PREDICTED: meiosis 1 arrest protein-like [Hydra vulgaris]	3.2e-49	NA	NA	NA	NA	NA
Hsym|HyS0001.262	XP_012559393.1 PREDICTED: kelch-like protein 20 [Hydra vulgaris]	6.4e-130	BTB domain-containing protein (Fragment)	KLHL20	interferon-gamma binding	protein K33-linked ubiquitination	PML body
Hsym|HyS0001.263	XP_785800.2 PREDICTED: glutathione S-transferase P [Strongylocentrotus purpuratus]	8.3e-74	Glutathione S-transferase	NA	glutathione transferase activity	glutathione metabolic process	cytosol
Hsym|HyS0001.264	XP_004209769.1 PREDICTED: tctex1 domain-containing protein 3-like [Hydra vulgaris]	2.7e-29	Tctex1 domain-containing protein 1	NA	NA	NA	NA
Hsym|HyS0001.265	XP_002157094.3 PREDICTED: uncharacterized protein LOC100204652 isoform X1 [Hydra vulgaris]	2.5e-58	NA	NA	NA	NA	NA
Hsym|HyS0001.266	XP_012560124.1 PREDICTED: uncharacterized protein LOC105846192 [Hydra vulgaris]	9.8e-67	NA	NA	NA	NA	NA
Hsym|HyS0001.267	XP_012560124.1 PREDICTED: uncharacterized protein LOC105846192 [Hydra vulgaris]	4.8e-53	NA	NA	NA	NA	NA
Hsym|HyS0001.268	XP_002157093.2 PREDICTED: uncharacterized protein LOC100200850 [Hydra vulgaris]	8.5e-119	NA	NA	NA	NA	NA
Hsym|HyS0001.269	XP_002732203.1 PREDICTED: protein-glutamine gamma-glutamyltransferase K-like [Saccoglossus kowalevskii]	1.6e-123	Hemocyte protein-glutamine gamma-glutamyltransferase	NA	protein-glutamine gamma-glutamyltransferase activity	peptide cross-linking	collagen-containing extracellular matrix
Hsym|HyS0001.271	XP_027054675.1 uncharacterized protein LOC113681753 [Pocillopora damicornis]	4.5e-61	NA	NA	NA	NA	NA
Hsym|HyS0001.272	XP_012554789.1 PREDICTED: alpha-tubulin N-acetyltransferase 1-like isoform X2 [Hydra vulgaris]	6.9e-56	Alpha-tubulin N-acetyltransferase	ATAT1	tubulin N-acetyltransferase activity	alpha-tubulin acetylation	microtubule
Hsym|HyS0001.273	XP_012560885.1 PREDICTED: choline transporter-like protein 4 isoform X2 [Hydra vulgaris]	4.3e-279	LOW QUALITY PROTEIN: choline transporter-like protein 4	SLC44A2	thiamine pyrophosphate transmembrane transporter activity	acetylcholine secretion	apical plasma membrane
Hsym|HyS0001.274	XP_019639836.1 PREDICTED: uncharacterized protein LOC109481690 [Branchiostoma belcheri]	1.3e-18	NA	NA	NA	NA	NA
Hsym|HyS0001.275	XP_002160653.1 PREDICTED: E3 ubiquitin-protein ligase Praja-1-like, partial [Hydra vulgaris]	7.7e-71	RING finger protein 38	NA	ubiquitin-protein transferase activity	behavioral response to ethanol	nucleus
Hsym|HyS0001.276	XP_027045027.1 uncharacterized protein LOC113672880 [Pocillopora damicornis]	4.8e-303	Soluble adenylyl cyclase	NA	phosphorus-oxygen lyase activity	cyclic nucleotide biosynthetic process	cytoplasm
Hsym|HyS0001.277	XP_009060805.1 hypothetical protein LOTGIDRAFT_234488 [Lottia gigantea]	6.2e-06	NA	NA	NA	NA	NA
Hsym|HyS0001.280	XP_020603364.1 putative uncharacterized protein DDB_G0274435 [Orbicella faveolata]	5.1e-11	NA	NA	NA	NA	NA
Hsym|HyS0001.281	XP_012563848.1 PREDICTED: Niemann-Pick C1 protein-like [Hydra vulgaris]	0	NPC intracellular cholesterol transporter 1	NPC1	lipid transporter activity	lipid transport	integral component of lysosomal membrane
Hsym|HyS0001.282	XP_012566452.1 PREDICTED: putative uncharacterized protein DDB_G0282133 [Hydra vulgaris]	5.6e-12	NA	NA	NA	NA	NA
Hsym|HyS0001.283	XP_015777259.1 PREDICTED: leucine-rich repeat-containing protein 42-like [Acropora digitifera]	9.5e-18	NA	NA	NA	NA	NA
Hsym|HyS0001.284	XP_019631235.1 PREDICTED: LOW QUALITY PROTEIN: leucine-rich repeat-containing protein 42-like [Branchiostoma belcheri]	2.6e-06	Leucine-rich repeat-containing protein 42	LRRC42	thyroxine 5'-deiodinase activity	oxidation-reduction process	NA
Hsym|HyS0001.285	QBL02596.1 biogenic amine-like GPCR [Tripedalia cystophora]	8.7e-06	NA	NA	NA	NA	NA
Hsym|HyS0001.286	QBL02596.1 biogenic amine-like GPCR [Tripedalia cystophora]	6.9e-14	7 transmembrane protein	NA	G protein-coupled receptor activity	G protein-coupled receptor signaling pathway	integral component of membrane
Hsym|HyS0001.287	XP_012563043.1 PREDICTED: uncharacterized protein LOC100201194 [Hydra vulgaris]	5.1e-36	NA	NA	NA	NA	NA
Hsym|HyS0001.288	XP_002161138.1 PREDICTED: dnaJ homolog subfamily C member 25 homolog [Hydra vulgaris]	6.2e-116	DnaJ domain containing protein 5	NA	GTP binding	protein folding	integral component of membrane
Hsym|HyS0001.289	XP_002156947.2 PREDICTED: F-box/LRR-repeat protein 12-like [Hydra vulgaris]	3.2e-70	F-box/LRR-repeat protein 12 (Fragment)	NA	NA	NA	NA
Hsym|HyS0001.290	XP_013394346.1 uncharacterized protein LOC106161835 [Lingula anatina]	1.6e-44	NA	NA	NA	NA	NA
Hsym|HyS0001.291	XP_002155519.1 PREDICTED: P2X receptor E-like [Hydra vulgaris]	3.8e-111	NA	NA	NA	NA	NA
Hsym|HyS0001.292	XP_012565920.1 PREDICTED: protein lin-7 homolog C-like [Hydra vulgaris]	3.1e-75	Putative receptor targeting protein lin-7	NA	L27 domain binding	neurotransmitter secretion	MPP7-DLG1-LIN7 complex
Hsym|HyS0001.293	RMX48658.1 hypothetical protein pdam_00018604 [Pocillopora damicornis]	1.7e-255	Glutamate receptor 3.1	NA	G protein-coupled receptor activity	G protein-coupled receptor signaling pathway	integral component of membrane
Hsym|HyS0001.295	XP_012565913.1 PREDICTED: probable zinc transporter cis4 [Hydra vulgaris]	3.1e-05	FKBP-type peptidyl-prolyl cis-trans isomerase FkpA	NA	peptidyl-prolyl cis-trans isomerase activity	protein secretion by the type IV secretion system	integral component of membrane
Hsym|HyS0001.296	XP_012561092.1 PREDICTED: uncharacterized protein LOC101240922 [Hydra vulgaris]	4.3e-08	NA	NA	NA	NA	NA
Hsym|HyS0001.297	XP_002156907.2 PREDICTED: putative glutathione-specific gamma-glutamylcyclotransferase 2 isoform X1 [Hydra vulgaris]	1.9e-49	Glutathione-specific gamma-glutamylcyclotransferase 2	CHAC2	glutathione specific gamma-glutamylcyclotransferase activity	glutathione catabolic process	cytoplasm
Hsym|HyS0001.298	XP_012559572.1 PREDICTED: uncharacterized protein LOC105845888 [Hydra vulgaris]	3.1e-51	NA	NA	NA	NA	NA
Hsym|HyS0001.299	ORX79989.1 ankyrin [Anaeromyces robustus]	7.4e-09	NA	NA	NA	NA	NA
Hsym|HyS0001.301	XP_020602818.1 myosin light polypeptide 6-like [Orbicella faveolata]	9.9e-13	NA	NA	NA	NA	NA
Hsym|HyS0001.302	XP_012553580.1 PREDICTED: D(2) dopamine receptor-like [Hydra vulgaris]	7.3e-65	G-protein coupled receptor-like protein	NA	G protein-coupled receptor activity	G protein-coupled receptor signaling pathway	integral component of membrane
Hsym|HyS0001.303	XP_002163125.3 PREDICTED: suppressor of SWI4 1 homolog [Hydra vulgaris]	1.5e-131	Peter pan	PPAN	G protein-coupled receptor activity	G protein-coupled receptor signaling pathway	preribosome, large subunit precursor
Hsym|HyS0001.304	KFM80474.1 Kynurenine--oxoglutarate transaminase 3, partial [Stegodyphus mimosarum]	4e-118	Kynurenine--oxoglutarate transaminase	KYAT3	kynurenine aminotransferase activity	L-kynurenine metabolic process	mitochondrion
Hsym|HyS0001.305	XP_012567046.1 PREDICTED: vacuolar protein sorting-associated protein 13B-like [Hydra vulgaris]	0	LOW QUALITY PROTEIN: vacuolar protein sorting-associated protein 13B	VPS13B	hydrolase activity, acting on acid anhydrides	transcription, DNA-templated	integral component of membrane
Hsym|HyS0001.306	XP_012567045.1 PREDICTED: protein-associating with the carboxyl-terminal domain of ezrin-like [Hydra vulgaris]	7.5e-108	Protein-associating with the carboxyl-terminal domain of ezrin (Fragment)	NA	NA	NA	NA
Hsym|HyS0001.307	XP_002155276.1 PREDICTED: uncharacterized protein LOC100215825 [Hydra vulgaris]	2.6e-26	NA	NA	NA	NA	NA
Hsym|HyS0001.309	XP_002162404.1 PREDICTED: ankyrin repeat domain-containing protein 66-like [Hydra vulgaris]	1e-12	Ankyrin repeat domain-containing protein 50	NA	catalytic activity	nucleoside metabolic process	NA
Hsym|HyS0001.310	XP_004208898.2 PREDICTED: L-fucose kinase-like [Hydra vulgaris]	0	LOW QUALITY PROTEIN: L-fucose kinase	FUK	transferase activity, transferring phosphorus-containing groups	GDP-L-fucose salvage	integral component of membrane
Hsym|HyS0001.311	XP_004209454.2 PREDICTED: protein SMG9-like [Hydra vulgaris]	1.8e-121	NA	NA	NA	NA	NA
Hsym|HyS0001.312	XP_020908833.1 ras-related protein Rab-6A isoform X2 [Exaiptasia pallida]	2.9e-95	Small GTP-binding protein domain	RAB41	GTPase activity	positive regulation of TORC2 signaling	Golgi apparatus
Hsym|HyS0001.313	XP_002165708.2 PREDICTED: SUMO-activating enzyme subunit 2 [Hydra vulgaris]	1.2e-220	SUMO-activating enzyme subunit	UBA2	SUMO activating enzyme activity	protein sumoylation	SUMO activating enzyme complex
Hsym|HyS0001.314	XP_002157654.2 PREDICTED: nuclear factor related to kappa-B-binding protein-like [Hydra vulgaris]	1.3e-143	Nuclear factor	NFRKB	protease binding	NA	Ino80 complex
Hsym|HyS0001.315	XP_004208490.1 PREDICTED: angiotensin-converting enzyme-like [Hydra vulgaris]	1.4e-222	Angiotensin-converting enzyme	ACE	peptidyl-dipeptidase activity	proteolysis	extracellular space
Hsym|HyS0001.317	XP_008329474.1 low density lipoprotein receptor adapter protein 1-A-like isoform X1 [Cynoglossus semilaevis]	6.6e-10	NA	NA	NA	NA	NA
Hsym|HyS0001.318	XP_022791574.1 programmed cell death protein 10-like [Stylophora pistillata]	1.1e-49	Programmed cell death protein 10	PDCD10	protein N-terminus binding	intrinsic apoptotic signaling pathway in response to hydrogen peroxide	Golgi apparatus
Hsym|HyS0001.319	XP_012563774.1 PREDICTED: uncharacterized protein LOC100201130 [Hydra vulgaris]	2.6e-44	NA	NA	NA	NA	NA
Hsym|HyS0001.320	XP_012558832.1 PREDICTED: intraflagellar transport protein 46 homolog [Hydra vulgaris]	8e-75	LOW QUALITY PROTEIN: intraflagellar transport protein 46 homolog	IFT46	NA	intraciliary transport	cilium
Hsym|HyS0001.321	XP_002158916.2 PREDICTED: CUB and zona pellucida-like domain-containing protein 1 [Hydra vulgaris]	6.7e-94	NA	NA	NA	NA	NA
Hsym|HyS0001.323	XP_002165887.2 PREDICTED: uncharacterized protein LOC100206770 [Hydra vulgaris]	0	Angiotensin-converting enzyme	ACE	peptidyl-dipeptidase activity	proteolysis	extracellular space
Hsym|HyS0001.324	XP_004208490.1 PREDICTED: angiotensin-converting enzyme-like [Hydra vulgaris]	1.9e-212	Angiotensin-converting enzyme	ACE	peptidyl-dipeptidase activity	proteolysis	extracellular space
Hsym|HyS0001.325	XP_012557891.1 PREDICTED: uncharacterized protein LOC105845088 [Hydra vulgaris]	1.6e-29	NA	NA	NA	NA	NA
Hsym|HyS0001.327	XP_012557891.1 PREDICTED: uncharacterized protein LOC105845088 [Hydra vulgaris]	8.4e-36	NA	NA	NA	NA	NA
Hsym|HyS0001.328	XP_012557891.1 PREDICTED: uncharacterized protein LOC105845088 [Hydra vulgaris]	3.9e-31	NA	NA	NA	NA	NA
Hsym|HyS0001.330	PFX18468.1 ATP-dependent DNA helicase Q1 [Stylophora pistillata]	4.3e-21	NA	NA	NA	NA	NA
Hsym|HyS0001.331	ADL39778.1 allorecognition 1 [Hydractinia symbiolongicarpus]	9e-08	NA	NA	NA	NA	NA
Hsym|HyS0001.332	RMX60302.1 hypothetical protein pdam_00017985 [Pocillopora damicornis]	3.6e-30	NA	NA	NA	NA	NA
Hsym|HyS0001.333	XP_011433936.1 PREDICTED: slit homolog 2 protein isoform X1 [Crassostrea gigas]	0.0005	NA	NA	NA	NA	NA
Hsym|HyS0001.334	XP_020896475.1 autophagy-related protein 16-1-like [Exaiptasia pallida]	2.9e-131	WD domain and G-beta repeat containing protein, putative (Fragment)	ATG16L1	myosin heavy chain kinase activity	autophagosome assembly	autophagosome membrane
Hsym|HyS0001.335	XP_012559731.1 PREDICTED: protein strawberry notch homolog 1-like [Hydra vulgaris]	0	p-loop containing nucleoside triphosphate hydrolase	NA	chromatin DNA binding	regulation of transcription, DNA-templated	nucleus
Hsym|HyS0001.337	XP_021362537.1 muscle, skeletal receptor tyrosine protein kinase-like isoform X2 [Mizuhopecten yessoensis]	1.4e-15	tissue-type plasminogen activator isoform X1	PLAT	serine-type endopeptidase activity	smooth muscle cell migration	extracellular region
Hsym|HyS0001.338	XP_002154816.3 PREDICTED: integrator complex subunit 4-like, partial [Hydra vulgaris]	1.5e-239	Integrator complex subunit	INTS4	ligand-gated ion channel activity	snRNA processing	integrator complex
Hsym|HyS0001.339	XP_012558958.1 PREDICTED: laminin subunit alpha-3-like [Hydra vulgaris]	0	Laminin subunit alpha	NA	signaling receptor binding	regulation of embryonic development	laminin complex
Hsym|HyS0001.340	XP_012558958.1 PREDICTED: laminin subunit alpha-3-like [Hydra vulgaris]	0	Laminin subunit alpha-5 (inferred by orthology to a human protein)	NA	signaling receptor binding	regulation of embryonic development	basement membrane
Hsym|HyS0001.341	XP_002162242.1 PREDICTED: very long-chain specific acyl-CoA dehydrogenase, mitochondrial-like [Hydra vulgaris]	1.3e-247	Very long-chain specific acyl-CoA dehydrogenaseserine-threonine	ACADVL	acyl-CoA dehydrogenase activity	head development	mitochondrion
Hsym|HyS0001.343	XP_012559275.1 PREDICTED: succinyl-CoA ligase [ADP-forming] subunit beta, mitochondrial-like [Hydra vulgaris]	4e-190	Succinate-CoA ligase subunit beta	SUCLA2	succinate-CoA ligase (ADP-forming) activity	tricarboxylic acid cycle	mitochondrion
Hsym|HyS0001.344	XP_002157574.3 PREDICTED: glypican-6-like [Hydra vulgaris]	2.9e-114	Glypican-6	NA	NA	regulation of signal transduction	anchored component of plasma membrane
Hsym|HyS0001.345	XP_013388522.1 indolethylamine N-methyltransferase-like [Lingula anatina]	5.1e-21	NA	NA	NA	NA	NA
Hsym|HyS0001.346	XP_002157758.1 PREDICTED: leucine-rich repeat-containing protein 40-like [Hydra vulgaris]	6.8e-76	Serine/threonine protein kinase	LRRC40	purine ribonucleoside triphosphate binding	DNA replication initiation	integral component of membrane
Hsym|HyS0001.347	XP_004206924.2 PREDICTED: neurocalcin homolog isoform X1 [Hydra vulgaris]	1.2e-72	Hippocalcin like 4	HPCAL4	calcium ion binding	signal transduction	NA
Hsym|HyS0001.349	XP_012560828.1 PREDICTED: uncharacterized protein LOC100203833 isoform X1 [Hydra vulgaris]	0	EGF-like repeat and discoidin I-like domain-containing protein 3	NA	catalase activity	cellular oxidant detoxification	integral component of membrane
Hsym|HyS0001.350	XP_026571371.1 contactin-2 [Pseudonaja textilis]	5.8e-30	NA	NA	NA	NA	NA
Hsym|HyS0001.355	XP_002153972.1 PREDICTED: alkyldihydroxyacetonephosphate synthase, peroxisomal-like [Hydra vulgaris]	1.2e-295	Alkylglycerone-phosphate synthase	AGPS	alkylglycerone-phosphate synthase activity	ether lipid biosynthetic process	peroxisome
Hsym|HyS0001.356	XP_015761491.1 PREDICTED: uncharacterized protein LOC107340638 [Acropora digitifera]	7.9e-21	NA	NA	NA	NA	NA
Hsym|HyS0001.357	XP_012554650.1 PREDICTED: chymotrypsin-like elastase family member 2A [Hydra vulgaris]	2.9e-60	NA	NA	NA	NA	NA
Hsym|HyS0001.361	XP_002599290.1 hypothetical protein BRAFLDRAFT_64352 [Branchiostoma floridae]	7.9e-87	NA	NA	NA	NA	NA
Hsym|HyS0001.362	XP_012554117.1 PREDICTED: lysine histidine transporter-like 4 [Hydra vulgaris]	1.6e-25	NA	NA	NA	NA	NA
Hsym|HyS0001.365	XP_002163229.1 PREDICTED: eukaryotic initiation factor 4A-I-like [Hydra vulgaris]	7.6e-193	Eukaryotic translation initiation factor 4A	NA	helicase activity	translational initiation	cytoplasmic stress granule
Hsym|HyS0001.366	XP_012565456.1 PREDICTED: uncharacterized protein LOC100198017 [Hydra vulgaris]	1.8e-192	NA	NA	NA	NA	NA
Hsym|HyS0001.367	XP_012565456.1 PREDICTED: uncharacterized protein LOC100198017 [Hydra vulgaris]	2.8e-43	NA	NA	NA	NA	NA
Hsym|HyS0001.369	XP_002168273.2 PREDICTED: fibropellin-1-like isoform X1 [Hydra vulgaris]	3.4e-121	Sushi, von Willebrand factor type A, EGF and pentraxin domain-containing protein 1	NA	calcium ion binding	Notch signaling pathway	extracellular region
Hsym|HyS0001.370	XP_002166391.2 PREDICTED: serine/threonine-protein phosphatase 2A regulatory subunit B'' subunit beta-like [Hydra vulgaris]	2.7e-164	Serine/threonine-protein phosphatase 2A regulatory subunit B'' subunit alpha	PPP2R3A	calcium ion binding	regulation of phosphoprotein phosphatase activity	protein phosphatase type 2A complex
Hsym|HyS0001.371	XP_004207977.1 PREDICTED: uncharacterized protein LOC101238690 [Hydra vulgaris]	1.3e-13	NA	NA	NA	NA	NA
Hsym|HyS0001.372	EKC41779.1 hypothetical protein CGI_10021646 [Crassostrea gigas]	9.4e-06	NA	NA	NA	NA	NA
Hsym|HyS0001.373	XP_002160295.1 PREDICTED: soma ferritin-like [Hydra vulgaris]	6.5e-61	Soma ferritin	NA	ferroxidase activity	cellular iron ion homeostasis	cell
Hsym|HyS0001.374	XP_012554651.1 PREDICTED: TBC1 domain family member 23-like [Hydra vulgaris]	0	Rab-GAP TBC domain-containing protein (Fragment)	TBC1D23	protein binding	retrograde transport, endosome to Golgi	cytosol
Hsym|HyS0001.375	XP_012556960.1 PREDICTED: protein FAM63B-like [Hydra vulgaris]	8.5e-118	LOW QUALITY PROTEIN: ubiquitin carboxyl-terminal hydrolase MINDY-2	MINDY2	Lys48-specific deubiquitinase activity	protein K48-linked deubiquitination	nucleoplasm
Hsym|HyS0001.376	XP_012557072.1 PREDICTED: WASH complex subunit FAM21C-like [Hydra vulgaris]	3.5e-46	WASH complex subunit 2	NA	NA	retrograde transport, endosome to Golgi	early endosome membrane
Hsym|HyS0001.378	KXJ15057.1 WASH complex subunit FAM21 [Exaiptasia pallida]	4.2e-12	NA	NA	NA	NA	NA
Hsym|HyS0001.379	XP_002165148.1 PREDICTED: uncharacterized protein LOC100208428 [Hydra vulgaris]	1.9e-37	C2H2-type domain-containing protein	NA	nucleic acid binding	NA	NA
Hsym|HyS0001.381	AFU11398.1 allorecognition 2, partial [Hydractinia symbiolongicarpus]	0.00011	NA	NA	NA	NA	NA
Hsym|HyS0001.382	XP_012559682.1 PREDICTED: uncharacterized protein LOC105845947 [Hydra vulgaris]	6.1e-13	NA	NA	NA	NA	NA
Hsym|HyS0001.383	XP_002166541.1 PREDICTED: uncharacterized protein LOC100215670 [Hydra vulgaris]	8.8e-13	NA	NA	NA	NA	NA
Hsym|HyS0001.384	XP_012557938.1 PREDICTED: uncharacterized protein LOC105845107 [Hydra vulgaris]	9.2e-100	NA	NA	NA	NA	NA
Hsym|HyS0001.385	XP_004207673.1 PREDICTED: zinc finger protein 236-like [Hydra vulgaris]	6e-121	Gonadotropin inducible ovarian transcription factor 2 beta	NA	nucleic acid binding	regulation of transcription, DNA-templated	nucleus
Hsym|HyS0001.386	WP_062125737.1 hypothetical protein [Geofilum rubicundum]	5e-10	NA	NA	NA	NA	NA
Hsym|HyS0001.387	XP_004211286.2 PREDICTED: neuropeptide Y receptor type 6-like [Hydra vulgaris]	2.3e-78	Pyroglutamylated RFamide peptide receptor	NA	G protein-coupled receptor activity	G protein-coupled receptor signaling pathway	integral component of membrane
Hsym|HyS0001.388	XP_002155693.3 PREDICTED: tigger transposable element-derived protein 4-like [Hydra vulgaris]	5.7e-07	NA	NA	NA	NA	NA
Hsym|HyS0001.389	XP_012557067.1 PREDICTED: protein ZINC INDUCED FACILITATOR-LIKE 1-like [Hydra vulgaris]	3e-79	NA	NA	NA	NA	NA
Hsym|HyS0001.390	XP_012557067.1 PREDICTED: protein ZINC INDUCED FACILITATOR-LIKE 1-like [Hydra vulgaris]	5.2e-82	NA	NA	NA	NA	NA
Hsym|HyS0001.391	XP_012557067.1 PREDICTED: protein ZINC INDUCED FACILITATOR-LIKE 1-like [Hydra vulgaris]	7.7e-13	NA	NA	NA	NA	NA
Hsym|HyS0001.392	PFX17680.1 hypothetical protein AWC38_SpisGene17985 [Stylophora pistillata]	1.1e-09	NA	NA	NA	NA	NA
Hsym|HyS0001.393	XP_012553886.1 PREDICTED: protein ZINC INDUCED FACILITATOR-LIKE 1-like isoform X1 [Hydra vulgaris]	3.3e-41	MFS domain-containing protein	NA	transmembrane transporter activity	transmembrane transport	integral component of plasma membrane
Hsym|HyS0001.394	XP_012557067.1 PREDICTED: protein ZINC INDUCED FACILITATOR-LIKE 1-like [Hydra vulgaris]	4e-85	NA	NA	NA	NA	NA
Hsym|HyS0001.395	XP_012557067.1 PREDICTED: protein ZINC INDUCED FACILITATOR-LIKE 1-like [Hydra vulgaris]	9.1e-83	MFS domain-containing protein	NA	transmembrane transporter activity	transmembrane transport	integral component of plasma membrane
Hsym|HyS0001.396	XP_002670397.1 predicted protein [Naegleria gruberi]	6.8e-39	NA	NA	NA	NA	NA
Hsym|HyS0001.397	RNA13468.1 hypothetical protein BpHYR1_012004 [Brachionus plicatilis]	2.1e-65	Membrane-associated protein, putative	NA	NA	NA	integral component of membrane
Hsym|HyS0001.398	XP_012555700.1 PREDICTED: ankyrin repeat and SAM domain-containing protein 3-like [Hydra vulgaris]	3.2e-67	Ankyrin repeat and SAM domain-containing protein 3	NA	catalytic activity	nucleoside metabolic process	NA
Hsym|HyS0001.399	XP_004206331.2 PREDICTED: protein Flattop homolog isoform X2 [Hydra vulgaris]	4e-24	Cilia and flagella associated protein 126	CFAP126	NA	cilium organization	ciliary basal body
Hsym|HyS0001.400	XP_012565328.1 PREDICTED: eukaryotic translation initiation factor 2A-like [Hydra vulgaris]	1.5e-178	Eukaryotic translation initiation factor 2A	EIF2A	translation initiation factor activity	translational initiation	eukaryotic translation initiation factor 2 complex
Hsym|HyS0001.401	XP_012556020.1 PREDICTED: uncharacterized protein LOC105844209 [Hydra vulgaris]	6e-42	NA	NA	NA	NA	NA
Hsym|HyS0001.402	XP_002160322.1 PREDICTED: splicing factor 3B subunit 6-like [Hydra vulgaris]	2.2e-58	Pre-mRNA branch site protein p14	SF3B6	RNA binding	blastocyst formation	U12-type spliceosomal complex
Hsym|HyS0001.403	XP_012563184.1 PREDICTED: cohesin subunit SA-2-like isoform X1 [Hydra vulgaris]	0	Stromal antigen	NA	chromatin binding	sister chromatid cohesion	cohesin complex
Hsym|HyS0001.404	XP_012563433.1 PREDICTED: uncharacterized protein LOC105848048 [Hydra vulgaris]	1.5e-120	NA	NA	NA	NA	NA
Hsym|HyS0001.405	XP_002157809.3 PREDICTED: phosphatidylinositol 4,5-bisphosphate 3-kinase catalytic subunit beta isoform-like [Hydra vulgaris]	0	Phosphatidylinositol 4,5-bisphosphate 3-kinase catalytic subunit	PIK3CD	1-phosphatidylinositol-3-kinase activity	phosphatidylinositol-3-phosphate biosynthetic process	phosphatidylinositol 3-kinase complex
Hsym|HyS0001.406	XP_012563135.1 PREDICTED: pre-mRNA-splicing factor 38B-like [Hydra vulgaris]	1.5e-27	Arginine/serine-rich coiled-coil protein 2	NA	mRNA binding	mRNA splice site selection	U1 snRNP
Hsym|HyS0001.407	XP_002157540.1 PREDICTED: ADP-ribosylation factor-like [Hydra vulgaris]	6.1e-84	ADP ribosylation factor	NA	GTP binding	male meiosis cytokinesis	cell division site part
Hsym|HyS0001.408	XP_012556577.1 PREDICTED: DNA fragmentation factor subunit beta-like [Hydra vulgaris]	2.4e-107	Caspase-activated deoxyribonuclease	DFFB	deoxyribonuclease activity	apoptotic DNA fragmentation	nucleus
Hsym|HyS0001.409	XP_012564616.1 PREDICTED: diphosphomevalonate decarboxylase-like isoform X1 [Hydra vulgaris]	4.3e-32	NA	NA	NA	NA	NA
Hsym|HyS0001.411	XP_028398201.1 nicolin-1-like [Dendronephthya gigantea]	1.5e-14	NA	NA	NA	NA	NA
Hsym|HyS0001.412	XP_020624688.1 SCL-interrupting locus protein-like [Orbicella faveolata]	2.9e-66	NA	NA	NA	NA	NA
Hsym|HyS0001.413	XP_012558617.1 PREDICTED: LOW QUALITY PROTEIN: elongation factor G, mitochondrial-like [Hydra vulgaris]	1.2e-292	Elongation factor G, mitochondrial	GFM1	translation elongation factor activity	mitochondrial translational elongation	mitochondrion
Hsym|HyS0001.415	XP_012566917.1 PREDICTED: E3 SUMO-protein ligase RanBP2-like [Hydra vulgaris]	0	RAN binding protein 2	NA	peptidyl-prolyl cis-trans isomerase activity	intracellular transport	nuclear pore
Hsym|HyS0001.416	XP_028413986.1 uncharacterized protein LOC114536845 [Dendronephthya gigantea]	2.4e-05	NA	NA	NA	NA	NA
Hsym|HyS0001.417	XP_012566917.1 PREDICTED: E3 SUMO-protein ligase RanBP2-like [Hydra vulgaris]	1.4e-110	Ran-specific gtpase-activating	NA	metal ion binding	intracellular transport	cell
Hsym|HyS0001.418	XP_020603691.1 ficolin-1-like [Orbicella faveolata]	1.1e-07	NA	NA	NA	NA	NA
Hsym|HyS0001.419	XP_020791822.1 low choriolytic enzyme-like [Boleophthalmus pectinirostris]	7.9e-26	Metalloendopeptidase	NA	metalloendopeptidase activity	proteolysis	integral component of membrane
Hsym|HyS0001.420	XP_002168348.3 PREDICTED: protein EMSY-like [Hydra vulgaris]	1e-176	Nucleosome-remodeling factor subunit BPTF	NA	NA	regulation of transcription, DNA-templated	NA
Hsym|HyS0001.421	CAJ65508.1 Dickkopf 1/2/4-A protein [Hydra vulgaris]	8e-08	NA	NA	NA	NA	NA
Hsym|HyS0001.422	XP_002162791.3 PREDICTED: intraflagellar transport protein 81 homolog [Hydra vulgaris]	9.8e-238	MORN repeat-containing protein 3	IFT81	tubulin binding	intraciliary transport	intraciliary transport particle B
Hsym|HyS0001.423	XP_022791969.1 sodium/potassium/calcium exchanger 1-like isoform X5 [Stylophora pistillata]	5.6e-136	Testis potassium dependent sodium/calcium exchanger	SLC24A4B	calcium, potassium:sodium antiporter activity	sodium ion transmembrane transport	integral component of plasma membrane
Hsym|HyS0001.424	XP_012560333.1 PREDICTED: serine/threonine-protein kinase mig-15-like [Hydra vulgaris]	0	Mitogen-activated protein kinase kinase kinase kinase	NA	protein kinase activity	protein phosphorylation	cell cortex
Hsym|HyS0001.425	XP_027047674.1 LOW QUALITY PROTEIN: selenoprotein T2-like [Pocillopora damicornis]	4.7e-23	Selenoprotein T	NA	thioredoxin-disulfide reductase activity	cellular oxidant detoxification	endoplasmic reticulum membrane
Hsym|HyS0001.426	XP_015754793.1 PREDICTED: uncharacterized protein LOC107334380 [Acropora digitifera]	1.6e-18	NA	NA	NA	NA	NA
Hsym|HyS0001.427	XP_012563701.1 PREDICTED: somatostatin receptor type 5-like [Hydra vulgaris]	6.5e-35	NA	NA	NA	NA	NA
Hsym|HyS0001.428	XP_022322580.1 DNA-directed RNA polymerases I, II, and III subunit RPABC3-like [Crassostrea virginica]	1.8e-67	DNA-directed RNA polymerases I, II, and III subunit RPABC3	POLR2H	DNA-directed 5'-3' RNA polymerase activity	transcription by RNA polymerase III	RNA polymerase I complex
Hsym|HyS0001.429	XP_012564637.1 PREDICTED: formin-J-like [Hydra vulgaris]	3.6e-162	NA	NA	NA	NA	NA
Hsym|HyS0001.430	KXJ19982.1 V(D)J recombination activating protein 1 [Exaiptasia pallida]	1.2e-31	NA	NA	NA	NA	NA
Hsym|HyS0001.431	AOF43145.1 histone H2B.6 [Hydractinia echinata]	2.5e-40	NA	NA	NA	NA	NA
Hsym|HyS0001.432	AOF43149.1 histone H2B.2 [Hydractinia echinata]	6.1e-29	Histone domain-containing protein	NA	protein heterodimerization activity	nucleosome assembly	nucleosome
Hsym|HyS0001.433	AOF43145.1 histone H2B.6 [Hydractinia echinata]	1.9e-40	NA	NA	NA	NA	NA
Hsym|HyS0001.435	XP_027040524.1 dynein beta chain, flagellar outer arm-like [Pocillopora damicornis]	0	NA	NA	NA	NA	NA
Hsym|HyS0001.436	RMX48605.1 hypothetical protein pdam_00008031 [Pocillopora damicornis]	6.2e-36	Dynein beta chain, ciliary	NA	microtubule motor activity	microtubule-based movement	dynein complex
Hsym|HyS0001.437	XP_002156278.2 PREDICTED: uncharacterized protein LOC100206161 [Hydra vulgaris]	6.7e-39	Ribonuclease P protein subunit p38	NA	zinc ion binding	NA	NA
Hsym|HyS0001.438	XP_020899516.1 uncharacterized protein LOC110238212 [Exaiptasia pallida]	7.4e-20	NA	NA	NA	NA	NA
Hsym|HyS0001.439	XP_020899516.1 uncharacterized protein LOC110238212 [Exaiptasia pallida]	8.5e-14	NA	NA	NA	NA	NA
Hsym|HyS0001.441	XP_002154994.2 PREDICTED: uncharacterized protein LOC100203209 [Hydra vulgaris]	1.1e-28	NA	NA	NA	NA	NA
Hsym|HyS0001.442	XP_012555432.1 PREDICTED: DCN1-like protein 1 [Hydra vulgaris]	2.5e-117	Defective in cullin neddylation protein (Fragment)	NA	cullin family protein binding	positive regulation of protein modification by small protein conjugation or removal	ubiquitin ligase complex
Hsym|HyS0001.443	XP_012554379.1 PREDICTED: sodium/hydrogen exchanger 9-like [Hydra vulgaris]	4.1e-209	Sodium/hydrogen exchanger	SLC9A6	sodium:proton antiporter activity	regulation of pH	axonal spine
Hsym|HyS0001.444	XP_015753446.1 PREDICTED: potassium voltage-gated channel subfamily A member 1-like [Acropora digitifera]	1.9e-71	Voltage-gated potassium channel	NA	voltage-gated potassium channel activity	protein homooligomerization	voltage-gated potassium channel complex
Hsym|HyS0001.445	XP_012554334.1 PREDICTED: mediator of RNA polymerase II transcription subunit 12-like protein [Hydra vulgaris]	0	PKS-NRPS hybrid synthetase	NA	transcription coregulator activity	regulation of transcription by RNA polymerase II	mediator complex
Hsym|HyS0001.446	XP_012566013.1 PREDICTED: tetraspanin-6-like [Hydra vulgaris]	4.3e-71	Tetraspanin	NA	protein kinase activity	protein phosphorylation	integral component of membrane
Hsym|HyS0001.447	XP_022801821.1 uncharacterized protein LOC111339432 [Stylophora pistillata]	5.6e-64	NA	NA	NA	NA	NA
Hsym|HyS0001.448	XP_022801821.1 uncharacterized protein LOC111339432 [Stylophora pistillata]	1e-41	NA	NA	NA	NA	NA
Hsym|HyS0001.449	XP_002164102.1 PREDICTED: synaptonemal complex protein 1-like [Hydra vulgaris]	0.00015	NA	NA	NA	NA	NA
Hsym|HyS0001.450	XP_027059719.1 platelet-activating factor acetylhydrolase IB subunit gamma-like isoform X1 [Pocillopora damicornis]	3.3e-65	platelet-activating factor acetylhydrolase IB subunit gamma	PAFAH1B3	identical protein binding	spermatogenesis	cytoplasm
Hsym|HyS0001.451	XP_012559422.1 PREDICTED: MORN repeat-containing protein 4-like [Hydra vulgaris]	4.3e-06	Phosphatidylinositol phosphate kinase	NA	1-phosphatidylinositol-4-phosphate 5-kinase activity	phosphatidylinositol phosphorylation	integral component of membrane
Hsym|HyS0001.452	XP_002155485.3 PREDICTED: protein UBASH3A homolog [Hydra vulgaris]	3.6e-153	ubiquitin-associated and SH3 domain-containing protein B	NA	phosphoglycerate mutase activity	negative regulation of T cell receptor signaling pathway	Golgi apparatus
Hsym|HyS0001.454	ALY05315.1 boule-like-1a [Clytia hemisphaerica]	7.1e-29	NA	NA	NA	NA	NA
Hsym|HyS0001.455	XP_012561445.1 PREDICTED: hormone-sensitive lipase-like [Hydra vulgaris]	1.3e-148	Hormone-sensitive lipase a	NA	lipase activity	cholesterol metabolic process	lipid droplet
Hsym|HyS0001.456	XP_002160201.2 PREDICTED: rhomboid-related protein 4-like [Hydra vulgaris]	8.8e-77	Rhomboid domain-containing protein 1	RHBDD1	serine-type endopeptidase activity	membrane protein proteolysis involved in retrograde protein transport, ER to cytosol	endoplasmic reticulum quality control compartment
Hsym|HyS0001.457	XP_012558855.1 PREDICTED: dynein assembly factor with WDR repeat domains 1-like [Hydra vulgaris]	1.6e-60	Dynein assembly factor with WDR repeat domains 1	DAW1	calcium ion binding	cerebrospinal fluid circulation	cilium
Hsym|HyS0001.458	XP_021374065.1 glutathione reductase, mitochondrial-like [Mizuhopecten yessoensis]	3.2e-166	Glutathione-disulfide reductase	NA	glutathione-disulfide reductase activity	glutathione metabolic process	cytoplasm
Hsym|HyS0001.459	XP_028418521.1 uncharacterized protein LOC114543926 [Dendronephthya gigantea]	1.4e-43	NA	NA	NA	NA	NA
Hsym|HyS0001.460	KXJ14702.1 hypothetical protein AC249_AIPGENE5021 [Exaiptasia pallida]	3.8e-73	OTU domain-containing protein	NA	NA	NA	NA
Hsym|HyS0001.461	KXJ24421.1 hypothetical protein AC249_AIPGENE22574 [Exaiptasia pallida]	8e-24	NA	NA	NA	NA	NA
Hsym|HyS0001.462	XP_021353498.1 peroxisomal biogenesis factor 19-like [Mizuhopecten yessoensis]	7.2e-32	Peroxisomal biogenesis factor 19	PEX19	NA	NA	peroxisome
Hsym|HyS0001.463	XP_002167927.3 PREDICTED: Bloom syndrome protein homolog [Hydra vulgaris]	8.8e-260	ATP-dependent DNA helicase	BLM	3'-5' DNA helicase activity	DNA duplex unwinding	nucleus
Hsym|HyS0001.466	XP_012556761.1 PREDICTED: zinc transporter ZIP1-like [Hydra vulgaris]	4.2e-41	Putative zinc/iron transporter (inferred by orthology to a S. mansoni protein)	NA	metal ion transmembrane transporter activity	metal ion transport	integral component of membrane
Hsym|HyS0001.467	XP_012556759.1 PREDICTED: transforming growth factor beta regulator 1-like [Hydra vulgaris]	1.1e-115	Transforming growth factor beta regulator	TBRG1	protein binding	protein localization to nucleoplasm	nucleus
Hsym|HyS0001.468	XP_022789269.1 piggyBac transposable element-derived protein 4-like [Stylophora pistillata]	1.2e-14	NA	NA	NA	NA	NA
Hsym|HyS0001.469	XP_002157212.3 PREDICTED: uncharacterized protein LOC100208944 [Hydra vulgaris]	2.5e-07	NA	NA	NA	NA	NA
Hsym|HyS0001.470	XP_002157212.3 PREDICTED: uncharacterized protein LOC100208944 [Hydra vulgaris]	9.6e-20	NA	NA	NA	NA	NA
Hsym|HyS0001.472	XP_002161168.2 PREDICTED: protein spire homolog 1-like [Hydra vulgaris]	1.9e-110	NA	NA	NA	NA	NA
Hsym|HyS0001.474	XP_002161830.1 PREDICTED: signal recognition particle receptor subunit alpha homolog isoform X2 [Hydra vulgaris]	1.1e-252	Signal recognition particle receptor subunit alpha	NA	signal recognition particle binding	SRP-dependent cotranslational protein targeting to membrane	signal recognition particle receptor complex
Hsym|HyS0001.475	PFX20049.1 GPI mannosyltransferase 1 [Stylophora pistillata]	2.7e-100	GPI mannosyltransferase 1	NA	fucosyltransferase activity	fucosylation	Golgi cisterna membrane
Hsym|HyS0001.476	XP_012564760.1 PREDICTED: 2-acylglycerol O-acyltransferase 2-A-like, partial [Hydra vulgaris]	2.1e-86	EF-hand calcium-binding domain-containing protein 6	MOGAT1	transferase activity, transferring acyl groups other than amino-acyl groups	diacylglycerol biosynthetic process	endoplasmic reticulum
Hsym|HyS0001.477	XP_004212054.2 PREDICTED: eukaryotic translation initiation factor 4E type 2-like [Hydra vulgaris]	1.9e-106	Eukaryotic translation initiation factor 4E member 2	EIF4E2	translation initiation factor activity	translational initiation	cytoplasm
Hsym|HyS0001.478	XP_012560154.1 PREDICTED: rho guanine nucleotide exchange factor 11-like [Hydra vulgaris]	0	Leukemia-associated Rho guanine nucleotide exchange factor	ARHGEF12	Rho guanyl-nucleotide exchange factor activity	regulation of Rho protein signal transduction	cytoplasm
Hsym|HyS0001.480	XP_002165676.2 PREDICTED: histone acetyltransferase KAT7-like [Hydra vulgaris]	2.9e-174	Histone acetyltransferase	NA	histone acetyltransferase activity	histone acetylation	nucleus
Hsym|HyS0001.481	XP_002165248.3 PREDICTED: pleckstrin homology-like domain family B member 1 [Hydra vulgaris]	4.2e-233	Pleckstrin homology like domain family B member 1	NA	microtubule motor activity	microtubule-based movement	NA
Hsym|HyS0001.482	XP_002165248.3 PREDICTED: pleckstrin homology-like domain family B member 1 [Hydra vulgaris]	6.1e-62	Pleckstrin domain family B member 1	NA	NA	NA	integral component of membrane
Hsym|HyS0001.483	RMX42753.1 hypothetical protein pdam_00014147, partial [Pocillopora damicornis]	3.6e-60	NA	NA	NA	NA	NA
Hsym|HyS0001.484	XP_020906812.1 cyclic GMP-AMP synthase-like [Exaiptasia pallida]	6.6e-33	NA	NA	NA	NA	NA
Hsym|HyS0001.485	XP_004207937.1 PREDICTED: 39S ribosomal protein L41-A, mitochondrial-like [Hydra vulgaris]	4.7e-35	Mitochondrial ribosomal protein of the large subunit	RM41	structural constituent of ribosome	translation	mitochondrial large ribosomal subunit
Hsym|HyS0001.486	XP_012556753.1 PREDICTED: putative glycerol kinase 5 [Hydra vulgaris]	2e-153	Transcription factor Dp-2	NA	phosphotransferase activity, alcohol group as acceptor	carbohydrate metabolic process	transcription factor complex
Hsym|HyS0001.487	XP_002161093.1 PREDICTED: run domain Beclin-1 interacting and cysteine-rich containing protein-like [Hydra vulgaris]	3.2e-207	Rubicon autophagy regulator	RUBCN	NA	negative regulation of phosphatidylinositol 3-kinase activity	early endosome
Hsym|HyS0001.488	XP_012556020.1 PREDICTED: uncharacterized protein LOC105844209 [Hydra vulgaris]	1.2e-81	NA	NA	NA	NA	NA
Hsym|HyS0001.489	XP_012558898.1 PREDICTED: uncharacterized protein LOC105845559, partial [Hydra vulgaris]	6.9e-110	NA	NA	NA	NA	NA
Hsym|HyS0001.490	XP_012556020.1 PREDICTED: uncharacterized protein LOC105844209 [Hydra vulgaris]	9.9e-98	NA	NA	NA	NA	NA
Hsym|HyS0001.491	XP_012556020.1 PREDICTED: uncharacterized protein LOC105844209 [Hydra vulgaris]	2.3e-84	NA	NA	NA	NA	NA
Hsym|HyS0001.492	XP_012556020.1 PREDICTED: uncharacterized protein LOC105844209 [Hydra vulgaris]	6.3e-84	NA	NA	NA	NA	NA
Hsym|HyS0001.493	XP_012556020.1 PREDICTED: uncharacterized protein LOC105844209 [Hydra vulgaris]	4.7e-48	NA	NA	NA	NA	NA
Hsym|HyS0001.494	XP_027037232.1 N-alpha-acetyltransferase 50-like [Pocillopora damicornis]	4.3e-71	N-acetyltransferase	NA	N-acetyltransferase activity	mitotic sister chromatid cohesion	NatA complex
Hsym|HyS0001.495	XP_022104026.1 uncharacterized protein LOC110986459 isoform X1 [Acanthaster planci]	2.2e-123	Amino-acid dehydrogenase	NA	oxidoreductase activity, acting on the CH-NH2 group of donors, NAD or NADP as acceptor	cellular amino acid metabolic process	integral component of membrane
Hsym|HyS0001.496	ELT97716.1 hypothetical protein CAPTEDRAFT_167823 [Capitella teleta]	3.3e-113	Down syndrome critical region protein A	NA	NA	intracellular protein transport	endosome
Hsym|HyS0001.497	XP_012553771.1 PREDICTED: mitochondrial intermediate peptidase-like [Hydra vulgaris]	1.5e-252	Mitochondrial intermediate peptidase	MIPEP	metalloendopeptidase activity	proteolysis	mitochondrion
Hsym|HyS0001.498	XP_002158873.2 PREDICTED: lysosome-associated membrane glycoprotein 1-like [Hydra vulgaris]	4.9e-12	Lysosome-associated membrane glycoprotein 2	LAMP1	enzyme binding	lysosomal transport	lysosomal membrane
Hsym|HyS0001.499	XP_015599678.1 uncharacterized protein LOC107269857 [Cephus cinctus]	5e-05	NA	NA	NA	NA	NA
Hsym|HyS0001.500	XP_010747566.3 alpha-1,3-mannosyl-glycoprotein 4-beta-N-acetylglucosaminyltransferase C [Larimichthys crocea]	8.3e-17	NA	NA	NA	NA	NA
Hsym|HyS0001.501	XP_028393957.1 uncharacterized protein LOC114518207 isoform X1 [Dendronephthya gigantea]	2.5e-80	Acidic endochitinase	NA	polysaccharide binding	carbohydrate metabolic process	extracellular region
Hsym|HyS0001.502	XP_004212434.2 PREDICTED: uncharacterized protein LOC101241095, partial [Hydra vulgaris]	7.5e-91	NA	NA	NA	NA	NA
Hsym|HyS0001.503	XP_012558898.1 PREDICTED: uncharacterized protein LOC105845559, partial [Hydra vulgaris]	3.1e-108	NA	NA	NA	NA	NA
Hsym|HyS0001.504	PFX19597.1 Titin [Stylophora pistillata]	2.7e-30	NA	NA	NA	NA	NA
Hsym|HyS0001.505	XP_004212434.2 PREDICTED: uncharacterized protein LOC101241095, partial [Hydra vulgaris]	9.8e-76	NA	NA	NA	NA	NA
Hsym|HyS0001.506	XP_002168308.3 PREDICTED: peroxisomal biogenesis factor 6-like [Hydra vulgaris]	2.9e-196	Cell cycle exit and neuronal differentiation protein 1	PEX6	ATP binding	protein import into peroxisome matrix	peroxisome
Hsym|HyS0001.507	XP_002168321.2 PREDICTED: ubiquitin-conjugating enzyme E2-22 kDa-like [Hydra vulgaris]	3e-89	Ubiquitin protein ligase	NA	ATP binding	protein ubiquitination	nucleus
Hsym|HyS0001.508	XP_012562243.1 PREDICTED: uncharacterized protein LOC100200428 [Hydra vulgaris]	5.9e-114	NA	NA	NA	NA	NA
Hsym|HyS0001.509	XP_002167902.2 PREDICTED: uncharacterized protein LOC100203174 [Hydra vulgaris]	6.8e-106	NA	NA	NA	NA	NA
Hsym|HyS0001.510	PFX34042.1 Phosphatidylinositol-glycan-specific phospholipase D [Stylophora pistillata]	3.4e-160	Glycosylphosphatidylinositol-specific phospholipase D	GPLD1	glycosylphosphatidylinositol phospholipase D activity	GPI anchor release	extracellular region
Hsym|HyS0001.511	XP_004211264.1 PREDICTED: beta-1,3-galactosyltransferase 1-like [Hydra vulgaris]	1.1e-68	Hexosyltransferase	NA	galactosyltransferase activity	protein glycosylation	Golgi membrane
Hsym|HyS0001.512	XP_004211422.2 PREDICTED: N-acetyllactosaminide beta-1,3-N-acetylglucosaminyltransferase 2-like, partial [Hydra vulgaris]	8.6e-57	Hexosyltransferase	NA	galactosyltransferase activity	protein glycosylation	Golgi apparatus
Hsym|HyS0001.513	XP_004211264.1 PREDICTED: beta-1,3-galactosyltransferase 1-like [Hydra vulgaris]	4.7e-51	Hexosyltransferase	NA	galactosyltransferase activity	protein glycosylation	Golgi apparatus
Hsym|HyS0001.514	XP_012554747.1 PREDICTED: protein EFR3 homolog B-like [Hydra vulgaris]	1.2e-274	Lck-interacting transmembrane adapter 1	EFR3BA	NA	protein localization to plasma membrane	cytosol
Hsym|HyS0001.515	XP_028401480.1 dixin-like isoform X1 [Dendronephthya gigantea]	3.6e-60	Calponin-homology (CH) domain-containing protein (Fragment)	DIXDC1	actin binding	Wnt signaling pathway	cytosol
Hsym|HyS0001.516	XP_002154415.1 PREDICTED: beta-amyloid-like protein [Hydra vulgaris]	3.7e-183	BPTI/Kunitz inhibitor domain-containing protein (Fragment)	APP	heparin binding	nervous system development	nuclear envelope lumen
Hsym|HyS0001.517	XP_012554382.1 PREDICTED: FERM, RhoGEF and pleckstrin domain-containing protein 2-like [Hydra vulgaris]	5.8e-300	FERM, RhoGEF and pleckstrin domain-containing protein 2	FARP2	Rho guanyl-nucleotide exchange factor activity	regulation of Rho protein signal transduction	cytoskeleton
Hsym|HyS0001.518	XP_018408062.1 PREDICTED: homeobox protein PKNOX2 isoform X1 [Nanorana parkeri]	2.4e-64	Homeobox protein pknox	PKNOX2	actin monomer binding	regulation of transcription, DNA-templated	nucleus
Hsym|HyS0001.520	XP_012563035.1 PREDICTED: uncharacterized protein C19orf44-like [Hydra vulgaris]	1.1e-43	NA	NA	NA	NA	NA
Hsym|HyS0001.521	XP_002155626.1 PREDICTED: vesicular glutamate transporter 3-like [Hydra vulgaris]	1.3e-205	Vesicular glutamate transporter	NA	transmembrane transporter activity	transmembrane transport	integral component of plasma membrane
Hsym|HyS0001.522	XP_012559074.1 PREDICTED: homeobox protein 2-like isoform X1 [Hydra vulgaris]	5.1e-55	Ligand-binding protein SH3	NA	NA	cell redox homeostasis	cell
Hsym|HyS0001.523	XP_002157476.2 PREDICTED: testis-specific serine/threonine-protein kinase 3-like [Hydra vulgaris]	3e-130	Testis-specific serine/threonine-protein kinase	TSSK1B	protein serine/threonine kinase activity	protein phosphorylation	motile cilium
Hsym|HyS0001.524	XP_012554383.1 PREDICTED: rho guanine nucleotide exchange factor 7-like [Hydra vulgaris]	4.4e-241	Rho guanine nucleotide exchange factor 7	ARHGEF7	Rho guanyl-nucleotide exchange factor activity	regulation of Rho protein signal transduction	lamellipodium
Hsym|HyS0001.525	XP_015752309.1 PREDICTED: 26S protease regulatory subunit 6B [Acropora digitifera]	9.2e-194	26S protease regulatory subunit	NA	proteasome-activating ATPase activity	positive regulation of proteasomal protein catabolic process	proteasome complex
Hsym|HyS0001.526	XP_002164131.1 PREDICTED: golgin-45-like [Hydra vulgaris]	4.2e-79	Basic leucine zipper nuclear factor 1(Blzf1) protein, putative	NA	3-hydroxyisobutyryl-CoA hydrolase activity	Golgi to plasma membrane protein transport	Golgi membrane
Hsym|HyS0001.527	XP_002164207.2 PREDICTED: conserved oligomeric Golgi complex subunit 3-like isoform X1 [Hydra vulgaris]	0	Component of oligomeric golgi complex 3	COG3	NA	intracellular protein transport	cis-Golgi network
Hsym|HyS0001.528	XP_020603222.1 macrophage receptor MARCO-like isoform X3 [Orbicella faveolata]	7.9e-05	NA	NA	NA	NA	NA
Hsym|HyS0001.529	XP_002164714.2 PREDICTED: probable ATP-dependent RNA helicase DDX6 [Hydra vulgaris]	1.9e-218	DEAD-box ATP-dependent RNA helicase	NA	helicase activity	stress granule assembly	cytoplasmic ribonucleoprotein granule
Hsym|HyS0001.530	XP_012555030.1 PREDICTED: AP-1 complex subunit sigma-2-like [Hydra vulgaris]	4.5e-72	AP complex subunit sigma	NA	clathrin adaptor activity	vesicle-mediated transport	membrane coat
Hsym|HyS0001.531	XP_002162097.2 PREDICTED: E3 ubiquitin-protein ligase RNF13-like [Hydra vulgaris]	7.6e-79	Membrane-associated guanylate kinase, WW and PDZ domain-containing protein 3	RNF13	JUN kinase binding	positive regulation of stress-activated protein kinase signaling cascade	lysosomal membrane
Hsym|HyS0001.532	XP_012559202.1 PREDICTED: myosin-VIIa-like [Hydra vulgaris]	0	Unconventional myosin-VIIa	MYO7A	actin filament binding	inner ear receptor cell stereocilium organization	myosin complex
Hsym|HyS0001.533	XP_012559632.1 PREDICTED: E3 ubiquitin-protein ligase CBL-like [Hydra vulgaris]	5.4e-204	Cbl proto-oncogene B	CBLB	phosphotyrosine residue binding	protein ubiquitination	membrane raft
Hsym|HyS0001.534	XP_002155924.3 PREDICTED: long-chain fatty acid transport protein 1-like [Hydra vulgaris]	2.1e-279	Long-chain fatty acid transport protein 4	SLC27A4	very long-chain fatty acid-CoA ligase activity	fatty acid transport	integral component of membrane
Hsym|HyS0001.535	XP_012563701.1 PREDICTED: somatostatin receptor type 5-like [Hydra vulgaris]	6.5e-72	NA	NA	NA	NA	NA
Hsym|HyS0001.536	XP_012562486.1 PREDICTED: retinoblastoma-binding protein 5 homolog [Hydra vulgaris]	1.3e-218	RB binding protein 5, histone lysine methyltransferase complex subunit	RBBP5	NA	NA	Set1C/COMPASS complex
Hsym|HyS0001.537	XP_020903763.1 ankyrin repeat domain-containing protein 42-like [Exaiptasia pallida]	1e-71	Ankyrin repeat domain-containing	ANKRD42	NF-kappaB binding	positive regulation of cytokine production involved in inflammatory response	nucleus
Hsym|HyS0001.538	XP_027673563.1 NACHT, LRR and PYD domains-containing protein 12, partial [Chelonia mydas]	6.7e-15	NA	NA	NA	NA	NA
Hsym|HyS0001.540	XP_012555514.1 PREDICTED: box C/D snoRNA protein 1-like [Hydra vulgaris]	1e-73	HIT-type domain-containing protein	NA	metal ion binding	NA	NA
Hsym|HyS0001.541	XP_012553589.1 PREDICTED: uncharacterized protein LOC101237947 [Hydra vulgaris]	2.3e-18	Myb transcription factor	NA	NA	NA	NA
Hsym|HyS0001.542	XP_012553589.1 PREDICTED: uncharacterized protein LOC101237947 [Hydra vulgaris]	6.6e-49	Myb transcription factor	NA	NA	NA	NA
Hsym|HyS0001.543	XP_002159342.1 PREDICTED: RNA exonuclease 4-like [Hydra vulgaris]	1.2e-67	Flavin-containing monooxygenase	REXO4	3'-5' exonuclease activity	rRNA processing	nuclear speck
Hsym|HyS0001.544	XP_020906971.1 uncharacterized protein LOC110245053 [Exaiptasia pallida]	7e-85	Homocysteine S-methyltransferase YbgG	NA	betaine-homocysteine S-methyltransferase activity	methionine biosynthetic process	NA
Hsym|HyS0001.545	XP_012553770.1 PREDICTED: FUN14 domain-containing protein 1-like [Hydra vulgaris]	1.4e-42	FUN14 domain-containing protein 1	NA	NA	NA	integral component of membrane
Hsym|HyS0001.546	XP_012559732.1 PREDICTED: arginine and glutamate-rich protein 1-like [Hydra vulgaris]	1.3e-25	Arginine and glutamate-rich protein 1-A	NA	ubiquitin-protein transferase activity	histone monoubiquitination	nucleus
Hsym|HyS0001.547	XP_002170266.2 PREDICTED: guanine nucleotide exchange factor DBS-like isoform X1 [Hydra vulgaris]	2.4e-308	Guanine nucleotide exchange factor DBS	NA	Rho guanyl-nucleotide exchange factor activity	regulation of Rho protein signal transduction	integral component of membrane
Hsym|HyS0001.548	XP_012558366.1 PREDICTED: protein asteroid-like, partial [Hydra vulgaris]	2e-40	NA	NA	NA	NA	NA
Hsym|HyS0001.549	XP_012558445.1 PREDICTED: SPRY domain-containing protein 7-like [Hydra vulgaris]	5.9e-72	SPRY domain-containing protein 7	SPRYD7	protein binding	NA	NA
Hsym|HyS0001.550	XP_002168338.2 PREDICTED: UPF0676 protein C1494.01-like [Hydra vulgaris]	2.1e-84	Oxidoreductase	NA	oxidoreductase activity	oxidation-reduction process	NA
Hsym|HyS0001.551	XP_002168338.2 PREDICTED: UPF0676 protein C1494.01-like [Hydra vulgaris]	3e-83	Thymine dioxygenase	NA	oxidoreductase activity	oxidation-reduction process	NA
Hsym|HyS0001.552	XP_002168338.2 PREDICTED: UPF0676 protein C1494.01-like [Hydra vulgaris]	1.9e-32	ABC transporter G family member 2	NA	oxidoreductase activity	oxidation-reduction process	integral component of membrane
Hsym|HyS0001.553	XP_002168338.2 PREDICTED: UPF0676 protein C1494.01-like [Hydra vulgaris]	3.2e-85	Thymine dioxygenase	NA	oxidoreductase activity	oxidation-reduction process	integral component of membrane
Hsym|HyS0001.554	XP_002168338.2 PREDICTED: UPF0676 protein C1494.01-like [Hydra vulgaris]	4.4e-80	Thymine dioxygenase	NA	oxidoreductase activity	oxidation-reduction process	integral component of membrane
Hsym|HyS0001.555	RMX43494.1 hypothetical protein pdam_00001987 [Pocillopora damicornis]	7.5e-86	Thymine dioxygenase	NA	oxidoreductase activity	oxidation-reduction process	integral component of membrane
Hsym|HyS0001.556	XP_002168338.2 PREDICTED: UPF0676 protein C1494.01-like [Hydra vulgaris]	5.3e-80	Oxoglutarate/iron-dependent oxygenase	NA	oxidoreductase activity	oxidation-reduction process	integral component of membrane
Hsym|HyS0001.557	ALJ33567.1 USF [Clytia hemisphaerica]	1.1e-62	Upstream stimulatory factor	NA	protein dimerization activity	oxidation-reduction process	integral component of membrane
Hsym|HyS0001.558	XP_020913499.1 F-box only protein 36-like [Exaiptasia pallida]	9.3e-50	Rho GTPase-activating protein 25	FBXO36	GTPase activator activity	SCF-dependent proteasomal ubiquitin-dependent protein catabolic process	NA
Hsym|HyS0001.559	XP_028403358.1 beta-1,3-galactosyltransferase 6-like [Dendronephthya gigantea]	8.1e-76	Hexosyltransferase	B3GALT6	galactosyltransferase activity	protein glycosylation	Golgi membrane
Hsym|HyS0001.560	XP_002168338.2 PREDICTED: UPF0676 protein C1494.01-like [Hydra vulgaris]	6.5e-81	Thymine dioxygenase	NA	oxidoreductase activity	oxidation-reduction process	integral component of membrane
Hsym|HyS0001.561	XP_002168338.2 PREDICTED: UPF0676 protein C1494.01-like [Hydra vulgaris]	6.2e-67	2OG-Fe(II) oxygenase family oxidoreductase	NA	oxidoreductase activity	oxidation-reduction process	NA
Hsym|HyS0001.562	XP_002159614.2 PREDICTED: histone deacetylase complex subunit SAP130-A-like [Hydra vulgaris]	9.9e-142	Histone deacetylase complex subunit SAP130	NA	NA	regulation of transcription, DNA-templated	NA
Hsym|HyS0001.563	XP_002163329.1 PREDICTED: uncharacterized protein LOC100199826 [Hydra vulgaris]	2.8e-44	Ankyrin repeat domain-containing protein 16	ANKRD16	sodium channel activity	tRNA modification	nucleus
Hsym|HyS0001.564	ELU15715.1 hypothetical protein CAPTEDRAFT_201133 [Capitella teleta]	1.4e-24	NA	NA	NA	NA	NA
Hsym|HyS0001.566	XP_012553525.1 PREDICTED: creatine kinase B-type-like [Hydra vulgaris]	9.2e-83	Mitochondrial creatine kinase	NA	creatine kinase activity	phosphagen biosynthetic process	extracellular space
Hsym|HyS0001.567	XP_002163162.2 PREDICTED: long-chain-fatty-acid--CoA ligase 4-like isoform X1 [Hydra vulgaris]	7.8e-278	Long-chain-fatty-acid--CoA ligase 4	ACSL4	arachidonate-CoA ligase activity	embryonic process involved in female pregnancy	mitochondria-associated endoplasmic reticulum membrane
Hsym|HyS0001.569	XP_001635547.1 predicted protein [Nematostella vectensis]	1e-126	Transmembrane and tetratricopeptide repeat containing 4	TMTC4	mannosyltransferase activity	protein O-linked mannosylation	integral component of membrane
Hsym|HyS0001.570	XP_002166395.1 PREDICTED: V-type proton ATPase catalytic subunit A isoform 2-like isoform X1 [Hydra vulgaris]	0	Vacuolar ATP synthase catalytic subunit A	NA	proton-transporting ATPase activity, rotational mechanism	proton transmembrane transport	proton-transporting V-type ATPase, V1 domain
Hsym|HyS0001.571	XP_027038086.1 TM2 domain-containing protein 3-like [Pocillopora damicornis]	2.8e-45	TM2 domaincontaining protein almondexlike [Nasonia vitripennis]	NA	chitin binding	ectodermal cell fate determination	integral component of membrane
Hsym|HyS0001.572	XP_012562775.1 PREDICTED: uncharacterized protein LOC105847626 [Hydra vulgaris]	1.8e-60	NA	NA	NA	NA	NA
Hsym|HyS0001.573	XP_002165955.1 PREDICTED: serum paraoxonase/arylesterase 1-like [Hydra vulgaris]	1.5e-70	GA binding protein transcription factor subunit alpha	NA	sequence-specific DNA binding	regulation of transcription, DNA-templated	nucleus
Hsym|HyS0001.574	XP_020603257.1 uncharacterized protein C17orf105 homolog [Orbicella faveolata]	5.9e-75	Cell division cycle protein 16 like protein	NA	calcium ion binding	regulation of histone H2A K63-linked ubiquitination	nuclear speck
Hsym|HyS0001.575	XP_002160265.3 PREDICTED: GRAM domain-containing protein 1B-like [Hydra vulgaris]	6.2e-120	GRAM domain-containing protein 1B	NA	NA	NA	integral component of membrane
Hsym|HyS0001.576	XP_012555355.1 PREDICTED: E3 ubiquitin-protein ligase RNF168-like [Hydra vulgaris]	1.2e-64	RING-type domain-containing protein	NA	metal ion binding	NA	NA
Hsym|HyS0001.577	XP_002169791.2 PREDICTED: putative pre-mRNA-splicing factor ATP-dependent RNA helicase DHX16 [Hydra vulgaris]	0	Calmodulin-regulated spectrin-associated protein 1	DHX16	helicase activity	endodermal cell differentiation	spliceosomal complex
Hsym|HyS0001.578	XP_002166439.1 PREDICTED: protoporphyrinogen oxidase-like isoform X1 [Hydra vulgaris]	5.9e-160	Protoporphyrinogen oxidase	PPOX	oxygen-dependent protoporphyrinogen oxidase activity	protoporphyrinogen IX biosynthetic process	mitochondrial inner membrane
Hsym|HyS0001.580	OWK61791.1 Plasminogen [Lonchura striata domestica]	6.9e-28	Hepatocyte growth factor	NA	serine-type endopeptidase activity	fibrinolysis	extracellular region
Hsym|HyS0001.582	RMX60694.1 hypothetical protein pdam_00014524 [Pocillopora damicornis]	4.3e-25	NA	NA	NA	NA	NA
Hsym|HyS0001.585	OLP76716.1 putative E3 ubiquitin-protein ligase HERC4 [Symbiodinium microadriaticum]	1.6e-07	Microneme protein 4	NA	calcium ion binding	cell adhesion	extracellular region
Hsym|HyS0001.586	XP_027042190.1 ectin-like isoform X2 [Pocillopora damicornis]	4.5e-25	A disintegrin and metalloproteinase with thrombospondin motifs 12	NA	sterol binding	sterol transport	extracellular region
Hsym|HyS0001.587	XP_002167519.2 PREDICTED: radial spoke head 1 homolog [Hydra vulgaris]	4.6e-27	Radial spoke head component 1	RSPH1	NA	spermatogenesis	motile cilium
Hsym|HyS0001.588	XP_004208387.1 PREDICTED: LOW QUALITY PROTEIN: ubiquitin-fold modifier-conjugating enzyme 1-like [Hydra vulgaris]	1.4e-76	Ubiquitin-fold modifier-conjugating enzyme 1	NA	UFM1 transferase activity	protein polyufmylation	integral component of membrane
Hsym|HyS0001.589	XP_012561242.1 PREDICTED: uncharacterized protein LOC101238333 [Hydra vulgaris]	5.8e-34	NA	NA	NA	NA	NA
Hsym|HyS0001.590	XP_028403523.1 uncharacterized protein LOC114526207 [Dendronephthya gigantea]	3.7e-104	NA	NA	NA	NA	NA
Hsym|HyS0001.591	XP_022787345.1 dihydroxyacetone kinase 1-like isoform X2 [Stylophora pistillata]	4.1e-05	NA	NA	NA	NA	NA
Hsym|HyS0001.592	XP_002168338.2 PREDICTED: UPF0676 protein C1494.01-like [Hydra vulgaris]	6.5e-86	Thymine dioxygenase	NA	oxidoreductase activity	oxidation-reduction process	integral component of membrane
Hsym|HyS0001.593	XP_012558366.1 PREDICTED: protein asteroid-like, partial [Hydra vulgaris]	1.4e-33	NA	NA	NA	NA	NA
Hsym|HyS0001.598	XP_020895260.1 uncharacterized protein LOC110234234 [Exaiptasia pallida]	5.3e-20	NA	NA	NA	NA	NA
Hsym|HyS0001.601	XP_012554387.1 PREDICTED: uncharacterized protein LOC100213835 [Hydra vulgaris]	4.1e-50	Branched-chain-amino-acid aminotransferase-like protein 2-like	NA	transaminase activity	NA	cytosol
Hsym|HyS0001.602	XP_012554387.1 PREDICTED: uncharacterized protein LOC100213835 [Hydra vulgaris]	6.2e-71	Branched-chain-amino-acid aminotransferase 2	NA	transaminase activity	NA	cytosol
Hsym|HyS0001.603	ADL39779.1 allorecognition 1 [Hydractinia symbiolongicarpus]	5.5e-32	Allorecognition 1	NA	NA	NA	integral component of membrane
Hsym|HyS0001.604	XP_012555558.1 PREDICTED: uncharacterized protein LOC105844012 [Hydra vulgaris]	1.3e-33	NA	NA	NA	NA	NA
Hsym|HyS0001.605	ADL39772.1 allorecognition 1 [Hydractinia symbiolongicarpus]	1.1e-10	NA	NA	NA	NA	NA
Hsym|HyS0001.607	XP_012565710.1 PREDICTED: uncharacterized protein LOC101238714 [Hydra vulgaris]	1.4e-32	Stress response protein NhaX	NA	NA	NA	cytoplasm
Hsym|HyS0001.608	XP_012556540.1 PREDICTED: signal-induced proliferation-associated 1-like protein 1 [Hydra vulgaris]	9.3e-212	Rap-GAP domain-containing protein (Fragment)	NA	GTPase activator activity	regulation of small GTPase mediated signal transduction	neuronal cell body
Hsym|HyS0001.609	XP_012556026.1 PREDICTED: D(1A) dopamine receptor-like [Hydra vulgaris]	1.1e-64	NA	NA	NA	NA	NA
Hsym|HyS0001.610	XP_012556026.1 PREDICTED: D(1A) dopamine receptor-like [Hydra vulgaris]	3.6e-66	NA	NA	NA	NA	NA
Hsym|HyS0001.611	XP_020912778.1 probable CTD kinase subunit alpha homolog [Exaiptasia pallida]	2.4e-17	NA	NA	NA	NA	NA
Hsym|HyS0001.614	OGT06286.1 hypothetical protein A2X78_01415 [Gammaproteobacteria bacterium GWE2_37_16]	8.8e-08	NA	NA	NA	NA	NA
Hsym|HyS0001.615	RMX38061.1 hypothetical protein pdam_00003092 [Pocillopora damicornis]	4.9e-21	Apple domain-containing protein (Fragment)	NA	NA	NA	NA
Hsym|HyS0001.619	OYX86009.1 hypothetical protein B7Y83_02950 [Flavobacteriales bacterium 32-34-25]	3e-14	F5/8 type C domain-containing protein	NA	NA	NA	NA
Hsym|HyS0001.621	XP_001638206.1 predicted protein [Nematostella vectensis]	0.00018	NA	NA	NA	NA	NA
Hsym|HyS0001.623	ADL39783.1 allorecognition 1 [Hydractinia symbiolongicarpus]	3.3e-11	NA	NA	NA	NA	NA
Hsym|HyS0001.624	ADL39770.1 allorecognition 1 [Hydractinia symbiolongicarpus]	1.5e-15	NA	NA	NA	NA	NA
Hsym|HyS0001.625	XP_012559213.1 PREDICTED: dymeclin-like [Hydra vulgaris]	2.2e-162	Reprolysin	NA	NA	Golgi organization	Golgi apparatus
Hsym|HyS0001.626	XP_020913526.1 putative uncharacterized protein CXorf58 isoform X1 [Exaiptasia pallida]	8.7e-75	Mastermind-like protein 1	NA	NA	NA	NA
Hsym|HyS0001.627	XP_002154669.1 PREDICTED: 40S ribosomal protein S19-like [Hydra vulgaris]	2.3e-59	Small subunit ribosomal protein S19e	NA	structural constituent of ribosome	translation	ribosome
Hsym|HyS0001.628	XP_012556106.1 PREDICTED: etoposide-induced protein 2.4 homolog [Hydra vulgaris]	1.5e-111	Epithelial splicing regulatory protein 1	EI24	oligosaccharyl transferase activity	macroautophagy	integral component of membrane
Hsym|HyS0001.629	KXJ17752.1 Polypeptide N-acetylgalactosaminyltransferase 2 [Exaiptasia pallida]	2.5e-46	NA	NA	NA	NA	NA
Hsym|HyS0001.630	XP_002166403.1 PREDICTED: high choriolytic enzyme 1-like [Hydra vulgaris]	1.3e-40	Low choriolytic enzyme	NA	metalloendopeptidase activity	proteolysis	integral component of membrane
Hsym|HyS0001.631	XP_002155331.1 PREDICTED: zinc metalloproteinase nas-15-like [Hydra vulgaris]	1.2e-38	Low choriolytic enzyme	NA	metalloendopeptidase activity	proteolysis	cortical granule
Hsym|HyS0001.632	BAU68225.1 hatching enzyme [Polypterus senegalus]	3e-37	Metalloendopeptidase	NA	metalloendopeptidase activity	proteolysis	integral component of membrane
Hsym|HyS0001.633	XP_022795804.1 thioredoxin, mitochondrial-like [Stylophora pistillata]	2e-31	Co-chaperone YbbN	NA	protein disulfide oxidoreductase activity	glycerol ether metabolic process	cell
Hsym|HyS0001.635	XP_012565747.1 PREDICTED: probable phospholipid-transporting ATPase IF isoform X1 [Hydra vulgaris]	0	Phospholipid-transporting ATPase	NA	ATPase-coupled intramembrane lipid transporter activity	phospholipid transport	integral component of membrane
Hsym|HyS0001.636	XP_002170609.3 PREDICTED: follistatin-related protein 1-like [Hydra vulgaris]	1.5e-58	Follistatin-related protein 1	FSTL1	calcium ion binding	regulation of BMP signaling pathway	extracellular region
Hsym|HyS0001.637	XP_002163391.2 PREDICTED: cystathionine beta-synthase [Hydra vulgaris]	2.3e-242	Cystathionine beta-synthase	CBS	cystathionine beta-synthase activity	cysteine biosynthetic process via cystathionine	cytoplasm
Hsym|HyS0001.638	XP_012566011.1 PREDICTED: 72 kDa type IV collagenase-like [Hydra vulgaris]	3.5e-57	interstitial collagenase	MMP2	metalloendopeptidase activity	collagen catabolic process	extracellular matrix
Hsym|HyS0001.641	XP_022085468.1 endothelin-converting enzyme homolog isoform X5 [Acanthaster planci]	2e-115	Neutral endopeptidase	ECE1	metalloendopeptidase activity	proteolysis	integral component of membrane
Hsym|HyS0001.642	OGT06286.1 hypothetical protein A2X78_01415 [Gammaproteobacteria bacterium GWE2_37_16]	1.1e-09	NA	NA	NA	NA	NA
Hsym|HyS0001.644	PFX13106.1 TNF receptor-associated factor 4, partial [Stylophora pistillata]	4.8e-29	RING-type domain-containing protein (Fragment)	NA	zinc ion binding	regulation of apoptotic process	NA
Hsym|HyS0001.646	XP_020601107.1 endothelin-converting enzyme homolog [Orbicella faveolata]	2e-112	Neutral endopeptidase	NA	metalloendopeptidase activity	proteolysis	integral component of membrane
Hsym|HyS0001.647	XP_012557929.1 PREDICTED: uncharacterized protein LOC101235187 isoform X1 [Hydra vulgaris]	2.6e-21	NA	NA	NA	NA	NA
Hsym|HyS0001.648	XP_002168510.2 PREDICTED: prenylated Rab acceptor protein 1-like [Hydra vulgaris]	1.2e-50	NA	NA	NA	NA	NA
Hsym|HyS0001.649	XP_002158626.2 PREDICTED: transmembrane and coiled-coil domain-containing protein 3-like [Hydra vulgaris]	1.5e-185	Transmembrane and coiled-coil domain-containing protein 3	TMCO3	solute:proton antiporter activity	proton transmembrane transport	integral component of membrane
Hsym|HyS0001.650	XP_004206684.2 PREDICTED: uncharacterized protein LOC100198634 [Hydra vulgaris]	0	DyP-type heme peroxidase B	NA	peroxidase activity	cellular oxidant detoxification	cytosol
Hsym|HyS0001.651	XP_002160921.3 PREDICTED: G2/mitotic-specific cyclin-B3-like [Hydra vulgaris]	2.8e-127	Cyclin N-terminal domain-containing protein (Fragment)	NA	protein kinase binding	regulation of G2/M transition of mitotic cell cycle	nucleus
Hsym|HyS0001.652	XP_027059735.1 kidney mitochondrial carrier protein 1-like isoform X1 [Pocillopora damicornis]	3.4e-100	Kidney mitochondrial carrier protein 1	SLC25A30	transmembrane transporter activity	mitochondrial transport	mitochondrial membrane
Hsym|HyS0001.654	XP_012564221.1 PREDICTED: mannose-6-phosphate isomerase-like [Hydra vulgaris]	1.5e-130	Mannose phosphate isomerase	MPI	mannose-6-phosphate isomerase activity	GDP-mannose biosynthetic process	cytosol
Hsym|HyS0001.655	XP_012561664.1 PREDICTED: early endosome antigen 1-like, partial [Hydra vulgaris]	2.1e-07	NA	NA	NA	NA	NA
Hsym|HyS0001.656	XP_020619520.1 uncharacterized protein LOC110057270 [Orbicella faveolata]	3.4e-61	NA	NA	NA	NA	NA
Hsym|HyS0001.658	XP_012556682.1 PREDICTED: uncharacterized protein LOC100200567 [Hydra vulgaris]	4.9e-36	NA	NA	NA	NA	NA
Hsym|HyS0001.661	XP_028399758.1 methylthioribose-1-phosphate isomerase-like isoform X2 [Dendronephthya gigantea]	1.5e-120	Methylthioribose-1-phosphate isomerase	NA	S-methyl-5-thioribose-1-phosphate isomerase activity	L-methionine salvage from S-adenosylmethionine	nucleus
Hsym|HyS0001.662	XP_002171218.2 PREDICTED: RNA 3'-terminal phosphate cyclase-like protein [Hydra vulgaris]	2.4e-161	RNA terminal phosphate cyclase like 1	RCL1	endoribonuclease activity	ribosome biogenesis	nucleolus
Hsym|HyS0001.663	AGN03868.1 Wnt1, partial [Aurelia aurita]	3.4e-35	NA	NA	NA	NA	NA
Hsym|HyS0001.664	BAB13306.1 PL10-related protein CnPL10 [Hydra vulgaris]	1.6e-248	DEAD-box helicase 3 X-linked b	NA	helicase activity	gamete generation	P granule
Hsym|HyS0001.665	RMX42067.1 hypothetical protein pdam_00001258 [Pocillopora damicornis]	3.5e-05	NA	NA	NA	NA	NA
Hsym|HyS0001.666	XP_022791958.1 uncharacterized protein LOC111331165 isoform X1 [Stylophora pistillata]	1.1e-20	NA	NA	NA	NA	NA
Hsym|HyS0001.667	XP_028398538.1 serine/threonine-protein kinase Nek7-like [Dendronephthya gigantea]	2.4e-43	NA	NA	NA	NA	NA
Hsym|HyS0001.668	XP_002165288.2 PREDICTED: THO complex subunit 6 homolog [Hydra vulgaris]	2e-119	THO complex 6	THOC6	NA	NA	NA
Hsym|HyS0001.669	XP_015771760.1 PREDICTED: AP-5 complex subunit zeta-1-like [Acropora digitifera]	5.9e-70	NA	NA	NA	NA	NA
Hsym|HyS0001.670	XP_004206448.1 PREDICTED: dipeptidyl peptidase 2-like [Hydra vulgaris]	5.5e-214	Dipeptidyl peptidase 2	DPP7	serine-type peptidase activity	proteolysis	vesicle
Hsym|HyS0001.671	XP_002161594.3 PREDICTED: calsequestrin-2-like [Hydra vulgaris]	4.6e-121	Calsequestrin	NA	calcium ion binding	NA	NA
Hsym|HyS0001.672	XP_012556019.1 PREDICTED: hemicentin-1-like [Hydra vulgaris]	3e-46	NA	NA	NA	NA	NA
Hsym|HyS0001.673	PFX24543.1 ATP-dependent DNA helicase PIF1 [Stylophora pistillata]	2.1e-43	ATP-dependent DNA helicase	NA	DNA helicase activity	telomere maintenance	NA
Hsym|HyS0001.674	XP_012556436.1 PREDICTED: beta-galactosidase-1-like protein 2 isoform X1 [Hydra vulgaris]	1.6e-216	Beta-galactosidase	GLB1L2	beta-galactosidase activity	carbohydrate metabolic process	vacuole
Hsym|HyS0001.675	ACB15467.1 glycogen synthase kinase 3 beta [Clytia hemisphaerica]	1.2e-196	Glycogen synthase kinase 3 beta	GSK3B	protein serine/threonine kinase activity	protein phosphorylation	axon
Hsym|HyS0001.676	XP_002171252.3 PREDICTED: 26S protease regulatory subunit 10B [Hydra vulgaris]	5.6e-209	Epididymis secretory protein Li 73	PSMC6	ATPase activity	ubiquitin-dependent ERAD pathway	proteasome regulatory particle, base subcomplex
Hsym|HyS0001.677	XP_019641862.1 PREDICTED: N-acetyltransferase 9-like protein [Branchiostoma belcheri]	1.2e-37	Acyl-CoA N-acyltransferase	NA	N-acetyltransferase activity	protein acetylation	NA
Hsym|HyS0001.678	XP_013070032.1 PREDICTED: caltractin-like [Biomphalaria glabrata]	3.6e-22	NA	NA	NA	NA	NA
Hsym|HyS0001.679	XP_012674947.1 PREDICTED: DNA polymerase delta subunit 3 isoform X1 [Clupea harengus]	1.1e-24	Polymerase (DNA-directed), delta 3, accessory subunit	NA	DNA-directed DNA polymerase activity	DNA synthesis involved in UV-damage excision repair	delta DNA polymerase complex
Hsym|HyS0001.680	XP_012556760.1 PREDICTED: tachykinin-like peptides receptor 86C [Hydra vulgaris]	2.1e-46	NA	NA	NA	NA	NA
Hsym|HyS0001.681	XP_002158859.1 PREDICTED: BPTI/Kunitz domain-containing protein 4-like [Hydra vulgaris]	3.3e-06	NA	NA	NA	NA	NA
Hsym|HyS0001.682	XP_020913815.1 endothelin-converting enzyme homolog [Exaiptasia pallida]	2.1e-132	Membrane metalloendopeptidase	NA	metalloendopeptidase activity	proteolysis	nucleolus
Hsym|HyS0001.683	ADL39779.1 allorecognition 1 [Hydractinia symbiolongicarpus]	2.3e-09	NA	NA	NA	NA	NA
Hsym|HyS0001.684	XP_012560575.1 PREDICTED: major facilitator superfamily domain-containing protein 1-like [Hydra vulgaris]	1.9e-183	Major facilitator superfamily domain-containing protein 1	MFSD1	NA	transmembrane transport	integral component of plasma membrane
Hsym|HyS0001.685	XP_020388889.1 cx9C motif-containing protein 4 [Rhincodon typus]	2.5e-06	NA	NA	NA	NA	NA
Hsym|HyS0001.687	XP_002167147.2 PREDICTED: sodium/potassium-transporting ATPase subunit beta-1-like [Hydra vulgaris]	2.1e-53	Sodium/potassium-transporting ATPase subunit beta-1	NA	sodium:potassium-exchanging ATPase activity	sodium ion transport	sodium:potassium-exchanging ATPase complex
Hsym|HyS0001.688	XP_004206716.2 PREDICTED: activating signal cointegrator 1 complex subunit 1-like [Hydra vulgaris]	6.6e-84	Activating signal cointegrator 1 complex subunit	NA	RNA binding	myotome development	neuromuscular junction
Hsym|HyS0001.689	XP_002157333.3 PREDICTED: GATA zinc finger domain-containing protein 14-like [Hydra vulgaris]	2.8e-17	Zf-H2C2 2 domain containing protein (Fragment)	NA	nucleic acid binding	NA	NA
Hsym|HyS0001.690	XP_012556020.1 PREDICTED: uncharacterized protein LOC105844209 [Hydra vulgaris]	4.7e-82	NA	NA	NA	NA	NA
Hsym|HyS0001.691	XP_012556020.1 PREDICTED: uncharacterized protein LOC105844209 [Hydra vulgaris]	4e-79	NA	NA	NA	NA	NA
Hsym|HyS0001.693	XP_016896479.1 low density lipoprotein receptor adapter protein 1-like isoform X3 [Cynoglossus semilaevis]	4.2e-12	NA	NA	NA	NA	NA
Hsym|HyS0001.694	XP_022087096.1 multiple epidermal growth factor-like domains protein 6 [Acanthaster planci]	9.5e-12	NA	NA	NA	NA	NA
Hsym|HyS0001.699	XP_028416007.1 alpha-protein kinase 2-like [Dendronephthya gigantea]	4.9e-19	Alpha-type protein kinase domain-containing protein	NA	protein serine/threonine kinase activity	protein phosphorylation	NA
Hsym|HyS0001.701	XP_002162866.1 PREDICTED: uncharacterized protein LOC100206984 [Hydra vulgaris]	1.4e-110	NA	NA	NA	NA	NA
Hsym|HyS0001.702	ABY62785.1 unknown protein [Hydractinia symbiolongicarpus]	5.4e-35	NA	NA	NA	NA	NA
Hsym|HyS0001.703	ABY62785.1 unknown protein [Hydractinia symbiolongicarpus]	2.5e-256	NA	NA	NA	NA	NA
Hsym|HyS0001.704	ADR32105.1 fucosyl_transferase [Hydractinia symbiolongicarpus]	4.9e-298	NA	NA	NA	NA	NA
Hsym|HyS0001.706	ADK97778.1 allorecognition 2 [Hydractinia symbiolongicarpus]	0	Allorecognition 2	ALR2	NA	NA	integral component of membrane
Hsym|HyS0001.707	ADK97778.1 allorecognition 2 [Hydractinia symbiolongicarpus]	2.5e-120	Allorecognition 2	ALR2	NA	NA	integral component of membrane
Hsym|HyS0001.708	ADK97797.1 allorecognition 2 [Hydractinia symbiolongicarpus]	2.2e-184	Allorecognition 2	ALR2	NA	NA	integral component of membrane
Hsym|HyS0001.710	XP_014834493.1 PREDICTED: uncharacterized protein LOC106912169 isoform X1 [Poecilia mexicana]	3e-53	NA	NA	NA	NA	NA
Hsym|HyS0001.711	XP_022294944.1 uncharacterized protein LOC111105063 [Crassostrea virginica]	0.0002	NA	NA	NA	NA	NA
Hsym|HyS0001.712	ADR32100.1 ATP synthase [Hydractinia symbiolongicarpus]	4.8e-147	ATP synthase mitochondrial F1 complex assembly factor 2	NA	transferase activity, transferring glycosyl groups	proton-transporting ATP synthase complex assembly	integral component of membrane
Hsym|HyS0001.713	ACN62928.1 hypothetical protein [Hydractinia symbiolongicarpus]	0	Double zinc ribbon and ankyrin repeat-containing protein 1	NA	calcium-dependent phospholipid binding	NA	NA
Hsym|HyS0001.714	XP_015778480.1 PREDICTED: ribonuclease P protein subunit p25-like protein isoform X1 [Acropora digitifera]	1.4e-06	NA	NA	NA	NA	NA
Hsym|HyS0001.715	ABY62781.1 actin related protein 8-like protein [Hydractinia symbiolongicarpus]	0	Actin-related protein 8	ACTR8	ATP binding	chromatin remodeling	Ino80 complex
Hsym|HyS0001.716	XP_012553462.1 PREDICTED: uncharacterized protein LOC105843105 [Hydra vulgaris]	3e-37	NA	NA	NA	NA	NA
Hsym|HyS0001.717	ABY62780.1 ankyrin repeat protein 17-like protein [Hydractinia symbiolongicarpus]	0	Ankyrin repeat and KH domain-containing protein 1	NA	RNA binding	NA	NA
Hsym|HyS0001.718	ABY62779.1 malate dehydrogenase 1B NAD-like protein [Hydractinia symbiolongicarpus]	5.4e-264	Malate dehydrogenase 1B	MDH1B	malate dehydrogenase activity	malate metabolic process	cell
Hsym|HyS0001.719	XP_012566747.1 PREDICTED: zinc finger and BTB domain-containing protein 20-like isoform X2 [Hydra vulgaris]	2e-21	NA	NA	NA	NA	NA
Hsym|HyS0001.720	XP_012566747.1 PREDICTED: zinc finger and BTB domain-containing protein 20-like isoform X2 [Hydra vulgaris]	4.4e-26	NA	NA	NA	NA	NA
Hsym|HyS0001.721	XP_012554653.1 PREDICTED: uncharacterized protein LOC101238716 [Hydra vulgaris]	4e-29	Fibril-forming collagen alpha chain-like	NA	extracellular matrix structural constituent	collagen-activated tyrosine kinase receptor signaling pathway	collagen trimer
Hsym|HyS0001.722	XP_012561925.1 PREDICTED: NHL repeat-containing protein 2-like [Hydra vulgaris]	2.8e-164	Thiol-disulfide isomerase/thioredoxin	NA	ubiquitin protein ligase activity	protein polyubiquitination	integral component of membrane
Hsym|HyS0001.724	XP_014672322.1 PREDICTED: uncharacterized protein LOC106812853 [Priapulus caudatus]	1.7e-28	NA	NA	NA	NA	NA
Hsym|HyS0001.725	XP_002164558.3 PREDICTED: E3 ubiquitin-protein ligase TM129-like [Hydra vulgaris]	4.5e-109	Transmembrane protein 129, E3 ubiquitin protein ligase	TMEM129	ubiquitin protein ligase activity	protein ubiquitination	endoplasmic reticulum
Hsym|HyS0001.726	XP_012553731.1 PREDICTED: C-X-C chemokine receptor type 2-like [Hydra vulgaris]	9.6e-24	NA	NA	NA	NA	NA
Hsym|HyS0001.729	XP_012560905.1 PREDICTED: uncharacterized protein LOC105846567 [Hydra vulgaris]	2.2e-35	BHLH domain-containing protein (Fragment)	NA	protein dimerization activity	NA	NA
Hsym|HyS0001.732	XP_012555335.1 PREDICTED: fibroblast growth factor receptor-like [Hydra vulgaris]	1.6e-147	Fibroblast growth factor receptor B	NA	fibroblast growth factor-activated receptor activity	fibroblast growth factor receptor signaling pathway	receptor complex
Hsym|HyS0001.733	XP_015752089.1 PREDICTED: 2-acylglycerol O-acyltransferase 1-like [Acropora digitifera]	6.4e-129	Fatty alcohol acetyltransferase	NA	transferase activity, transferring acyl groups other than amino-acyl groups	response to yeast	lipid droplet
Hsym|HyS0001.735	XP_002163602.2 PREDICTED: coatomer subunit delta-like [Hydra vulgaris]	3.6e-224	Coatomer subunit delta	ARCN1	NA	retrograde vesicle-mediated transport, Golgi to endoplasmic reticulum	COPI vesicle coat
Hsym|HyS0001.736	XP_012556249.1 PREDICTED: uncharacterized protein LOC100206113 [Hydra vulgaris]	1e-70	Ribosomal RNA processing protein 1 like protein B	RRP1	transcription coactivator activity	rRNA processing	preribosome, small subunit precursor
Hsym|HyS0001.737	XP_015762579.1 PREDICTED: uncharacterized protein LOC107341648 [Acropora digitifera]	3.1e-38	NA	NA	NA	NA	NA
Hsym|HyS0001.738	RMX56687.1 hypothetical protein pdam_00024554, partial [Pocillopora damicornis]	9.8e-77	Pogo transposable element with KRAB domain	NA	nucleic acid binding	NA	NA
Hsym|HyS0001.740	XP_019859447.1 PREDICTED: G2/M phase-specific E3 ubiquitin-protein ligase-like isoform X1 [Amphimedon queenslandica]	8e-10	NA	NA	NA	NA	NA
Hsym|HyS0001.742	XP_022802301.1 uncharacterized protein LOC111339839 [Stylophora pistillata]	1.1e-80	NA	NA	NA	NA	NA
Hsym|HyS0001.743	XP_008179395.1 PREDICTED: tigger transposable element-derived protein 2-like [Acyrthosiphon pisum]	8.2e-05	NA	NA	NA	NA	NA
Hsym|HyS0001.744	XP_012556135.1 PREDICTED: cyclin-dependent kinase inhibitor 1B-like [Hydra vulgaris]	2e-15	NA	NA	NA	NA	NA
Hsym|HyS0001.746	PIK43235.1 hypothetical protein BSL78_19926 [Apostichopus japonicus]	5e-15	THAP-type domain-containing protein	NA	DNA binding	NA	NA
Hsym|HyS0001.747	XP_002163374.1 PREDICTED: leucine-rich repeat-containing protein 58-like [Hydra vulgaris]	1.7e-37	Variable lymphocyte receptor B	NA	protein serine/threonine kinase activity	protein phosphorylation	membrane
Hsym|HyS0001.748	XP_012555558.1 PREDICTED: uncharacterized protein LOC105844012 [Hydra vulgaris]	4.3e-07	NA	NA	NA	NA	NA
Hsym|HyS0001.749	XP_002170406.3 PREDICTED: replication factor C subunit 4-like [Hydra vulgaris]	5.8e-131	Replication factor C subunit 4	RFC4	DNA clamp loader activity	DNA replication	DNA replication factor C complex
Hsym|HyS0001.750	PFX25244.1 SCAN domain-containing protein 3 [Stylophora pistillata]	1.1e-12	NA	NA	NA	NA	NA
Hsym|HyS0001.751	XP_012556570.1 PREDICTED: roundabout homolog 1-like [Hydra vulgaris]	2.2e-285	NA	NA	NA	NA	NA
Hsym|HyS0001.752	XP_022291319.1 uncharacterized protein LOC111102743 [Crassostrea virginica]	1.5e-07	NA	NA	NA	NA	NA
Hsym|HyS0001.756	XP_025192114.1 uncharacterized protein LOC112592310 [Melanaphis sacchari]	0.0002	Gag-pol polyprotein	NA	NA	DNA integration	NA
Hsym|HyS0001.760	XP_002162313.1 PREDICTED: propionyl-CoA carboxylase alpha chain, mitochondrial [Hydra vulgaris]	4.1e-287	Propionyl-CoA carboxylase subunit alpha	PCCA	ligase activity	fatty acid catabolic process	mitochondrial matrix
Hsym|HyS0002.1	RLJ22719.1 hypothetical protein DJ031_00325, partial [bacterium endosymbiont of Escarpia laminata]	0.00033	NA	NA	NA	NA	NA
Hsym|HyS0002.4	XP_002166712.2 PREDICTED: uncharacterized protein LOC100202097 [Hydra vulgaris]	4.3e-231	NA	NA	NA	NA	NA
Hsym|HyS0002.6	XP_004209209.1 PREDICTED: ER membrane protein complex subunit 7-like [Hydra vulgaris]	1.7e-60	ER membrane protein complex subunit 7	NA	carbohydrate binding	protein ubiquitination	integral component of membrane
Hsym|HyS0002.10	XP_012555643.1 PREDICTED: nucleoprotein TPR-like isoform X1 [Hydra vulgaris]	0	Nucleoprotein TPR (Fragment)	NA	NA	protein import into nucleus	cell
Hsym|HyS0002.11	RUA05016.1 hypothetical protein DSY43_05490, partial [Gammaproteobacteria bacterium]	2e-36	NA	NA	NA	NA	NA
Hsym|HyS0002.14	XP_027037952.1 RNA-binding protein NOB1-like [Pocillopora damicornis]	1.2e-89	PINc domain-containing protein (Fragment)	NOB1	endoribonuclease activity	cleavage involved in rRNA processing	nucleus
Hsym|HyS0002.16	XP_002154561.3 PREDICTED: nibrin-like [Hydra vulgaris]	1.1e-76	NA	NA	NA	NA	NA
Hsym|HyS0002.18	XP_012565623.1 PREDICTED: ankyrin repeat domain-containing protein SOWAHB-like isoform X1 [Hydra vulgaris]	7.7e-19	NA	NA	NA	NA	NA
Hsym|HyS0002.19	XP_004209094.1 PREDICTED: uncharacterized protein LOC101234615 [Hydra vulgaris]	6e-40	NA	NA	NA	NA	NA
Hsym|HyS0002.20	XP_004209094.1 PREDICTED: uncharacterized protein LOC101234615 [Hydra vulgaris]	8.5e-13	SGNH hydrolase-type esterase domain-containing protein	NA	lysophospholipase activity	NA	NA
Hsym|HyS0002.21	XP_002160454.3 PREDICTED: regulator of microtubule dynamics protein 1-like isoform X1 [Hydra vulgaris]	2.5e-97	Regulator of microtubule dynamics protein 1	NA	1,3-beta-D-glucan synthase activity	(1->3)-beta-D-glucan biosynthetic process	retromer, cargo-selective complex
Hsym|HyS0002.22	XP_012554948.1 PREDICTED: cleavage and polyadenylation specificity factor subunit 1-like [Hydra vulgaris]	0	Cleavage and polyadenylation specificity factor subunit	CPSF1	nucleic acid binding	mRNA polyadenylation	nucleus
Hsym|HyS0002.23	XP_012555588.1 PREDICTED: LOW QUALITY PROTEIN: fibroin heavy chain-like [Hydra vulgaris]	1.4e-57	Staphylococcal protein A	NA	translation initiation factor activity	chitin metabolic process	cell surface
Hsym|HyS0002.24	XP_012561248.1 PREDICTED: uncharacterized protein LOC105846753 [Hydra vulgaris]	8.8e-88	Glycosyl transferase	GLIPR2	protein homodimerization activity	positive regulation of epithelial to mesenchymal transition	extracellular region
Hsym|HyS0002.25	XP_002166813.3 PREDICTED: nucleoporin seh1-like [Hydra vulgaris]	2.2e-143	centrosomal protein of 192 kDa	SEH1L	structural molecule activity	positive regulation of TORC1 signaling	Seh1-associated complex
Hsym|HyS0002.26	XP_012563282.1 PREDICTED: dol-P-Man:Man(5)GlcNAc(2)-PP-Dol alpha-1,3-mannosyltransferase-like [Hydra vulgaris]	7.8e-39	Dolichyl-P-Man:Man(5)GlcNAc(2)-PP-dolichyl mannosyltransferase	ALG3	dol-P-Man:Man(5)GlcNAc(2)-PP-Dol alpha-1,3-mannosyltransferase activity	mannosylation	integral component of endoplasmic reticulum membrane
Hsym|HyS0002.29	XP_027040621.1 adenine phosphoribosyltransferase-like [Pocillopora damicornis]	9.8e-50	Adenine phosphoribosyl transferase	APRT	adenine phosphoribosyltransferase activity	adenine salvage	cytoplasm
Hsym|HyS0002.30	XP_002160414.2 PREDICTED: transmembrane prolyl 4-hydroxylase-like [Hydra vulgaris]	1.6e-183	Transmembrane prolyl 4-hydroxylase	P4HTM	L-ascorbic acid binding	peptidyl-proline hydroxylation to 4-hydroxy-L-proline	endoplasmic reticulum
Hsym|HyS0002.31	XP_012561371.1 PREDICTED: uncharacterized protein LOC100205880 [Hydra vulgaris]	8.9e-175	Tudor domain-containing protein 12 (Fragment)	NA	ATP binding	NA	NA
Hsym|HyS0002.32	XP_004206345.2 PREDICTED: integrator complex subunit 8-like [Hydra vulgaris]	0	Nematogalectin B	NA	carbohydrate binding	snRNA 3'-end processing	nematocyst
Hsym|HyS0002.33	XP_002166749.1 PREDICTED: iroquois-class homeodomain protein IRX-2-like [Hydra vulgaris]	1.2e-87	Homeobox protein caupolican	NA	sequence-specific DNA binding	regulation of transcription, DNA-templated	nucleus
Hsym|HyS0002.34	XP_002165878.2 PREDICTED: chromodomain Y-like protein 2 [Hydra vulgaris]	7.1e-131	NA	NA	NA	NA	NA
Hsym|HyS0002.35	XP_012561257.1 PREDICTED: AP-1 complex subunit gamma-1 [Hydra vulgaris]	0	AP-1 complex subunit gamma	NA	clathrin adaptor activity	vesicle-mediated transport	AP-1 adaptor complex
Hsym|HyS0002.36	XP_012560765.1 PREDICTED: glutathione synthetase-like [Hydra vulgaris]	6.6e-183	Glutathione synthetase	GSS	glutathione binding	glutathione biosynthetic process	cytosol
Hsym|HyS0002.37	XP_002162379.2 PREDICTED: proteasome subunit beta type-5-like [Hydra vulgaris]	3.5e-117	Proteasome subunit beta	PSMB5	threonine-type endopeptidase activity	proteolysis involved in cellular protein catabolic process	proteasome core complex
Hsym|HyS0002.39	XP_004211818.2 PREDICTED: probable ATP-dependent RNA helicase YTHDC2 isoform X1 [Hydra vulgaris]	0	YTH domain containing 2	YTHDC2	helicase activity	positive regulation by host of viral genome replication	ribonucleoprotein granule
Hsym|HyS0002.40	XP_012559558.1 PREDICTED: protein fantom-like [Hydra vulgaris]	0	Histone acetyltransferase KAT6A	RPGRIP1L	thromboxane A2 receptor binding	establishment of planar polarity	ciliary transition zone
Hsym|HyS0002.41	XP_028415023.1 uncharacterized protein LOC114538102 [Dendronephthya gigantea]	1e-22	NA	NA	NA	NA	NA
Hsym|HyS0002.42	XP_020602820.1 protein fantom-like isoform X1 [Orbicella faveolata]	9.7e-31	RPGR interacting protein 1	NA	thromboxane A2 receptor binding	embryonic pattern specification	ciliary transition zone
Hsym|HyS0002.43	XP_002165782.1 PREDICTED: ubiquitin-conjugating enzyme E2 W-like [Hydra vulgaris]	3.5e-66	Ubiquitin-conjugating enzyme	UBE2W	ubiquitin conjugating enzyme activity	proteasome-mediated ubiquitin-dependent protein catabolic process	nucleus
Hsym|HyS0002.44	ADD22404.1 cnidarian egg lectin isoform d [Hydractinia echinata]	1.7e-247	Thrombospondin type 1 repeat-containing protein 2	NA	carbohydrate binding	chitin metabolic process	extracellular region
Hsym|HyS0002.45	XP_002156393.1 PREDICTED: uncharacterized protein LOC100200216 [Hydra vulgaris]	5.2e-111	NA	NA	NA	NA	NA
Hsym|HyS0002.46	XP_002165800.3 PREDICTED: vacuolar protein sorting-associated protein 35-like isoform X1 [Hydra vulgaris]	0	Vacuolar protein sorting-associated protein 35	VPS35	D1 dopamine receptor binding	retrograde transport, endosome to Golgi	retromer, cargo-selective complex
Hsym|HyS0002.48	XP_028415388.1 uncharacterized protein LOC114538408 isoform X1 [Dendronephthya gigantea]	3.7e-38	NA	NA	NA	NA	NA
Hsym|HyS0002.49	XP_001637385.1 predicted protein [Nematostella vectensis]	2.6e-31	NA	NA	NA	NA	NA
Hsym|HyS0002.50	XP_001637386.1 predicted protein [Nematostella vectensis]	2.8e-45	Chromodomain protein, putative	NA	DNA-directed DNA polymerase activity	DNA biosynthetic process	NA
Hsym|HyS0002.51	XP_002158489.1 PREDICTED: uncharacterized protein LOC100213673 [Hydra vulgaris]	4.7e-66	NA	NA	NA	NA	NA
Hsym|HyS0002.52	XP_012558983.1 PREDICTED: leukocyte receptor cluster member 1 homolog [Hydra vulgaris]	8.8e-09	Leukocyte receptor cluster member 1	LENG1	transferase activity, transferring acyl groups other than amino-acyl groups	NA	integral component of membrane
Hsym|HyS0002.53	XP_015764008.1 PREDICTED: cysteine and histidine-rich protein 1-like isoform X1 [Acropora digitifera]	1e-32	Cysteine and histidine-rich protein 1	NA	metal ion binding	ubiquitin-dependent protein catabolic process	nucleus
Hsym|HyS0002.54	CRL02418.1 CLUMA_CG015397, isoform A [Clunio marinus]	4.2e-36	Cysteine and histidine-rich protein 1-B	NA	zinc ion binding	ubiquitin-dependent protein catabolic process	nucleus
Hsym|HyS0002.55	XP_002161785.2 PREDICTED: RNA polymerase II subunit A C-terminal domain phosphatase-like [Hydra vulgaris]	1.1e-232	RNA polymerase II subunit A C-terminal domain phosphatase	CTDP1	RNA polymerase II CTD heptapeptide repeat phosphatase activity	dephosphorylation of RNA polymerase II C-terminal domain	nucleus
Hsym|HyS0002.56	XP_002160984.2 PREDICTED: tetratricopeptide repeat protein 5-like isoform X1 [Hydra vulgaris]	2.2e-134	tetratricopeptide repeat protein 5	TTC5	chromatin binding	positive regulation of transcription by RNA polymerase II	nucleoplasm
Hsym|HyS0002.57	XP_012557662.1 PREDICTED: methyltransferase-like protein 9 [Hydra vulgaris]	1.3e-112	Methyltransferase like 9	METTL9	methyltransferase activity	methylation	integral component of membrane
Hsym|HyS0002.58	XP_002168529.1 PREDICTED: UPF0489 protein C5orf22 homolog [Hydra vulgaris]	1.9e-96	NA	NA	NA	NA	NA
Hsym|HyS0002.59	XP_012557659.1 PREDICTED: D(1C) dopamine receptor-like [Hydra vulgaris]	6.1e-73	NA	NA	NA	NA	NA
Hsym|HyS0002.60	XP_012558808.1 PREDICTED: aurora kinase C [Hydra vulgaris]	1.5e-130	N-acetylgalactosamine-6-sulfatase	AURKA	protein serine/threonine kinase activity	mitotic centrosome separation	spindle pole centrosome
Hsym|HyS0002.61	XP_015763345.1 PREDICTED: uncharacterized protein KIAA1958-like [Acropora digitifera]	3.7e-42	Carboxypeptidase N subunit 2	NA	carboxypeptidase activity	G protein-coupled receptor signaling pathway	integral component of membrane
Hsym|HyS0002.62	XP_002164359.1 PREDICTED: nuclear pore complex protein Nup93-like [Hydra vulgaris]	0	Nuclear pore complex protein Nup93	NUP93	structural constituent of nuclear pore	mRNA transport	nuclear pore
Hsym|HyS0002.63	XP_002165888.1 PREDICTED: protein APCDD1-like [Hydra vulgaris]	3.3e-84	NA	NA	NA	NA	NA
Hsym|HyS0002.65	XP_012555735.1 PREDICTED: protein AKTIP homolog isoform X1 [Hydra vulgaris]	9.6e-105	AKT-interacting protein isoform A	AKTIP	ubiquitin conjugating enzyme activity	early endosome to late endosome transport	FHF complex
Hsym|HyS0002.66	XP_004208678.1 PREDICTED: SNF-related serine/threonine-protein kinase-like [Hydra vulgaris]	4.8e-159	Serine/threonine protein kinase	NA	protein kinase activity	protein phosphorylation	nucleus
Hsym|HyS0002.67	XP_002162061.3 PREDICTED: E3 ubiquitin-protein ligase Itchy-like [Hydra vulgaris]	2.8e-287	WW domain containing E3 ubiquitin protein ligase 1	WWP1	ubiquitin protein ligase activity	ubiquitin-dependent protein catabolic process	cell cortex
Hsym|HyS0002.68	XP_027037394.1 spermatogenesis-associated protein 48-like [Pocillopora damicornis]	3.9e-16	NA	NA	NA	NA	NA
Hsym|HyS0002.69	XP_020894429.1 uncharacterized protein LOC110233475 [Exaiptasia pallida]	7.4e-52	NA	NA	NA	NA	NA
Hsym|HyS0002.70	XP_023233027.1 protein C19orf12 homolog [Centruroides sculpturatus]	8.7e-09	NA	NA	NA	NA	NA
Hsym|HyS0002.71	XP_022093128.1 uncharacterized protein LOC110980597 [Acanthaster planci]	1.8e-127	Polysaccharide pyruvyl transferase	NA	transferase activity	NA	integral component of membrane
Hsym|HyS0002.72	XP_012561362.1 PREDICTED: probable iron/ascorbate oxidoreductase DDB_G0283291 [Hydra vulgaris]	8.6e-109	Isopenicillin N synthase-like dioxygenase	NA	oxidoreductase activity	oxidation-reduction process	NA
Hsym|HyS0002.73	XP_028409973.1 mitochondrial ribosome-associated GTPase 2-like [Dendronephthya gigantea]	9.1e-81	GTP-binding protein Obg	OBG	GTPase activity	ribosome biogenesis	cytoplasm
Hsym|HyS0002.74	XP_020631317.1 NEDD8-activating enzyme E1 catalytic subunit-like isoform X1 [Orbicella faveolata]	2.5e-168	Ubiquitin-activating enzyme 3	UBA3	NEDD8 activating enzyme activity	protein neddylation	nucleus
Hsym|HyS0002.75	XP_027038657.1 glucose-6-phosphate isomerase-like isoform X1 [Pocillopora damicornis]	2e-228	Glucose-6-phosphate isomerase	NA	glucose-6-phosphate isomerase activity	gluconeogenesis	cytoplasm
Hsym|HyS0002.76	XP_002155788.2 PREDICTED: GTPase Era, mitochondrial-like [Hydra vulgaris]	1.1e-105	GTPase Era, mitochondrial	ERA	GTP binding	ribosomal small subunit biogenesis	mitochondrial matrix
Hsym|HyS0002.77	XP_004210449.1 PREDICTED: cytoplasmic dynein 1 light intermediate chain 1-like [Hydra vulgaris]	6.3e-135	Cytoplasmic dynein light-intermediate chain 1	NA	microtubule motor activity	microtubule-based movement	cytoplasmic dynein complex
Hsym|HyS0002.78	XP_002162957.2 PREDICTED: low choriolytic enzyme-like [Hydra vulgaris]	2.3e-90	Metalloendopeptidase	NA	metalloendopeptidase activity	proteolysis	membrane
Hsym|HyS0002.79	XP_012565132.1 PREDICTED: ectonucleotide pyrophosphatase/phosphodiesterase family member 5-like [Hydra vulgaris]	1.2e-100	Ectonucleotide pyrophosphatase/phosphodiesterase 4	ENPP4	bis(5'-adenosyl)-triphosphatase activity	positive regulation of blood coagulation	integral component of membrane
Hsym|HyS0002.80	XP_027046240.1 negative elongation factor C/D-like [Pocillopora damicornis]	4.6e-167	Negative elongation factor D	NELFCD	translation elongation factor activity	negative regulation of transcription, DNA-templated	nucleus
Hsym|HyS0002.81	XP_012562261.1 PREDICTED: T-cell immunomodulatory protein-like [Hydra vulgaris]	1.7e-148	Integrin alpha FG-GAP repeat containing 1	ITFG1	NA	NA	integral component of membrane
Hsym|HyS0002.82	XP_004211138.2 PREDICTED: carboxypeptidase D-like [Hydra vulgaris]	1.4e-120	Carboxypeptidase D	NA	metallocarboxypeptidase activity	proteolysis	extracellular space
Hsym|HyS0002.83	XP_023658943.1 uncharacterized protein LOC111839347 isoform X1 [Paramormyrops kingsleyae]	2.6e-24	NA	NA	NA	NA	NA
Hsym|HyS0002.84	XP_004206328.1 PREDICTED: dolichyl-diphosphooligosaccharide--protein glycosyltransferase subunit dad1-like [Hydra vulgaris]	8.5e-49	Dolichyl-diphosphooligosaccharide--protein glycosyltransferase subunit DAD1	NA	dolichyl-diphosphooligosaccharide-protein glycotransferase activity	protein glycosylation	oligosaccharyltransferase complex
Hsym|HyS0002.85	XP_004211138.2 PREDICTED: carboxypeptidase D-like [Hydra vulgaris]	8e-117	carboxypeptidase D	CPD	metallocarboxypeptidase activity	proteolysis	extracellular space
Hsym|HyS0002.86	XP_002170055.3 PREDICTED: kelch-like protein 12 [Hydra vulgaris]	8.2e-74	Kelch-like ECH-associated protein 1	NA	transcription factor binding	protein ubiquitination	Cul3-RING ubiquitin ligase complex
Hsym|HyS0002.87	XP_012555469.1 PREDICTED: cytochrome P450 4V2-like [Hydra vulgaris]	2.6e-116	Cytochrome P450 4V2 (inferred by orthology to a human protein)	NA	oxidoreductase activity, acting on paired donors, with incorporation or reduction of molecular oxygen	oxidation-reduction process	integral component of membrane
Hsym|HyS0002.88	XP_012555469.1 PREDICTED: cytochrome P450 4V2-like [Hydra vulgaris]	4.8e-125	p450 domain containing protein (Fragment)	NA	oxidoreductase activity, acting on paired donors, with incorporation or reduction of molecular oxygen	oxidation-reduction process	integral component of membrane
Hsym|HyS0002.89	XP_004210254.2 PREDICTED: nuclear receptor-binding protein-like [Hydra vulgaris]	4.4e-180	Nuclear receptor binding protein 1	NRBP1	protein kinase activity	protein phosphorylation	endomembrane system
Hsym|HyS0002.91	XP_012567044.1 PREDICTED: probable inactive serine/threonine-protein kinase DDB_G0274613 [Hydra vulgaris]	1.3e-06	NA	NA	NA	NA	NA
Hsym|HyS0002.93	XP_005989823.1 PREDICTED: guanosine-3',5'-bis(diphosphate) 3'-pyrophosphohydrolase MESH1 [Latimeria chalumnae]	3.8e-59	HD domain-containing protein 3	HDDC3	hydrolase activity	NA	nucleoplasm
Hsym|HyS0002.94	XP_020609558.1 metallophosphoesterase 1-like [Orbicella faveolata]	7.7e-83	Metallophosphoesterase	NA	phosphoric diester hydrolase activity	GPI anchor biosynthetic process	endoplasmic reticulum-Golgi intermediate compartment
Hsym|HyS0002.95	XP_015766921.1 PREDICTED: NADH dehydrogenase [ubiquinone] 1 beta subcomplex subunit 9-like [Acropora digitifera]	7e-36	NADH dehydrogenase ubiquinone 1 beta subcomplex subunit 9	NA	oxidoreductase activity	mitochondrial electron transport, NADH to ubiquinone	mitochondrial respiratory chain complex I
Hsym|HyS0002.96	XP_012553826.1 PREDICTED: ankyrin repeat domain-containing protein 27-like [Hydra vulgaris]	1.3e-243	Ankyrin repeat domain-containing protein 27	ANKRD27	SNARE binding	negative regulation of SNARE complex assembly	tubular endosome
Hsym|HyS0002.97	XP_027047559.1 flap endonuclease 1-like isoform X1 [Pocillopora damicornis]	1.3e-154	Flap endonuclease 1-B	FEN1	5'-flap endonuclease activity	DNA replication, removal of RNA primer	nucleoplasm
Hsym|HyS0002.98	XP_002163746.2 PREDICTED: phosphatidylinositide phosphatase SAC1-like [Hydra vulgaris]	1.8e-248	Elongation of very long chain fatty acids protein 1	SACM1L	phosphoric ester hydrolase activity	phosphatidylinositol dephosphorylation	AMPA glutamate receptor complex
Hsym|HyS0002.99	XP_012934800.1 PREDICTED: sushi, von Willebrand factor type A, EGF and pentraxin domain-containing protein 1-like [Aplysia californica]	2.5e-06	NA	NA	NA	NA	NA
Hsym|HyS0002.107	WP_053993505.1 hypothetical protein [Lysinibacillus macroides]	1.9e-09	NA	NA	NA	NA	NA
Hsym|HyS0002.108	WP_053993505.1 hypothetical protein [Lysinibacillus macroides]	1.1e-09	NA	NA	NA	NA	NA
Hsym|HyS0002.111	XP_012563661.1 PREDICTED: myophilin-like [Hydra vulgaris]	1.7e-73	Transgelin	NA	calmodulin binding	actomyosin structure organization	nucleus
Hsym|HyS0002.112	PFX21237.1 Piezo-type mechanosensitive ion channel component 2, partial [Stylophora pistillata]	3.7e-68	NA	NA	NA	NA	NA
Hsym|HyS0002.113	XP_012555035.1 PREDICTED: probable malonyl-CoA-acyl carrier protein transacylase, mitochondrial [Hydra vulgaris]	3.7e-58	NA	NA	NA	NA	NA
Hsym|HyS0002.114	XP_012553802.1 PREDICTED: phosphatidylinositol N-acetylglucosaminyltransferase subunit A-like, partial [Hydra vulgaris]	2.1e-174	Phosphatidylinositol N-acetylglucosaminyltransferase subunit A	PIGA	transferase activity, transferring glycosyl groups	GPI anchor biosynthetic process	glycosylphosphatidylinositol-N-acetylglucosaminyltransferase (GPI-GnT) complex
Hsym|HyS0002.115	XP_002109532.1 hypothetical protein TRIADDRAFT_53661 [Trichoplax adhaerens]	8.4e-56	Calcium-binding and coiled-coil domain-containing protein 1	ARMC7	NA	NA	NA
Hsym|HyS0002.116	XP_005108035.1 PREDICTED: adrenodoxin-like protein, mitochondrial [Aplysia californica]	7e-51	Adrenodoxin mitochondrial	NA	2 iron, 2 sulfur cluster binding	electron transport chain	mitochondrial matrix
Hsym|HyS0002.117	XP_002166116.1 PREDICTED: proteasome subunit alpha type-7-like [Hydra vulgaris]	1.8e-113	Proteasome subunit alpha type	PSMA7	threonine-type endopeptidase activity	ubiquitin-dependent protein catabolic process	proteasome core complex, alpha-subunit complex
Hsym|HyS0002.118	PFX19762.1 hypothetical protein AWC38_SpisGene15796 [Stylophora pistillata]	1.4e-36	NA	NA	NA	NA	NA
Hsym|HyS0002.119	XP_012557041.1 PREDICTED: gamma-glutamyl hydrolase-like [Hydra vulgaris]	1.5e-61	Folate gamma-glutamyl hydrolase (Fragment)	NA	gamma-glutamyl-peptidase activity	proteolysis	NA
Hsym|HyS0002.121	XP_013386811.1 protein sidekick-2 isoform X2 [Lingula anatina]	2.2e-17	NA	NA	NA	NA	NA
Hsym|HyS0002.122	XP_001622540.1 hypothetical protein NEMVEDRAFT_v1g248399 [Nematostella vectensis]	2e-13	NA	NA	NA	NA	NA
Hsym|HyS0002.124	XP_002162193.3 PREDICTED: uncharacterized protein LOC100212316 [Hydra vulgaris]	2.2e-173	von Willebrand factor A domain-containing protein 7	NA	G protein-coupled receptor activity	negative regulation of angiogenesis	integral component of membrane
Hsym|HyS0002.125	XP_012556961.1 PREDICTED: uncharacterized protein LOC100215572 [Hydra vulgaris]	4.8e-161	Differentially expressed in FDCP 8	DEF8	metal ion binding	intracellular signal transduction	integral component of membrane
Hsym|HyS0002.126	XP_002165656.1 PREDICTED: 2,4-dienoyl-CoA reductase, mitochondrial-like [Hydra vulgaris]	4.1e-117	#NAME?	DECR1	2,4-dienoyl-CoA reductase (NADPH) activity	positive regulation of cold-induced thermogenesis	nucleoplasm
Hsym|HyS0002.127	XP_012555778.1 PREDICTED: uncharacterized protein LOC100202453 [Hydra vulgaris]	2.4e-107	TLDc domain-containing protein	NA	NA	NA	NA
Hsym|HyS0002.128	XP_012555778.1 PREDICTED: uncharacterized protein LOC100202453 [Hydra vulgaris]	1.7e-32	NA	NA	NA	NA	NA
Hsym|HyS0002.129	XP_002159751.3 PREDICTED: CCR4-NOT transcription complex subunit 10-like [Hydra vulgaris]	6.2e-228	CCR4-NOT transcription complex subunit	CNOT10	NA	regulation of translation	CCR4-NOT complex
Hsym|HyS0002.132	XP_012563851.1 PREDICTED: acid-sensing ion channel 4-like isoform X1 [Hydra vulgaris]	4.2e-46	NA	NA	NA	NA	NA
Hsym|HyS0002.134	XP_012563107.1 PREDICTED: uncharacterized protein LOC101236621, partial [Hydra vulgaris]	1.5e-20	NA	NA	NA	NA	NA
Hsym|HyS0002.135	XP_012565103.1 PREDICTED: uncharacterized protein K02A2.6-like [Hydra vulgaris]	2.8e-30	NA	NA	NA	NA	NA
Hsym|HyS0002.136	XP_012564450.1 PREDICTED: probable thiopurine S-methyltransferase [Hydra vulgaris]	3.2e-33	NA	NA	NA	NA	NA
Hsym|HyS0002.138	XP_012564451.1 PREDICTED: probable thiopurine S-methyltransferase [Hydra vulgaris]	4.2e-11	NA	NA	NA	NA	NA
Hsym|HyS0002.141	XP_012564451.1 PREDICTED: probable thiopurine S-methyltransferase [Hydra vulgaris]	9.7e-33	NA	NA	NA	NA	NA
Hsym|HyS0002.142	XP_012564451.1 PREDICTED: probable thiopurine S-methyltransferase [Hydra vulgaris]	6.2e-38	NA	NA	NA	NA	NA
Hsym|HyS0002.143	PIK37928.1 hypothetical protein BSL78_25232 [Apostichopus japonicus]	4.4e-165	Hydrogenase maturation factor HoxX	NA	hydroxymethyl-, formyl- and related transferase activity	biosynthetic process	NA
Hsym|HyS0002.144	XP_012564855.1 PREDICTED: uncharacterized protein LOC105849096 [Hydra vulgaris]	6.8e-60	NA	NA	NA	NA	NA
Hsym|HyS0002.145	XP_012564855.1 PREDICTED: uncharacterized protein LOC105849096 [Hydra vulgaris]	2e-39	NA	NA	NA	NA	NA
Hsym|HyS0002.146	XP_012561881.1 PREDICTED: MTSS1-like protein [Hydra vulgaris]	1.1e-116	metastasis suppressor protein 1	NA	actin binding	plasma membrane organization	voltage-gated potassium channel complex
Hsym|HyS0002.147	XP_012561882.1 PREDICTED: uncharacterized protein LOC101238988 [Hydra vulgaris]	2.2e-61	RING-type domain-containing protein	NA	NA	NA	NA
Hsym|HyS0002.148	XP_002163629.1 PREDICTED: 60S ribosomal protein L14-like [Hydra vulgaris]	8.9e-42	KOW domain-containing protein	RPL14	structural constituent of ribosome	translation	ribosome
Hsym|HyS0002.149	XP_002153796.2 PREDICTED: ubiquitin-conjugating enzyme E2 variant 2-like [Hydra vulgaris]	4.6e-57	Ubiquitin-conjugating enzyme	NA	ubiquitin conjugating enzyme activity	protein K63-linked ubiquitination	UBC13-UEV1A complex
Hsym|HyS0002.150	XP_022782211.1 uncharacterized protein LOC111323175 [Stylophora pistillata]	0.00035	Putative outer membrane protein pmp6	NA	NA	NA	integral component of membrane
Hsym|HyS0002.152	XP_002156050.3 PREDICTED: INO80 complex subunit B-like [Hydra vulgaris]	5.1e-29	Zinc finger HIT domain-containing protein 4	INO80B	NA	chromatin remodeling	Ino80 complex
Hsym|HyS0002.153	XP_012558547.1 PREDICTED: ankyrin repeat domain-containing protein 49-like isoform X2 [Hydra vulgaris]	1.6e-21	Ankyrin repeat domain-containing protein 49	ANKRD49	phospholipase A2 activity (consuming 1,2-dipalmitoylphosphatidylcholine)	positive regulation of transcription, DNA-templated	integral component of membrane
Hsym|HyS0002.154	XP_013386004.1 serine/arginine repetitive matrix protein 1 [Lingula anatina]	5.5e-52	Methyl-CpG binding domain 4 DNA glycosylase	MBD4	pyrimidine-specific mismatch base pair DNA N-glycosylase activity	DNA repair	nucleus
Hsym|HyS0002.155	XP_027036131.1 KDEL motif-containing protein 1-like [Pocillopora damicornis]	3.8e-173	KDEL motif-containing protein 1	KDELC1	glucosyltransferase activity	protein O-linked glycosylation via serine	endoplasmic reticulum lumen
Hsym|HyS0002.157	XP_012558843.1 PREDICTED: uncharacterized protein LOC105845533 [Hydra vulgaris]	1.3e-38	NA	NA	NA	NA	NA
Hsym|HyS0002.159	XP_020899150.1 1-aminocyclopropane-1-carboxylate synthase-like protein 1 [Exaiptasia pallida]	1.1e-88	1-aminocyclopropane-1-carboxylate synthase-like protein 1	NA	pyridoxal phosphate binding	biosynthetic process	NA
Hsym|HyS0002.160	XP_001624752.1 predicted protein [Nematostella vectensis]	1.6e-85	1-aminocyclopropane-1-carboxylate synthase 1	NA	pyridoxal phosphate binding	biosynthetic process	NA
Hsym|HyS0002.161	XP_020619737.1 C-Maf-inducing protein-like isoform X1 [Orbicella faveolata]	4.6e-147	Putative c-Maf-inducing protein Tc-mip isoform isoform 1	NA	ubiquitin-protein transferase activity	SCF-dependent proteasomal ubiquitin-dependent protein catabolic process	SCF ubiquitin ligase complex
Hsym|HyS0002.162	XP_012563317.1 PREDICTED: uncharacterized protein LOC105847980 [Hydra vulgaris]	2.2e-25	NA	NA	NA	NA	NA
Hsym|HyS0002.163	RMX56600.1 hypothetical protein pdam_00002400 [Pocillopora damicornis]	8.6e-18	NA	NA	NA	NA	NA
Hsym|HyS0002.164	XP_012556445.1 PREDICTED: chromodomain-helicase-DNA-binding protein 8-like [Hydra vulgaris]	0	Chromodomain-helicase-DNA-binding protein 7	NA	helicase activity	cell surface receptor signaling pathway	nucleus
Hsym|HyS0002.171	XP_012564604.1 PREDICTED: uncharacterized protein LOC101238600 [Hydra vulgaris]	1.8e-73	Tyrosinase	MELC2	oxidoreductase activity	oxidation-reduction process	NA
Hsym|HyS0002.173	XP_002162736.2 PREDICTED: 39S ribosomal protein L3, mitochondrial-like [Hydra vulgaris]	8.7e-106	Mitochondrial/chloroplast ribosomal protein l3	MRPL3	structural constituent of ribosome	translation	ribosome
Hsym|HyS0002.174	XP_002166870.1 PREDICTED: uncharacterized protein LOC100202494 [Hydra vulgaris]	7.1e-40	Phospholipase A2	NA	phospholipase A2 activity	arachidonic acid secretion	integral component of membrane
Hsym|HyS0002.175	XP_002159955.1 PREDICTED: uncharacterized protein LOC100203948 [Hydra vulgaris]	3.1e-43	NA	NA	NA	NA	NA
Hsym|HyS0002.176	XP_012560766.1 PREDICTED: melanocortin receptor 3-like [Hydra vulgaris]	2e-89	NA	NA	NA	NA	NA
Hsym|HyS0002.177	XP_002164852.1 PREDICTED: transmembrane protein 64-like [Hydra vulgaris]	1.3e-93	Transmembrane protein 64	TMEM64	NA	positive regulation of bone resorption	endoplasmic reticulum
Hsym|HyS0002.178	XP_002158197.1 PREDICTED: phosphoenolpyruvate carboxykinase [GTP], mitochondrial-like [Hydra vulgaris]	6.6e-276	Phosphoenolpyruvate carboxykinase, cytosolic	NA	phosphoenolpyruvate carboxykinase (GTP) activity	gluconeogenesis	cytosol
Hsym|HyS0002.179	XP_002165435.1 PREDICTED: transcription elongation factor SPT4-like [Hydra vulgaris]	3.4e-53	Transcription elongation factor SPT4 DRB sensitivity-inducing factor small subunit	SUPT4H1	zinc ion binding	positive regulation of DNA-templated transcription, elongation	nucleus
Hsym|HyS0002.180	XP_002163825.1 PREDICTED: DNA replication complex GINS protein PSF3-like [Hydra vulgaris]	4.2e-56	DNA replication complex GINS protein PSF3	GINS3	chromatin binding	DNA replication	nucleus
Hsym|HyS0002.181	XP_012553904.1 PREDICTED: nucleolar protein 6-like [Hydra vulgaris]	0	Nucleolar protein 6	NOL6	RNA binding	tRNA export from nucleus	nucleolus
Hsym|HyS0002.182	XP_002153934.1 PREDICTED: b(0,+)-type amino acid transporter 1-like [Hydra vulgaris]	1.7e-62	Solute carrier family 7 (amino acid transporter light chain, bo,+ system), member 9	NA	transmembrane transporter activity	transmembrane transport	integral component of membrane
Hsym|HyS0002.183	XP_002160096.3 PREDICTED: b(0,+)-type amino acid transporter 1-like [Hydra vulgaris]	8.9e-59	Centrosomal protein of 89 kDa	NA	transmembrane transporter activity	transmembrane transport	integral component of membrane
Hsym|HyS0002.184	XP_010766014.1 PREDICTED: purine nucleoside phosphorylase [Notothenia coriiceps]	3.6e-77	Purine nucleoside phosphorylase I, inosine and guanosine-specific	NA	purine-nucleoside phosphorylase activity	nucleoside metabolic process	cytoplasm
Hsym|HyS0002.185	XP_012555304.1 PREDICTED: probable protein disulfide-isomerase A6 [Hydra vulgaris]	4.6e-84	Thioredoxin/protein disulfide isomerase	NA	isomerase activity	cell redox homeostasis	endoplasmic reticulum
Hsym|HyS0002.186	PIK59808.1 hypothetical protein BSL78_03263 [Apostichopus japonicus]	6.8e-66	Phosphatidylinositol glycan anchor biosynthesis class S	PIGS	GPI-anchor transamidase activity	attachment of GPI anchor to protein	GPI-anchor transamidase complex
Hsym|HyS0002.187	XP_002156726.3 PREDICTED: alpha-1,6-mannosylglycoprotein 6-beta-N-acetylglucosaminyltransferase A-like isoform X1 [Hydra vulgaris]	2.4e-225	Mannoside acetylglucosaminyltransferase 5	MGAT5	alpha-1,6-mannosylglycoprotein 6-beta-N-acetylglucosaminyltransferase activity	protein N-linked glycosylation	integral component of membrane
Hsym|HyS0002.188	XP_002156726.3 PREDICTED: alpha-1,6-mannosylglycoprotein 6-beta-N-acetylglucosaminyltransferase A-like isoform X1 [Hydra vulgaris]	3e-192	Alpha-1,6-mannosylglycoprotein 6-beta-N-acetylglucosaminyltransferase A	NA	alpha-1,6-mannosylglycoprotein 6-beta-N-acetylglucosaminyltransferase activity	protein N-linked glycosylation	Golgi apparatus
Hsym|HyS0002.189	XP_002156348.2 PREDICTED: cytochrome c oxidase subunit 4 isoform 2, mitochondrial-like [Hydra vulgaris]	1.7e-29	Cytochrome c oxidase subunit 4 isoform 2, mitochondrial	COX42	cytochrome-c oxidase activity	proton transmembrane transport	mitochondrial respiratory chain complex IV
Hsym|HyS0002.190	XP_002153934.1 PREDICTED: b(0,+)-type amino acid transporter 1-like [Hydra vulgaris]	2.2e-165	Solute carrier family 7 (amino acid transporter light chain, bo,+ system), member 9	NA	transmembrane transporter activity	transmembrane transport	integral component of membrane
Hsym|HyS0002.191	XP_001637552.1 predicted protein [Nematostella vectensis]	1.6e-97	NA	NA	NA	NA	NA
Hsym|HyS0002.192	KXJ15466.1 hypothetical protein AC249_AIPGENE19858 [Exaiptasia pallida]	1.9e-40	NA	NA	NA	NA	NA
Hsym|HyS0002.193	XP_020645829.1 glycine amidinotransferase, mitochondrial [Pogona vitticeps]	1.5e-50	Glycine amidinotransferase	GATM	amidinotransferase activity	creatine biosynthetic process	mitochondrial intermembrane space
Hsym|HyS0002.194	XP_020645829.1 glycine amidinotransferase, mitochondrial [Pogona vitticeps]	1.2e-121	Glycine amidinotransferase	GATM	amidinotransferase activity	creatine biosynthetic process	mitochondrial intermembrane space
Hsym|HyS0002.195	CAF99801.1 unnamed protein product, partial [Tetraodon nigroviridis]	1e-59	Glycine amidinotransferase	GATM	amidinotransferase activity	muscle atrophy	mitochondrial intermembrane space
Hsym|HyS0002.196	KXJ29169.1 hypothetical protein AC249_AIPGENE17048 [Exaiptasia pallida]	8.5e-49	NA	NA	NA	NA	NA
Hsym|HyS0002.197	XP_020645829.1 glycine amidinotransferase, mitochondrial [Pogona vitticeps]	9.9e-56	Glycine amidinotransferase	GATM	amidinotransferase activity	muscle atrophy	mitochondrial intermembrane space
Hsym|HyS0002.198	KXJ29169.1 hypothetical protein AC249_AIPGENE17048 [Exaiptasia pallida]	1.3e-54	NA	NA	NA	NA	NA
Hsym|HyS0002.199	XP_001623586.1 predicted protein [Nematostella vectensis]	1.1e-20	NA	NA	NA	NA	NA
Hsym|HyS0002.200	XP_028403921.1 uncharacterized protein LOC114526506 [Dendronephthya gigantea]	8.2e-56	NA	NA	NA	NA	NA
Hsym|HyS0002.202	XP_020605278.1 uncharacterized protein LOC110044098, partial [Orbicella faveolata]	2e-64	NA	NA	NA	NA	NA
Hsym|HyS0002.203	XP_002159815.2 PREDICTED: vacuolar protein sorting-associated protein 4B [Hydra vulgaris]	1.6e-191	Vacuolar protein sorting-associated	NA	ATP binding	late endosomal microautophagy	Flemming body
Hsym|HyS0002.204	XP_020897780.1 kinesin-like protein KIFC3 [Exaiptasia pallida]	1.8e-148	Kinesin motor domain-containing protein (Fragment)	KIFC3	ATP-dependent microtubule motor activity, minus-end-directed	microtubule-based movement	microtubule
Hsym|HyS0002.205	XP_004211041.1 PREDICTED: tigger transposable element-derived protein 4-like [Hydra vulgaris]	0.00062	NA	NA	NA	NA	NA
Hsym|HyS0002.206	XP_012556659.1 PREDICTED: uncharacterized protein LOC105844507, partial [Hydra vulgaris]	7.4e-24	NA	NA	NA	NA	NA
Hsym|HyS0002.212	XP_027050494.1 type 2 phosphatidylinositol 4,5-bisphosphate 4-phosphatase-like [Pocillopora damicornis]	1.3e-79	Phosphatidylinositol-4,5-bisphosphate 4-phosphatase	NA	phosphatidylinositol-4,5-bisphosphate 4-phosphatase activity	phosphatidylinositol dephosphorylation	late endosome membrane
Hsym|HyS0002.213	XP_002155458.1 PREDICTED: transmembrane prolyl 4-hydroxylase-like [Hydra vulgaris]	2.9e-161	Transmembrane prolyl 4-hydroxylase	P4HTM	L-ascorbic acid binding	peptidyl-proline hydroxylation to 4-hydroxy-L-proline	endoplasmic reticulum
Hsym|HyS0002.214	XP_012559794.1 PREDICTED: uncharacterized protein LOC105846010 [Hydra vulgaris]	5.3e-66	NA	NA	NA	NA	NA
Hsym|HyS0002.215	XP_002155521.1 PREDICTED: serologically defined colon cancer antigen 3 homolog [Hydra vulgaris]	2.9e-40	NA	NA	NA	NA	NA
Hsym|HyS0002.216	XP_002156722.2 PREDICTED: U4/U6 small nuclear ribonucleoprotein Prp3-like [Hydra vulgaris]	9.7e-230	Pre-mRNA-processing factor 3	PRPF3	identical protein binding	mRNA splicing, via spliceosome	U4/U6 x U5 tri-snRNP complex
Hsym|HyS0002.217	XP_002154975.2 PREDICTED: excitatory amino acid transporter 1-like [Hydra vulgaris]	7.5e-199	Amino acid transporter	SLC1A1	symporter activity	transmembrane transport	integral component of membrane
Hsym|HyS0002.218	XP_027037478.1 sorting nexin-16-like isoform X2 [Pocillopora damicornis]	1.6e-28	NA	NA	NA	NA	NA
Hsym|HyS0002.219	XP_002156057.1 PREDICTED: RNA-binding protein 4-like isoform X1 [Hydra vulgaris]	5.8e-45	RRM domain-containing protein	NA	nucleic acid binding	NA	NA
Hsym|HyS0002.220	XP_002155428.2 PREDICTED: synaptotagmin-17-like isoform X2 [Hydra vulgaris]	8.1e-57	NA	NA	NA	NA	NA
Hsym|HyS0002.221	XP_012553566.1 PREDICTED: ankyrin repeat and SAM domain-containing protein 6-like [Hydra vulgaris]	2.3e-81	Ankyrin repeat and sterile alpha motif domain containing 6	ANKS6	ephrin receptor binding	regulation of ephrin receptor signaling pathway	NA
Hsym|HyS0002.224	RMX56687.1 hypothetical protein pdam_00024554, partial [Pocillopora damicornis]	1.4e-15	DDE-1 domain-containing protein (Fragment)	NA	nucleic acid binding	NA	NA
Hsym|HyS0002.225	XP_012565715.1 PREDICTED: uncharacterized protein LOC100214568 isoform X1 [Hydra vulgaris]	4e-22	NA	NA	NA	NA	NA
Hsym|HyS0002.226	XP_020910991.1 pre-mRNA-splicing factor ATP-dependent RNA helicase PRP16-like [Exaiptasia pallida]	0	Pre-mrna-splicing factor	DHX38	helicase activity	mRNA splicing, via spliceosome	catalytic step 2 spliceosome
Hsym|HyS0002.227	XP_012557554.1 PREDICTED: glutamate--cysteine ligase regulatory subunit-like [Hydra vulgaris]	3.5e-92	Glutamate--cysteine ligase regulatory subunit (Fragment)	NA	glutamate-cysteine ligase catalytic subunit binding	glutathione biosynthetic process	NA
Hsym|HyS0002.228	XP_020609523.1 uncharacterized protein LOC110048087 [Orbicella faveolata]	7.8e-269	Oxygen-regulated protein 1	NA	calcium ion binding	kidney development	integral component of membrane
Hsym|HyS0002.229	XP_002153804.2 PREDICTED: RNA-binding protein 3-like [Hydra vulgaris]	5.6e-22	RRM domain-containing protein	NA	nucleic acid binding	NA	NA
Hsym|HyS0002.230	XP_004208335.2 PREDICTED: N-terminal Xaa-Pro-Lys N-methyltransferase 1-like [Hydra vulgaris]	1.2e-73	Methyltransferase implicated in translation	NA	methyltransferase activity	N-terminal protein amino acid methylation	cytosol
Hsym|HyS0002.231	XP_002167960.1 PREDICTED: coiled-coil-helix-coiled-coil-helix domain-containing protein 1-like [Hydra vulgaris]	3.3e-30	NA	NA	NA	NA	NA
Hsym|HyS0002.232	ANJ59760.1 alpha carbonic anhydrase 5 [Corallium rubrum]	2.3e-51	Glycosyl-phosphatidylinositol-linked carbonic anhydrase	NA	carbonate dehydratase activity	carbon dioxide transport	cell surface
Hsym|HyS0002.233	XP_002154888.2 PREDICTED: glycine-rich RNA-binding protein 10-like isoform X1 [Hydra vulgaris]	4.7e-41	Nucleolar and coiled-body phosphoprotein 1	NA	RNA binding	axon extension	nucleus
Hsym|HyS0002.234	XP_002154192.1 PREDICTED: COMM domain-containing protein 4-like [Hydra vulgaris]	3.9e-62	COMM domain-containing protein 4	COMMD4	NA	NA	cytoplasm
Hsym|HyS0002.235	XP_004208685.1 PREDICTED: peroxisomal membrane protein PEX14-like [Hydra vulgaris]	2.7e-51	Peroxisomal membrane protein PEX14 (Fragment)	NA	protein binding, bridging	protein import into peroxisome matrix, docking	peroxisomal membrane
Hsym|HyS0002.236	XP_012558375.1 PREDICTED: NADH dehydrogenase [ubiquinone] 1 alpha subcomplex assembly factor 5-like [Hydra vulgaris]	8.6e-118	S-adenosyl-L-methionine-dependent methyltransferase	NDUFAF5	methyltransferase activity	methylation	extrinsic component of mitochondrial inner membrane
Hsym|HyS0002.237	XP_012564774.1 PREDICTED: alanine aminotransferase 2-like [Hydra vulgaris]	2.6e-202	Alanine aminotransferase	GPT2	pyridoxal phosphate binding	biosynthetic process	mediator complex
Hsym|HyS0002.238	XP_012564219.1 PREDICTED: FACT complex subunit SPT16-like [Hydra vulgaris]	0	FACT complex large subunit	SUPT16H	nucleosome binding	DNA replication-independent nucleosome organization	FACT complex
Hsym|HyS0002.239	XP_004211756.2 PREDICTED: glutathione S-transferase A-like [Hydra vulgaris]	3.4e-86	Rho-class glutathione S-transferase	NA	glutathione transferase activity	glutathione metabolic process	cytoplasm
Hsym|HyS0002.240	XP_004211756.2 PREDICTED: glutathione S-transferase A-like [Hydra vulgaris]	1.3e-80	Rho-class glutathione S-transferase	NA	glutathione transferase activity	glutathione metabolic process	cytoplasm
Hsym|HyS0002.241	XP_004211756.2 PREDICTED: glutathione S-transferase A-like [Hydra vulgaris]	5.4e-76	Rho-class glutathione S-transferase	NA	glutathione transferase activity	glutathione metabolic process	cytoplasm
Hsym|HyS0002.242	XP_002154534.3 PREDICTED: transmembrane prolyl 4-hydroxylase-like [Hydra vulgaris]	2.1e-149	Transmembrane prolyl 4-hydroxylase	P4HTM	L-ascorbic acid binding	peptidyl-proline hydroxylation to 4-hydroxy-L-proline	endoplasmic reticulum
Hsym|HyS0002.243	KXJ21733.1 Peroxidasin-like [Exaiptasia pallida]	1.3e-115	Peroxidasin	PXDN	peroxidase activity	response to oxidative stress	extracellular space
Hsym|HyS0002.244	XP_014672322.1 PREDICTED: uncharacterized protein LOC106812853 [Priapulus caudatus]	4.2e-33	NA	NA	NA	NA	NA
Hsym|HyS0002.245	XP_022107154.1 uncharacterized protein LOC110988171 [Acanthaster planci]	8.1e-12	NA	NA	NA	NA	NA
Hsym|HyS0002.246	XP_022800640.1 peroxidasin homolog isoform X3 [Stylophora pistillata]	1.2e-127	Nuclear cap-binding protein subunit 1	MLT-7	peroxidase activity	response to oxidative stress	extracellular region part
Hsym|HyS0002.247	XP_020624234.1 uncharacterized protein LOC110061727 isoform X1 [Orbicella faveolata]	3.3e-118	Animal haem peroxidase	TPO	iodide peroxidase activity	thyroid hormone generation	extracellular space
Hsym|HyS0002.249	XP_027037408.1 dual specificity protein phosphatase 19-like [Pocillopora damicornis]	8.5e-36	Dual specificity protein phosphatase	DUSP19	protein tyrosine/serine/threonine phosphatase activity	protein dephosphorylation	cytoplasm
Hsym|HyS0002.250	XP_012563959.1 PREDICTED: uncharacterized protein LOC105848400, partial [Hydra vulgaris]	1.2e-40	DNA polymerase III subunit epsilon	DNAQ	exonuclease activity	DNA replication	NA
Hsym|HyS0002.251	XP_012562252.1 PREDICTED: tripartite motif-containing protein 2-like [Hydra vulgaris]	3.6e-23	Peptidase C13, legumain	NA	peptidase activity	proteolysis	NA
Hsym|HyS0002.252	XP_019634933.1 PREDICTED: apoptosis-inducing factor 2-like [Branchiostoma belcheri]	8e-69	NADH dehydrogenase	YJLD	electron-transferring-flavoprotein dehydrogenase activity	apoptotic mitochondrial changes	mitochondrion
Hsym|HyS0002.253	XP_012563991.1 PREDICTED: centrosomal protein of 192 kDa-like [Hydra vulgaris]	0	Centrosomal protein 192	NA	NA	centrosome-templated microtubule nucleation	NA
Hsym|HyS0002.256	XP_012554981.1 PREDICTED: RNA-binding protein 39-like isoform X1 [Hydra vulgaris]	7.5e-177	Splicing factor	NA	RNA binding	mRNA processing	nucleus
Hsym|HyS0002.257	XP_002158070.2 PREDICTED: organic cation transporter protein-like [Hydra vulgaris]	3.8e-80	NA	NA	NA	NA	NA
Hsym|HyS0002.258	XP_004210763.2 PREDICTED: solute carrier family 22 member 4-like [Hydra vulgaris]	3.3e-84	NA	NA	NA	NA	NA
Hsym|HyS0002.259	XP_002158070.2 PREDICTED: organic cation transporter protein-like [Hydra vulgaris]	6.1e-126	MFS domain-containing protein (Fragment)	NA	transmembrane transporter activity	transmembrane transport	integral component of plasma membrane
Hsym|HyS0002.260	XP_002156184.1 PREDICTED: PQ-loop repeat-containing protein 1-like [Hydra vulgaris]	6.1e-111	PQ-loop repeat-containing	PQLC1	NA	phospholipid translocation	integral component of membrane
Hsym|HyS0002.261	XP_002167361.2 PREDICTED: contactin-associated protein-like 4 [Hydra vulgaris]	3.3e-211	NA	NA	NA	NA	NA
Hsym|HyS0002.262	XP_020901585.1 charged multivesicular body protein 4b-like [Exaiptasia pallida]	4.3e-73	VAMP associated protein B and C	CHMP4B	protein homodimerization activity	vacuolar transport	endosome membrane
Hsym|HyS0002.264	XP_004212798.2 PREDICTED: maestro heat-like repeat-containing protein family member 1 [Hydra vulgaris]	0	Dual specificity protein phosphatase 23	NA	NA	NA	integral component of membrane
Hsym|HyS0002.265	XP_012558265.1 PREDICTED: xylulose kinase-like [Hydra vulgaris]	4.9e-176	Macrophage colony-stimulating factor 1	XYLB	xylulokinase activity	D-xylose metabolic process	cytosol
Hsym|HyS0002.266	XP_002159063.2 PREDICTED: putative ATP-dependent RNA helicase DHX33 [Hydra vulgaris]	1.2e-243	Pre-mRNA-splicing factor ATP-dependent RNA helicase DEAH10	DHX33	helicase activity	regulation of transcription by RNA polymerase I	NLRP3 inflammasome complex
Hsym|HyS0002.267	XP_012561902.1 PREDICTED: tyrosine-protein phosphatase non-receptor type 1-like isoform X1 [Hydra vulgaris]	1e-107	Tyrosine-protein phosphatase non-receptor type	NA	protein tyrosine phosphatase activity	peptidyl-tyrosine dephosphorylation	intrinsic component of membrane
Hsym|HyS0002.268	XP_012564344.1 PREDICTED: F-box only protein 21-like [Hydra vulgaris]	1.8e-110	Transglutaminase	NA	DNA binding	NA	NA
Hsym|HyS0002.269	NP_001267116.1 Bardet-Biedl syndrome 4 protein [Pan troglodytes]	6.2e-130	Bardet-Biedl syndrome 4	BBS4	dynactin binding	negative regulation of appetite by leptin-mediated signaling pathway	pericentriolar material
Hsym|HyS0002.270	ARF08707.1 putative UDP-glucose 6-dehydrogenase [Catovirus CTV1]	4.5e-87	UDP-glucose 6-dehydrogenase	NA	NAD binding	oxidation-reduction process	integral component of membrane
Hsym|HyS0002.271	XP_002160043.1 PREDICTED: uncharacterized protein LOC100210142 [Hydra vulgaris]	1.7e-76	Nematogalectin B	NA	carbohydrate binding	NA	nematocyst
Hsym|HyS0002.272	XP_004208646.1 PREDICTED: uncharacterized protein LOC100201983 [Hydra vulgaris]	5.5e-72	SUEL-type lectin domain-containing protein	NA	carbohydrate binding	NA	NA
Hsym|HyS0002.275	XP_002165244.2 PREDICTED: nucleoporin GLE1-like [Hydra vulgaris]	5e-123	GLE1 RNA export mediator homolog (yeast)	GLE1	inositol hexakisphosphate binding	poly(A)+ mRNA export from nucleus	nuclear pore
Hsym|HyS0002.276	XP_022794077.1 lysine--tRNA ligase-like [Stylophora pistillata]	4.6e-236	Lysine--tRNA ligase	KARS	lysine-tRNA ligase activity	lysyl-tRNA aminoacylation	cytoplasm
Hsym|HyS0002.277	XP_012555566.1 PREDICTED: solute carrier family 12 member 6 isoform X2 [Hydra vulgaris]	0	Blast:Solute carrier family 12 member 6	NA	potassium:chloride symporter activity	cellular hypotonic salinity response	integral component of plasma membrane
Hsym|HyS0002.278	XP_012555259.1 PREDICTED: contactin-associated protein like 5-3-like [Hydra vulgaris]	1.1e-144	NA	NA	NA	NA	NA
Hsym|HyS0002.280	BAJ22672.1 nematogalectin-related [Hydra viridissima]	5.6e-80	Macrophage receptor MARCO	NA	carbohydrate binding	glomerular basement membrane development	collagen trimer
Hsym|HyS0002.281	XP_012553474.1 PREDICTED: nematogalectin isoform X1 [Hydra vulgaris]	1.1e-93	C-terminal tandem repeated domain in type 4 procollagen	NA	extracellular matrix structural constituent	collagen-activated tyrosine kinase receptor signaling pathway	collagen trimer
Hsym|HyS0002.282	XP_012553528.1 PREDICTED: calbindin-32-like [Hydra vulgaris]	9.8e-15	Calretinin	NA	calcium ion binding	regulation of presynaptic cytosolic calcium ion concentration	dendrite
Hsym|HyS0002.283	XP_012564451.1 PREDICTED: probable thiopurine S-methyltransferase [Hydra vulgaris]	1e-48	NA	NA	NA	NA	NA
Hsym|HyS0002.284	XP_012564450.1 PREDICTED: probable thiopurine S-methyltransferase [Hydra vulgaris]	1.6e-43	NA	NA	NA	NA	NA
Hsym|HyS0002.285	XP_002168220.2 PREDICTED: glycerophosphodiester phosphodiesterase 1-like [Hydra vulgaris]	2.2e-86	Glycerophosphoryl diester phosphodiesterase	NA	phosphoric diester hydrolase activity	lipid metabolic process	integral component of membrane
Hsym|HyS0002.286	XP_012555691.1 PREDICTED: mediator of RNA polymerase II transcription subunit 23-like [Hydra vulgaris]	0	Mediator of RNA polymerase II transcription subunit 23	MED23	ubiquitin protein ligase activity	positive regulation of gene expression	transcription factor complex
Hsym|HyS0002.288	XP_002159552.2 PREDICTED: external alternative NAD(P)H-ubiquinone oxidoreductase B1, mitochondrial-like [Hydra vulgaris]	2.9e-169	External alternative NADH-ubiquinone oxidoreductase	NA	calcium ion binding	oxidation-reduction process	extrinsic component of mitochondrial inner membrane
Hsym|HyS0002.289	XP_012556506.1 PREDICTED: uncharacterized protein LOC100199700 [Hydra vulgaris]	1.5e-127	Thrombospondin-1	NA	extracellular matrix binding	negative regulation of angiogenesis	extracellular space
Hsym|HyS0002.290	XP_020620648.1 lipase maturation factor 2-like [Orbicella faveolata]	3.6e-180	Lipase maturation factor	LMF2	NA	protein maturation	endoplasmic reticulum membrane
Hsym|HyS0002.291	XP_002155446.2 PREDICTED: ER degradation-enhancing alpha-mannosidase-like protein 2 [Hydra vulgaris]	1.2e-222	ER degradation-enhancing alpha-mannosidase-like protein 2	EDEM2	mannosyl-oligosaccharide 1,2-alpha-mannosidase activity	trimming of terminal mannose on B branch	endoplasmic reticulum quality control compartment
Hsym|HyS0002.292	XP_002167506.3 PREDICTED: cysteine desulfurase, mitochondrial [Hydra vulgaris]	3.6e-204	Pyridoxal phosphate-dependent transferase	NFS1	cysteine desulfurase activity	[2Fe-2S] cluster assembly	L-cysteine desulfurase complex
Hsym|HyS0002.293	PIK48035.1 hypothetical protein BSL78_15097 [Apostichopus japonicus]	3.6e-11	NA	NA	NA	NA	NA
Hsym|HyS0002.297	XP_028414711.1 uncharacterized protein LOC114537812 [Dendronephthya gigantea]	1.4e-51	NA	NA	NA	NA	NA
Hsym|HyS0002.298	XP_011426585.1 PREDICTED: P2X purinoceptor 7-like [Crassostrea gigas]	1e-24	NA	NA	NA	NA	NA
Hsym|HyS0002.299	XP_004207272.1 PREDICTED: neurexin-1b-like [Hydra vulgaris]	1.8e-80	NA	NA	NA	NA	NA
Hsym|HyS0002.300	XP_028401255.1 uncharacterized protein LOC114524364 [Dendronephthya gigantea]	2.7e-40	NA	NA	NA	NA	NA
Hsym|HyS0002.302	ELU13350.1 hypothetical protein CAPTEDRAFT_186024 [Capitella teleta]	0.00044	NA	NA	NA	NA	NA
Hsym|HyS0002.303	XP_012560923.1 PREDICTED: uncharacterized protein LOC105846575 [Hydra vulgaris]	6.5e-25	NA	NA	NA	NA	NA
Hsym|HyS0002.304	PVU93144.1 hypothetical protein BB559_003414 [Furculomyces boomerangus]	2.3e-19	NA	NA	NA	NA	NA
Hsym|HyS0002.305	XP_002155561.2 PREDICTED: glucose-fructose oxidoreductase domain-containing protein 2-like [Hydra vulgaris]	4.2e-170	Glucose-fructose oxidoreductase domain-containing protein 2	GFOD1	oxidoreductase activity	oxidation-reduction process	integral component of membrane
Hsym|HyS0002.306	XP_012557877.1 PREDICTED: beta-1-syntrophin-like [Hydra vulgaris]	6.8e-196	LOW QUALITY PROTEIN: beta-1-syntrophin	SNTB1	structural molecule activity	synapse organization	synapse
Hsym|HyS0002.307	XP_002163518.2 PREDICTED: nudC domain-containing protein 1-like [Hydra vulgaris]	7.2e-117	NudC domain-containing protein 1	NUDCD1	NA	NA	NA
Hsym|HyS0002.308	XP_002161197.2 PREDICTED: ER membrane protein complex subunit 8-like [Hydra vulgaris]	1.2e-69	ER membrane protein complex subunit 8	EMC8	methionine adenosyltransferase activity	S-adenosylmethionine biosynthetic process	ER membrane protein complex
Hsym|HyS0002.309	XP_002156886.3 PREDICTED: repressor of RNA polymerase III transcription MAF1 homolog [Hydra vulgaris]	9.3e-90	Repressor of RNA polymerase III transcription MAF1	MAF1	RNA polymerase III core binding	negative regulation of transcription by RNA polymerase III	nucleus
Hsym|HyS0002.311	XP_002164301.2 PREDICTED: membrane-bound transcription factor site-1 protease-like [Hydra vulgaris]	0	Membrane-bound transcription factor peptidase site 1	MBTPS1	serine-type endopeptidase activity	proteolysis	Golgi stack
Hsym|HyS0002.312	PFX24545.1 hypothetical protein AWC38_SpisGene10853 [Stylophora pistillata]	5.6e-77	ZAD domain-containing protein	NA	zinc ion binding	NA	nucleus
Hsym|HyS0002.314	KXJ14672.1 hypothetical protein AC249_AIPGENE20498 [Exaiptasia pallida]	9.4e-12	NA	NA	NA	NA	NA
Hsym|HyS0002.315	XP_015777831.1 PREDICTED: LOW QUALITY PROTEIN: uncharacterized protein LOC107355764 [Acropora digitifera]	2.7e-23	NA	NA	NA	NA	NA
Hsym|HyS0002.316	XP_015777831.1 PREDICTED: LOW QUALITY PROTEIN: uncharacterized protein LOC107355764 [Acropora digitifera]	2.7e-23	NA	NA	NA	NA	NA
Hsym|HyS0002.317	XP_020626097.1 uncharacterized protein LOC110063458 [Orbicella faveolata]	7.6e-69	HECT domain-containing protein	NA	ubiquitin-protein transferase activity	protein ubiquitination	NA
Hsym|HyS0002.318	XP_002169136.2 PREDICTED: mitochondrial inner membrane protein OXA1L-like [Hydra vulgaris]	4.4e-08	NA	NA	NA	NA	NA
Hsym|HyS0002.319	XP_004207064.1 PREDICTED: peptidyl-prolyl cis-trans isomerase FKBP9-like [Hydra vulgaris]	2.7e-89	FKBP-type peptidyl-prolyl cis-trans isomerase FklB	NA	peptidyl-prolyl cis-trans isomerase activity	protein peptidyl-prolyl isomerization	sarcoplasmic reticulum
Hsym|HyS0002.320	XP_022785291.1 N-acetylgalactosamine-6-sulfatase-like [Stylophora pistillata]	6.4e-197	N-acetylgalactosamine-6-sulfatase	GALNS	N-acetylgalactosamine-6-sulfatase activity	keratan sulfate catabolic process	lysosome
Hsym|HyS0002.321	XP_028392873.1 radial spoke head 10 homolog B-like [Dendronephthya gigantea]	9.2e-47	Membrance occupation and recognition nexus protein 1	NA	mismatched DNA binding	mismatch repair	mismatch repair complex
Hsym|HyS0002.322	KXJ26672.1 Steroid 17-alpha-hydroxylase/17,20 lyase [Exaiptasia pallida]	1.1e-149	Steroid 17-alpha-hydroxylase/17,20 lyase	NA	oxidoreductase activity, acting on paired donors, with incorporation or reduction of molecular oxygen	oxidation-reduction process	integral component of membrane
Hsym|HyS0002.323	XP_002162187.3 PREDICTED: DNA topoisomerase I, mitochondrial-like [Hydra vulgaris]	1.2e-209	DNA topoisomerase I	NA	DNA topoisomerase type I activity	DNA topological change	chromosome
Hsym|HyS0002.324	XP_020630904.1 F-actin-uncapping protein LRRC16A-like [Orbicella faveolata]	4.9e-149	NA	NA	NA	NA	NA
Hsym|HyS0002.325	XP_004210256.2 PREDICTED: serine/threonine-protein phosphatase 4 regulatory subunit 1-like [Hydra vulgaris]	9.2e-181	Serine/threonine-protein phosphatase 4 regulatory subunit 1	NA	protein phosphatase regulator activity	regulation of phosphoprotein phosphatase activity	protein phosphatase 4 complex
Hsym|HyS0002.327	XP_002164077.2 PREDICTED: derlin-1-like [Hydra vulgaris]	8.4e-110	Derlin	DERL1	ubiquitin-specific protease binding	response to unfolded protein	endoplasmic reticulum membrane
Hsym|HyS0002.328	NP_001274282.1 uncharacterized protein LOC100211719 precursor [Hydra vulgaris]	1.4e-42	NA	NA	NA	NA	NA
Hsym|HyS0002.329	XP_012559752.1 PREDICTED: geranylgeranyl transferase type-2 subunit alpha-like, partial [Hydra vulgaris]	1.1e-87	Rab geranylgeranyltransferase subunit alpha	RABGGTA	Rab geranylgeranyltransferase activity	protein geranylgeranylation	Rab-protein geranylgeranyltransferase complex
Hsym|HyS0002.330	XP_020610915.1 tubulin polymerization-promoting protein family member 2-like [Orbicella faveolata]	2.3e-50	Tubulin polymerization-promoting protein family member 2	NA	tubulin binding	microtubule bundle formation	microtubule bundle
Hsym|HyS0002.331	PVD24050.1 hypothetical protein C0Q70_14519 [Pomacea canaliculata]	6.8e-11	NA	NA	NA	NA	NA
Hsym|HyS0002.332	XP_028415388.1 uncharacterized protein LOC114538408 isoform X1 [Dendronephthya gigantea]	2.7e-30	NA	NA	NA	NA	NA
Hsym|HyS0002.334	XP_002157293.3 PREDICTED: vacuolar protein sorting-associated protein 4-like [Hydra vulgaris]	7.1e-125	Salt-induced AAA-Type ATPase	NA	ATP binding	vacuole organization	multivesicular body
Hsym|HyS0002.335	XP_002155452.1 PREDICTED: ras-related protein Rab-2 [Hydra vulgaris]	1.5e-107	Ras protein Rab 2	NA	GTPase activity	Rab protein signal transduction	Golgi apparatus
Hsym|HyS0002.336	XP_012561295.1 PREDICTED: calcium-transporting ATPase type 2C member 1-like [Hydra vulgaris]	0	Calcium-transporting ATPase	ATP2C1	calcium transmembrane transporter activity, phosphorylative mechanism	calcium ion transmembrane transport	trans-Golgi network
Hsym|HyS0002.337	XP_012553528.1 PREDICTED: calbindin-32-like [Hydra vulgaris]	8.8e-76	Vitamin D-dependent calcium-binding protein, avian-type	CALB1	calcium ion binding involved in regulation of postsynaptic cytosolic calcium ion concentration	calcium ion homeostasis	hippocampal mossy fiber to CA3 synapse
Hsym|HyS0002.339	XP_020622613.1 protein HOS4-like [Orbicella faveolata]	1.5e-39	NA	NA	NA	NA	NA
Hsym|HyS0002.340	XP_012559850.1 PREDICTED: VPS9 domain-containing protein 1-like [Hydra vulgaris]	2.3e-101	VPS9 domain-containing protein 1	VPS9D1	NA	NA	NA
Hsym|HyS0002.341	XP_002166854.3 PREDICTED: short transient receptor potential channel 4-associated protein-like [Hydra vulgaris]	3.9e-185	Short transient receptor potential	TRPC4AP	phosphatase binding	ubiquitin-dependent protein catabolic process	Cul4A-RING E3 ubiquitin ligase complex
Hsym|HyS0002.342	XP_002165462.1 PREDICTED: E3 ubiquitin-protein ligase AMFR-like, partial [Hydra vulgaris]	5.3e-150	Autocrine motility factor receptor b	AMFR	ubiquitin protein ligase activity	protein polyubiquitination	endoplasmic reticulum
Hsym|HyS0002.344	XP_012557669.1 PREDICTED: dual specificity protein phosphatase 22-like [Hydra vulgaris]	4.6e-61	Dual specificity phosphatase	NA	protein tyrosine/serine/threonine phosphatase activity	protein dephosphorylation	cytosol
Hsym|HyS0002.345	XP_012554402.1 PREDICTED: heat shock factor protein-like isoform X1 [Hydra vulgaris]	3.8e-71	Heat shock factor-type transcription factor	HSF	sequence-specific DNA binding	regulation of transcription, DNA-templated	nucleus
Hsym|HyS0002.346	XP_020906501.1 uncharacterized protein LOC110244635 isoform X1 [Exaiptasia pallida]	3.4e-39	NA	NA	NA	NA	NA
Hsym|HyS0002.347	WP_072304022.1 hypothetical protein [Cellulophaga fucicola]	1.7e-12	NA	NA	NA	NA	NA
Hsym|HyS0002.349	XP_002156696.3 PREDICTED: transcription factor 25-like [Hydra vulgaris]	9e-143	Transcription factor	TCF25	DNA-binding transcription factor activity	negative regulation of transcription by RNA polymerase II	nucleus
Hsym|HyS0002.350	XP_012562105.1 PREDICTED: probable ATP-dependent RNA helicase DDX27 [Hydra vulgaris]	5.3e-218	ATP dependent RNA helicase	DDX27	helicase activity	rRNA processing	nucleolus
Hsym|HyS0002.351	XP_002163708.2 PREDICTED: bromodomain-containing protein 7-like [Hydra vulgaris]	4e-121	Bromodomain-containing protein 7	NA	NA	NA	NA
Hsym|HyS0002.352	XP_002163720.2 PREDICTED: serine/threonine-protein kinase ULK4 [Hydra vulgaris]	0	Serine/threonine protein kinase	ULK4	protein kinase activity	protein phosphorylation	integral component of membrane
Hsym|HyS0002.353	XP_002157284.1 PREDICTED: MOB kinase activator 2-like [Hydra vulgaris]	4.9e-77	Serine/threonine-protein phosphatase	NA	kinase activity	phosphorylation	Sid2-Mob1 complex
Hsym|HyS0002.354	XP_002157509.2 PREDICTED: FH1/FH2 domain-containing protein 3-like isoform X1 [Hydra vulgaris]	0	Formin homology 2 domain containing 3	FHOD3	NA	actin filament organization	NA
Hsym|HyS0002.355	XP_020628323.1 protein phosphatase 1 regulatory subunit 32-like isoform X2 [Orbicella faveolata]	4.6e-90	Protein phosphatase 1 regulatory subunit 32	NA	phosphatase binding	NA	NA
Hsym|HyS0002.356	XP_028403014.1 testis-expressed protein 43-like [Dendronephthya gigantea]	1.5e-17	NA	NA	NA	NA	NA
Hsym|HyS0002.357	RMX56804.1 hypothetical protein pdam_00009925, partial [Pocillopora damicornis]	1.9e-101	Protein phosphatase 1 regulatory subunit 32	NA	phosphatase binding	NA	NA
Hsym|HyS0002.358	XP_002160485.2 PREDICTED: sodium/hydrogen exchanger 8 [Hydra vulgaris]	2e-210	Sodium/hydrogen exchanger	NA	sodium:proton antiporter activity	regulation of pH	integral component of membrane
Hsym|HyS0002.359	XP_012561350.1 PREDICTED: protein odr-4 homolog [Hydra vulgaris]	7.3e-115	NA	NA	NA	NA	NA
Hsym|HyS0002.360	XP_002160357.2 PREDICTED: tRNA-specific adenosine deaminase 1-like isoform X1 [Hydra vulgaris]	2.1e-94	tRNA-specific adenosine deaminase	ADAT1	adenosine deaminase activity	RNA processing	NA
Hsym|HyS0002.362	XP_012555642.1 PREDICTED: sodium- and chloride-dependent transporter XTRP3A-like [Hydra vulgaris]	3.4e-204	Transporter	NA	neurotransmitter:sodium symporter activity	neurotransmitter transport	integral component of plasma membrane
Hsym|HyS0002.363	XP_022794877.1 uncharacterized protein LOC111333545, partial [Stylophora pistillata]	6e-14	NA	NA	NA	NA	NA
Hsym|HyS0002.364	NP_001274282.1 uncharacterized protein LOC100211719 precursor [Hydra vulgaris]	6.8e-31	NA	NA	NA	NA	NA
Hsym|HyS0002.365	NP_001274282.1 uncharacterized protein LOC100211719 precursor [Hydra vulgaris]	8.8e-31	NA	NA	NA	NA	NA
Hsym|HyS0002.366	XP_004205690.2 PREDICTED: histamine H2 receptor-like [Hydra vulgaris]	7.5e-28	NA	NA	NA	NA	NA
Hsym|HyS0002.367	XP_022786661.1 ankyrin repeat domain-containing protein 60-like [Stylophora pistillata]	1e-40	NA	NA	NA	NA	NA
Hsym|HyS0002.368	XP_012555642.1 PREDICTED: sodium- and chloride-dependent transporter XTRP3A-like [Hydra vulgaris]	3.4e-204	Transporter	NA	neurotransmitter:sodium symporter activity	neurotransmitter transport	integral component of plasma membrane
Hsym|HyS0002.370	NP_001274282.1 uncharacterized protein LOC100211719 precursor [Hydra vulgaris]	2.8e-42	NA	NA	NA	NA	NA
Hsym|HyS0002.371	NP_001274282.1 uncharacterized protein LOC100211719 precursor [Hydra vulgaris]	1.1e-49	Endonuclease/exonuclease/phosphatase family protein	NA	exonuclease activity	nucleic acid phosphodiester bond hydrolysis	NA
Hsym|HyS0002.372	XP_004205690.2 PREDICTED: histamine H2 receptor-like [Hydra vulgaris]	5.7e-28	NA	NA	NA	NA	NA
Hsym|HyS0002.374	XP_020894120.1 uncharacterized protein LOC110233193 [Exaiptasia pallida]	6.8e-30	NA	NA	NA	NA	NA
Hsym|HyS0002.375	XP_012565652.1 PREDICTED: uncharacterized protein LOC105849761 [Hydra vulgaris]	1.2e-20	ankyrin repeat domain-containing protein 12	BARD1	protein homodimerization activity	negative regulation of protein export from nucleus	BRCA1-BARD1 complex
Hsym|HyS0002.376	XP_002160350.1 PREDICTED: gem-associated protein 2-like [Hydra vulgaris]	1.4e-48	Survival of motor neuron protein-interacting protein 1 (Fragment)	NA	NA	NA	NA
Hsym|HyS0002.377	XP_002157605.1 PREDICTED: factor VIII intron 22 protein-like [Hydra vulgaris]	1.5e-108	Coagulation factor VIII-associated 2	F8A2	NA	NA	integral component of membrane
Hsym|HyS0002.378	XP_002164309.1 PREDICTED: myophilin-like [Hydra vulgaris]	8.9e-78	Alpha-galactosidase	NA	actin binding	actomyosin structure organization	NA
Hsym|HyS0002.379	XP_002164309.1 PREDICTED: myophilin-like [Hydra vulgaris]	2e-77	Alpha-galactosidase	NA	actin binding	actomyosin structure organization	mismatch repair complex
Hsym|HyS0002.380	XP_002160638.1 PREDICTED: nitrogen permease regulator 2-like protein [Hydra vulgaris]	1.9e-140	Tumor suppressor candidate	NA	oxidoreductase activity	cellular response to nitrogen starvation	GATOR1 complex
Hsym|HyS0002.381	CAD61084.1 SI:dZ46M7.2 (novel kinase), partial [Danio rerio]	1e-74	Tyrosine-protein kinase receptor UFO	TYRO3	protein tyrosine kinase activity	peptidyl-tyrosine phosphorylation	cell surface
Hsym|HyS0002.382	XP_002167479.3 PREDICTED: uncharacterized protein LOC100211486 [Hydra vulgaris]	2.9e-98	NA	NA	NA	NA	NA
Hsym|HyS0002.383	XP_006814446.1 PREDICTED: zinc finger protein 862-like [Saccoglossus kowalevskii]	6.1e-06	NA	NA	NA	NA	NA
Hsym|HyS0002.384	XP_002155766.3 PREDICTED: ATP-dependent RNA helicase DDX1-like [Hydra vulgaris]	0	DEAD box ATP-dependent RNA helicase	DDX1	helicase activity	tRNA splicing, via endonucleolytic cleavage and ligation	tRNA-splicing ligase complex
Hsym|HyS0002.386	XP_022785480.1 LOW QUALITY PROTEIN: transient receptor potential cation channel subfamily M member 6-like [Stylophora pistillata]	1.9e-14	NA	NA	NA	NA	NA
Hsym|HyS0002.387	GBG29381.1 Dynein heavy chain, cytoplasmic [Hondaea fermentalgiana]	3e-182	Midasin	NA	ATPase activity	ribosomal large subunit assembly	nucleus
Hsym|HyS0002.388	PNW86786.1 hypothetical protein CHLRE_02g095550v5 [Chlamydomonas reinhardtii]	2.9e-43	Elongation factor-2 kinase	NA	translation elongation factor activity	translational elongation	NA
Hsym|HyS0002.389	XP_002157103.2 PREDICTED: nose resistant to fluoxetine protein 6-like [Hydra vulgaris]	1.8e-134	Nose resistant to fluoxetine protein 6	NA	transferase activity, transferring acyl groups other than amino-acyl groups	regulation of apoptotic process	integral component of membrane
Hsym|HyS0002.390	XP_012558982.1 PREDICTED: nose resistant to fluoxetine protein 6-like [Hydra vulgaris]	4.5e-12	NA	NA	NA	NA	NA
Hsym|HyS0002.391	XP_002160619.2 PREDICTED: apoptotic chromatin condensation inducer in the nucleus-like [Hydra vulgaris]	1e-73	Apoptotic chromatin condensation inducer in the nucleus	NA	RNA binding	regulation of mRNA processing	nucleus
Hsym|HyS0002.392	XP_002153873.2 PREDICTED: nuclear receptor coactivator 5-like [Hydra vulgaris]	5.3e-110	Nuclear receptor coactivator 5	NA	RNA binding	NAD biosynthetic process	NA
Hsym|HyS0002.393	XP_002164415.1 PREDICTED: uncharacterized protein LOC100198727 isoform X1 [Hydra vulgaris]	3.2e-171	Streptomycin biosynthesis protein StrI	NA	oxidoreductase activity	oxidation-reduction process	nucleus
Hsym|HyS0002.394	XP_002167018.3 PREDICTED: ATP-binding cassette sub-family B member 9-like [Hydra vulgaris]	4.6e-210	ATP-binding cassette sub-family B member 9 (inferred by orthology to a human protein)	ABCB9	ATPase-coupled peptide transmembrane transporter activity	peptide transport	lysosomal membrane
Hsym|HyS0002.395	XP_002155488.2 PREDICTED: uncharacterized protein C18orf8 homolog [Hydra vulgaris]	2.7e-248	Tyrosine--tRNA ligase	NA	tyrosine-tRNA ligase activity	regulation of autophagy	Mon1-Ccz1 complex
Hsym|HyS0002.396	XP_002154174.2 PREDICTED: transcription factor E2F5-like [Hydra vulgaris]	5.4e-125	Engulfment and cell motility 3	E2F5	protein dimerization activity	mitotic cell cycle	transcription factor complex
Hsym|HyS0002.398	XP_012566192.1 PREDICTED: tumor protein p53-inducible nuclear protein 2-like [Hydra vulgaris]	1.2e-37	Tumor protein p53 inducible nuclear protein 1	NA	antioxidant activity	negative regulation of cell population proliferation	autophagosome
Hsym|HyS0002.399	XP_012564083.1 PREDICTED: uncharacterized protein LOC105848502 [Hydra vulgaris]	2.1e-52	Sorting nexin-21	NA	phosphatidylinositol binding	protein transport	NA
Hsym|HyS0002.402	XP_020893838.1 zinc metalloproteinase nas-14-like [Exaiptasia pallida]	2.2e-147	Meprin A subunit beta	MEP1B	metalloendopeptidase activity	proteolysis	meprin A complex
Hsym|HyS0002.403	XP_023220888.1 uncharacterized protein LOC111622699 [Centruroides sculpturatus]	1.3e-218	Aminopeptidase	NA	aminopeptidase activity	proteolysis	cytoplasm
Hsym|HyS0002.405	XP_002163302.1 PREDICTED: small nuclear ribonucleoprotein Sm D1-like [Hydra vulgaris]	5.9e-41	Small nuclear ribonucleoprotein Sm D1	SNRPD1	U1 snRNP binding	spliceosomal snRNP assembly	nucleus
Hsym|HyS0002.406	XP_002156681.3 PREDICTED: vesicle-associated membrane protein-associated protein B-like [Hydra vulgaris]	9.9e-56	Vamp vesicle associated membrane protein associated protein a	NA	FFAT motif binding	protein localization to endoplasmic reticulum	endoplasmic reticulum membrane
Hsym|HyS0002.407	XP_012554603.1 PREDICTED: uncharacterized protein LOC100208285 [Hydra vulgaris]	0	Putative cadherin egf lag seven-pass g-type receptor	NA	calcium ion binding	Notch signaling pathway	integral component of membrane
Hsym|HyS0002.408	XP_002155877.1 PREDICTED: NADH dehydrogenase [ubiquinone] iron-sulfur protein 6, mitochondrial-like [Hydra vulgaris]	4.2e-38	NADH dehydrogenase [ubiquinone] iron-sulfur protein 6, mitochondrial	NA	NA	mitochondrial electron transport, NADH to ubiquinone	mitochondrial respiratory chain complex I
Hsym|HyS0002.409	XP_002164471.1 PREDICTED: CCR4-NOT transcription complex subunit 11-like [Hydra vulgaris]	3.1e-187	LOW QUALITY PROTEIN: CCR4-NOT transcription complex subunit 11	CNOT11	GTPase activity	regulation of translation	CCR4-NOT complex
Hsym|HyS0002.411	XP_020630718.1 uncharacterized protein LOC110067697 [Orbicella faveolata]	7.6e-25	NA	NA	NA	NA	NA
Hsym|HyS0002.413	AAQ96732.1 bzip transcription factor MafL [Podocoryna carnea]	2e-66	BZIP transcription factor L-Maf	NA	DNA-binding transcription factor activity	regulation of transcription, DNA-templated	nucleus
Hsym|HyS0002.415	XP_015762688.1 PREDICTED: uncharacterized protein LOC107341737 isoform X1 [Acropora digitifera]	3.8e-09	NA	NA	NA	NA	NA
Hsym|HyS0002.417	RLN88747.1 hypothetical protein BBJ28_00020055 [Nothophytophthora sp. Chile5]	7.1e-123	Endonuclease Reverse transcriptase	NA	RNA-directed DNA polymerase activity	RNA-dependent DNA biosynthetic process	integral component of membrane
Hsym|HyS0002.418	KXJ28680.1 THAP domain-containing protein 2 [Exaiptasia pallida]	3.6e-08	NA	NA	NA	NA	NA
Hsym|HyS0002.419	XP_020613390.1 uncharacterized protein LOC110051673 [Orbicella faveolata]	1.6e-12	Nucleoside diphosphate kinase 6	NA	kinase activity	phosphorylation	NA
Hsym|HyS0002.420	RHZ47791.1 hypothetical protein Glove_567g18 [Diversispora epigaea]	4.3e-32	NA	NA	NA	NA	NA
Hsym|HyS0002.422	XP_001637552.1 predicted protein [Nematostella vectensis]	5.4e-101	SANT domain-containing protein (Fragment)	NA	DNA binding	chromatin remodeling	NA
Hsym|HyS0002.423	KXJ15466.1 hypothetical protein AC249_AIPGENE19858 [Exaiptasia pallida]	4.3e-23	NA	NA	NA	NA	NA
Hsym|HyS0002.425	XP_012554454.1 PREDICTED: uncharacterized protein LOC100197582 isoform X2 [Hydra vulgaris]	1.2e-145	Properdin	NA	semaphorin receptor binding	phagolysosome assembly involved in apoptotic cell clearance	integral component of membrane
Hsym|HyS0002.426	XP_015778265.1 PREDICTED: putative nuclease HARBI1 [Acropora digitifera]	2.3e-18	DDE Tnp4 domain-containing protein	BX571828.1	NA	NA	NA
Hsym|HyS0002.427	XP_028413610.1 eosinophil peroxidase-like [Dendronephthya gigantea]	1.2e-101	Chorion peroxidase	NA	peroxidase activity	response to oxidative stress	extracellular space
Hsym|HyS0002.428	XP_020613742.1 trimethyllysine dioxygenase, mitochondrial-like [Orbicella faveolata]	2.5e-82	Trimethyllysine dioxygenase	NA	trimethyllysine dioxygenase activity	carnitine biosynthetic process	mitochondrion
Hsym|HyS0002.429	XP_012556189.1 PREDICTED: oxidative stress-induced growth inhibitor 2-like [Hydra vulgaris]	1.3e-196	Oxidative stress-induced growth inhibitor 2	OSGIN2	growth factor activity	negative regulation of cell growth	NA
Hsym|HyS0002.431	XP_020624242.1 uncharacterized protein LOC110061727 isoform X2 [Orbicella faveolata]	3.4e-129	Animal haem peroxidase	MLT-7	peroxidase activity	response to oxidative stress	extracellular space
Hsym|HyS0002.432	XP_012555258.1 PREDICTED: uncharacterized protein LOC100198915 isoform X2 [Hydra vulgaris]	4.5e-67	SCP domain-containing protein	NA	NA	NA	extracellular region
Hsym|HyS0002.434	XP_002153855.1 PREDICTED: zinc metalloproteinase nas-4-like [Hydra vulgaris]	8.8e-42	Metalloendopeptidase	NA	metalloendopeptidase activity	proteolysis	membrane
Hsym|HyS0002.435	XP_002164065.3 PREDICTED: uncharacterized protein LOC100206888 [Hydra vulgaris]	7.4e-270	Breast cancer anti-estrogen resistance protein 1	NEDD9	protein tyrosine kinase binding	positive regulation of substrate adhesion-dependent cell spreading	spindle pole
Hsym|HyS0002.436	XP_002167961.1 PREDICTED: charged multivesicular body protein 1a-like [Hydra vulgaris]	2.6e-69	charged multivesicular body protein 1a	CHMP1A	protein domain specific binding	mitotic chromosome condensation	ESCRT III complex
Hsym|HyS0002.437	XP_012557108.1 PREDICTED: uncharacterized protein LOC100206449, partial [Hydra vulgaris]	4.2e-102	A disintegrin and metalloproteinase with thrombospondin motifs 12	NA	fucosyltransferase activity	cellular response to xenobiotic stimulus	extracellular region
Hsym|HyS0002.438	XP_020906526.1 b(0,+)-type amino acid transporter 1-like [Exaiptasia pallida]	5e-64	NA	NA	NA	NA	NA
Hsym|HyS0002.439	RMX53663.1 hypothetical protein pdam_00000448 [Pocillopora damicornis]	2.5e-104	Double oxidase: two peroxidase domains	NA	peroxidase activity	response to oxidative stress	integral component of membrane
Hsym|HyS0002.440	XP_027053401.1 transcriptional enhancer factor TEF-1-like [Pocillopora damicornis]	1.2e-30	Transcriptional enhancer factor TEF-5	NA	DNA-binding transcription factor activity	hippo signaling	nucleus
Hsym|HyS0002.441	XP_012556803.1 PREDICTED: uncharacterized protein LOC105844574 [Hydra vulgaris]	2.9e-81	NA	NA	NA	NA	NA
Hsym|HyS0002.442	XP_002160302.2 PREDICTED: alanine--tRNA ligase, cytoplasmic [Hydra vulgaris]	0	Alanine--tRNA ligase, mitochondrial (inferred by orthology to a human protein)	NA	alanine-tRNA ligase activity	alanyl-tRNA aminoacylation	cytoplasm
Hsym|HyS0002.443	XP_002158371.1 PREDICTED: nucleoporin Nup43-like [Hydra vulgaris]	1.5e-123	Nucleoporin 43	NA	NA	heart development	nuclear pore outer ring
Hsym|HyS0002.444	RMZ96656.1 Transposon Ty3-G Gag-Pol poly [Brachionus plicatilis]	6.8e-13	Transposon Ty3-G Gag-Pol poly	NA	aspartic-type endopeptidase activity	proteolysis	NA
Hsym|HyS0002.445	XP_012560694.1 PREDICTED: probable phospholipid-transporting ATPase IIA [Hydra vulgaris]	0	Phospholipid-transporting ATPase	NA	ATPase-coupled intramembrane lipid transporter activity	phospholipid transport	trans-Golgi network
Hsym|HyS0002.446	XP_002161291.3 PREDICTED: dynactin subunit 1-like [Hydra vulgaris]	0	Dynactin subunit 1	NA	microtubule binding	establishment of mitotic spindle orientation	centrosome
Hsym|HyS0002.447	XP_002156760.1 PREDICTED: 1-acylglycerol-3-phosphate O-acyltransferase ABHD5-like [Hydra vulgaris]	1.2e-88	Abhydrolase domain-containing protein 4	ABHD4	carboxylic ester hydrolase activity	lipid homeostasis	lipid droplet
Hsym|HyS0002.448	XP_002156760.1 PREDICTED: 1-acylglycerol-3-phosphate O-acyltransferase ABHD5-like [Hydra vulgaris]	5.6e-142	Abhydrolase domain-containing protein 4	ABHD4	carboxylic ester hydrolase activity	lipid homeostasis	lipid droplet
Hsym|HyS0002.449	XP_017866732.1 PREDICTED: retinol dehydrogenase 13-like isoform X1 [Drosophila arizonae]	5.4e-63	Zinc finger CCHC domain-containing protein 2	RDH13	NADP-retinol dehydrogenase activity	retinal metabolic process	mitochondrial inner membrane
Hsym|HyS0002.450	XP_004207397.1 PREDICTED: centrosomal protein of 76 kDa-like [Hydra vulgaris]	5.7e-275	Centrosomal protein of 76 kDa	CEP76	actin binding	regulation of centriole replication	centriole
Hsym|HyS0002.451	XP_002164353.2 PREDICTED: peptidyl-prolyl cis-trans isomerase FKBP5-like [Hydra vulgaris]	1.2e-126	FKBP-type peptidyl-prolyl cis-trans isomerase	NA	peptidyl-prolyl cis-trans isomerase activity	protein peptidyl-prolyl isomerization	cytoplasm
Hsym|HyS0002.452	EHB13852.1 Kelch domain-containing protein 8A [Heterocephalus glaber]	2.2e-17	NA	NA	NA	NA	NA
Hsym|HyS0002.453	XP_004207919.2 PREDICTED: pachytene checkpoint protein 2 homolog [Hydra vulgaris]	2.4e-179	Pachytene checkpoint protein 2	TRIP13	ATP binding	female meiosis I	male germ cell nucleus
Hsym|HyS0002.454	XP_022806956.1 GATOR complex protein WDR59-like [Stylophora pistillata]	2.6e-189	WD repeat-containing protein 59	WDR59	NA	positive regulation of TOR signaling	GATOR2 complex
Hsym|HyS0002.455	XP_012564100.1 PREDICTED: protein slowmo homolog 1-like [Hydra vulgaris]	1.2e-80	Slowmo protein variant 2	NA	phosphatidic acid transfer activity	phospholipid transport	mitochondrial intermembrane space
Hsym|HyS0002.456	XP_012556174.1 PREDICTED: importin-4-like isoform X1 [Hydra vulgaris]	0	Importin N-terminal domain-containing protein (Fragment)	IPO4	Ran GTPase binding	protein import into nucleus	cell
Hsym|HyS0002.457	XP_018117938.1 PREDICTED: receptor-transporting protein 2-like [Xenopus laevis]	1.6e-08	NA	NA	NA	NA	NA
Hsym|HyS0002.458	XP_012558701.1 PREDICTED: protein FAN-like [Hydra vulgaris]	0	Factor associated with neutral sphingomyelinase activation	NSMAF	NA	leukocyte chemotaxis involved in immune response	integral component of membrane
Hsym|HyS0002.461	XP_022800640.1 peroxidasin homolog isoform X3 [Stylophora pistillata]	4.2e-67	LOW QUALITY PROTEIN: thyroid peroxidase	NA	peroxidase activity	response to oxidative stress	integral component of membrane
Hsym|HyS0002.463	XP_002153855.1 PREDICTED: zinc metalloproteinase nas-4-like [Hydra vulgaris]	1.2e-31	NA	NA	NA	NA	NA
Hsym|HyS0002.465	XP_012555791.1 PREDICTED: enhancer of mRNA-decapping protein 4-like [Hydra vulgaris]	9.3e-220	Enhancer of mRNA-decapping protein 4	NA	NA	NA	NA
Hsym|HyS0002.466	XP_028409898.1 uncharacterized protein LOC114532567 [Dendronephthya gigantea]	2.3e-34	NA	NA	NA	NA	NA
Hsym|HyS0002.467	XP_001627539.1 predicted protein [Nematostella vectensis]	5.9e-29	NA	NA	NA	NA	NA
Hsym|HyS0002.468	XP_002167023.2 PREDICTED: short-chain dehydrogenase/reductase SDRA-like [Hydra vulgaris]	9e-84	Btb poz domain-containing protein 7	DHRS4	oxidoreductase activity	oxidation-reduction process	integral component of membrane
Hsym|HyS0002.469	XP_012565536.1 PREDICTED: UPF0598 protein CG30010-like [Hydra vulgaris]	5.5e-62	Nicotinate phosphoribosyltransferase	NA	NA	NA	integral component of membrane
Hsym|HyS0002.470	XP_002168444.2 PREDICTED: aspartate aminotransferase, mitochondrial-like [Hydra vulgaris]	1.3e-182	Aspartate aminotransferase	GOT2	L-aspartate:2-oxoglutarate aminotransferase activity	cellular amino acid metabolic process	mitochondrion
Hsym|HyS0002.471	XP_025115745.1 uncharacterized protein F13E9.13, mitochondrial-like [Pomacea canaliculata]	1.7e-79	Novel protein similar to proteins found in invertebrates only thus far	NA	catalytic activity	NA	integral component of membrane
Hsym|HyS0002.473	PIN93179.1 hypothetical protein AB205_0035040 [Rana catesbeiana]	2.1e-12	Triple helix repeat-containing collagen	NA	cellulose 1,4-beta-cellobiosidase activity	cell adhesion	integral component of membrane
Hsym|HyS0002.475	XP_014834493.1 PREDICTED: uncharacterized protein LOC106912169 isoform X1 [Poecilia mexicana]	2.2e-60	NA	NA	NA	NA	NA
Hsym|HyS0002.478	EFX64163.1 hypothetical protein DAPPUDRAFT_229854 [Daphnia pulex]	8e-27	NA	NA	NA	NA	NA
Hsym|HyS0002.479	EFX82712.1 hypothetical protein DAPPUDRAFT_223767 [Daphnia pulex]	8e-27	NA	NA	NA	NA	NA
Hsym|HyS0002.480	XP_021351234.1 serine/threonine-protein kinase EDR1-like [Mizuhopecten yessoensis]	2.6e-37	NA	NA	NA	NA	NA
Hsym|HyS0002.481	XP_012561579.1 PREDICTED: uncharacterized protein KIAA0513-like [Hydra vulgaris]	6.5e-85	SBF2 domain-containing protein (Fragment)	NA	NA	NA	cytoplasm
Hsym|HyS0002.482	XP_012558185.1 PREDICTED: ankyrin repeat-containing protein C6C3.08-like [Hydra vulgaris]	2.2e-21	Dynein heavy chain 7, axonemal	NA	microtubule motor activity	microtubule-based movement	dynein complex
Hsym|HyS0002.484	XP_002158373.2 PREDICTED: mitotic spindle-associated MMXD complex subunit MIP18-like [Hydra vulgaris]	4.1e-56	mitotic spindle-associated MMXD complex subunit MIP18	NA	protein binding	protein maturation by [4Fe-4S] cluster transfer	CIA complex
Hsym|HyS0002.485	QBC65509.1 glyceraldehyde 3-phosphate dehydrogenase, partial [Dynamena pumila]	5.2e-163	Glyceraldehyde-3-phosphate dehydrogenase	NA	glyceraldehyde-3-phosphate dehydrogenase (NAD+) (phosphorylating) activity	glucose metabolic process	cytosol
Hsym|HyS0002.487	XP_002156689.3 PREDICTED: cirhin-like [Hydra vulgaris]	5.1e-183	U3 small nucleolar RNA-associated protein 4 homolog isoform X1	NA	NA	NA	NA
Hsym|HyS0002.488	XP_023231303.1 N-acetylglucosamine-1-phosphodiester alpha-N-acetylglucosaminidase-like isoform X1 [Centruroides sculpturatus]	2e-63	N-acetylglucosamine-1-phosphodiester alpha-N-acetylglucosaminidase	NAGPA	N-acetylglucosamine-1-phosphodiester alpha-N-acetylglucosaminidase activity	secretion of lysosomal enzymes	Golgi cisterna membrane
Hsym|HyS0002.489	XP_012553568.1 PREDICTED: N-acetylglucosamine-1-phosphodiester alpha-N-acetylglucosaminidase-like [Hydra vulgaris]	3.1e-114	N-acetylglucosamine-1-phosphodiester alpha-N-acetylglucosaminidase	NAGPA	NA	secretion of lysosomal enzymes	integral component of membrane
Hsym|HyS0002.490	XP_002160740.1 PREDICTED: coiled-coil domain-containing protein 103-like [Hydra vulgaris]	2.2e-34	Coiled-coil domain-containing protein 103	CCDC103	NA	axonemal dynein complex assembly	outer dynein arm
Hsym|HyS0002.491	XP_014351397.1 PREDICTED: uncharacterized protein LOC106705860 [Latimeria chalumnae]	5.5e-36	Adipokinetic receptor	NA	adenylate cyclase activity	negative regulation of TOR signaling	TSC1-TSC2 complex
Hsym|HyS0002.492	APW77286.1 SoxF2 [Hydractinia echinata]	3.5e-197	NA	NA	NA	NA	NA
Hsym|HyS0002.493	XP_012560108.1 PREDICTED: 60S ribosomal protein L13-like [Hydra vulgaris]	6.7e-89	Ribosomal protein L13	NA	structural constituent of ribosome	translation	ribosome
Hsym|HyS0002.494	XP_002166232.1 PREDICTED: RNA-binding protein 28-like isoform X1 [Hydra vulgaris]	3e-167	RNA recognition motif	NA	RNA binding	NA	ribonucleoprotein complex
Hsym|HyS0002.495	XP_011686120.1 PREDICTED: uncharacterized protein LOC105448935 isoform X1 [Wasmannia auropunctata]	3.4e-39	NA	NA	NA	NA	NA
Hsym|HyS0002.499	XP_012557041.1 PREDICTED: gamma-glutamyl hydrolase-like [Hydra vulgaris]	5.8e-63	NA	NA	NA	NA	NA
Hsym|HyS0002.500	XP_028392820.1 nose resistant to fluoxetine protein 6-like [Dendronephthya gigantea]	2.3e-05	NA	NA	NA	NA	NA
Hsym|HyS0002.501	XP_002157103.2 PREDICTED: nose resistant to fluoxetine protein 6-like [Hydra vulgaris]	1.9e-144	Nose resistant to fluoxetine protein 6	NA	transferase activity, transferring acyl groups other than amino-acyl groups	NA	integral component of membrane
Hsym|HyS0002.502	PFX15925.1 Neurofilament medium polypeptide [Stylophora pistillata]	1.2e-10	NA	NA	NA	NA	NA
Hsym|HyS0002.503	PFX15925.1 Neurofilament medium polypeptide [Stylophora pistillata]	6.5e-11	NA	NA	NA	NA	NA
Hsym|HyS0002.504	XP_022782367.1 uncharacterized protein LOC111323308 [Stylophora pistillata]	1.7e-42	Transmembrane matrix receptor MUP-4	NA	calcium ion binding	copper ion transport	collagen trimer
Hsym|HyS0002.505	XP_012555035.1 PREDICTED: probable malonyl-CoA-acyl carrier protein transacylase, mitochondrial [Hydra vulgaris]	1.9e-54	Malonyl CoA-acyl carrier protein transacylase	NA	[acyl-carrier-protein] S-malonyltransferase activity	fatty acid biosynthetic process	cytosol
Hsym|HyS0002.506	XP_012561273.1 PREDICTED: uncharacterized protein LOC105846770 [Hydra vulgaris]	3.1e-24	NA	NA	NA	NA	NA
Hsym|HyS0002.508	XP_012408195.1 membrane-spanning 4-domains subfamily A member 8 [Sarcophilus harrisii]	0.00099	NA	NA	NA	NA	NA
Hsym|HyS0002.509	XP_002158374.2 PREDICTED: uncharacterized protein LOC100201569 isoform X2 [Hydra vulgaris]	1.9e-14	NA	NA	NA	NA	NA
Hsym|HyS0002.510	XP_002158321.2 PREDICTED: selenocysteine lyase-like isoform X1 [Hydra vulgaris]	1.3e-123	Cysteine desulfurase, mitochondrial	SCLY	lyase activity	selenocysteine catabolic process	cytosol
Hsym|HyS0002.511	XP_012562732.1 PREDICTED: kelch-like protein 12 isoform X1 [Hydra vulgaris]	4.3e-192	BACK domain-containing protein (Fragment)	NA	NA	NA	NA
Hsym|HyS0002.512	XP_002157039.1 PREDICTED: exosome complex component RRP42-like [Hydra vulgaris]	9e-113	Exosome component 7	EXOSC7	exonuclease activity	U1 snRNA 3'-end processing	exosome (RNase complex)
Hsym|HyS0002.513	XP_002598738.1 hypothetical protein BRAFLDRAFT_95854 [Branchiostoma floridae]	3.5e-57	Rhamnose-binding lectin	NA	carbohydrate binding	G protein-coupled receptor signaling pathway	cortical granule
Hsym|HyS0002.514	XP_012558142.1 PREDICTED: uncharacterized protein LOC105845210 [Hydra vulgaris]	1.6e-47	NA	NA	NA	NA	NA
Hsym|HyS0002.515	XP_015253597.1 PREDICTED: cytidine monophosphate-N-acetylneuraminic acid hydroxylase-like [Cyprinodon variegatus]	1.9e-15	NA	NA	NA	NA	NA
Hsym|HyS0002.516	XP_002157973.3 PREDICTED: serine/threonine-protein kinase Nek7-like [Hydra vulgaris]	3.7e-117	SERINE THERONINE PROTEIN KINASE	NEK6	protein serine/threonine kinase activity	protein phosphorylation	centrosome
Hsym|HyS0002.517	XP_002157973.3 PREDICTED: serine/threonine-protein kinase Nek7-like [Hydra vulgaris]	4.9e-130	SERINE THERONINE PROTEIN KINASE	NEK6	protein serine/threonine kinase activity	protein phosphorylation	centrosome
Hsym|HyS0002.518	XP_002157973.3 PREDICTED: serine/threonine-protein kinase Nek7-like [Hydra vulgaris]	1.4e-153	Serine threonine-protein kinase nek7	NEK7	protein serine/threonine kinase activity	protein phosphorylation	nucleoplasm
Hsym|HyS0002.519	XP_020469255.1 dnaJ homolog subfamily A member 2-like [Monopterus albus]	1e-131	V-type proton ATPase subunit G 1	DNAJA2	heat shock protein binding	response to heat	cytosol
Hsym|HyS0002.521	XP_012555166.1 PREDICTED: E3 ubiquitin-protein ligase RNF31-like [Hydra vulgaris]	1.1e-138	microtubule-associated protein futsch isoform X2	NA	ubiquitin-protein transferase activity	protein ubiquitination	LUBAC complex
Hsym|HyS0002.522	XP_012560109.1 PREDICTED: uncharacterized protein LOC105846183 [Hydra vulgaris]	2.5e-56	Glycoprotein endo-alpha-1,2-mannosidase	ZNRF2	ligase activity	RNA phosphodiester bond hydrolysis	integral component of membrane
Hsym|HyS0002.523	XP_002156814.3 PREDICTED: solute carrier family 35 member C2-like [Hydra vulgaris]	3.5e-104	Serine/threonine-protein phosphatase 6 regulatory subunit 2	SLC35C2	antiporter activity	protein O-linked fucosylation	endoplasmic reticulum-Golgi intermediate compartment
Hsym|HyS0002.525	XP_012561602.1 PREDICTED: uncharacterized protein LOC101237375 [Hydra vulgaris]	7.7e-34	NA	NA	NA	NA	NA
Hsym|HyS0002.526	XP_012564855.1 PREDICTED: uncharacterized protein LOC105849096 [Hydra vulgaris]	3.7e-39	NA	NA	NA	NA	NA
Hsym|HyS0002.527	XP_002160183.2 PREDICTED: uncharacterized protein LOC100198021 [Hydra vulgaris]	1.6e-62	Capsular biosynthesis protein	NA	NA	NA	NA
Hsym|HyS0002.529	XP_022799380.1 programmed cell death protein 6-like [Stylophora pistillata]	9.8e-60	Pyridine nucleotide-disulfide oxidoreductase domain-containing protein 1	NA	calcium ion binding	oxidation-reduction process	integral component of membrane
Hsym|HyS0002.531	XP_002161777.1 PREDICTED: uncharacterized protein LOC100204812 [Hydra vulgaris]	3.6e-49	NA	NA	NA	NA	NA
Hsym|HyS0002.532	XP_002167130.3 PREDICTED: group XV phospholipase A2-like [Hydra vulgaris]	3.9e-141	Lecithin:cholesterol acyltransferase	PLA2G15	O-acyltransferase activity	lipid metabolic process	extracellular space
Hsym|HyS0002.533	XP_014671423.1 PREDICTED: LOW QUALITY PROTEIN: cyclin-D1-binding protein 1 homolog [Priapulus caudatus]	7.5e-36	NA	NA	NA	NA	NA
Hsym|HyS0002.534	XP_012562855.1 PREDICTED: exocyst complex component 2-like [Hydra vulgaris]	8.4e-222	Exocyst complex component 2	NA	NA	Golgi to plasma membrane transport	exocyst
Hsym|HyS0002.536	XP_002155493.2 PREDICTED: F-box/LRR-repeat protein 7-like [Hydra vulgaris]	1.5e-16	F-box and leucine rich repeat protein 12	FBXL12	NA	NA	NA
Hsym|HyS0002.537	XP_002156246.2 PREDICTED: methyltransferase-like protein 17, mitochondrial isoform X1 [Hydra vulgaris]	3.3e-161	Methyltransferase like 17	METTL17	methyltransferase activity	methylation	nucleoplasm
Hsym|HyS0002.538	XP_012559021.1 PREDICTED: uncharacterized protein LOC101237693 [Hydra vulgaris]	1.2e-62	NA	NA	NA	NA	NA
Hsym|HyS0002.540	XP_002166787.2 PREDICTED: zinc finger CCCH domain-containing protein 18-like [Hydra vulgaris]	2.7e-92	Zinc finger CCCH domain-containing protein 18	NA	metal ion binding	NA	NA
Hsym|HyS0002.541	XP_004206957.1 PREDICTED: transmembrane emp24 domain-containing protein 5-like [Hydra vulgaris]	1.1e-63	NA	NA	NA	NA	NA
Hsym|HyS0002.542	XP_013175409.1 PREDICTED: S-phase kinase-associated protein 1 [Papilio xuthus]	5.2e-68	SCF ubiquitin ligase complex	SKP1	kinase activity	ubiquitin-dependent protein catabolic process	nucleus
Hsym|HyS0002.543	XP_004209545.1 PREDICTED: cytochrome c1, heme protein, mitochondrial-like [Hydra vulgaris]	1.6e-115	Cytochrome c domain-containing protein (Fragment)	CYC1	heme binding	electron transport chain	mitochondrial respiratory chain complex III
Hsym|HyS0002.545	PFX22769.1 hypothetical protein AWC38_SpisGene12708 [Stylophora pistillata]	3.5e-12	HIRAN domain-containing protein	NA	zinc ion binding	NA	NA
Hsym|HyS0002.546	XP_002592208.1 hypothetical protein BRAFLDRAFT_84636 [Branchiostoma floridae]	2.7e-69	DDE-1 domain-containing protein (Fragment)	NA	nucleic acid binding	NA	NA
Hsym|HyS0002.547	XP_012557077.1 PREDICTED: UDP-GalNAc:beta-1,3-N-acetylgalactosaminyltransferase 2-like [Hydra vulgaris]	1.9e-94	Hexosyltransferase	B3GALNT2	galactosyltransferase activity	protein glycosylation	Golgi membrane
Hsym|HyS0002.548	XP_004208652.2 PREDICTED: protein phosphatase 1 regulatory inhibitor subunit 16B-like [Hydra vulgaris]	1.2e-89	Ankyrin repeat domain containing protein 24	PPP1R16B	phosphatase regulator activity	regulation of phosphoprotein phosphatase activity	cytosol
Hsym|HyS0002.549	XP_002167064.3 PREDICTED: uncharacterized protein LOC100215046 [Hydra vulgaris]	2.1e-06	NA	NA	NA	NA	NA
Hsym|HyS0002.550	XP_012558610.1 PREDICTED: radial spoke head protein 4 homolog A-like [Hydra vulgaris]	6.4e-112	Radial spoke head protein 4 like protein A	RSPH4A	NA	cilium movement involved in cell motility	radial spoke
Hsym|HyS0002.553	XP_004208786.2 PREDICTED: biogenesis of lysosome-related organelles complex 1 subunit 4-like [Hydra vulgaris]	1.5e-39	Protein cappuccino homolog	NA	NA	NA	NA
Hsym|HyS0002.554	PRD28580.1 Cebpg [Nephila clavipes]	2.5e-07	Neuroguidin	NA	DNA-binding transcription factor activity	regulation of transcription, DNA-templated	NA
Hsym|HyS0002.555	XP_028409966.1 protein CBFA2T3-like [Dendronephthya gigantea]	9e-76	Core-binding factor, runt domain, alpha subunit 2; translocated to, 2	RUNX1T1	transcription corepressor activity	negative regulation of transcription, DNA-templated	nucleus
Hsym|HyS0002.556	KXJ20573.1 hypothetical protein AC249_AIPGENE9410 [Exaiptasia pallida]	8.4e-08	NA	NA	NA	NA	NA
Hsym|HyS0002.557	XP_022186308.1 uncharacterized protein LOC111045254 isoform X1 [Nilaparvata lugens]	7.6e-07	NA	NA	NA	NA	NA
Hsym|HyS0002.558	KXJ20573.1 hypothetical protein AC249_AIPGENE9410 [Exaiptasia pallida]	8.4e-08	NA	NA	NA	NA	NA
Hsym|HyS0002.559	XP_022186308.1 uncharacterized protein LOC111045254 isoform X1 [Nilaparvata lugens]	6.9e-07	NA	NA	NA	NA	NA
Hsym|HyS0002.560	XP_012554818.1 PREDICTED: uncharacterized protein LOC101241003 [Hydra vulgaris]	1.9e-100	Cell surface protein IsdA	NA	serine-type endopeptidase activity	cellular response to xenobiotic stimulus	extracellular region
Hsym|HyS0002.561	XP_002166651.2 PREDICTED: uncharacterized protein LOC100204688 [Hydra vulgaris]	3.8e-21	NA	NA	NA	NA	NA
Hsym|HyS0002.562	RUS69125.1 hypothetical protein EGW08_023114 [Elysia chlorotica]	4.6e-27	Transcription initiation factor IIA small subunit	NA	translation initiation factor activity	transcription initiation from RNA polymerase II promoter	transcription factor TFIIA complex
Hsym|HyS0002.563	PAA74152.1 hypothetical protein BOX15_Mlig007668g1 [Macrostomum lignano]	5.9e-12	NA	NA	NA	NA	NA
Hsym|HyS0002.564	XP_011673963.1 PREDICTED: uncharacterized protein LOC105442958 [Strongylocentrotus purpuratus]	1.6e-148	NA	NA	NA	NA	NA
Hsym|HyS0002.565	XP_012565668.1 PREDICTED: uncharacterized protein LOC101238011 [Hydra vulgaris]	1.5e-175	Fibrillin-2	NA	wide pore channel activity	transmembrane transport	integral component of membrane
Hsym|HyS0002.566	XP_012556191.1 PREDICTED: lisH domain and HEAT repeat-containing protein KIAA1468-like [Hydra vulgaris]	6e-264	RAB11 binding and LisH domain, coiled-coil and HEAT repeat containing	NA	metalloendopeptidase activity	intracellular cholesterol transport	trans-Golgi network
Hsym|HyS0002.567	XP_002160134.1 PREDICTED: NSFL1 cofactor p47-like [Hydra vulgaris]	2.9e-98	UBX domain-containing protein 1	NA	ubiquitin binding	nuclear envelope reassembly	cytosol
Hsym|HyS0002.568	WP_058516469.1 ankyrin repeat domain-containing protein [Legionella parisiensis]	1.5e-12	Ankyrin repeat domain-containing protein 54	NA	DNA binding	regulation of apoptotic process	integral component of membrane
Hsym|HyS0002.569	WP_013324359.1 alcohol dehydrogenase [Cyanothece sp. PCC 7822]	5.6e-98	Zinc-containing alcohol dehydrogenase	NA	L-threonine 3-dehydrogenase activity	oxidation-reduction process	NA
Hsym|HyS0002.570	XP_002158093.1 PREDICTED: OTU domain-containing protein 6B-like isoform X1 [Hydra vulgaris]	2.7e-66	OTU domain-containing protein 2	OTUD6B	thiol-dependent ubiquitin-specific protease activity	protein deubiquitination	eukaryotic translation initiation factor 4F complex
Hsym|HyS0002.571	XP_012555860.1 PREDICTED: tyrosine aminotransferase-like [Hydra vulgaris]	2.6e-162	Tyrosine aminotransferase	TAT	L-tyrosine:2-oxoglutarate aminotransferase activity	aromatic amino acid family catabolic process	mitochondrion
Hsym|HyS0002.573	XP_026048799.1 uncharacterized protein K02A2.6-like [Astatotilapia calliptera]	5.8e-54	Polyprotein of retroviral origin	K02A2.6	nucleic acid binding	DNA integration	extracellular space
Hsym|HyS0002.575	XP_011444523.1 PREDICTED: heat shock 70 kDa protein 12A [Crassostrea gigas]	1.8e-91	Heat shock 70 kDa protein 12B	NA	NA	NA	NA
Hsym|HyS0002.576	XP_022107154.1 uncharacterized protein LOC110988171 [Acanthaster planci]	2e-14	NA	NA	NA	NA	NA
Hsym|HyS0002.577	XP_015273720.1 PREDICTED: ethanolamine kinase 1 [Gekko japonicus]	9.2e-63	Low quality protein: ethanolamine	ETNK1	ethanolamine kinase activity	phosphatidylethanolamine biosynthetic process	nucleoplasm
Hsym|HyS0002.578	XP_012560721.1 PREDICTED: trafficking protein particle complex subunit 8-like [Hydra vulgaris]	8.5e-295	C-Jun-amino-terminal kinase-interacting protein 2	TRAPPC8	transposase activity	protein localization to phagophore assembly site	TRAPP complex
Hsym|HyS0002.579	XP_015762083.1 PREDICTED: uncharacterized protein LOC107341183 [Acropora digitifera]	2.1e-30	NA	NA	NA	NA	NA
Hsym|HyS0002.580	XP_028418164.1 uncharacterized protein LOC114543334 [Dendronephthya gigantea]	1.5e-82	HECT domain-containing protein	NA	ubiquitin-protein transferase activity	protein ubiquitination	NA
Hsym|HyS0002.581	XP_002161903.2 PREDICTED: transcription initiation factor TFIID subunit 4-like [Hydra vulgaris]	1.6e-149	Transcription initiation factor TFIID subunit 4	NA	protein heterodimerization activity	DNA-templated transcription, initiation	transcription factor TFIID complex
Hsym|HyS0002.582	XP_002155246.3 PREDICTED: nucleolar protein 9-like [Hydra vulgaris]	4e-165	Pumilio domain-containing protein C14orf21 (Fragment)	NA	RNA binding	NA	NA
Hsym|HyS0002.583	XP_012560683.1 PREDICTED: ribosome biogenesis protein bop1-B-like [Hydra vulgaris]	4.5e-292	Ribosome biogenesis protein bop1-B	BOP1	ribonucleoprotein complex binding	maturation of LSU-rRNA from tricistronic rRNA transcript (SSU-rRNA, 5.8S rRNA, LSU-rRNA)	preribosome, large subunit precursor
Hsym|HyS0003.1	PFX27294.1 Tyrosine-protein kinase receptor Tie-2 [Stylophora pistillata]	1.1e-16	NA	NA	NA	NA	NA
Hsym|HyS0003.2	XP_015774334.1 PREDICTED: piggyBac transposable element-derived protein 4-like [Acropora digitifera]	8e-10	NA	NA	NA	NA	NA
Hsym|HyS0003.3	XP_002154308.1 PREDICTED: sodium/calcium exchanger 1-like [Hydra vulgaris]	2.3e-294	Sodium-calcium exchanger	NA	calcium:sodium antiporter activity	sodium ion transmembrane transport	integral component of membrane
Hsym|HyS0003.4	XP_004205515.1 PREDICTED: metabotropic glutamate receptor 1-like [Hydra vulgaris]	8.6e-06	NA	NA	NA	NA	NA
Hsym|HyS0003.5	XP_003803470.1 low affinity immunoglobulin epsilon Fc receptor [Otolemur garnettii]	2e-18	C-type lectin-2	NA	carbohydrate binding	NA	integral component of membrane
Hsym|HyS0003.6	XP_012561832.1 PREDICTED: uncharacterized protein LOC101240293 [Hydra vulgaris]	5e-181	NA	NA	NA	NA	NA
Hsym|HyS0003.8	XP_012561832.1 PREDICTED: uncharacterized protein LOC101240293 [Hydra vulgaris]	1e-176	NA	NA	NA	NA	NA
Hsym|HyS0003.10	XP_001633573.1 predicted protein [Nematostella vectensis]	3.2e-15	NA	NA	NA	NA	NA
Hsym|HyS0003.11	XP_020618727.1 translin-associated protein X-like [Orbicella faveolata]	9.6e-48	Translin-associated protein X	TSNAX	sequence-specific DNA binding	RNA phosphodiester bond hydrolysis, endonucleolytic	nucleus
Hsym|HyS0003.15	RDD47453.1 Neuroglobin [Trichoplax sp. H2]	0.00039	NA	NA	NA	NA	NA
Hsym|HyS0003.16	XP_020896787.1 TAF6-like RNA polymerase II p300/CBP-associated factor-associated factor 65 kDa subunit 6L [Exaiptasia pallida]	3.1e-56	TAF6-like RNA polymerase II p300/CBP-associated factor-associated factor 65 kDa subunit 6L (Fragment)	NA	protein heterodimerization activity	transcription initiation from RNA polymerase II promoter	SLIK (SAGA-like) complex
Hsym|HyS0003.19	XP_012559409.1 PREDICTED: E3 ubiquitin-protein ligase HECTD1-like isoform X1 [Hydra vulgaris]	0	HECT-domain (Ubiquitin-transferase)	NA	ubiquitin-protein transferase activity	protein ubiquitination	nucleus
Hsym|HyS0003.20	XP_012559409.1 PREDICTED: E3 ubiquitin-protein ligase HECTD1-like isoform X1 [Hydra vulgaris]	1.7e-14	NA	NA	NA	NA	NA
Hsym|HyS0003.24	XP_012560545.1 PREDICTED: transcriptional adapter 2-beta-like [Hydra vulgaris]	2.1e-11	Transcriptional adapter 2-beta (Fragment)	NA	transcription coactivator activity	regulation of histone acetylation	nucleus
Hsym|HyS0003.25	XP_012560545.1 PREDICTED: transcriptional adapter 2-beta-like [Hydra vulgaris]	8e-120	Transcriptional adapter	NA	transcription coactivator activity	regulation of histone acetylation	nucleus
Hsym|HyS0003.26	XP_002158440.3 PREDICTED: rRNA-processing protein FCF1 homolog isoform X1 [Hydra vulgaris]	5.1e-86	U3 small nucleolar RNA-associated protein 24	NA	NA	endonucleolytic cleavage in 5'-ETS of tricistronic rRNA transcript (SSU-rRNA, 5.8S rRNA, LSU-rRNA)	small-subunit processome
Hsym|HyS0003.27	XP_002156851.2 PREDICTED: probable NADH dehydrogenase [Hydra vulgaris]	1.9e-181	NADH-ubiquinone oxidoreductase	NA	oxidoreductase activity	oxidation-reduction process	NA
Hsym|HyS0003.28	XP_002162800.2 PREDICTED: uncharacterized protein LOC100201987 [Hydra vulgaris]	2.4e-12	NA	NA	NA	NA	NA
Hsym|HyS0003.30	XP_027058152.1 probable 2-oxoglutarate dehydrogenase E1 component DHKTD1, mitochondrial [Pocillopora damicornis]	9.4e-284	2-oxoglutarate dehydrogenase, mitochondrial	DHTKD1	oxoglutarate dehydrogenase (succinyl-transferring) activity	tricarboxylic acid cycle	oxoglutarate dehydrogenase complex
Hsym|HyS0003.32	XP_002157660.2 PREDICTED: uncharacterized protein LOC100209795 isoform X1 [Hydra vulgaris]	1.3e-22	NA	NA	NA	NA	NA
Hsym|HyS0003.33	XP_012556927.1 PREDICTED: N-acylneuraminate-9-phosphatase-like [Hydra vulgaris]	1.3e-41	NA	NA	NA	NA	NA
Hsym|HyS0003.34	XP_019614791.1 PREDICTED: degenerin unc-8-like [Branchiostoma belcheri]	1.2e-38	NA	NA	NA	NA	NA
Hsym|HyS0003.35	OPJ83263.1 neuroglobin [Patagioenas fasciata monilis]	4.5e-05	NA	NA	NA	NA	NA
Hsym|HyS0003.36	XP_002165520.2 PREDICTED: beclin 1-associated autophagy-related key regulator-like [Hydra vulgaris]	7.2e-118	Beclin 1-associated autophagy-related key regulator	NA	NA	NA	NA
Hsym|HyS0003.37	XP_019647212.1 PREDICTED: acid-sensing ion channel 5-like [Branchiostoma belcheri]	1.1e-38	NA	NA	NA	NA	NA
Hsym|HyS0003.38	XP_012560101.1 PREDICTED: nucleolin 2-like isoform X1 [Hydra vulgaris]	4.4e-65	DNA-directed RNA polymerase	NA	RNA binding	rRNA processing	nucleolus
Hsym|HyS0003.39	XP_022329740.1 BRISC and BRCA1-A complex member 2-like [Crassostrea virginica]	3.1e-44	NA	NA	NA	NA	NA
Hsym|HyS0003.42	XP_002157256.2 PREDICTED: RNA-binding protein 34-like isoform X1 [Hydra vulgaris]	5.6e-57	RNA-binding protein 34	NA	RNA binding	regulation of transcription, DNA-templated	nucleus
Hsym|HyS0003.43	XP_012560657.1 PREDICTED: uncharacterized protein LOC105846445 [Hydra vulgaris]	1.1e-50	NA	NA	NA	NA	NA
Hsym|HyS0003.45	XP_020628114.1 selenoprotein K-like [Orbicella faveolata]	2.1e-18	Selenoprotein Klike [Xiphosphorus maculatus]	NA	identical protein binding	respiratory burst after phagocytosis	integral component of membrane
Hsym|HyS0003.46	XP_002157097.1 PREDICTED: procollagen-lysine,2-oxoglutarate 5-dioxygenase 1-like [Hydra vulgaris]	3e-301	Multifunctional procollagen lysine hydroxylase and glycosyltransferase LH3	PLOD3	procollagen-lysine 5-dioxygenase activity	motor neuron axon guidance	endoplasmic reticulum
Hsym|HyS0003.47	XP_002157097.1 PREDICTED: procollagen-lysine,2-oxoglutarate 5-dioxygenase 1-like [Hydra vulgaris]	2.3e-298	Multifunctional procollagen lysine hydroxylase and glycosyltransferase LH3	NA	procollagen-lysine 5-dioxygenase activity	hydroxylysine biosynthetic process	catalytic complex
Hsym|HyS0003.49	XP_028393912.1 ubiA prenyltransferase domain-containing protein 1-like [Dendronephthya gigantea]	2.8e-65	UbiA prenyltransferase domain-containing protein 1	UBIAD1	prenyltransferase activity	vitamin K biosynthetic process	integral component of Golgi membrane
Hsym|HyS0003.50	XP_012564273.1 PREDICTED: lactosylceramide 1,3-N-acetyl-beta-D-glucosaminyltransferase-like [Hydra vulgaris]	1.4e-51	NA	NA	NA	NA	NA
Hsym|HyS0003.51	XP_012564273.1 PREDICTED: lactosylceramide 1,3-N-acetyl-beta-D-glucosaminyltransferase-like [Hydra vulgaris]	2.4e-37	NA	NA	NA	NA	NA
Hsym|HyS0003.53	KXJ16773.1 ATP-dependent DNA helicase PIF6 [Exaiptasia pallida]	1.2e-07	NA	NA	NA	NA	NA
Hsym|HyS0003.54	XP_012564311.1 PREDICTED: uncharacterized protein LOC105848668, partial [Hydra vulgaris]	1.9e-36	NA	NA	NA	NA	NA
Hsym|HyS0003.55	XP_002161373.1 PREDICTED: synaptojanin-2-binding protein-like [Hydra vulgaris]	4.3e-27	PDZ domain-containing protein	NA	NA	NA	NA
Hsym|HyS0003.56	PFX14994.1 hypothetical protein AWC38_SpisGene20812 [Stylophora pistillata]	1.6e-08	NA	NA	NA	NA	NA
Hsym|HyS0003.57	XP_012557428.1 PREDICTED: LOW QUALITY PROTEIN: uncharacterized protein LOC105844884 [Hydra vulgaris]	6.1e-08	NA	NA	NA	NA	NA
Hsym|HyS0003.58	XP_012557426.1 PREDICTED: thyroid adenoma-associated protein homolog [Hydra vulgaris]	4.1e-174	NA	NA	NA	NA	NA
Hsym|HyS0003.61	XP_014676761.1 PREDICTED: uncharacterized protein LOC106816650 [Priapulus caudatus]	5.6e-05	NA	NA	NA	NA	NA
Hsym|HyS0003.62	XP_004207634.1 PREDICTED: uncharacterized protein LOC101236165 [Hydra vulgaris]	5.5e-124	NA	NA	NA	NA	NA
Hsym|HyS0003.63	XP_012558621.1 PREDICTED: ubiquinone biosynthesis monooxygenase COQ6, mitochondrial-like [Hydra vulgaris]	1.7e-119	Ubiquinone biosynthesis monooxygenase COQ6, mitochondrial	COQ6	oxidoreductase activity, acting on paired donors, with incorporation or reduction of molecular oxygen, reduced flavin or flavoprotein as one donor, and incorporation of one atom of oxygen	ubiquinone biosynthetic process	extrinsic component of mitochondrial inner membrane
Hsym|HyS0003.64	AAO20337.1 ribosomal protein S16, partial [Hydra vulgaris]	7.6e-63	Ribosomal protein S16	RPS16	structural constituent of ribosome	translation	ribosome
Hsym|HyS0003.65	GBG76619.1 hypothetical protein CBR_g22835 [Chara braunii]	3.9e-15	Calmodulin mRNA	NA	calcium ion binding	calcium-mediated signaling	central plaque of spindle pole body
Hsym|HyS0003.67	XP_012564585.1 PREDICTED: putative uncharacterized protein DDB_G0282133 [Hydra vulgaris]	7.2e-46	NA	NA	NA	NA	NA
Hsym|HyS0003.68	XP_012557426.1 PREDICTED: thyroid adenoma-associated protein homolog [Hydra vulgaris]	4.9e-143	NA	NA	NA	NA	NA
Hsym|HyS0003.71	XP_004207634.1 PREDICTED: uncharacterized protein LOC101236165 [Hydra vulgaris]	5.3e-123	NA	NA	NA	NA	NA
Hsym|HyS0003.72	XP_014676761.1 PREDICTED: uncharacterized protein LOC106816650 [Priapulus caudatus]	3.7e-11	NA	NA	NA	NA	NA
Hsym|HyS0003.73	XP_012558621.1 PREDICTED: ubiquinone biosynthesis monooxygenase COQ6, mitochondrial-like [Hydra vulgaris]	8.5e-119	Ubiquinone biosynthesis monooxygenase COQ6, mitochondrial	COQ6	oxidoreductase activity, acting on paired donors, with incorporation or reduction of molecular oxygen, reduced flavin or flavoprotein as one donor, and incorporation of one atom of oxygen	ubiquinone biosynthetic process	extrinsic component of mitochondrial inner membrane
Hsym|HyS0003.74	AAO20337.1 ribosomal protein S16, partial [Hydra vulgaris]	8.9e-63	Ribosomal protein S16	RPS16	structural constituent of ribosome	translation	ribosome
Hsym|HyS0003.75	GBG76619.1 hypothetical protein CBR_g22835 [Chara braunii]	3.9e-15	Calmodulin mRNA	NA	calcium ion binding	calcium-mediated signaling	central plaque of spindle pole body
Hsym|HyS0003.77	XP_012564585.1 PREDICTED: putative uncharacterized protein DDB_G0282133 [Hydra vulgaris]	3.7e-57	NA	NA	NA	NA	NA
Hsym|HyS0003.78	XP_015780738.1 PREDICTED: uncharacterized protein LOC107358661 [Acropora digitifera]	1.2e-61	Regulatory factor X domain-containing protein 2	RFX7	DNA-binding transcription factor activity	regulation of transcription, DNA-templated	nucleus
Hsym|HyS0003.79	XP_012556141.1 PREDICTED: protein FAM214A-like [Hydra vulgaris]	3.3e-138	DUF4210 domain-containing protein (Fragment)	NA	NA	NA	NA
Hsym|HyS0003.80	XP_002155374.2 PREDICTED: tetratricopeptide repeat protein 8-like [Hydra vulgaris]	1.2e-136	tetratricopeptide repeat protein 8	TTC8	NA	non-motile cilium assembly	BBSome
Hsym|HyS0003.81	XP_002162840.3 PREDICTED: uncharacterized protein LOC100197871 [Hydra vulgaris]	5.8e-23	NA	NA	NA	NA	NA
Hsym|HyS0003.82	XP_012562043.1 PREDICTED: UTP--glucose-1-phosphate uridylyltransferase-like [Hydra vulgaris]	8.2e-213	UTP--glucose-1-phosphate uridylyltransferase	NA	UTP:glucose-1-phosphate uridylyltransferase activity	UDP-glucose metabolic process	striated muscle dense body
Hsym|HyS0003.83	XP_012562751.1 PREDICTED: uncharacterized protein LOC105847614 isoform X1 [Hydra vulgaris]	4.1e-54	NA	NA	NA	NA	NA
Hsym|HyS0003.84	XP_002164845.2 PREDICTED: N-acetylglucosamine-1-phosphotransferase subunits alpha/beta-like [Hydra vulgaris]	0	N-acetylglucosamine-1-phosphate transferase subunits alpha and beta	GNPTAB	UDP-N-acetylglucosamine-lysosomal-enzyme N-acetylglucosaminephosphotransferase activity	N-glycan processing to lysosome	Golgi membrane
Hsym|HyS0003.85	XP_012559107.1 PREDICTED: uncharacterized protein LOC101240441 [Hydra vulgaris]	5e-59	NA	NA	NA	NA	NA
Hsym|HyS0003.86	XP_002163627.1 PREDICTED: coiled-coil-helix-coiled-coil-helix domain-containing protein C550.01c-like [Hydra vulgaris]	1e-07	Respiratory chain complex assembly protein	NA	NA	mitochondrial respiratory chain complex IV assembly	mitochondrial intermembrane space
Hsym|HyS0003.87	KXJ22981.1 hypothetical protein AC249_AIPGENE24246 [Exaiptasia pallida]	3.4e-31	NA	NA	NA	NA	NA
Hsym|HyS0003.88	XP_004210816.2 PREDICTED: CB1 cannabinoid receptor-interacting protein 1-like [Hydra vulgaris]	2e-26	CB1 cannabinoid receptor-interacting protein 1	NA	NA	NA	NA
Hsym|HyS0003.89	RPA73985.1 hypothetical protein BJ508DRAFT_43886 [Ascobolus immersus RN42]	0.00017	NA	NA	NA	NA	NA
Hsym|HyS0003.90	XP_012558385.1 PREDICTED: zinc finger protein 148-like [Hydra vulgaris]	2.7e-76	Low quality protein: zinc finger	NA	nucleic acid binding	regulation of transcription, DNA-templated	nuclear membrane
Hsym|HyS0003.91	XP_012558735.1 PREDICTED: transmembrane and TPR repeat-containing protein 2-like [Hydra vulgaris]	4e-169	Transmembrane and tetratricopeptide repeat containing 2	TMTC2	mannosyltransferase activity	protein O-linked mannosylation	integral component of membrane
Hsym|HyS0003.93	XP_002163175.1 PREDICTED: microtubule-associated proteins 1A/1B light chain 3C-like [Hydra vulgaris]	8.7e-55	Microtubule-associated protein 1 light chain 3 gamma	MAP1LC3C	ubiquitin protein ligase binding	autophagy	autophagosome
Hsym|HyS0003.94	XP_002163175.1 PREDICTED: microtubule-associated proteins 1A/1B light chain 3C-like [Hydra vulgaris]	6.4e-58	Microtubule-associated protein 1 light chain 3 gamma	MAP1LC3C	ubiquitin protein ligase binding	autophagy	autophagosome
Hsym|HyS0003.95	XP_004210345.1 PREDICTED: mechanosensory protein 2-like [Hydra vulgaris]	3.8e-111	Mechanosensory protein 2	NA	RNA polymerase binding	regulation of acid-sensing ion channel activity	integral component of membrane
Hsym|HyS0003.96	RMX37173.1 hypothetical protein pdam_00010691 [Pocillopora damicornis]	5e-99	Prohibitins and stomatins of the pid superfamily	MEC-2	cholesterol binding	mechanosensory behavior	integral component of membrane
Hsym|HyS0003.97	XP_004210345.1 PREDICTED: mechanosensory protein 2-like [Hydra vulgaris]	5e-111	Proline and serine rich 1	NA	RNA polymerase binding	regulation of acid-sensing ion channel activity	integral component of membrane
Hsym|HyS0003.98	XP_004212710.2 PREDICTED: uncharacterized protein PFB0145c-like, partial [Hydra vulgaris]	5.1e-48	Thyroid receptor-interacting protein 11	NA	NA	NA	integral component of membrane
Hsym|HyS0003.99	XP_004212710.2 PREDICTED: uncharacterized protein PFB0145c-like, partial [Hydra vulgaris]	4.6e-16	NA	NA	NA	NA	NA
Hsym|HyS0003.100	XP_002163353.1 PREDICTED: lipoma HMGIC fusion partner-like 2 protein [Hydra vulgaris]	1.4e-51	Lipoma HMGIC fusion partner-like 2 protein (Fragment)	NA	NA	NA	integral component of membrane
Hsym|HyS0003.101	XP_012561206.1 PREDICTED: uncharacterized protein LOC100197610 [Hydra vulgaris]	1.9e-47	AT-hook motif nuclear-localized protein 13	NA	peptidase activity	proteolysis	NA
Hsym|HyS0003.102	XP_012565012.1 PREDICTED: uncharacterized protein LOC101235290, partial [Hydra vulgaris]	1.6e-12	NA	NA	NA	NA	NA
Hsym|HyS0003.103	XP_027055304.1 ral GTPase-activating protein subunit beta-like [Pocillopora damicornis]	8.4e-140	Ral GTPase-activating protein subunit beta	NA	GTPase activator activity	positive regulation of GTPase activity	peroxisome
Hsym|HyS0003.104	XP_002158501.3 PREDICTED: ral GTPase-activating protein subunit beta-like, partial [Hydra vulgaris]	9.1e-52	Ral GTPase-activating protein subunit beta	RALGAPB	GTPase activator activity	regulation of small GTPase mediated signal transduction	peroxisome
Hsym|HyS0003.105	XP_004210469.2 PREDICTED: ral GTPase-activating protein subunit beta-like, partial [Hydra vulgaris]	1.6e-155	Ral GTPase-activating protein subunit beta	NA	GTPase activator activity	positive regulation of GTPase activity	NA
Hsym|HyS0003.106	XP_012565684.1 PREDICTED: transmembrane protein 242-like [Hydra vulgaris]	2e-11	NA	NA	NA	NA	NA
Hsym|HyS0003.107	XP_012566818.1 PREDICTED: uncharacterized protein LOC101238969 isoform X1 [Hydra vulgaris]	1.6e-276	Reverse transcriptase domain-containing protein	NA	NA	NA	NA
Hsym|HyS0003.108	XP_012554426.1 PREDICTED: hepatoma-derived growth factor-related protein 2-like [Hydra vulgaris]	5.7e-20	Hepatoma derived growth factor	NA	NA	NA	NA
Hsym|HyS0003.109	XP_012564156.1 PREDICTED: uncharacterized protein LOC105848559 [Hydra vulgaris]	1.2e-28	NA	NA	NA	NA	NA
Hsym|HyS0003.110	XP_002154736.1 PREDICTED: mitochondrial import receptor subunit TOM20 homolog [Hydra vulgaris]	4.9e-52	Translocase of outer mitochondrial membrane 20	TOMM20	mitochondrion targeting sequence binding	protein targeting	mitochondrial outer membrane translocase complex
Hsym|HyS0003.111	XP_020618949.1 histone acetyltransferase KAT5-like isoform X1 [Orbicella faveolata]	2.6e-98	Histone acetyltransferase	NA	histone acetyltransferase activity	histone acetylation	NuA4 histone acetyltransferase complex
Hsym|HyS0003.112	XP_012559872.1 PREDICTED: dynein heavy chain-like protein PF11_0240 [Hydra vulgaris]	1.4e-61	Dynein heavy chain	NA	aspartic-type endopeptidase activity	protein transport	integral component of membrane
Hsym|HyS0003.114	XP_012559873.1 PREDICTED: aldose 1-epimerase-like [Hydra vulgaris]	1.5e-106	Galactose mutarotase	NA	aldose 1-epimerase activity	hexose metabolic process	NA
Hsym|HyS0003.115	XP_012561593.1 PREDICTED: uncharacterized protein LOC105846941 [Hydra vulgaris]	8.8e-20	TIL domain-containing protein	NA	phosphatidylinositol-3-phosphate binding	ectoine biosynthetic process	autophagosome membrane
Hsym|HyS0003.119	XP_002159593.1 PREDICTED: ERO1-like protein beta isoform X1 [Hydra vulgaris]	3.7e-156	Endoplasmic reticulum oxidoreductase beta	NA	protein disulfide isomerase activity	oxidation-reduction process	endoplasmic reticulum
Hsym|HyS0003.120	XP_002159593.1 PREDICTED: ERO1-like protein beta isoform X1 [Hydra vulgaris]	7.2e-155	Endoplasmic reticulum oxidoreductase alpha	NA	protein disulfide isomerase activity	oxidation-reduction process	endoplasmic reticulum
Hsym|HyS0003.122	XP_012561701.1 PREDICTED: uncharacterized protein LOC100204258 [Hydra vulgaris]	1.2e-203	Putative P-loop containing nucleoside triphosphate hydrolase	NA	helicase activity	nucleic acid phosphodiester bond hydrolysis	integral component of membrane
Hsym|HyS0003.123	KHN85251.1 Glycogen phosphorylase, muscle form [Toxocara canis]	0	Glycogen phosphorylase	NA	linear malto-oligosaccharide phosphorylase activity	carbohydrate metabolic process	endoplasmic reticulum membrane
Hsym|HyS0003.124	XP_021340804.1 UMP-CMP kinase 2, mitochondrial-like isoform X1 [Mizuhopecten yessoensis]	2e-44	Cytidine/uridine monophosphate kinase 2	CMPK2	nucleoside monophosphate kinase activity	nucleoside monophosphate phosphorylation	mitochondrion
Hsym|HyS0003.126	XP_021340804.1 UMP-CMP kinase 2, mitochondrial-like isoform X1 [Mizuhopecten yessoensis]	2.5e-50	UMP-CMP kinase 2, mitochondrial	NA	nucleoside monophosphate kinase activity	nucleoside monophosphate phosphorylation	mitochondrion
Hsym|HyS0003.127	XP_012555441.1 PREDICTED: translation initiation factor IF-2, mitochondrial-like [Hydra vulgaris]	3e-191	Translation initiation factor IF-2, mitochondrial	INFB	translation initiation factor activity	translational initiation	cytoplasm
Hsym|HyS0003.128	XP_011661929.1 PREDICTED: adenylyltransferase and sulfurtransferase MOCS3-like isoform X2 [Strongylocentrotus purpuratus]	1.5e-130	Adenylyltransferase and sulfurtransferase MOCS3	MOCS3	thiosulfate sulfurtransferase activity	enzyme active site formation via cysteine modification to L-cysteine persulfide	cytosol
Hsym|HyS0003.129	XP_027038938.1 uncharacterized protein LOC113667327 [Pocillopora damicornis]	3.9e-22	Latent transforming growth factor beta binding protein 3	NA	calcium ion binding	extracellular matrix organization	extracellular region
Hsym|HyS0003.131	XP_017014315.1 PREDICTED: uncharacterized protein LOC108068947 [Drosophila takahashii]	3.2e-21	Latent transforming growth factor beta binding protein 1	NA	calcium ion binding	extracellular matrix organization	collagen-containing extracellular matrix
Hsym|HyS0003.132	XP_020603539.1 kinesin-like protein KIF16B [Orbicella faveolata]	2.5e-192	Kinesin motor domain-containing protein (Fragment)	KIF16B	microtubule motor activity	microtubule-based movement	phagocytic vesicle
Hsym|HyS0003.133	XP_002169650.2 PREDICTED: dystrophia myotonica WD repeat-containing protein-like [Hydra vulgaris]	4e-178	WD repeat-containing protein 20	NA	NA	NA	NA
Hsym|HyS0003.134	XP_012557747.1 PREDICTED: protein dispatched homolog 1-like [Hydra vulgaris]	0	Patched domain-containing protein 2 (Fragment)	NA	NA	smoothened signaling pathway	integral component of membrane
Hsym|HyS0003.135	XP_002158591.3 PREDICTED: kaptin-like [Hydra vulgaris]	5.2e-167	KICSTOR complex protein kaptin	NA	actin binding	actin filament organization	actin cytoskeleton
Hsym|HyS0003.136	XP_020914487.1 putative uncharacterized hydrolase YOR131C [Exaiptasia pallida]	2.1e-47	haloacid dehalogenase-like hydrolase domain-containing protein At2g33255 isoform X1	LOC107826920	hydrolase activity	NA	NA
Hsym|HyS0003.139	WP_042463043.1 6-bladed beta-propeller [Bacillus dielmoensis]	2.1e-15	NA	NA	NA	NA	NA
Hsym|HyS0003.140	PFX26685.1 E3 ubiquitin-protein ligase MIB2 [Stylophora pistillata]	1.2e-82	Skeletrophin	NA	ubiquitin-protein transferase activity	protein ubiquitination	NA
Hsym|HyS0003.141	XP_012561567.1 PREDICTED: uncharacterized protein LOC105846934, partial [Hydra vulgaris]	0	NA	NA	NA	NA	NA
Hsym|HyS0003.142	XP_012554580.1 PREDICTED: guanine nucleotide-binding protein G(q) subunit alpha [Hydra vulgaris]	6.1e-162	GTP binding protein alpha subunit Gq	NA	G-protein beta/gamma-subunit complex binding	G protein-coupled receptor signaling pathway	photoreceptor outer segment
Hsym|HyS0003.143	XP_002156847.1 PREDICTED: chromatin target of PRMT1 protein-like [Hydra vulgaris]	6.7e-07	Chromatin target of PRMT1	NA	NA	NA	NA
Hsym|HyS0003.144	OWF44057.1 Metal tolerance protein 3 [Mizuhopecten yessoensis]	2.6e-74	Cation efflux protein zinc transporter	NA	cation transmembrane transporter activity	cation transmembrane transport	integral component of membrane
Hsym|HyS0003.146	XP_002157643.3 PREDICTED: acidic leucine-rich nuclear phosphoprotein 32 family member B-like [Hydra vulgaris]	6.6e-49	Acidic leucine-rich nuclear phosphoprotein 32 family member B	NA	histone binding	NA	collagen-containing extracellular matrix
Hsym|HyS0003.147	XP_002155098.2 PREDICTED: protein LTV1 homolog [Hydra vulgaris]	9.6e-104	LTV1 ribosome biogenesis factor	NA	ribosome binding	ribosomal small subunit biogenesis	EGO complex
Hsym|HyS0003.148	XP_002157214.1 PREDICTED: dihydrofolate reductase-like [Hydra vulgaris]	9e-48	Bifunctional dihydrofolate reductase-thymidylate synthase	NA	dihydrofolate reductase activity	tetrahydrofolate biosynthetic process	mitochondrion
Hsym|HyS0003.149	XP_022779122.1 uncharacterized protein LOC111320711 [Stylophora pistillata]	3.5e-168	NA	NA	NA	NA	NA
Hsym|HyS0003.150	KXJ12627.1 Heterogeneous nuclear ribonucleoprotein D0 [Exaiptasia pallida]	4.4e-09	NA	NA	NA	NA	NA
Hsym|HyS0003.151	XP_002156265.2 PREDICTED: proteasome subunit alpha type-3-like [Hydra vulgaris]	1.6e-119	Proteasome endopeptidase complex	PSMA3	threonine-type endopeptidase activity	ubiquitin-dependent protein catabolic process	proteasome core complex, alpha-subunit complex
Hsym|HyS0003.152	XP_027038837.1 MAPK/MAK/MRK overlapping kinase-like isoform X2 [Pocillopora damicornis]	6e-132	MOK protein kinase	MOK	protein kinase activity	protein phosphorylation	ciliary base
Hsym|HyS0003.153	XP_004207716.2 PREDICTED: bifunctional ATP-dependent dihydroxyacetone kinase/FAD-AMP lyase (cyclizing)-like [Hydra vulgaris]	2.6e-186	Homodimeric dihydroxyacetone kinase	NA	glycerone kinase activity	glycerol metabolic process	cytosol
Hsym|HyS0003.154	XP_012556342.1 PREDICTED: T-complex protein 1 subunit alpha-like [Hydra vulgaris]	8.5e-70	NA	NA	NA	NA	NA
Hsym|HyS0003.155	XP_002154416.2 PREDICTED: integral membrane protein GPR137B-like [Hydra vulgaris]	5.1e-123	G protein-coupled receptor 137Ba	GPR137C	NA	NA	integral component of membrane
Hsym|HyS0003.156	XP_012556341.1 PREDICTED: uncharacterized protein LOC101240982 [Hydra vulgaris]	3.2e-28	NA	NA	NA	NA	NA
Hsym|HyS0003.157	XP_002157969.2 PREDICTED: protein couch potato-like isoform X1 [Hydra vulgaris]	2.1e-92	RNA-binding protein with multiple splicing	NA	RNA binding	hemidesmosome assembly	nucleus
Hsym|HyS0003.159	XP_002156977.1 PREDICTED: uncharacterized protein LOC100201344 [Hydra vulgaris]	8.9e-41	NA	NA	NA	NA	NA
Hsym|HyS0003.160	XP_012557739.1 PREDICTED: uncharacterized protein LOC105845013 [Hydra vulgaris]	5e-54	NA	NA	NA	NA	NA
Hsym|HyS0003.161	XP_020901910.1 ras-related protein Rab-13-like [Exaiptasia pallida]	1.4e-55	Purple acid phosphatase	NA	GTPase activity	Rab protein signal transduction	vesicle
Hsym|HyS0003.162	XP_028398668.1 uncharacterized protein LOC114522227 [Dendronephthya gigantea]	3.9e-55	G patch domain-containing protein 8	NA	nucleic acid binding	DNA integration	integral component of membrane
Hsym|HyS0003.163	KZS03382.1 Uncharacterized protein APZ42_033898 [Daphnia magna]	2.9e-16	NA	NA	NA	NA	NA
Hsym|HyS0003.164	XP_002162866.1 PREDICTED: uncharacterized protein LOC100206984 [Hydra vulgaris]	4.3e-83	NA	NA	NA	NA	NA
Hsym|HyS0003.165	XP_028392227.1 uncharacterized protein LOC114516841 [Dendronephthya gigantea]	4.3e-77	NA	NA	NA	NA	NA
Hsym|HyS0003.167	XP_012556720.1 PREDICTED: BRO1 domain-containing protein BROX-like isoform X1 [Hydra vulgaris]	1.8e-165	BRO1 domain and CAAX motif containing	BROX	alpha-1,6-mannosylglycoprotein 2-beta-N-acetylglucosaminyltransferase activity	oligosaccharide biosynthetic process	extracellular exosome
Hsym|HyS0003.168	XP_022083217.1 peptidyl-prolyl cis-trans isomerase FKBP2-like isoform X1 [Acanthaster planci]	4.1e-50	Peptidylprolyl isomerase	FKBP2	peptidyl-prolyl cis-trans isomerase activity	protein peptidyl-prolyl isomerization	membrane
Hsym|HyS0003.169	XP_002166171.3 PREDICTED: cysteine sulfinic acid decarboxylase-like [Hydra vulgaris]	7.5e-231	Cysteine sulfinic acid decarboxylase	NA	carboxy-lyase activity	carboxylic acid metabolic process	cytosol
Hsym|HyS0003.170	XP_002156026.2 PREDICTED: protein transport protein Sec23B-like [Hydra vulgaris]	0	Protein transport protein SEC23	NA	zinc ion binding	COPII-coated vesicle budding	COPII vesicle coat
Hsym|HyS0003.171	XP_001634809.1 predicted protein [Nematostella vectensis]	2.4e-36	NA	NA	NA	NA	NA
Hsym|HyS0003.172	XP_020894584.1 uncharacterized protein LOC110233617 [Exaiptasia pallida]	1.2e-99	TIR domain-containing protein (Fragment)	NA	NA	signal transduction	NA
Hsym|HyS0003.173	XP_012557116.1 PREDICTED: ubiquitin carboxyl-terminal hydrolase 34 [Hydra vulgaris]	0	Ubiquitin carboxyl-terminal hydrolase	USP34	thiol-dependent ubiquitinyl hydrolase activity	protein deubiquitination	intracellular part
Hsym|HyS0003.174	XP_013389106.1 prostaglandin reductase 2-like [Lingula anatina]	1e-100	Prostaglandin reductase 2	PTGR2	15-oxoprostaglandin 13-oxidase activity	prostanoid metabolic process	cytoplasm
Hsym|HyS0003.175	RXM32719.1 Fanconi anemia group B protein [Acipenser ruthenus]	4.8e-05	NA	NA	NA	NA	NA
Hsym|HyS0003.176	XP_012562427.1 PREDICTED: NADH dehydrogenase [ubiquinone] complex I, assembly factor 7-like isoform X2 [Hydra vulgaris]	1.3e-133	Protein arginine methyltransferase NDUFAF7 homolog, mitochondrial	NA	methyltransferase activity	methylation	mitochondrion
Hsym|HyS0003.177	XP_002162593.1 PREDICTED: thiosulfate sulfurtransferase-like [Hydra vulgaris]	7.8e-70	Thiosulfate sulfurtransferase	SSEA	thiosulfate sulfurtransferase activity	hydrogen sulfide biosynthetic process	neuron projection
Hsym|HyS0003.178	XP_002162593.1 PREDICTED: thiosulfate sulfurtransferase-like [Hydra vulgaris]	3.1e-66	Thiosulfate sulfurtransferase	NA	thiosulfate sulfurtransferase activity	hydrogen sulfide biosynthetic process	neuron projection
Hsym|HyS0003.179	XP_004206570.1 PREDICTED: lamin-B receptor-like isoform X1 [Hydra vulgaris]	8.2e-93	Lamin B receptor	TM7SF2	oxidoreductase activity, acting on the CH-CH group of donors, NAD or NADP as acceptor	oxidation-reduction process	nuclear inner membrane
Hsym|HyS0003.180	XP_004206570.1 PREDICTED: lamin-B receptor-like isoform X1 [Hydra vulgaris]	3.1e-61	Lamin-B receptor	NA	oxidoreductase activity, acting on the CH-CH group of donors	oxidation-reduction process	membrane
Hsym|HyS0003.181	XP_012561750.1 PREDICTED: uncharacterized protein LOC100202994 [Hydra vulgaris]	6.7e-168	Proto-oncogene tyrosine-protein kinase receptor ret	NA	protein tyrosine kinase activity	peptidyl-tyrosine phosphorylation	membrane raft
Hsym|HyS0003.182	XP_021351235.1 serine/threonine-protein kinase HT1-like [Mizuhopecten yessoensis]	3.3e-65	Receptor protein serine/threonine kinase	NA	transmembrane receptor protein serine/threonine kinase activity	transmembrane receptor protein serine/threonine kinase signaling pathway	activin receptor complex
Hsym|HyS0003.183	XP_028396247.1 kinesin light chain-like [Dendronephthya gigantea]	1.4e-110	Kinesin light chain	NA	microtubule motor activity	dorsal appendage formation	kinesin complex
Hsym|HyS0003.185	XP_012562886.1 PREDICTED: receptor-like tyrosine-protein kinase kin-16 [Hydra vulgaris]	3.3e-24	NA	NA	NA	NA	NA
Hsym|HyS0003.186	XP_020678106.1 calmodulin-like protein 11 [Dendrobium catenatum]	4.6e-27	Calmodulin	NA	calcium ion binding	calcium-mediated signaling	NA
Hsym|HyS0003.188	XP_001640526.1 predicted protein [Nematostella vectensis]	2.4e-10	NA	NA	NA	NA	NA
Hsym|HyS0003.189	XP_002154525.2 PREDICTED: talin-2 [Hydra vulgaris]	0	Kynurenine/alpha-aminoadipate aminotransferase mitochondrial kat/aadat kynurenine--oxoglutarate transaminase ii kynurenine aminotransferase ii kynurenine--oxoglutarate aminotransferase ii transaminase	TLN1	actin filament binding	cytoskeletal anchoring at plasma membrane	ruffle
Hsym|HyS0003.190	XP_012565576.1 PREDICTED: probable serine incorporator [Hydra vulgaris]	8e-136	Serine incorporator 3	SERINC3	NA	phosphatidylserine metabolic process	Golgi apparatus
Hsym|HyS0003.191	XP_002169362.2 PREDICTED: N-alpha-acetyltransferase 30-like [Hydra vulgaris]	4.4e-91	ankyrin repeat and ELMO domain-containing protein D	NAA30	N-acetyltransferase activity	N-terminal peptidyl-methionine acetylation	NatC complex
Hsym|HyS0003.192	XP_028409769.1 uncharacterized protein LOC114532461 [Dendronephthya gigantea]	6.1e-32	NA	NA	NA	NA	NA
Hsym|HyS0003.193	XP_004208357.2 PREDICTED: serine/threonine-protein phosphatase 2A 56 kDa regulatory subunit gamma isoform-like [Hydra vulgaris]	2.2e-238	Serine/threonine protein phosphatase 2A regulatory subunit	NA	protein phosphatase regulator activity	regulation of phosphoprotein phosphatase activity	protein phosphatase type 2A complex
Hsym|HyS0003.194	XP_012554698.1 PREDICTED: cell division control protein 24-like isoform X1 [Hydra vulgaris]	2.4e-133	Pleckstrin (PH) domain-containing protein	NA	Rho guanyl-nucleotide exchange factor activity	regulation of Rho protein signal transduction	NA
Hsym|HyS0003.195	XP_022779137.1 uncharacterized protein LOC111320723 [Stylophora pistillata]	3.1e-25	NA	NA	NA	NA	NA
Hsym|HyS0003.196	XP_001625715.1 predicted protein [Nematostella vectensis]	5.8e-17	NA	NA	NA	NA	NA
Hsym|HyS0003.197	XP_020631265.1 uncharacterized protein LOC110068221, partial [Orbicella faveolata]	2.1e-27	NA	NA	NA	NA	NA
Hsym|HyS0003.198	XP_001625715.1 predicted protein [Nematostella vectensis]	2.9e-32	NA	NA	NA	NA	NA
Hsym|HyS0003.199	XP_007910378.1 PREDICTED: exportin-1 [Callorhinchus milii]	0	Importin N-terminal domain-containing protein	XPO1	nuclear export signal receptor activity	nuclear export	nucleus
Hsym|HyS0003.200	XP_004208393.2 PREDICTED: uncharacterized protein LOC101235770 [Hydra vulgaris]	2.1e-195	Poly [ADP-ribose] polymerase 12 (Fragment)	NA	metal ion binding	NA	NA
Hsym|HyS0003.201	XP_002166596.2 PREDICTED: vesicle transport through interaction with t-SNAREs homolog 1B-like [Hydra vulgaris]	6.1e-43	Vesicle transport through interaction with t-SNAREs 1B	VTI1B	SNAP receptor activity	vesicle-mediated transport	Golgi apparatus
Hsym|HyS0003.202	XP_012561473.1 PREDICTED: putative ATP-dependent RNA helicase TDRD9 [Hydra vulgaris]	0	Mrna splicing factor atp-dependent rna helicase	TDRD9	helicase activity	negative regulation of transposition	piP-body
Hsym|HyS0003.203	XP_012560797.1 PREDICTED: ribonuclease Oy-like [Hydra vulgaris]	5.3e-68	Ribonuclease Oy	NA	ribonuclease T2 activity	RNA phosphodiester bond hydrolysis, endonucleolytic	extracellular region
Hsym|HyS0003.204	XP_012558731.1 PREDICTED: uncharacterized protein LOC105845472 [Hydra vulgaris]	1.6e-12	NA	NA	NA	NA	NA
Hsym|HyS0003.205	XP_015831958.1 PREDICTED: muscle, skeletal receptor tyrosine-protein kinase [Nothobranchius furzeri]	2.6e-14	NA	NA	NA	NA	NA
Hsym|HyS0003.207	RMX38635.1 hypothetical protein pdam_00024704 [Pocillopora damicornis]	2.8e-13	NA	NA	NA	NA	NA
Hsym|HyS0003.209	XP_028411998.1 uncharacterized protein LOC114534730 [Dendronephthya gigantea]	8.7e-20	NA	NA	NA	NA	NA
Hsym|HyS0003.210	XP_020621975.1 uncharacterized protein LOC110059588 [Orbicella faveolata]	3.6e-07	NA	NA	NA	NA	NA
Hsym|HyS0003.211	XP_015760477.1 PREDICTED: uncharacterized protein LOC107339686 [Acropora digitifera]	1.7e-51	ATP-dependent DNA helicase PIF1	NA	ubiquitin-protein transferase activity	protein ubiquitination	NA
Hsym|HyS0003.212	KXJ24601.1 Amiloride-sensitive amine oxidase [copper-containing] [Exaiptasia pallida]	4.5e-112	Amine oxidase	NA	primary amine oxidase activity	amine metabolic process	plasma membrane
Hsym|HyS0003.213	XP_021362537.1 muscle, skeletal receptor tyrosine protein kinase-like isoform X2 [Mizuhopecten yessoensis]	8.6e-16	Plasminogen	NA	serine-type endopeptidase activity	fibrinolysis	extracellular region
Hsym|HyS0003.214	XP_020614117.1 LOW QUALITY PROTEIN: uncharacterized protein LOC110052341 [Orbicella faveolata]	3.8e-101	Integrase catalytic domain-containing protein (Fragment)	NA	ubiquitin-protein transferase activity	DNA integration	NA
Hsym|HyS0003.216	OCU00922.1 hypothetical protein XELAEV_18006699mg [Xenopus laevis]	1.3e-17	NA	NA	NA	NA	NA
Hsym|HyS0003.217	XP_012556659.1 PREDICTED: uncharacterized protein LOC105844507, partial [Hydra vulgaris]	3.8e-08	NA	NA	NA	NA	NA
Hsym|HyS0003.218	XP_026531031.1 plasminogen [Notechis scutatus]	3.6e-14	muscle, skeletal receptor tyrosine-protein kinase	NA	serine-type endopeptidase activity	peptidyl-tyrosine phosphorylation	integral component of membrane
Hsym|HyS0003.219	XP_012557215.1 PREDICTED: uncharacterized protein LOC105844769 [Hydra vulgaris]	7.6e-103	NA	NA	NA	NA	NA
Hsym|HyS0003.220	XP_020893544.1 usherin-like [Exaiptasia pallida]	0	Laminin subunit alpha 3	USH2A	myosin binding	animal organ development	stereocilium membrane
Hsym|HyS0003.221	XP_020608275.1 cytochrome b5 domain-containing protein 1-like [Orbicella faveolata]	4.8e-96	Cytochrome b5 domain-containing protein 1	CYB5D1	metal ion binding	NA	nucleus
Hsym|HyS0003.222	XP_012558620.1 PREDICTED: WD repeat-containing protein 27-like [Hydra vulgaris]	2.3e-184	WD repeat-containing protein 27	WDR27	NA	NA	integral component of membrane
Hsym|HyS0003.223	XP_012554696.1 PREDICTED: sacsin-like [Hydra vulgaris]	0	Sacsin	SACS	NA	NA	NA
Hsym|HyS0003.224	XP_012566915.1 PREDICTED: tectonin beta-propeller repeat-containing protein 2-like [Hydra vulgaris]	0	Tectonin beta-propeller repeat-containing protein 2 (Fragment)	NA	NA	NA	NA
Hsym|HyS0003.225	XP_004205861.2 PREDICTED: regulator of microtubule dynamics protein 3-like [Hydra vulgaris]	7.9e-79	Regulator of microtubule dynamics protein 3	NA	NA	NA	integral component of membrane
Hsym|HyS0003.226	XP_012561152.1 PREDICTED: acyl-CoA synthetase family member 4-like [Hydra vulgaris]	8.6e-97	Aminoadipate-semialdehyde dehydrogenase	AASDH	catalytic activity	amino acid activation for nonribosomal peptide biosynthetic process	NA
Hsym|HyS0003.227	XP_012561169.1 PREDICTED: adenosine 3'-phospho 5'-phosphosulfate transporter 1-like [Hydra vulgaris]	1.5e-136	Adenosine 3'-phospho 5'-phosphosulfate transporter 1	SLC35B2	3'-phosphoadenosine 5'-phosphosulfate transmembrane transporter activity	3'-phosphoadenosine 5'-phosphosulfate transport	Golgi apparatus
Hsym|HyS0003.228	AAT11873.1 sine oculis-like transcription factor Six1/2 [Cladonema radiatum]	8.5e-83	Homeobox domain-containing protein (Fragment)	SIX1	transcription regulatory region sequence-specific DNA binding	positive regulation of mesenchymal cell proliferation involved in ureter development	nucleus
Hsym|HyS0003.229	XP_012557267.1 PREDICTED: methionine synthase-like [Hydra vulgaris]	0	5-methyltetrahydrofolate-homocysteine methyltransferase	MTR	methionine synthase activity	methionine biosynthetic process	cytosol
Hsym|HyS0003.230	XP_002159670.2 PREDICTED: E3 ubiquitin-protein ligase Praja-2-like [Hydra vulgaris]	2.1e-37	NA	NA	NA	NA	NA
Hsym|HyS0003.231	XP_012560114.1 PREDICTED: transcription factor 12-like isoform X1 [Hydra vulgaris]	9.6e-110	Transcription factor 4	TCF4	protein dimerization activity	cell differentiation	transcription factor complex
Hsym|HyS0003.232	XP_020624934.1 cytochrome c oxidase protein 20 homolog [Orbicella faveolata]	1.6e-12	NA	NA	NA	NA	NA
Hsym|HyS0003.233	XP_002158974.1 PREDICTED: HEAT repeat-containing protein 5B-like [Hydra vulgaris]	0	HEAT repeat-containing protein 5B	HEATR5B	protein binding	retrograde transport, endosome to Golgi	endocytic vesicle
Hsym|HyS0003.234	XP_002162000.1 PREDICTED: glutaredoxin-related protein 5, mitochondrial-like [Hydra vulgaris]	2.2e-48	Glutaredoxin	NA	protein disulfide oxidoreductase activity	cell redox homeostasis	cell
Hsym|HyS0003.235	PAA49736.1 hypothetical protein BOX15_Mlig030324g2 [Macrostomum lignano]	9.3e-22	NA	NA	NA	NA	NA
Hsym|HyS0003.236	XP_002158777.2 PREDICTED: zinc finger protein 37 homolog [Hydra vulgaris]	8.8e-25	NA	NA	NA	NA	NA
Hsym|HyS0003.237	XP_020914158.1 uncharacterized protein LOC110251768 [Exaiptasia pallida]	8.2e-92	Lysine-specific demethylase 8	NA	2-oxoglutarate-dependent dioxygenase activity	oxidation-reduction process	NA
Hsym|HyS0003.238	XP_012562085.1 PREDICTED: AT-rich interactive domain-containing protein 4B-like [Hydra vulgaris]	5.2e-132	AT-rich interactive domain-containing protein 4B	ARID4A	DNA binding	regulation of transcription by RNA polymerase II	nucleus
Hsym|HyS0003.239	XP_002166070.2 PREDICTED: DNA-directed RNA polymerases I and III subunit RPAC1-like isoform X1 [Hydra vulgaris]	2.4e-142	RNA polymerase I and III subunit C	POLR1C	DNA-directed 5'-3' RNA polymerase activity	transcription, DNA-templated	RNA polymerase I complex
Hsym|HyS0003.241	XP_020892981.1 glyoxylate reductase/hydroxypyruvate reductase-like [Exaiptasia pallida]	5.6e-90	Glyoxylate and hydroxypyruvate reductase	NA	NAD binding	oxidation-reduction process	cytosol
Hsym|HyS0003.242	XP_019643522.1 PREDICTED: SNARE-associated protein Snapin-like [Branchiostoma belcheri]	2e-21	SNARE-associated protein Snapin	SNAPIN	SNARE binding	intracellular protein transport	BLOC-1 complex
Hsym|HyS0003.243	RMX45590.1 hypothetical protein pdam_00013112 [Pocillopora damicornis]	6.7e-11	CHCH domain-containing protein (Fragment)	NA	NA	NA	NA
Hsym|HyS0003.244	XP_006825063.1 PREDICTED: secreted frizzled-related protein 3-like [Saccoglossus kowalevskii]	2e-33	Frizzled-4	NA	Wnt-activated receptor activity	Wnt signaling pathway	extracellular region
Hsym|HyS0003.246	XP_013814231.1 PREDICTED: disintegrin and metalloproteinase domain-containing protein 33-like isoform X1 [Apteryx australis mantelli]	1.7e-107	Zinc metalloproteinase-disintegrin VLAIP-A	NA	metalloendopeptidase activity	proteolysis	extracellular region
Hsym|HyS0003.247	XP_012554798.1 PREDICTED: uncharacterized protein LOC100201493 [Hydra vulgaris]	3.5e-13	NA	NA	NA	NA	NA
Hsym|HyS0003.248	XP_003384751.1 PREDICTED: AP-4 complex subunit sigma-1-like isoform X1 [Amphimedon queenslandica]	4.1e-48	AP complex subunit sigma	AP4S1	serine-type carboxypeptidase activity	intracellular protein transport	membrane coat
Hsym|HyS0003.249	XP_002164819.1 PREDICTED: RNA-binding protein Nova-1-like [Hydra vulgaris]	2.6e-124	RNA-binding protein Nova-2	NA	RNA binding	protein ADP-ribosylation	integral component of membrane
Hsym|HyS0003.250	CAA06314.1 PMP1 protein [Podocoryna carnea]	9.3e-71	Zinc metalloproteinase	NA	metalloendopeptidase activity	proteolysis	extracellular region
Hsym|HyS0003.251	CAJ57448.1 astacin 2 [Hydractinia echinata]	1.1e-67	Zinc metalloproteinase	NA	metalloendopeptidase activity	proteolysis	extracellular region
Hsym|HyS0003.252	XP_002160703.2 PREDICTED: pleckstrin homology domain-containing family A member 1-like [Hydra vulgaris]	9.5e-14	Pleckstrin-likey domain-containing family A member 1	NA	NA	NA	NA
Hsym|HyS0003.253	XP_022809379.1 dipeptidyl peptidase 3-like isoform X2 [Stylophora pistillata]	1.8e-232	Dipeptidyl peptidase 3	DPP3	dipeptidyl-peptidase activity	proteolysis	cytoplasm
Hsym|HyS0003.254	XP_002153855.1 PREDICTED: zinc metalloproteinase nas-4-like [Hydra vulgaris]	2e-11	NA	NA	NA	NA	NA
Hsym|HyS0003.255	XP_002160703.2 PREDICTED: pleckstrin homology domain-containing family A member 1-like [Hydra vulgaris]	9.8e-14	NA	NA	NA	NA	NA
Hsym|HyS0003.256	XP_028409829.1 dipeptidyl peptidase 3-like [Dendronephthya gigantea]	3.8e-256	Dipeptidyl peptidase 3	DPP3	dipeptidyl-peptidase activity	proteolysis	cytoplasm
Hsym|HyS0003.257	XP_012555189.1 PREDICTED: GTP cyclohydrolase 1-like [Hydra vulgaris]	8.4e-79	GTP cyclohydrolase I	NA	GTP cyclohydrolase I activity	tetrahydrofolate biosynthetic process	cytoplasm
Hsym|HyS0003.258	XP_002155517.1 PREDICTED: LDLR chaperone boca-like [Hydra vulgaris]	2.1e-44	Mesoderm development candidate 2	NA	NA	protein folding	integral component of membrane
Hsym|HyS0003.259	XP_022783603.1 ectopic P granules protein 5 homolog [Stylophora pistillata]	0	Ectopic P granules protein 5 homolog (Fragment)	NA	NA	autophagy	NA
Hsym|HyS0003.260	XP_017087905.1 PREDICTED: receptor expression-enhancing protein 5 isoform X1 [Drosophila bipectinata]	5.5e-08	NA	NA	NA	NA	NA
Hsym|HyS0003.261	XP_012563856.1 PREDICTED: fibrous sheath-interacting protein 1-like [Hydra vulgaris]	5.6e-24	NA	NA	NA	NA	NA
Hsym|HyS0003.262	XP_002164351.2 PREDICTED: kelch-like protein 28 [Hydra vulgaris]	1e-102	Ring canal kelch	NA	NA	NA	NA
Hsym|HyS0003.263	XP_020618472.1 selenoprotein N-like [Orbicella faveolata]	6.8e-23	EF-hand domain-containing protein	NA	calcium ion binding	skeletal muscle fiber development	endoplasmic reticulum membrane
Hsym|HyS0003.264	XP_012558386.1 PREDICTED: selenoprotein N-like [Hydra vulgaris]	8.6e-76	Selenoprotein N	NA	calcium ion binding	skeletal muscle fiber development	endoplasmic reticulum membrane
Hsym|HyS0003.266	XP_012561939.1 PREDICTED: presenilin-1-like [Hydra vulgaris]	2.1e-141	Presenilin	PSEN1	aspartic-type endopeptidase activity	Notch signaling pathway	Golgi membrane
Hsym|HyS0003.267	XP_004206540.1 PREDICTED: ceramide phosphoethanolamine synthase-like [Hydra vulgaris]	9.4e-107	Ceramide phosphoethanolamine synthase	NA	NA	NA	integral component of membrane
Hsym|HyS0003.268	XP_002156538.2 PREDICTED: protein ERGIC-53-like [Hydra vulgaris]	6.5e-180	Lectin mannose-binding 1	LMAN1	mannose binding	endoplasmic reticulum to Golgi vesicle-mediated transport	cytoplasm
Hsym|HyS0003.269	XP_012561884.1 PREDICTED: nuclear pore complex protein DDB_G0274915-like, partial [Hydra vulgaris]	4.6e-17	NA	NA	NA	NA	NA
Hsym|HyS0003.270	XP_015761398.1 PREDICTED: uncharacterized protein LOC107340554 isoform X1 [Acropora digitifera]	9.9e-25	NA	NA	NA	NA	NA
Hsym|HyS0003.271	XP_012554557.1 PREDICTED: kinesin-related protein 5-like isoform X1 [Hydra vulgaris]	2.3e-286	Kinesin heavy chain	NA	microtubule motor activity	microtubule-based movement	cytoskeleton
Hsym|HyS0003.272	XP_012562775.1 PREDICTED: uncharacterized protein LOC105847626 [Hydra vulgaris]	2.3e-31	NA	NA	NA	NA	NA
Hsym|HyS0003.274	XP_012562775.1 PREDICTED: uncharacterized protein LOC105847626 [Hydra vulgaris]	6.6e-47	NA	NA	NA	NA	NA
Hsym|HyS0003.275	XP_012554560.1 PREDICTED: seipin-like isoform X1 [Hydra vulgaris]	6.4e-46	BSCL2, seipin lipid droplet biogenesis associated	NA	NA	lipid storage	integral component of membrane
Hsym|HyS0003.276	XP_028392828.1 cytochrome c oxidase subunit NDUFA4-like [Dendronephthya gigantea]	3e-05	NA	NA	NA	NA	NA
Hsym|HyS0003.277	XP_027055346.1 uncharacterized protein LOC113682384 isoform X2 [Pocillopora damicornis]	3.7e-27	NA	NA	NA	NA	NA
Hsym|HyS0003.279	XP_012553815.1 PREDICTED: neuropeptide Y receptor type 5-like [Hydra vulgaris]	8.1e-31	NA	NA	NA	NA	NA
Hsym|HyS0003.280	XP_012560853.1 PREDICTED: uncharacterized aarF domain-containing protein kinase 1-like [Hydra vulgaris]	9.3e-151	AarF domain-containing protein kinase 1	ADCK1	protein kinase activity	protein phosphorylation	extracellular region
Hsym|HyS0003.281	XP_004210131.2 PREDICTED: ketimine reductase mu-crystallin-like [Hydra vulgaris]	4.4e-76	Thiomorpholine-carboxylate dehydrogenase	CRYM	hormone binding	thyroid hormone transport	cytosol
Hsym|HyS0003.282	XP_004205773.1 PREDICTED: uncharacterized protein LOC101238258 [Hydra vulgaris]	6.4e-13	NA	NA	NA	NA	NA
Hsym|HyS0003.283	XP_002156578.1 PREDICTED: zinc finger FYVE domain-containing protein 21-like [Hydra vulgaris]	1.2e-60	Zinc finger FYVE domain-containing protein 21	ZFYVE21	metal ion binding	NA	NA
Hsym|HyS0003.284	XP_020906972.1 double-stranded RNA-specific adenosine deaminase-like [Exaiptasia pallida]	8.2e-66	RNA-specific Adenosine deaminase Transcript variant M	ADAR	double-stranded RNA adenosine deaminase activity	RNA processing	supraspliceosomal complex
Hsym|HyS0003.285	XP_027046389.1 coadhesin-like [Pocillopora damicornis]	2.6e-31	Cartilage intermediate layer protein 2	HMCN1	calcium ion binding	response to bacterium	basement membrane
Hsym|HyS0003.286	XP_006825339.1 PREDICTED: uncharacterized protein LOC100378937, partial [Saccoglossus kowalevskii]	0.00019	NA	NA	NA	NA	NA
Hsym|HyS0003.287	XP_012556047.1 PREDICTED: protein mago nashi homolog 2 [Hydra vulgaris]	2.5e-72	RNA-binding protein Mago nashi	MAGOH	RNA binding	RNA splicing	exon-exon junction complex
Hsym|HyS0003.288	XP_012554743.1 PREDICTED: uncharacterized protein LOC101240159 [Hydra vulgaris]	1.7e-33	NA	NA	NA	NA	NA
Hsym|HyS0003.289	XP_002166522.2 PREDICTED: eukaryotic initiation factor 4A-III [Hydra vulgaris]	7.5e-216	DEAD box ATP-dependent RNA helicase	EIF4A3	helicase activity	translational initiation	catalytic step 2 spliceosome
Hsym|HyS0003.290	XP_006825339.1 PREDICTED: uncharacterized protein LOC100378937, partial [Saccoglossus kowalevskii]	0.00021	NA	NA	NA	NA	NA
Hsym|HyS0003.291	XP_012556047.1 PREDICTED: protein mago nashi homolog 2 [Hydra vulgaris]	2.5e-72	RNA-binding protein Mago nashi	MAGOH	RNA binding	RNA splicing	exon-exon junction complex
Hsym|HyS0003.292	XP_012556101.1 PREDICTED: RNMT-activating mini protein-like [Hydra vulgaris]	1.4e-09	Splicing factor PWI domain-containing protein	NA	NA	mRNA processing	NA
Hsym|HyS0003.293	XP_012554743.1 PREDICTED: uncharacterized protein LOC101240159 [Hydra vulgaris]	1e-33	NA	NA	NA	NA	NA
Hsym|HyS0003.294	XP_002166522.2 PREDICTED: eukaryotic initiation factor 4A-III [Hydra vulgaris]	3.7e-216	DEAD box ATP-dependent RNA helicase	EIF4A3	helicase activity	translational initiation	catalytic step 2 spliceosome
Hsym|HyS0003.295	XP_027042269.1 putative FERM domain-containing protein FRMD8P1 [Pocillopora damicornis]	8.4e-67	FERM domain-containing protein 8	NA	NA	NA	cytoskeleton
Hsym|HyS0003.297	XP_002165730.3 PREDICTED: acetyl-coenzyme A synthetase 2-like, mitochondrial [Hydra vulgaris]	5.4e-284	Acetyl-coenzyme A synthetase	ACSS1	AMP binding	acetyl-CoA biosynthetic process from acetate	mitochondrial matrix
Hsym|HyS0003.298	AAX84777.1 bZIP transcription factor-like protein, partial [Hydractinia echinata]	1.1e-81	Basic region leucine zipper	HLF	DNA-binding transcription factor activity	regulation of transcription by RNA polymerase II	nucleus
Hsym|HyS0003.299	XP_002165829.1 PREDICTED: 26S protease regulatory subunit 4 [Hydra vulgaris]	1.9e-221	26S protease regulatory subunit	NA	proteasome-activating ATPase activity	positive regulation of proteasomal protein catabolic process	proteasome complex
Hsym|HyS0003.300	XP_028394125.1 uncharacterized protein LOC114518347 [Dendronephthya gigantea]	8e-09	Collagen type i ii iii v xi alpha	NA	extracellular matrix structural constituent	extracellular matrix organization	collagen trimer
Hsym|HyS0003.301	XP_020608880.1 uncharacterized protein LOC110047468, partial [Orbicella faveolata]	9.1e-12	Collagen triple helix repeat	NA	extracellular matrix structural constituent	pathogenesis	collagen trimer
Hsym|HyS0003.302	XP_020632235.1 uncharacterized protein LOC110069118 [Orbicella faveolata]	1e-24	Hexosyltransferase	NA	UDP-galactosyltransferase activity	protein O-linked glycosylation	Golgi membrane
Hsym|HyS0003.303	XP_028393657.1 uncharacterized protein LOC114517993 [Dendronephthya gigantea]	5.1e-43	NA	NA	NA	NA	NA
Hsym|HyS0003.304	XP_012555939.1 PREDICTED: anaphase-promoting complex subunit 1-like, partial [Hydra vulgaris]	0	Anaphase promoting complex subunit 1	ANAPC1	protein binding	protein K11-linked ubiquitination	anaphase-promoting complex
Hsym|HyS0003.305	XP_027038835.1 DNA repair protein XRCC3-like [Pocillopora damicornis]	1e-60	X-ray repair complementing defective repair in Chinese hamster cells 3	NA	DNA-dependent ATPase activity	DNA repair	Rad51C-XRCC3 complex
Hsym|HyS0003.306	XP_002130702.1 uncharacterized protein LOC100179588 [Ciona intestinalis]	5.9e-30	NA	NA	NA	NA	NA
Hsym|HyS0003.307	XP_012553661.1 PREDICTED: uncharacterized protein LOC100206910 [Hydra vulgaris]	3.7e-08	NA	NA	NA	NA	NA
Hsym|HyS0003.308	CAJ80868.1 Gremlin-like 1 precursor [Hydra vulgaris]	1.6e-13	NA	NA	NA	NA	NA
Hsym|HyS0003.309	NP_001296594.1 acid-sensing ion channel 1-like [Hydra vulgaris]	2.1e-149	Acid-sensing ion channel 1	NA	sodium channel activity	sodium ion transmembrane transport	integral component of membrane
Hsym|HyS0003.310	XP_020608880.1 uncharacterized protein LOC110047468, partial [Orbicella faveolata]	1.2e-11	Collagen triple helix repeat	NA	carbohydrate binding	pathogenesis	collagen trimer
Hsym|HyS0003.311	XP_028394125.1 uncharacterized protein LOC114518347 [Dendronephthya gigantea]	4e-08	Collagen type i ii iii v xi alpha	NA	extracellular matrix structural constituent	extracellular matrix organization	collagen trimer
Hsym|HyS0003.312	XP_002165225.1 PREDICTED: sphingosine-1-phosphate phosphatase 2-like [Hydra vulgaris]	6.5e-143	LOW QUALITY PROTEIN: sphingosine-1-phosphate phosphatase 1	SGPP1	sphingosine-1-phosphate phosphatase activity	sphinganine-1-phosphate metabolic process	nucleoplasm
Hsym|HyS0003.313	XP_012554883.1 PREDICTED: mitochondrial amidoxime reducing component 2-like [Hydra vulgaris]	1.4e-59	Molybdenum cofactor sulfurase	NA	molybdenum ion binding	NA	NA
Hsym|HyS0003.314	XP_002164291.1 PREDICTED: N(G),N(G)-dimethylarginine dimethylaminohydrolase 1-like [Hydra vulgaris]	4.4e-56	Dimethylarginine dimethylaminohydrolase	DDAH1	dimethylargininase activity	citrulline metabolic process	extracellular exosome
Hsym|HyS0003.315	XP_002164291.1 PREDICTED: N(G),N(G)-dimethylarginine dimethylaminohydrolase 1-like [Hydra vulgaris]	2.7e-64	Dimethylarginine dimethylaminohydrolase I	DDAH1	dimethylargininase activity	citrulline metabolic process	extracellular exosome
Hsym|HyS0003.316	XP_002166358.1 PREDICTED: CDK-activating kinase assembly factor MAT1-like [Hydra vulgaris]	4.8e-91	Camp-dependent protein kinase catalytic subunit	NA	cyclin-dependent protein serine/threonine kinase activator activity	positive regulation of cyclin-dependent protein serine/threonine kinase activity	transcription factor TFIIH holo complex
Hsym|HyS0003.317	XP_012554128.1 PREDICTED: uncharacterized protein LOC101240258 [Hydra vulgaris]	1.2e-60	NA	NA	NA	NA	NA
Hsym|HyS0003.318	XP_004205978.1 PREDICTED: protein dpy-30 homolog isoform X1 [Hydra vulgaris]	1.8e-21	Dosage compensation protein dpy-30 (inferred by orthology to a C. elegans protein)	NA	methyltransferase activity	methylation	MLL3/4 complex
Hsym|HyS0003.320	XP_020605295.1 uncharacterized protein LOC110044115 [Orbicella faveolata]	1.9e-112	Myxococcus cysteine-rich repeat-containing protein	NA	calcium ion binding	endocardial cell development	extracellular matrix
Hsym|HyS0003.321	XP_012555405.1 PREDICTED: intracellular protein transport protein USO1-like [Hydra vulgaris]	1.4e-51	NA	NA	NA	NA	NA
Hsym|HyS0003.322	XP_002160810.1 PREDICTED: putative deoxyribonuclease TATDN1 [Hydra vulgaris]	2.6e-116	TatD DNase domain containing 1	TATDN1	endodeoxyribonuclease activity, producing 5'-phosphomonoesters	DNA metabolic process	nucleoplasm
Hsym|HyS0003.323	XP_002159424.2 PREDICTED: DNA polymerase kappa-like [Hydra vulgaris]	1.3e-146	Dna-directed polymerase kappa	NA	damaged DNA binding	DNA biosynthetic process	nucleus
Hsym|HyS0003.324	XP_012555720.1 PREDICTED: membrane progestin receptor gamma-B-like [Hydra vulgaris]	3e-62	NA	NA	NA	NA	NA
Hsym|HyS0003.325	XP_002158212.1 PREDICTED: heme-binding protein 1-like [Hydra vulgaris]	2e-23	NA	NA	NA	NA	NA
Hsym|HyS0003.326	XP_012555721.1 PREDICTED: uncharacterized protein LOC101238827 [Hydra vulgaris]	7.9e-09	NA	NA	NA	NA	NA
Hsym|HyS0003.327	RLA94875.1 acetate kinase [Deltaproteobacteria bacterium]	1.5e-92	Acetate kinase	ACKA	acetate kinase activity	acetyl-CoA biosynthetic process	cytoplasm
Hsym|HyS0003.328	WP_014262292.1 acetate kinase [Filifactor alocis]	3.3e-27	Acetate kinase	ACKA	acetate kinase activity	acetyl-CoA biosynthetic process	cytoplasm
Hsym|HyS0003.329	XP_020618783.1 hydrolethalus syndrome protein 1-like [Orbicella faveolata]	3e-37	NA	NA	NA	NA	NA
Hsym|HyS0003.331	XP_012555377.1 PREDICTED: mothers against decapentaplegic homolog 4-like [Hydra vulgaris]	3.9e-182	Mothers against decapentaplegic homolog	NA	DNA-binding transcription factor activity	transforming growth factor beta receptor signaling pathway	transcription factor complex
Hsym|HyS0003.332	XP_004205450.1 PREDICTED: uncharacterized protein LOC101239215 [Hydra vulgaris]	1.8e-28	NA	NA	NA	NA	NA
Hsym|HyS0003.334	ELT88782.1 hypothetical protein CAPTEDRAFT_208812, partial [Capitella teleta]	3.7e-07	NA	NA	NA	NA	NA
Hsym|HyS0003.339	NP_001267851.1 leucine-rich repeat 2 precursor [Hydra vulgaris]	2.8e-05	NA	NA	NA	NA	NA
Hsym|HyS0003.340	XP_013420550.1 muscle, skeletal receptor tyrosine protein kinase [Lingula anatina]	6.3e-13	Plasminogen activator	PLAT	serine-type endopeptidase activity	smooth muscle cell migration	extracellular region
Hsym|HyS0003.341	EFB19175.1 hypothetical protein PANDA_000617, partial [Ailuropoda melanoleuca]	5.8e-08	NA	NA	NA	NA	NA
Hsym|HyS0003.343	PFX22769.1 hypothetical protein AWC38_SpisGene12708 [Stylophora pistillata]	1.3e-11	HIRAN domain-containing protein	NA	zinc ion binding	NA	NA
Hsym|HyS0003.344	XP_002592208.1 hypothetical protein BRAFLDRAFT_84636 [Branchiostoma floridae]	7.2e-70	DDE-1 domain-containing protein (Fragment)	NA	nucleic acid binding	NA	NA
Hsym|HyS0003.346	PFX18231.1 putative uncharacterized transposon-derived protein F54H12.3 [Stylophora pistillata]	2.6e-23	NA	NA	NA	NA	NA
Hsym|HyS0003.347	XP_012556371.1 PREDICTED: neutral alpha-glucosidase AB [Hydra vulgaris]	0	ANeutral alpha-glucosidase AB	NA	carbohydrate binding	carbohydrate metabolic process	glucosidase II complex
Hsym|HyS0003.348	XP_002160503.3 PREDICTED: stress-induced-phosphoprotein 1-like [Hydra vulgaris]	1.6e-137	Peroxisomal leader peptide-processing protease	STIP1	Hsp90 protein binding	response to interleukin-7	chaperone complex
Hsym|HyS0003.349	XP_012559578.1 PREDICTED: carbohydrate sulfotransferase 1-like [Hydra vulgaris]	1e-67	NA	NA	NA	NA	NA
Hsym|HyS0003.353	RNA25195.1 potassium channel subfamily K member 1-like isoform X1 [Brachionus plicatilis]	6.9e-27	TWiK family of potassium channels protein 7	NA	potassium channel activity	potassium ion transmembrane transport	integral component of plasma membrane
Hsym|HyS0003.354	XP_012563672.1 PREDICTED: mediator of RNA polymerase II transcription subunit 6-like [Hydra vulgaris]	2.2e-54	Mediator of RNA polymerase II transcription subunit 6	MED6	transcription coregulator activity	regulation of transcription by RNA polymerase II	mediator complex
Hsym|HyS0003.355	XP_002170222.2 PREDICTED: RAB6-interacting golgin-like [Hydra vulgaris]	4.7e-19	N-terminal kinase-like-binding protein 1 (Fragment)	NA	kinase activity	phosphorylation	NA
Hsym|HyS0003.356	XP_027036353.1 F-box/LRR-repeat protein 20-like [Pocillopora damicornis]	4.1e-45	NA	NA	NA	NA	NA
Hsym|HyS0003.357	ABA42601.1 BMP2/4 [Podocoryna carnea]	3.5e-109	Aprataxin and PNKP like factor	NA	growth factor activity	double-strand break repair	extracellular region
Hsym|HyS0003.358	XP_002601948.1 hypothetical protein BRAFLDRAFT_86432 [Branchiostoma floridae]	2.3e-08	NA	NA	NA	NA	NA
Hsym|HyS0003.361	XP_020618126.1 L-2-hydroxyglutarate dehydrogenase, mitochondrial-like [Orbicella faveolata]	5.2e-150	Mitogen-activated protein kinase kinase kinase kinase 5	L2HGDH	oxidoreductase activity	oxidation-reduction process	mitochondrion
Hsym|HyS0003.362	XP_002159916.1 PREDICTED: reticulon-3-B-like [Hydra vulgaris]	7.5e-47	Reticulon-like protein (Fragment)	NA	NA	NA	endoplasmic reticulum membrane
Hsym|HyS0003.363	XP_002168455.3 PREDICTED: transmembrane protein 62-like isoform X1 [Hydra vulgaris]	5.5e-145	1-phosphatidylinositol 4,5-bisphosphate phosphodiesterase beta-2	TMEM62	hydrolase activity	ion transmembrane transport	integral component of membrane
Hsym|HyS0003.365	XP_012562476.1 PREDICTED: uncharacterized protein LOC105847438 [Hydra vulgaris]	3.8e-27	NA	NA	NA	NA	NA
Hsym|HyS0003.366	XP_002167217.2 PREDICTED: uncharacterized protein LOC100211293 [Hydra vulgaris]	9.1e-190	Twin-arginine translocation pathway signal	NA	NA	NA	integral component of membrane
Hsym|HyS0003.367	XP_002169235.3 PREDICTED: protein YIPF3-like [Hydra vulgaris]	3.7e-121	Putative natural killer cell-specific antigen KLIP1	YIPF3	NA	cell differentiation	transport vesicle
Hsym|HyS0003.369	XP_004206566.2 PREDICTED: UBX domain-containing protein 1-B-like [Hydra vulgaris]	1.3e-45	UBX domain-containing protein 1	UBXN1	nucleic acid binding	negative regulation of protein K48-linked deubiquitination	VCP-NPL4-UFD1 AAA ATPase complex
Hsym|HyS0003.370	PIK39345.1 hypothetical protein BSL78_23809 [Apostichopus japonicus]	4.9e-13	NA	NA	NA	NA	NA
Hsym|HyS0003.372	XP_002160855.1 PREDICTED: sepiapterin reductase-like [Hydra vulgaris]	1.1e-49	Sepiapterin reductase	NA	sepiapterin reductase activity	tetrahydrobiopterin biosynthetic process	NA
Hsym|HyS0003.373	XP_002159518.2 PREDICTED: trafficking protein particle complex subunit 4-like [Hydra vulgaris]	4.3e-89	Trafficking protein particle complex subunit 4	TRAPPC4	Rab guanyl-nucleotide exchange factor activity	vesicle-mediated transport	TRAPP complex
Hsym|HyS0003.374	XP_002154794.2 PREDICTED: serine/threonine-protein phosphatase 2A 56 kDa regulatory subunit epsilon isoform-like [Hydra vulgaris]	7.7e-229	Serine/threonine protein phosphatase 2A regulatory subunit	NA	protein phosphatase regulator activity	regulation of phosphoprotein phosphatase activity	protein phosphatase type 2A complex
Hsym|HyS0003.375	XP_002158382.2 PREDICTED: uncharacterized protein LOC100209907 isoform X3 [Hydra vulgaris]	4.9e-224	Transcriptional-regulating factor	NA	DNA binding	regulation of transcription, DNA-templated	nucleus
Hsym|HyS0003.376	XP_012560855.1 PREDICTED: WD repeat-containing protein 62-like [Hydra vulgaris]	0	Mitogen-activated protein kinase-binding protein 1	NA	kinase activity	phosphorylation	integral component of membrane
Hsym|HyS0003.377	XP_012556417.1 PREDICTED: P-selectin-like isoform X1 [Hydra vulgaris]	4.8e-39	NA	NA	NA	NA	NA
Hsym|HyS0003.378	XP_018778881.1 PREDICTED: complement receptor type 1 [Serinus canaria]	2.5e-17	NA	NA	NA	NA	NA
Hsym|HyS0003.382	XP_002162633.2 PREDICTED: zinc finger protein 567-like [Hydra vulgaris]	5.9e-42	Zinc finger and SCAN domain-containing protein 2	NA	nucleic acid binding	regulation of nitrogen compound metabolic process	nucleus
Hsym|HyS0003.383	XP_002408133.1 zinc finger protein, putative [Ixodes scapularis]	1.4e-10	NA	NA	NA	NA	NA
Hsym|HyS0003.384	XP_028410079.1 kelch-like protein 12 [Dendronephthya gigantea]	4.4e-51	NA	NA	NA	NA	NA
Hsym|HyS0003.385	KXJ28425.1 Matrilin-2 [Exaiptasia pallida]	1.5e-101	EGF containing fibulin extracellular matrix protein 1	NA	calcium ion binding	extracellular matrix organization	collagen-containing extracellular matrix
Hsym|HyS0003.386	XP_012553563.1 PREDICTED: uncharacterized protein LOC105843149 isoform X1 [Hydra vulgaris]	4e-16	NA	NA	NA	NA	NA
Hsym|HyS0003.388	XP_002158891.1 PREDICTED: T-complex protein 1 subunit delta-like [Hydra vulgaris]	2.6e-249	T-complex protein 1 subunit delta	CCT4	unfolded protein binding	protein folding	chaperonin-containing T-complex
Hsym|HyS0003.389	XP_012555470.1 PREDICTED: BTB/POZ domain-containing protein KCTD3 isoform X2 [Hydra vulgaris]	2.3e-282	Potassium channel tetramerization domain-containing 3	KCTD3	phospholipid binding	protein homooligomerization	plasma membrane
Hsym|HyS0003.391	XP_028392086.1 PI-PLC X domain-containing protein 3-like [Dendronephthya gigantea]	1.9e-40	NA	NA	NA	NA	NA
Hsym|HyS0003.392	XP_020900160.1 radial spoke head protein 4 homolog A-like [Exaiptasia pallida]	8.3e-139	Radial spoke head protein 4 like protein A	RSPH4A	NA	cilium movement involved in cell motility	radial spoke
Hsym|HyS0003.393	XP_012553982.1 PREDICTED: uncharacterized protein LOC100205280 [Hydra vulgaris]	1.3e-25	NA	NA	NA	NA	NA
Hsym|HyS0003.394	XP_002166042.2 PREDICTED: uncharacterized protein LOC100215549 [Hydra vulgaris]	1.1e-22	NA	NA	NA	NA	NA
Hsym|HyS0003.397	XP_002157477.1 PREDICTED: RNA-binding protein 25-like isoform X1 [Hydra vulgaris]	4.2e-172	RNA binding motif protein 25	RBM25	RNA binding	mRNA processing	nuclear speck
Hsym|HyS0003.398	XP_002167359.2 PREDICTED: cell differentiation protein RCD1 homolog [Hydra vulgaris]	3.1e-154	Cell differentiation protein RCD1	NA	epidermal growth factor receptor binding	mRNA catabolic process	CCR4-NOT complex
Hsym|HyS0003.400	XP_013385302.1 crossover junction endonuclease MUS81 isoform X2 [Lingula anatina]	1.1e-132	MUS81 structure-specific endonuclease subunit	MUS81	nuclease activity	nucleic acid phosphodiester bond hydrolysis	Holliday junction resolvase complex
Hsym|HyS0003.401	XP_012554633.1 PREDICTED: uncharacterized protein LOC100198865 [Hydra vulgaris]	2.8e-212	Xylosyltransferase oxt	OXT	transferase activity	NA	NA
Hsym|HyS0003.404	XP_004209734.1 PREDICTED: uncharacterized protein LOC101236906 [Hydra vulgaris]	6.9e-15	NA	NA	NA	NA	NA
Hsym|HyS0003.405	XP_012559228.1 PREDICTED: uncharacterized protein LOC100199166 [Hydra vulgaris]	1.2e-253	Receptor protein-tyrosine kinase	PR2	protein tyrosine kinase activity	peptidyl-tyrosine phosphorylation	focal adhesion
Hsym|HyS0003.406	XP_004207957.1 PREDICTED: uncharacterized protein LOC100213807 [Hydra vulgaris]	3.2e-179	NA	NA	NA	NA	NA
Hsym|HyS0003.407	XP_004206198.2 PREDICTED: uncharacterized protein LOC101239060 [Hydra vulgaris]	1.3e-96	NA	NA	NA	NA	NA
Hsym|HyS0003.410	XP_028419292.1 tetratricopeptide repeat protein 28-like [Dendronephthya gigantea]	0.00048	NA	NA	NA	NA	NA
Hsym|HyS0003.411	XP_012555349.1 PREDICTED: uncharacterized protein LOC100215907 [Hydra vulgaris]	3.7e-14	Arabinofuranosidase	NA	alpha-L-arabinofuranosidase activity	L-arabinose metabolic process	NA
Hsym|HyS0003.414	XP_027044057.1 solute carrier organic anion transporter family member 4A1-like [Pocillopora damicornis]	6e-106	Solute carrier organic anion transporter family, member 2A1 (Fragment)	SLCO2A1	NA	transmembrane transport	integral component of membrane
Hsym|HyS0003.415	XP_004210898.1 PREDICTED: GTP-binding protein Di-Ras2-like [Hydra vulgaris]	2.8e-16	NA	NA	NA	NA	NA
Hsym|HyS0003.416	XP_022241145.1 zinc finger protein 260-like isoform X1 [Limulus polyphemus]	3.6e-15	THAP-type domain-containing protein	NA	DNA binding	NA	NA
Hsym|HyS0003.417	XP_027035760.1 neuropeptide FF receptor 1-like [Pocillopora damicornis]	1.3e-30	NA	NA	NA	NA	NA
Hsym|HyS0003.418	XP_015759230.1 PREDICTED: serine/threonine-protein phosphatase 6 regulatory ankyrin repeat subunit C-like [Acropora digitifera]	4e-26	NA	NA	NA	NA	NA
Hsym|HyS0003.419	RFU23819.1 hypothetical protein B7463_g12519, partial [Scytalidium lignicola]	5.2e-10	NA	NA	NA	NA	NA
Hsym|HyS0003.420	XP_020627649.1 N-acetylated-alpha-linked acidic dipeptidase 2-like isoform X1 [Orbicella faveolata]	6.9e-152	Glutamate carboxypeptidase II	NA	carboxypeptidase activity	proteolysis	cell surface
Hsym|HyS0003.421	XP_002157738.1 PREDICTED: NADH dehydrogenase [ubiquinone] 1 alpha subcomplex subunit 5-like [Hydra vulgaris]	4.3e-29	NADH dehydrogenase 1 alpha subcomplex subunit 5	NDUFA5	NADH dehydrogenase activity	respiratory electron transport chain	mitochondrial respiratory chain complex I
Hsym|HyS0003.422	XP_012557616.1 PREDICTED: D-amino-acid oxidase-like [Hydra vulgaris]	2.3e-70	FAD dependent oxidoreductase	NA	D-amino-acid oxidase activity	D-amino acid metabolic process	peroxisome
Hsym|HyS0003.423	KXJ10880.1 Multidrug resistance-associated protein 7 [Exaiptasia pallida]	0	Multidrug resistance-associated protein 7	ABCC10	ATPase-coupled transmembrane transporter activity	transmembrane transport	integral component of membrane
Hsym|HyS0003.424	XP_027058150.1 disheveled-associated activator of morphogenesis 2-like [Pocillopora damicornis]	1.6e-269	Dishevelled associated activator of morphogenesis	DAAM2	Rho GTPase binding	actin cytoskeleton organization	actin filament
Hsym|HyS0003.425	XP_001632214.1 predicted protein [Nematostella vectensis]	4.7e-72	Sodium-dependent noradrenaline transporter	NA	neurotransmitter:sodium symporter activity	neurotransmitter transport	integral component of membrane
Hsym|HyS0003.426	XP_012565528.1 PREDICTED: meiotic recombination protein SPO11-like [Hydra vulgaris]	6.3e-107	SPO11 initiator of meiotic double stranded breaks	SPO11	endodeoxyribonuclease activity, producing 3'-phosphomonoesters	DNA catabolic process, endonucleolytic	chromosome
Hsym|HyS0003.428	XP_028405340.1 TNF receptor-associated factor 3-like [Dendronephthya gigantea]	5.2e-30	TNF receptor-associated factor 6	NA	tumor necrosis factor receptor binding	protein ubiquitination	NA
Hsym|HyS0003.429	XP_012553969.1 PREDICTED: AP-5 complex subunit mu-1-like isoform X1 [Hydra vulgaris]	1.4e-96	MHD domain-containing death-inducing protein (Fragment)	NA	NA	NA	NA
Hsym|HyS0003.430	XP_011427944.1 PREDICTED: uncharacterized protein LOC105328670 isoform X1 [Crassostrea gigas]	1.3e-104	Dihydroorotase	NA	deacetylase activity	NA	NA
Hsym|HyS0003.432	XP_012553969.1 PREDICTED: AP-5 complex subunit mu-1-like isoform X1 [Hydra vulgaris]	0.00085	NA	NA	NA	NA	NA
Hsym|HyS0003.433	XP_002170398.2 PREDICTED: poly(ADP-ribose) glycohydrolase ARH3-like [Hydra vulgaris]	4.1e-81	Adp ribosylglycohydrolase posttranslational modification	ADPRHL2	ADP-ribosylserine hydrolase activity	peptidyl-serine ADP-deribosylation	site of DNA damage
Hsym|HyS0003.434	XP_013400818.1 uncharacterized protein LOC106166720 [Lingula anatina]	2.8e-160	Dipeptidyl aminopeptidase acylaminoacyl peptidase	NA	serine-type peptidase activity	proteolysis	NA
Hsym|HyS0003.435	XP_012560847.1 PREDICTED: mitochondrial import inner membrane translocase subunit TIM50-like [Hydra vulgaris]	3.4e-96	Mitochondrial import inner membrane translocase subunit TIM50	NA	phosphoprotein phosphatase activity	protein transport	TIM23 mitochondrial import inner membrane translocase complex
Hsym|HyS0003.436	XP_012554696.1 PREDICTED: sacsin-like [Hydra vulgaris]	0	Histidine kinase-like ATPase, C-terminal domain containing protein	NA	kinase activity	phosphorylation	plasmodesma
Hsym|HyS0003.437	XP_022802853.1 uncharacterized protein LOC111340296 [Stylophora pistillata]	2.8e-07	NA	NA	NA	NA	NA
Hsym|HyS0003.438	XP_028412083.1 microfibril-associated glycoprotein 4-like [Dendronephthya gigantea]	1.8e-11	Fibrinogen C-terminal domain-containing protein (Fragment)	NA	scavenger receptor activity	endocytosis	membrane
Hsym|HyS0003.439	XP_012554696.1 PREDICTED: sacsin-like [Hydra vulgaris]	0	Sacsin molecular chaperone	SACS	Hsp70 protein binding	negative regulation of inclusion body assembly	mitochondrion
Hsym|HyS0003.440	KFM74967.1 putative alpha-ketoglutarate-dependent dioxygenase ABH6, partial [Stegodyphus mimosarum]	3.3e-59	Calcium dependent cysteine protease	NA	dioxygenase activity	oxidation-reduction process	focal adhesion
Hsym|HyS0003.441	XP_020904219.1 coiled-coil domain-containing protein 153-like [Exaiptasia pallida]	1.1e-19	Coiled-coil domain-containing protein 153	NA	NA	vesicle-mediated transport	membrane
Hsym|HyS0003.442	RDD44482.1 Coiled-coil domain-containing protein 153 [Trichoplax sp. H2]	9.2e-27	Coiled-coil domain-containing protein 153	NA	NA	NA	NA
Hsym|HyS0003.443	RDD44482.1 Coiled-coil domain-containing protein 153 [Trichoplax sp. H2]	5.4e-27	Coiled-coil domain-containing protein 153	NA	NA	NA	NA
Hsym|HyS0003.444	XP_028409633.1 uncharacterized protein LOC114532347 [Dendronephthya gigantea]	4.5e-32	Selenoprotein L	NA	NA	oxidation-reduction process	NA
Hsym|HyS0003.445	XP_012564930.1 PREDICTED: E3 ubiquitin-protein ligase TRIM9-like [Hydra vulgaris]	4.8e-192	Tripartite motif containing 9	TRIM67	zinc ion binding	positive regulation of ubiquitin-dependent protein catabolic process	neuron projection
Hsym|HyS0003.446	XP_002156618.2 PREDICTED: DNA helicase MCM8 [Hydra vulgaris]	2.8e-295	Dna replication licensing factor	MCM8	DNA binding	DNA replication initiation	MCM8-MCM9 complex
Hsym|HyS0003.447	XP_012558034.1 PREDICTED: methylglutaconyl-CoA hydratase, mitochondrial-like [Hydra vulgaris]	7.1e-103	Methylglutaconyl-CoA hydratase	NA	enoyl-CoA hydratase activity	fatty acid beta-oxidation	mitochondrion
Hsym|HyS0003.448	XP_015778795.1 PREDICTED: uncharacterized protein LOC107356686 [Acropora digitifera]	1.5e-16	NA	NA	NA	NA	NA
Hsym|HyS0003.449	XP_012559770.1 PREDICTED: fucose-1-phosphate guanylyltransferase-like [Hydra vulgaris]	8.5e-161	Fucose-1-phosphate guanylyltransferase	FPGT	transferase activity, transferring phosphorus-containing groups	fucose metabolic process	cytosol
Hsym|HyS0003.450	XP_012554679.1 PREDICTED: uncharacterized protein LOC105843613 [Hydra vulgaris]	3.8e-24	NA	NA	NA	NA	NA
Hsym|HyS0003.451	XP_002161957.1 PREDICTED: ubiquitin thioesterase OTUB1-like [Hydra vulgaris]	2.2e-100	Ubiquitin thioesterase	NA	thiol-dependent ubiquitin-specific protease activity	protein deubiquitination	nucleus
Hsym|HyS0003.452	ELU17196.1 hypothetical protein CAPTEDRAFT_210483 [Capitella teleta]	1.5e-10	NA	NA	NA	NA	NA
Hsym|HyS0003.453	XP_002161470.1 PREDICTED: glutathione-specific gamma-glutamylcyclotransferase 1-like [Hydra vulgaris]	8.6e-20	Glutathione-specific gamma-glutamylcyclotransferase 2	CHAC2	glutathione specific gamma-glutamylcyclotransferase activity	glutathione catabolic process	cytoplasm
Hsym|HyS0003.454	XP_012565081.1 PREDICTED: uncharacterized protein LOC101241542 [Hydra vulgaris]	1.1e-43	NAD dependent epimerase/dehydratase	NA	transferase activity	NA	integral component of membrane
Hsym|HyS0003.455	XP_012565081.1 PREDICTED: uncharacterized protein LOC101241542 [Hydra vulgaris]	3.1e-43	Nad dependent epimerase dehydratase	NA	transferase activity	NA	integral component of membrane
Hsym|HyS0003.459	XP_002154050.1 PREDICTED: ribose-phosphate pyrophosphokinase 4-like [Hydra vulgaris]	4.9e-115	Phosphoribosyl pyrophosphate synthetase	NA	ribose phosphate diphosphokinase activity	nucleoside metabolic process	ribose phosphate diphosphokinase complex
Hsym|HyS0003.460	XP_012555112.1 PREDICTED: non-specific lipid-transfer protein-like [Hydra vulgaris]	3.2e-170	Acetyl-CoA acetyltransferase	SCP2	transferase activity, transferring acyl groups other than amino-acyl groups	lipid hydroperoxide transport	peroxisome
Hsym|HyS0003.461	XP_012555784.1 PREDICTED: NACHT, LRR and PYD domains-containing protein 4B-like, partial [Hydra vulgaris]	4.8e-27	NA	NA	NA	NA	NA
Hsym|HyS0003.462	XP_001634809.1 predicted protein [Nematostella vectensis]	4.9e-42	NA	NA	NA	NA	NA
Hsym|HyS0003.463	XP_001632220.1 predicted protein [Nematostella vectensis]	2e-80	Maleylacetoacetate isomerase	GSTZ1	isomerase activity	aromatic amino acid family metabolic process	cytoplasm
Hsym|HyS0003.464	XP_027058166.1 kinesin-like protein KIF6 [Pocillopora damicornis]	7.8e-237	Kinesin motor domain-containing protein	NA	microtubule motor activity	microtubule-based movement	microtubule
Hsym|HyS0003.465	XP_020601745.1 uncharacterized protein LOC110040813 isoform X1 [Orbicella faveolata]	2.8e-38	NA	NA	NA	NA	NA
Hsym|HyS0003.466	XP_012558366.1 PREDICTED: protein asteroid-like, partial [Hydra vulgaris]	2.6e-58	NA	NA	NA	NA	NA
Hsym|HyS0003.467	XP_002157098.3 PREDICTED: N-acetyl-D-glucosamine kinase-like [Hydra vulgaris]	1.2e-122	N-acetyl-D-glucosamine kinase	NAGK	N-acetylglucosamine kinase activity	carbohydrate phosphorylation	NA
Hsym|HyS0003.468	XP_012560324.1 PREDICTED: uncharacterized protein LOC105846292 [Hydra vulgaris]	7.3e-13	NA	NA	NA	NA	NA
Hsym|HyS0003.469	XP_002165407.1 PREDICTED: ER membrane protein complex subunit 10-like [Hydra vulgaris]	1.2e-46	ER membrane protein complex subunit 10	EMC10	NA	NA	ER membrane protein complex
Hsym|HyS0003.470	XP_019200613.1 tubulin alpha chain [Oreochromis niloticus]	2.5e-245	Tubulin alpha chain	NA	structural constituent of cytoskeleton	microtubule-based process	microtubule
Hsym|HyS0003.471	XP_012561201.1 PREDICTED: uncharacterized protein LOC101240955, partial [Hydra vulgaris]	2.4e-141	NA	NA	NA	NA	NA
Hsym|HyS0003.472	XP_012555057.1 PREDICTED: uncharacterized protein LOC101241039, partial [Hydra vulgaris]	8.5e-201	Rab-GAP TBC domain-containing protein (Fragment)	NA	Rab GTPase binding	activation of GTPase activity	early endosome
Hsym|HyS0003.474	XP_002168936.3 PREDICTED: lysine histidine transporter-like 3 [Hydra vulgaris]	2.6e-138	Proton-coupled amino acid transporter 4	LOC100185142	amino acid transmembrane transporter activity	amino acid transmembrane transport	integral component of membrane
Hsym|HyS0003.475	XP_002161387.2 PREDICTED: sodium-dependent neutral amino acid transporter B(0)AT2-like [Hydra vulgaris]	3.6e-202	Transporter	NA	neurotransmitter:sodium symporter activity	neurotransmitter transport	integral component of membrane
Hsym|HyS0003.476	XP_012555847.1 PREDICTED: uncharacterized protein LOC100207375 [Hydra vulgaris]	0	Serine/threonine-protein kinase Nek8 (inferred by orthology to a human protein)	NA	protein kinase activity	protein phosphorylation	centrosome
Hsym|HyS0003.477	XP_002161665.1 PREDICTED: BTB/POZ domain-containing protein 9 [Hydra vulgaris]	2.8e-215	Btb poz domain-containing protein 9	BTBD9	NA	circadian sleep/wake cycle, non-REM sleep	NA
Hsym|HyS0003.478	XP_002161698.1 PREDICTED: uncharacterized protein LOC100200040 isoform X1 [Hydra vulgaris]	1e-36	NA	NA	NA	NA	NA
Hsym|HyS0003.479	XP_012555676.1 PREDICTED: putative deoxyribonuclease TATDN3 [Hydra vulgaris]	1.3e-64	TatD DNase domain containing 3	TATDN3	hydrolase activity, acting on ester bonds	DNA metabolic process	NA
Hsym|HyS0003.480	XP_002165160.2 PREDICTED: uncharacterized protein LOC100205069 [Hydra vulgaris]	2.2e-49	NA	NA	NA	NA	NA
Hsym|HyS0003.481	XP_002159721.2 PREDICTED: zinc finger protein 36, C3H1 type-like 2-B [Hydra vulgaris]	1.9e-78	Butyrate response factor 1	ZFP36L2	metal ion binding	cellular response to granulocyte macrophage colony-stimulating factor stimulus	nucleus
Hsym|HyS0003.482	XP_020909235.1 DNA repair protein RAD51 homolog 2-like [Exaiptasia pallida]	1.1e-60	DNA repair protein RAD51 homolog 2	RAD51B	DNA-dependent ATPase activity	double-strand break repair via homologous recombination	Rad51B-Rad51C-Rad51D-XRCC2 complex
Hsym|HyS0003.483	XP_002160621.1 PREDICTED: activator of 90 kDa heat shock protein ATPase homolog 1-like [Hydra vulgaris]	1.7e-124	Activator of heat shock protein ATPase 1	AHSA1	Hsp90 protein binding	positive regulation of ATPase activity	cytosol
Hsym|HyS0003.484	XP_002157795.2 PREDICTED: zinc phosphodiesterase ELAC protein 1-like [Hydra vulgaris]	2.2e-115	Zinc phosphodiesterase ELAC protein 1	ELAC1	endoribonuclease activity, producing 5'-phosphomonoesters	tRNA 3'-trailer cleavage	nucleus
Hsym|HyS0003.485	XP_002164663.1 PREDICTED: 39S ribosomal protein L11, mitochondrial-like [Hydra vulgaris]	4e-52	Mitochondrial ribosomal protein L11	MRPL11	structural constituent of ribosome	translation	mitochondrial large ribosomal subunit
Hsym|HyS0003.486	XP_002165630.2 PREDICTED: caspase-3-like [Hydra vulgaris]	7.2e-64	CARD-caspase	NA	cysteine-type endopeptidase activity	proteolysis	cytoplasm
Hsym|HyS0003.487	XP_002164527.2 PREDICTED: RNA-editing ligase 2, mitochondrial-like [Hydra vulgaris]	2.6e-72	RNA ligase, phage-associated	NA	ligase activity	NA	NA
Hsym|HyS0003.488	KXJ24738.1 Mitochondrial genome maintenance exonuclease 1 [Exaiptasia pallida]	4.4e-19	NA	NA	NA	NA	NA
Hsym|HyS0003.489	XP_012557842.1 PREDICTED: protein phosphatase 1 regulatory subunit 37-like [Hydra vulgaris]	3.5e-114	Leucine-rich repeat-containing protein 68	PPP1R37	protein phosphatase inhibitor activity	negative regulation of phosphatase activity	NA
Hsym|HyS0003.490	XP_012560350.1 PREDICTED: uncharacterized protein LOC105846302 [Hydra vulgaris]	2.4e-156	NA	NA	NA	NA	NA
Hsym|HyS0003.491	XP_002164769.1 PREDICTED: ribonuclease Oy-like [Hydra vulgaris]	6e-63	PolyU-preferential ribonuclease CL1	RNASET2	ribonuclease T2 activity	RNA phosphodiester bond hydrolysis, endonucleolytic	extracellular region
Hsym|HyS0003.492	XP_002161858.3 PREDICTED: son of sevenless homolog 2 [Hydra vulgaris]	0	SOS Ras/Rac guanine nucleotide exchange factor 1	SOS1	Rho guanyl-nucleotide exchange factor activity	regulation of Rho protein signal transduction	nucleosome
Hsym|HyS0003.493	XP_015760032.1 PREDICTED: uncharacterized protein LOC107339283 isoform X1 [Acropora digitifera]	9.5e-17	NA	NA	NA	NA	NA
Hsym|HyS0003.494	XP_004205892.1 PREDICTED: alpha-soluble NSF attachment protein-like [Hydra vulgaris]	1.3e-109	N-ethylmaleimide sensitive fusion protein attachment protein alpha	NAPA	syntaxin binding	intracellular protein transport	synaptobrevin 2-SNAP-25-syntaxin-1a complex
Hsym|HyS0003.495	XP_002165275.2 PREDICTED: N-alpha-acetyltransferase 40-like [Hydra vulgaris]	3.1e-71	Polypeptide N-acetylgalactosaminyltransferase	NAA40	H2A histone acetyltransferase activity	histone H2A acetylation	Golgi membrane
Hsym|HyS0003.496	XP_020309914.1 zinc finger protein 845-like isoform X1 [Oncorhynchus kisutch]	5.3e-27	PR domain zinc finger protein 1	NA	nucleic acid binding	regulation of transcription, DNA-templated	nucleus
Hsym|HyS0003.497	XP_002166015.2 PREDICTED: pleckstrin homology domain-containing family B member 2-like [Hydra vulgaris]	2.1e-40	WW domain-containing protein	NA	calcium ion binding	NA	integral component of membrane
Hsym|HyS0003.498	XP_012560701.1 PREDICTED: uncharacterized protein LOC105846465 [Hydra vulgaris]	2.6e-05	Coagulation factor XIIa	NA	calcium ion binding	Notch signaling pathway	integral component of membrane
Hsym|HyS0003.500	XP_012560124.1 PREDICTED: uncharacterized protein LOC105846192 [Hydra vulgaris]	5.5e-49	NA	NA	NA	NA	NA
Hsym|HyS0003.501	XP_028391361.1 metabotropic glutamate receptor 3-like [Dendronephthya gigantea]	3.9e-15	NA	NA	NA	NA	NA
Hsym|HyS0003.503	XP_012554702.1 PREDICTED: RNA polymerase-associated protein RTF1 homolog [Hydra vulgaris]	4.1e-127	RNA polymerase-associated protein Rtf1	RTF1	DNA binding	embryo development	Cdc73/Paf1 complex
Hsym|HyS0003.504	XP_012554706.1 PREDICTED: potassium voltage-gated channel subfamily H member 1-like isoform X2 [Hydra vulgaris]	3.3e-148	Potassium voltage-gated channel subfamily H member 8	KCNH8	voltage-gated potassium channel activity	potassium ion transmembrane transport	integral component of plasma membrane
Hsym|HyS0003.505	KXJ08164.1 UPF0764 protein C16orf89 [Exaiptasia pallida]	2e-29	NA	NA	NA	NA	NA
Hsym|HyS0003.506	XP_012562504.1 PREDICTED: interaptin-like, partial [Hydra vulgaris]	4.9e-24	NA	NA	NA	NA	NA
Hsym|HyS0003.507	XP_001640547.1 predicted protein [Nematostella vectensis]	0	Pyruvate carboxylase, mitochondrial	PC	biotin binding	gluconeogenesis	mitochondrion
Hsym|HyS0003.508	XP_002153777.2 PREDICTED: TNF receptor-associated factor 3-like [Hydra vulgaris]	4.4e-67	NA	NA	NA	NA	NA
Hsym|HyS0003.509	WP_071662003.1 hypothetical protein [Candidatus Rickettsiella isopodorum]	3.8e-26	NA	NA	NA	NA	NA
Hsym|HyS0003.510	XP_027058151.1 RNA helicase aquarius-like [Pocillopora damicornis]	0	Aquarius intron-binding spliceosomal factor	AQR	RNA binding	mRNA splicing, via spliceosome	spliceosomal complex
Hsym|HyS0003.511	XP_012564719.1 PREDICTED: two pore calcium channel protein 2-like [Hydra vulgaris]	2e-253	General transcription factor IIH subunit 4	NA	ion channel activity	ion transmembrane transport	integral component of membrane
Hsym|HyS0003.512	XP_002169593.3 PREDICTED: phosphatidylinositol 4-phosphate 5-kinase type-1 beta-like [Hydra vulgaris]	1.9e-192	Phosphatidylinositol-4-phosphate 5-kinase type-1 gamma	PIP5K1B	phosphatidylinositol phosphate kinase activity	phosphatidylinositol phosphorylation	uropod
Hsym|HyS0003.513	XP_004208356.1 PREDICTED: molybdopterin biosynthesis protein CNX1-like isoform X1 [Hydra vulgaris]	6e-278	Molybdopterin molybdenumtransferase	GPHN	molybdopterin adenylyltransferase activity	molybdopterin cofactor biosynthetic process	dendrite
Hsym|HyS0003.514	XP_022805365.1 zinc transporter ZIP9-like [Stylophora pistillata]	2.7e-84	Polypeptide N-acetylgalactosaminyltransferase	SLC39A9	metal ion transmembrane transporter activity	metal ion transport	integral component of membrane
Hsym|HyS0003.515	XP_002159160.3 PREDICTED: zinc finger protein-like 1 homolog [Hydra vulgaris]	6.6e-94	Zinc finger protein like 1	NA	ligase activity	dsRNA transport	integral component of membrane
Hsym|HyS0003.516	XP_027057840.1 uncharacterized protein LOC113684647, partial [Pocillopora damicornis]	1.2e-08	NA	NA	NA	NA	NA
Hsym|HyS0003.518	XP_027049931.1 TNF receptor-associated factor 6-like [Pocillopora damicornis]	4.2e-27	NA	NA	NA	NA	NA
Hsym|HyS0003.519	RMX51442.1 hypothetical protein pdam_00023579 [Pocillopora damicornis]	1.5e-36	NA	NA	NA	NA	NA
Hsym|HyS0003.520	XP_012556668.1 PREDICTED: DNA-directed RNA polymerase III subunit RPC7-like [Hydra vulgaris]	1e-31	DNA-directed RNA polymerase III subunit	NA	DNA-directed 5'-3' RNA polymerase activity	transcription by RNA polymerase III	RNA polymerase III complex
Hsym|HyS0003.521	XP_002157613.2 PREDICTED: dihydrolipoyllysine-residue succinyltransferase component of 2-oxoglutarate dehydrogenase complex, mitochondrial-like [Hydra vulgaris]	2.5e-146	Dihydrolipoyllysine-residue succinyltransferase component of 2-oxoglutarate dehydrogenase complex	DLST	dihydrolipoyllysine-residue succinyltransferase activity	tricarboxylic acid cycle	oxoglutarate dehydrogenase complex
Hsym|HyS0003.522	XP_002155651.2 PREDICTED: sprT-like domain-containing protein Spartan [Hydra vulgaris]	2.2e-99	Ganglioside-induced differentiation-associated protein 1-like 1	SPRTN	K63-linked polyubiquitin modification-dependent protein binding	cellular response to DNA damage stimulus	nuclear speck
Hsym|HyS0003.524	KXJ18058.1 hypothetical protein AC249_AIPGENE21480 [Exaiptasia pallida]	2.3e-12	NA	NA	NA	NA	NA
Hsym|HyS0003.525	KXJ18058.1 hypothetical protein AC249_AIPGENE21480 [Exaiptasia pallida]	3e-12	NA	NA	NA	NA	NA
Hsym|HyS0003.526	XP_028396087.1 papilin-like [Dendronephthya gigantea]	8.7e-152	A disintegrin and metalloproteinase with thrombospondin motifs 6	PAPLN	serine-type endopeptidase inhibitor activity	integrin-mediated signaling pathway	extracellular region
Hsym|HyS0003.527	XP_028405381.1 uncharacterized protein LOC114527873 [Dendronephthya gigantea]	3.8e-05	NA	NA	NA	NA	NA
Hsym|HyS0003.528	XP_002163707.3 PREDICTED: CUB and sushi domain-containing protein 3-like [Hydra vulgaris]	1.3e-43	NA	NA	NA	NA	NA
Hsym|HyS0003.529	XP_012556372.1 PREDICTED: splicing factor 3A subunit 3-like [Hydra vulgaris]	6.5e-210	Matrin-type domain-containing protein (Fragment)	SF3A3	zinc ion binding	mRNA splicing, via spliceosome	spliceosomal complex
Hsym|HyS0003.530	XP_003972615.2 PREDICTED: fibroblast growth factor 8b-like isoform X1 [Takifugu rubripes]	7.5e-13	NA	NA	NA	NA	NA
Hsym|HyS0003.531	AOZ60364.1 alpha-crystallin-type HSP [Hydra vulgaris]	1.2e-61	Alpha-crystallin-type HSP	NA	NA	NA	NA
Hsym|HyS0003.532	XP_015762335.1 PREDICTED: 3-hydroxyanthranilate 3,4-dioxygenase-like [Acropora digitifera]	4.2e-05	NA	NA	NA	NA	NA
Hsym|HyS0003.533	XP_002167137.1 PREDICTED: heat shock protein homolog [Hydra vulgaris]	3.9e-16	NA	NA	NA	NA	NA
Hsym|HyS0003.534	XP_002161304.2 PREDICTED: 3-hydroxyanthranilate 3,4-dioxygenase-like [Hydra vulgaris]	2.1e-80	3-hydroxyanthranilate 3,4-dioxygenase	HAAO	3-hydroxyanthranilate 3,4-dioxygenase activity	'de novo' NAD biosynthetic process from tryptophan	cytoplasm
Hsym|HyS0003.535	XP_002153809.2 PREDICTED: 39S ribosomal protein L47, mitochondrial-like [Hydra vulgaris]	1.4e-38	Mitochondrial ribosomal protein L47	MRPL47	structural constituent of ribosome	translation	mitochondrial ribosome
Hsym|HyS0003.536	XP_002157708.2 PREDICTED: uridine diphosphate glucose pyrophosphatase-like [Hydra vulgaris]	9.8e-58	Uridine diphosphate glucose pyrophosphatase	NA	hydrolase activity, acting on acid anhydrides, in phosphorus-containing anhydrides	ribose phosphate metabolic process	integral component of membrane
Hsym|HyS0003.539	XP_019629641.1 PREDICTED: proline-rich protein 5-like isoform X1 [Branchiostoma belcheri]	1.1e-44	proline-rich protein 5	NA	NA	NA	NA
Hsym|HyS0003.549	XP_002163191.1 PREDICTED: alpha-latrocrustotoxin-Lt1a-like [Hydra vulgaris]	2.9e-36	NF-kappa-B inhibitor protein	NA	NA	NA	NA
Hsym|HyS0003.550	XP_002165745.2 PREDICTED: 2-oxoisovalerate dehydrogenase subunit alpha, mitochondrial-like [Hydra vulgaris]	1.5e-173	2-oxoisovalerate dehydrogenase subunit alpha	NA	alpha-ketoacid dehydrogenase activity	branched-chain amino acid catabolic process	mitochondrial alpha-ketoglutarate dehydrogenase complex
Hsym|HyS0003.551	XP_002156672.3 PREDICTED: GTP-binding protein 2-like [Hydra vulgaris]	8e-193	GTP-binding protein 2	GTPBP2	GTPase activity	translational elongation	intracellular membrane-bounded organelle
Hsym|HyS0003.554	XP_020901275.1 uncharacterized protein LOC110239862 [Exaiptasia pallida]	1e-44	NA	NA	NA	NA	NA
Hsym|HyS0003.555	XP_028408759.1 uncharacterized protein LOC114531322 [Dendronephthya gigantea]	7.9e-45	NA	NA	NA	NA	NA
Hsym|HyS0003.556	XP_020616192.1 beta-1,3-galactosyltransferase 5-like [Orbicella faveolata]	8.2e-23	NA	NA	NA	NA	NA
Hsym|HyS0003.557	XP_002157327.2 PREDICTED: ras-related protein Rab-27A-like [Hydra vulgaris]	2.6e-93	RAB27A, member RAS oncogene family	NA	GTPase activity	positive regulation of exocytosis	melanosome
Hsym|HyS0003.558	OQV16091.1 hypothetical protein BV898_09727 [Hypsibius dujardini]	4e-41	NA	NA	NA	NA	NA
Hsym|HyS0003.559	XP_004208443.2 PREDICTED: uncharacterized protein LOC100210082 [Hydra vulgaris]	4.8e-182	NA	NA	NA	NA	NA
Hsym|HyS0003.560	XP_012553561.1 PREDICTED: RING finger protein 157-like [Hydra vulgaris]	2.2e-41	NA	NA	NA	NA	NA
Hsym|HyS0003.562	XP_012554732.1 PREDICTED: NF-kappa-B-repressing factor-like [Hydra vulgaris]	2.7e-104	ATP-dependent DNA helicase (Fragment)	NA	DNA helicase activity	telomere maintenance	NA
Hsym|HyS0003.563	ELU03494.1 hypothetical protein CAPTEDRAFT_151997 [Capitella teleta]	1.2e-90	Mitochondrial arginase-2	ARG2	arginase activity	urea cycle	mitochondrion
Hsym|HyS0003.564	XP_004209199.1 PREDICTED: enhancer of rudimentary homolog [Hydra vulgaris]	3e-45	Enhancer of rudimentary	NA	NA	cell cycle	NA
Hsym|HyS0003.565	XP_012563559.1 PREDICTED: signaling mucin HKR1-like isoform X1 [Hydra vulgaris]	0.00069	NA	NA	NA	NA	NA
Hsym|HyS0003.566	AOF43148.1 histone H2B.3 [Hydractinia echinata]	2.7e-40	Glycerate kinase	NA	protein heterodimerization activity	nucleosome assembly	nucleosome
Hsym|HyS0003.567	XP_004207988.1 PREDICTED: forkhead box protein I1c-like [Hydra vulgaris]	1.2e-39	Forkhead box protein L	NA	sequence-specific DNA binding	regulation of transcription, DNA-templated	nucleus
Hsym|HyS0003.568	XP_027057765.1 uncharacterized protein LOC113684566 [Pocillopora damicornis]	2e-16	NA	NA	NA	NA	NA
Hsym|HyS0003.569	XP_018086620.1 PREDICTED: insulinoma-associated protein 2-like [Xenopus laevis]	1.9e-28	INSM transcriptional repressor 2	INSM2	nucleic acid binding	NA	NA
Hsym|HyS0003.570	XP_012565169.1 PREDICTED: WD repeat-containing protein 25-like [Hydra vulgaris]	1.8e-79	WD repeat-containing protein 25	NA	NA	NA	NA
Hsym|HyS0003.571	XP_002157895.1 PREDICTED: transcription initiation factor TFIID subunit 13-like [Hydra vulgaris]	9.2e-46	Transcription initiation factor TFIID subunit	TAF13	protein heterodimerization activity	transcription by RNA polymerase II	transcription factor TFIID complex
Hsym|HyS0003.572	XP_004205934.1 PREDICTED: uncharacterized protein LOC101234795 [Hydra vulgaris]	7.5e-50	Mitochondrial dynamics protein MID51	NA	NA	NA	NA
Hsym|HyS0003.574	XP_022795541.1 nuclear nucleic acid-binding protein C1D-like isoform X1 [Stylophora pistillata]	7.5e-30	Putative sun-cor steroid hormone receptor co-repressor	C1D	nuclear receptor binding	maturation of 5.8S rRNA	transcriptional repressor complex
Hsym|HyS0003.575	ROT79987.1 hypothetical protein C7M84_001258 [Penaeus vannamei]	1.7e-66	Ubiquitin-domain-containing protein (Fragment)	NA	structural constituent of ribosome	translation	ribosome
Hsym|HyS0003.576	XP_002154763.1 PREDICTED: proto-oncogene c-Fos-like isoform X1 [Hydra vulgaris]	4.4e-18	Transforming protein v-Fos/v-Fox	NA	DNA-binding transcription factor activity	regulation of transcription by RNA polymerase II	nucleus
Hsym|HyS0003.577	XP_012557595.1 PREDICTED: ATP-binding cassette sub-family B member 10, mitochondrial-like [Hydra vulgaris]	1.1e-147	ABC transporter transmembrane region	NA	ATPase-coupled transmembrane transporter activity	transmembrane transport	integral component of membrane
Hsym|HyS0004.1	XP_012556472.1 PREDICTED: uncharacterized protein LOC105844411 [Hydra vulgaris]	4.6e-14	NA	NA	NA	NA	NA
Hsym|HyS0004.2	XP_012566616.1 PREDICTED: THAP domain-containing protein 4-like, partial [Hydra vulgaris]	5.1e-17	Cyclin-dependent kinase 2 associated protein 2	NA	DNA binding	phosphorylation	NA
Hsym|HyS0004.3	XP_028410162.1 uncharacterized protein LOC114532775 [Dendronephthya gigantea]	2.5e-46	NA	NA	NA	NA	NA
Hsym|HyS0004.4	XP_012555681.1 PREDICTED: LOW QUALITY PROTEIN: elongator complex protein 2-like [Hydra vulgaris]	3e-246	Elongator acetyltransferase complex subunit 2	ELP2	RNA polymerase II complex binding	tRNA wobble uridine modification	Elongator holoenzyme complex
Hsym|HyS0004.5	XP_022803420.1 uncharacterized protein LOC111340786 isoform X1 [Stylophora pistillata]	3.4e-38	Reverse transcriptase domain-containing protein	NA	NA	NA	NA
Hsym|HyS0004.6	XP_015773463.1 PREDICTED: DDB1- and CUL4-associated factor 17-like [Acropora digitifera]	1.2e-08	NA	NA	NA	NA	NA
Hsym|HyS0004.7	PFX23604.1 hypothetical protein AWC38_SpisGene11834 [Stylophora pistillata]	1.7e-31	NA	NA	NA	NA	NA
Hsym|HyS0004.9	KXJ14539.1 hypothetical protein AC249_AIPGENE26756 [Exaiptasia pallida]	5.3e-78	NA	NA	NA	NA	NA
Hsym|HyS0004.10	XP_015752486.1 PREDICTED: uncharacterized protein LOC107332274 [Acropora digitifera]	6.2e-30	NA	NA	NA	NA	NA
Hsym|HyS0004.11	XP_027059017.1 major facilitator superfamily domain-containing protein 12-like isoform X1 [Pocillopora damicornis]	3.7e-63	Major facilitator superfamily domain-containing protein 12	MFSD12	symporter activity	carbohydrate transport	integral component of plasma membrane
Hsym|HyS0004.12	RMX34493.1 hypothetical protein pdam_00025752, partial [Pocillopora damicornis]	3.6e-12	NA	NA	NA	NA	NA
Hsym|HyS0004.13	XP_022795037.1 cilia- and flagella-associated protein 221-like [Stylophora pistillata]	7.9e-176	Primary ciliary dyskinesia protein 1	NA	NA	cilium movement	cilium
Hsym|HyS0004.14	XP_028390702.1 uncharacterized protein LOC114515612 [Dendronephthya gigantea]	5.5e-32	NA	NA	NA	NA	NA
Hsym|HyS0004.15	PFX23934.1 hypothetical protein AWC38_SpisGene11474 [Stylophora pistillata]	4.7e-17	NA	NA	NA	NA	NA
Hsym|HyS0004.16	XP_001638232.1 predicted protein [Nematostella vectensis]	7.2e-14	NA	NA	NA	NA	NA
Hsym|HyS0004.17	XP_002156870.3 PREDICTED: amyloid beta A4 precursor protein-binding family B member 1-interacting protein-like [Hydra vulgaris]	2.3e-146	Ras-associated and pleckstrin homology domains-containing protein 1	NA	NA	signal transduction	integral component of membrane
Hsym|HyS0004.18	XP_012558243.1 PREDICTED: heat shock factor protein 2-like [Hydra vulgaris]	1.7e-33	Heat shock transcription factor, Y-linked	NA	sequence-specific DNA binding	regulation of transcription, DNA-templated	nucleus
Hsym|HyS0004.19	XP_012557794.1 PREDICTED: caspase recruitment domain-containing protein 11-like [Hydra vulgaris]	7.3e-49	NA	NA	NA	NA	NA
Hsym|HyS0004.20	XP_015771900.1 PREDICTED: kinesin-like protein KIF28P [Acropora digitifera]	1.9e-283	Kinesin motor domain-containing protein (Fragment)	NA	microtubule motor activity	microtubule-based movement	microtubule
Hsym|HyS0004.21	XP_020895898.1 organic cation transporter-like protein [Exaiptasia pallida]	8.2e-39	MFS domain-containing protein	NA	transmembrane transporter activity	transmembrane transport	integral component of plasma membrane
Hsym|HyS0004.22	XP_012562359.1 PREDICTED: dnaJ homolog subfamily C member 22-like [Hydra vulgaris]	1.5e-117	J domain-containing protein (Fragment)	NA	NA	NA	integral component of membrane
Hsym|HyS0004.23	XP_012556209.1 PREDICTED: transcription factor CP2-like [Hydra vulgaris]	3.9e-165	Upstream-binding protein 1	NA	DNA-binding transcription factor activity	regulation of transcription by RNA polymerase II	nucleus
Hsym|HyS0004.25	XP_012559008.1 PREDICTED: tuftelin-interacting protein 11-like [Hydra vulgaris]	0	Tuftelin-interacting protein 11	TFIP11	nucleic acid binding	spliceosomal complex disassembly	spliceosomal complex
Hsym|HyS0004.26	XP_002162060.2 PREDICTED: programmed cell death 6-interacting protein-like [Hydra vulgaris]	2e-283	Alg-2-Interacting Protein X	PDCD6IP	SH3 domain binding	mitotic cytokinesis	Flemming body
Hsym|HyS0004.27	XP_002158536.2 PREDICTED: serine/threonine-protein kinase dst1-like [Hydra vulgaris]	2.5e-136	Myosin light chain kinase, smooth muscle	NA	protein kinase activity	protein phosphorylation	nucleus
Hsym|HyS0004.29	XP_022344445.1 uncharacterized protein KIAA1841-like isoform X4 [Crassostrea virginica]	1.1e-103	Small nuclear ribonucleoprotein G	NA	DNA binding	protein import into peroxisome matrix, docking	peroxisome
Hsym|HyS0004.30	OMJ08090.1 Ankyrin repeat protein nuc-2 [Smittium culicis]	0.0001	NA	NA	NA	NA	NA
Hsym|HyS0004.31	XP_002154515.2 PREDICTED: F-box/LRR-repeat protein 20-like [Hydra vulgaris]	5.9e-123	NA	NA	NA	NA	NA
Hsym|HyS0004.32	XP_012559163.1 PREDICTED: protein CLP1 homolog [Hydra vulgaris]	2.2e-195	Polyribonucleotide 5'-hydroxyl-kinase Clp1	CLP1	ATP-dependent polyribonucleotide 5'-hydroxyl-kinase activity	siRNA loading onto RISC involved in RNA interference	mRNA cleavage factor complex
Hsym|HyS0004.33	PIK55282.1 endonuclease-reverse transcriptase [Apostichopus japonicus]	4e-06	NA	NA	NA	NA	NA
Hsym|HyS0004.34	PAA53120.1 hypothetical protein BOX15_Mlig018526g3 [Macrostomum lignano]	7e-24	Cell number regulator 10	NA	NA	NA	integral component of membrane
Hsym|HyS0004.35	XP_002165833.1 PREDICTED: protein PLANT CADMIUM RESISTANCE 3-like [Hydra vulgaris]	1.6e-36	Placenta-specific protein 8-like	NA	G protein-coupled receptor activity	G protein-coupled receptor signaling pathway	integral component of membrane
Hsym|HyS0004.36	XP_002154235.2 PREDICTED: splicing factor 3A subunit 1-like [Hydra vulgaris]	2e-229	Splicing factor 3 subunit 1	SF3A1	RNA binding	RNA processing	U2-type prespliceosome
Hsym|HyS0004.37	XP_002154235.2 PREDICTED: splicing factor 3A subunit 1-like [Hydra vulgaris]	4.9e-104	Splicing factor 3 subunit 1	SF3A1	RNA binding	RNA processing	U2-type prespliceosome
Hsym|HyS0004.38	XP_015759403.1 PREDICTED: uncharacterized protein LOC107338686 [Acropora digitifera]	1.2e-34	NA	NA	NA	NA	NA
Hsym|HyS0004.39	XP_012567169.1 PREDICTED: TBC1 domain family member 5-like [Hydra vulgaris]	1e-61	Ypt/rab specific gtpase activating protein gyp6	TBC1D5	retromer complex binding	positive regulation of receptor internalization	Atg1/ULK1 kinase complex
Hsym|HyS0004.40	XP_012567169.1 PREDICTED: TBC1 domain family member 5-like [Hydra vulgaris]	6.1e-39	NA	NA	NA	NA	NA
Hsym|HyS0004.41	NP_001081442.1 zinc finger protein GLI4 [Xenopus laevis]	2.9e-33	Transcriptional activator cubitus interruptus	NA	nucleic acid binding	pituitary gland development	ciliary tip
Hsym|HyS0004.42	AEM62766.1 heat shock cognate protein 71 [Hydractinia echinata]	0	Heat shock 70 kDa protein cognate	HSPA8	C3HC4-type RING finger domain binding	protein targeting to lysosome involved in chaperone-mediated autophagy	extracellular exosome
Hsym|HyS0004.43	XP_002158724.1 PREDICTED: costars family protein ABRACL-like [Hydra vulgaris]	9.8e-31	ABRA C-terminal like	NA	NA	regulation of actin filament-based process	NA
Hsym|HyS0004.44	XP_020906743.1 PR domain zinc finger protein 12-like isoform X1 [Exaiptasia pallida]	2.7e-45	PR domain zinc finger protein 12	PRDM12	histone methyltransferase binding	positive regulation of histone H3-K9 dimethylation	nucleus
Hsym|HyS0004.45	XP_020916625.1 uncharacterized protein LOC110254009 [Exaiptasia pallida]	2.2e-14	Mitochondrial cytochrome c oxidase subunit VIa (Fragment)	NA	cytochrome-c oxidase activity	proton transmembrane transport	mitochondrial respiratory chain complex IV
Hsym|HyS0004.46	XP_012566146.1 PREDICTED: uncharacterized protein LOC105850205 [Hydra vulgaris]	1e-15	NA	NA	NA	NA	NA
Hsym|HyS0004.47	XP_002737170.1 PREDICTED: zinc transporter 6-A-like [Saccoglossus kowalevskii]	2.4e-77	Zinc transporter 6-A	SLC30A6	cation transmembrane transporter activity	cation transmembrane transport	integral component of membrane
Hsym|HyS0004.48	XP_002158959.3 PREDICTED: alkylated DNA repair protein alkB homolog 1-like [Hydra vulgaris]	1.4e-131	Alkylated DNA repair protein AlkB	NA	oxidoreductase activity	oxidation-reduction process	nuclear euchromatin
Hsym|HyS0004.49	XP_002170830.2 PREDICTED: hypoxanthine-guanine phosphoribosyltransferase-like [Hydra vulgaris]	4.8e-85	Hypoxanthine phosphoribosyltransferase	NA	hypoxanthine phosphoribosyltransferase activity	IMP salvage	cytoplasm
Hsym|HyS0004.50	XP_002170830.2 PREDICTED: hypoxanthine-guanine phosphoribosyltransferase-like [Hydra vulgaris]	2e-91	Hypoxanthine-guanine phosphoribosyltransferase	HPRT1	hypoxanthine phosphoribosyltransferase activity	IMP salvage	cytoplasm
Hsym|HyS0004.51	XP_012553579.1 PREDICTED: CCA tRNA nucleotidyltransferase 1, mitochondrial-like [Hydra vulgaris]	3.4e-130	Cca trna nucleotidyltransferase mitochondrial	TRNT1	ATP:3'-cytidine-cytidine-tRNA adenylyltransferase activity	mitochondrial tRNA 3'-end processing	mitochondrion
Hsym|HyS0004.52	XP_002164604.3 PREDICTED: transmembrane protein 194A-like [Hydra vulgaris]	9.9e-69	CCA tRNA nucleotidyltransferase 1,mitochondrial (Fragment)	NA	nucleotidyltransferase activity	RNA processing	integral component of membrane
Hsym|HyS0004.53	XP_012566986.1 PREDICTED: E3 ubiquitin-protein ligase HECW1-like [Hydra vulgaris]	0	HECT, C2 and WW domain containing E3 ubiquitin protein ligase 2a	NA	ubiquitin-protein transferase activity	protein ubiquitination	cytoplasm
Hsym|HyS0004.54	XP_002160602.2 PREDICTED: GTP-binding protein Rheb-like [Hydra vulgaris]	3.7e-78	GTP-binding protein Rheb	RHEB	GTPase activity	positive regulation of TOR signaling	membrane
Hsym|HyS0004.55	XP_002158942.2 PREDICTED: methylmalonyl-CoA mutase, mitochondrial-like [Hydra vulgaris]	0	Methylmalonyl Coenzyme A mutase	NA	methylmalonyl-CoA mutase activity	homocysteine metabolic process	mitochondrial matrix
Hsym|HyS0004.56	XP_020624591.1 type I iodothyronine deiodinase-like [Orbicella faveolata]	3.5e-09	NA	NA	NA	NA	NA
Hsym|HyS0004.57	XP_012560345.1 PREDICTED: NADH-ubiquinone oxidoreductase 75 kDa subunit, mitochondrial-like [Hydra vulgaris]	0	NADH-ubiquinone oxidoreductase 75 kDa subunit mitochondrial	NDUFS1	NADH dehydrogenase (ubiquinone) activity	ATP synthesis coupled electron transport	membrane
Hsym|HyS0004.58	XP_002158852.2 PREDICTED: methylmalonic aciduria and homocystinuria type C protein homolog [Hydra vulgaris]	7.3e-66	Methylmalonic aciduria and homocystinuria type C	MMACHC	cyanocobalamin reductase (cyanide-eliminating) activity	demethylation	cytoplasm
Hsym|HyS0004.59	XP_002158824.1 PREDICTED: probable cytosolic iron-sulfur protein assembly protein CIAO1 homolog [Hydra vulgaris]	4e-38	Probable cytosolic iron-sulfur protein assembly protein Ciao1	CIAO1	G protein-coupled receptor activity	iron-sulfur cluster assembly	CIA complex
Hsym|HyS0004.61	XP_002158782.2 PREDICTED: protein SERAC1-like [Hydra vulgaris]	3.7e-159	Serine active site containing 1	SERAC1	NA	phosphatidylglycerol acyl-chain remodeling	mitochondria-associated endoplasmic reticulum membrane
Hsym|HyS0004.62	XP_016131759.1 PREDICTED: homeobox protein Dlx1a-like [Sinocyclocheilus grahami]	3.1e-23	Transcription factor Dll	NA	sequence-specific DNA binding	regulation of transcription, DNA-templated	nucleus
Hsym|HyS0004.63	XP_004207683.1 PREDICTED: CDK5 regulatory subunit-associated protein 3-like [Hydra vulgaris]	2.4e-159	CDK5 regulatory subunit-associated protein 3	CDK5RAP3	MDM2/MDM4 family protein binding	negative regulation of protein kinase activity by regulation of protein phosphorylation	centrosome
Hsym|HyS0004.64	XP_002154684.1 PREDICTED: uncharacterized protein LOC100200063 [Hydra vulgaris]	9.7e-140	C-terminal tandem repeated domain in type 4 procollagen	NA	extracellular matrix structural constituent	aorta smooth muscle tissue morphogenesis	collagen trimer
Hsym|HyS0004.65	XP_020895038.1 uncharacterized protein LOC110234036 [Exaiptasia pallida]	1.4e-263	Leucine-rich repeat and WD repeat-containing	NA	catalytic activity	regulation of DNA-dependent DNA replication initiation	Rix1 complex
Hsym|HyS0004.66	XP_002159185.1 PREDICTED: sulfite oxidase-like [Hydra vulgaris]	3.1e-200	Sulfite oxidase, mitochondrial (inferred by orthology to a human protein)	SUOX	molybdenum ion binding	nitrate assimilation	mitochondrion
Hsym|HyS0004.67	XP_028416582.1 uncharacterized protein LOC114540659 [Dendronephthya gigantea]	8.3e-07	NA	NA	NA	NA	NA
Hsym|HyS0004.69	XP_012556534.1 PREDICTED: uncharacterized protein LOC100210120, partial [Hydra vulgaris]	3.3e-72	NA	NA	NA	NA	NA
Hsym|HyS0004.71	XP_027041498.1 uncharacterized protein LOC113669629 [Pocillopora damicornis]	2.1e-69	NA	NA	NA	NA	NA
Hsym|HyS0004.73	XP_012553838.1 PREDICTED: ras suppressor protein 1-like [Hydra vulgaris]	5.6e-14	Ras suppressor protein 1	RSU1	NA	positive regulation of cell-substrate adhesion	focal adhesion
Hsym|HyS0004.74	XP_012560823.1 PREDICTED: pituitary tumor-transforming gene 1 protein-interacting protein-like [Hydra vulgaris]	5.9e-14	Pituitary tumor-transforming gene 1 protein-interacting protein	NA	NA	protein import into nucleus	nucleus
Hsym|HyS0004.76	XP_004205990.2 PREDICTED: carbohydrate sulfotransferase 11-like [Hydra vulgaris]	1.8e-63	Carbohydrate sulfotransferase	NA	sulfotransferase activity	carbohydrate biosynthetic process	Golgi membrane
Hsym|HyS0004.77	XP_013074112.1 PREDICTED: latrophilin-3-like isoform X4 [Biomphalaria glabrata]	8.6e-36	GPS domain-containing protein (Fragment)	NA	G protein-coupled receptor activity	cell surface receptor signaling pathway	integral component of membrane
Hsym|HyS0004.78	XP_015766662.1 PREDICTED: fibrous sheath-interacting protein 2-like [Acropora digitifera]	1.7e-27	NA	NA	NA	NA	NA
Hsym|HyS0004.79	XP_004207483.1 PREDICTED: lysine histidine transporter-like 4 [Hydra vulgaris]	5.9e-159	NA	NA	NA	NA	NA
Hsym|HyS0004.80	XP_012525927.2 uncharacterized protein LOC105830844 [Monomorium pharaonis]	6.4e-23	Glutathione S-transferase 1	NA	transferase activity	NA	NA
Hsym|HyS0004.81	XP_012561761.1 PREDICTED: integrin beta-2-like [Hydra vulgaris]	1.6e-42	Integrin beta	NA	fibronectin binding	integrin-mediated signaling pathway	integrin complex
Hsym|HyS0004.82	XP_002155495.3 PREDICTED: beta-2 adrenergic receptor-like [Hydra vulgaris]	4.1e-107	Prostaglandin E2 receptor EP3 subtype (Fragment)	NA	G protein-coupled receptor activity	G protein-coupled receptor signaling pathway	integral component of membrane
Hsym|HyS0004.84	XP_002154262.1 PREDICTED: DIS3-like exonuclease 2 [Hydra vulgaris]	3.2e-282	RNB domain-containing protein (Fragment)	NA	3'-5'-exoribonuclease activity	nuclear-transcribed mRNA catabolic process, exonucleolytic, 3'-5'	P-body
Hsym|HyS0004.85	XP_012555318.1 PREDICTED: uncharacterized protein LOC105843905 [Hydra vulgaris]	5.6e-30	NA	NA	NA	NA	NA
Hsym|HyS0004.86	XP_022801821.1 uncharacterized protein LOC111339432 [Stylophora pistillata]	1.4e-94	NA	NA	NA	NA	NA
Hsym|HyS0004.87	XP_012561462.1 PREDICTED: probable G-protein coupled receptor 133 isoform X1 [Hydra vulgaris]	2e-42	NA	NA	NA	NA	NA
Hsym|HyS0004.89	XP_012553485.1 PREDICTED: uncharacterized protein LOC101237240 [Hydra vulgaris]	1.1e-58	NA	NA	NA	NA	NA
Hsym|HyS0004.90	XP_002155693.3 PREDICTED: tigger transposable element-derived protein 4-like [Hydra vulgaris]	1.4e-18	NA	NA	NA	NA	NA
Hsym|HyS0004.91	XP_012562602.1 PREDICTED: uncharacterized protein LOC105847528 [Hydra vulgaris]	4.9e-11	NA	NA	NA	NA	NA
Hsym|HyS0004.96	XP_026463310.1 dnaJ homolog subfamily B member 6-like [Ctenocephalides felis]	1.6e-39	Chaperone regulator	NA	chaperone binding	muscle attachment	nuclear envelope
Hsym|HyS0004.97	XP_012563177.1 PREDICTED: glycerol-3-phosphate dehydrogenase [NAD(+)], cytoplasmic-like [Hydra vulgaris]	5.2e-134	NAD-dependent glycerol-3-phosphate dehydrogenase C-terminus-domain-containing protein	NA	glycerol-3-phosphate dehydrogenase [NAD+] activity	glycerol-3-phosphate catabolic process	glycerol-3-phosphate dehydrogenase complex
Hsym|HyS0004.100	XP_012563177.1 PREDICTED: glycerol-3-phosphate dehydrogenase [NAD(+)], cytoplasmic-like [Hydra vulgaris]	1.8e-63	NAD-dependent glycerol-3-phosphate dehydrogenase	NA	glycerol-3-phosphate dehydrogenase [NAD+] activity	glycerol-3-phosphate catabolic process	glycerol-3-phosphate dehydrogenase complex
Hsym|HyS0004.103	RMX41747.1 hypothetical protein pdam_00005574 [Pocillopora damicornis]	6.5e-32	Golgin subfamily A member 4 (Fragment)	NA	NA	NA	NA
Hsym|HyS0004.104	XP_020909105.1 FYVE and coiled-coil domain-containing protein 1-like [Exaiptasia pallida]	1.3e-65	FYVE and coiled-coil domain-containing protein 1 (Fragment)	NA	metal ion binding	NA	NA
Hsym|HyS0004.105	XP_002162176.1 PREDICTED: glutathione S-transferase-like [Hydra vulgaris]	3.4e-19	Hematopoietic prostaglandin D synthase	NA	NA	NA	NA
Hsym|HyS0004.106	KXJ13487.1 Carboxypeptidase A4 [Exaiptasia pallida]	7.5e-82	Secreted carboxypeptidase	NA	metallocarboxypeptidase activity	proteolysis	integral component of membrane
Hsym|HyS0004.107	XP_002162809.2 PREDICTED: uncharacterized protein LOC100211529 [Hydra vulgaris]	1.9e-140	Myb transcription factor	NA	NA	NA	NA
Hsym|HyS0004.108	XP_020616774.1 DAZ-associated protein 2-like [Orbicella faveolata]	4.3e-08	Rna polymerase ii c terminal domain binding protein ra4	DAZAP2	mitogen-activated protein kinase kinase kinase binding	positive regulation of protein serine/threonine kinase activity	nuclear speck
Hsym|HyS0004.109	XP_022109822.1 116 kDa U5 small nuclear ribonucleoprotein component-like [Acanthaster planci]	0	Elongation factor Tu GTP-binding domain-containing protein 2	EFTUD2	GTPase activity	camera-type eye development	U2-type catalytic step 2 spliceosome
Hsym|HyS0004.110	XP_012559109.1 PREDICTED: uncharacterized protein LOC100205256 isoform X1 [Hydra vulgaris]	4.6e-08	NA	NA	NA	NA	NA
Hsym|HyS0004.111	XP_002163199.2 PREDICTED: cyclin-dependent kinase 13-like [Hydra vulgaris]	1.6e-178	Cyclin-dependent kinase	CDK12	protein kinase activity	protein phosphorylation	cyclin/CDK positive transcription elongation factor complex
Hsym|HyS0004.112	XP_004209590.1 PREDICTED: juxtaposed with another zinc finger protein 1-like [Hydra vulgaris]	5.6e-97	Juxtaposed with another zinc finger protein 1	JAZF1	nucleic acid binding	NA	NA
Hsym|HyS0004.113	XP_004211867.2 PREDICTED: nucleolar MIF4G domain-containing protein 1-like [Hydra vulgaris]	3.3e-165	Protein involved in high osmolarity signaling pathway	NOM1	RNA binding	hair follicle maturation	nucleolus
Hsym|HyS0004.114	XP_002157821.2 PREDICTED: contactin-associated protein-like 5 [Hydra vulgaris]	0	Cyclic AMP-dependent transcription factor ATF-7	ATF7	DNA-binding transcription factor activity	regulation of transcription, DNA-templated	nucleus
Hsym|HyS0004.115	XP_012562971.1 PREDICTED: beta-galactosidase-like [Hydra vulgaris]	4.1e-201	Beta-galactosidase	GLB1L	beta-galactosidase activity	carbohydrate metabolic process	vacuole
Hsym|HyS0004.116	XP_012555586.1 PREDICTED: ATP-binding cassette sub-family F member 2-like [Hydra vulgaris]	7.1e-263	ATP-binding cassette sub-family F member 2	NA	ATPase activity	NA	NA
Hsym|HyS0004.117	XP_012553551.1 PREDICTED: CLIP-associating protein 1-like [Hydra vulgaris]	0	Cytoplasmic linker associated protein 1	CLASP1	kinetochore binding	negative regulation of wound healing, spreading of epidermal cells	kinetochore microtubule
Hsym|HyS0004.118	RVE44930.1 hypothetical protein evm_010429 [Chilo suppressalis]	3.9e-08	NA	NA	NA	NA	NA
Hsym|HyS0004.119	XP_002167311.2 PREDICTED: polypeptide N-acetylgalactosaminyltransferase 13-like [Hydra vulgaris]	7.9e-271	Polypeptide N-acetylgalactosaminyltransferase	GALNT1	carbohydrate binding	protein glycosylation	Golgi membrane
Hsym|HyS0004.121	XP_002154502.2 PREDICTED: calmodulin-A-like [Hydra vulgaris]	9.4e-28	NA	NA	NA	NA	NA
Hsym|HyS0004.123	XP_012554990.1 PREDICTED: cyclin-dependent kinase 6-like [Hydra vulgaris]	7.2e-128	Cyclin-dependent kinase	CDK6	cyclin-dependent protein serine/threonine kinase activity	dedifferentiation	cyclin-dependent protein kinase holoenzyme complex
Hsym|HyS0004.124	XP_004209144.2 PREDICTED: R3H domain-containing protein 1-like [Hydra vulgaris]	9.5e-120	LOW QUALITY PROTEIN: cAMP-regulated phosphoprotein 21	NA	nucleic acid binding	cellular response to heat	cytoplasm
Hsym|HyS0004.125	XP_012561921.1 PREDICTED: glucocorticoid-induced transcript 1 protein-like [Hydra vulgaris]	2.9e-107	Glucocorticoid-induced 1	GLCCI1	NA	NA	cytoplasm
Hsym|HyS0004.126	XP_012562945.1 PREDICTED: synaptotagmin-1-like isoform X2 [Hydra vulgaris]	6.7e-89	NA	NA	NA	NA	NA
Hsym|HyS0004.127	XP_002740423.1 PREDICTED: epoxide hydrolase 4-like [Saccoglossus kowalevskii]	1.2e-71	Pimeloyl-ACP methyl ester carboxylesterase	NA	hydrolase activity	nucleotide catabolic process	integral component of membrane
Hsym|HyS0004.128	XP_022333925.1 epoxide hydrolase 4-like [Crassostrea virginica]	2.7e-51	Pimeloyl-ACP methyl ester carboxylesterase	NA	hydrolase activity	cellular lipid metabolic process	integral component of membrane
Hsym|HyS0004.129	XP_002160282.3 PREDICTED: breast cancer type 1 susceptibility protein homolog [Hydra vulgaris]	8.7e-51	NA	NA	NA	NA	NA
Hsym|HyS0004.130	XP_015767318.1 PREDICTED: partner of Y14 and mago-like [Acropora digitifera]	2.1e-14	PYM homolog 1, exon junction complex associated factor	NA	exon-exon junction complex binding	exon-exon junction complex disassembly	exon-exon junction complex
Hsym|HyS0004.131	XP_012556532.1 PREDICTED: SET and MYND domain-containing protein 4-like [Hydra vulgaris]	3.5e-151	SET and MYND domain-containing protein 4	NA	methyltransferase activity	methylation	NA
Hsym|HyS0004.132	XP_002160233.2 PREDICTED: phosphatidylinositol N-acetylglucosaminyltransferase subunit Q-like isoform X1 [Hydra vulgaris]	6.8e-54	Phosphatidylinositol N-acetylglucosaminyltransferase subunit Q	PIGQ	phosphatidylinositol N-acetylglucosaminyltransferase activity	GPI anchor biosynthetic process	glycosylphosphatidylinositol-N-acetylglucosaminyltransferase (GPI-GnT) complex
Hsym|HyS0004.133	XP_002154502.2 PREDICTED: calmodulin-A-like [Hydra vulgaris]	1.1e-28	NA	NA	NA	NA	NA
Hsym|HyS0004.134	XP_002156462.2 PREDICTED: tetraspanin-31-like [Hydra vulgaris]	2.7e-59	Tetraspanin-31-A	TSPAN13	calcium channel regulator activity	regulation of calcium ion transmembrane transport	integral component of membrane
Hsym|HyS0004.136	XP_002156677.1 PREDICTED: uncharacterized protein LOC100203952 [Hydra vulgaris]	1.6e-275	Lipocalin-1-interacting membrane receptor	NA	transmembrane signaling receptor activity	endocytosis	integral component of plasma membrane
Hsym|HyS0004.137	XP_012555824.1 PREDICTED: uncharacterized protein LOC105844134 [Hydra vulgaris]	1e-231	NA	NA	NA	NA	NA
Hsym|HyS0004.138	XP_002156347.1 PREDICTED: methyltransferase-like protein 6 [Hydra vulgaris]	1.8e-92	Methyltransferase-like protein 6	NA	methyltransferase activity	methylation	NA
Hsym|HyS0004.139	XP_002156156.1 PREDICTED: small ubiquitin-related modifier 1-like [Hydra vulgaris]	3.8e-36	Small ubiquitin-related modifier	SUMO1	transcription factor binding	definitive hemopoiesis	nucleus
Hsym|HyS0004.140	XP_002156706.1 PREDICTED: rap guanine nucleotide exchange factor 1-like [Hydra vulgaris]	1.4e-282	Rap guanine nucleotide exchange factor	RAPGEF1	guanyl-nucleotide exchange factor activity	small GTPase mediated signal transduction	early endosome
Hsym|HyS0004.142	KXJ28186.1 Transposon Ty3-I Gag-Pol polyprotein [Exaiptasia pallida]	5.4e-56	NA	NA	NA	NA	NA
Hsym|HyS0004.144	XP_015766951.1 PREDICTED: TP53-regulating kinase-like [Acropora digitifera]	3.5e-63	Serine/threonine protein kinase	TP53RK	protein serine/threonine kinase activity	protein phosphorylation	EKC/KEOPS complex
Hsym|HyS0004.145	XP_002164335.1 PREDICTED: protein HEXIM-like [Hydra vulgaris]	1.6e-46	Glycylpeptide N-tetradecanoyltransferase	NA	cyclin-dependent protein serine/threonine kinase inhibitor activity	negative regulation of cyclin-dependent protein serine/threonine kinase activity	nucleus
Hsym|HyS0004.146	XP_012553470.1 PREDICTED: golgin subfamily A member 4-like [Hydra vulgaris]	2.2e-48	NA	NA	NA	NA	NA
Hsym|HyS0004.147	XP_028417441.1 male-specific lethal 1-like 1 [Dendronephthya gigantea]	2.9e-29	Male-specific lethal-1	NA	NA	histone H4-K16 acetylation	MSL complex
Hsym|HyS0004.148	XP_012562849.1 PREDICTED: calpain-7-like [Hydra vulgaris]	0	Calpain catalytic domain-containing protein (Fragment)	CAPN7	calcium-dependent cysteine-type endopeptidase activity	self proteolysis	extracellular exosome
Hsym|HyS0004.149	XP_028392983.1 external alternative NAD(P)H-ubiquinone oxidoreductase B1, mitochondrial-like [Dendronephthya gigantea]	4.4e-133	External NADH-ubiquinone oxidoreductase	NA	calcium ion binding	oxidation-reduction process	mitochondrion
Hsym|HyS0004.150	XP_012555516.1 PREDICTED: E3 ubiquitin-protein ligase rnf146-like [Hydra vulgaris]	1.5e-54	E3 ubiquitin-protein ligase	NA	poly-ADP-D-ribose binding	Wnt signaling pathway	cytosol
Hsym|HyS0004.151	XP_002160020.3 PREDICTED: tricarboxylate transport protein, mitochondrial-like [Hydra vulgaris]	1.8e-141	Tricarboxylate transport protein B, mitochondrial	SLC25A1	citrate secondary active transmembrane transporter activity	citrate transport	integral component of membrane
Hsym|HyS0004.152	XP_022779328.1 uncharacterized protein LOC111320865 isoform X1 [Stylophora pistillata]	6.3e-64	NA	NA	NA	NA	NA
Hsym|HyS0004.153	XP_027053798.1 E3 ubiquitin-protein ligase MARCH11-like [Pocillopora damicornis]	3.9e-26	E3 ubiquitin-protein ligase march6	NA	zinc ion binding	NA	NA
Hsym|HyS0004.154	XP_004209151.1 PREDICTED: methyltransferase-like protein 2-A [Hydra vulgaris]	3.9e-118	2-hydroxyacyl-CoA lyase 1	NA	methyltransferase activity	methylation	nucleus
Hsym|HyS0004.155	XP_009909240.1 PREDICTED: proteasome activator complex subunit 3 [Picoides pubescens]	2.7e-50	Membrane-bound transcription factor site-2 protease	PSME3	endopeptidase activator activity	positive regulation of endopeptidase activity	proteasome activator complex
Hsym|HyS0004.156	XP_012561805.1 PREDICTED: uncharacterized protein LOC101240257 [Hydra vulgaris]	5.4e-26	NA	NA	NA	NA	NA
Hsym|HyS0004.157	EKC18187.1 Cubilin [Crassostrea gigas]	0	CUB and sushi domain-containing protein 1	NA	metalloendopeptidase activity	regulation of kainate selective glutamate receptor activity	integral component of membrane
Hsym|HyS0004.158	XP_026571923.1 cubilin-like [Pseudonaja textilis]	1.4e-19	Cubilin	NA	calcium ion binding	NA	NA
Hsym|HyS0004.159	EKC18187.1 Cubilin [Crassostrea gigas]	2.7e-189	Metalloendopeptidase	NA	calcium ion binding	proteolysis	NA
Hsym|HyS0004.160	XP_028413289.1 argininosuccinate lyase-like [Dendronephthya gigantea]	1.2e-172	Argininosuccinate lyase	ASL	argininosuccinate lyase activity	arginine biosynthetic process via ornithine	cytoplasm
Hsym|HyS0004.161	XP_012564334.1 PREDICTED: ras-like protein rasS [Hydra vulgaris]	1.5e-17	GTP-binding protein Rhes	LOC100179868	GTPase activity	signal transduction	membrane
Hsym|HyS0004.162	XP_012566880.1 PREDICTED: uncharacterized protein LOC100214463 [Hydra vulgaris]	2.7e-96	Putative cnidarian restricted protein	NA	NA	NA	NA
Hsym|HyS0004.163	XP_002164530.2 PREDICTED: 26S proteasome non-ATPase regulatory subunit 3-like [Hydra vulgaris]	1.2e-192	26S proteasome non-ATPase regulatory subunit 3	PSMD3	enzyme regulator activity	regulation of protein catabolic process	proteasome complex
Hsym|HyS0004.164	XP_001634944.1 predicted protein [Nematostella vectensis]	2.8e-19	NA	NA	NA	NA	NA
Hsym|HyS0004.165	XP_001623640.1 predicted protein [Nematostella vectensis]	2.8e-30	NA	NA	NA	NA	NA
Hsym|HyS0004.166	XP_020612823.1 protein timeless homolog isoform X2 [Orbicella faveolata]	2.9e-252	Timeless circadian regulator	TIMELESS	protein homodimerization activity	cellular response to bleomycin	site of double-strand break
Hsym|HyS0004.167	ACM62726.1 Dll1 distalless homeodomain protein [Clytia hemisphaerica]	2.1e-52	Transcription factor Dll	DLX6A	sequence-specific DNA binding	medial fin morphogenesis	nucleus
Hsym|HyS0004.168	XP_012560303.1 PREDICTED: uncharacterized protein LOC105846275 [Hydra vulgaris]	7.9e-47	NA	NA	NA	NA	NA
Hsym|HyS0004.169	XP_002166244.2 PREDICTED: ankyrin repeat domain-containing protein 54-like [Hydra vulgaris]	1.9e-49	LOW QUALITY PROTEIN: ankyrin repeat domain-containing protein 54	ANKRD54	protein kinase regulator activity	positive regulation of erythrocyte differentiation	midbody
Hsym|HyS0004.171	XP_002166901.2 PREDICTED: cytochrome P450 20A1-like [Hydra vulgaris]	3.1e-153	NA	NA	NA	NA	NA
Hsym|HyS0004.172	XP_002166901.2 PREDICTED: cytochrome P450 20A1-like [Hydra vulgaris]	4.2e-105	NA	NA	NA	NA	NA
Hsym|HyS0004.173	XP_009956750.1 PREDICTED: zinc metalloproteinase-disintegrin-like ohanin [Leptosomus discolor]	3.8e-74	Disintegrin CTF-II	NA	metalloendopeptidase activity	proteolysis	integral component of membrane
Hsym|HyS0004.174	XP_020892229.1 ankyrin repeat and zinc finger domain-containing protein 1-like [Exaiptasia pallida]	1.3e-78	Ankyrin repeat and zinc finger domain-containing protein 1	ANKZF1	nucleic acid binding	cellular response to hydrogen peroxide	Cdc48p-Npl4p-Vms1p AAA ATPase complex
Hsym|HyS0004.176	XP_012558949.1 PREDICTED: zygotic DNA replication licensing factor mcm6-B-like isoform X1 [Hydra vulgaris]	0	Zygotic DNA replication licensing factor mcm6-B	MCM6	DNA helicase activity	DNA replication initiation	MCM complex
Hsym|HyS0004.177	XP_012562837.1 PREDICTED: chondroitin sulfate glucuronyltransferase-like [Hydra vulgaris]	1.3e-205	Hexosyltransferase	NA	acetylgalactosaminyltransferase activity	hemidesmosome assembly	Golgi cisterna membrane
Hsym|HyS0004.178	XP_012556458.1 PREDICTED: unconventional myosin-Ia-like [Hydra vulgaris]	0	LOW QUALITY PROTEIN: unconventional myosin-Ia	MYO1A	actin binding	microvillus assembly	myosin complex
Hsym|HyS0004.179	XP_002161315.2 PREDICTED: uncharacterized protein LOC100209377, partial [Hydra vulgaris]	9.5e-27	NA	NA	NA	NA	NA
Hsym|HyS0004.180	XP_012557158.1 PREDICTED: bone morphogenetic protein receptor type-2-like [Hydra vulgaris]	2.5e-75	Receptor protein serine/threonine kinase	BMPR1B	transmembrane receptor protein serine/threonine kinase activity	transmembrane receptor protein serine/threonine kinase signaling pathway	receptor complex
Hsym|HyS0004.181	WP_012548383.1 serpin family protein [Dictyoglomus thermophilum]	1.2e-29	SERPIN domain-containing protein	NA	NA	NA	extracellular space
Hsym|HyS0004.182	XP_002160725.1 PREDICTED: ankyrin repeat domain-containing protein 39 homolog [Hydra vulgaris]	4.7e-07	NA	NA	NA	NA	NA
Hsym|HyS0004.184	XP_028406691.1 ficolin-1-B-like [Dendronephthya gigantea]	1.5e-05	NA	NA	NA	NA	NA
Hsym|HyS0004.187	XP_012557629.1 PREDICTED: uncharacterized protein LOC100199607 [Hydra vulgaris]	2.9e-78	Phox homologous domain	NA	phosphatidylinositol binding	late endosome to Golgi transport	protein-lipid complex
Hsym|HyS0004.188	XP_002163449.2 PREDICTED: multiple myeloma tumor-associated protein 2 homolog [Hydra vulgaris]	1.4e-43	Multiple myeloma tumor-associated protein 2	NA	kinase activity	vesicle-mediated transport	integral component of membrane
Hsym|HyS0004.189	XP_002160869.3 PREDICTED: major facilitator superfamily domain-containing protein 7-like [Hydra vulgaris]	1.2e-141	Major facilitator superfamily domain-containing protein 7-a	SLC49A3	NA	transmembrane transport	integral component of plasma membrane
Hsym|HyS0004.190	XP_012561517.1 PREDICTED: origin recognition complex subunit 4-like [Hydra vulgaris]	2.7e-151	Origin recognition complex subunit 4	ORC4	DNA binding	DNA replication	origin recognition complex
Hsym|HyS0004.191	XP_012560716.1 PREDICTED: 39S ribosomal protein L45, mitochondrial-like [Hydra vulgaris]	4.4e-59	39S ribosomal protein L45, mitochondrial	MRPL45	NA	NA	ribosome
Hsym|HyS0004.193	XP_002164791.1 PREDICTED: cytochrome c oxidase subunit NDUFA4-like [Hydra vulgaris]	5.1e-22	NADH dehydrogenase	NA	NA	NA	integral component of membrane
Hsym|HyS0004.194	XP_027056919.1 glutamate receptor ionotropic, NMDA 1-like [Pocillopora damicornis]	4e-56	NA	NA	NA	NA	NA
Hsym|HyS0004.195	XP_002167700.1 PREDICTED: activating transcription factor 7-interacting protein 2-like [Hydra vulgaris]	4.5e-28	Activating transcription factor	ATF7IP2	RNA-DNA hybrid ribonuclease activity	virion assembly	nucleus
Hsym|HyS0004.196	XP_012557616.1 PREDICTED: D-amino-acid oxidase-like [Hydra vulgaris]	4e-62	Amino acid oxidase	NA	D-amino-acid oxidase activity	D-amino acid metabolic process	NA
Hsym|HyS0004.197	XP_005848806.1 hypothetical protein CHLNCDRAFT_144079 [Chlorella variabilis]	1e-09	NA	NA	NA	NA	NA
Hsym|HyS0004.198	XP_012557616.1 PREDICTED: D-amino-acid oxidase-like [Hydra vulgaris]	1.7e-65	D-amino-acid oxidase	NA	D-amino-acid oxidase activity	D-amino acid metabolic process	lipid droplet
Hsym|HyS0004.199	XP_012558651.1 PREDICTED: PTB domain-containing adapter protein ced-6-like [Hydra vulgaris]	2.7e-52	PTB domain-containing engulfment adapter protein 1	GULP1	NA	NA	integral component of membrane
Hsym|HyS0004.200	XP_003245388.1 PREDICTED: zinc finger protein 2 isoform X2 [Acyrthosiphon pisum]	1.9e-08	NA	NA	NA	NA	NA
Hsym|HyS0004.201	XP_012558716.1 PREDICTED: separin-like [Hydra vulgaris]	3.3e-201	Cysteine-type endopeptidase	ESPL1	peptidase activity	proteolysis	nucleus
Hsym|HyS0004.202	XP_002156323.2 PREDICTED: 3-hydroxyisobutyrate dehydrogenase, mitochondrial-like [Hydra vulgaris]	1.1e-121	3-hydroxyisobutyrate dehydrogenase, mitochondrial	HIBADH	3-hydroxyisobutyrate dehydrogenase activity	valine catabolic process	mitochondrial matrix
Hsym|HyS0004.203	XP_011425103.1 PREDICTED: probable cytochrome P450 CYP44 [Crassostrea gigas]	4.2e-52	1,25-dihydroxyvitamin D(3) 24-hydroxylase, mitochondrial	NA	oxidoreductase activity, acting on paired donors, with incorporation or reduction of molecular oxygen	oxidation-reduction process	integral component of membrane
Hsym|HyS0004.204	XP_012557770.1 PREDICTED: uncharacterized protein LOC105845033 [Hydra vulgaris]	1.3e-06	NA	NA	NA	NA	NA
Hsym|HyS0004.206	XP_012558085.1 PREDICTED: uncharacterized protein LOC105845180 [Hydra vulgaris]	4e-06	NA	NA	NA	NA	NA
Hsym|HyS0004.207	XP_012561761.1 PREDICTED: integrin beta-2-like [Hydra vulgaris]	2.8e-154	Integrin beta	NA	extracellular matrix protein binding	integrin-mediated signaling pathway	integrin complex
Hsym|HyS0004.208	XP_012558731.1 PREDICTED: uncharacterized protein LOC105845472 [Hydra vulgaris]	1.6e-12	NA	NA	NA	NA	NA
Hsym|HyS0004.209	NP_001274312.1 nucleoside diphosphate kinase-like [Hydra vulgaris]	4.8e-60	Nucleoside diphosphate kinase	NA	nucleoside diphosphate kinase activity	UTP biosynthetic process	fungal biofilm matrix
Hsym|HyS0004.210	XP_002168747.2 PREDICTED: protein unc-45 homolog A-like [Hydra vulgaris]	0	Putative myosin assembly protein/sexual cycle protein (Fragment)	NA	NA	NA	NA
Hsym|HyS0004.211	XP_002155837.2 PREDICTED: calcium-binding mitochondrial carrier protein Aralar2 [Hydra vulgaris]	8.1e-272	Calcium-binding mitochondrial carrier	SLC25A13	calcium ion binding	transmembrane transport	integral component of membrane
Hsym|HyS0004.212	KXJ15292.1 Sugar transporter SWEET1 [Exaiptasia pallida]	1.7e-32	NA	NA	NA	NA	NA
Hsym|HyS0004.213	AAQ90468.1 neural alfa2 tubulin [Paracentrotus lividus]	1.8e-251	Tubulin alpha chain	NA	structural constituent of cytoskeleton	microtubule-based process	microtubule
Hsym|HyS0004.214	XP_012556237.1 PREDICTED: uncharacterized protein LOC100209023 [Hydra vulgaris]	0	Histone-lysine N-methyltransferase	NA	histone-lysine N-methyltransferase activity	histone lysine methylation	histone methyltransferase complex
Hsym|HyS0004.215	XP_002156574.2 PREDICTED: cyclin-T1-like [Hydra vulgaris]	1.4e-134	CYCLIN domain-containing protein (Fragment)	NA	cyclin-dependent protein serine/threonine kinase activator activity	transcription, DNA-templated	cyclin/CDK positive transcription elongation factor complex
Hsym|HyS0004.216	XP_012556238.1 PREDICTED: uncharacterized protein LOC101234494 [Hydra vulgaris]	1.2e-19	NA	NA	NA	NA	NA
Hsym|HyS0004.217	XP_026124995.1 glycerol-3-phosphate dehydrogenase [NAD(+)], cytoplasmic-like [Carassius auratus]	5e-84	NAD-dependent glycerol-3-phosphate dehydrogenase C-terminus-domain-containing protein	NA	glycerol-3-phosphate dehydrogenase [NAD+] activity	glycerol-3-phosphate catabolic process	glycerol-3-phosphate dehydrogenase complex
Hsym|HyS0004.218	XP_004207662.1 PREDICTED: protein zyg-11 homolog [Hydra vulgaris]	6.7e-89	Early embryogenesis protein zyg-11	NA	protein serine/threonine kinase activity	protein phosphorylation	Cul2-RING ubiquitin ligase complex
Hsym|HyS0004.219	XP_012558511.1 PREDICTED: SAP domain-containing ribonucleoprotein-like [Hydra vulgaris]	6.6e-15	NA	NA	NA	NA	NA
Hsym|HyS0004.220	XP_012562371.1 PREDICTED: SWI/SNF-related matrix-associated actin-dependent regulator of chromatin subfamily E member 1-like [Hydra vulgaris]	1.8e-93	SWI/SNF-related matrix-associated actin-dependent regulator of chromatin subfamily E member 1	SMARCE1	DNA binding	ATP-dependent chromatin remodeling	SWI/SNF complex
Hsym|HyS0004.221	XP_012555963.1 PREDICTED: cyclic AMP-responsive element-binding protein isoform X1 [Hydra vulgaris]	2e-76	cAMP response element-binding protein invertebrate	NA	DNA-binding transcription factor activity	regulation of transcription, DNA-templated	nucleus
Hsym|HyS0004.222	XP_012556428.1 PREDICTED: epithelial discoidin domain-containing receptor 1-like [Hydra vulgaris]	5.3e-90	EGF-like repeat and discoidin I-like domain-containing protein 3	NA	hyaluronic acid binding	adenylate cyclase-activating G protein-coupled receptor signaling pathway	collagen trimer
Hsym|HyS0004.223	XP_012561828.1 PREDICTED: probable methyltransferase BTM2 homolog [Hydra vulgaris]	2e-69	S-adenosylmethionine sensor upstream of mTORC1	BMT2	methyltransferase activity	methylation	KICSTOR complex
Hsym|HyS0004.224	XP_012561835.1 PREDICTED: probable C-mannosyltransferase DPY19L1 [Hydra vulgaris]	4.8e-264	Dpy-19 like C-mannosyltransferase 1	DPY19L1	transferase activity, transferring glycosyl groups	protein C-linked glycosylation	nuclear inner membrane
Hsym|HyS0004.225	XP_022800048.1 arf-GAP with coiled-coil, ANK repeat and PH domain-containing protein 2-like [Stylophora pistillata]	5.1e-09	NA	NA	NA	NA	NA
Hsym|HyS0004.226	XP_027054350.1 D(2) dopamine receptor-like [Pocillopora damicornis]	5.9e-25	NA	NA	NA	NA	NA
Hsym|HyS0004.228	RMX40891.1 hypothetical protein pdam_00012026 [Pocillopora damicornis]	9e-73	ATP-binding cassette sub-family A member	ABCA1	ATPase-coupled transmembrane transporter activity	transmembrane transport	integral component of membrane
Hsym|HyS0004.229	XP_012556401.1 PREDICTED: ATP-binding cassette sub-family A member 3 [Hydra vulgaris]	1.9e-65	ATP-binding cassette transporter subfamily A	NA	ATPase-coupled transmembrane transporter activity	transmembrane transport	integral component of membrane
Hsym|HyS0004.230	XP_015767424.1 PREDICTED: protein mab-21-like 2 [Acropora digitifera]	1.2e-06	NA	NA	NA	NA	NA
Hsym|HyS0004.231	XP_004211747.1 PREDICTED: cell wall protein PRY3-like [Hydra vulgaris]	1.4e-89	Bifunctional aspartokinase homoserine dehydrogenase chloroplastic-like	NA	cellulose binding	cellulose catabolic process	extracellular region
Hsym|HyS0004.232	KXJ11604.1 Chondroitin proteoglycan 2 [Exaiptasia pallida]	5.5e-08	NA	NA	NA	NA	NA
Hsym|HyS0004.233	XP_001638232.1 predicted protein [Nematostella vectensis]	1.5e-43	Calponin homology domain-containing	NA	chitin binding	chitin metabolic process	extracellular region
Hsym|HyS0004.234	XP_015751345.1 PREDICTED: uncharacterized protein LOC107331289 isoform X1 [Acropora digitifera]	9e-93	NA	NA	NA	NA	NA
Hsym|HyS0004.235	KXJ16862.1 hypothetical protein AC249_AIPGENE12339 [Exaiptasia pallida]	1.6e-05	NA	NA	NA	NA	NA
Hsym|HyS0004.237	XP_002168625.2 PREDICTED: pyridine nucleotide-disulfide oxidoreductase domain-containing protein 1-like isoform X1 [Hydra vulgaris]	3.4e-123	Pyridine nucleotide disulfide oxidoreductase	NA	oxidoreductase activity	oxidation-reduction process	sarcomere
Hsym|HyS0004.238	XP_027049713.1 uncharacterized protein LOC113677154 [Pocillopora damicornis]	4.8e-36	PHB domain-containing protein (Fragment)	NA	NA	generation of catalytic spliceosome for second transesterification step	integral component of membrane
Hsym|HyS0004.239	XP_002171169.3 PREDICTED: alanyl-tRNA editing protein Aarsd1-A-like [Hydra vulgaris]	1.6e-145	Alanyl-trna synthetase domain-containing protein 1	NA	alanine-tRNA ligase activity	alanyl-tRNA aminoacylation	cytoplasm
Hsym|HyS0004.241	XP_012566783.1 PREDICTED: telomere-associated protein RIF1-like isoform X1 [Hydra vulgaris]	2.2e-271	Telomere-associated protein RIF1 (Fragment)	NA	NA	NA	NA
Hsym|HyS0004.242	XP_026183446.1 tubulin alpha-1B chain-like [Mastacembelus armatus]	7.5e-250	Tubulin alpha chain	NA	structural constituent of cytoskeleton	microtubule-based process	microtubule
Hsym|HyS0004.244	XP_001640994.1 predicted protein [Nematostella vectensis]	2e-26	NA	NA	NA	NA	NA
Hsym|HyS0004.245	XP_002162916.2 PREDICTED: syntaxin-6-like [Hydra vulgaris]	2e-69	t-SNARE coiled-coil homology domain-containing protein (Fragment)	STX10	SNAP receptor activity	Golgi vesicle transport	trans-Golgi network
Hsym|HyS0004.246	XP_003420624.1 cullin-1 [Loxodonta africana]	5.6e-306	Cullin-1	CUL1	ubiquitin protein ligase binding	ubiquitin-dependent protein catabolic process	cullin-RING ubiquitin ligase complex
Hsym|HyS0004.247	XP_015759831.1 PREDICTED: uncharacterized protein K02A2.6-like [Acropora digitifera]	4.3e-05	NA	NA	NA	NA	NA
Hsym|HyS0004.251	XP_012560049.1 PREDICTED: gamma-aminobutyric acid receptor subunit beta-2-like isoform X1 [Hydra vulgaris]	6.9e-46	NA	NA	NA	NA	NA
Hsym|HyS0004.252	XP_018016607.1 PREDICTED: LOW QUALITY PROTEIN: low choriolytic enzyme-like [Hyalella azteca]	2.2e-23	Carbohydrate-binding WSC	NA	chitin binding	chitin metabolic process	extracellular region
Hsym|HyS0004.254	XP_020606154.1 sushi, von Willebrand factor type A, EGF and pentraxin domain-containing protein 1-like [Orbicella faveolata]	2.5e-14	NA	NA	NA	NA	NA
Hsym|HyS0004.255	XP_020893072.1 sterol O-acyltransferase 1-like isoform X2 [Exaiptasia pallida]	1.8e-146	O-acyltransferase	SOAT1	O-acyltransferase activity	cholesterol metabolic process	endoplasmic reticulum membrane
Hsym|HyS0004.256	XP_002600645.1 hypothetical protein BRAFLDRAFT_102424 [Branchiostoma floridae]	8.5e-197	Granulin precursor	GRN	chaperone binding	positive regulation of lysosome organization	lysosomal membrane
Hsym|HyS0004.257	XP_012557049.1 PREDICTED: protein O-mannose kinase-like [Hydra vulgaris]	7.3e-74	Protein kinase domain-containing protein (Fragment)	POMK	carbohydrate kinase activity	protein O-linked glycosylation	endoplasmic reticulum membrane
Hsym|HyS0004.258	PFX27574.1 Carbonyl reductase [NADPH] 1 [Stylophora pistillata]	4e-58	Adenylyl cyclase-associated protein 1	NA	potassium channel activity	potassium ion transmembrane transport	integral component of membrane
Hsym|HyS0004.260	BAB13535.1 hym-323 [Hydra vulgaris]	2.3e-17	Mitochondrial ATP synthase subunit epsilon	ATP5E	proton-transporting ATP synthase activity, rotational mechanism	energy coupled proton transport, down electrochemical gradient	mitochondrial proton-transporting ATP synthase complex, catalytic core F(1)
Hsym|HyS0004.261	XP_018670845.1 uncharacterized protein LOC100187431 [Ciona intestinalis]	1.3e-178	Tyrosine phosphatase, receptor type, N polypeptide 2	PTPRN2	protein tyrosine phosphatase activity	peptidyl-tyrosine dephosphorylation	secretory granule
Hsym|HyS0004.262	XP_012557608.1 PREDICTED: polycomb complex protein BMI-1-like [Hydra vulgaris]	3.1e-80	Polycomb group protein Psc	NA	chromatin binding	syncytial blastoderm mitotic cell cycle	PRC1 complex
Hsym|HyS0004.264	XP_022804379.1 uncharacterized protein LOC111341667 [Stylophora pistillata]	0.00046	NA	NA	NA	NA	NA
Hsym|HyS0004.267	XP_002155362.2 PREDICTED: peptidyl-prolyl cis-trans isomerase G-like [Hydra vulgaris]	3e-110	Peptidyl-prolyl cis-trans isomerase G	NA	peptidyl-prolyl cis-trans isomerase activity	protein peptidyl-prolyl isomerization	mediator complex
Hsym|HyS0004.268	XP_019041357.1 hypothetical protein WICANDRAFT_38191 [Wickerhamomyces anomalus NRRL Y-366-8]	1.2e-21	NA	NA	NA	NA	NA
Hsym|HyS0004.271	XP_012557608.1 PREDICTED: polycomb complex protein BMI-1-like [Hydra vulgaris]	1e-86	Polycomb group protein Psc	NA	chromatin binding	histone H2A-K119 monoubiquitination	PRC1 complex
Hsym|HyS0004.273	XP_019041357.1 hypothetical protein WICANDRAFT_38191 [Wickerhamomyces anomalus NRRL Y-366-8]	1.2e-21	NA	NA	NA	NA	NA
Hsym|HyS0004.274	KXJ06113.1 hypothetical protein AC249_AIPGENE15757 [Exaiptasia pallida]	2.2e-05	NA	NA	NA	NA	NA
Hsym|HyS0004.275	XP_013418802.1 tetratricopeptide repeat protein 38-like [Lingula anatina]	7.1e-134	LOW QUALITY PROTEIN: tetratricopeptide repeat protein 38	TTC38	Rab GTPase binding	exocytosis	extracellular exosome
Hsym|HyS0004.277	XP_028413289.1 argininosuccinate lyase-like [Dendronephthya gigantea]	6.7e-177	Argininosuccinate lyase	ASL	argininosuccinate lyase activity	arginine biosynthetic process via ornithine	cytoplasm
Hsym|HyS0004.278	XP_023930314.1 prolow-density lipoprotein receptor-related protein 1 [Lingula anatina]	1.2e-15	NA	NA	NA	NA	NA
Hsym|HyS0004.279	XP_012559681.1 PREDICTED: SH3 domain-binding protein 5-like [Hydra vulgaris]	9.4e-64	SH3 domain-binding protein 5 homolog	NA	protein kinase inhibitor activity	intracellular signal transduction	cytoplasm
Hsym|HyS0004.280	XP_004208525.1 PREDICTED: uncharacterized protein LOC101238213 [Hydra vulgaris]	7.6e-15	NA	NA	NA	NA	NA
Hsym|HyS0004.281	XP_013418802.1 tetratricopeptide repeat protein 38-like [Lingula anatina]	3.4e-134	LOW QUALITY PROTEIN: tetratricopeptide repeat protein 38	TTC38	Rab GTPase binding	exocytosis	extracellular exosome
Hsym|HyS0004.283	XP_028413289.1 argininosuccinate lyase-like [Dendronephthya gigantea]	7.4e-176	Argininosuccinate lyase	ASL	argininosuccinate lyase activity	arginine biosynthetic process via ornithine	cytoplasm
Hsym|HyS0004.285	XP_002428850.1 conserved hypothetical protein [Pediculus humanus corporis]	4.9e-09	NA	NA	NA	NA	NA
Hsym|HyS0004.286	XP_012559681.1 PREDICTED: SH3 domain-binding protein 5-like [Hydra vulgaris]	2e-67	Putative btk-associated sh3-domain binding protein sab	SH3BP5L	protein kinase inhibitor activity	intracellular signal transduction	cytoplasm
Hsym|HyS0004.287	XP_022787443.1 synaptosomal-associated protein 47-like isoform X2 [Stylophora pistillata]	8e-62	NA	NA	NA	NA	NA
Hsym|HyS0004.288	XP_012557871.1 PREDICTED: uncharacterized protein LOC100204111 [Hydra vulgaris]	0	Glycoprotein-N-acetylgalactosamine 3-beta-galactosyltransferase 1	NA	oxidoreductase activity, acting on paired donors, with incorporation or reduction of molecular oxygen, reduced ascorbate as one donor, and incorporation of one atom of oxygen	oxidation-reduction process	membrane
Hsym|HyS0004.289	XP_012555316.1 PREDICTED: transcriptional repressor NF-X1-like [Hydra vulgaris]	0	Nuclear transcription factor, X-box-binding 1	NFX1	zinc ion binding	negative regulation of MHC class II biosynthetic process	nucleus
Hsym|HyS0004.290	XP_012557056.1 PREDICTED: transmembrane protein 245-like [Hydra vulgaris]	4e-215	Beta-3 adrenergic receptor	TMEM245	actin filament binding	Rho protein signal transduction	integral component of membrane
Hsym|HyS0004.292	XP_020607614.1 uncharacterized protein LOC110046267 [Orbicella faveolata]	3.3e-107	NA	NA	NA	NA	NA
Hsym|HyS0004.293	XP_007058393.1 synaptic vesicle 2-related protein [Chelonia mydas]	2.9e-60	NA	NA	NA	NA	NA
Hsym|HyS0004.296	XP_022791826.1 solute carrier family 23 member 2-like [Stylophora pistillata]	2.7e-176	Xanthine permease	NA	transmembrane transporter activity	transmembrane transport	integral component of membrane
Hsym|HyS0004.297	XP_020896853.1 solute carrier family 23 member 2-like [Exaiptasia pallida]	3.4e-154	Xanthine permease	NA	transmembrane transporter activity	transmembrane transport	integral component of membrane
Hsym|HyS0004.298	XP_012566844.1 PREDICTED: short stature homeobox protein-like [Hydra vulgaris]	3.3e-30	Homeobox domain-containing protein (Fragment)	NA	sequence-specific DNA binding	regulation of transcription, DNA-templated	nucleus
Hsym|HyS0004.299	XP_012558961.1 PREDICTED: protein OS-9-like [Hydra vulgaris]	5.4e-62	PRKCSH domain-containing protein	NA	NA	NA	NA
Hsym|HyS0004.300	ACS12894.1 3-phosphoglycerate dehydrogenase-like protein [Chironex fleckeri]	1.5e-137	D-3-phosphoglycerate dehydrogenase	NA	phosphoglycerate dehydrogenase activity	L-serine biosynthetic process	integral component of membrane
Hsym|HyS0004.301	XP_020600813.1 atrial natriuretic peptide receptor 1-like isoform X2 [Orbicella faveolata]	3.6e-139	Guanylate cyclase	NA	guanylate cyclase activity	cGMP biosynthetic process	integral component of membrane
Hsym|HyS0004.302	XP_002162887.1 PREDICTED: ADP-ribosylation factor 1-like 2 [Hydra vulgaris]	5.5e-95	ADP ribosylation factor	NA	GTP binding	ARF protein signal transduction	cleavage furrow
Hsym|HyS0004.303	XP_012555315.1 PREDICTED: uncharacterized protein PF11_0213-like [Hydra vulgaris]	1.7e-27	Leucine-rich repeat flightless-interacting protein 1	NA	NA	regulation of transcription, DNA-templated	NA
Hsym|HyS0004.304	AHX24685.1 Erg1 [Nematostella vectensis]	1.7e-244	Potassium voltage-gated channel	KCNH7	voltage-gated potassium channel activity	regulation of ion transmembrane transport	integral component of membrane
Hsym|HyS0004.305	XP_015761058.1 PREDICTED: cyclic GMP-AMP synthase-like [Acropora digitifera]	2e-80	Mitochondrial dynamics protein MID51	NA	NA	NA	NA
Hsym|HyS0004.306	XP_002161388.1 PREDICTED: nucleolar and coiled-body phosphoprotein 1-like [Hydra vulgaris]	6.2e-36	Nucleolar and coiled-body phosphoprotein 1	NA	RNA polymerase I core binding	embryonic cranial skeleton morphogenesis	nucleolus
Hsym|HyS0004.307	XP_012561602.1 PREDICTED: uncharacterized protein LOC101237375 [Hydra vulgaris]	1.1e-21	NA	NA	NA	NA	NA
Hsym|HyS0004.308	XP_002741982.1 PREDICTED: 5-hydroxytryptamine receptor 1-like [Saccoglossus kowalevskii]	1.4e-10	NA	NA	NA	NA	NA
Hsym|HyS0004.309	XP_022106793.1 histamine H2 receptor-like [Acanthaster planci]	9.9e-12	NA	NA	NA	NA	NA
Hsym|HyS0004.310	XP_002161936.2 PREDICTED: tolloid-like protein 1 [Hydra vulgaris]	4.6e-207	Coagulation factor IX	NA	serine-type endopeptidase activity	proteolysis	integral component of membrane
Hsym|HyS0004.311	XP_002160881.1 PREDICTED: rhodopsin, GQ-coupled-like [Hydra vulgaris]	1e-104	Neuropeptide-like GPCR	NA	G protein-coupled receptor activity	neuropeptide signaling pathway	integral component of membrane
Hsym|HyS0004.312	XP_012555278.1 PREDICTED: GPI inositol-deacylase-like [Hydra vulgaris]	1.7e-113	GPI inositol-deacylase	PGAP1	hydrolase activity, acting on ester bonds	protein transport	endoplasmic reticulum
Hsym|HyS0004.314	XP_012561884.1 PREDICTED: nuclear pore complex protein DDB_G0274915-like, partial [Hydra vulgaris]	2.6e-27	LPXTG cell wall surface protein	NA	collagen binding	chitin metabolic process	extracellular region
Hsym|HyS0004.315	RNA15112.1 collagen alpha-1(XII) chain-like [Brachionus plicatilis]	4e-07	NA	NA	NA	NA	NA
Hsym|HyS0004.316	RNA15112.1 collagen alpha-1(XII) chain-like [Brachionus plicatilis]	1e-08	NA	NA	NA	NA	NA
Hsym|HyS0004.317	XP_002157873.1 PREDICTED: universal stress protein A-like protein [Hydra vulgaris]	8.5e-27	Stress response protein NhaX	USP	NA	NA	NA
Hsym|HyS0004.318	XP_001636809.1 predicted protein [Nematostella vectensis]	1.1e-30	Stress response protein nhaX	NA	NA	NA	NA
Hsym|HyS0004.319	XP_002157873.1 PREDICTED: universal stress protein A-like protein [Hydra vulgaris]	9.4e-22	Usp domain-containing protein	NA	NA	NA	NA
Hsym|HyS0004.320	XP_002157873.1 PREDICTED: universal stress protein A-like protein [Hydra vulgaris]	1.1e-27	Usp domain-containing protein	NA	NA	NA	NA
Hsym|HyS0004.321	XP_002170084.2 PREDICTED: universal stress protein A-like protein [Hydra vulgaris]	1e-25	Stress response protein nhaX	NA	NA	NA	NA
Hsym|HyS0004.322	XP_020613070.1 uncharacterized protein LOC110051374 [Orbicella faveolata]	6e-23	Usp domain-containing protein (Fragment)	NA	NA	NA	NA
Hsym|HyS0004.323	XP_012553697.1 PREDICTED: universal stress protein A-like protein isoform X1 [Hydra vulgaris]	1.1e-28	NA	NA	NA	NA	NA
Hsym|HyS0004.324	XP_004206820.1 PREDICTED: universal stress protein A-like protein [Hydra vulgaris]	2.1e-29	Usp domain-containing protein	NA	NA	NA	NA
Hsym|HyS0004.325	RMX38970.1 hypothetical protein pdam_00008188 [Pocillopora damicornis]	1.9e-33	Universal stress protein UspA	NA	NA	NA	NA
Hsym|HyS0004.326	XP_004206820.1 PREDICTED: universal stress protein A-like protein [Hydra vulgaris]	3.3e-27	Usp domain-containing protein (Fragment)	NA	NA	NA	NA
Hsym|HyS0004.327	XP_004206820.1 PREDICTED: universal stress protein A-like protein [Hydra vulgaris]	4.5e-29	Universal stress protein YxiE	USP	2 iron, 2 sulfur cluster binding	tricarboxylic acid cycle	cytoskeleton
Hsym|HyS0004.328	XP_012553697.1 PREDICTED: universal stress protein A-like protein isoform X1 [Hydra vulgaris]	2.4e-23	Usp domain-containing protein	NA	NA	NA	NA
Hsym|HyS0004.329	RMX38970.1 hypothetical protein pdam_00008188 [Pocillopora damicornis]	4.1e-39	Universal stress protein YxiE	USP	NA	NA	integral component of membrane
Hsym|HyS0004.330	XP_002157873.1 PREDICTED: universal stress protein A-like protein [Hydra vulgaris]	2e-10	Nucleotide-binding universal stress protein, UspA family	NA	NA	NA	NA
Hsym|HyS0004.331	XP_022338411.1 SCO-spondin-like isoform X1 [Crassostrea virginica]	5.2e-81	A disintegrin and metalloproteinase with thrombospondin motifs 2-like	THBS1	extracellular matrix binding	negative regulation of angiogenesis	extracellular space
Hsym|HyS0004.332	KXJ23850.1 Cilia- and flagella-associated protein 69 [Exaiptasia pallida]	1.7e-224	cilia- and flagella-associated protein 69	CFAP69	NA	positive regulation of flagellated sperm motility	motile cilium
Hsym|HyS0004.333	XP_020909495.1 EF-hand calcium-binding domain-containing protein 12-like [Exaiptasia pallida]	6.8e-34	NA	NA	NA	NA	NA
Hsym|HyS0004.334	XP_002166193.3 PREDICTED: Niemann-Pick C1 protein-like [Hydra vulgaris]	3.8e-202	Patched domain-containing protein 3	PTCHD3	NA	NA	integral component of membrane
Hsym|HyS0004.335	XP_012558818.1 PREDICTED: voltage-dependent calcium channel subunit alpha-2/delta-4-like isoform X1 [Hydra vulgaris]	2.1e-85	VWFA domain-containing protein	NA	NA	NA	NA
Hsym|HyS0004.336	XP_012558818.1 PREDICTED: voltage-dependent calcium channel subunit alpha-2/delta-4-like isoform X1 [Hydra vulgaris]	2.4e-113	Voltage-dependent calcium channel subunit alpha-2/delta-3-like protein (Fragment)	NA	NA	NA	NA
Hsym|HyS0004.337	XP_012558818.1 PREDICTED: voltage-dependent calcium channel subunit alpha-2/delta-4-like isoform X1 [Hydra vulgaris]	1.9e-115	Voltage-dependent calcium channel subunit alpha-2/delta-3-like protein (Fragment)	NA	NA	NA	NA
Hsym|HyS0004.338	XP_012558818.1 PREDICTED: voltage-dependent calcium channel subunit alpha-2/delta-4-like isoform X1 [Hydra vulgaris]	4.5e-110	NA	NA	NA	NA	NA
Hsym|HyS0004.339	XP_001626394.1 predicted protein [Nematostella vectensis]	3.8e-15	NA	NA	NA	NA	NA
Hsym|HyS0004.340	XP_012553967.1 PREDICTED: low density lipoprotein receptor adapter protein 1-like [Hydra vulgaris]	4.7e-52	NA	NA	NA	NA	NA
Hsym|HyS0004.341	XP_001622235.1 hypothetical protein NEMVEDRAFT_v1g248535 [Nematostella vectensis]	0	ADP-ribose pyrophosphatase	NA	ADP-ribose diphosphatase activity	ion transmembrane transport	mitochondrion
Hsym|HyS0004.342	XP_002610877.1 hypothetical protein BRAFLDRAFT_94870 [Branchiostoma floridae]	1.4e-07	NA	NA	NA	NA	NA
Hsym|HyS0004.343	XP_012559168.1 PREDICTED: SWI/SNF-related matrix-associated actin-dependent regulator of chromatin subfamily A-like protein 1 [Hydra vulgaris]	9.3e-144	Zinc finger Ran-binding domain-containing protein 3	SMARCAL1	annealing helicase activity	DNA strand renaturation	nuclear replication fork
Hsym|HyS0004.344	XP_002161600.1 PREDICTED: zinc finger protein 622-like [Hydra vulgaris]	1.1e-103	Cyclic nucleotide-binding domain-containing protein	ZNF622	zinc ion binding	ribosomal large subunit biogenesis	preribosome, large subunit precursor
Hsym|HyS0004.345	XP_022787287.1 E3 ubiquitin-protein ligase ZSWIM2-like [Stylophora pistillata]	1.7e-75	Zinc finger SWIM domain-containing protein 2	ZSWIM2	ubiquitin protein ligase activity	protein ubiquitination	integral component of membrane
Hsym|HyS0004.346	XP_002164628.1 PREDICTED: 60S ribosomal protein L37a-like [Hydra vulgaris]	2.6e-40	Large subunit ribosomal protein L37Ae	RPL37A	structural constituent of ribosome	translation	ribosome
Hsym|HyS0004.347	XP_012557943.1 PREDICTED: coiled-coil and C2 domain-containing protein 2A [Hydra vulgaris]	0	Coiled-coil and C2 domain-containing protein 2A	CC2D2A	nucleic acid binding	photoreceptor cell outer segment organization	photoreceptor connecting cilium
Hsym|HyS0004.348	XP_002161894.2 PREDICTED: serine/threonine-protein kinase DCLK1-like [Hydra vulgaris]	3.7e-171	TPR and ankyrin repeat-containing protein 1	DCLK3	protein kinase activity	protein phosphorylation	nucleus
Hsym|HyS0004.349	XP_002161389.3 PREDICTED: lysine-specific demethylase 8-like [Hydra vulgaris]	2.3e-129	jmjC domain-containing protein 5	NA	2-oxoglutarate-dependent dioxygenase activity	oxidation-reduction process	integral component of membrane
Hsym|HyS0004.350	XP_002165751.1 PREDICTED: homeobox protein ceh-9-like [Hydra vulgaris]	1.8e-19	Homeobox transcription factor Gorget	NA	sequence-specific DNA binding	regulation of transcription, DNA-templated	nucleus
Hsym|HyS0004.351	ABG80450.1 fibrillar collagen, partial [Hydra vulgaris]	2e-144	Type IIA procollagen	COL2A1	extracellular matrix structural constituent	embryonic skeletal joint morphogenesis	collagen trimer
Hsym|HyS0004.352	XP_004210605.2 PREDICTED: neural Wiskott-Aldrich syndrome protein-like [Hydra vulgaris]	5.1e-11	Wiskott-Aldrich syndrome protein (Fragment)	NA	actin binding	positive regulation of Arp2/3 complex-mediated actin nucleation	actin cortical patch
Hsym|HyS0004.353	XP_012558205.1 PREDICTED: glycosyltransferase-like domain-containing protein 1 isoform X2 [Hydra vulgaris]	1.8e-124	Glycosyltransferase like domain containing protein 1	GTDC1	transferase activity	central nervous system development	NA
Hsym|HyS0004.354	XP_012558970.1 PREDICTED: otoferlin-like [Hydra vulgaris]	0	Otoferlin a	OTOF	calcium ion binding	synaptic vesicle exocytosis	presynapse
Hsym|HyS0004.355	XP_004210605.2 PREDICTED: neural Wiskott-Aldrich syndrome protein-like [Hydra vulgaris]	1.4e-92	WASP actin nucleation-promoting factor b	NA	actin binding	positive regulation of Arp2/3 complex-mediated actin nucleation	actin filament
Hsym|HyS0004.356	XP_004210605.2 PREDICTED: neural Wiskott-Aldrich syndrome protein-like [Hydra vulgaris]	7.6e-71	Wiskott-Aldrich syndrome	NA	actin binding	positive regulation of Arp2/3 complex-mediated actin nucleation	actin cortical patch
Hsym|HyS0004.358	RXN22156.1 zinc metallo ase-disintegrin-like batroxstatin-1 [Labeo rohita]	3.1e-37	Disintegrin and metalloproteinase domain-containing protein 7	NA	metalloendopeptidase activity	proteolysis	extracellular region
Hsym|HyS0004.365	XP_014672322.1 PREDICTED: uncharacterized protein LOC106812853 [Priapulus caudatus]	1.3e-25	NA	NA	NA	NA	NA
Hsym|HyS0004.366	XP_004205906.1 PREDICTED: muscarinic acetylcholine receptor M3-like [Hydra vulgaris]	3.8e-28	Class a rhodopsin g-protein coupled receptor gprsif (Fragment)	NA	neuropeptide Y receptor activity	neuropeptide signaling pathway	integral component of plasma membrane
Hsym|HyS0004.367	XP_004205906.1 PREDICTED: muscarinic acetylcholine receptor M3-like [Hydra vulgaris]	2.3e-66	NA	NA	NA	NA	NA
Hsym|HyS0004.368	XP_019621962.1 PREDICTED: cysteine synthase 1-like [Branchiostoma belcheri]	1.5e-136	Pyridoxal-5'-phosphate-dependent protein beta subunit	NA	cysteine synthase activity	cysteine biosynthetic process from serine	cytoplasm
Hsym|HyS0004.370	XP_012562595.1 PREDICTED: uncharacterized protein LOC100197232 [Hydra vulgaris]	3.6e-12	NA	NA	NA	NA	NA
Hsym|HyS0004.371	XP_027042935.1 kynurenine formamidase-like [Pocillopora damicornis]	4.2e-49	Kynurenine formamidase	NA	arylformamidase activity	tryptophan catabolic process to kynurenine	NA
Hsym|HyS0004.372	XP_002154007.1 PREDICTED: endochitinase 4-like [Hydra vulgaris]	6.6e-182	Glycoside hydrolase	CHN50	chitinase activity	chitin catabolic process	integral component of membrane
Hsym|HyS0004.373	XP_002154007.1 PREDICTED: endochitinase 4-like [Hydra vulgaris]	2.3e-214	Glycoside hydrolase	CHN50	chitinase activity	chitin catabolic process	integral component of membrane
Hsym|HyS0004.375	RXG56460.1 Protein kinase C-binding protein NELL2 [Armadillidium vulgare]	1e-09	EGF-like domain-containing protein	NA	calcium ion binding	NA	NA
Hsym|HyS0004.376	XP_002161668.2 PREDICTED: 60S ribosomal protein L23-like [Hydra vulgaris]	4.9e-67	60S ribosomal protein L23 (inferred by orthology to a C. elegans protein)	RPL-23	structural constituent of ribosome	translation	ribosome
Hsym|HyS0004.377	XP_004210457.1 PREDICTED: carbohydrate deacetylase-like [Hydra vulgaris]	5.5e-55	Carbohydrate deacetylase	NA	deacetylase activity	carbohydrate metabolic process	integral component of membrane
Hsym|HyS0004.378	XP_015761416.1 PREDICTED: ZP domain-containing protein-like isoform X1 [Acropora digitifera]	6.3e-29	NA	NA	NA	NA	NA
Hsym|HyS0004.379	XP_002166700.2 PREDICTED: 39S ribosomal protein L2, mitochondrial-like [Hydra vulgaris]	1e-95	Selenoprotein O	RPLB	structural constituent of ribosome	translation	large ribosomal subunit
Hsym|HyS0004.380	XP_012566984.1 PREDICTED: condensin complex subunit 1-like [Hydra vulgaris]	0	Condensin complex subunit	NCAPD2	histone binding	mitotic chromosome condensation	nucleus
Hsym|HyS0004.381	XP_022785892.1 CDGSH iron-sulfur domain-containing protein 3, mitochondrial-like [Stylophora pistillata]	1.5e-13	Glutamate synthase NADPH large chain	NA	2 iron, 2 sulfur cluster binding	glutamate biosynthetic process	intracellular membrane-bounded organelle
Hsym|HyS0004.382	XP_028398321.1 tubulin polyglutamylase TTLL4-like isoform X1 [Dendronephthya gigantea]	2e-189	Tubulin tyrosine ligase like 4	TTLL4	ATP binding	protein polyglutamylation	NA
Hsym|HyS0004.383	XP_027054680.1 uncharacterized protein LOC113681758 [Pocillopora damicornis]	3.6e-05	NA	NA	NA	NA	NA
Hsym|HyS0004.384	XP_022791513.1 gamma-aminobutyric acid receptor subunit beta-3-like [Stylophora pistillata]	1.9e-116	gamma-aminobutyric acid receptor subunit beta	NA	extracellular ligand-gated ion channel activity	ion transmembrane transport	plasma membrane
Hsym|HyS0004.385	XP_022791513.1 gamma-aminobutyric acid receptor subunit beta-3-like [Stylophora pistillata]	2.5e-116	gamma-aminobutyric acid receptor subunit beta	NA	extracellular ligand-gated ion channel activity	ion transmembrane transport	plasma membrane
Hsym|HyS0004.387	XP_027049013.1 gamma-aminobutyric acid receptor subunit beta-1-like [Pocillopora damicornis]	8.1e-62	Gamma-aminobutyric acid receptor subunit beta-1 (Fragment)	NA	extracellular ligand-gated ion channel activity	gamma-aminobutyric acid signaling pathway	neuron projection
Hsym|HyS0004.388	VDO03933.1 unnamed protein product [Hymenolepis nana]	0.00041	NA	NA	NA	NA	NA
Hsym|HyS0004.389	XP_020600813.1 atrial natriuretic peptide receptor 1-like isoform X2 [Orbicella faveolata]	2.2e-124	Atrial natriuretic peptide receptor (Fragment)	NA	protein kinase activity	protein phosphorylation	NA
Hsym|HyS0004.391	XP_004208164.2 PREDICTED: uridine phosphorylase 2-like [Hydra vulgaris]	5.5e-84	Uridine phosphorylase	UPP1	uridine phosphorylase activity	pyrimidine ribonucleotide salvage	cytoplasm
Hsym|HyS0004.392	XP_002168361.3 PREDICTED: cyclin-dependent-like kinase 5 [Hydra vulgaris]	2.4e-151	Cell division protein kinase	CDK5	protein serine/threonine kinase activity	protein phosphorylation	lamellipodium
Hsym|HyS0004.393	XP_004207483.1 PREDICTED: lysine histidine transporter-like 4 [Hydra vulgaris]	8.9e-25	NA	NA	NA	NA	NA
Hsym|HyS0004.395	CAJ80765.2 thrombospondin type 1 repeat-containing protein 2 precursor [Hydra vulgaris]	1.7e-240	Thrombospondin type 1 repeat-containing protein 2	HMCN1	calcium ion binding	negative regulation of peptidase activity	extracellular region
Hsym|HyS0004.396	ABD95939.1 rhamnospondin 1 [Hydractinia symbiolongicarpus]	0	Thrombospondin type 1 repeat-containing protein 2	NA	carbohydrate binding	chitin metabolic process	integral component of membrane
Hsym|HyS0004.397	XP_002156698.1 PREDICTED: kelch-like protein 18 [Hydra vulgaris]	7.7e-138	Actin-binding protein IPP	KLHL18	NA	positive regulation of mitotic cell cycle phase transition	Cul3-RING ubiquitin ligase complex
Hsym|HyS0004.398	XP_012555852.1 PREDICTED: glutamic acid-rich protein-like [Hydra vulgaris]	4e-20	NA	NA	NA	NA	NA
Hsym|HyS0004.399	XP_004211306.2 PREDICTED: coiled-coil domain-containing protein 12-like [Hydra vulgaris]	8.2e-26	Coiled-coil domain-containing protein 12	CCDC12	NA	NA	post-mRNA release spliceosomal complex
Hsym|HyS0004.400	XP_012564418.1 PREDICTED: potassium voltage-gated channel subfamily KQT member 1-like [Hydra vulgaris]	5.9e-64	Putative Potassium voltage-gated channel subfamily KQT member	NA	voltage-gated potassium channel activity	potassium ion transmembrane transport	voltage-gated potassium channel complex
Hsym|HyS0004.401	XP_012558974.1 PREDICTED: uncharacterized protein LOC100203068 isoform X1 [Hydra vulgaris]	5.3e-73	NA	NA	NA	NA	NA
Hsym|HyS0004.402	XP_002168694.3 PREDICTED: vesicular GABA transporter-like [Hydra vulgaris]	3.6e-78	NA	NA	NA	NA	NA
Hsym|HyS0004.403	XP_002168694.3 PREDICTED: vesicular GABA transporter-like [Hydra vulgaris]	6.3e-91	NA	NA	NA	NA	NA
Hsym|HyS0004.404	XP_002168694.3 PREDICTED: vesicular GABA transporter-like [Hydra vulgaris]	3.3e-92	NA	NA	NA	NA	NA
Hsym|HyS0004.406	XP_001636247.1 predicted protein [Nematostella vectensis]	2.5e-06	NA	NA	NA	NA	NA
Hsym|HyS0004.407	XP_002163037.2 PREDICTED: translational activator of cytochrome c oxidase 1-like [Hydra vulgaris]	1.1e-79	Translational activator of cytochrome c oxidase 1	NA	NA	NA	NA
Hsym|HyS0004.409	XP_013392820.1 uncharacterized protein LOC106160699 [Lingula anatina]	7.7e-15	NA	NA	NA	NA	NA
Hsym|HyS0004.410	XP_009052966.1 hypothetical protein LOTGIDRAFT_174858 [Lottia gigantea]	9.4e-21	NA	NA	NA	NA	NA
Hsym|HyS0004.411	XP_004210018.1 PREDICTED: low-density lipoprotein receptor-like isoform X2 [Hydra vulgaris]	4.8e-92	Very low density lipoprotein receptor	LRP4	calcium ion binding	positive regulation of presynaptic membrane organization	neuromuscular junction
Hsym|HyS0004.412	XP_002156829.1 PREDICTED: crystallin J1A-like [Hydra vulgaris]	4e-94	NA	NA	NA	NA	NA
Hsym|HyS0004.413	XP_004211180.2 PREDICTED: mediator of RNA polymerase II transcription subunit 1-like [Hydra vulgaris]	2.3e-134	NA	NA	NA	NA	NA
Hsym|HyS0004.414	XP_002168751.1 PREDICTED: fas apoptotic inhibitory molecule 1-like [Hydra vulgaris]	1.5e-71	Fas apoptotic inhibitory molecule a	FAIM	NA	negative regulation of apoptotic process	integral component of membrane
Hsym|HyS0004.415	XP_012557874.1 PREDICTED: protein saal1-like [Hydra vulgaris]	4.6e-60	NA	NA	NA	NA	NA
Hsym|HyS0004.416	XP_002156368.1 PREDICTED: zinc finger HIT domain-containing protein 1-like [Hydra vulgaris]	8.6e-60	Zinc finger HIT domain-containing protein 1	NA	metal ion binding	histone exchange	Swr1 complex
Hsym|HyS0004.417	XP_002156336.1 PREDICTED: 26S proteasome complex subunit DSS1-like [Hydra vulgaris]	1.4e-13	Angiotensin-converting enzyme	NA	peptidyl-dipeptidase activity	proteasome assembly	proteasome regulatory particle, lid subcomplex
Hsym|HyS0004.418	XP_012566616.1 PREDICTED: THAP domain-containing protein 4-like, partial [Hydra vulgaris]	5.3e-17	Cyclin-dependent kinase 2 associated protein 2	NA	DNA binding	oxidation-reduction process	nucleus
Hsym|HyS0004.419	XP_012562887.1 PREDICTED: uncharacterized protein LOC105847697 [Hydra vulgaris]	2.9e-99	NA	NA	NA	NA	NA
Hsym|HyS0004.420	XP_002161861.1 PREDICTED: disks large-associated protein 4-like [Hydra vulgaris]	1.8e-40	Disks large-associated protein 4	NA	NA	signaling	synapse
Hsym|HyS0004.421	XP_027048974.1 dynein heavy chain domain-containing protein 1-like [Pocillopora damicornis]	0	NA	NA	NA	NA	NA
Hsym|HyS0004.422	RNA10670.1 hypothetical protein BpHYR1_026962 [Brachionus plicatilis]	2.3e-06	NA	NA	NA	NA	NA
Hsym|HyS0004.423	ACY74438.1 ATP synthase H+ transporting-like protein [Carukia barnesi]	3.7e-32	Atp synthase f complex subunit mitochondrial	NA	lipid binding	energy coupled proton transport, down electrochemical gradient	proton-transporting ATP synthase complex, coupling factor F(o)
Hsym|HyS0004.424	XP_020607720.1 uncharacterized protein LOC110046367 isoform X2 [Orbicella faveolata]	4.4e-35	NA	NA	NA	NA	NA
Hsym|HyS0004.425	XP_015755057.1 PREDICTED: elongator complex protein 6-like [Acropora digitifera]	3.3e-37	NA	NA	NA	NA	NA
Hsym|HyS0004.426	KIH52177.1 EGF-like domain protein, partial [Ancylostoma duodenale]	7.8e-06	Metabotropic glutamate receptor	NA	calcium ion binding	Notch signaling pathway	CSL-Notch-Mastermind transcription factor complex
Hsym|HyS0004.427	XP_002155008.2 PREDICTED: very-long-chain 3-oxoacyl-CoA reductase-like [Hydra vulgaris]	1.9e-68	Inactive hydroxysteroid dehydrogenase protein 1	NA	oxidoreductase activity	oxidation-reduction process	endoplasmic reticulum
Hsym|HyS0004.428	XP_002155008.2 PREDICTED: very-long-chain 3-oxoacyl-CoA reductase-like [Hydra vulgaris]	5.4e-63	Very-long-chain 3-oxoacyl-CoA reductase	NA	ketoreductase activity	fatty acid elongation	endoplasmic reticulum
Hsym|HyS0004.429	XP_002166866.3 PREDICTED: grpE protein homolog 1, mitochondrial-like [Hydra vulgaris]	3.1e-44	GrpE protein homolog 1, mitochondrial	GRPEL1	adenyl-nucleotide exchange factor activity	protein folding	mitochondrial matrix
Hsym|HyS0004.430	XP_004208440.1 PREDICTED: uncharacterized protein LOC101239547 [Hydra vulgaris]	7.4e-105	N-acetyltransferase 6	NA	N-acetyltransferase activity	NA	NA
Hsym|HyS0004.431	XP_004205531.1 PREDICTED: WD repeat-containing protein 75-like [Hydra vulgaris]	1.4e-148	WD repeat-containing protein 75 (Fragment)	NA	NA	NA	NA
Hsym|HyS0004.432	XP_012560802.1 PREDICTED: nostrin-like [Hydra vulgaris]	7.7e-97	SH3 domain-containing protein	NA	actin filament binding	positive regulation of dendritic spine morphogenesis	actin filament
Hsym|HyS0004.433	XP_012554909.1 PREDICTED: integrin alpha-7-like [Hydra vulgaris]	1.5e-246	Integrin subunit alpha 7	NA	NA	integrin-mediated signaling pathway	integrin complex
Hsym|HyS0004.434	XP_028404503.1 major facilitator superfamily domain-containing protein 6-like [Dendronephthya gigantea]	1.2e-09	NA	NA	NA	NA	NA
Hsym|HyS0004.435	VDP73451.1 unnamed protein product [Echinostoma caproni]	2.2e-06	NA	NA	NA	NA	NA
Hsym|HyS0004.436	XP_020914878.1 uncharacterized protein LOC110252397 [Exaiptasia pallida]	4.8e-21	NA	NA	NA	NA	NA
Hsym|HyS0004.437	XP_004207483.1 PREDICTED: lysine histidine transporter-like 4 [Hydra vulgaris]	3.1e-25	NA	NA	NA	NA	NA
Hsym|HyS0004.438	XP_012555041.1 PREDICTED: uncharacterized protein LOC100209306 [Hydra vulgaris]	9.8e-14	NA	NA	NA	NA	NA
Hsym|HyS0004.439	OBS65143.1 hypothetical protein A6R68_06303, partial [Neotoma lepida]	4.4e-05	NA	NA	NA	NA	NA
Hsym|HyS0004.440	RNA10356.1 insulin-like growth factor-binding complex acid labile subunit [Brachionus plicatilis]	0.00027	Protein kinase domain-containing protein	NA	protein serine/threonine kinase activity	protein phosphorylation	integral component of membrane
Hsym|HyS0004.442	XP_020626127.1 uncharacterized protein LOC110063481 [Orbicella faveolata]	3.5e-86	Ankyrin repeat and protein kinase domain-containing protein 1	NA	kinase activity	phosphorylation	NA
Hsym|HyS0004.443	XP_012562856.1 PREDICTED: uncharacterized protein LOC101239750, partial [Hydra vulgaris]	0	Discoidin domain receptor tyrosine kinase 2	NA	protein tyrosine kinase collagen receptor activity	cell adhesion	receptor complex
Hsym|HyS0004.445	XP_012560049.1 PREDICTED: gamma-aminobutyric acid receptor subunit beta-2-like isoform X1 [Hydra vulgaris]	1e-95	Gamma-aminobutyric acid receptor subunit beta-2 (Fragment)	NA	extracellular ligand-gated ion channel activity	ion transmembrane transport	plasma membrane
Hsym|HyS0004.446	XP_004206639.2 PREDICTED: mucin-5AC-like [Hydra vulgaris]	0	Eukaryotic aspartyl protease	NA	chitin binding	chitin metabolic process	extracellular region
Hsym|HyS0004.447	XP_002166134.2 PREDICTED: tetraspanin-31-like [Hydra vulgaris]	4.7e-56	NA	NA	NA	NA	NA
Hsym|HyS0004.448	XP_004208137.1 PREDICTED: ras-related protein Ral-A-like [Hydra vulgaris]	7.5e-85	RAS like proto-oncogene A	RALA	GTPase activity	Ras protein signal transduction	cleavage furrow
Hsym|HyS0004.449	KXJ18352.1 hypothetical protein AC249_AIPGENE28098 [Exaiptasia pallida]	1.5e-16	THAP-type domain-containing protein	NA	DNA binding	NA	NA
Hsym|HyS0004.450	XP_004208137.1 PREDICTED: ras-related protein Ral-A-like [Hydra vulgaris]	4.9e-71	RAS like proto-oncogene B	NA	GTPase activity	Ras protein signal transduction	plasma membrane
Hsym|HyS0004.451	XP_012555638.1 PREDICTED: ETS domain-containing protein Elk-3-like [Hydra vulgaris]	0.00089	NA	NA	NA	NA	NA
Hsym|HyS0004.453	XP_022784487.1 ETS-related transcription factor Elf-1-like [Stylophora pistillata]	1.3e-16	Ets DNA-binding protein pokkuri	NA	sequence-specific DNA binding	cell fate determination	nucleus
Hsym|HyS0004.454	XP_012561462.1 PREDICTED: probable G-protein coupled receptor 133 isoform X1 [Hydra vulgaris]	7.9e-34	NA	NA	NA	NA	NA
Hsym|HyS0004.455	XP_004205507.1 PREDICTED: uncharacterized protein LOC101239808 isoform X1 [Hydra vulgaris]	2.9e-92	Putative RNA-directed DNA polymerase from transposon X-element	NA	RNA-directed DNA polymerase activity	RNA-dependent DNA biosynthetic process	integral component of membrane
Hsym|HyS0004.456	XP_020631129.1 E3 ubiquitin-protein ligase SHPRH-like [Orbicella faveolata]	2.3e-250	SNF2 histone linker PHD RING helicase	SHPRH	ATP binding	nucleosome assembly	nucleosome
Hsym|HyS0004.457	XP_027044868.1 amiloride-sensitive sodium channel subunit alpha-like [Pocillopora damicornis]	2.3e-50	NA	NA	NA	NA	NA
Hsym|HyS0004.458	XP_027044868.1 amiloride-sensitive sodium channel subunit alpha-like [Pocillopora damicornis]	2.1e-51	NA	NA	NA	NA	NA
Hsym|HyS0004.459	XP_012566680.1 PREDICTED: uncharacterized protein LOC105850818, partial [Hydra vulgaris]	5.6e-21	NA	NA	NA	NA	NA
Hsym|HyS0004.460	XP_012558731.1 PREDICTED: uncharacterized protein LOC105845472 [Hydra vulgaris]	2.3e-25	NA	NA	NA	NA	NA
Hsym|HyS0004.461	XP_012558938.1 PREDICTED: integrator complex subunit 1-like [Hydra vulgaris]	0	Integrator complex subunit 1	INTS1	carbohydrate binding	U2 snRNA 3'-end processing	integrator complex
Hsym|HyS0004.462	XP_012560548.1 PREDICTED: uncharacterized protein LOC100210878 isoform X1 [Hydra vulgaris]	1.2e-299	NA	NA	NA	NA	NA
Hsym|HyS0004.464	XP_012558536.1 PREDICTED: putative uncharacterized protein DDB_G0274535 [Hydra vulgaris]	3.1e-05	NA	NA	NA	NA	NA
Hsym|HyS0004.465	XP_012562214.1 PREDICTED: WAS/WASL-interacting protein family member 1-like [Hydra vulgaris]	2.3e-05	Wiskott-Aldrich syndrome protein (WASP)-Interacting Protein and gene assignment	NA	actin binding	actin cortical patch assembly	actin cortical patch
Hsym|HyS0004.466	XP_002157134.2 PREDICTED: glycine--tRNA ligase-like [Hydra vulgaris]	2.4e-310	Glycyl-tRNA synthetase	GARS	glycine-tRNA ligase activity	glycyl-tRNA aminoacylation	cytoplasm
Hsym|HyS0004.467	XP_002157468.2 PREDICTED: uncharacterized protein LOC100209184 [Hydra vulgaris]	1.4e-35	NA	NA	NA	NA	NA
Hsym|HyS0004.471	ALJ33557.1 Hlh-4 [Clytia hemisphaerica]	3.3e-23	Transcription factor 15	NA	protein dimerization activity	NA	NA
Hsym|HyS0004.472	ALJ33557.1 Hlh-4 [Clytia hemisphaerica]	1.4e-19	Helix-loop-helix DNA-binding domain protein	NA	protein dimerization activity	NA	NA
Hsym|HyS0004.473	XP_012559925.1 PREDICTED: uncharacterized protein LOC101239796 [Hydra vulgaris]	1.6e-89	NA	NA	NA	NA	NA
Hsym|HyS0004.475	XP_011402856.2 PREDICTED: ankyrin-3-like [Amphimedon queenslandica]	1.3e-71	Protein ACCELERATED CELL DEATH 6 (Fragment)	NA	catalytic activity	nucleoside metabolic process	integral component of membrane
Hsym|HyS0004.476	XP_011678463.1 PREDICTED: LOW QUALITY PROTEIN: uncharacterized protein LOC105445094 [Strongylocentrotus purpuratus]	5.9e-113	SET domain containing (Lysine methyltransferase) (Fragment)	LOC108267344	methyltransferase activity	methylation	NA
Hsym|HyS0004.479	XP_008921518.1 SOSS complex subunit C isoform X1 [Manacus vitellinus]	9.5e-07	SOSS complex subunit C	INIP	NA	DNA repair	SOSS complex
Hsym|HyS0004.480	XP_027041765.1 uncharacterized protein LOC113669885 [Pocillopora damicornis]	1.5e-75	NA	NA	NA	NA	NA
Hsym|HyS0004.482	XP_020630642.1 uncharacterized protein LOC110067639 [Orbicella faveolata]	1.5e-19	NA	NA	NA	NA	NA
Hsym|HyS0004.483	XP_002163988.1 PREDICTED: asparagine synthetase [glutamine-hydrolyzing]-like [Hydra vulgaris]	2.7e-208	Asparagine synthetase glutamine-hydrolyzing	ASNS	asparagine synthase (glutamine-hydrolyzing) activity	asparagine biosynthetic process	cytosol
Hsym|HyS0004.484	XP_002166619.3 PREDICTED: zinc transporter ZIP6-like [Hydra vulgaris]	1.4e-131	Zinc transporter foi	SLC39A6	metal ion transmembrane transporter activity	metal ion transport	lamellipodium membrane
Hsym|HyS0004.485	AAC23588.1 cyclic GMP-dependent protein kinase [Hydra oligactis]	4.2e-271	cGMP-dependent protein kinase	EGL-4	cGMP-dependent protein kinase activity	protein phosphorylation	cytosol
Hsym|HyS0004.486	XP_012558789.1 PREDICTED: uncharacterized protein LOC100203986 [Hydra vulgaris]	8.6e-118	Lysozyme	NA	NA	NA	integral component of membrane
Hsym|HyS0004.487	XP_012556924.1 PREDICTED: major facilitator superfamily domain-containing protein 6-like [Hydra vulgaris]	6.2e-187	Major facilitator superfamily domain-containing protein 6	NA	NA	NA	integral component of membrane
Hsym|HyS0004.488	XP_002165694.2 PREDICTED: checkpoint protein HUS1-like isoform X1 [Hydra vulgaris]	8.6e-103	Mitotic and DNA damage checkpoint protein hus1 (Fragment)	NA	kinase activity	DNA damage checkpoint	checkpoint clamp complex
Hsym|HyS0004.489	PFX24035.1 hypothetical protein AWC38_SpisGene11374 [Stylophora pistillata]	3.1e-13	NA	NA	NA	NA	NA
Hsym|HyS0004.490	XP_021342717.1 putative gamma-glutamylcyclotransferase CG2811 [Mizuhopecten yessoensis]	2.3e-13	Putative troponin c-akin-1	NA	gamma-glutamylaminecyclotransferase activity	NA	NA
Hsym|HyS0004.491	XP_002160979.1 PREDICTED: phosphatidylglycerophosphatase and protein-tyrosine phosphatase 1-like [Hydra vulgaris]	1.6e-42	Phosphatidylglycerophosphatase and protein-tyrosine phosphatase 1	PTPMT1	protein tyrosine/serine/threonine phosphatase activity	peptidyl-tyrosine dephosphorylation	mitochondrial membrane part
Hsym|HyS0004.492	XP_028414895.1 uncharacterized protein LOC114537981 isoform X2 [Dendronephthya gigantea]	2.6e-49	Integrase catalytic domain-containing protein	NA	nucleic acid binding	DNA integration	NA
Hsym|HyS0004.493	XP_004211210.2 PREDICTED: CWF19-like protein 1 [Hydra vulgaris]	7.4e-177	Inhibitor of nuclear factor kappa-B kinase subunit alpha	CWF19L1	RNA lariat debranching enzyme activator activity	positive regulation of catalytic activity	post-mRNA release spliceosomal complex
Hsym|HyS0004.494	XP_002157070.1 PREDICTED: charged multivesicular body protein 5-like [Hydra vulgaris]	5.8e-70	Charged multivesicular body protein 5	CHMP5	NA	vacuolar transport	endosome membrane
Hsym|HyS0004.496	XP_013778017.1 protein Wnt-7b-like [Limulus polyphemus]	1.9e-14	NA	NA	NA	NA	NA
Hsym|HyS0004.497	XP_013388158.1 uncharacterized protein LOC106157175 [Lingula anatina]	2.6e-12	NA	NA	NA	NA	NA
Hsym|HyS0004.498	XP_012561602.1 PREDICTED: uncharacterized protein LOC101237375 [Hydra vulgaris]	4.3e-29	NA	NA	NA	NA	NA
Hsym|HyS0004.499	XP_012561602.1 PREDICTED: uncharacterized protein LOC101237375 [Hydra vulgaris]	3.9e-30	NA	NA	NA	NA	NA
Hsym|HyS0004.500	XP_002155693.3 PREDICTED: tigger transposable element-derived protein 4-like [Hydra vulgaris]	1.4e-18	NA	NA	NA	NA	NA
Hsym|HyS0004.501	XP_002162910.3 PREDICTED: zinc transporter ZIP10-like [Hydra vulgaris]	6.4e-118	Zinc transporter foi	NA	metal ion transmembrane transporter activity	metal ion transport	integral component of membrane
Hsym|HyS0004.502	XP_002162910.3 PREDICTED: zinc transporter ZIP10-like [Hydra vulgaris]	6.4e-129	Zinc transporter foi	NA	metal ion transmembrane transporter activity	metal ion transport	perinuclear region of cytoplasm
Hsym|HyS0004.503	XP_012558988.1 PREDICTED: WD repeat-containing protein 60-like [Hydra vulgaris]	1.1e-179	WD repeat-containing protein 60 (Fragment)	NA	transcription coregulator activity	regulation of transcription by RNA polymerase II	mediator complex
Hsym|HyS0004.505	XP_012554415.1 PREDICTED: uncharacterized protein LOC100202641 [Hydra vulgaris]	3.3e-125	Brain-specific angiogenesis inhibitor 1	NA	G protein-coupled receptor activity	negative regulation of angiogenesis	extracellular space
Hsym|HyS0004.506	XP_012553532.1 PREDICTED: bifunctional purine biosynthesis protein PURH [Hydra vulgaris]	4.8e-236	Phosphoribosylaminoimidazolecarboxamide formyltransferase / IMP cyclohydrolase	ATIC	phosphoribosylaminoimidazolecarboxamide formyltransferase activity	purine nucleotide biosynthetic process	cytosol
Hsym|HyS0004.507	XP_012559978.1 PREDICTED: uncharacterized protein LOC100211175, partial [Hydra vulgaris]	1.1e-184	NA	NA	NA	NA	NA
Hsym|HyS0004.508	XP_002160070.1 PREDICTED: GDP-fucose protein O-fucosyltransferase 2-like [Hydra vulgaris]	2e-159	GDP-fucose protein O-fucosyltransferase 2	POFUT2	transferase activity, transferring glycosyl groups	fucose metabolic process	Golgi apparatus
[truncated: 15,739 more rows]

## Sheet: hech_combined_annotations
gene_id	best_BLAST_hit	eval	pannzer_description	pannzer_gene_name	molecular_function	biological_processes	cellular_component
Hech|HyE0001.3	OWF37631.1 Vacuolar amino acid transporter 1 [Mizuhopecten yessoensis]	5.8e-05	NA	NA	NA	NA	NA
Hech|HyE0001.4	XP_002164803.1 PREDICTED: vesicular inhibitory amino acid transporter-like [Hydra vulgaris]	9.2e-22	NA	NA	NA	NA	NA
Hech|HyE0001.5	XP_004209901.2 PREDICTED: ceramide synthase 6-like [Hydra vulgaris]	2.2e-100	Ceramide synthetase	NA	DNA binding	ceramide biosynthetic process	nucleus
Hech|HyE0001.6	XP_006815518.1 PREDICTED: uncharacterized protein LOC100374871 [Saccoglossus kowalevskii]	1.3e-22	NA	NA	NA	NA	NA
Hech|HyE0001.7	ELT90404.1 hypothetical protein CAPTEDRAFT_202281 [Capitella teleta]	2.3e-19	NA	NA	NA	NA	NA
Hech|HyE0001.8	XP_002164803.1 PREDICTED: vesicular inhibitory amino acid transporter-like [Hydra vulgaris]	1.6e-21	NA	NA	NA	NA	NA
Hech|HyE0001.11	XP_001639977.1 predicted protein [Nematostella vectensis]	2.2e-16	NA	NA	NA	NA	NA
Hech|HyE0001.12	XP_012564936.1 PREDICTED: glycoprotein 3-alpha-L-fucosyltransferase A-like [Hydra vulgaris]	1.6e-177	Alpha-(1,3)-fucosyltransferase C	NA	fucosyltransferase activity	fucosylation	Golgi cisterna membrane
Hech|HyE0001.13	XP_002160445.1 PREDICTED: coiled-coil domain-containing protein 47-like [Hydra vulgaris]	3.9e-153	Histone-lysine N-methyltransferase	MED8	transcription coregulator activity	regulation of transcription by RNA polymerase II	mediator complex
Hech|HyE0001.14	XP_012566964.1 PREDICTED: prostaglandin E synthase 3-like [Hydra vulgaris]	1.8e-47	Cytosolic prostaglandin-E synthase	NA	Hsp90 protein binding	chaperone-mediated protein complex assembly	cytosol
Hech|HyE0001.15	RMX59825.1 hypothetical protein pdam_00007343 [Pocillopora damicornis]	1.2e-35	plasminogen	NA	serine-type endopeptidase activity	proteolysis	membrane
Hech|HyE0001.16	XP_012563823.1 PREDICTED: uncharacterized protein LOC105848313 [Hydra vulgaris]	5.1e-29	NA	NA	NA	NA	NA
Hech|HyE0001.17	XP_002168723.1 PREDICTED: COMM domain-containing protein 3-like [Hydra vulgaris]	4.9e-49	COMM domain-containing protein 3	COMMD3	protein binding	sodium ion transport	ficolin-1-rich granule
Hech|HyE0001.19	XP_002162013.1 PREDICTED: tRNA wybutosine-synthesizing protein 4-like [Hydra vulgaris]	1.7e-149	tRNA wybutosine-synthesizing protein 4	NA	methyltransferase activity	methylation	cytosol
Hech|HyE0001.20	XP_002162137.2 PREDICTED: leucine-rich repeat-containing protein 45-like [Hydra vulgaris]	9.9e-86	Leucine-rich repeat-containing protein 45	NA	NA	NA	NA
Hech|HyE0001.22	XP_002165738.1 PREDICTED: probable acyl-CoA dehydrogenase 6 [Hydra vulgaris]	3.7e-174	Guanine nucleotide-binding protein subunit gamma	NA	acyl-CoA dehydrogenase activity	oxidation-reduction process	heterotrimeric G-protein complex
Hech|HyE0001.23	RNA06753.1 hypothetical protein BpHYR1_019344 [Brachionus plicatilis]	1.4e-32	UDP-N-acetylglucosamine-peptide N-acetylglucosaminyltransferase	NA	transferase activity, transferring glycosyl groups	NA	integral component of membrane
Hech|HyE0001.24	RNA36727.1 hypothetical protein BpHYR1_050669 [Brachionus plicatilis]	9.3e-31	NA	NA	NA	NA	NA
Hech|HyE0001.25	XP_013412477.1 neurexin-4 [Lingula anatina]	1.3e-23	Contactin-associated protein 1 (Fragment)	NA	extracellular matrix structural constituent	NA	NA
Hech|HyE0001.26	XP_002164362.1 PREDICTED: general transcription factor 3C polypeptide 5-like [Hydra vulgaris]	2.3e-130	Small glutamine-rich tetratricopeptide repeat-containing protein alpha	NA	NA	positive regulation of chaperone-mediated protein folding	TRC complex
Hech|HyE0001.27	XP_002604137.1 hypothetical protein BRAFLDRAFT_113999 [Branchiostoma floridae]	8.5e-90	Superoxide dismutase	NA	superoxide dismutase activity	removal of superoxide radicals	mitochondrion
Hech|HyE0001.29	XP_002164443.2 PREDICTED: 3-hydroxyisobutyryl-CoA hydrolase, mitochondrial-like [Hydra vulgaris]	4.7e-121	3-hydroxyisobutyryl-CoA hydrolase, mitochondrial	HIBCH	3-hydroxyisobutyryl-CoA hydrolase activity	valine catabolic process	mitochondrion
Hech|HyE0001.32	XP_027901395.1 uncharacterized protein LOC114161925 [Xiphophorus couchianus]	8.5e-29	NA	NA	NA	NA	NA
Hech|HyE0001.33	XP_012557078.1 PREDICTED: uncharacterized protein LOC105844710 [Hydra vulgaris]	8.2e-27	NA	NA	NA	NA	NA
Hech|HyE0001.34	XP_027901395.1 uncharacterized protein LOC114161925 [Xiphophorus couchianus]	1.4e-28	NA	NA	NA	NA	NA
Hech|HyE0001.37	XP_002164443.2 PREDICTED: 3-hydroxyisobutyryl-CoA hydrolase, mitochondrial-like [Hydra vulgaris]	4.1e-124	3-hydroxyisobutyryl-CoA hydrolase, mitochondrial	HIBCH	3-hydroxyisobutyryl-CoA hydrolase activity	valine catabolic process	mitochondrion
Hech|HyE0001.39	XP_002604137.1 hypothetical protein BRAFLDRAFT_113999 [Branchiostoma floridae]	3.8e-90	Superoxide dismutase	NA	superoxide dismutase activity	removal of superoxide radicals	mitochondrion
Hech|HyE0001.40	XP_002164362.1 PREDICTED: general transcription factor 3C polypeptide 5-like [Hydra vulgaris]	1.4e-55	General transcription factor 3C polypeptide 5	NA	NA	transcription initiation from RNA polymerase III promoter	transcription factor TFIIIC complex
Hech|HyE0001.41	XP_002157315.3 PREDICTED: small glutamine-rich tetratricopeptide repeat-containing protein alpha-like [Hydra vulgaris]	3.3e-55	Small glutamine-rich tetratricopeptide repeat-containing protein alpha	NA	NA	positive regulation of chaperone-mediated protein folding	TRC complex
Hech|HyE0001.42	XP_013412477.1 neurexin-4 [Lingula anatina]	2.4e-24	NA	NA	NA	NA	NA
Hech|HyE0001.43	RNA36727.1 hypothetical protein BpHYR1_050669 [Brachionus plicatilis]	2.7e-30	NA	NA	NA	NA	NA
Hech|HyE0001.44	RNA06753.1 hypothetical protein BpHYR1_019344 [Brachionus plicatilis]	1.9e-32	UDP-N-acetylglucosamine-peptide N-acetylglucosaminyltransferase	NA	transferase activity, transferring glycosyl groups	NA	integral component of membrane
Hech|HyE0001.45	XP_002165738.1 PREDICTED: probable acyl-CoA dehydrogenase 6 [Hydra vulgaris]	3.8e-174	Guanine nucleotide-binding protein subunit gamma	NA	acyl-CoA dehydrogenase activity	oxidation-reduction process	heterotrimeric G-protein complex
Hech|HyE0001.47	XP_020603899.1 uncharacterized protein LOC110042858 [Orbicella faveolata]	6.1e-33	NA	NA	NA	NA	NA
Hech|HyE0001.48	XP_012553753.1 PREDICTED: stAR-related lipid transfer protein 3-like [Hydra vulgaris]	1.8e-122	StAR-related lipid transfer protein 3 (Fragment)	NA	lipid binding	NA	NA
Hech|HyE0001.50	XP_002159213.2 PREDICTED: keratin-associated protein 10-4-like isoform X2 [Hydra vulgaris]	2.1e-16	SpoIVD-associated factor A	NA	nutrient reservoir activity	regulation of gene expression	keratin filament
Hech|HyE0001.51	NP_001267819.1 cysteine rich BMP regulator 2 precursor [Hydra vulgaris]	4.6e-07	NA	NA	NA	NA	NA
Hech|HyE0001.53	XP_002162652.3 PREDICTED: tubulin gamma-1 chain [Hydra vulgaris]	1.7e-246	Tubulin gamma chain	NA	GTPase activity	cytoplasmic microtubule organization	gamma-tubulin complex
Hech|HyE0001.54	XP_012556922.1 PREDICTED: zinc finger protein 830-like [Hydra vulgaris]	1.5e-39	26S proteasome non-ATPase regulatory subunit 5	ZNF830	zinc ion binding	mitotic DNA replication checkpoint	spliceosomal complex
Hech|HyE0001.55	XP_002161134.1 PREDICTED: vacuolar-sorting protein SNF8-like [Hydra vulgaris]	1.3e-105	Vacuolar-sorting protein SNF8	SNF8	protein N-terminus binding	multivesicular body sorting pathway	ESCRT II complex
Hech|HyE0001.56	XP_012555714.1 PREDICTED: tRNA-dihydrouridine(47) synthase [NAD(P)(+)]-like [Hydra vulgaris]	1e-193	tRNA-dihydrouridine synthase	DUS3L	tRNA dihydrouridine synthase activity	tRNA dihydrouridine synthesis	NA
Hech|HyE0001.57	XP_012555714.1 PREDICTED: tRNA-dihydrouridine(47) synthase [NAD(P)(+)]-like [Hydra vulgaris]	2.2e-209	Dihydrouridine synthase 3-like (S. cerevisiae)	DUS3L	tRNA dihydrouridine synthase activity	tRNA dihydrouridine synthesis	NA
Hech|HyE0001.58	XP_002166703.1 PREDICTED: serine/threonine-protein phosphatase 6 regulatory ankyrin repeat subunit C-like [Hydra vulgaris]	3.8e-58	NA	NA	NA	NA	NA
Hech|HyE0001.59	XP_023654846.1 uncharacterized protein LOC111837208 [Paramormyrops kingsleyae]	1.1e-75	NA	NA	NA	NA	NA
Hech|HyE0001.60	XP_028391523.1 uncharacterized protein LOC114516291 isoform X1 [Dendronephthya gigantea]	4.8e-05	NA	NA	NA	NA	NA
Hech|HyE0001.61	XP_010897450.1 PREDICTED: uncharacterized protein LOC105027187 [Esox lucius]	1.9e-71	NA	NA	NA	NA	NA
Hech|HyE0001.62	XP_020895937.1 uncharacterized protein LOC110234869 [Exaiptasia pallida]	1.6e-23	NA	NA	NA	NA	NA
Hech|HyE0001.64	XP_028391523.1 uncharacterized protein LOC114516291 isoform X1 [Dendronephthya gigantea]	4e-14	NA	NA	NA	NA	NA
Hech|HyE0001.65	KXJ28186.1 Transposon Ty3-I Gag-Pol polyprotein [Exaiptasia pallida]	6.8e-39	NA	NA	NA	NA	NA
Hech|HyE0001.66	XP_019639904.1 PREDICTED: uncharacterized protein LOC109481749 [Branchiostoma belcheri]	1.1e-20	YqaJ domain-containing protein (Fragment)	NA	GTP binding	NA	NA
Hech|HyE0001.68	XP_028413811.1 uncharacterized protein LOC114536658 [Dendronephthya gigantea]	3.6e-09	NA	NA	NA	NA	NA
Hech|HyE0001.69	BAF82020.1 piggyBac transposase Uribo1 [Xenopus laevis]	2.3e-10	NA	NA	NA	NA	NA
Hech|HyE0001.70	XP_022180109.1 piggyBac transposable element-derived protein 4-like [Myzus persicae]	3.8e-28	PiggyBac transposable element-derived protein 1	PGBD1	DNA binding	NA	NA
Hech|HyE0001.71	XP_002162861.1 PREDICTED: uncharacterized protein LOC100209664 [Hydra vulgaris]	4.8e-06	NA	NA	NA	NA	NA
Hech|HyE0001.72	XP_019626268.1 PREDICTED: uncharacterized protein LOC109471422 [Branchiostoma belcheri]	1.4e-07	NA	NA	NA	NA	NA
Hech|HyE0001.73	XP_012563196.1 PREDICTED: tyrosyl-DNA phosphodiesterase 1-like [Hydra vulgaris]	2.9e-121	Tyrosyl-DNA phosphodiesterase	TDP1	phosphoric diester hydrolase activity	DNA repair	nucleus
Hech|HyE0001.74	XP_023696335.1 uncharacterized protein LOC111858638 [Paramormyrops kingsleyae]	1.3e-67	NA	NA	NA	NA	NA
Hech|HyE0001.75	XP_020895937.1 uncharacterized protein LOC110234869 [Exaiptasia pallida]	1.9e-29	NA	NA	NA	NA	NA
Hech|HyE0001.76	XP_028391523.1 uncharacterized protein LOC114516291 isoform X1 [Dendronephthya gigantea]	1.3e-09	NA	NA	NA	NA	NA
Hech|HyE0001.77	XP_028413811.1 uncharacterized protein LOC114536658 [Dendronephthya gigantea]	3.6e-09	NA	NA	NA	NA	NA
Hech|HyE0001.78	BAF82020.1 piggyBac transposase Uribo1 [Xenopus laevis]	7.6e-10	NA	NA	NA	NA	NA
Hech|HyE0001.79	XP_002162861.1 PREDICTED: uncharacterized protein LOC100209664 [Hydra vulgaris]	4.8e-06	NA	NA	NA	NA	NA
Hech|HyE0001.80	XP_012563196.1 PREDICTED: tyrosyl-DNA phosphodiesterase 1-like [Hydra vulgaris]	3.5e-157	Tyrosyl-DNA phosphodiesterase	TDP1	phosphoric diester hydrolase activity	DNA repair	nucleus
Hech|HyE0001.81	XP_012557028.1 PREDICTED: sorting nexin-13-like [Hydra vulgaris]	0	PX domain-containing protein (Fragment)	NA	phosphatidylinositol binding	positive regulation of GTPase activity	integral component of membrane
Hech|HyE0001.82	PFX22769.1 hypothetical protein AWC38_SpisGene12708 [Stylophora pistillata]	3.5e-12	NA	NA	NA	NA	NA
Hech|HyE0001.83	EKC27536.1 hypothetical protein CGI_10020163 [Crassostrea gigas]	9.9e-07	NA	NA	NA	NA	NA
Hech|HyE0001.86	XP_004208067.2 PREDICTED: uncharacterized protein LOC101238777 [Hydra vulgaris]	9.8e-163	NA	NA	NA	NA	NA
Hech|HyE0001.87	RMX42282.1 hypothetical protein pdam_00009839 [Pocillopora damicornis]	9.3e-114	tripartite motif-containing protein 66	NA	zinc ion binding	protein polyubiquitination	membrane
Hech|HyE0001.88	XP_012554991.1 PREDICTED: ATP-citrate synthase-like [Hydra vulgaris]	0	ATP-citrate synthase	NA	ATP citrate synthase activity	citrate metabolic process	cytoplasm
Hech|HyE0001.89	XP_002159276.3 PREDICTED: probable protein disulfide-isomerase A4 [Hydra vulgaris]	0	Thioredoxin	NA	isomerase activity	cell redox homeostasis	cell
Hech|HyE0001.90	XP_012560438.1 PREDICTED: uncharacterized protein LOC100200355 isoform X1 [Hydra vulgaris]	3.6e-134	NA	NA	NA	NA	NA
Hech|HyE0001.91	XP_012560438.1 PREDICTED: uncharacterized protein LOC100200355 isoform X1 [Hydra vulgaris]	1.8e-66	Latent-transforming growth factor beta-binding protein 4	NA	calcium ion binding	cell-matrix adhesion	extracellular region
Hech|HyE0001.92	XP_002157408.1 PREDICTED: WD repeat-containing protein 37-like [Hydra vulgaris]	1.7e-133	WD repeat-containing protein 37	WDR37	NA	NA	PeBoW complex
Hech|HyE0001.93	XP_022792049.1 polypeptide N-acetylgalactosaminyltransferase 13-like isoform X2 [Stylophora pistillata]	3.3e-176	Polypeptide N-acetylgalactosaminyltransferase	NA	carbohydrate binding	protein glycosylation	Golgi membrane
Hech|HyE0001.94	XP_012567195.1 PREDICTED: DNA-directed RNA polymerase I subunit RPA2 [Hydra vulgaris]	0	DNA-directed RNA polymerase subunit beta	POLR1B	DNA-directed 5'-3' RNA polymerase activity	transcription, DNA-templated	nucleus
Hech|HyE0001.95	XP_012554082.1 PREDICTED: 39S ribosomal protein L44, mitochondrial-like [Hydra vulgaris]	2.7e-80	39S ribosomal protein L44,mitochondrial	NA	ribonuclease III activity	RNA phosphodiester bond hydrolysis, endonucleolytic	ribosome
Hech|HyE0001.96	XP_002158890.1 PREDICTED: vesicle-trafficking protein SEC22a-like [Hydra vulgaris]	9.4e-77	Longin domain-containing protein (Fragment)	NA	SNAP receptor activity	vesicle-mediated transport	membrane
Hech|HyE0001.97	XP_004208332.1 PREDICTED: cyclin-dependent kinase 5 activator 1-like, partial [Hydra vulgaris]	5.2e-76	Cyclin-dependent kinase	NA	cyclin-dependent protein serine/threonine kinase activator activity	positive regulation of cyclin-dependent protein serine/threonine kinase activity	protein kinase 5 complex
Hech|HyE0001.98	XP_012559684.1 PREDICTED: uncharacterized protein LOC105845949 [Hydra vulgaris]	2.8e-12	NA	NA	NA	NA	NA
Hech|HyE0001.99	RMX39358.1 hypothetical protein pdam_00017918 [Pocillopora damicornis]	4.6e-36	Ankyrin repeat domain-containing protein 17	ANKRD17	protein kinase activity	protein phosphorylation	nucleoplasm part
Hech|HyE0001.100	XP_012555754.1 PREDICTED: major facilitator superfamily domain-containing protein 6-A-like [Hydra vulgaris]	7.3e-182	Major facilitator superfamily domain-containing protein 6-B	NA	nucleoside transmembrane transporter activity	nucleoside transmembrane transport	integral component of membrane
Hech|HyE0001.101	RMX38989.1 hypothetical protein pdam_00008152 [Pocillopora damicornis]	8.7e-35	NA	NA	NA	NA	NA
Hech|HyE0001.103	XP_012556670.1 PREDICTED: uncharacterized protein LOC100198789, partial [Hydra vulgaris]	2e-40	GPS domain-containing protein (Fragment)	NA	G protein-coupled receptor activity	cell surface receptor signaling pathway	integral component of membrane
Hech|HyE0001.104	XP_012556670.1 PREDICTED: uncharacterized protein LOC100198789, partial [Hydra vulgaris]	1.6e-87	G-protein coupled receptor	NA	G protein-coupled receptor activity	cell surface receptor signaling pathway	integral component of plasma membrane
Hech|HyE0001.105	XP_022798538.1 calcitonin gene-related peptide type 1 receptor-like [Stylophora pistillata]	1.7e-31	NA	NA	NA	NA	NA
Hech|HyE0001.106	XP_028397979.1 corticotropin-releasing factor receptor 1-like [Dendronephthya gigantea]	1.7e-20	NA	NA	NA	NA	NA
Hech|HyE0001.107	XP_012558397.1 PREDICTED: pollen-specific leucine-rich repeat extensin-like protein 2 [Hydra vulgaris]	5.8e-07	late cornified envelope-like proline-rich protein 1	NA	insulin-like growth factor binding	NA	extracellular region
Hech|HyE0001.108	XP_020619563.1 transmembrane prolyl 4-hydroxylase-like [Orbicella faveolata]	9.5e-100	Transmembrane prolyl 4-hydroxylase	P4HTM	L-ascorbic acid binding	peptidyl-proline hydroxylation to 4-hydroxy-L-proline	endoplasmic reticulum
Hech|HyE0001.109	XP_002163488.1 PREDICTED: RNA-binding protein 45-like [Hydra vulgaris]	1.4e-186	RNA binding motif protein 45	RBM45	RNA binding	NA	nucleus
Hech|HyE0001.110	XP_002169065.3 PREDICTED: protein AF-17-like [Hydra vulgaris]	3.3e-134	Myeloid/lymphoid or mixed-lineage leukemia translocated to, 10, transcript variant X3	MLLT10	metal ion binding	intestinal epithelial structure maintenance	nucleoplasm
Hech|HyE0001.111	XP_028416324.1 uncharacterized protein LOC114540243 [Dendronephthya gigantea]	2.5e-30	NA	NA	NA	NA	NA
Hech|HyE0001.115	XP_012556292.1 PREDICTED: coiled-coil domain-containing protein 132-like [Hydra vulgaris]	5.7e-260	Coiled-coil domain-containing protein 132	VPS50	SNARE binding	endocytic recycling	EARP complex
Hech|HyE0001.116	XP_002164964.1 PREDICTED: selenoprotein O-like [Hydra vulgaris]	1e-220	Selenoprotein O	NA	protein adenylyltransferase activity	protein adenylylation	mitochondrion
Hech|HyE0001.117	XP_012563234.1 PREDICTED: synaptotagmin-7-like isoform X1 [Hydra vulgaris]	1.1e-106	NA	NA	NA	NA	NA
Hech|HyE0001.118	XP_012563234.1 PREDICTED: synaptotagmin-7-like isoform X1 [Hydra vulgaris]	1.8e-60	NA	NA	NA	NA	NA
Hech|HyE0001.119	XP_012563234.1 PREDICTED: synaptotagmin-7-like isoform X1 [Hydra vulgaris]	4.1e-60	NA	NA	NA	NA	NA
Hech|HyE0001.120	KZS00063.1 Uncharacterized protein APZ42_003797 [Daphnia magna]	2.2e-07	NA	NA	NA	NA	NA
Hech|HyE0001.121	XP_012563234.1 PREDICTED: synaptotagmin-7-like isoform X1 [Hydra vulgaris]	1.6e-73	NA	NA	NA	NA	NA
Hech|HyE0001.122	XP_012556552.1 PREDICTED: protocadherin Fat 4-like [Hydra vulgaris]	0	FAT atypical cadherin 1	FAT1	calcium ion binding	Notch signaling pathway	plasma membrane
Hech|HyE0001.123	XP_012559468.1 PREDICTED: 5'-AMP-activated protein kinase subunit gamma-1-like [Hydra vulgaris]	5.6e-120	5'-AMP-activated protein kinase subunit gamma-2	PRKAG2	adenyl ribonucleotide binding	regulation of protein serine/threonine kinase activity	histone methyltransferase complex
Hech|HyE0001.124	XP_012555755.1 PREDICTED: beta-lactamase-like protein 4 [Hydra vulgaris]	2.4e-100	NA	NA	NA	NA	NA
Hech|HyE0001.126	XP_027059018.1 major facilitator superfamily domain-containing protein 12-like isoform X2 [Pocillopora damicornis]	2.9e-113	Sugar transporter	MFSD12	symporter activity	carbohydrate transport	integral component of membrane
Hech|HyE0001.127	XP_020616439.1 uncharacterized protein LOC110054392 [Orbicella faveolata]	1.6e-16	NA	NA	NA	NA	NA
Hech|HyE0001.129	XP_024597763.1 vesicular, overexpressed in cancer, prosurvival protein 1-like [Neophocaena asiaeorientalis asiaeorientalis]	9.1e-06	NA	NA	NA	NA	NA
Hech|HyE0001.130	XP_012564272.1 PREDICTED: B9 domain-containing protein 2-like [Hydra vulgaris]	3.3e-92	B9 domain-containing protein 2	B9D2	gamma-tubulin binding	cilium assembly	MKS complex
Hech|HyE0001.131	XP_002163732.2 PREDICTED: peptide deformylase, mitochondrial-like [Hydra vulgaris]	1.1e-65	Peptide deformylase	DEF	peptide deformylase activity	translation	mitochondrion
Hech|HyE0001.132	XP_002160179.1 PREDICTED: probable prolyl 4-hydroxylase 10 [Hydra vulgaris]	5e-96	2-oxoglutarate-dependent dioxygenase	NA	L-ascorbic acid binding	peptidyl-proline hydroxylation to 4-hydroxy-L-proline	endoplasmic reticulum
Hech|HyE0001.133	XP_018432157.1 PREDICTED: transcription factor HES-5-like [Nanorana parkeri]	4.9e-06	NA	NA	NA	NA	NA
Hech|HyE0001.134	XP_010598419.1 thiamin pyrophosphokinase 1 isoform X10 [Loxodonta africana]	2.2e-19	Thiamine pyrophosphokinase	TPK1	thiamine diphosphokinase activity	thiamine diphosphate biosynthetic process	integral component of membrane
Hech|HyE0001.135	XP_002158694.1 PREDICTED: RNA polymerase-associated protein LEO1-like [Hydra vulgaris]	2.8e-101	Evolutionarily conserved signaling intermediate in Toll pathway, mitochondrial	LEO1	RNA polymerase II C-terminal domain phosphoserine binding	transcription elongation from RNA polymerase II promoter	Cdc73/Paf1 complex
Hech|HyE0001.136	XP_004207050.1 PREDICTED: uncharacterized protein LOC101236484 [Hydra vulgaris]	1.3e-18	NA	NA	NA	NA	NA
Hech|HyE0001.138	XP_002168031.1 PREDICTED: UPF0586 protein C9orf41 homolog [Hydra vulgaris]	5.5e-116	carnosine N-methyltransferase	CARNMT1	carnosine N-methyltransferase activity	carnosine metabolic process	cytosol
Hech|HyE0001.139	XP_011679553.1 PREDICTED: transmembrane protein 198 [Strongylocentrotus purpuratus]	3.2e-20	NA	NA	NA	NA	NA
Hech|HyE0001.140	XP_027054896.1 potassium voltage-gated channel subfamily A member 2-like [Pocillopora damicornis]	1.7e-55	Potassium voltage-gated channel protein Shaker	NA	voltage-gated potassium channel activity	protein homooligomerization	voltage-gated potassium channel complex
Hech|HyE0001.141	XP_012563509.1 PREDICTED: peroxisomal carnitine O-octanoyltransferase-like, partial [Hydra vulgaris]	4e-129	Transmembrane protein 59-like	NA	NA	NA	integral component of membrane
Hech|HyE0001.142	XP_004208437.1 PREDICTED: uncharacterized protein LOC101238924 [Hydra vulgaris]	8.5e-13	NA	NA	NA	NA	NA
Hech|HyE0001.143	XP_012556304.1 PREDICTED: dual 3',5'-cyclic-AMP and -GMP phosphodiesterase 11A-like [Hydra vulgaris]	3.2e-282	Phosphodiesterase	NA	3',5'-cyclic-nucleotide phosphodiesterase activity	signal transduction	plasma membrane
Hech|HyE0001.144	XP_012565778.1 PREDICTED: uncharacterized protein LOC105849873 [Hydra vulgaris]	9e-87	NA	NA	NA	NA	NA
Hech|HyE0001.146	XP_002167200.2 PREDICTED: proteoglycan 4-like [Hydra vulgaris]	3.2e-49	NA	NA	NA	NA	NA
Hech|HyE0001.147	XP_020624172.1 uncharacterized protein LOC110061660 [Orbicella faveolata]	3.4e-09	NA	NA	NA	NA	NA
Hech|HyE0001.148	XP_012557057.1 PREDICTED: uncharacterized protein LOC100204302 [Hydra vulgaris]	3.7e-21	NA	NA	NA	NA	NA
Hech|HyE0001.149	XP_020908073.1 potassium voltage-gated channel subfamily A member 10-like [Exaiptasia pallida]	3.2e-65	Potassium voltage-gated channel protein Shaker	NA	voltage-gated potassium channel activity	protein homooligomerization	voltage-gated potassium channel complex
Hech|HyE0001.150	XP_020908073.1 potassium voltage-gated channel subfamily A member 10-like [Exaiptasia pallida]	1.1e-54	Potassium voltage-gated channel protein Shab	NA	voltage-gated potassium channel activity	potassium ion transmembrane transport	voltage-gated potassium channel complex
Hech|HyE0001.151	XP_020908073.1 potassium voltage-gated channel subfamily A member 10-like [Exaiptasia pallida]	5.4e-25	Potassium voltage-gated channel protein Shaw	NA	voltage-gated potassium channel activity	protein homooligomerization	voltage-gated potassium channel complex
Hech|HyE0001.152	XP_004207469.2 PREDICTED: SCAN domain-containing protein 3-like [Hydra vulgaris]	8.4e-172	KRAB-A domain-containing protein 2 (Fragment)	NA	nucleic acid binding	DNA integration	NA
Hech|HyE0001.153	XP_002156668.2 PREDICTED: sodium-coupled neutral amino acid transporter 5-like [Hydra vulgaris]	9.3e-100	Sodium-coupled neutral amino acid transporter 2	NA	amino acid transmembrane transporter activity	amino acid transmembrane transport	integral component of membrane
Hech|HyE0001.154	OPL32721.1 hypothetical protein AM593_04457, partial [Mytilus galloprovincialis]	4.3e-13	NA	NA	NA	NA	NA
Hech|HyE0001.155	XP_012554333.1 PREDICTED: major facilitator superfamily domain-containing protein 6-like [Hydra vulgaris]	2e-152	Double-stranded RNA-specific editase Adar	MFSD6	nucleoside transmembrane transporter activity	nucleoside transmembrane transport	integral component of membrane
Hech|HyE0001.156	XP_020611535.1 uncharacterized protein LOC110050010 [Orbicella faveolata]	2.3e-13	NA	NA	NA	NA	NA
Hech|HyE0001.157	XP_012559549.1 PREDICTED: myc box-dependent-interacting protein 1-like isoform X1 [Hydra vulgaris]	3.4e-139	Myc box-dependent-interacting protein 1	NA	serine-type peptidase activity	rhabdomere membrane biogenesis	cytoplasm
Hech|HyE0001.158	KXJ29169.1 hypothetical protein AC249_AIPGENE17048 [Exaiptasia pallida]	1.6e-53	NA	NA	NA	NA	NA
Hech|HyE0001.159	EKC37728.1 hypothetical protein CGI_10004496 [Crassostrea gigas]	0.00088	NA	NA	NA	NA	NA
[truncated: 21,847 more rows]

## Sheet: Legend
Supplemental Table S9. DIAMOND BLASTp top hits and PANNZER2 annotations for all predicted gene models for H. symbiolongicarpus and H. echinata.
