# Supplementary material for: The genome of the colonial hydroid Hydractinia reveals that their stem cells use a toolkit of evolutionarily shared genes with all animals
Source: Genome Res. 2024 Mar;34(3):498–513. doi: 10.1101/gr.278382.123 (PMC11067881; doi:10.1101/gr.278382.123)
Supplement: Supplement 2 [file Supplemental_Table_S11.xlsx]

## Sheet: Legend
Table S11. OrthoFinder and CAFÉ results for the orthology analyses of 49 species.

## Sheet: SM1_Input_Proteomes
Species	NCBI TaxID	Phylum	Exact Source URL	Date Downloaded	BUSCO4_Eukaryota	BUSCO5_Metazoa	Isoform filtering	Number of sequences (pre-filtering)	Number of sequences (post-filtering)	Relevant Citation(S)
acanthaster_planci	133434	Echinodermata	https://marinegenomics.oist.jp/cots/download/oki-cotsv1.0.EVM2.prot.gz	2019-02-15	C:90.6%[S:90.6%,D:0.0%],F:7.8%,M:1.6%,n:255	C:91.4%[S:90.9%,D:0.5%],F:4.8%,M:3.8%,n:954	no	24323	NA	https://www.ncbi.nlm.nih.gov/pubmed/28379940
acropora_digitifera	70779	Cnidaria	ftp://ftp.ncbi.nlm.nih.gov/genomes/all/GCF/000/222/465/GCF_000222465.1_Adig_1.1/GCF_000222465.1_Adig_1.1_protein.faa.gz	2019-02-15	C:75.7%[S:71.0%,D:4.7%],F:16.5%,M:7.8%,n:255	C:77.5%[S:71.5%,D:6.0%],F:10.2%,M:12.3%,n:954	yes	33878	26060	https://www.ncbi.nlm.nih.gov/pubmed/21785439
amphimedon_queenslandica	400682	Porifera	ftp://ftp.ensemblgenomes.org/pub/metazoa/release-42/fasta/amphimedon_queenslandica/pep/Amphimedon_queenslandica.Aqu1.pep.all.fa.gz	2019-02-15	C:92.5%[S:88.2%,D:4.3%],F:7.1%,M:0.4%,n:255	C:89.9%[S:84.4%,D:5.5%],F:4.2%,M:5.9%,n:954	no	43615	NA	https://metazoa.ensembl.org/Amphimedon_queenslandica/Info/Annotation/#genebuild
aurelia_aurita_atlantic	6145	Cnidaria	https://marinegenomics.oist.jp/aurelia_aurita/download/AUR21_r04_proteins.fa.gz	2019-07-26	C:75.3%[S:74.1%,D:1.2%],F:15.7%,M:9.0%,n:255	C:74.2%[S:73.3%,D:0.9%],F:13.8%,M:12.0%,n:954	yes	38007	28604	https://www.nature.com/articles/s41559-019-0853-y
aurelia_aurita_pacific	6145	Cnidaria	https://drive.google.com/drive/folders/1NC6bZ9cxWkZyofOsMPzrxIH3C7m1ySiu	2019-02-15	C:67.4%[S:59.6%,D:7.8%],F:9.4%,M:23.2%,n:255	C:66.2%[S:57.9%,D:8.3%],F:7.0%,M:26.8%,n:954	no	27044	NA	https://www.nature.com/articles/s41559-018-0719-8
branchiostoma_floridae	7739	Chordata	ftp://ftp.ncbi.nlm.nih.gov/genomes/all/GCF/000/003/815/GCF_000003815.1_Version_2/GCF_000003815.1_Version_2_protein.faa.gz	2019-02-07	C:87.9%[S:86.3%,D:1.6%],F:8.2%,M:3.9%,n:255	C:91.5%[S:88.4%,D:3.1%],F:3.6%,M:4.9%,n:954	yes	28623	28621	https://www.nature.com/articles/nature06967
caenorhabditis_elegans	6239	Nematoda	ftp://ftp.ncbi.nlm.nih.gov/genomes/all/GCF/000/002/985/GCF_000002985.6_WBcel235/GCF_000002985.6_WBcel235_protein.faa.gz	2019-02-07	C:97.7%[S:96.9%,D:0.8%],F:0.8%,M:1.5%,n:255	C:77.8%[S:76.6%,D:1.2%],F:2.2%,M:20.0%,n:954	yes	28311	20043	https://www.ncbi.nlm.nih.gov/bioproject/PRJNA13758/
capitella_teleta	283909	Annelida	ftp://ftp.ensemblgenomes.org/pub/metazoa/release-44/fasta/capitella_teleta/pep/Capitella_teleta.Capitella_teleta_v1.0.pep.all.fa.gz	2019-02-07	C:94.2%[S:92.2%,D:2.0%],F:4.3%,M:1.5%,n:255	C:95.0%[S:90.8%,D:4.2%],F:2.8%,M:2.2%,n:954	no	32175	NA	http://europepmc.org/abstract/MED/23254933
capsaspora_owczarzaki	192875	Filasterea	https://figshare.com/articles/Genome_-_Capsaspora_owczarzaki_v3_/4123158	2019-02-11	C:92.2%[S:91.4%,D:0.8%],F:3.5%,M:4.3%,n:255	C:72.8%[S:71.5%,D:1.3%],F:4.0%,M:23.2%,n:954	yes	10106	8740	https://elifesciences.org/articles/01287
ciona_intestinalis	7719	Chordata	ftp://ftp.ncbi.nlm.nih.gov/genomes/all/GCF/000/224/145/GCF_000224145.3_KH/GCF_000224145.3_KH_protein.faa.gz	2019-02-07	C:96.5%[S:96.5%,D:0.0%],F:2.0%,M:1.5%,n:255	C:93.8%[S:93.1%,D:0.7%],F:0.6%,M:5.6%,n:954	yes	21096	13724	https://www.ncbi.nlm.nih.gov/pubmed/12481130
clytia_hemisphaerica	252671	Cnidaria	http://marimba.obs-vlfr.fr/node/237573	2019-02-15	C:84.7%[S:83.9%,D:0.8%],F:3.9%,M:11.4%,n:255	C:76.1%[S:74.9%,D:1.2%],F:5.7%,M:18.2%,n:954	no	25087	NA	https://www.nature.com/articles/s41559-019-0833-2
creolimax_fragrantissima	470921	Ichtyosporea	https://figshare.com/articles/Creolimax_fragrantissima_genome_data/1403592	2019-02-11	C:95.7%[S:94.1%,D:1.6%],F:2.0%,M:2.3%,n:255	C:71.3%[S:69.6%,D:1.7%],F:2.9%,M:25.8%,n:954	no	8694	NA	https://elifesciences.org/articles/08904
danio_rerio	7955	Chordata	ftp://ftp.ensembl.org/pub/release-95/fasta/danio_rerio/pep/Danio_rerio.GRCz11.pep.all.fa.gz	2019-02-07	C:99.2%[S:83.9%,D:15.3%],F:0.8%,M:-0.0%,n:255	C:98.0%[S:79.6%,D:18.4%],F:0.7%,M:1.3%,n:954	yes	52089	30313	http://europepmc.org/abstract/MED/23594743
daphnia_pulex	6669	Arthropoda	https://www.dropbox.com/s/o6jrl17sknxszlt/PA42.3.0.protein_new.fasta?dl=0	2019-07-26	C:93.7%[S:91.0%,D:2.7%],F:2.7%,M:3.6%,n:255	C:93.1%[S:90.7%,D:2.4%],F:2.1%,M:4.8%,n:954	yes	109737	33063	https://www.g3journal.org/content/7/5/1405
dendronephthya_gigantea	151771	Cnidaria	ftp://ftp.ncbi.nlm.nih.gov/genomes/all/GCF/004/324/835/GCF_004324835.1_DenGig_1.0/GCF_004324835.1_DenGig_1.0_protein.faa.gz	2019-07-26	C:98.1%[S:86.3%,D:11.8%],F:0.4%,M:1.5%,n:255	C:94.3%[S:84.7%,D:9.6%],F:0.8%,M:4.9%,n:954	yes	28741	22043	https://academic.oup.com/gbe/article/11/3/949/5368506
drosophila_melanogaster	7227	Arthropoda	ftp://ftp.ncbi.nlm.nih.gov/genomes/all/GCF/000/001/215/GCF_000001215.4_Release_6_plus_ISO1_MT/GCF_000001215.4_Release_6_plus_ISO1_MT_protein.faa.gz	2019-02-07	C:99.6%[S:99.2%,D:0.4%],F:0.0%,M:0.4%,n:255	C:99.0%[S:97.6%,D:1.4%],F:0.2%,M:0.8%,n:954	yes	30493	13678	This is the original one, not sure about the newest version: https://science.sciencemag.org/content/287/5461/2185
exaiptasia_pallida	2652724	Cnidaria	ftp://ftp.ncbi.nlm.nih.gov/genomes/all/GCF/001/417/965/GCF_001417965.1_Aiptasia_genome_1.1/GCF_001417965.1_Aiptasia_genome_1.1_protein.faa.gz	2019-06-01	C:96.0%[S:93.3%,D:2.7%],F:2.7%,M:1.3%,n:255	C:94.6%[S:91.0%,D:3.6%],F:2.1%,M:3.3%,n:954	yes	27753	22508	https://www.ncbi.nlm.nih.gov/pubmed/26324906
gallus_gallus	9031	Chordata	ftp://ftp.ensembl.org/pub/release-95/fasta/gallus_gallus/pep/Gallus_gallus.GRCg6a.pep.all.fa.gz	2019-02-07	C:95.7%[S:94.5%,D:1.2%],F:2.0%,M:2.3%,n:255	C:92.0%[S:91.5%,D:0.5%],F:2.4%,M:5.6%,n:954	yes	28444	16878	https://www.g3journal.org/content/7/1/109
helobdella_robusta	6412	Annelida	ftp://ftp.ensemblgenomes.org/pub/metazoa/release-42/fasta/helobdella_robusta/pep/Helobdella_robusta.Helro1.pep.all.fa.gz	2019-02-07	C:97.3%[S:96.5%,D:0.8%],F:1.6%,M:1.1%,n:255	C:90.2%[S:89.2%,D:1.0%],F:4.6%,M:5.2%,n:954	no	23432	NA	http://europepmc.org/abstract/MED/23254933
hofstenia_miamia	442651	Aceolomorpha	Extracted from: http://srivastavalab.rc.fas.harvard.edu/	2019-07-31	C:55.3%[S:54.5%,D:0.8%],F:19.2%,M:25.5%,n:255	C:53.3%[S:52.0%,D:1.3%],F:11.3%,M:35.4%,n:954	no	22632	NA	https://science.sciencemag.org/content/363/6432/eaau6173
hoilungia_hongkongensis	1964320	Placozoa	https://bitbucket.org/molpalmuc/hoilungia-genome/src/master/sequences/Hhon_BRAKER1_proteins.fasta.gz	2019-02-15	C:93.0%[S:91.0%,D:2.0%],F:2.4%,M:4.6%,n:255	C:92.0%[S:89.3%,D:2.7%],F:1.0%,M:7.0%,n:954	yes	12575	12010	https://journals.plos.org/plosbiology/article?id=10.1371/journal.pbio.2005359
homo_sapiens	9606	Chordata	ftp://ftp.ncbi.nlm.nih.gov/genomes/all/GCF/000/001/405/GCF_000001405.38_GRCh38.p12/GCF_000001405.38_GRCh38.p12_protein.faa.gz	2019-02-07	C:99.6%[S:97.6%,D:2.0%],F:0.4%,M:0.0%,n:255	C:99.2%[S:97.6%,D:1.6%],F:0.6%,M:0.2%,n:954	yes	113620	20182	whatever the original human genome paperis
hydra_magnipapillata	6087	Cnidaria	https://research.nhgri.nih.gov/hydra/download/genemodels_proteins/hydra2.0_genemodels.aa.gz	2019-02-11	C:86.3%[S:85.9%,D:0.4%],F:10.6%,M:3.1%,n:255	C:83.1%[S:81.2%,D:1.9%],F:8.9%,M:8.0%,n:954	yes	36059	33820	https://www.ncbi.nlm.nih.gov/pubmed/20228792
hydractinia_echinata	35630	Cnidaria	https://research.nhgri.nih.gov/hydractinia/download/index.cgi?dl=gn	NA	C:94.1%[S:83.9%,D:10.2%],F:3.5%,M:2.4%,n:255	C:90.7%[S:78.4%,D:12.3%],F:2.7%,M:6.6%,n:954	no	28825	NA	This publication
hydractinia_symbiolongicarpus	13093	Cnidaria	https://research.nhgri.nih.gov/hydractinia/download/index.cgi?dl=gn	NA	C:92.9%[S:83.9%,D:9.0%],F:2.7%,M:4.4%,n:255	C:92.5%[S:82.3%,D:10.2%],F:1.3%,M:6.2%,n:954	no	22022	NA	This publication
ixodes_scapularis	6945	Arthropoda	https://www.vectorbase.org/download/ixodes-scapularis-wikel_PEPTIDES_iscaw1.6.fa.gz	2019-02-11	C:72.6%[S:71.0%,D:1.6%],F:16.9%,M:10.5%,n:255	C:78.3%[S:77.5%,D:0.8%],F:12.7%,M:9.0%,n:954	no	20486	NA	https://www.nature.com/articles/ncomms10507
kudoa_iwatai	269814	Cnidaria	Author's unpublished from Chang et al. 2015, available upon request)		C:54.1%[S:52.9%,D:1.2%],F:10.6%,M:35.3%,n:255	C:36.6%[S:36.1%,D:0.5%],F:6.3%,M:57.1%,n:954	no	5534	NA	https://www.pnas.org/content/112/48/14912
lottia_gigantea	225164	Mollusca	ftp://ftp.ensemblgenomes.org/pub/metazoa/release-42/fasta/lottia_gigantea/pep/Lottia_gigantea.Lotgi1.pep.all.fa.gz	2019-02-07	C:96.5%[S:95.7%,D:0.8%],F:2.4%,M:1.1%,n:255	C:96.6%[S:95.9%,D:0.7%],F:1.5%,M:1.9%,n:954	no	23340	NA	http://europepmc.org/abstract/MED/23254933
mnemiopsis_leidyi	27923	Ctenophora	https://research.nhgri.nih.gov/mnemiopsis/download/proteome/ML2.2.aa.gz	2019-02-11	C:83.6%[S:82.4%,D:1.2%],F:8.2%,M:8.2%,n:255	C:73.9%[S:73.2%,D:0.7%],F:5.1%,M:21.0%,n:954	no	16548	NA	https://www.ncbi.nlm.nih.gov/pmc/articles/PMC3920664/
monosiga_brevicollis	81824	Choanoflagellatea	ftp://ftp.jgi-psf.org/pub/JGI_data/Monosiga_brevicollis/annotation/v1.0/Monbr1_best_proteins.fasta.gz	2019-02-15	C:79.2%[S:79.2%,D:0.0%],F:7.5%,M:13.3%,n:255	C:59.8%[S:59.4%,D:0.4%],F:6.4%,M:33.8%,n:954	no	9196	NA	https://www.ncbi.nlm.nih.gov/pubmed/18273011
morbakka_virulenta	686327	Cnidaria	https://marinegenomics.oist.jp/morbakka_virulenta/download/MOR05_r06_proteins.fa.gz	2019-07-26	C:85.1%[S:84.7%,D:0.4%],F:10.6%,M:4.3%,n:255	C:84.5%[S:84.0%,D:0.5%],F:8.5%,M:7.0%,n:954	yes	28983	24278	https://www.nature.com/articles/s41559-019-0853-y
nematostella_vectensis	45351	Cnidaria	ftp://ftp.ncbi.nlm.nih.gov/genomes/all/GCF/000/209/225/GCF_000209225.1_ASM20922v1/GCF_000209225.1_ASM20922v1_protein.faa.gz	2019-02-07	C:93.4%[S:91.4%,D:2.0%],F:5.5%,M:1.1%,n:255	C:89.7%[S:87.9%,D:1.8%],F:4.8%,M:5.5%,n:954	yes	24780	24773	https://www.ncbi.nlm.nih.gov/pubmed/17615350
nemopilema_nomurai	321803	Cnidaria	http://www.jellyfishgenome.com/index.php/%27%27Nemopilema_nomurai%27%27_genome	2019-07-26	C:95.3%[S:89.8%,D:5.5%],F:2.7%,M:2.0%,n:255	C:92.4%[S:85.4%,D:7.0%],F:3.1%,M:4.5%,n:954	no	19525	NA	https://bmcbiol.biomedcentral.com/articles/10.1186/s12915-019-0643-7
notospermus_geniculatus	416868	Nemertea	https://marinegenomics.oist.jp/nge_v2/download/nge_genome_v2.0_prot.fa.gz	2019-02-15	C:94.5%[S:64.3%,D:30.2%],F:4.7%,M:0.8%,n:255	C:93.6%[S:64.4%,D:29.2%],F:3.8%,M:2.6%,n:954	no	43294	NA	https://www.ncbi.nlm.nih.gov/pubmed/29203924
octopus_bimaculoides	37653	Mollusca	ftp://ftp.ensemblgenomes.org/pub/metazoa/release-42/fasta/octopus_bimaculoides/pep/Octopus_bimaculoides.PRJNA270931.pep.all.fa.gz	2019-02-15	C:92.9%[S:92.5%,D:0.4%],F:5.9%,M:1.2%,n:255	C:94.3%[S:93.7%,D:0.6%],F:3.4%,M:2.3%,n:954	yes	23994	15842	http://europepmc.org/abstract/MED/26268193
orbicella_faveolata	48498	Cnidaria	ftp://ftp.ncbi.nlm.nih.gov/genomes/all/GCF/002/042/975/GCF_002042975.1_ofav_dov_v1/GCF_002042975.1_ofav_dov_v1_protein.faa.gz	2019-02-20	C:87.4%[S:84.3%,D:3.1%],F:7.5%,M:5.1%,n:255	C:87.1%[S:84.0%,D:3.1%],F:6.7%,M:6.2%,n:954	yes	32587	25926	https://www.sciencedirect.com/science/article/pii/S096098221631123X?via%3Dihub#app1
phoronis_australis	115415	Phoronida	https://marinegenomics.oist.jp/pau_v2/download/pau_genome_v2.0_prot.fa.gz	2019-02-15	C:94.9%[S:93.7%,D:1.2%],F:4.7%,M:0.4%,n:255	C:96.4%[S:94.5%,D:1.9%],F:2.4%,M:1.2%,n:954	no	20473	NA	https://www.ncbi.nlm.nih.gov/pubmed/29203924
pocillopora_damicornis	46731	Cnidaria	ftp://ftp.ncbi.nlm.nih.gov/genomes/all/GCF/003/704/095/GCF_003704095.1_ASM370409v1/GCF_003704095.1_ASM370409v1_protein.faa.gz	2019-07-26	C:94.1%[S:94.1%,D:0.0%],F:3.1%,M:2.8%,n:255	C:93.0%[S:92.8%,D:0.2%],F:3.4%,M:3.6%,n:954	yes	25183	19935	https://www.nature.com/articles/s41598-018-34459-8
pristionchus_pacificus	54126	Nematoda	ftp://ftp.ebi.ac.uk/pub/databases/wormbase/parasite/releases/WBPS12/species/pristionchus_pacificus/PRJNA12644/pristionchus_pacificus.PRJNA12644.WBPS12.protein.fa.gz	2019-02-11	C:80.4%[S:79.2%,D:1.2%],F:6.3%,M:13.3%,n:255	C:66.2%[S:64.5%,D:1.7%],F:4.1%,M:29.7%,n:954	no	25517	NA	http://europepmc.org/abstract/MED/18806794
renilla_muelleri	37510	Cnidaria	http://rmue.reefgenomics.org/download/renilla_predicted_proteins.fa.gz	2019-02-15	C:81.6%[S:75.3%,D:6.3%],F:12.2%,M:6.2%,n:255	C:78.9%[S:75.7%,D:3.2%],F:7.4%,M:13.7%,n:954	yes	23671	23660	https://academic.oup.com/gigascience/article/8/4/giz026/5426564
saccharomyces_cerevisiae	4932	Fungi	ftp://ftp.ncbi.nlm.nih.gov/genomes/all/GCF/000/146/045/GCF_000146045.2_R64/GCF_000146045.2_R64_protein.faa.gz	2019-02-11	C:93.3%[S:92.5%,D:0.8%],F:1.2%,M:5.5%,n:255	C:39.9%[S:35.5%,D:4.4%],F:4.1%,M:56.0%,n:954	no	6002	NA	whatever the original yeast genome paper is
saccoglossus_kowalevskii	10224	Hemichordata	ftp://ftp.ncbi.nlm.nih.gov/genomes/all/GCF/000/003/605/GCF_000003605.2_Skow_1.1/GCF_000003605.2_Skow_1.1_protein.faa.gz	2019-02-07	C:87.9%[S:87.5%,D:0.4%],F:9.4%,M:2.7%,n:255	C:89.8%[S:89.2%,D:0.6%],F:7.1%,M:3.1%,n:954	yes	22111	20935	https://www.ncbi.nlm.nih.gov/pubmed/26580012
salpingoeca_rosetta	946362	Choanoflagellatea	ftp://ftp.ncbi.nlm.nih.gov/genomes/all/GCF/000/188/695/GCF_000188695.1_Proterospongia_sp_ATCC50818/GCF_000188695.1_Proterospongia_sp_ATCC50818_protein.faa.gz	2019-02-15	C:83.1%[S:83.1%,D:0.0%],F:6.7%,M:10.2%,n:255	C:66.1%[S:65.5%,D:0.6%],F:6.9%,M:27.0%,n:954	yes	11731	11624	https://www.ncbi.nlm.nih.gov/pubmed/23419129
schistosoma_mansoni	6183	Platyhelminthes	ftp://ftp.ebi.ac.uk/pub/databases/wormbase/parasite/releases/WBPS13/species/schistosoma_mansoni/PRJEA36577/schistosoma_mansoni.PRJEA36577.WBPS13.protein.fa.gz	2019-02-07	C:94.9%[S:92.5%,D:2.4%],F:2.0%,M:3.1%,n:255	C:78.1%[S:74.9%,D:3.2%],F:2.5%,M:19.4%,n:954	yes	14499	10144	http://europepmc.org/abstract/MED/22253936
schmidtea_mediterranea	79327	Platyhelminthes	http://planmine.mpi-cbg.de/planmine/model/bulkdata/smes_v2_hconf_SMESG.gff3.zip	2019-08-02	C:89.0%[S:69.4%,D:19.6%],F:3.5%,M:7.5%,n:255	C:77.7%[S:58.2%,D:19.5%],F:3.5%,M:18.8%,n:954	no	31102	NA	https://www.nature.com/articles/nature25473
sphaeroforma_arctica	72019	Ichtyosporea	ftp://ftp.ncbi.nlm.nih.gov/genomes/all/GCF/001/186/125/GCF_001186125.1_Spha_arctica_JP610_V1/GCF_001186125.1_Spha_arctica_JP610_V1_protein.faa.gz	2019-02-15	C:63.2%[S:62.4%,D:0.8%],F:23.5%,M:13.3%,n:255	C:47.4%[S:46.8%,D:0.6%],F:14.9%,M:37.7%,n:954	yes	18730	18213	https://www.sciencedirect.com/science/article/pii/S0960982218310637?via%3Dihub
tribolium_castaneum	7070	Arthropoda	ftp://ftp.ncbi.nlm.nih.gov/genomes/all/GCF/000/002/335/GCF_000002335.3_Tcas5.2/GCF_000002335.3_Tcas5.2_protein.faa.gz	2019-08-02	C:97.7%[S:97.3%,D:0.4%],F:2.0%,M:0.3%,n:255	C:99.2%[S:98.7%,D:0.5%],F:0.4%,M:0.4%,n:954	yes	16564	12874	https://www.ncbi.nlm.nih.gov/pubmed/18362917
trichoplax_adhaerens_long_iso	10228	Placozoa	https://bitbucket.org/wrf/genome-reannotations/downloads/Trichoplax_scaffolds_JGI_AUGUSTUS_maxtrack2.prots.fasta.gz	2019-02-11	C:96.1%[S:94.9%,D:1.2%],F:2.4%,M:1.5%,n:255	C:93.7%[S:92.8%,D:0.9%],F:1.7%,M:4.6%,n:954	yes	18508	12633	Re-annotated for: https://journals.plos.org/plosbiology/article?id=10.1371/journal.pbio.2005359
xenopus_tropicalis_long_iso	8364	Chordata	ftp://ftp.ncbi.nlm.nih.gov/genomes/all/GCF/000/004/195/GCF_000004195.3_Xenopus_tropicalis_v9.1/GCF_000004195.3_Xenopus_tropicalis_v9.1_protein.faa.gz	2019-04-15	C:97.7%[S:97.3%,D:0.4%],F:0.8%,M:1.5%,n:255	C:96.9%[S:96.0%,D:0.9%],F:1.2%,M:1.9%,n:954	yes	39662	21196	https://www.ncbi.nlm.nih.gov/pubmed/20431018

## Sheet: SM2_Input_OMIM_Proteins
NCBI_Prot_ID	GeneID	Locus	MIM_Number	Gene_Symbols	Gene_Name	Phenotype_Class
NP_000006.2	10	NAT2	612182	NAT2, AAC2	Arylamine N-acetyltransferase-2	3
NP_000008.1	35	ACADS	606885	ACADS, SCAD	Acyl-Coenzyme A dehydrogenase, C-2 to C-3 short chain	3
NP_000010.1	38	ACAT1	607809	ACAT1	Acetyl-Coenzyme A acetyltransferase-1 (acetoacetyl Coenzyme A thiolase)	3
NP_000013.2	100	ADA	608958	ADA	Adenosine deaminase	3
NP_000015.1	154	ADRB2	109690	ADRB2	Adrenergic, beta-2-, receptor, surface	3
NP_000016.1	155	ADRB3	109691	ADRB3	Adrenergic, beta-3-, receptor	3
NP_000018.2	175	AGA	613228	AGA	Aspartylglucosaminidase	3
NP_000020.1	183	AGT	106150	AGT, SERPINA8	Angiotensinogen	3
NP_000021.1	189	AGXT	604285	AGXT, SPAT	Alanine-glyoxylate aminotransferase, liver-specific peroxisomal	3
NP_000023.2	212	ALAS2	301300	ALAS2, ANH1, ASB, XLEPP, XLSA, SIDBA1	Aminolevulinate, delta-, synthase-2	3
NP_000024.2	215	ABCD1	300371	ABCD1, ALD, AMN	ATP-binding cassette, subfamily D, member 1	3
NP_000026.2	229	ALDOB	612724	ALDOB	Aldolase B, fructose-bisphosphatase	3
NP_000027.2	270	AMPD1	102770	AMPD1, MMDD	Adenosine monophosphate deaminase-1, muscle	3
NP_000031.1	345	APOC3	107720	APOC3, HALP2	Apolipoprotein C-III	3
NP_000035.2	367	AR	313700	AR, DHTR, TFM, SBMA, KD, SMAX1, HYSP1	Androgen receptor (dihydrotestosterone receptor)	3
NP_000043.4	538	ATP7A	300011	ATP7A, MNK, MK, OHS, SMAX3	ATPase, Cu++ transporting, alpha polypeptide	3
NP_000045.1	554	AVPR2	300538	AVPR2, DIR, DI1, ADHR	Arginine vasopressin receptor-2	3
NP_000046.1	590	BCHE	177400	BCHE, CHE1, BCHED	Butyrylcholinesterase	3
NP_000048.1	641	BLM	604610	RECQL3, RECQ2, BLM, BS, MGRISCE1	DNA helicase, RecQ-like 3	3
NP_000050.2	675	BRCA2	600185	BRCA2, FANCD1, BROVCA2, GLM3, PNCA2	BRCA2 gene	3
NP_000054.2	717	C2	613927	C2, ARMD14	Complement component-2	3
NP_000055.2	718	C3	120700	C3, ARMD9, AHUS5	Complement component-3	3
NP_000058.1	760	CA2	611492	CA2	Carbonic anhydrase II	3
NP_000060.2	779	CACNA1S	114208	CACNA1S, CACNL1A3, CCHL1A3, TTPP1, HOKPP1	Calcium channel, voltage-dependent, L type, alpha 1S subunit	3
NP_000061.1	825	CAPN3	114240	CAPN3, CANP3, LGMDR1, LGMDD4	Calpain, large polypeptide L3	3
NP_000065.1	959	CD40LG	300386	TNFSF5, CD40LG, HIGM1, IGM	Tumor necrosis factor ligand superfamily, member 5	3
NP_000066.1	1019	CDK4	123829	CDK4, CMM3	Cyclin-dependent kinase 4	3
NP_000067.1	1028	CDKN1C	600856	CDKN1C, KIP2, BWS, IMAGE	Cyclin-dependent kinase inhibitor 1C (p57, Kip2)	3
NP_000069.2	1071	CETP	118470	CETP, HDLCQ10	Cholesteryl ester transfer protein, plasma	3
NP_000071.1	1145	CHRNE	100725	CHRNE, SCCMS, CMS4A, CMS4B, CMS4C	Cholinergic receptor, nicotinic, epsilon polypeptide	3
NP_000073.1	1161	ERCC8	609412	ERCC8, CKN1, CSA, UVSS2	Excision repair cross-complementing rodent repair deficiency, complementation group 8	3
NP_000074.2	1180	CLCN1	118425	CLCN1	Chloride channel-1, skeletal muscle	3
NP_000076.2	1188	CLCNKB	602023	CLCNKB	Chloride channel, kidney, B	3
NP_000079.2	1277	COL1A1	120150	COL1A1, OI1, OI2, OI3, OI4, EDSARTH1, CAFYD	Collagen I, alpha-1 polypeptide	3
NP_000080.2	1278	COL1A2	120160	COL1A2, EDSCV, EDSARTH2	Collagen I, alpha-2 polypeptide	3
NP_000081.1	1281	COL3A1	120180	COL3A1, EDSVASC, PMGEDSV	Collagen III, alpha-1 polypeptide	3
NP_000082.2	1285	COL4A3	120070	COL4A3, ATS2, ATS3	Collagen IV, alpha-3 polypeptide (Goodpasture antigen)	3
NP_000085.1	1294	COL7A1	120120	COL7A1, NDNC8	Collagen VII, alpha-1 polypeptide	3
NP_000086.2	1311	COMP	600310	COMP, EDM1, MED, PSACH	Cartilage oligomeric matrix protein	3
NP_000088.3	1371	CPOX	612732	CPOX	Coproporphyrinogen oxidase	3
NP_000089.1	1376	CPT2	600650	CPT2, IIAE4	Carnitine palmitoyltransferase II	3
NP_000090.1	1471	CST3	604312	CST3, ARMD11	Cystatin C	3
NP_000091.1	1476	CSTB	601145	CSTB, STFB, EPM1, PME, EPM1A, ULD	Cystatin B (stefin B)	3
NP_000093.1	1586	CYP17A1	609300	CYP17A1, CYP17, P450C17	Cytochrome P450, family 17, subfamily A, polypeptide 1 (steroid 17-alpha-hydroxylase)	3
NP_000095.2	1545	CYP1B1	601771	CYP1B1, GLC3A, ASGD6	Cytochrome P450, subfamily I, dioxin-inducible, polypeptide 1	3
NP_000097.3	1565	CYP2D6	124030	CYP2D6, CPD6, P450DB1	Cytochrome P450, subfamily IID, polypeptide 6	3
NP_000098.1	1643	DDB2	600811	DDB2	Damage-specific DNA binding protein 2, 48kD	3
NP_000099.2	1738	DLD	238331	DLD, LAD, PHE3, DLDD	Dihydrolipoamide dehydrogenase (E3 component of pyruvate dehydrogenase complex, 2-oxo-glutarate complex)	3
NP_000101.2	1806	DPYD	612779	DPYD, DPD	Dihydropyrimidine dehydrogenase	3
NP_000102.1	1811	SLC26A3	126650	SLC26A3, DRA, CLD	Solute carrier family 26 (sulfate transporter), member 3	3
NP_000104.1	1861	TOR1A	605204	DYT1, TOR1A	Torsin A	3
NP_000111.1	2052	EPHX1	132810	EPHX1	Epoxide hydroxylase 1, microsomal xenobiotic	3
NP_000112.1	2057	EPOR	133171	EPOR	Erythropoietin receptor	3
NP_000114.2	2073	ERCC5	133530	ERCC5, XPG, COFS3	Excision-repair, complementing defective, in Chinese hamster, number 5	3
NP_000117.1	2108	ETFA	608053	ETFA, GA2, MADD	Electron transfer flavoprotein, alpha polypeptide	3
NP_000118.2	2131	EXT1	608177	EXT1	Exostosin 1	3
NP_000120.2	2162	F13A1	134570	F13A1, F13A	Coagulation factor XIII, A polypeptide	3
NP_000121.2	2153	F5	612309	F5, THPH2, RPRGL1	Coagulation factor V (proaccelerin, labile factor)	3
NP_000123.1	2157	F8	300841	F8, F8C, HEMA	Coagulation factor VIII, procoagulant component	3
NP_000124.1	2158	F9	300746	F9, HEMB, THPH8	Coagulation factor IX (plasma thromboplastic component)	3
NP_000129.3	2200	FBN1	134797	FBN1, MFS1, WMS2, SSKS, GPHYSD2, ACMICD, ECTOL1, MFLS	Fibrillin-1	3
NP_000134.2	2271	FH	136850	FH, HLRCC, MCUL1, FMRD	Fumarate hydratase	3
NP_000135.2	2395	FXN	606829	FXN, FRDA, FARR, X25	Frataxin	3
NP_000138.2	2517	FUCA1	612280	FUCA1	Fucosidase, alpha-L- 1, tissue	3
NP_000142.2	2538	G6PC	613742	G6PC, G6PT	Glucose-6-phosphatase, catalytic	3
NP_000144.2	2581	GALC	606890	GALC	Galactosylceramidase	3
NP_000145.1	2584	GALK1	604313	GALK1	Galactokinase-1	3
NP_000146.2	2592	GALT	606999	GALT	Galactose-1-phosphate uridyltransferase	3
NP_000148.2	2629	GBA	606463	GBA	Glucosidase, acid beta	3
NP_000149.3	2632	GBE1	607839	GBE1, GSD4, APBD	Glycogen branching enzyme	3
NP_000156.1	2697	GJA1	121014	GJA1, CX43, ODDD, SDTY3, ODOD, HSS, AVSD3, HLHS1, CMDR, EKVP3	Gap junction protein, alpha-1, 43kD (connexin 43)	3
NP_000159.3	2737	GLI3	165240	GLI3, PAPA, PAPB	GLI-Kruppel family member GLI3 (oncogene GLI3)	3
NP_000160.1	2717	GLA	300644	GLA	Galactosidase, alpha	3
NP_000161.2	2731	GLDC	238300	GLDC, HYGN1, GCSP, GCE, NKH	Glycine dehydrogenase (decarboxylating; glycine decarboxylase, glycine cleavage system protein P)	3
NP_000164.5	2811	GP1BA	606672	GP1BA, BSS, BDPLT1, VWDP, BDPLT3	Glycoprotein Ib, platelet, alpha polypeptide	3
NP_000168.1	2934	GSN	137350	GSN	Gelsolin	3
NP_000169.1	2937	GSS	601002	GSS, GSHS	Glutathione synthetase	3
NP_000171.1	3000	GUCY2D	600179	GUCY2D, GUC2D, LCA1, CORD6, RCD2, CACD1, CSNB1I	Guanylate cyclase 2D, membrane, retina-specific	3
NP_000172.2	2990	GUSB	611499	GUSB, MPS7	Glucuronidase, beta-	3
NP_000173.2	3030	HADHA	600890	HADHA, MTPA	Hydroxyacyl-Coenzyme A dehydrogenase/3-ketoacyl-Coenzyme A thiolase/ enoyl-Coenzyme A hydratase (trifunctional protein), alpha subunit	3
NP_000174.1	3032	HADHB	143450	HADHB	Hydroxyacyl-Coenzyme A dehydrogenase/3-ketoacyl-Coenzyme A thiolase /enoyl-Coenzyme A hydratase (trifunctional protein), beta subunit	3
NP_000175.1	3048	HBG2	142250	HBG2, TNCY	Hemoglobin, gamma G	3
NP_000176.2	3053	SERPIND1	142360	HCF2, HC2, SERPIND1, THPH10	Heparin cofactor II	3
NP_000177.2	3075	CFH	134370	CFH, HF1, HUS, ARMD4, AHUS1	Complement factor H	3
NP_000178.2	3081	HGD	607474	HGD, AKU	Homogentisate 1,2-dioxygenase (homogentisate oxidase)	3
NP_000181.2	3145	HMBS	609806	HMBS, PBGD, UPS	Hydroxymethylbilane synthase	3
NP_000182.2	3155	HMGCL	613898	HMGCL	3-hydroxy-3-methylglutaryl-Coenzyme A lyase	3
NP_000184.1	6469	SHH	600725	SHH, HPE3, HLP3, SMMCI, MCOPCB5	Sonic hedgehog signaling molecule	3
NP_000185.1	3251	HPRT1	308000	HPRT1, HPRT	Hypoxanthine phosphoribosyltransferase 1	3
NP_000187.3	3291	HSD11B2	614232	HSD11B2, HSD11K, AME	Hydroxysteroid (11-beta) dehydrogenase 2	3
NP_000190.1	6448	SGSH	605270	SGSH, MPS3A, SFMD	N-sulfoglucosamine sulfohydrolase (sulfamidase)	3
NP_000192.2	3383	ICAM1	147840	ICAM1	Intercellular adhesion molecule-1	3
NP_000193.1	3423	IDS	300823	IDS, MPS2, SIDS	Iduronate 2-sulfatase (Hunter syndrome)	3
NP_000194.2	3425	IDUA	252800	IDUA, IDA	Iduronidase, alpha-L-	3
NP_000197.1	3561	IL2RG	308380	IL2RG, SCIDX1, SCIDX, IMD4	Interleukin-2 receptor, gamma	3
NP_000199.2	3643	INSR	147670	INSR, HHF5	Insulin receptor	3
NP_000200.1	3651	PDX1	600733	PDX1, IPF1, MODY4, PAGEN1	Pancreas/duodenum homeobox protein 1	3
NP_000203.2	3690	ITGB3	173470	ITGB3, GP3A, GT, BDPLT2, BDPLT16	Integrin, beta-3 (platelet glycoprotein IIIa; antigen CD61)	3
NP_000205.1	182	JAG1	601920	JAG1, AGS1, AHD, DCHE	Jagged 1	3
NP_000207.2	3730	ANOS1	300836	ANOS1, KAL1, KMS, ADMLX, HH1	Anosmin 1	3
NP_000208.2	3736	KCNA1	176260	KCNA1, AEMK, EA1	Potassium voltage-gated channel, shaker-related subfamily, member 1	3
NP_000209.2	3784	KCNQ1	607542	KCNQ1, KCNA9, LQT1, KVLQT1, ATFB3, SQT2	Potassium voltage-gated channel, KQT-like subfamily, member 1	3
NP_000211.1	3758	KCNJ1	600359	KCNJ1, ROMK1	Potassium inwardly-rectifying channel, subfamily J, member 1	3
NP_000214.1	3859	KRT12	601687	KRT12, MECD1	Keratin 12	3
NP_000217.2	3857	KRT9	607606	KRT9, EPPK	Keratin 9	3
NP_000220.1	3931	LCAT	606967	LCAT	Lecithin-cholesterol acyltransferase	3
NP_000221.1	3952	LEP	164160	LEP, OB, LEPD	Leptin (murine obesity homolog)	3
NP_000223.1	6443	SGCB	600900	SGCB, LGMDR4	Sarcoglycan, beta (43kD dystrophin-associated glycoprotein)	3
NP_000224.2	3973	LHCGR	152790	LHCGR, LHR, LCGR	Luteinizing hormone/choriogonadotropin receptor	3
NP_000228.1	4023	LPL	609708	LPL, LIPD, HDLCQ11	Lipoprotein lipase	3
NP_000229.1	3757	KCNH2	152427	KCNH2, LQT2, HERG, SQT1	Potassium voltage-gated channel, subfamily H, member 2 (human ether-a-go-go-related gene)	3
NP_000230.1	4069	LYZ	153450	LYZ	Lysozyme	3
NP_000231.1	4128	MAOA	309850	MAOA, BRNRS	Monoamine oxidase A	3
NP_000234.1	4210	MEFV	608107	MEFV, MEF, FMF	Pyrin (marenostrin)	3
NP_000240.1	4292	MLH1	120436	MLH1, COCA2, HNPCC2	DNA mismatch repair protein MLH1	3
NP_000241.1	4353	MPO	606989	MPO	Myeloperoxidase	3
NP_000247.2	4607	MYBPC3	600958	MYBPC3, CMH4, CMD1MM, LVNC10	Myosin-binding protein C, cardiac	3
NP_000249.1	4634	MYL3	160790	MYL3, CMH8	Myosin, light polypeptide-3, alkali; ventricular, skeletal, slow	3
NP_000252.1	4653	MYOC	601652	MYOC, TIGR, GLC1A, JOAG, GPOA	Myocilin (trabecular meshwork-induced glucocorticoid response protein)	3
NP_000253.1	4668	NAGA	104170	NAGA	Acetylgalactosaminidase, alpha-N- (alpha-galactosidase B)	3
NP_000255.2	5727	PTCH1	601309	PTCH1, NBCCS, BCNS, HPE7	Patched 1	3
NP_000256.4	653361	NCF1	608512	NCF1	Neutrophil cytosolic factor-1, 47kD	3
NP_000257.1	4693	NDP	300658	NDP, ND, EVR2	Norrin	3
NP_000259.1	4771	NF2	607379	NF2	Merlin	3
NP_000261.2	4860	PNP	164050	PNP, NP	Purine nucleoside phosphorylase	3
NP_000264.2	4935	GPR143	300808	GPR143, OA1, NYS6	G protein-coupled receptor 143	3
NP_000268.1	5053	PAH	612349	PAH, PKU1	Phenylalanine hydroxylase	3
NP_000276.2	5184	PEPD	613230	PEPD	Peptidase D (prolidase)	3
NP_000277.1	5193	PEX12	601758	PEX12, PBD3A	Peroxisome biogenesis factor 12	3
NP_000278.3	5190	PEX6	601498	PEX6, PXAAA1, PAF2, PBD4A, PDB4B, HMLR2	Peroxisomal biogenesis factor 6 (peroxisomal AAA-type ATPase 1)	3
NP_000279.1	5191	PEX7	601757	PEX7, RCDP1, PBD9B	Peroxisomal biogenesis factor-7	3
NP_000281.2	5224	PGAM2	612931	PGAM2, PGAMM, GSD10	Phosphoglycerate mutase, muscle form	3
NP_000282.1	5230	PGK1	311800	PGK1, PGKA	Phosphoglycerate kinase-1	3
NP_000285.1	5261	PHKG2	172471	PHKG2, GSD9C	Phosphorylase kinase, gamma 2 (testis/liver)	3
NP_000288.1	5311	PKD2	173910	PKD2	Polycystin-2	3
NP_000289.1	5313	PKLR	609712	PKLR, PK1	Pyruvate kinase, liver and RBC type	3
NP_000290.2	5317	PKP1	601975	PKP1	Plakophilin-1	3
NP_000292.1	5340	PLG	173350	PLG	Plasminogen	3
NP_000294.1	5373	PMM2	601785	PMM2, CDG1A	Phosphomannomutase 2	3
NP_000296.2	5445	PON2	602447	PON2	Paraoxonase-2	3
NP_000298.3	5456	POU3F4	300039	POU3F4, DFN3, DFNX2	POU domain, class 3, transcription factor 4	3
NP_000299.2	5476	CTSA	613111	CTSA, PPGB, GSL, NGBE, GLB2	Cathepsin A (protective protein for beta-galactosidase)	3
NP_000301.1	5538	PPT1	600722	PPT1, CLN1	Palmitoyl-protein thioesterase 1	3
NP_000308.1	5805	PTS	612719	PTS	6-pyruvoyltetrahydropterin synthase	3
NP_000309.1	5828	PEX2	170993	PEX2, PAF1, PMP35, PBD5A, PBD5B, PXMP3	Peroxisome biogenesis factor 2	3
NP_000311.2	5860	QDPR	612676	QDPR, DHPR	Quinoid dihydropteridine reductase	3
NP_000312.2	5925	RB1	614041	RB1	Retinoblastoma-1	3
NP_000313.2	5961	PRPH2	179605	PRPH2, DS, RP7, PRPH, AVMD, AOFMD, CACD2, MDBS1	Peripherin 2	3
NP_000315.2	6005	RHAG	180297	RHAG, RH50A, OHST, RHNR	Rhesus blood group-associated glycoprotein	3
NP_000316.2	5308	PITX2	601542	PITX2, IDG2, RIEG1, RGS, IGDS2, ASGD4	Paired-like homeodomain transcription factor-2	3
NP_000318.1	6094	ROM1	180721	ROM1, ROSP1, RP7	Rod outer segment membrane protein-1	3
NP_000320.1	6121	RPE65	180069	RPE65, RP20, LCA2	RPE65 retinoid isomerohydrolase	3
NP_000321.1	6247	RS1	300839	RS1, XLRS1	Retinoschisin	3
NP_000323.2	6310	ATXN1	601556	ATXN1, ATX1, SCA1	Ataxin-1	3
NP_000325.4	6329	SCN4A	603967	SCN4A, HYPP, NAC1A, HOKPP2, CMS16	Sodium channel, voltage-gated, type IV, alpha polypeptide	3
NP_000330.2	6559	SLC12A3	600968	SLC12A3, NCCT, TSC	Solute carrier family 12 (sodium/potassium/chloride transporters), member 3	3
NP_000331.1	6514	SLC2A2	138160	SLC2A2, GLUT2	Solute carrier family 2 (facilitated glucose transporter), member 2	3
NP_000332.2	6519	SLC3A1	104614	SLC3A1, ATR1, D2H, NBAT	Solute carrier family 3 (cystine, dibasic and neutral amino acid transporters), member 1	3
NP_000333.1	6521	SLC4A1	109270	SLC4A1, AE1, EPB3, SPH4, SAO, CHC	Solute carrier family 4, anion exchanger, member 1 (erythrocyte membrane protein band 3, Diego blood group)	3
NP_000334.1	6523	SLC5A1	182380	SLC5A1, SGLT1	Solute carrier family 5 (sodium/glucose transporter), member 1	3
NP_000335.1	6606	SMN1	600354	SMN1, SMA1, SMA2, SMA3, SMA4	Survival of motor neuron 1, telomeric	3
NP_000337.1	6662	SOX9	608160	SOX9, CMD1, SRA1	SRY (sex-determining region Y)-box 9	3
NP_000339.2	6716	SRD5A2	607306	SRD5A2	Steroid-5-alpha-reductase, alpha polypeptide-2 (3-oxo-5 alpha-steroid delta 4-dehydrogenase alpha-2)	3
NP_000340.2	6770	STAR	600617	STAR	Steroidogenic acute regulatory protein	3
NP_000341.2	24	ABCA4	601691	ABCA4, ABCR, STGD1, FFM, RP19, CORD3, ARMD2	ATP-binding transporter, retina-specific	3
NP_000344.1	6898	TAT	613018	TAT	Tyrosine aminotransferase, soluble	3
NP_000346.2	6948	TCN2	613441	TCN2, TC2	Transcobalamin II	3
NP_000349.1	7045	TGFBI	601692	TGFBI, CSD2, CDGG1, CSD, BIGH3, CDG2, EBMD	Transforming growth factor, beta-induced, 68kD	3
NP_000350.1	7051	TGM1	190195	TGM1, ICR2, ARCI1	Transglutaminase-1 (K polypeptide epidermal type I, protein-glutamine gamma-glutamyltransferase)	3
NP_000352.1	7056	THBD	188040	THBD, THRM, AHUS6, THPH12	Thrombomodulin	3
NP_000353.1	7078	TIMP3	188826	TIMP3, SFD	Tissue inhibitor of metalloproteinase-3	3
NP_000354.4	7137	TNNI3	191044	TNNI3, CMH7, CMD2A, RCM1, CMD1FF	Troponin-I, cardiac	3
NP_000358.1	7172	TPMT	187680	TPMT, TPMTD	Thiopurine S-methyltransferase	3
NP_000359.1	7248	TSC1	605284	TSC1, LAM	Hamartin (tuberous sclerosis 1 gene)	3
NP_000361.1	7274	TTPA	600415	TTPA, TTP1, AVED	Tocopherol, alpha, transfer protein	3
NP_000362.1	7276	TTR	176300	TTR, PALB	Transthyretin (prealbumin)	3
NP_000363.1	7299	TYR	606933	TYR, SHEP3, CMM8, OCA1A, ATN	Tyrosinase	3
NP_000364.1	7372	UMPS	613891	UMPS, OPRT	Uridine monophosphate synthetase (orotate phosphoribosyl transferase and orotidine-5'-decarboxylase)	3
NP_000365.3	7389	UROD	613521	UROD	Uroporphyrinogen decarboxylase	3
NP_000370.2	7498	XDH	607633	XDH, XAN1	Xanthine dehydrogenase (xanthine oxidase)	3
NP_000371.1	7507	XPA	611153	XPA, XPAC	XPA complementing gene	3
NP_000374.1	326	AIRE	607358	AIRE, APECED, APS1	Autoimmune regulator	3
NP_000375.2	338	APOB	107730	APOB, FLDB, LDLCQ4, FCHL2	Apolipoprotein B (including Ag(x) antigen)	3
NP_000378.1	788	SLC25A20	613698	SLC25A20, CACT, CAC	Solute carrier family 25 (carnitine/acylcarnitine translocase), member 20 (carnitine-acylcarnitine translocase)	3
NP_000381.1	1121	CHM	300390	CHM, TCD	Rab escort protein 1	3
NP_000382.3	1200	TPP1	607998	TPP1, CLN2, SCAR7	Tripeptidyl peptidase 1	3
NP_000383.1	1244	ABCC2	601107	ABCC2, CMOAT	ATP-binding cassette, subfamily C, member 2 (canalicular multispecific organic anion transporter)	3
NP_000384.2	1290	COL5A2	120190	COL5A2, EDSCL2	Collagen V, alpha-2 polypeptide	3
NP_000385.1	1409	CRYAA	123580	CRYAA, CRYA1, CTRCT9	Crystallin, alpha A	3
NP_000387.1	1513	CTSK	601105	CTSK	Cathepsin K	3
NP_000388.2	1536	CYBB	300481	CYBB, CGD, AMCBX2, IMD34	Cytochrome b-245, beta polypeptide	3
NP_000391.1	2068	ERCC2	126340	ERCC2, EM9, XPD, COFS2, TTD1	Excision repair cross complementing rodent repair deficiency, complementation group-2	3
NP_000393.4	2539	G6PD	305900	G6PD, G6PD1	Glucose-6-phosphate dehydrogenase	3
NP_000394.2	2582	GALE	606953	GALE	UDP galactose-4-epimerase	3
NP_000396.2	2760	GM2A	613109	GM2A	GM2 ganglioside activator protein	3
NP_000397.1	2798	GNRHR	138850	GNRHR, LHRHR, HH7	Gonadotropin-releasing hormone receptor	3
NP_000398.1	2812	GP1BB	138720	GP1BB, BS, BDPLT1	Glycoprotein Ib, platelet, beta polypeptide	3
NP_000401.1	3077	HFE	613609	HFE, HLA-H, HFE1, MVCD7, TFQTL2	Homeostatic iron regulator	3
NP_000407.1	3459	IFNGR1	107470	IFNGR1, IMD27A, IMD27B	Immune interferon, receptor for	3
NP_000408.1	3559	IL2RA	147730	IL2RA, CD25, IL2R, IDDM10, IMD41	Interleukin-2 receptor, alpha	3
NP_000409.1	3566	IL4R	147781	IL4R, IL4RA	Interleukin-4 receptor	3
NP_000410.2	3674	ITGA2B	607759	ITGA2B, GP2B, CD41B, GT, BDPLT2, BDPLT16	Integrin, alpha-2b (platelet glycoprotein IIb of IIb/IIIa complex, antigen CD41B)	3
NP_000413.1	3872	KRT17	148069	KRT17, PC2, PCHC1	Keratin 17	3
NP_000414.2	3849	KRT2	600194	KRT2, KRT2A, KRT2E	Keratin 2	3
NP_000415.2	3852	KRT5	148040	KRT5, DDD1	Keratin 5	3
NP_000418.2	4014	LOR	152445	LOR	Loricrin	3
NP_000419.1	4053	LTBP2	602091	LTBP2, LTBP3, GLC3D, MSPKA, WMS3	Latent transforming growth factor beta binding protein-2	3
NP_000420.1	4143	MAT1A	610550	MAT1A, MATA1, SAMS1	Methionine adenosyltransferase I, alpha	3
NP_000423.2	4633	MYL2	160781	MYL2, CMH10	Myosin, light polypeptide-2, regulatory, cardiac, slow	3
NP_000425.1	4758	NEU1	608272	NEU1, NEU, SIAL1	Neuraminidase 1 (lysosomal sialidase; sialidase 1)	3
NP_000426.2	4854	NOTCH3	600276	NOTCH3, CADASIL1, CASIL, IMF2, LMNS	Notch, Drosophila, homolog of, 3	3
NP_000427.1	5019	OXCT1	601424	OXCT1, OXCT, SCOT	3-oxoacid CoA transferase 1	3
NP_000430.3	5122	PCSK1	162150	PCSK1, NEC1, PC1, PC3, BMIQ12	Proprotein convertase subtilisin/kexin type 1	3
NP_000431.2	5145	PDE6A	180071	PDE6A, PDEA, RP43	Phosphodiesterase-6A, cGMP-specific, rod, alpha	3
NP_000435.3	5251	PHEX	300550	PHEX, HYP, HPDR1, LXHR	Phosphate regulating endopeptidase homolog, X-linked	3
NP_000437.3	5444	PON1	168820	PON1, PON, ESA, MVCD5	Paraoxonase-1	3
NP_000438.2	5664	PSEN2	600759	PSEN2, AD4, STM2, CMD1V	Presenilin 2	3
NP_000442.1	6473	SHOX	400020	SHOXY	Short stature homeo box, Y-linked	3
NP_000442.1	6473	SHOX	312865	SHOX, GCFX, SS, PHOG	Short stature homeo box	3
NP_000443.1	6555	SLC10A2	601295	SLC10A2, NTCP2, PBAM	Solute carrier family 10 (sodium/bile acid cotransporter family), member 2	3
NP_000445.1	6647	SOD1	147450	SOD1, ALS1, STAHP	Superoxide dismutase-1, soluble	3
NP_000449.1	6928	HNF1B	189907	HNF1B, TCF2, HNF2, MODY5, FJHN, HPC11	HNF1 homeobox B (transcription factor 2)	3
NP_000450.2	7010	TEK	600221	TEK, TIE2, VMCM, GLC3E	TEK tyrosine kinase, endothelial	3
NP_000454.1	54658	UGT1A1	191740	UGT1A1, UGT1, GNT1, BILIQTL1	UDP glycosyltransferase 1 family, polypeptide A1	3
NP_000457.1	5189	PEX1	602136	PEX1, ZWS1, PBD1A, PBD1B, HMLR1	Peroxisome biogenesis factor-1	3
NP_000465.1	7291	TWIST1	601622	TWIST1, ACS3, SCS, CRS1, SWCOS	TWIST, Drosophila, homolog of, 1	3
NP_000466.2	190	NR0B1	300473	NR0B1, DAX1, AHC, AHX, SRXY2	Nuclear receptor subfamily 0, group B, member 1	3
NP_000468.1	213	ALB	103600	ALB, ANALBA, FDAH	Albumin	3
NP_000469.3	249	ALPL	171760	ALPL, HOPS, TNSALP	Alkaline phosphatase, liver/bone/kidney	3
NP_000470.2	268	AMH	600957	AMH, MIF	Anti-Mullerian hormone	3
NP_000471.1	272	AMPD3	102772	AMPD3	Adenosine monophosphate deaminase-3, isoform E	3
NP_000472.2	275	AMT	238310	AMT, NKH, GCE	Aminomethyltransferase (glycine cleavage system protein T)	3
NP_000474.2	344	APOC2	608083	APOC2	Apolipoprotein C-II	3
NP_000475.1	351	APP	104760	APP, AAA, CVAP, AD1	Amyloid beta (A4) precursor protein	3
NP_000476.1	353	APRT	102600	APRT, APRTD	Adenine phosphoribosyltransferase	3
NP_000477.1	359	AQP2	107777	AQP2	Aquaporin-2 (collecting duct)	3
NP_000479.1	462	SERPINC1	107300	SERPINC1, AT3, AT3D, THPH7	Antithrombin III	3
NP_000480.3	546	ATRX	300032	ATRX, XH2, XNP, SHS, SFM1, MRXHF1	ATR-X gene (helicase 2; X-linked nuclear protein)	3
NP_000481.2	551	AVP	192340	AVP, AVRP, VP	Arginine vasopressin (neurophysin II, antidiuretic hormone)	3
NP_000483.3	1080	CFTR	602421	CFTR, ABCC7, CF, MRP7	Cystic fibrosis transmembrane conductance regulator (ATP-binding cassette, subfamily C, member 7)	3
NP_000485.3	1308	COL17A1	113811	COL17A1, BPAG2, ERED	Collagen XVII, alpha-1 polypeptide	3
NP_000487.1	1415	CRYBB2	123620	CRYBB2, CRYB2, CTRCT3, CCA2	Crystallin, beta-B2	3
NP_000488.3	1584	CYP11B1	610613	CYP11B1, P450C11, FHI	Cytochrome P450, subfamily XIB, polypeptide 1 (11-beta-hydroxylase; corticosteroid methyl-oxidase II (CMO II))	3
NP_000489.3	1585	CYP11B2	124080	CYP11B2	Cytochrome P450, subfamily XIB, polypeptide 2	3
NP_000491.4	1589	CYP21A2	613815	CYP21A2, CYP21, CA21H	Cytochrome P450, subfamily XXIA, polypeptide 2 (steroid 21-hydroxylase)	3
NP_000493.1	8288	EPX	131399	EPX, EPXD	Eosinophil peroxidase	3
NP_000495.1	2159	F10	613872	F10	Coagulation factor X	3
NP_000496.2	2161	F12	610619	F12, HAF, HAE3	Coagulation factor XII (Hageman factor)	3
NP_000497.1	2147	F2	176930	F2, THPH1, RPRGL2	Coagulation factor II (thrombin)	3
NP_000498.2	2203	FBP1	611570	FBP1	Fructose-bisphosphatase 1	3
NP_000499.1	2243	FGA	134820	FGA	Fibrinogen, alpha polypeptide	3
NP_000502.4	2524	FUT2	182100	FUT2, SE, B12QTL1	Fucosyltransferase-2 (secretor)	3
NP_000504.1	2652	OPN1MW	300821	OPN1MW, GCP, CBD, CBBM	Green cone pigment (opsin 1, medium-wave-sensitive)	3
NP_000506.2	2688	GH1	139250	GH1, GHN, IGHD1A, IGHD1B, IGHD2	Growth hormone-1	3
NP_000508.1	3040	HBA2	141850	HBA2, HBH, ECYT7	Hemoglobin alpha-2	3
NP_000509.1	3043	HBB	141900	HBB, ECYT6	Hemoglobin beta	3
NP_000510.1	3045	HBD	142000	HBD	Hemoglobin delta	3
NP_000512.1	3074	HEXB	606873	HEXB	Hexosaminidase B, beta polypeptide	3
NP_000513.2	3209	HOXA13	142959	HOXA13, HOX1J	Homeo box-A13	3
NP_000514.2	3239	HOXD13	142989	HOXD13, HOX4I, SPD1, BDSD	Homeo box-D13	3
NP_000515.2	3350	HTR1A	109760	HTR1A, ADRB2RL1, PFMCD	5-hydroxytryptamine (serotonin) receptor-1A	3
NP_000516.3	3767	KCNJ11	600937	KCNJ11, BIR, PHHI, HHF2, TNDM3, MODY13	Potassium inwardly-rectifying channel, subfamily J, member 11	3
NP_000517.2	3861	KRT14	148066	KRT14	Keratin 14	3
NP_000518.1	3949	LDLR	606945	LDLR, FHCL1, FHC, FH, LDLCQ2	Low density lipoprotein receptor	3
NP_000522.3	5009	OTC	300461	OTC	Ornithine transcarbamylase	3
NP_000524.3	5354	PLP1	300401	PLP1, PMD, HLD1, SPG2	Proteolipid protein 1	3
NP_000528.1	5972	REN	179820	REN, HNFJ2	Renin	3
NP_000529.1	5994	RFXAP	601861	RFXAP	Regulatory factor X-associated protein	3
NP_000530.1	6010	RHO	180380	RHO, RP4, OPN2, CSNBAD1	Rhodopsin (opsin 2)	3
NP_000531.2	6261	RYR1	180901	RYR1, MHS, CCO	Ryanodine receptor-1, skeletal	3
NP_000532.2	6295	SAG	181031	SAG, RP47	S-antigen; retina and pineal gland (arrestin)	3
NP_000534.3	6609	SMPD1	607608	SMPD1, NPD	Sphingomyelin phosphodiesterase-1, acid lysosomal	3
NP_000535.3	6891	TAP2	170261	TAP2, ABCB3, PSF2, RING11	Transporter 2, ATP-binding cassette, subfamily B	3
NP_000540.2	7252	TSHB	188540	TSHB, CHNG4	Thyroid-stimulating hormone, beta polypeptide	3
NP_000541.1	7306	TYRP1	115501	TYRP1, CAS2, GP75, SHEP11	Tyrosinase-related protein 1	3
NP_000542.1	7428	VHL	608537	VHL	von Hippel-Lindau tumor suppressor	3
NP_000543.2	7450	VWF	613160	VWF, F8VWF	Coagulation factor VIII VWF (von Willebrand factor)	3
NP_000544.2	7486	WRN	604611	RECQL2, RECQ3, WRN	DNA helicase, RecQ-like 2	3
NP_000545.1	1406	CRX	602225	CRX, CORD2, CRD, LCA7	Cone-rod homeo box-containing gene	3
NP_000546.2	1641	DCX	300121	DCX, DBCN, LISX	Doublecortin	3
NP_000549.1	3039	HBA1	141800	HBA1, HBH, METHBA, ECYT7	Hemoglobin alpha-1	3
NP_000550.2	3047	HBG1	142200	HBG1	Hemoglobin, gamma A	3
NP_000553.1	731	C8A	120950	C8A	Complement component-8, alpha polypeptide	3
NP_000560.6	2214	FCGR3A	146740	FCGR3A, CD16, IGFR3, IMD20	Fc fragment of IgG, low affinity III, receptor for (CD16)	3
NP_000563.1	3586	IL10	124092	IL10, CSIF, GVHDS	Interleukin-10	3
NP_000567.1	3553	IL1B	147720	IL1B	Interleukin-1, beta	3
NP_000569.3	6556	SLC11A1	600266	NRAMP1, NRAMP, SLC11A1	Solute carrier family 11 (proton-coupled divalent metal ion transporter), member 1	3
NP_000570.1	1234	CCR5	601373	CCR5, CMKBR5, CCCKR5, IDDM22	Chemokine (C-C) receptor 5	3
NP_000578.2	730	C7	217070	C7	Complement component-7	3
NP_000584.2	6890	TAP1	170260	TAP1, ABCB2, RING4, PSF1	Transporter 1, ATP-binding cassette, subfamily B	3
NP_000585.2	7124	TNF	191160	TNF, TNFA	Tumor necrosis factor (cachectin)	3
NP_000592.3	3082	HGF	142409	HGF, DFNB39	Hepatic growth factor	3
NP_000593.1	5054	SERPINE1	173360	PAI1, PLANH1, SERPINE1	Plasminogen activator inhibitor, type I	3
NP_000594.2	4846	NOS3	163729	NOS3	Nitric oxide synthase 3, endothelial cell	3
NP_000607.1	920	CD4	186940	CD4	CD4 antigen (p55)	3
NP_000610.2	3458	IFNG	147570	IFNG, IFG, IFI	Interferon, gamma	3
NP_000612.1	3356	HTR2A	182135	HTR2A	5-hydroxytryptamine (serotonin) receptor-2A	3
NP_000616.3	4843	NOS2	163730	NOS2A, NOS2	Nitric oxide synthase 2A, inducible, hepatocytes	3
NP_000619.3	3588	IL10RB	123889	CRFB4, IBD25	Cytokine receptor, family II, member 4	3
NP_000624.2	596	BCL2	151430	BCL2	B-cell CLL/lymphoma-2	3
NP_000625.1	3577	CXCR1	146929	CXCR1, IL8RA	Chemokine, CXC motif, receptor 1	3
NP_000627.2	6648	SOD2	147460	SOD2, MNSOD, MVCD6	Superoxide dismutase-2, mitochondrial	3
NP_000628.2	2936	GSR	138300	GSR, GSRD	Glutathione reductase	3
NP_000630.1	356	FASLG	134638	FASLG, TNFSF6, APT1LG1, FASL, ALPS1B	Fas ligand (TNF superfamily, member 6)	3
NP_000654.2	18	ABAT	137150	ABAT, GABAT	4-aminobutyrate aminotransferase	3
NP_000657.1	95	ACY1	104620	ACY1, ACY1D	Aminoacylase-1	3
NP_000659.2	125	ADH1B	103720	ADH1B, ADH2	Alcohol dehydrogenase IB (class I), beta polypeptide	3
NP_000660.1	126	ADH1C	103730	ADH1C, ADH3	Alcohol dehydrogenase IC (class I), gamma polypeptide	3
NP_000674.2	152	ADRA2C	104250	ADRA2C, ADRA2L2	Adrenergic, alpha-2C-, receptor	3
NP_000675.1	153	ADRB1	109630	ADRB1, ADRB1R, RHR, FNSS2	Adrenergic, beta-1-, receptor	3
NP_000681.2	217	ALDH2	100650	ALDH2	Aldehyde dehydrogenase 2 family, mitochondrial	3
NP_000684.2	220	ALDH1A3	600463	ALDH1A3, ALDH6, MCOP8	Aldehyde dehydrogenase 1 family, member A3	3
NP_000689.1	240	ALOX5	152390	ALOX5	Arachidonate 5-lipoxygenase	3
NP_000692.2	476	ATP1A1	182310	ATP1A1, CMT2DD, HOMGSMR2	ATPase, Na+K+ transporting, alpha-1 polypeptide	3
NP_000693.1	477	ATP1A2	182340	ATP1A2, FHM2, MHP2	ATPase, Na+K+ transporting, alpha-2 polypeptide	3
NP_000700.1	593	BCKDHA	608348	BCKDHA, MSUD1	Branched chain keto acid dehydrogenase E1, alpha polypeptide	3
NP_000709.1	774	CACNA1B	601012	CACNA1B, CACNL1A5, NEDNEH	Calcium channel, voltage-dependent, L type, alpha 1B subunit	3
NP_000717.2	785	CACNB4	601949	CACNB4, EJM6, EA5, EIG9	Calcium channel, voltage-dependent, beta 4 subunit	3
NP_000723.1	915	CD3D	186790	CD3D, T3D, IMD19	CD3D antigen, delta polypeptide (TiT3 complex)	3
NP_000724.1	916	CD3E	186830	CD3E, IMD18	CD3E antigen, epsilon polypeptide (TiT3 complex)	3
NP_000733.2	1135	CHRNA2	118502	CHRNA2	Cholinergic receptor, nicotinic, alpha polypeptide-2	3
NP_000734.2	1136	CHRNA3	118503	CHRNA3, LNCR2, PAOD2, BAIPRCK	Cholinergic receptor, neuronal nicotinic, alpha polypeptide-3	3
NP_000735.1	1137	CHRNA4	118504	CHRNA4, ENFL1	Cholinergic receptor, nicotinic, alpha polypeptide-4	3
NP_000736.2	1138	CHRNA5	118505	CHRNA5, LNCR2	Cholinergic receptor, neuronal nicotinic, alpha polypeptide-5	3
NP_000738.2	1140	CHRNB1	100710	CHRNB1, ACHRB, SCCMS, CMS2A, CMS2C	Cholinergic receptor, nicotinic, beta polypeptide-1, muscle	3
NP_000739.1	1141	CHRNB2	118507	CHRNB2, EFNL3	Cholinergic receptor, nicotinic, beta polypeptide-2	3
NP_000742.1	1144	CHRND	100720	CHRND, ACHRD, SCCMS, CMS3A, CMS3B, CMS3C	Cholinergic receptor, nicotinic, delta polypeptide	3
NP_000753.3	1548	CYP2A6	122720	CYP2A6, CYP2A3, CYP2A, P450C2A	Cytochrome P450, subfamily IIA, phenobarbital-inducible, polypeptide 6	3
NP_000758.1	1555	CYP2B6	123930	CYP2B6, CYP2B, EFVM	Cytochrome P450, family 2, subfamily B, polypeptide 6	3
NP_000760.1	1557	CYP2C19	124020	CYP2C, CYP2C19	Cytochrome P450, subfamily IIC (mephenytoin 4'-hydroxylase)	3
NP_000761.3	1558	CYP2C8	601129	CYP2C8, CYP2C8DM	Cytochrome P450, subfamily IIc, polypeptide 8	3
NP_000762.2	1559	CYP2C9	601130	CYP2C9	Cytochrome P450, subfamily IIC (mephenytoin 4-hydroxylase), polypeptide 9	3
NP_000768.1	1577	CYP3A5	605325	CYP3A5, P450PCN3	Cytochrome P450, subfamily IIIA, polypeptide 5	3
NP_000772.2	1583	CYP11A1	118485	CYP11A1, P450SCC	Cytochrome P450, subfamily XIA, polypeptide 1 (cholesterol side chain cleavage enzyme)	3
NP_000775.1	1593	CYP27A1	606530	CYP27A1, CYP27, CTX	Cytochrome P450, subfamily XXVIIA, polypeptide 1 (sterol 27-hydroxylase)	3
NP_000776.1	1594	CYP27B1	609506	CYP27B1, VDD1, PDDR	Cytochrome P450, subfamily XXVIIB, polypeptide 1	3
NP_000778.3	1621	DBH	609312	DBH, ORTHYP1	Dopamine-beta-hydroxylase	3
NP_000780.1	1636	ACE	106180	ACE, DCP1, ACE1, MVCD3, ICH	Angiotensin I converting enzyme (dipeptidyl carboxypeptidase-1)	3
NP_000781.1	1644	DDC	107930	DDC	DOPA decarboxylase (aromatic L-amino acid decarboxylase)	3
NP_000782.1	1719	DHFR	126060	DHFR	Dihydrofolate reductase	3
NP_000788.2	1815	DRD4	126452	DRD4	Dopamine receptor D4	3
NP_000789.1	1816	DRD5	126453	DRD5, DRD1B, DRD1L2	Dopamine receptor D5	3
NP_000790.2	2056	EPO	133170	EPO, MVCD2, ECYT5, DBAL	Erythropoietin	3
NP_000803.2	2560	GABRB1	137190	GABRB1, EIEE45	Gamma-aminobutyric acid (GABA) A receptor, beta-1	3
NP_000812.2	2677	GGCX	137167	GGCX, VKCFD1	Gamma-glutamyl carboxylase	3
NP_000814.2	2692	GHRHR	139191	GHRHR, GHRFR, IGHD4	Growth hormone releasing hormone receptor	3
NP_000815.1	2743	GLRB	138492	GLRB, HKPX2	Glycine receptor, beta subunit	3
NP_000816.4	2796	GNRH1	152760	GNRH1, LNRH, HH12	Gonadotropin-releasing hormone-1 (luteinizing-releasing hormone)	3
NP_000834.2	2916	GRM6	604096	GRM6, MGLUR6, CSNB1B	Glutamate receptor, metabotropic, 6	3
NP_000851.2	3248	HPGD	601688	HPGD, PGDH1, PHOAR1	Hydroxyprostaglandin dehydrogenase 15-(NAD)	3
NP_000867.2	3482	IGF2R	147280	IGF2R, MPRI	Insulin-like growth factor-2 receptor (mannose-6-phosphate receptor, cation-independent)	3
NP_000871.1	3574	IL7	146660	IL7	Interleukin-7	3
NP_000879.2	3694	ITGB6	147558	ITGB6, AI1H	Integrin, beta-6	3
NP_000882.1	3759	KCNJ2	600681	KCNJ2, HHIRK1, KIR2.1, IRK1, LQT7, SQT3, ATFB9	Potassium channel, inwardly rectifying, subfamily J, member 2	3
NP_000890.1	4254	KITLG	184745	KITLG, MGF, SF, SCF, SHEP7, FPHH, DCUA, DFNA69	KIT ligand (mast cell growth factor; steel, mouse, homolog of)	3
NP_000894.1	1728	NQO1	125860	NQO1, DIA4, NMOR1	NAD(P)H dehydrogenase, quinone 1 (diaphorase-4)	3
NP_000912.3	5139	PDE3A	123805	PDE3A, HTNB	Phosphodiesterase 3A, cGMP-inhibited	3
NP_000916.2	5162	PDHB	179060	PDHB, PDHBD	Pyruvate dehydrogenase, E1 beta polypeptide	3
NP_000927.1	5406	PNLIP	246600	PNLIP, PNLIPD	Pancreatic lipase	3
NP_000928.1	5430	POLR2A	180660	POLR2A, RPOL2, NEDHIB	Polymerase (RNA) II (DNA directed) polypeptide A, 220kD	3
NP_000932.3	5447	POR	124015	POR	Cytochrome P450 oxidoreductase	3
NP_000933.1	5479	PPIB	123841	PPIB, CYPB, OI9	Peptidyl-prolyl isomerase B	3
NP_000935.1	5530	PPP3CA	114105	PPP3CA, PPP2B, CALNA, CNA1, IECEE1, ACCIID	Protein phosphatase 3, catalytic subunit, alpha isoform (calcineurin A alpha)	3
NP_000944.1	5729	PTGDR	604687	PTGDR, AS1, ASRT1	Prostaglandin D2 receptor	3
NP_000947.2	5732	PTGER2	176804	PTGER2	Prostaglandin E receptor 2, EP2 subtype, 53kD	3
NP_000952.1	5740	PTGIS	601699	PTGIS, CYP8A1, PGIS, CYP8	Prostaglandin I2 synthase	3
NP_000960.2	6125	RPL5	603634	RPL5, DBA6	Ribosomal protein L5	3
NP_000966.2	6135	RPL11	604175	RPL11, DBA7	Ribosomal protein L11	3
NP_000970.1	6141	RPL18	604179	RPL18, DBA18	Ribosomal protein L18	3
NP_000973.2	6144	RPL21	603636	RPL21, HYPT12	Ribosomal protein L21	3
NP_001001433.1	8675	STX16	603666	STX16, SYN16	Syntaxin 16	3
NP_001001557.1	392255	GDF6	601147	GDF6, MCOP4, KFS1, MCOPCB6, LCA17, SYNS4	Growth/differentiation factor 6	3
NP_001001563.1	92609	TIMM50	607381	TIMM50, TIM50, MGCA9	Translocase of inner mitochondrial membrane 50, yeast, homolog of	3
NP_001002.1	6201	RPS7	603658	RPS7, DBA8	Ribosomal protein S7	3
NP_001002010.2	51251	NT5C3A	606224	NT5C3A, NT5C3, UMPH1, PSN1	5' nucleotidase, cytosolic IIIA (uridine 5' monophosphate hydrolase 1)	3
NP_001002029.3	721	C4B	120820	C4B, C4F, C4BD	Complement component-4B	3
NP_001002255.1	387082	SUMO4	608829	SUMO4, IDDM5	Small ubiquitin-like modifier 4	3
NP_001002755.1	27247	NFU1	608100	NFU1, HIRIP, MMDS1	NFU1 iron-sulfur cluster scaffold	3
NP_001003787.1	92335	STRADA	608626	STRADA, STRAD, LYK5	STE20-related kinase adaptor alpha	3
NP_001003800.1	23299	BICD2	609797	BICD2, KIAA0699, SMALED2A, SMALED2B	Bicaudal D, Drosophila, homolog of, 2	3
NP_001003811.1	56159	TEX11	300311	TEX11, SPGFX2	Testis-expressed gene 11	3
NP_001003841.1	340024	SLC6A19	608893	SLC6A19, HND	Solute carrier family 6 (neurotransmitter transporter), member 19	3
NP_001003945.1	210	ALAD	125270	ALAD, ALADH, PBGS	Aminolevulinate, delta-, dehydratase	3
NP_001004127.2	440138	ALG11	613666	ALG11, KIAA1266, CDG1P	ALG11 alpha-1,2-mannosyltransferase	3
NP_001004311.2	344018	FIGLA	608697	FIGLA, POF6	Folliculogenesis specific bHLH transcription factor	3
NP_001004334.3	440435	GPR179	614515	GPR179, GPR158L, GPR158L1, CSNB1E	G protein-coupled receptor 179	3
NP_001004434.1	7780	SLC30A2	609617	SLC30A2, ZNT2, TNZD	Solute carrier family 30 (zinc transporter), member 2	3
NP_001005216.2	442186	OR2J3	615016	OR2J3, C3HEXS	Olfactory receptor, family 2, subfamily J, member 3	3
NP_001005360.1	1785	DNM2	602378	DNM2, CMTDIB, CMTDI1, CMT2M, LCCS5	Dynamin-2	3
NP_001005752.1	2707	GJB3	603324	GJB3, CX31, DFNA2B, EKVP1	Gap junction protein, beta-3	3
NP_001005781.1	7341	SUMO1	601912	SUMO1, UBL1, SMT3, OFC10	Small ubiquitin-like modifier 1	3
NP_001006658.1	57539	WDR35	613602	WDR35, NAOFEN, KIAA1336, CED2, SRTD7	WD repeat-containing protein 35	3
NP_001006659.1	1380	CR2	120650	CR2, C3DR, SLEB9, CVID7	Complement component (3d/Epstein-Barr virus) receptor-2	3
NP_001007027.1	1822	ATN1	607462	ATN1, DRPLA, HRS, NOD, CHEDDA	Atrophin 1	3
NP_001007566.1	10342	TFG	602498	TFG, HMSNP, SPG57	TRK-fused gene	3
NP_001008216.1	493753	COA5	613920	COA5, C2orf64, PET191, CEMCOX3	Cytochrome c oxidase assembly factor 5	3
NP_001008223.1	51114	ZDHHC9	300646	ZDHHC9, DHHC9, MRXSZ	Zinc finger DHHC domain-containing protein 9	3
NP_001008389.1	493856	CISD2	611507	CISD2, WFS2, ZCD2, ERIS	CDGSH iron sulfur domain protein 2	3
NP_001008537.1	340533	NEXMIF	300524	NEXMIF, KIAA2022, MRX98	Neurite extension and migration factor	3
NP_001009185.1	23305	ACSL6	604443	ACSL6, FACL6, ACS2	Acyl-CoA synthetase long-chain family member 6	3
NP_001009994.1	134701	RIPPLY2	609891	RIPPLY2, C6orf59, SCDO6	Ripply2, zebrafish, homolog of	3
NP_001010867.1	200205	IBA57	615316	IBA57, C1orf69, MMDS3, SPG74	Iron-sulfur cluster assembly factor IBA57	3
NP_001010874.2	253017	TECRL	617242	TECRL, TERL, SRD5A2L2, GPSN2L, CPVT3	Trans-2,3-enoyl-CoA reductase-like protein	3
NP_001010892.1	345895	RSPH4A	612647	RSPH4A, CILD11	Radial spoke head component 4A	3
NP_001010898.1	388662	SLC6A17	610299	SLC6A17, NTT4, MRT48	Solute carrier family 6 (neurotransmitter transporter), member 17	3
NP_001012.1	6218	RPS17	180472	RPS17, RPS17L1, RPS17L2, DBA4	Ribosomal protein S17	3
NP_001012533.1	2235	FECH	612386	FECH, FCE, EPP1	Ferrochelatase	3
NP_001013642.1	144245	ALG10B	603313	ALG10B, KCR1, ALG10	ALG10 alpha-1,2-glucosyltransferase B	3
NP_001013725.2	440275	EIF2AK4	609280	EIF2AK4, GCN2, KIAA1338, PVOD2	Eukaryotic translation initiation factor 2-alpha kinase 4	3
NP_001013860.1	146206	CARMIL2	610859	CARMIL2, RLTPR, IMD58	Capping protein regulator and myosin 1 linker 2	3
NP_001014364.1	388698	FLG2	616284	FLG2, IFPS, PSS6	Filaggrin family, member 2	3
NP_001014763.1	2109	ETFB	130410	ETFB, MADD	Electron transfer flavoprotein, beta polypeptide	3
NP_001014989.2	27040	LAT	602354	LAT, IMD52	Linker for activation of T cells	3
NP_001015509.1	51651	PTRH2	608625	PTRH2, BIT1, IMNEPD	Peptidyl-tRNA hydrolase 2	3
NP_001015878.1	6795	AURKC	603495	AURKC, STK13, AIE2, SPGF5	Aurora kinase C	3
NP_001015880.1	9060	PAPSS2	603005	PAPSS2, ATPSK2, BCYM4	3'-phosphoadenosine 5'-phosphosulfate synthase 2	3
NP_001016.1	6228	RPS23	603683	RPS23, BTDD, MCINS	Ribosomal protein S23	3
NP_001017361.1	154288	KHDC3L	611687	KHDC3L, C6orf221, ECAT1, HYDM2	KH domain containing 3-like, subcortical maternal complex member	3
NP_001017402.1	3914	LAMB3	150310	LAMB3, AI1A	Laminin, beta-3 (nicein, 125kD; kalinin, 140kD; BM600, 125kD)	3
NP_001017922.1	114625	ERMAP	609017	ERMAP, SC, RD	Erythroblast membrane-associated protein	3
NP_001017979.1	9364	RAB28	612994	RAB28, CORD18	Ras-associated protein 28	3
NP_001017989.2	80207	OPA3	606580	OPA3, MGA3	OPA3 gene	3
NP_001018090.1	2488	FSHB	136530	FSHB, HH24	Follicle-stimulating hormone, beta polypeptide	3
NP_001018494.1	9698	PUM1	607204	PUM1, KIAA0099, SCA47	Pumilio RNA binding family member 1	3
NP_001019195.1	2643	GCH1	600225	GCH1, DYT5, HPABH4B	GTP cyclohydrolase 1	3
NP_001019801.3	860	RUNX2	600211	RUNX2, CBFA1, PEBP2A1, AML3, CCD, CLCD	Runt-related transcription factor 2	3
NP_001020.2	6231	RPS26	603701	RPS26, DBA10	Ribosomal protein S26	3
NP_001020018.1	7048	TGFBR2	190182	TGFBR2, HNPCC6, AAT3, MFS2, LDS2	Transforming growth factor, beta receptor II, 70-80kD	3
NP_001020029.1	6710	SPTB	182870	SPTB, SPH2, EL3, HS2	Spectrin, beta, erythrocytic	3
NP_001020114.1	435	ASL	608310	ASL	Argininosuccinate lyase	3
NP_001020366.1	1066	CES1	114835	CES1, SES1	Carboxylesterase 1 (monocyte/macrophage serine esterase 1)	3
NP_001020466.1	387733	IFITM5	614757	IFITM5, OI5	Interferon-induced transmembrane protein 5	3
NP_001020537.2	7422	VEGFA	192240	VEGF, MVCD1	Vascular endothelial growth factor	3
NP_001021.1	6232	RPS27	603702	RPS27, MPS1, DBA17	Ribosomal protein S27	3
NP_001022.1	6234	RPS28	603685	RPS28, DBA15	Ribosomal protein S28	3
NP_001025054.1	388939	C2orf71	613425	PCARE, C2orf71, RP54	Photoreceptor cilium actin regulator	3
NP_001025172.1	6235	RPS29	603633	RPS29, DBA13	Ribosomal protein S29	3
NP_001025180.1	6210	RPS15A	603674	RPS15A, DBA20	Ribosomal protein S15a	3
NP_001025482.1	375298	CERKL	608381	CERKL, RP26	Ceramide kinase-like	3
NP_001026859.1	9373	PLAA	603873	PLAA, PLAP, NDMSBA	Phospholipase A2-activating protein	3
NP_001026866.1	23646	PLD3	615698	PLD3, HUK4, SCA46	Phospholipase D family, member 3	3
NP_001026904.2	112812	FDX1L	614585	FDX2, FDX1L, MEOAL	Ferredoxin 2	3
NP_001027466.1	710	SERPING1	606860	C1NH, HAE1, HAE2, SERPING1	Complement component-1 inhibitor	3
NP_001027553.1	10084	PQBP1	300463	PQBP1, NPW38, SHS, MRX55, MRXS3, RENS1, MRXS8	Polyglutamine-binding protein 1	3
NP_001027565.1	3188	HNRNPH2	300610	HNRNPH2, NRPH2, MRXSB	Heterogeneous nuclear ribonucleoprotein H2	3
NP_001028675.1	51128	SAR1B	607690	SAR1B, CMRD, SARA2, ANDD	Sar1a, S. cerevisiae, homolog 2	3
NP_001029027.1	64421	DCLRE1C	605988	DCLRE1C, ARTEMIS, SCIDA	DNA cross-link repair protein 1C	3
NP_001029366.1	5393	EXOSC9	606180	EXOSC9, PMSCL1, PCH1D	Exosome component 9	3
NP_001030.2	6340	SCNN1G	600761	SCNN1G, PHA1, BESC3, LDLS2	Sodium channel, nonvoltage-gated 1, gamma	3
NP_001030025.1	6103	RPGR	312610	RPGR, RP3, CRD, RP15, COD1, CORDX1	Retinitis pigmentosa GTPase regulator	3
NP_001032.2	6476	SI	609845	SI	Sucrase-isomaltase	3
NP_001033692.2	153562	MARVELD2	610572	MARVELD2, MARVD2, TRIC, DFNB49	Marvel domain-containing protein 2 (tricellulin)	3
NP_001034200.1	131405	TRIM71	618570	TRIM71, LIN41, HYDCC1	Tripartite motif-containing protein 71	3
NP_001034221.1	3386	ICAM4	614088	ICAM4, CD242, LW	Intracellular adhesion molecule 4	3
NP_001034230.1	11078	TRIOBP	609761	TRIOBP, KIAA1662	Trio- and F-actin-binding protein	3
NP_001034658.1	130340	AP1S3	615781	AP1S3, PSORS15	Adaptor-related protein complex 1, sigma-3 subunit	3
NP_001034937.1	2879	GPX4	138322	GPX4, SMDS	Glutathione peroxidase-4 (phospholipid hydroperoxidase)	3
NP_001034965.1	163183	SYNE4	615535	SYNE4, NESP4, C19orf46, DFNB76	Spectrin repeat-containing nuclear envelope protein 4	3
NP_001035.1	6531	SLC6A3	126455	SLC6A3, DAT1, PKDYS1	Solute carrier family 6 (neurotransmitter transporter, dopamine), member 3	3
NP_001035022.1	974	CD79B	147245	CD79B, IGB, B29, AGM6	CD79B antigen	3
NP_001035047.1	145873	MESP2	605195	MESP2, SCDO2	Mesoderm posterior bHLH transcription factor 2	3
NP_001035203.1	4629	MYH11	160745	MYH11, AAT4, FAA4	Myosin, heavy polypeptide-11, smooth muscle	3
NP_001035237.1	8710	SERPINB7	603357	SERPINB7, MEGSIN, PPKN	Serpin peptidase inhibitor, clade B (ovalbumin), member 7	3
NP_001035241.1	55800	SCN3B	608214	SCN3B, SCNB3, BRGDA7, ATFB16	Sodium channel, voltage-gated, type III, beta subunit	3
NP_001035257.1	3955	LFNG	602576	LFNG, SCDO3	LFNG O-fucosylpeptide 3-beta-N-acetylglucosaminyltransferase	3
NP_001035526.1	51067	YARS2	610957	YARS2, TYRRS, MLASA2	Tyrosyl-tRNA synthetase 2	3
NP_001035757.1	3299	HSF4	602438	HSF4, CTM, CTRCT5	Heat-shock transcription factor 4	3
NP_001035878.1	169792	GLIS3	610192	GLIS3, ZNF515, NDH	GLIS family zinc finger protein 3	3
NP_001035897.1	1201	CLN3	607042	CLN3, BTS	Battenin	3
NP_001035930.1	5660	PSAP	176801	PSAP, SAP1	Prosaposin (sphingolipid activator protein-1)	3
NP_001035957.1	4763	NF1	613113	NF1, VRNF, WSS, NFNS	Neurofibromin (neurofibromatosis, type I)	3
NP_001035982.1	81624	DIAPH3	614567	DIAPH3, DIA2, DRF3, AUNA1, NSDAN	Diaphanous-related formin 3	3
NP_001035997.2	80347	COASY	609855	COASY, NBIA6, PCH12	Coenzyme A synthase	3
NP_001036.1	6532	SLC6A4	182138	SLC6A4, HTT, OCD1	Solute carrier family 6 (neurotransmitter transporter, serotonin), member 4	3
NP_001036002.1	10479	SLC9A6	300231	SLC9A6, NHE6	Solute carrier family 9 (sodium/hydrogen exchanger), member 6	3
NP_001036096.1	644096	SDHAF1	612848	SDHAF1	Succinate dehydrogenase complex assembly factor 1	3
NP_001036215.1	10735	STAG2	300826	STAG2, SA2, MKMS	Stromal antigen 2	3
NP_001037850.1	65062	TMEM237	614423	TMEM237, ALS2CR4, JBTS14	Transmembrane protein 237	3
NP_001050.1	6870	TACR3	162332	TACR3, NK3R, HH11	Tachykinin receptor 3	3
NP_001054.1	7018	TF	190000	TF, TFQTL1	Transferrin	3
NP_001056.1	7132	TNFRSF1A	191190	TNFRSF1A, TNFR1, TNFAR, FPF, MS5	Tumor necrosis factor receptor superfamily, member 1A	3
NP_001058.2	7153	TOP2A	126430	TOP2A, TOP2	Topoisomerase (DNA) II, alpha, 170kD	3
NP_001060.1	7280	TUBB2A	615101	TUBB2A, CDCBM5	Tubulin, beta-2A	3
NP_001070656.1	90161	HS6ST2	300545	HS6ST2, MRXSPM	Heparan sulfate 6-O-sulfotransferase 2	3
NP_001070675.1	22872	SEC31A	610257	SEC31A, SEC31L1, KIAA0905, NEDSOSB	SEC31 homolog A, COPII coat complex component	3
NP_001070818.1	8131	NPRL3	600928	NPRL3, CGTHBA, FFEVF3	Nitrogen permease regulator-like 3	3
NP_001070869.1	94	ACVRL1	601284	ACVRL1, ACVRLK1, ALK1, HHT2	Activin A receptor, type II-like kinase 1	3
NP_001070884.2	79583	TMEM231	614949	TMEM231, JBTS20, MKS11	Transmembrane protein 231	3
NP_001071121.1	57057	TBX20	606061	TBX20, ASD4	T-box 20	3
NP_001072.2	8029	CUBN	602997	CUBN, IFCR, MGA1	Cubilin (intrinsic factor-cobalamin receptor)	3
NP_001073007.1	7494	XBP1	194355	XBP1, XBP2	X-box-binding protein-1	3
NP_001073136.1	7080	NKX2-1	600635	NKX2-1, TITF1, NKX2A, TTF1, NMTC1	NK2 homeobox 1	3
NP_001073272.1	2548	GAA	606800	GAA	Glucosidase, acid alpha-	3
NP_001073286.1	3655	ITGA6	147556	ITGA6	Integrin, alpha-6	3
NP_001073327.1	10149	ADGRG2	300572	ADGRG2, GPR64, HE6, CBAVDX	Adhesion G protein-coupled receptor G2	3
NP_001073594.1	841	CASP8	601763	CASP8, MCH5, ALPS2B	Caspase 8, apoptosis-related cysteine protease	3
NP_001073882.3	135935	NOBOX	610934	NOBOX, POF5	NOBOX oogenesis homeobox	3
NP_001073883.2	440193	CCDC88C	611204	CCDC88C, HKRP2, DAPLE, KIAA1509, HYC1, SCA40	Coiled-coil domain-containing protein 88C	3
NP_001073911.1	146167	SLC38A8	615585	SLC38A8, FVH2	Solute carrier family 38 (amino acid transporter), member 8	3
NP_001073932.1	79659	DYNC2H1	603297	DYNC2H1, DNCH2, DHC2, ATD3, SRPS2B, SRTD3	Dynein, cytoplasmic-2, heavy chain-1	3
NP_001073936.1	4645	MYO5B	606540	MYO5B, KIAA1119	Myosin VB	3
NP_001073941.1	128486	FITM2	612029	FIT2, C20orf142, SIDDIS	Fat-inducing transcript 2	3
NP_001073945.1	389207	GRXCR1	613283	GRXCR1	Glutaredoxin, cysteine-rich, 1	3
NP_001073952.1	389827	MYMK	615345	MYMK, TMEM8C	Myomaker	3
NP_001073977.1	9096	TBX18	604613	TBX18, CAKUT2	T-box 18	3
NP_001073985.1	643226	GRXCR2	615762	GRXCR2, DFNB101	Glutaredoxin, cysteine-rich, 2	3
NP_001075.1	8985	PLOD3	603066	PLOD3, LH3	Procollagen-lysine, 2-oxoglutarate 5-dioxygenase 3 (lysyl hydroxylase 3)	3
NP_001075955.1	65057	ACD	609377	ACD, PTOP, PIP1, TINT1	ACD shelterin complex subunit and telomerase recruitment factor	3
NP_001076.2	12	SERPINA3	107280	SERPINA3, AACT, ACT	Alpha-1-antichymotrypsin	3
NP_001076007.1	79600	TCTN1	609863	TECT1, JBTS13	Tectonic family, member 1	3
NP_001076585.1	5551	PRF1	170280	PRF1, HPLH2, FLH2	Perforin	3
NP_001077368.2	51206	GP6	605546	GP6, GPIV, BDPLT11	Glycoprotein VI, platelet	3
NP_001077430.1	284403	WDR62	613583	WDR62, C19orf14, MCPH2	WD repeat-containing protein 62	3
NP_001078841.1	790955	UQCC3	616097	UQCC3, C11orf83, MC3DN9	Ubiquinol-cytochrome C reductase complex assembly factor 3	3
NP_001078927.1	1500	CTNND1	601045	CTNND1, CTNND, BCDS2	Catenin (cadherin-associated protein), delta 1	3
NP_001078956.1	114803	MYSM1	612176	MYSM1, 2ADUB, KIAA1915, BMFS4	MYB-like, SWIRM, and MPN domains-containing protein 1	3
NP_001080.2	21	ABCA3	601615	ABCA3, ABC3, SMDP3	ATP-binding cassette-3	3
NP_001089.1	50	ACO2	100850	ACO2, ICRD, OPA9	Aconitase, mitochondrial	3
NP_001091.1	58	ACTA1	102610	ACTA1, ASMA, NEM3, CFTD1, SHPM	Actin, alpha-1, skeletal muscle	3
NP_001091109.1	2525	FUT3	111100	FUT3, LE	Fucosyltransferase 3	3
NP_001091680.1	1499	CTNNB1	116806	CTNNB1, NEDSDV, EVR7	Catenin (cadherin-associated protein), beta 1, 88kD	3
NP_001091868.1	1314	COPA	601924	COPA, AILJK	Coatomer protein complex, subunit alpha	3
NP_001091896.1	6603	SMARCD2	601736	SMARCD2, BAF60B, SGD2	SWI/SNF-related, matrix-associated, actin-dependent regulator of chromatin, subfamily d, member 2	3
NP_001091952.1	23373	CRTC1	607536	CRTC1, MECT1, KIAA0616, FLJ14027	CREB-regulated transcription coactivator 1	3
NP_001091956.1	10786	SLC17A3	611034	SLC17A3, NPT4, UAQTL4, GOUT4	Solute carrier family 17 (sodium phosphate cotransporter), member 3	3
NP_001091981.1	3796	KIF2A	602591	KIF2A, CDCBM3	Kinesin, heavy chain, 2	3
NP_001092.1	60	ACTB	102630	ACTB, BRWS1	Actin, beta	3
NP_001092094.1	4281	MID1	300552	MID1, OGS1, BBBG1, FXY, OSX	Midline-1	3
NP_001092142.1	341208	HEPHL1	618455	HEPHL1, ZP, HJDD	Hephaestin-like protein 1	3
NP_001092272.1	84131	CEP78	617110	CEP78, CRDHL	Centrosomal protein, 78kD	3
NP_001092693.1	80173	IFT74	608040	IFT74, CCDC2, CMG1, BBS20	Intraflagellar transport 74	3
NP_001092744.1	26277	TINF2	604319	TINF2, TIN2, DKCA3	TRF1-interacting nuclear factor 2	3
NP_001092757.1	348938	NIPAL4	609383	NIPAL4, ICHYN, ARCI6	NIPA-like domain-containing 4	3
NP_001092872.1	8812	CCNK	603544	CCNK, IDDHDF	Cyclin K	3
NP_001092874.1	6331	SCN5A	600163	SCN5A, LQT3, VF1, HB1, SSS1, CMD1E, CDCD2	Sodium channel, voltage-gated, type V, alpha polypeptide	3
NP_001093137.1	387715	ARMS2	611313	LOC387715, ARMD8	LOC387715 gene	3
NP_001093326.2	8517	IKBKG	300248	IKBKG, NEMO, FIP3, IP, IPD2, AMCBX1, IMD33, EDAID1	Inhibitor of kappa light polypeptide gene enhancer in B cells, kinase of, gamma (NF-kappa-B essential modulator)	3
NP_001093896.1	5910	RAP1GDS1	179502	RAP1GDS1	RAP1, GTP-GDP dissociation stimulator 1	3
NP_001094.1	88	ACTN2	102573	ACTN2, CMD1AA, CMH23, MYOCOZ, MPD6	Actinin, alpha-2	3
NP_001094832.1	390594	KBTBD13	613727	KBTBD13, NEM6	Kelch repeat and BTB/POZ domains-containing protein 13	3
NP_001094896.1	729920	ISPD	614631	ISPD, MDDGA7, MDDGC7, LGMDR20	Isoprenoid synthase domain-containing protein	3
NP_001095886.1	3827	KNG1	612358	KNG1, KNG	Kininogen 1	3
NP_001095939.1	643418	LIPN	613924	LIPN, LIPL4, ARCI8, LI4	Lipase family, member N	3
NP_001096617.1	26058	GIGYF2	612003	GIGYF2, KIAA0642, PARK11	GRB10-interacting GYF protein 2	3
NP_001098101.1	5144	PDE4D	600129	PDE4D, DPDE3, ACRDYS2	Phosphodiesterase-4D, cAMP-specific (dunce, Drosophila, homolog of, phosphodiesterase-E3)	3
NP_001098676.2	3910	LAMA4	600133	LAMA4, LAMA3, CMD1JJ	Laminin, alpha-4	3
NP_001099028.1	494551	WEE2	614084	WEE2, WEE1B, OOMD5	Wee1, S. pombe, homolog of, 2	3
NP_001101.1	102	ADAM10	602192	ADAM10, MADM, RAK, AD18	ADAM metallopeptidase domain 10	3
NP_001103279.2	346171	ZFP57	612192	ZFP57, TNDM1	Zinc finger protein 57, mouse, homolog of	3
NP_001103348.1	50945	TBX22	300307	TBX22, CPX, ABERS	T-box 22	3
NP_001103690.1	10804	GJB6	604418	GJB6, CX30, DFNA3B, DFNB1B, ECTD2, HED2	Gap junction protein, beta-6 (connexin-30)	3
NP_001103824.1	7784	ZP3	182889	ZP3, ZP3A, ZP3B, OOMD3	Zona pellucida glycoprotein-3 (sperm receptor)	3
NP_001104026.1	2316	FLNA	300017	FLNA, FLN1, NHBP, OPD1, OPD2, FMD, MNS, CVD1, CSBS, FGS2	Filamin A, alpha (actin-binding protein-280)	3
NP_001104262.1	4204	MECP2	300005	MECP2, RTT, PPMX, MRX16, MRX79, AUTSX3, MRXSL, MRXS13	Methyl-CpG-binding protein-2	3
NP_001106175.1	11023	VAX1	604294	VAX1, MCOPS11	Ventral anterior homeo box 1	3
NP_001106212.1	3746	KCNC1	176258	KCNC1, EPM7	Potassium voltage-gated channel, Shaw-related subfamily, member 1	3
NP_001106849.1	55215	FANCI	611360	FANCI, KIAA1794	FANCI gene	3
NP_001107558.1	53405	CLIC5	607293	CLIC5, DFNB103	Chloride intracellular channel 5	3
NP_001108220.1	339453	TMEM240	616101	TMEM240, C1orf70, SCA21	Transmembrane protein 240	3
NP_001108225.1	2022	ENG	131195	ENG, END, HHT1, ORW	Endoglin	3
NP_001116078.1	3920	LAMP2	309060	LAMP2, LAMPB, LGP110, DND	Lysosome-associated membrane protein-2	3
NP_001116105.1	1373	CPS1	608307	CPS1, PHN	Carbamoyl-phosphate synthetase 1, mitochondrial	3
NP_001116229.1	5449	POU1F1	173110	POU1F1, PIT1, CPHD1	POU domain, class 1, transcription factor 1 (Pit1, growth hormone factor 1)	3
NP_001116423.1	2532	ACKR1	613665	ACKR1, DARC, FY, GPD, WBCQ1	Atypical chemokine receptor 1 (Duffy antigen receptor for chemokines)	3
NP_001116427.1	26580	BSCL2	606158	BSCL2, SPG17, HMN5, PELD	Seipin	3
NP_001116513.2	729230	CCR2	601267	CCR2, CMKBR2	Chemokine (C-C) receptor 2	3
NP_001116698.1	25821	MTO1	614667	MTO1, COXPD10	Mitochondrial tRNA translation optimization 1	3
NP_001118.3	162	AP1B1	600157	AP1B1, ADTB1, BAM22, CLAPB2, KIDAR	Adaptor-related protein complex 1, beta 1 subunit (adaptin, beta)	3
NP_001119521.1	100144748	KLLN	612105	KLLN, CWS4	Killin	3
NP_001119584.1	7157	TP53	191170	TP53, P53, LFS1 , BCC7, BMFS5	Tumor protein p53	3
NP_001119594.1	60386	SLC25A19	606521	SLC25A19, DNC, MUP1, MCPHA, THMD3, THMD4	Solute carrier family 25 (mitochondrial deoxynucleotide carrier), member 19	3
NP_001119600.1	60675	PROK2	607002	PROK2, PK2, BV8, HH4	Prokineticin 2	3
NP_001120.3	165	AEBP1	602981	AEBP1, ACLP	AE-binding protein 1	3
NP_001120650.1	54872	PIGG	616918	PIGG, GPI7, MRT53	Phosphatidylinositol glycan anchor biosynthesis class G protein	3
NP_001120654.1	55165	CEP55	610000	CEP55, MARCH	Centrosomal protein, 55kD	3
NP_001120664.1	7555	CNBP	116955	CNBP, ZNF9, CNBP1, DM2, PROMM	CCHC-type zinc finger nucleic acid-binding protein	3
NP_001120679.1	50485	SMARCAL1	606622	SMARCAL1, HARP, SIOD	SWI/SNF related, matrix associated, actin dependent regulator of chromatin, subfamily A-like	3
NP_001120963.2	3689	ITGB2	600065	ITGB2, CD18, LCAMB, LAD	Integrin, beta-2 (antigen CD18 (p95), lymphocyte function-associated antigen-1; macrophage antigen, beta polypeptide)	3
NP_001121070.1	3481	IGF2	147470	IGF2, GRDF	Insulin-like growth factor-2, or somatomedin A	3
NP_001121082.1	570	BAAT	602938	BAAT	Bile acid coenzyme A:amino acid N-acyltransferase (glycine N-choloyltransferase)	3
NP_001121117.1	2554	GABRA1	137160	GABRA1, EJM5, ECA4, EIEE19	Gamma-aminobutyric acid (GABA) A receptor, alpha-1	3
NP_001121121.1	55670	PEX26	608666	PEX26, PBD7A, PBD7B	Peroxisome biogenesis factor 26	3
NP_001121132.1	9927	MFN2	608507	MFN2, KIAA0214, CMT2A2A, HMSN6A, CMT2A2B	Mitofusin 2	3
NP_001121170.1	11005	SPINK5	605010	SPINK5, LEKTI	Serine protease inhibitor, Kazal type, 5	3
NP_001121172.1	5265	SERPINA1	107400	SERPINA1, PI, AAT	Alpha-1-antitrypsin (serpin peptidase inhibitor, clade A, member 1)	3
NP_001121367.1	64377	CHST8	610190	CHST8, GALNAC4ST1, PSS3	Carbohydrate sulfotransferase 8	3
NP_001121557.1	443	ASPA	608034	ASPA	Aspartoacylase (aminoacylase-2)	3
NP_001121620.1	7037	TFRC	190010	TFRC, TFR, CD71, IMD46	Transferrin receptor	3
NP_001121631.1	55275	VPS53	615850	VPS53, HCCS1, PCH2E	VPS53 subunit of GARP complex	3
NP_001121699.1	10020	GNE	603824	GNE, GLCNE, IBM2, DMRV, NM	UDP-N-acetylglucosamine 2-epimerase/N-acetylmannosamine kinase	3
NP_001121700.2	286262	TPRN	613354	TPRN, C9orf75, DFNB79	Taperin	3
NP_001121897.1	4595	MUTYH	604933	MUTYH, MYH	mutY DNA glycosylase	3
NP_001121901.1	56916	SMARCAD1	612761	SMARCAD1, KIAA1122, ETL1, HEL1, ADERM, BASNS, HRZ	SWI/SNF-related, matrix-associated actin-dependent regulator of chromatin, subfamily A, DEAD/H box-containing, 1	3
NP_001122060.3	6563	SLC14A1	613868	SLC14A1, JK, UTE, UT1	Solute carrier family 14 (urea transporter), member 1 (Kidd blood group)	3
NP_001122080.1	23005	MAPKBP1	616786	MAPKBP1, JNKBP1, NPHP20	Mitogen-activated protein kinase-binding protein 1	3
NP_001122307.2	6399	TRAPPC2	300202	TRAPPC2, SEDL, SEDT	Trafficking protein particle complex 2 (sedlin)	3
NP_001122390.2	4140	MARK3	602678	MARK3, VIPB	MAP/microtubule affinity-regulating kinase-3	3
NP_001123561.1	3735	KARS	601421	KARS1, KARS, CMTRIB, DFNB89	Lysyl-tRNA synthetase 1	3
NP_001123577.1	10087	COL4A3BP	604677	COL4A3BP, GPBP, CERT, MRD34	COL4A3-binding protein (ceramide transporter)	3
NP_001123645.1	4602	MYB	189990	MYB	Avian myeloblastosis viral (v-myb) oncogene homolog	3
NP_001123914.1	3265	HRAS	190020	HRAS	Harvey rat sarcoma viral (v-Ha-ras) oncogene homolog	3
NP_001124151.1	1977	EIF4E	133440	EIF4E, EIF4EL1, AUTS19	Eukaryotic translation initiation factor 4E	3
NP_001124154.1	2982	GUCY1A1	139396	GUCY1A3, GUC1A3, GUCSA3, MYMY6	Guanylate cyclase 1, soluble, alpha 3	3
NP_001124295.1	1786	DNMT1	126375	DNMT1, MCMT, HSN1E, ADCADN	DNA methyltransferase 1	3
NP_001124436.1	5333	PLCD1	602142	PLCD1, NDNC3	Phospholipase C, delta-1	3
NP_001124441.1	26012	NSMF	608137	NSMF, NELF, HH9	NMDA receptor synaptonuclear signaling and neuronal migration factor	3
NP_001124506.1	285498	RNF212	612041	RNF212, ZHP3	Ring finger protein 212	3
NP_001125.1	174	AFP	104150	AFP, HPAFP, AFPD	Alpha-fetoprotein	3
NP_001127835.2	282996	RBM20	613171	RBM20	RNA-binding motif protein 20	3
NP_001127925.1	147409	DSG4	607892	DSG4, LAH, HYPT6	Desmoglein 4	3
NP_001128179.1	1757	SARDH	604455	SARDH, SARD, SAR	Sarcosine dehydrogenase	3
NP_001128243.1	57468	SLC12A5	606726	SLC12A5, KCC2, KIAA1176, EIEE34, EIG14	Solute carrier family 12, (potassium-chloride transporter) member 5	3
NP_001129.1	181	AGRP	602311	AGRP, ART, AGRT	Agouti-related neuropeptide	3
NP_001129071.1	7042	TGFB2	190220	TGFB2, LDS4	Transforming growth factor, beta-2	3
NP_001129131.1	9378	NRXN1	600565	NRXN1, PTHSL2, SCZD17	Neurexin 1	3
NP_001129471.1	9853	RUSC2	611053	RUSC2, KIAA0375, IPORIN, MRT61	RUN and SH3 domain-containing 2	3
NP_001129497.1	5358	PLS3	300131	PLS3, BMND18	Plastin 3	3
NP_001129507.1	55621	TRMT1	611669	TRMT1, TRM1, MRT68	tRNA methyltransferase 1	3
NP_001129666.1	22868	FASTKD2	612322	FASTKD2, KIAA0971	FAST kinase domains 2	3
NP_001129711.1	93166	PRDM6	616982	PRDM6, PRISM, PDA3	PR domain-containing protein 6	3
NP_001129743.2	137814	NKX2-6	611770	NKX2-6, CSX2, CTHM	NK2, Drosophila, homolog of, 6	3
NP_001129965.1	84879	MFSD2A	614397	MFSD2A, MCPH15	Major facilitator superfamily domain-containing protein 2A	3
NP_001130.1	242	ALOX12B	603741	ALOX12B, ARCI2	Archidonate 12-lipoxygenase, R type	3
NP_001132929.1	10134	BCAP31	300398	BCAP31, BAP31, DXS1357E, DDCH	B-cell receptor-associated protein 31	3
NP_001132938.1	6907	TBL1X	300196	TBL1X, TBL1, CHNG8	Transducin-beta-like 1, X-linked	3
NP_001135757.1	6229	RPS24	602412	RPS24, DBA3	Ribosomal protein S24	3
NP_001135764.1	81562	LMAN2L	609552	LMAN2L, VIPL, MRT52	LMAN2-like protein	3
NP_001135858.1	5165	PDK3	300906	PDK3, CMTX6	Pyruvate dehydrogenase kinase, isoenzyme 3	3
NP_001135888.1	9255	AIMP1	603605	AIMP1, SCYE1, EMAP2, EMAPII, HLD3	ARS-interacting multifunctional protein 1	3
NP_001135931.2	136371	ASB10	615054	ASB10, GLC1F	Ankyrin repeat- and SOCS box-containing protein 10	3
NP_001136.1	283	ANG	105850	ANG, RNASE5, ALS9	Angiogenin	3
NP_001136028.1	3161	HMMR	600936	HMMR	Hyaluronan-mediated motility receptor (RHAMM)	3
NP_001136043.1	5892	RAD51D	602954	RAD51D, RAD51L3, BROVCA4	RAD51 paralog D	3
NP_001136071.1	8974	P4HA2	600608	P4HA2, MYP25	Procollagen-proline, 2-oxoglutarate-4-dioxygenase, alpha subunit, isoform 2	3
NP_001136105.1	23533	PIK3R5	611317	PIK3R5, p101	Phosphatidylinositol 3-kinase, regulatory subunit 5	3
NP_001136202.1	284252	KCTD1	613420	KCTD1, SENS	Potassium channel tetramerization domain-containing 1	3
NP_001136235.1	65217	PCDH15	605514	PCDH15, DFNB23, USH1F	Protocadherin 15	3
NP_001136256.1	3590	IL11RA	600939	IL11RA, CRSDA	Interleukin-11 receptor, alpha	3
NP_001136336.2	9780	PIEZO1	611184	PIEZO1, FAM38A, MIB, DHS, LMPHM6	PIEZO1 ion channel	3
NP_001137235.1	93426	SYCE1	611486	SYCE1, POF12, SPGF15	Synaptonemal complex central element protein 1	3
NP_001137251.1	28981	IFT81	605489	IFT81, DV1, CDV1R, SRTD19	Intraflagellar transport 81	3
NP_001137453.1	91851	CHRDL1	300350	CHRDL1, VOPT, MGC1	Chordin-like 1	3
NP_001137463.1	55135	WRAP53	612661	WRAP53, TCAB1, WDR79, DKCB3	WD repeat-containing protein antisense to TP53	3
NP_001138341.1	387787	LIPT2	617659	LIPT2	Lipoyl(octanoyl) transferase 2	3
NP_001138350.1	3612	IMPA1	602064	IMPA1, MRT59	Inositol(myo)-1(or 4)-monophosphatase-1	3
NP_001138354.1	144165	PRICKLE1	608500	PRICKLE1, RILP, EPM1B	Prickle-like 1	3
NP_001138545.1	389856	USP27X	300975	USP27X, USP22L, MRX105	Ubiquitin-specific protease 27, X-linked	3
NP_001138724.1	5199	CFP	300383	PFC, PFD	Properdin P factor, complement	3
NP_001138778.1	1021	CDK6	603368	CDK6, PLSTIRE, MCPH12	Cyclin-dependent kinase 6	3
NP_001138881.1	4841	NONO	300084	NONO, NRB54, MRXS34	Non-Pou domain-containing octamer (ATGCAAAT) binding protein (nuclear RNA-binding protein, 54-kD)	3
NP_001138984.1	4774	NFIA	600727	NFIA, BRMUTD	Nuclear factor I/A	3
NP_001139133.1	2624	GATA2	137295	GATA2, DCML, MONOMAC, IMD21	GATA-binding protein-2	3
NP_001139248.1	2289	FKBP5	602623	FKBP5, FKBP51	FK506-binding protein 5	3
NP_001139266.1	118429	ANTXR2	608041	ANTXR2, CMG2, HFS	Anthrax toxin receptor 2	3
NP_001139301.1	7136	TNNI2	191043	TNNI2, AMCD2B, DA2B1, FSSV	Troponin I, fast-twitch skeletal muscle isoform	3
NP_001139328.1	6452	SH3BP2	602104	SH3BP2, CRPM	SH3-domain binding protein 2	3
NP_001139332.1	10940	POP1	602486	POP1, ANXD2	POP1 homolog, ribonuclease P/MRP subunit	3
NP_001139345.1	925	CD8A	186910	CD8A	CD8 antigen, alpha polypeptide (p32)	3
NP_001139373.1	54938	SARS2	612804	SARS2	Seryl-tRNA synthetase 2	3
NP_001139478.1	3483	IGFALS	601489	IGFALS, ALS, ACLSD	Insulin-like growth factor-binding protein, acid-labile subunit	3
NP_001139512.1	2741	GLRA1	138491	GLRA1, STHE, HKPX1	Glycine receptor, alpha-1 polypeptide	3
NP_001139550.1	23562	CLDN14	605608	CLDN14, DFNB29	Claudin 14	3
NP_001139784.1	93649	MYOCD	606127	MYOCD, MGBL	Myocardin	3
NP_001142.2	291	SLC25A4	103220	SLC25A4, ANT1, T1, PEO3, PEO2, MTDPS12A, PEOA2	Solute carrier family 25 (mitochondrial carrier) member 4 (adenine nucleotide translocator-1, skeletal muscle)	3
NP_001145.1	308	ANXA5	131230	ANXA5, ENX2, RPRGL3	Annexin A5 (endonexin II)	3
NP_001152759.1	7167	TPI1	190450	TPI1, TPID	Triosephosphate isomerase-1	3
NP_001153048.1	6337	SCNN1A	600228	SCNN1A, BESC2, LIDLS3	Sodium channel, nonvoltage-gated 1, alpha	3
NP_001153212.1	4049	LTA	153440	LTA, TNFB	Lymphotoxin alpha (formerly tumor necrosis factor beta)	3
NP_001153605.1	56479	KCNQ5	607357	KCNQ5, MRD46	Potassium channel, voltage-gated, KQT-like subfamily, member 5	3
NP_001155002.1	1438	CSF2RA	306250	CSF2RA, SMDP4	Colony-stimulating factor-2 receptor, alpha, low-affinity, granulocyte-macrophage	3
NP_001155201.1	5320	PLA2G2A	172411	PLA2G2A, PLA2B, PLA2L, MOM1	Phospholipase A2, group IIA, platelets, synovial fluid	3
NP_001155969.1	10161	LPAR6	609239	LPAR6, P2RY5, P2Y5, LAH3, ARWH1, HYPT8	Lysophosphatidic acid receptor 6	3
NP_001157032.1	254528	MEIOB	617670	MEIOB, SPGF22	Meiosis-specific protein with OB domains	3
NP_001157281.1	124997	WDR81	614218	WDR81, CAMRQ2, HYC3	WD repeat-containing protein 81	3
NP_001157289.1	1717	DHCR7	602858	DHCR7, SLOS	Delta-7-dehydrocholesterol reductase	3
NP_001157616.1	283489	CHAMP1	616327	CHAMP1, ZNF828, C13orf8, KIAA1802, MRD40	Chromosome alignment-maintaining phosphoprotein 1	3
NP_001157741.1	5888	RAD51	179617	RAD51, RECA, MRMV2, FANCR	RAD51 recombinase	3
NP_001157750.1	2542	SLC37A4	602671	SLC37A4, G6PT1	Solute carrier family 37 (glucose-6-phosphate transporter), member 4	3
NP_001157789.1	2317	FLNB	603381	FLNB, SCT, AOI, LRS1	Filamin B	3
NP_001157814.1	26137	ZBTB20	606025	ZBTB20, ZNF288, DPZF, PRIMS	Zinc finger and BTB-domain containing 20	3
NP_001157877.1	727857	BHLHA9	615416	BHLHA9, BHLHF42, MSSD, CCSPD	Basic helix-loop-helix family, member A9	3
NP_001157968.1	55779	CFAP44	617559	CFAP44, WDR52, SPGF20	Cilia- and flagella-associated protein 44	3
NP_001158.2	331	XIAP	300079	XIAP, BIRC4, API3, XLP2	Inhibitor of apoptosis, X-linked	3
NP_001158009.1	27185	DISC1	605210	DISC1, SCZD9	Disrupted in schizophrenia 1	3
NP_001158087.1	8323	FZD6	603409	FZD6, NDNC10	Frizzled class receptor 6	3
NP_001158089.1	2719	GPC3	300037	GPC3, SDYS, SGBS1	Glypican 3	3
NP_001158137.1	57670	KIAA1549	613344	KIAA1549, RP86	KIAA1549 gene	3
NP_001158209.1	799	CALCR	114131	CALCR, CRT	Calcitonin receptor	3
NP_001158312.1	57128	LYRM4	613311	LYRM4, ISD11, C6orf149, COXPD19	LYR motif-containing protein 4	3
NP_001158509.1	2558	GABRA5	137142	GABRA5, EIEE79	Gamma-aminobutyric acid (GABA) A receptor, alpha-5	3
NP_001158886.1	3939	LDHA	150000	LDHA, LDH1, GSD11	Lactate dehydrogenase A	3
NP_001159432.1	59344	ALOXE3	607206	ALOXE3, ARCI3	Arachidonate lipoxygenase 3	3
NP_001159446.1	131669	UROC1	613012	UROC1, UROCD	Urocanase domain-containing protein 1	3
NP_001159583.1	10908	PNPLA6	603197	PNPLA6, NTE, SPG39, NTEMND, BNHS, LNMS, OMCS	Patatin-like phospholipase domain-containing protein 6	3
NP_001159592.1	3284	HSD3B2	613890	HSD3B2	Hydroxy-delta-5-steroid dehydrogenase, 3 beta- and steroid delta-isomerase, type 2 (adrenal, gonadal)	3
NP_001159725.1	6916	TBXAS1	274180	TBXAS1, GHOSAL, CYP5, BDPLT14	Thromboxane A synthase 1, platelet	3
NP_001160135.1	51744	CD244	605554	CD244, NAIL, NKR2B4, SLAMF4	CD244 antigen	3
NP_001161.1	364	AQP7	602974	AQP7, GLYCQTL	Aquaporin-7	3
NP_001161067.1	23600	AMACR	604489	AMACR, CBAS4, AMACRD	Alpha-methylacyl-CoA racemase	3
NP_001161206.1	57176	VARS2	612802	VARS2, KIAA1885, COXPD20	Valyl-tRNA synthetase 2	3
NP_001161829.1	7941	PLA2G7	601690	PLA2G7, PAFAH, PAFAD	Phospholipase A2, group VII (platelet-activating factor acetylhydrolase)	3
NP_001161861.2	10370	CITED2	602937	CITED2, MRG1, P35SRJ, VSD2, ASD8	CBP/p300-interacting transactivator, with glu/asp-rich C-terminal domain, 2	3
NP_001162580.1	9997	SCO2	604272	SCO2, CEMCOX1, MYP6	SCO2 cytochrome c oxidase assembly protein	3
NP_001162625.1	139212	PIH1D3	300933	PIH1D3, CILD36	PIH1 domain-containing protein 3	3
NP_001163887.1	9414	TJP2	607709	TJP2, ZO2, PFIC4	Tight junction protein 2	3
NP_001164100.1	57680	CHD8	610528	CHD8, DUPLIN, KIAA1564, AUTS18	Chromodomain helicase DNA-binding protein 8	3
NP_001164626.1	100131801	PET100	614770	PET100, C19orf79	PET100 cytochrome c oxidase chaperone	3
NP_001164645.1	1524	CX3CR1	601470	CX3CR1, GPR13, V28	Chemokine (C-X3-C) receptor 1 (G protein-coupled receptor-13)	3
NP_001164672.1	51271	UBAP1	609787	UBAP1, UBAP, SPG80	Ubiquitin-associated protein 1	3
NP_001165074.1	9581	PREPL	609557	PREPL, KIAA0436, CMS22	Prolyl endopeptidase-like	3
NP_001165131.1	1727	CYB5R3	613213	CYB5R3, DIA1, B5R	Cytochrome b5 reductase 3	3
NP_001165948.1	50484	RRM2B	604712	RRM2B, P53R2, PEOA5, MTDPS8A, MTDPS8B	Ribonucleotide reductase M2 B, TP53 inducible	3
NP_001165988.1	23314	SATB2	608148	SATB2, KIAA1034, GLSS	Special AT-rich sequence-binding protein 2	3
NP_001166031.1	6755	SSTR5	182455	SSTR5	Somatostatin receptor-5	3
NP_001166038.1	4615	MYD88	602170	MYD88, MYD88D	Myeloid differentiation primary response gene 88	3
NP_001166167.1	10102	TSFM	604723	TSFM, COXPD3	Ts translation elongation factor, mitochondrial	3
NP_001166216.1	10483	SEC23B	610512	SEC23B, CDAN2, HEMPAS, CWS7	SEC23 homolog B, coat complex II component	3
NP_001166289.1	5236	PGM1	171900	PGM1, GSD14, CDG1T	Phosphoglucomutase-1	3
NP_001166925.1	5160	PDHA1	300502	PDHA1, PHE1A, PDHAD	Pyruvate dehydrogenase, E1-alpha polypeptide-1	3
NP_001166938.1	121340	SP7	606633	SP7, OSX, OI12	Transcription factor Sp7	3
NP_001167462.1	51259	TMEM216	613277	TMEM216, JBTS2, CORS2, MKS2	Transmembrane protein 216	3
NP_001167567.1	6935	ZEB1	189909	ZEB1, TCF8, NIL2A, PPCD3, FECD6	Zinc finger E box-binding homeobox 1	3
NP_001167617.1	4010	LMX1B	602575	LMX1B, NPS1	LIM homeo box transcription factor 1, beta	3
NP_001167621.1	200894	ARL13B	608922	ARL13B, ARL2L1, JBTS8	ADP-ribosylation factor-like 13B	3
NP_001170858.1	6314	ATXN7	607640	ATXN7, SCA7, OPCA3	Ataxin 7	3
NP_001171113.1	1605	DAG1	128239	DAG1, DAG, MDDGC9, MDDGA9, LGMDR16	Dystrophin-associated glycoprotein-1	3
NP_001171481.1	8318	CDC45	603465	CDC45L, CDC45L2, MGORS7	Cell division cycle 45, S. Cerevisiae, homolog-like	3
NP_001171485.1	5096	PCCB	232050	PCCB	Propionyl Coenzyme A carboxylase, beta polypeptide	3
NP_001171491.1	146227	BEAN1	612051	BEAN, SCA31	Brain-expressed, associated with NEDD4	3
NP_001171536.1	846	CASR	601199	CASR, HHC1, PCAR1, FIH, EIG8, HYPOC1	Calcium-sensing receptor	3
NP_001171569.1	930	CD19	107265	CD19, CVID3	CD19 antigen	3
NP_001171605.1	6387	CXCL12	600835	CXCL12, SDF1	Chemokine, C-X-C motif, ligand 12 (stromal cell-derived factor 1)	3
NP_001171634.2	3033	HADH	601609	HADHSC, SCHAD, HHF4	L-3-hydroxyacyl-CoA dehydrogenase, short chain	3
NP_001171809.1	57526	PCDH19	300460	PCDH19, KIAA1313, EFMR, EIEE9	Protocadherin 19	3
NP_001172027.1	3630	INS	176730	INS, MODY10, IDDM2	Insulin	3
NP_001173.2	501	ALDH7A1	107323	ALDH7A1, ATQ1, EPD, PDE	Aldehyde dehydrogenase 7 family, member A1 (antiquitin 1)	3
NP_001174.2	537	ATP6AP1	300197	ATP6AP1, ATP6IP1, ATP6S1, VATPS1	ATPase, H+ transporting, lysosomal, accessory protein 1	3
NP_001177397.1	2668	GDNF	600837	GDNF, HSCR3	Glial cell line derived neurotrophic factor	3
NP_001177716.1	345643	MCIDAS	614086	MCIDAS, IDAS, CILD42	IDAS	3
NP_001177740.1	1618	DAZL	601486	DAZL, DAZH, SPGYLA	Deleted in azoospermia-like	3
NP_001177747.1	4998	ORC1	601902	ORC1, ORC1L	Origin recognition complex, subunit 1	3
NP_001177768.1	4256	MGP	154870	MGP	Matrix Gla protein	3
NP_001177848.1	7067	THRA	190120	THRA, ERBA1, THRA1, CHNG6	Thyroid hormone receptor, alpha (oncogene ERBA1)	3
NP_001180.1	579	NKX3-2	602183	NKX3-2, BAPX1, SMMD	Bagpipe homeo box, Drosophila, homolog of	3
NP_001180236.1	54809	SAMD9	610456	SAMD9, NFTC, MIRAGE	Sterile alpha motif domain-containing protein 9	3
NP_001180246.1	63894	VIPAS39	613401	VIPAS39, VIPAR, SPE39, C14orf133	VPS33B-interacting protein, apical-basolateral polarity regulator, spe-39 homolog	3
NP_001180286.1	23636	NUP62	605815	NUP62, SNDI, IBSN	Nucleoporin, 62-kD	3
NP_001180303.1	56729	RETN	605565	RETN, RSTN, FIZZ3	Resistin	3
NP_001180304.1	126328	NDUFA11	612638	NDUFA11, MC1DN14	NADH-ubiquinone oxidoreductase subunit A11	3
NP_001180395.1	284058	KANSL1	612452	KANSL1, KIAA1267, MSL1V1, KDVS	KAT8 regulatory NSL complex subunit 1	3
NP_001181876.1	1981	EIF4G1	600495	EIF4G1, EIF4G, PARK18	Eukaryotic translation initiation factor 4 gamma, 1	3
NP_001181884.1	9782	MATR3	164015	MATR3, MPD2, ALS21	Matrin 3	3
NP_001181927.1	22995	CEP152	613529	CEP152, KIAA0912, MCPH9, SCKL5	Centrosomal protein, 152kD	3
NP_001182058.1	646960	PRSS56	613858	PRSS56, MCOP6	Protease, serine, 56	3
NP_001182192.1	79955	PDZD7	612971	PDZD7, DFNB57	PDZ domain-containing 7	3
NP_001182233.1	92482	BBIP1	613605	BBIP1, NCRNA00081, BBIP10, BBS18	BBSome interacting protein 1	3
NP_001182539.1	51473	DCDC2	605755	DCDC2, RU2, KIAA1154, NPHP19, DFNB66, NSC	Doublecortin domain-containing protein 2	3
NP_001182723.1	7401	CLRN1	606397	CLRN1, USH3A, USH3, RP61	Clarin 1	3
NP_001185461.1	55074	OXR1	605609	OXR1, CHEGDD	Oxidation resistance 1	3
NP_001185728.1	51008	ASCC1	614215	ASCC1, p50, SMABF2	Activating signal cointegrator 1 complex, subunit 1	3
NP_001185767.1	10137	RBM12	607179	RBM12, KIAA0765, SCZD19	RNA-binding motif protein 12	3
NP_001185798.1	823	CAPN1	114220	CAPN1, SPG76	Calpain, large polypeptide L1	3
NP_001185832.1	55249	YY1AP1	607860	YY1AP1, YAP, HCCA2, GRNG	YY1 associated protein 1	3
NP_001185971.1	64220	STRA6	610745	STRA6, MCOPS9, MCOPCB8	Stimulated by retinoic acid 6, mouse, homolog of	3
NP_001186.1	631	BFSP1	603307	BFSP1, CP115, CTRCT33	Beaded filament structural protein-1 (filensin)	3
NP_001186036.1	57465	TBC1D24	613577	TBC1D24, KIAA1171, FIME, EIEE16, DOORS, DFNB86, DFNA65, EPRPDC	TBC1 domain family, member 24	3
NP_001186067.1	58484	NLRC4	606831	NLRC4, CARD12, CLAN, IPAF, AIFEC, FCAS4	NLR family, caspase recruitment domain-containing 4	3
NP_001186127.1	55773	TBC1D23	617687	TBC1D23, PCH11	TBC1 domain family, member 23	3
NP_001186170.1	8942	KYNU	605197	KYNU, KYNUU, VCRL2	Kynureninase	3
NP_001186220.1	3295	HSD17B4	601860	HSD17B4, PRLTS1	Hydroxysteroid (17-beta) dehydrogenase 4	3
NP_001186326.1	4750	NEK1	604588	NEK1, SRTD6, SRPS2A, ALS24	Never in mitosis gene A-related kinase 1	3
NP_001186492.1	11149	BVES	604577	BVES, HBVES, POPDC1, LGMDR25	Blood vessel epicardial substance	3
NP_001186552.1	63924	CIDEC	612120	CIDEC, FSP27, CIDE3, FPLD5	Cell death-inducing DFFA-like effector C	3
NP_001186728.1	286676	ILDR1	609739	ILDR1, DFNB42	Immunoglobulin-like domain-containing receptor 1	3
NP_001186883.1	71	ACTG1	102560	ACTG1, DFNA20, DFNA26, BRWS2	Actin, gamma-1	3
NP_001186913.1	4719	NDUFS1	157655	NDUFS1, MC1DN5	NADH-ubiquinone oxidoreductase core subunit S1	3
NP_001188326.1	1910	EDNRB	131244	EDNRB, HSCR2, ABCDS, WS4A	Endothelin receptor type B	3
NP_001188472.1	84140	FAM161A	613596	FAM161A, RP28	Family with sequence similarity 161, member A	3
NP_001189364.1	6323	SCN1A	182389	SCN1A, GEFSP2, SMEI, FEB3A, EIEE6, FHM3	Sodium channel, voltage-gated, type I, alpha polypeptide	3
NP_001189787.1	1893	ECM1	602201	ECM1, URBWD	Extracellular matrix protein-1	3
NP_001190174.1	6204	RPS10	603632	RPS10, DBA9	Ribosomal protein S10	3
NP_001191.1	650	BMP2	112261	BMP2, BMP2A, BDA2, SSFSC	Bone morphogenetic protein-2	3
NP_001191016.1	3782	KCNN3	602983	KCNN3, SK3, SKCA3, ZLS3	Potassium channel, calcium-activated, intermediate/small conductance, subfamily N, member 3	3
NP_001191215.1	4582	MUC1	158340	MUC1, PUM, MCKD1	Mucin 1, cell surface associated	3
NP_001191335.1	241	ALOX5AP	603700	ALOX5AP, FLAP	Arachidonate 5-lipoxygenase-activating protein	3
NP_001191455.1	6748	SSR4	300090	SSR4, TRAPD, CDG1Y	Signal sequence receptor, delta	3
NP_001191676.1	5981	RFC1	102579	RFC1, RECC1, CANVAS	Replication factor C1, 145kD (activator 1, 145kD)	3
NP_001191732.1	196527	ANO6	608663	ANO6, TMEM16F, SCTS, BDPLT7	Anoctamin 6	3
NP_001192183.1	100506658	OCLN	602876	OCLN, BLCPMG, PTORCH1	Occludin	3
NP_001193355.1	84833	ATP5MD	615204	ATP5MD, USMG5, DAPIT, MC5DN6	ATP synthase membrane subunit DAPIT	3
NP_001193570.2	388753	COA6	614772	COA6, C1orf31, CEMCOX4	Cytochrome c oxidase assembly factor 6	3
NP_001193910.1	152816	ODAPH	614829	ODAPH, C4orf26	Odontogenesis-associated phosphoprotein	3
NP_001193922.1	9971	NR1H4	603826	NR1H4, FXR, RIP14, PFIC5	Nuclear receptor subfamily 1 group H member 4	3
NP_001193943.1	871	SERPINH1	600943	SERPINH1, SERPINH2, PPROM, CBP2, CBP1, OI10	Serpin peptidase inhibitor, clade H, member 1	3
NP_001195.2	659	BMPR2	600799	BMPR2, PPH1, POVD1	Bone morphogenetic receptor, type II	3
NP_001202.4	701	BUB1B	602860	BUB1B, BUBR1, MVA1	BUB1 mitotic checkpoint serine/threonine kinase B	3
NP_001203.1	708	C1QBP	601269	C1QBP, HABP1, COXPD33	Complement component C1q binding protein (hyaluronic acid-binding protein 1)	3
NP_001209.1	771	CA12	603263	CA12	Carbonic anhydrase XII	3
NP_001222.3	844	CASQ1	114250	CASQ1, VMCQA	Calsequestrin, fast-twitch, skeletal muscle-1	3
NP_001223.2	845	CASQ2	114251	CASQ2	Calsequestrin, fast-twitch, skeletal muscle-2	3
NP_001225.1	859	CAV3	601253	CAV3, LQT9, MPDT, RMD2	Caveolin-3	3
NP_001229328.1	2690	GHR	600946	GHR, GHIP	Growth hormone receptor	3
NP_001229735.2	676	BRDT	602144	BRDT, SPGF21	Bromodomain, testis-specific	3
NP_001229757.1	60481	ELOVL5	611805	ELOVL5, HELO1, SCA38	Elongation of very long chain fatty acids-like 5	3
NP_001229804.1	55250	ELP2	616054	ELP2, STATIP1, MRT58	Elongator acetyltransferase complex, subunit 2	3
NP_001229971.1	3107	HLA-C	142840	HLA-C, PSORS1	Major histocompatibility complex, class I, C	3
NP_001230022.1	2533	FYB1	602731	FYB1, SLAP130, ADAP, THC3	FYN-binding protein 1	3
NP_001230106.1	226	ALDOA	103850	ALDOA, GSD12	Aldolase A, fructose-bisphosphatase	3
NP_001230155.2	6925	TCF4	602272	TCF4, SEF2, ITF2, PTHS, FECD3	Transcription factor-4 (immunoglobulin transcription factor-2)	3
NP_001230175.1	64175	P3H1	610339	P3H1, LEPRE1, GROS1, OI8	Prolyl 3-hydroxylase 1	3
NP_001230402.1	27077	B9D1	614144	B9D1, MKSR1, MKS9, JBTS27	B9 domain-containing protein 1	3
NP_001230526.1	50937	CDON	608707	CDON, CDO, HPE11	Cell adhesion molecule-related/downregulated by oncogenes	3
NP_001230672.1	2176	FANCC	613899	FANCC, FACC	Fanconi anemia, complementation group C	3
NP_001230715.1	5897	RAG2	179616	RAG2	Recombination activating gene-2	3
NP_001230855.1	7867	MAPKAPK3	602130	MAPKAP3, 3PK, MDPT3	Mitogen-activated protein kinase-activated protein kinase-3	3
NP_001230890.1	3119	HLA-DQB1	604305	HLA-DQB1, CELIAC1	Major histocompatibility complex, class II, DQ beta-1	3
NP_001230937.1	547	KIF1A	601255	KIF1A, ATSV, UNC104, SPG30, HSN2C, MRD9	Kinesin family member 1A	3
NP_001231063.1	1326	MAP3K8	191195	MAP3K8, COT, EST, TPL2	Mitogen-activated protein kinase kinase kinase 8 (cancer Osaka thyroid oncogene)	3
NP_001231118.1	9786	KIAA0586	610178	KIAA0586, TALPID3, JBTS23, SRTD14	KIAA0586 gene	3
NP_001231367.1	383	ARG1	608313	ARG1	Arginase, liver	3
NP_001231509.1	8295	TRRAP	603015	TRRAP, DEDDFA	Transformation/transcription domain-associated protein	3
NP_001231682.1	2215	FCGR3B	610665	FCGR3B	Fc fragment of IgG, low affinity IIIb, receptor for	3
NP_001231739.1	27086	FOXP1	605515	FOXP1, QRF1	Forkhead box P1	3
NP_001238920.1	51053	GMNN	602842	GMNN, MGORS6	Geminin	3
NP_001238949.1	4308	TRPM1	603576	TRPM1, MLSN1, CSNB1C	Transient receptor potential cation channel, subfamily M, member 1 (melastatin)	3
NP_001240312.1	6138	RPL15	604174	RPL15, DBA12	Ribosomal protein L15	3
NP_001240752.1	644	BLVRA	109750	BLVRA	Biliverdin reductase A	3
NP_001241681.1	7381	UQCRB	191330	UQCRB, UQBP, QPC, MC3DN3	Ubiquinol-cytochrome c reductase binding protein	3
NP_001242914.1	78989	COLEC11	612502	COLEC11, CLK1, 3MC2	Collectin 11	3
NP_001243143.1	478	ATP1A3	182350	ATP1A3, DYT12, RDP, AHC2, CAPOS	ATPase, Na+K+ transporting, alpha-3 polypeptide	3
NP_001243211.1	3856	KRT8	148060	KRT8	Keratin 8	3
NP_001243339.1	22931	RAB18	602207	RAB18, WARBM3	Ras-associated protein RAB18	3
NP_001243371.1	112476	PRRT2	614386	PRRT2, PKC, DYT10, EKD1, BFIS2, BFIC2, ICCA	Proline-rich transmembrane protein 2	3
NP_001243463.1	6576	SLC25A1	190315	SLC25A1, SLC20A3, CTP, D2L2AD, CMS23	Solute carrier family 25 (mitochondrial citrate transporter), member 1	3
NP_001243506.2	6134	RPL10	312173	RPL10, DXS648, QM, AUTSX5, MRXS35	Ribosomal protein L10	3
NP_001243546.1	10844	TUBGCP2	617817	TUBGCP2, GCP2, GRIP103, SPC97, ALP4, PAMDDFS	Tubulin-gamma complex-associated protein 2	3
NP_001243643.1	352909	DNAAF3	614566	DNAAF3, PF22, DAB1, CILD2	Dynein, axonemal, assembly factor 3	3
NP_001243722.1	658	BMPR1B	603248	BMPR1B, ALK6, AMDD, BDA2, BDA1D	Bone morphogenetic protein receptor, type IB	3
NP_001243750.1	6016	RIT1	609591	RIT1, RIT, ROC1, NS8	Ric-like protein without CAAX motif 1	3
NP_001243793.1	9829	DNAJC6	608375	DNAJC6, DJC6, KIAA0473, PARK19	DNAJ heat shock protein family (Hsp40) member C6	3
NP_001244066.1	83737	ITCH	606409	ITCH, AIP4, NAPP1, ADMFD	Itchy, mouse, homolog of	3
NP_001244127.1	8452	CUL3	603136	CUL3, PHA2E	Cullin 3	3
NP_001244289.1	271	AMPD2	102771	AMPD2, SPG63, PCH9	Adenosine monophosphate deaminase-2, isoform L	3
NP_001244918.1	1890	TYMP	131222	TYMP, ECGF1, MNGIE, PDECGF, MEDPS1, MTDPS1	Thymidine phosphorylase	3
NP_001244941.2	2232	FDXR	103270	FDXR, ADXR, ANOA	Ferredoxin reductase (adrenodoxin reductase)	3
NP_001245134.1	162514	TRPV3	607066	TRPV3, OLMS, FNEPPK2	Transient receptor potential cation channel, subfamily V, member 3	3
NP_001245218.1	8991	SELENBP1	604188	SELENBP1, SP56, EHMTO	Selenium-binding protein 1	3
NP_001245282.1	9343	EFTUD2	603892	EFTUD2, KIAA0031, MFDGA	Elongation factor Tu GTP-binding domain-containing 2	3
NP_001245300.2	89	ACTN3	102574	ACTN3, ACTN3D	Actinin, alpha-3	3
NP_001245325.1	388389	CCDC103	614677	CCDC103, SMH, PR46B, CILD17	Coiled-coil domain-containing protein 103	3
NP_001245367.1	6897	TARS	187790	TARS1, TARS, TTD7	Threonyl-tRNA synthetase 1	3
NP_001245391.1	5080	PAX6	607108	PAX6, AN2, MGDA, FVH1, ASGD5	Paired box homeotic gene-6	3
NP_001247421.1	5962	RDX	179410	RDX, DFNB24	Radixin	3
NP_001248357.1	23175	LPIN1	605518	LPIN1	Lipin 1	3
NP_001248755.1	8943	AP3D1	607246	AP3D1, HPS10	Adaptor-related protein complex 3, delta-1 subunit	3
NP_001251.1	1024	CDK8	603184	CDK8, IDDHBA	Cyclin-dependent kinase 8	3
NP_001252516.1	3640	INSL3	146738	INSL3	Insulin-like 3, Leydig cell	3
NP_001252521.1	57449	PLEKHG5	611101	PLEKHG5, KIAA0720, DSMA4, CMTRIC	Pleckstrin homology domain- and RhoGEF domain-containing protein G5	3
NP_001254479.2	7273	TTN	188840	TTN, CMD1G, TMD, LGMDR10, MPRM, HMERF, SALMY	Titin	3
NP_001254751.1	84225	ZMYND15	614312	ZMYND15, SPGF14	Zinc finger MYND-containing protein 15	3
NP_001255.3	1041	CDSN	602593	CDSN, HTSS1, HYPT2, PSS1	Corneodesmosin	3
NP_001257376.1	37	ACADVL	609575	ACADVL, VLCAD	Acyl-Coenzyme A dehydrogenase, very long chain	3
NP_001257437.1	7128	TNFAIP3	191163	TNFAIP3, A20, OTUD7C, AISBL	Tumor necrosis factor-alpha-induced protein 3	3
NP_001258137.1	4703	NEB	161650	NEB, NEM2	Nebulin	3
NP_001258370.1	755	C21orf2	603191	CFAP410, C21orf2, SMDAX, RDMS	Cilia and flagella-associated protein 410	3
NP_001258614.1	23443	SLC35A3	605632	SLC35A3, AMRS	Solute carrier family 35 (UDP-GlcNAc transporter), member 3	3
NP_001258732.1	51308	REEP2	609347	REEP2, C5orf19, SPG72	Receptor expression-enhancing protein 2	3
NP_001258767.1	51319	RSRC1	613352	RSRC1, SRRP53, MRT70	Arginine/serine-rich coiled-coil protein 1	3
NP_001258867.1	1954	MEGF8	604267	MEGF8, EGFL4, CRPT2	Multiple epidermal growth factor-like domains 8	3
NP_001258963.1	6813	STXBP2	601717	STXBP2, UNC18B, FHL5	Syntaxin binding protein 2	3
NP_001262.3	1106	CHD2	602119	CHD2, EEOC	Chromodomain helicase DNA binding protein-2	3
NP_001263274.1	7139	TNNT2	191045	TNNT2, CMH2, CMD1D, RCM3, LVNC6	Troponin-T2, cardiac	3
NP_001263990.1	56947	MFF	614785	MFF, C2orf33, EMPF2	Mitochondrial fission factor	3
NP_001264044.1	8701	DNAH11	603339	DNAH11, DNAHC11, CILD7, DNAHBL	Dynein, axonemal, heavy chain-11	3
NP_001264055.1	91662	NLRP12	609648	NLRP12, NALP12, PYPAF7, RNO, FCAS2	NLR family, pyrin domain containing 12	3
NP_001264198.1	340990	OTOG	604487	OTOG, OTGN, DFNB18B	Otogelin	3
NP_001264890.1	6786	STIM1	605921	STIM1, TAM1, IMD10, STRMK	Stromal interaction molecule 1	3
NP_001264900.1	84197	POMK	615247	POMK, SGK196, MDDGA12, MDDGC12	Protein-O-mannose kinase	3
NP_001265003.1	1289	COL5A1	120215	COL5A1, EDSCL1	Collagen V, alpha-1 polypeptide	3
NP_001265045.1	3897	L1CAM	308840	L1CAM, CAML1, HSAS1, MASA, SPG1	L1 cell adhesion molecule	3
NP_001265290.1	399	RHOH	602037	RHOH, ARHH, TTF	Ras homolog gene family, member H	3
NP_001265393.1	10059	DNM1L	603850	DNM1L, DRP1, DVLP, DYMPLE, EMPF1, OPA5	Dynamin 1-like	3
NP_001265441.1	8120	AP3B2	602166	AP3B2, NAPTB, EIEE48	Adaptor-related protein complex 3, beta 2 subunit	3
NP_001265595.1	51715	RAB23	606144	RAB23	Ras-associated protein RAB23	3
NP_001265620.1	6756	SSX1	312820	SSX1, SSRC	Synovial sarcoma, X breakpoint 1	3
NP_001265665.1	6352	CCL5	187011	CCL5, SCYA5, D17S136E, TCP228	Chemokine, C-C motif, ligand 5	3
NP_001265868.1	2006	ELN	130160	ELN, SVAS, ADCL1	Elastin	3
NP_001267.2	1116	CHI3L1	601525	CHI3L1, GP39, YKL40, ASRT7	Chitinase 3-like 1 (cartilage glycoprotein-39)	3
NP_001268231.1	84340	GFM2	606544	GFM2, EFG2, RRF	Mitochondrial elongation factor G2	3
NP_001268232.1	10558	SPTLC1	605712	SPTLC1, LBC1, SPT1, HSN1, HSAN	Serine palmitoyltransferase, long-chain base subunit 1	3
NP_001268357.1	27019	DNAI1	604366	DNAI1, CILD1, ICS, PCD	Dynein, axonemal, intermediate chain 1	3
NP_001268400.1	23262	PPIP5K2	611648	PPIP5K2, HISPPD1, VIP2, KIAA0433, DFNB100	Histidine acid phosphatase domain-containing protein 1	3
NP_001268425.1	5245	PHB	176705	PHB	Prohibitin	3
NP_001268432.1	114798	SLITRK1	609678	SLITRK1, KIAA1910, TTM	SLIT- and NTRK-like family, member 1	3
NP_001268652.1	686	BTD	609019	BTD	Biotinidase	3
NP_001268862.1	54892	NCAPG2	608532	NCAPG2, CAPG2, MTB, 3KS	Non-SMC condensin II complex subunit G2	3
NP_001269154.1	51816	ADA2	607575	ADA2, CECR1, VAIHS, SNEDS	Adenosine deaminase 2	3
NP_001269210.1	5831	PYCR1	179035	PYCR1, PRO3, ARCL2B, ARCL3B	Pyrroline-5-carboxylate reductase-1	3
NP_001269262.1	79042	TSEN34	608754	TSEN34, PCH2C, LENG5, SEN34	tRNA splicing endonuclease, subunit 34	3
NP_001269516.1	9563	H6PD	138090	H6PD, GDH, G6PDH, CORTRD1	Hexose-6-phosphate dehydrogenase	3
NP_001269580.1	7355	SLC35A2	314375	SLC35A2, UGALT, UGTL, UGT2, CDGX, CDG2M	Solute carrier family 35 (UDP-galactose transporter), member 2	3
NP_001269800.1	6007	RHD	111680	RHD	Rhesus system D polypeptide	3
NP_001269862.1	84905	ZNF341	618269	ZNF341, HIES3	Zinc finger protein 341	3
NP_001269938.1	51750	RTEL1	608833	RTEL1, C20orf41, NHL, KIAA1088, DKCB5, DKCA4, PFBMFT3	Regulator of telomere elongation helicase 1	3
NP_001272972.1	34	ACADM	607008	ACADM, MCAD	Acyl-Coenzyme A dehydrogenase, C-4 to C-12 straight chain	3
NP_001273035.1	9474	ATG5	604261	ATG5, APG5, APG5L, ASP, SCAR25	Autophagy related 5	3
NP_001273343.1	27229	TUBGCP4	609610	TUBGCP4, GCP4, MCCRP3	Tubulin-gamma complex-associated protein 4	3
NP_001273540.1	85021	REPS1	614825	REPS1, NBIA7	RALBP1-associated EPS domain-containing protein 1	3
NP_001273633.1	51569	UFM1	610553	UFM1, HLD14	Ubiquitin-fold modifier 1	3
NP_001273644.1	23287	AGTPBP1	606830	AGTPBP1, NNA1, KIAA1035, CCP1, CONDCA	ATP/GTP-binding protein 1	3
NP_001274.1	1174	AP1S1	603531	AP1S1, CLAPS1, AP19, MEDNIK	Adaptor-related protein complex 1, sigma 1 subunit	3
NP_001274273.1	695	BTK	300300	BTK, AGMX1, IMD1, XLA, AT, IGHD3	Bruton agammaglobulinemia tyrosine kinase	3
NP_001274353.1	1050	CEBPA	116897	CEBPA, CEBP	CCAAT/enhancer-binding protein (C/EBP), alpha	3
NP_001274418.1	9381	OTOF	603681	OTOF, DFNB9, NSRD9, AUNB1	Otoferlin	3
NP_001274428.1	23288	IQCE	617631	IQCE, KIAA1023, PAPA7	IQ domain-containing protein E	3
NP_001274679.1	2222	FDFT1	184420	FDFT1, DGPT, SQSD	Farnesyl-diphosphate farnesyltransferase 1 (squalene synthase)	3
NP_001274730.1	6905	TBCE	604934	TBCE, KCS, KCS1, HRD, PEAMO	Tubulin-specific chaperone E	3
NP_001275512.1	388588	SMIM1	615242	SMIM1, VEL	Small integral membrane protein 1	3
NP_001275655.1	26610	ELP4	606985	ELP4, PAX6NEB, AN2	Elongation protein 4, S. cerevisiae, homolog of	3
NP_001275693.1	1760	DMPK	605377	DMPK, DM, DMK	Dystrophia myotonica-protein kinase	3
NP_001275696.1	79798	ARMC5	615549	ARMC5, AIMAH2	Armadillo repeat-containing protein 5	3
NP_001275710.1	123016	TTC8	608132	TTC8, BBS8, RP51	Tetratricopeptide repeat domain 8	3
NP_001275880.1	57217	TTC7A	609332	TTC7A, TTC7, KIAA1140, MINAT, GIDID	Tetratricopeptide repeat domain 7A	3
NP_001275929.1	164656	TMPRSS6	609862	TMPRSS6, IRIDA	Transmembrane protease, serine 6 (matriptase 2)	3
NP_001275996.1	3070	HELLS	603946	HELLS, LSH, ICF4	Helicase, lymphoid-specific	3
NP_001276033.1	5589	PRKCSH	177060	PRKCSH, G19P1, PCLD1	Protein kinase C substrate 80K-H	3
NP_001276052.1	10382	TUBB4A	602662	TUBB4A, DYT4, HLD6	Tubulin, beta-4A	3
NP_001276054.1	3455	IFNAR2	602376	IFNAR2, IMD45	Interferon, alpha, beta, and omega, receptor 2	3
NP_001276325.1	6595	SMARCA2	600014	SMARCA2, SNF2L2, NCBRS	SWI/SNF related, matrix associated, actin dependent regulator of chromatin, subfamily a, member 2	3
NP_001276718.1	2821	GPI	172400	GPI	Glucose phosphate isomerase; neuroleukin	3
NP_001276736.1	1410	CRYAB	123590	CRYAB, CRYA2, CTPP2, CMD1II, CTRCT16, MFM2	Crystallin, alpha B	3
NP_001276932.1	7066	THPO	600044	THPO, MGDF, MPLLG, TPO, THCYT1	Thrombopoietin (megakaryocyte growth and development factor)	3
NP_001277145.1	5915	RARB	180220	RARB, HAP, MCOPS12	Retinoic acid receptor, beta polypeptide	3
NP_001277738.1	1814	DRD3	126451	DRD3, ETM1, FET1	Dopamine receptor D3	3
NP_001278.1	1186	CLCN7	602727	CLCN7, CLC7, OPTA2, OPTB4, HOD	Chloride channel-7	3
NP_001278159.1	2099	ESR1	133430	ESR1, ESR, ESTRR	Estrogen receptor 1	3
NP_001278232.1	79633	FAT4	612411	FAT4, VMLDS2, HKLLS2	FAT atypical cadherin 4	3
NP_001278357.1	581	BAX	600040	BAX	BCL2-associated X protein	3
NP_001278651.1	26999	CYFIP2	606323	CYFIP2, EIEE65	Cytoplasmic FMRP interacting protein 2	3
NP_001278796.1	4810	NHS	300457	NHS, CXN, CTRCT40	NHS gene	3
NP_001278798.1	10644	IGF2BP2	608289	IGF2BP2, IMP2	Insulin-like growth factor 2 mRNA-binding protein 2	3
NP_001278938.1	346007	EYS	612424	EYS, RP25	Eyes shut, Drosophila, homolog of	3
NP_001280.3	1193	CLIC2	300138	CLIC2, XAP121, MRXS32	Chloride intracellular channel 2	3
NP_001280014.1	669	BPGM	613896	BPGM, ECYT8	2,3-bisphosphoglycerate mutase	3
NP_001280141.1	203068	TUBB	191130	TUBB, TUBB5, M40, CDCBM6, CSCSC1	Tubulin, beta polypeptide	3
NP_001280569.1	23325	WASHC4	615748	WASHC4, KIAA1033, SWIP, MRT43	WASH complex, subunit 4	3
NP_001280654.1	6875	TAF4B	601689	TAF4B, TAF2C2, TAFII105, SPGF13	TAF4b RNA polymerase II, TATA box-binding protein-associated factor, 105kD	3
NP_001284707.1	64802	NMNAT1	608700	NMNAT1, NMNAT, PNAT1, LCA9	Nicotinamide nucleotide adenylyltransferase 1	3
NP_001287690.1	83894	TTC29	618735	TTC29, SPGF42	Tetratricopeptide repeat domain-containing protein 29	3
NP_001287714.1	4547	MTTP	157147	MTTP	Microsomal triglyceride transfer protein, 88kD	3
NP_001287771.1	84068	SLC10A7	611459	SLC10A7, SSASKS	Solute carrier family 10 (sodium/bile acid cotransporter family), member 7	3
NP_001287831.1	1604	CD55	125240	CD55, DAF, CROM, CHAPLE	CD55 antigen (blood group Cromer)	3
NP_001287864.1	387129	NPSR1	608595	NPSR1, GPR154, GPRA, VRR1, PGR14, ASRT2	Neuropeptide S receptor 1	3
NP_001287939.1	91801	ALKBH8	613306	ALKBH8, ABH8, MRT71	AlkB homolog 8, tRNA methyltransferase	3
NP_001287940.1	79140	CCDC28B	610162	CCDC28B, MGC1203	Coiled-coil domain-containing protein 28B	3
NP_001288.3	1258	CNGB1	600724	CNGB1, CNCG3L, CNCG2, RP45	Cyclic nucleotide gated channel, beta 1	3
NP_001288160.1	3149	HMGB3	300193	HMGB3, HMG4, HMG2A, MCOPS13	High-mobility group box 3 (high mobility group protein 4)	3
NP_001288171.1	396	ARHGDIA	601925	ARHGDIA, GDIA1, NPHS8	Rho GDP dissociation inhibitor (GDI) alpha	3
NP_001288268.1	400916	CHCHD10	615903	CHCHD10, FTDALS2, SMAJ, IMMD	Coiled-coil-helix-coiled-coil-helix domain-containing protein 10	3
NP_001288675.1	26022	TMEM98	615949	TMEM98, NNO4	Transmembrane protein 98	3
NP_001289617.1	348	APOE	107741	APOE, AD2, LPG, LDLCQ5	Apolipoprotein E	3
NP_001289753.1	51738	GHRL	605353	GHRL	Ghrelin	3
NP_001290343.1	5645	PRSS2	601564	PRSS2, TRY2	Protease, serine, 2 (trypsin 2)	3
NP_001290453.1	84617	TUBB6	615103	TUBB6, FPVEPD	Tubulin, beta-6	3
NP_001291.3	1316	KLF6	602053	KLF6, COPEB, BCD1, ZF9	Kruppel-like factor-6	3
NP_001291217.1	3921	RPSA	150370	RPSA, LAMR1, LAMBR, ICAS	Ribosomal protein SA	3
NP_001291278.1	5566	PRKACA	601639	PRKACA	Protein kinase, cAMP-dependent, catalytic, alpha	3
NP_001291347.1	56203	LMOD3	616112	LMOD3, NEM10	Leiomodin 3	3
NP_001291367.1	124842	TMEM132E	616178	TMEM132E, DFNB99	Transmembrane protein 132E	3
NP_001291490.1	56244	BTNL2	606000	BTNL2, SS2	Butyrophilin-like protein 2	3
NP_001291646.2	5728	PTEN	601728	PTEN, MMAC1, GLM2, CWS1	Phosphatase and tensin homolog (mutated in multiple advanced cancers 1)	3
NP_001291740.1	57102	C12orf4	616082	C12orf4	Chromosome 12 open reading frame 4	3
NP_001291744.1	23152	CIC	612082	CIC, KIAA0306, MRD45	Capicua transcriptional repressor	3
NP_001291934.1	60482	SLC5A7	608761	SLC5A7, CHT1, HMN7A, CMS20	Solute carrier family 5 (choline transporter), member 7	3
NP_001291937.1	80856	LNPK	610236	LNPK, KIAA1715, NEDEHCC	Lunapark	3
NP_001292204.1	375790	AGRN	103320	AGRN, CMS8	Agrin	3
NP_001292353.1	56776	FMN2	606373	FMN2, MRT47	Formin 2	3
NP_001292510.1	83938	LRMDA	614537	LRMDA, C10orf11, OCA7	Leucine-rich melanocyte differentiation-associated protein	3
NP_001292553.1	805	CALM2	114182	CALM2, LQT15	Calmodulin-2	3
NP_001293139.1	7046	TGFBR1	190181	TGFBR1, ALK5, AAT5, LDS1, MSSE	Transforming growth factor, beta receptor I (activin A receptor type II-like kinase, 53kD)	3
NP_001294.2	1352	COX10	602125	COX10	Cytochrome c oxidase, subunit X	3
NP_001294869.1	79983	POF1B	300603	FLJ22792, POF1B, POF2B	FLJ22792 gene	3
NP_001294936.1	8726	EED	605984	EED, WAIT1, COGIS	Embryonic ectoderm development protein	3
NP_001295022.1	2626	GATA4	600576	GATA4, ASD2, VSD1, TACHD, TOF	GATA-binding protein-4	3
NP_001295051.1	6584	SLC22A5	603377	SLC22A5, OCTN2, CDSP, SCD	Solute carrier, family 22 (organic cation transporter), member 5	3
NP_001295093.1	85476	GFM1	606639	GFM1, EFG1, GFM, COXPD1	Mitochondrial elongation factor G1	3
NP_001295139.1	10194	TSHZ1	614427	TSHZ1, TSH1, CAA	Teashirt zinc finger homeobox 1	3
NP_001295140.1	124454	EARS2	612799	EARS2, KIAA1970, COXPD12	Glutamyl-tRNA synthetase 2	3
NP_001295561.1	5424	POLD1	174761	POLD1, CRCS10, MDPL	Polymerase (DNA directed), delta 1, catalytic subunit	3
NP_001296122.1	2048	EPHB2	600997	EPHB2, EPHT3, DRT, ERK, PCBC, CAPB, BDPLT22	eph tyrosine kinase 3 (ephrin receptor EphB2)	3
NP_001296373.1	6678	SPARC	182120	SPARC, ON, OI17	Osteonectin (secreted protein, acidic, cysteine-rich)	3
NP_001297267.1	92667	MGME1	615076	MGME1, C20orf72, MTDPS11	Mitochondrial genome maintenance exonuclease 1	3
NP_001298127.1	1173	AP2M1	601024	AP2M1, CLAPM1, MRD60	Adaptor-related protein complex 2, mu 1 subunit	3
NP_001298184.1	26258	BLOC1S6	604310	BLOC1S6, BLOS6, PLDN, PA, HPS9	Biogenesis of lysosome-related organelles complex 1, subunit 6	3
NP_001298240.1	79001	VKORC1	608547	VKORC1, VKOR, VKCFD2, FLJ00289	Vitamin K epoxide reductase complex, subunit 1	3
NP_001299.1	1369	CPN1	603103	CPN1, SCPN, CPN	Carboxypeptidase N, polypeptide 1, 50-kD	3
NP_001299801.1	116228	COX20	614698	COX20, FAM36A	Cytochrome c oxidase assembly factor COX20	3
NP_001299838.1	63901	FAM111A	615292	FAM111A, KIAA1895, KCS2, GCLEB	Family with sequence similarity 111, member A	3
NP_001300655.1	63982	ANO3	610110	ANO3, TMEM16C, C11orf25, DYT24	Anoctamin 3	3
NP_001300971.1	10765	KDM5B	605393	KDM5B, JARID1B, PUT1, PLU1, RBBP2H1A, MRT65	Lysine-specific demethylase 5B	3
NP_001301006.1	5627	PROS1	176880	PROS1, THPH5, THPH6	Protein S, alpha	3
NP_001302420.1	4359	MPZ	159440	MPZ, CMT1B, CMTDID, DSS, CHN2	Myelin protein zero	3
NP_001302430.1	5002	SLC22A18	602631	SLC22A1L, BWSCR1A, IMPT1	Solute carrier family 22, member 1-like (Beckwith-Wiedemann region 1A; organic-cation transporter-like 2)	3
NP_001302459.1	6154	RPL26	603704	RPL26, DBA11	Ribosomal protein L26	3
NP_001303240.1	6165	RPL35A	180468	RPL35A, DBA5	Ribosomal protein L35A	3
NP_001303249.1	5351	PLOD1	153454	PLOD1, LH1, LLH, EDSKCL1	Procollagen-lysine, 2-oxoglutarate 5-dioxygenase (lysine hydroxylase)	3
NP_001303258.1	5582	PRKCG	176980	PRKCG, PKCC, PKCG, SCA14	Protein kinase C, gamma polypeptide	3
NP_001303281.1	5741	PTH	168450	PTH	Parathyroid hormone	3
NP_001303941.1	64412	GZF1	613842	GZF1, ZNF336, JLSM	GDNF-inducible zinc finger protein 1	3
NP_001303963.1	8813	DPM1	603503	DPM1, MPDS, CDGIE	Dolichyl-phosphate mannosyltransferase 1, catalytic subunit	3
NP_001303969.1	2720	GLB1	611458	GLB1, MPS4B	Galactosidase, beta-1	3
NP_001304019.1	50801	KCNK4	605720	KCNK4, TRAAK, FHEIG	Potassium channel, subfamily K, member 4	3
NP_001304092.1	727	C5	120900	C5, C5D, ECLZB	Complement component-5	3
NP_001304264.1	1675	CFD	134350	CFD, ADN	Complement factor D	3
NP_001304941.1	7518	XRCC4	194363	XRCC4, SSMED	X-ray repair, complementing defective, repair in Chinese hamster cells-4	3
NP_001304946.1	335	APOA1	107680	APOA1, HPALP2	Apolipoprotein A-I	3
NP_001304967.1	53947	A4GALT	607922	A4GALT, P1PK	Alpha 1,4-galactosyltransferase	3
NP_001304986.1	3426	CFI	217030	CFI, FI, AHUS3, ARMD13	Complement factor I	3
NP_001305051.1	203	AK1	103000	AK1	Adenylate kinase-1	3
NP_001305068.1	57591	MKL1	606078	MKL1, AMKL, MAL	Megakaryoblastic leukemia 1 gene	3
NP_001305127.1	29887	SNX10	614780	SNX10, OPTB8	Sorting nexin 10	3
NP_001305425.1	51475	CABP2	607314	CABP2, DFNB93	Calcium-binding protein 2	3
NP_001305436.1	348180	CTU2	617057	CTU2, C16orf84, NCS2, MFRG	Cytosolic thiouridylase, subunit 2	3
NP_001305453.1	51693	TRAPPC2L	610970	TRAPPC2L, PERRB	Trafficking protein particle complex 2-like	3
NP_001305466.1	10253	SPRY2	602466	SPRY2, IGAN3	Sprouty RTK signaling antagonist 2	3
NP_001305713.1	4952	OCRL	300535	OCRL, LOCR, OCRL1, NPHL2	Phosphatidylinositol polyphosphate 5-phosphatase (OCRL gene)	3
NP_001305754.1	3073	HEXA	606869	HEXA, TSD	Hexosaminidase A, alpha polypeptide	3
NP_001305771.1	10695	CNPY3	610774	CNPY3, TNRC5, PRAT4A, ERDA5, EIEE60	Canopy 3, zebrafish, homolog of	3
NP_001305894.1	8890	EIF2B4	606687	EIF2B4	Eukaryotic translation initiation factor 2B, subunit 4	3
NP_001305990.1	2978	GUCA1A	600364	GUCA1A, GCAP, COD3, CORD14	Guanylate cyclase activator 1A, retina	3
NP_001306003.1	84839	RAX2	610362	RAX2, RAXL1, QRX, CORD11, ARMD6	Retina and anterior neural fold homeobox 2	3
NP_001306008.1	3159	HMGA1	600701	HMGA1, HMGIY	High-mobility group AT-hook 1	3
NP_001306032.1	4978	OPCML	600632	OPCML	Opioid-binding protein/cell adhesion molecule-like	3
NP_001306036.1	9657	IQCB1	609237	IQCB1, NPHP5, KIAA0036	IQ motif-containing protein B1	3
NP_001306067.1	8200	GDF5	601146	GDF5, CDMP1, SYNS2, OS5, BDA1C, SYM1B	Growth/differentiation factor-5 (cartilage-derived morphogenetic protein-1)	3
NP_001306134.1	5443	POMC	176830	POMC, OBAIRH	Proopiomelanocortin (adrenocorticotropin/beta-lipotropin)	3
NP_001307028.1	8738	CRADD	603454	CRADD, RAIDD, MRT34	Caspase and RIP adaptor with death domain	3
NP_001307256.1	51142	CHCHD2	616244	CHCHD2, PARK22	Coiled-coil-helix-coiled-coil-helix domain-containing protein 2	3
NP_001307582.1	4927	NUP88	602552	NUP88, FADS4	Nucleoporin, 88-kD	3
NP_001307646.1	617	BCS1L	603647	BCS1L, FLNMS, GRACILE, BJS, PTD, MC3DN1	BCS1 homolog, ubiquinol-cytochrome c reductase complex chaperone	3
NP_001307680.1	412	STS	300747	STS, ARSC1, ARSC, SSDD, XLI	Steroid sulfatase, microsomal (arylsulfatase C, isozyme S)	3
NP_001307784.1	59	ACTA2	102620	ACTA2, ACTSA, AAT6, MYMY5	Actin, alpha-2, smooth muscle, aorta	3
NP_001308031.1	51112	TRAPPC12	614139	TRAPPC12, TTC15, PEBAS	Trafficking protein particle complex, subunit 12	3
NP_001308062.1	9570	GOSR2	604027	GOSR2, GS27, EPM6	Golgi snap receptor complex member 2	3
NP_001308066.1	9051	PSTPIP1	606347	PSTPIP1, PSTPIP, CD2BP1, PAPAS	Proline-serine-threonine phosphatase-interacting protein 1	3
NP_001308154.1	10013	HDAC6	300272	HDAC6, CPBHM	Histone deacetylase 6	3
NP_001308207.1	80746	TSEN2	608753	TSEN2, SEN2, PCH2B	tRNA splicing endonuclease, subunit 2	3
NP_001308307.1	5286	PIK3C2A	603601	PIK3C2A, CPK, OCSKD	Phosphatidylinositol 3-kinase, class 2, alpha	3
NP_001308658.1	23233	EXOC6B	607880	EXOC6B, SEC15B, KIAA0919, SEMDJL3	Exocyst complex component 6B	3
NP_001308690.1	84529	C15orf41	615626	C15orf41	Chromosome 15 open reading fram 41	3
NP_001308766.1	767	CA8	114815	CA8, CALS, CARP, CAMRQ3	Carbonic anhydrase VIII	3
NP_001308896.1	84896	ATAD1	614452	ATAD1, THORASE, HKPX4	ATPase family, AAA domain-containing, member 1	3
NP_001308943.1	5395	PMS2	600259	PMS2, PMSL2, HNPCC4	PMS1 homolog 2, mismatch repair system component	3
NP_001308948.1	4705	NDUFA10	603835	NDUFA10, MC1DN22	NADH-ubiquinone oxidoreductase subunit A10	3
NP_001309070.1	128989	TANGO2	616830	TANGO2, C22orf25, MECRCN	Transport and golgi organization 2 homolog	3
NP_001309294.1	3098	HK1	142600	HK1, HKD, HMSNR, RP79, NEDVIBA	Hexokinase-1	3
NP_001309774.1	79631	EFL1	617538	EFL1, RIA1, EFTUD1, FAM42A, SDS2	Elongation factor-like GTPase 1	3
NP_001309837.1	6616	SNAP25	600322	SNAP25, CMS18	Synaptosomal-associated protein, 25kD	3
NP_001309896.1	4942	OAT	613349	OAT, GACR	Ornithine aminotransferase	3
NP_001309933.1	5092	PCBD1	126090	PCBD1, DCOH	Pterin-4a-carbinolamine dehydratase 1	3
NP_001310011.1	5264	PHYH	602026	PHYH, PAHX	Phytanoyl-CoA hydroxylase	3
NP_001310442.1	84100	ARL6	608845	ARL6, BBS3, RP55	ADP-ribosylation factor-like 6	3
NP_001310446.1	5950	RBP4	180250	RBP4, RDCCAS, MCOPCB10	Retinol-binding protein-4, interstitial	3
NP_001311.3	1460	CSNK2B	115441	CSNK2B, POBINDS	Casein kinase-2, beta polypeptide	3
NP_001311265.1	8036	SHOC2	602775	SHOC2, SIAA0862, SOC2, SUR8	SHOC2 leucine-rich repeat scaffold protein	3
NP_001314.1	1474	CST6	601891	CST6, ECTD15	Cystatin-M	3
NP_001316166.1	91754	NEK9	609798	NEK9, NERCC1, LCCS10, APUG, NC	Never in mitosis gene A-related kinase 9	3
NP_001316485.1	92840	REEP6	609346	REEP6, DP1L1, TB2L1, C19orf32, RP77	Receptor expression-enhancing protein 6	3
NP_001316524.1	317719	KLHL10	608778	KLHL10, SPGF11	Kelch-like 10	3
NP_001316801.1	358	AQP1	107776	AQP1, CHIP28, CO	Aquaporin-1 (channel-forming integral protein, 28kD)	3
NP_001316806.1	2523	FUT1	211100	FUT1, H, HH	Fucosyltransferase-1 (Bombay phenotype)	3
NP_001316868.1	7043	TGFB3	190230	TGFB3, ARVD1, RNHF, LDS5	Transforming growth factor, beta-3	3
NP_001316998.1	5587	PRKD1	605435	PRKD1, PRKCM, PKD, CHDED	Protein kinase D1	3
NP_001317054.1	6844	VAMP2	185881	VAMP2, SYB2, NEDHAHM	Vesicle-associated membrane protein-2 (synaptobrevin-2)	3
NP_001317183.1	55681	SCYL2	616365	SCYL2, CVAK104, KIAA1360, AMCNACC	SCY1-like protein 2	3
NP_001317217.1	6601	SMARCC2	601734	SMARCC2, BAF170, CSS8	SW1/SNF related, matrix associated, actin dependent regulator of chromatin, subfamily c, member 2	3
NP_001317240.1	1855	DVL1	601365	DVL1, DRS2	Dishevelled segment polarity protein 1	3
NP_001317261.1	970	CD70	602840	CD70, TNFSF7, CD27L, LPFS3	CD70 molecule	3
NP_001317287.1	4524	MTHFR	607093	MTHFR	Methylenetetrahydrofolate reductase	3
NP_001317289.1	5422	POLA1	312040	POLA1, VEODS	Polymerase, DNA, alpha-1	3
NP_001317316.1	51002	TPRKB	608680	TPRKB, GAMOS5	TP53RK-binding protein	3
NP_001317366.1	5781	PTPN11	176876	PTPN11, PTP2C, SHP2, NS1, JMML, METCDS	Protein tyrosine phosphatase, nonreceptor-type, 11	3
NP_001317598.1	6301	SARS	607529	SARS1, SARS, SERS, NEDMAS	Seryl-tRNA synthetase 1	3
NP_001317692.1	3420	IDH3B	604526	IDH3B, RP46	Isocitrate dehydrogenase 3, beta subunit	3
NP_001332820.1	201973	PRIMPOL	615421	CCDC111, MYP22	Coiled-coil domain containing 111	3
NP_001333152.1	3560	IL2RB	146710	IL2RB, IMD63	Interleukin-2 receptor, beta polypeptide	3
NP_001333369.1	2074	ERCC6	609413	ERCC6, CKN2, COFS1, CSB, ARMD5, UVSS1, POF11	Excision repair cross complementing rodent repair deficiency, complementation group 6	3
NP_001333396.1	55129	ANO10	613726	ANO10, TMEM16K, SCAR10	Anoctamin 10	3
NP_001333471.1	112609	MRAP2	615410	MRAP2, C6orf117, BMIQ18	Melanocortin 2 receptor accessory protein 2	3
NP_001333475.1	1384	CRAT	600184	CRAT, CAT1, NBIA8	Carnitine acetyltransferase	3
NP_001333486.1	345611	IRGM	608212	IRGM, LRG47, IFI1, IBD19	Immunity-related GTPase family, M	3
NP_001333683.1	284098	PIGW	610275	PIGW, HPMRS5	Phosphatidylinositol glycan, class W	3
NP_001333866.1	282617	IFNL3	607402	IFNL3, IL28B	Interferon, lambda 3	3
NP_001334181.1	1588	CYP19A1	107910	CYP19A1, CYP19, ARO	Cytochrome P450, family 19, subfamily A, polypeptide 1 (aromatization of androgens)	3
NP_001334395.1	712	C1QA	120550	C1QA	Complement component 1, q subcomponent, A chain	3
NP_001334548.1	714	C1QC	120575	C1QC, C1QG	Complement component 1, q subcomponent, C chain	3
NP_001334595.1	90	ACVR1	102576	ACVR1, ACVRLK2, ALK2, FOP	Activin A receptor, type I	3
NP_001334633.1	79228	THOC6	615403	THOC6, FSAP35, BBIS	THO complex subunit 6	3
NP_001334757.1	5156	PDGFRA	173490	PDGFRA	Platelet-derived growth factor receptor, alpha polypeptide	3
NP_001334790.1	10613	ERLIN1	611604	ERLIN1, SPG62	Endoplasmic reticulum lipid raft-associated protein 1	3
NP_001334819.1	51075	TMX2	616715	TMX2, NEDMCMS	Thioredoxin-related transmembrane protein 2	3
NP_001334841.1	652	BMP4	112262	BMP4, BMP2B1, BMP2B, MCOPS6, OFC11	Bone morphogenetic protein-4	3
NP_001334970.1	27241	BBS9	607968	PTHB1, BBS9	Parathyroid hormone-responsive B1 gene	3
NP_001334985.1	7852	CXCR4	162643	CXCR4, D2S201E, NPY3R, WHIMS	Chemokine (C-X-C motif) receptor 4 (neuropeptide Y receptor Y3)	3
NP_001335010.1	10395	DLC1	604258	DLC1	DLC1 Rho GTPase activating protein	3
NP_001335359.1	7707	ZNF148	601897	ZNF148, ZFP148, GDACCF	Zinc finger protein-148	3
NP_001335658.1	57498	KIDINS220	615759	KIDINS220, ARMS, SINO	Kinase D-interacting substrate, 220kD	3
NP_001335842.1	51626	DYNC2LI1	617083	DYNC2LI1, D2LIC, LIC3, SRTD15	Dynein, cytoplasmic 2, light intermediate chain 1	3
NP_001335874.1	5243	ABCB1	171050	ABCB1, PGY1, MDR1, IBD13, CLCs	ATP-binding cassette, subfamily B, member 1 (P-glycoprotein-1/multiple drug resistance-1)	3
NP_001336091.1	8706	B3GALNT1	603094	B3GALT3, GLCT3, GLOB	UDP-galactose:beta-N-acetylglucosamine beta-1,3-galactosyltransferase 3	3
NP_001336275.1	11212	PLPBP	604436	PLPBP, PROSC, EPVB6D	Pyridoxal phosphate-binding protein	3
NP_001336347.1	54800	KLHL24	611295	KLHL24, KRIP6, EBSSH	Kelch-like 24	3
NP_001336584.1	10464	PIBF1	607532	PIBF1, JBTS33	Progesterone-induced blocking factor 1	3
NP_001336665.1	1436	CSF1R	164770	CSF1R, FMS, HDLS, BANDDOS	Colony-stimulating factor-1 receptor; oncogene FMS (McDonough feline sarcoma)	3
NP_001336678.1	8622	PDE8B	603390	PDE8B, PPNAD3, ADSD	Phosphodiesterase 8B	3
NP_001336728.1	83479	DDX59	615464	DDX59, OFD5	DEAD box polypeptide 59	3
NP_001336851.1	6155	RPL27	607526	RPL27, DBA16	Ribosomal protein L27	3
NP_001337011.1	219285	SAMD9L	611170	SAMD9L, ATXPC	Sterile alpha motif domain-containing 9-like	3
NP_001337165.1	28960	DCPS	610534	DCPS, HINT5, DCS1, ARS	Decapping enzyme, scavenger	3
NP_001337177.1	10806	SDCCAG8	613524	SDCCAG8, CCCAP, SLSN7, BBS16	Serologically defined colon cancer antigen 8	3
NP_001337182.1	57570	TRMT5	611023	TRMT5, TRM5, KIAA1393, COXPD26	tRNA methyltransferase 5	3
NP_001337434.1	57038	RARS2	611524	RARS2, RARSL, PCH6	Arginyl-tRNA synthetase 2	3
NP_001337461.1	57231	SNX14	616105	SNX14, SCAR20	Sorting nexin 14	3
NP_001337615.1	889	KRIT1	604214	CCM1, CAM, KRIT1	KREV interaction trapped 1	3
NP_001337882.1	64327	LMBR1	605522	LMBR1, ACHP, C7orf2, PPD2, THYP, LSS	Limb region 1, mouse, homolog of	3
NP_001337920.1	115286	SLC25A26	611037	SLC25A26, SAMC, COXPD28	Solute carrier family 25 (mitochondrial carrier, phosphate carrier), member 26	3
NP_001338099.1	22978	NT5C2	600417	NT5C2, NT5B, PNT5, SPG45	5' nucleotidase, cytosolic II	3
NP_001338307.1	80153	EDC3	609842	EDC3, YJDC, MRT50	Enhancer of mRNA decapping 3	3
NP_001338457.1	23064	SETX	608465	SETX, SCAN2, AOA2, ALS4	Senataxin	3
NP_001338557.1	255758	TCTEX1D2	617353	TCTEX1D2, SRTD17	TCTEX1 domain-containing protein 2	3
NP_001338587.1	23516	SLC39A14	608736	SLC39A14, ZIP14, KIAA0062, HMNDYT2, HCIN	Solute carrier family 39 (zinc transporter), member 14	3
NP_001339191.1	80199	FUZ	610622	FUZ, NTD	Fuzzy planar cell polarity protein	3
NP_001339431.1	55213	RCBTB1	607867	RCBTB1, CLLD7, GLP, RDEOA	RCC1 domain- and BTB domain-containing protein 1	3
NP_001339443.1	3141	HLCS	609018	HLCS, HCS	Holocarboxylase synthetase	3
NP_001340.2	1615	DARS	603084	DARS1, DARS, HBSL, HBSL	Aspartyl tRNA synthetase 1	3
NP_001340122.1	10585	POMT1	607423	POMT1, MDDGA1, MDDGB1, MDDGC1, LGMDR11	Protein O-mannosyltransferase 1	3
NP_001340852.1	23229	ARHGEF9	300429	ARHGEF9, PEM2, KIAA0424, EIEE8	Rho guanine nucleotide exchange factor 9	3
NP_001340896.1	10617	STAMBP	606247	STAMBP, AMSH, MICCAP	STAM binding protein	3
NP_001340912.1	1600	DAB1	603448	DAB1, SCA37	DAB adaptor protein 1	3
NP_001341275.1	715	C1R	613785	C1R, EDSPD1	Complement component-1, r subcomponent	3
NP_001341500.1	197	AHSG	138680	AHSG, APMR1	Alpha-2HS-glycoprotein	3
NP_001341533.1	4286	MITF	156845	MITF, WS2A, CMM8, COMMAD	Microphthalmia-associated transcription factor	3
NP_001341605.1	5580	PRKCD	176977	PRKCD, CVID9, ALPS3	Protein kinase C, delta	3
NP_001341618.1	5894	RAF1	164760	RAF1, CRAF, NS5, CMD1NN	Oncogene RAF1	3
NP_001341825.1	324	APC	611731	APC, GS, FPC, BTPS2	Adenomatous polyposis coli	3
NP_001341895.1	6690	SPINK1	167790	SPINK1, PSTI, PCTT, TATI, TCP	Serine protease inhibitor, Kazal type I (pancreatic secretory trypsin inhibitor)	3
NP_001341913.1	2264	FGFR4	134935	FGFR4	Fibroblast growth factor receptor-4	3
NP_001341935.1	4869	NPM1	164040	NPM1	Nucleophosmin 1 (nucleolar phosphoprotein B23, numatrin)	3
NP_001345.1	1646	AKR1C2	600450	AKR1C2, DDH2, DD2, HAKRD, SRXY8	Aldo-keto reductase family 1, member C2 (dihydrodiol dehydrogenase, type II)	3
NP_001345459.1	4337	MOCS1	603707	MOCS1, MOCODA	Molybdenum cofactor synthesis-1	3
NP_001347.3	1654	DDX3X	300160	DDX3X, DDX3, DBX, MRX102	DEAD/H box-3, X-linked	3
NP_001352.2	1723	DHODH	126064	DHODH, URA1, POADS	Dihydroorotate dehydrogenase	3
NP_001354.1	1736	DKC1	300126	DKC1, DKCX	Dyskerin	3
NP_001367.2	1778	DYNC1H1	600112	DYNC1H1, DNCL, DNECL, CMT20, MRD13, SMALED1	Dynein, cytoplasmic-1, heavy chain-1	3
NP_001369.1	1781	DYNC1I2	603331	DYNC1I2, DNCI2, IC2, NEDMIBA	Dynein, cytoplasmic-1, intermediate chain-2	3
NP_001374.3	1801	DPH1	603527	DPH1, DPH2L1, OVCA1, DEDSSH	Diphthamide biosynthesis protein 1	3
NP_001390.1	1896	EDA	300451	EDA, ED1, ECTD1, HED1, STHAGX1	Ectodysplasin A	3
NP_001405.1	1967	EIF2B1	606686	EIF2B1, EIF2BA	Eukaryotic translation initiation factor 2B, subunit 1	3
NP_001406.1	1968	EIF2S3	300161	EIF2S3, EIF2G, MEHMO, MRXSBRK	Eukaryotic translation initiation factor 2, subunit 3	3
NP_001420.2	2033	EP300	602700	EP300, RSTS2, MKHK2	E1A-binding protein, 300kD	3
NP_001431.1	2137	EXTL3	605744	EXTL3, EXTR1, ISDNA	Exostosin-like 3	3
NP_001432.2	2166	FAAH	602935	FAAH	Fatty acid amide hydrolase	3
NP_001439.2	2239	GPC4	300168	GPC4, KPTS	Glypican 4	3
NP_001442.2	2294	FOXF1	601089	FOXF1, FKHL5, ACDMPV	Forkhead box F1	3
NP_001444.2	2296	FOXC1	601090	FOXC1, FKHL7, FREAC3, IRID1, RIEG3, ASGD3	Forkhead, Drosophila, homolog-like 7	3
NP_001445.2	2302	FOXJ1	602291	FOXJ1, FKHL13, HFH4, CILD43	Forkhead box J1	3
NP_001449.3	2318	FLNC	102565	FLNC, FLN2, ABPA, ABPL, MFM5, MPD4, CMH26, RCM5	Filamin C (actin-binding protein-280)	3
NP_001454.2	2487	FRZB	605083	FRZB, FRZB1, SRFP3, OS1	Frizzled-related protein	3
NP_001457.1	2535	FZD2	600667	FZD2, OMOD2	Frizzled class receptor 2	3
NP_001472.1	2622	GAS8	605178	GAS8, GAS11, CILD33	Growth arrest-specific 8	3
NP_001473.1	2628	GATM	602360	GATM, AGAT, CCDS3	L-arginine:glycine amidinotransferase	3
NP_001477.2	2646	GCKR	600842	GCKR, GKRP, FGQTL5	Glucokinase (hexokinase 4) regulatory protein	3
NP_001483.3	2657	GDF1	602880	GDF1, DTGA3, DORV, RAI, CHTD6	Growth/differentiation factor 1	3
NP_001484.1	2664	GDI1	300104	GDI1, RABGD1A, MRX41, MRX48	GDP dissociation inhibitor 1	3
NP_001488.2	2683	B4GALT1	137060	B4GALT1, GGTB2, GT1, GTB, CDG2D	Glycoprotein-4-beta-galactosyltransferase-2 (EC 2.4.1.22)	3
NP_001489.1	2729	GCLC	606857	GCLC, GLCLC	Glutamate-cysteine ligase, catalytic subunit	3
NP_001510.2	2972	BRF1	604902	BRF1, TAF3C, GTF3B, TF3B90, CFDS	BRF1, S. cerevisiae, homolog of (TATA box-binding protein-associated factor 3C)	3
NP_001515.1	3060	HCRT	602358	HCRT, OX, NRCLP1	Hypocretin	3
NP_001531.1	3315	HSPB1	602195	HSPB1, HSP27, CMT2F, HMN2B	Heat-shock 27kD protein-1	3
NP_001544.1	3490	IGFBP7	602867	IGFBP7, MAC25, RAMSVPS	Insulin-like growth factor-binding protein-7	3
NP_001549.2	3587	IL10RA	146933	IL10RA, IL10R, IBD28	Interleukin-10 receptor, alpha	3
NP_001554.2	3617	IMPG1	602870	IMPG1, IPM150, VMD4	Interphotoreceptor matrix proteoglycan-1	3
NP_001596.2	16	AARS	601065	AARS1, AARS, CMT2N, EIEE29	Alanyl-tRNA synthetase 1	3
NP_001600.1	36	ACADSB	600301	ACADSB, SBCAD	Acyl-Coenzyme A dehydrogenase, short/branched chain	3
NP_001606.1	72	ACTG2	102545	ACTG2, ACTA3, VSCM	Actin, gamma-2, smooth muscle, enteric	3
NP_001612.1	196	AHR	600253	AHR, RP85	Aryl hydrocarbon receptor	3
NP_001616.1	204	AK2	103020	AK2	Adenylate kinase-2, mitochondrial	3
NP_001634.1	336	APOA2	107670	APOA2	Apolipoprotein A-II	3
NP_001642.1	362	AQP5	600442	AQP5, PPKB	Aquaporin-5	3
NP_001646.2	372	ARCN1	600820	ARCN1, SRMMD	Archain 1	3
NP_001655.1	387	RHOA	165390	RHOA, ARHA, ARH12, RHOH12, EDFAOB	Ras homolog gene family, member A (oncogene RHO H12)	3
NP_001671.2	486	FXYD2	601814	FXYD2, ATP1G1, HOMG2	FXYD domain-containing ion transport regulator 2 (sodium-potassium-ATPase, gamma polypeptide)	3
NP_001678.1	513	ATP5F1D	603150	ATP5F1D, ATP5D, MC5DN5	ATP synthase F1 subunit delta	3
NP_001681.2	523	ATP6V1A	607027	ATP6V1A, HO68, ARCL2D, IECEE3	ATPase, H+ transporting, V1 subunit A	3
NP_001684.2	526	ATP6V1B2	606939	ATP6V1B2, ATP6B2, VPP3, DOOD, ZLS2	ATPase, H+ transporting, V1 subunit B2	3
NP_001687.1	529	ATP6V1E1	108746	ATP6V1E1, ATP6E, ARCL2C	ATPase, H+ transporting, V1 subunit E1	3
NP_001699.1	611	OPN1SW	613522	OPN1SW, BCP, CBT	Blue cone pigment (opsin 1, short-wave-sensitive)	3
NP_001701.2	629	CFB	138470	CFB, BF, GBG, AHUS4, ARMD14, CFBD	Complement factor B	3
NP_001702.1	633	BGN	301870	BGN, SEMDX, MRLS	Biglycan	3
NP_001708.3	646	BNC1	601930	BNC1, POF16	Basonuclin	3
NP_001719.2	682	BSG	109480	BSG	Basigin (blood group OK)	3
NP_001728.1	735	C9	120940	C9, C9D, ARMD15	Complement component-9	3
NP_001741.4	831	CAST	114090	CAST, PLACK	Calpastatin	3
NP_001743.1	847	CAT	115500	CAT	Catalase	3
NP_001744.2	857	CAV1	601047	CAV1, BSCL3, CGL3, PPH3, LCCNS	Caveolin-1	3
NP_001745.2	861	RUNX1	151385	RUNX1, CBFA2, AML1	Runt-related transcription factor 1 (aml1 oncogene)	3
NP_001747.2	866	SERPINA6	122500	CBG, SERPINA6	Corticosteroid-binding globulin	3
NP_001750.1	894	CCND2	123833	CCND2, MPPH3	Cyclin D2	3
NP_001774.1	973	CD79A	112205	CD79A, IGA	CD79A antigen (immunoglobulin-associated alpha)	3
NP_001782.1	998	CDC42	116952	CDC42, TKS	Cell division cycle 42 (GTP-binding protein, 25kD)	3
NP_001784.2	1001	CDH3	114021	CDH3, CDHP, PCAD, HJMD	Cadherin-3 (P-cadherin)	3
NP_001796.2	1053	CEBPE	600749	CEBPE, CRP1	CCAAT/enhancer-binding protein (C/EBP), epsilon	3
NP_001798.2	1056	CEL	114840	CEL, BSSL, CELL, MODY8	Carboxyl-ester lipase (bile-salt stimulated lipase)	3
NP_001804.2	1062	CENPE	117143	CENPE, MCPH13	Centromere autoantigen E, 312kD	3
NP_001805.3	1075	CTSC	602365	CTSC, CPPI, PALS, PLS, HMS, PDON1, JPD	Cathepsin C	3
NP_001809.3	1109	AKR1C4	600451	AKR1C4, CHDR, CDR, HAKRA, DD4	Aldo-keto reductase family 1, member C4 (chlordecone reductase)	3
NP_001813.1	1123	CHN1	118423	CHN1, CHN, ARHGAP2, RHOGAP2, DURS2	Chimerin 1 (GTPase-activating protein, rho, 2)	3
NP_001821.2	1183	CLCN4	302910	CLCN4, MRX49, MRX15, MRXSRC	Chloride channel-4	3
NP_001834.2	1272	CNTN1	600016	CNTN1, MYPCN	Contactin 1	3
NP_001836.3	1282	COL4A1	120130	COL4A1, BSVD1, HANAC, ICH, BSVD, RATOR, PADMAL	Collagen IV, alpha-1 polypeptide	3
NP_001837.2	1284	COL4A2	120090	COL4A2, BSVD2, ICH	Collagen IV, alpha-2 polypeptide	3
NP_001839.2	1291	COL6A1	120220	COL6A1, BTHLM1, UCHMD1	Collagen VI, alpha-1 polypeptide	3
NP_001844.3	1299	COL9A3	120270	COL9A3, EDM3, IDD	Collagen IX, alpha-3 polypeptide	3
NP_001854.1	1340	COX6B1	124089	COX6B1	Cytochrome c oxidase, subunit VIb polypeptide 1 (ubiquitous)	3
NP_001857.1	1349	COX7B	300885	COX7B, LSDMCA2	Cytochrome c oxidase, subunit VIIb	3
NP_001879.1	1428	CRYM	123740	CRYM, DFNA40	Crystallin, mu	3
NP_001893.2	1491	CTH	607657	CTH	Cystathionine gamma-lyase	3
NP_001894.2	1495	CTNNA1	116805	CTNNA1, MDPT2	Catenin (cadherin-associated protein), alpha 1, 102kD	3
NP_001900.1	1509	CTSD	116840	CTSD, CPSD, CLN10	Cathepsin D (lysosomal aspartyl protease)	3
NP_001909.3	1629	DBT	248610	DBT, BCATE2	Dihydrolipoamide branched chain transacylase (E2 component of branched chain keto acid dehydrogenase complex)	3
NP_001918.3	1674	DES	125660	DES, CMD1I, MFM1, SCPNK	Desmin	3
NP_001921.1	1725	DHPS	600944	DHPS, NEDSSWI	Deoxyhypusine synthase	3
NP_001922.2	1737	DLAT	608770	DLAT, PDCE2	Dihydrolipoamide S-acetyltransferase	3
NP_001924.2	1743	DLST	126063	DLST, PGL7	Dihydrolipoamide S-succinyltransferase (E2 component of 2-oxo-glutarate complex)	3
NP_001932.2	1825	DSC3	600271	DSC3, DSC4	Desmocollin-3	3
NP_001933.2	1828	DSG1	125670	DSG1, PPKS1, SPPK1, EPKHE	Desmoglein-1	3
NP_001934.2	1829	DSG2	125671	DSG2, ARVD10, ARVC10, CMD1BB	Desmoglein-2	3
NP_001937.2	1848	DUSP6	602748	DUSP6, MKP3, PYST1, HH19	Dual-specificity phosphatase-6	3
NP_001948.1	1909	EDNRA	131243	EDNRA, MFDA	Endothelin receptor type A	3
NP_001949.1	1917	EEF1A2	602959	EEF1A2, EIEE33, MRD38	Eukaryotic translation elongation factor-1, alpha-2	3
NP_001952.1	1938	EEF2	130610	EEF2, EF2, SCA26	Eukaryotic translation elongation factor-2	3
NP_001957.2	1962	EHHADH	607037	EHHADH, PBFE, LBFP, FRTS3	Enoyl-Coenzyme A, hydratase/3-hydroxyacyl Coenzyme A dehydrogenase	3
NP_001963.1	1991	ELANE	130130	ELANE, ELA2, SCN1	Elastase, neutrophil-expressed	3
NP_001970.2	2053	EPHX2	132811	EPHX2	Epoxide hydrolase 2, cytoplasmic	3
NP_001973.2	2065	ERBB3	190151	ERBB3, LCCS2, FERLK	Transformation gene ERBB-3	3
NP_001978.1	2120	ETV6	600618	ETV6, TEL, THC5	ETS variant gene-6 (TEL oncogene)	3
NP_001990.2	2201	FBN2	612570	FBN2, CCA, EOMD	Fibrillin-2	3
NP_002001.1	2254	FGF9	600921	FGF9, SYNS3	Fibroblast growth factor-9 (glia-activating factor)	3
NP_002006.2	2308	FOXO1	136533	FOXO1A, FKHR	Forkhead box O1A (forkhead in rhabdomyosarcoma)	3
NP_002007.1	2312	FLG	135940	FLG, ATOD2	Filaggrin	3
NP_002008.2	2313	FLI1	193067	FLI1, BDPLT21	Friend leukemia virus integration 1	3
NP_002015.1	2332	FMR1	309550	FMR1, FRAXA, POF1	FMRP translational regulator 1	3
NP_002016.2	2334	AFF2	300806	AFF2, FMR2, FRAXE, MRX2	AF4/FMR2 family, member 2 (fragile site, X-linked, E)	3
NP_002023.2	2495	FTH1	134770	FTH1, FTHL6, HFE5	Ferritin, heavy polypeptide 1	3
NP_002026.1	2531	KDSR	136440	KDSR, FVT1, EKVP4	3-ketodihydrosphingosine reductase	3
NP_002038.2	2617	GARS	600287	GARS1, GARS, SMAD1, CMT2D, HMN5	Glycyl-tRNA synthetase 1	3
NP_002056.2	2752	GLUL	138290	GLUL, GLNS	Glutamate-ammonia ligase (glutamine synthase)	3
NP_002058.2	2767	GNA11	139313	GNA11, HHC2, HYPOC2	Guanine nucleotide-binding protein, Gq class, GNA11	3
NP_002061.1	2771	GNAI2	139360	GNAI2, GNAI2B, GIP	Guanine nucleotide-binding protein (G protein), alpha-inhibiting activity polypeptide-2	3
NP_002063.2	2776	GNAQ	600998	GNAQ, SWS, CMC1	Guanine nucleotide-binding protein (G protein), q	3
NP_002067.1	2799	GNS	607664	GNS, G6S	N-acetylglucosamine-6-sulfatase	3
NP_002070.1	2805	GOT1	138180	GOT1, ASTQTL1	Glutamic-oxaloacetic transaminase 1, soluble	3
NP_002071.2	2806	GOT2	138150	GOT2	Glutamic-oxaloacetic transaminase 2, mitochondrial	3
NP_002089.4	2979	GUCA1B	602275	GUCA1B, GCAP2, GUCA2, RP48	Guanylate cyclase activator 1B, retina	3
NP_002090.4	2993	GYPA	617922	GYPA, MN, GPA	Glycophorin A	3
NP_002092.1	2995	GYPC	110750	GYPC, GE, GPC	Glycophorin C	3
NP_002094.2	2997	GYS1	138570	GYS1, GYS	Glycogen synthase	3
NP_002099.1	3034	HAL	609457	HAL, HSTD	Histidine ammonia-lyase (histidase)	3
NP_002100.2	3035	HARS	142810	HARS1, HARS, USH3B, CMT2W	Histidyl-tRNA synthetase 1	3
NP_002102.4	3064	HTT	613004	HTT, HD, IT15, LOMARS	Huntingtin	3
NP_002104.2	3078	CFHR1	134371	CFHR1, FHR1, HFL1, CFHL1	Complement factor H-related 1	3
NP_002112.3	3115	HLA-DPB1	142858	HLA-DPB1	Major histocompatibility complex, class II, DP beta-1	3
NP_002113.2	3117	HLA-DQA1	146880	HLA-DQA1, CELIAC1	Major histocompatibility complex, class II, DQ alpha-1	3
NP_002124.1	3162	HMOX1	141250	HMOX1, HMOX1D	Heme oxygenase 1	3
NP_002130.2	27316	RBMX	300199	RBMX, MRXS11	RNA-binding motif protein, X chromosome	3
NP_002135.2	3211	HOXB1	142968	HOXB1, HOX2I, HCFP3	Homeo box-B1	3
NP_002139.2	3236	HOXD10	142984	HOXD10, HOX4D	Homeo box-D10	3
NP_002141.1	3242	HPD	609695	HPD	4-hydroxyphenylpyruvate dioxygenase	3
NP_002152.2	3376	IARS	600709	IARS1, IARS, GRIDHH	Isoleucine-tRNA synthetase 1	3
NP_002159.2	3418	IDH2	147650	IDH2, IDPM, D2HGA2	Isocitrate dehydrogenase, mitochondrial	3
NP_002171.2	3508	IGHMBP2	600502	IGHMBP2, SMUBP2, CATF1, SMARD1, HMN6, CMT2S	Immunoglobulin mu binding protein 2	3
NP_002172.2	3549	IHH	600726	IHH, BDA1	Indian hedgehog	3
NP_002175.2	3572	IL6ST	600694	IL6ST, HIES4	Interleukin-6 signal transducer (gp130, oncostatin M receptor)	3
NP_002176.2	3575	IL7R	146661	IL7R, IL7RA, CD127	Interleukin-7 receptor	3
NP_002178.2	3593	IL12B	161561	IL12B, NKSF2, IMD29	Interleukin-12B (natural killer cell stimulatory factor-2, cytotoxic lymphocyte maturation factor-2, p40)	3
NP_002179.2	3596	IL13	147683	IL13, ALRH, BHR1	Interleukin-13	3
NP_002189.1	3659	IRF1	147575	IRF1, MAR	Interferon regulatory factor-1	3
NP_002195.1	3675	ITGA3	605025	ITGA3, CD49C, GAPB3, ILNEB	Integrin, alpha-3	3
NP_002224.1	3739	KCNA4	176266	KCNA4, KCNA8, MCIDDS	Potassium voltage-gated channel, shaker-related subfamily, member 4	3
NP_002225.2	3741	KCNA5	176267	KCNA5, ATFB7	Potassium voltage-gated channel, shaker-related subfamily, member 5	3
NP_002231.1	3763	KCNJ6	600877	KCNJ6, GIRK2, KCNJ7, KPLBS	Potassium inwardly-rectifying channel, subfamily J, member 6	3
NP_002232.2	3766	KCNJ10	602208	KCNJ10, SESAME	Potassium inwardly-rectifying channel, subfamily J, member 10	3
NP_002233.2	3769	KCNJ13	603208	KCNJ13, SVD, LCA16	Potassium inwardly-rectifying channel, subfamily J, member 13	3
NP_002237.1	3777	KCNK3	603220	KCNK3, TASK, PPH4	Potassium channel, subfamily K, member 3	3
NP_002241.1	3783	KCNN4	602754	KCNN4, KCA4, SK4, DHS2	Potassium intermediate/small conductance calcium-activated channel, subfamily N, member 4	3
NP_002244.1	3791	KDR	191306	KDR	Kinase insert domain receptor	3
NP_002247.3	3814	KISS1	603286	KISS1, HH13	KISS1 metastasis suppressor	3
NP_002248.1	3816	KLK1	147910	KLK1, KLKR	Kallikrein 1	3
NP_002263.3	3851	KRT4	123940	KRT4, CYK4, WSN1	Keratin 4	3
NP_002272.2	3887	KRT81	602153	KRT81, KRTHB1, HB1	Keratin 81	3
NP_002273.3	3889	KRT83	602765	KRT83, KRTHB3, HB3, MNLIX, EKVP5	Keratin 83	3
NP_002274.1	3891	KRT85	602767	KRT85, KRTHB5, HB5, ECTD4	Keratin 85	3
NP_002290.2	3938	LCT	603202	LCT, LAC, LPH	Lactase (lactase-phlorizin hydrolase)	3
NP_002294.2	3953	LEPR	601007	LEPR, OBR, LEPRD	Leptin receptor	3
NP_002308.2	4015	LOX	153455	LOX, AAT10	Lysyl oxidase	3
NP_002325.2	4038	LRP4	604270	LRP4, MEGF7, CLSS, SOST2, CMS17	Low density lipoprotein receptor-related protein 4	3
NP_002327.2	4040	LRP6	603507	LRP6, ADCAD2, STHAG7	Low density lipoprotein receptor-related protein 6	3
NP_002328.1	4043	LRPAP1	104225	LRPAP1, A2MRAP, MYP23	Low density lipoprotein-related protein-associated protein 1 (alpha-2-macroglobulin receptor-associated protein 1)	3
NP_002342.1	4068	SH2D1A	300490	SH2D1A, LYP, IMD5, XLP, XLPD1	SH2 domain protein 1A	3
NP_002344.2	4070	TACSTD2	137290	TACSTD2, TROP2, M1S1	Tumor-associated calcium signal transducer 2	3
NP_002345.2	4072	EPCAM	185535	EPCAM, ACSTD1, TROP1, M4S1, MIC18, DIAR5, HNPCC8	Epithelial cellular adhesion molecule	3
NP_002352.1	4099	MAG	159460	MAG, GMA, SPG75	Myelin-associated glycoprotein	3
NP_002372.1	4148	MATN3	602109	MATN3, EDM5, HOA, OS2	Matrilin 3	3
NP_002373.3	4149	MAX	154950	MAX	MAX protein	3
NP_002377.4	4157	MC1R	155555	MC1R, SHEP2, CMM5	Melanocortin-1 receptor (alpha melanocyte-stimulating hormone receptor)	3
NP_002383.2	4193	MDM2	164785	MDM2, ACTFS, LSKB	MDM2 protooncogene	3
NP_002399.1	4247	MGAT2	602616	MGAT2, CDGS2, CDG2A	Mannosyl (alpha-1,6-)-glycoprotein beta-1,2-N-acetylglucosaminyl- transferase	3
NP_002406.1	4282	MIF	153620	MIF	Macrophage migration inhibitory factor	3
NP_002412.1	4312	MMP1	120353	MMP1, CLG	Matrix metalloproteinase 1 (interstitial collagenase)	3
NP_002413.1	4314	MMP3	185250	MMP3, STMY1, CHDS6	Matrix metalloproteinase 3 (stromelysin 1, progelatinase)	3
NP_002418.1	4322	MMP13	600108	MMP13, CLG3, MANDP1, MDST	Matrix metalloproteinase 13 (collagenase 3)	3
NP_002420.1	4327	MMP19	601807	MMP19, MMP18, CODA	Matrix metalloproteinase-19	3
NP_002421.3	4330	MN1	156100	MN1, MGCR	MN1 protooncogene, transcriptional regulator	3
NP_002426.1	4351	MPI	154550	MPI, PMI1, CDG1B	Mannosephosphate isomerase (phosphomannose isomerase 1)	3
NP_002430.3	4437	MSH3	600887	MSH3, FAP4	mutS homolog 3	3
NP_002434.1	4477	MSMB	157145	MSMB, HPC13	Microseminoprotein, beta	3
NP_002439.2	4487	MSX1	142983	MSX1, HOX7, HYD1, OFC5, STHAG1, ECTD3	MSH homeobox 1	3
NP_002440.2	4488	MSX2	123101	MSX2, CRS2, HOX8	msh homeobox 2	3
NP_002442.2	4507	MTAP	156540	MTAP, DMSMFH	Methylthioadenosine phosphorylase	3
NP_002449.2	727897	MUC5B	600770	MUC5B	Mucin 5, subtype B, tracheobronchial	3
NP_002451.2	3662	IRF4	601900	IRF4, LSIRF, SHEP8	Interferon regulatory factor-4	3
NP_002458.2	4609	MYC	190080	MYC	MYC protooncogene, bHLH transcription factor	3
NP_002462.2	4624	MYH6	160710	MYH6, ASD3, MYHCA, CMD1EE, CMH14, SSS3	Myosin, heavy polypeptide-6, cardiac muscle, alpha	3
NP_002463.2	4626	MYH8	160741	MYH8, DA7	Myosin, heavy polypeptide-8, skeletal muscle, perinatal	3
NP_002476.2	4683	NBN	602667	NBN, NBS1	Nibrin	3
NP_002478.1	4692	NDN	602117	NDN	Necdin	3
NP_002479.1	4695	NDUFA2	602137	NDUFA2, MC1DN13	NADH-ubiquinone oxidoreductase subunit A2	3
NP_002481.2	4700	NDUFA6	602138	NDUFA6, MC1DN33	NADH-ubiquinone oxidoreductase subunit A6	3
NP_002482.1	4709	NDUFB3	603839	NDUFB3, MC1DN25	NADH-ubiquinone oxidoreductase subunit B3	3
NP_002486.1	4724	NDUFS4	602694	NDUFS4, AQDQ, MC1DN1	NADH-ubiquinone oxidoreductase subunit S4	3
NP_002487.1	4728	NDUFS8	602141	NDUFS8, MC1DN2	NADH-ubiquinone oxidoreductase core subunit S8	3
NP_002488.1	4751	NEK2	604043	NEK2, RP67	Never in mitosis gene a-related kinase 2	3
NP_002491.2	4760	NEUROD1	601724	NEUROD1, NIDDM	Neurogenic differentiation 1	3
NP_002515.1	4893	NRAS	164790	NRAS, ALPS4, NS6, CMNS, NCMS	NRAS protooncogene, GTPase	3
NP_002517.1	4907	NT5E	129190	NT5E, NT5	5' nucleotidase, ecto (CD73)	3
NP_002520.2	4914	NTRK1	191315	NTRK1, TRKA	Neurotrophic tyrosine kinase, receptor, type 1	3
NP_002530.1	4953	ODC1	165640	ODC1	Ornithine decarboxylase-1	3
NP_002534.1	4973	OLR1	602601	OLR1, LOX1	Low density lipoprotein, oxidized, receptor 1	3
NP_002537.3	4982	TNFRSF11B	602643	TNFRSF11B, OPG, OCIF, PDB5	Tumor necrosis factor receptor superfamily, member 11B (osteoprotegerin)	3
NP_002538.1	4983	OPHN1	300127	OPHN1, MRX60	Oligophrenin-1	3
NP_002573.1	5073	PARN	604212	PARN, DAN, DKCB6, PFBMFT4	Polyadenylate-specific ribonuclease	3
NP_002575.1	5081	PAX7	167410	PAX7, RMS2, MYOSCO	Paired box homeotic gene-7	3
NP_002582.3	5105	PCK1	614168	PCK1, PCKDC	Phosphoenolpyruvate carboxykinase-1 (soluble)	3
NP_002583.1	5111	PCNA	176740	PCNA, ATLD2	Proliferating cell nuclear antigen	3
NP_002592.1	5147	PDE6D	602676	PDE6D, JBTS22	Phosphodiesterase 6D, cGMP-specific, rod, delta	3
NP_002599.1	5155	PDGFB	190040	PDGFB, SIS, IBGC5	Platelet-derived growth factor, beta polypeptide (oncogene SIS)	3
NP_002606.3	5176	SERPINF1	172860	SERPINF1, PEDF, OI6	Serpin peptidase inhibitor, clade F, member 1	3
NP_002609.1	5194	PEX13	601789	PEX13, ZWS, NALD, PBD11A, PBD11B	Peroxisome biogenesis factor 13 (peroxin 13)	3
NP_002628.2	5255	PHKA1	311870	PHKA1	Phosphorylase kinase, muscle, alpha polypeptide	3
NP_002632.1	5277	PIGA	311770	PIGA, PNH1, MCAHS2	Phosphatidylinositol glycan, class A	3
NP_002633.1	5279	PIGC	601730	PIGC, GPI2, GPIBD16, MRT62	Phosphatidylinositol glycan, class C	3
NP_002644.4	5307	PITX1	602149	PITX1, PTX1, BFT, POTX, CCF, LBNBG	Paired-like homeodomain transcription factor-1	3
NP_002646.2	5324	PLAG1	603026	PLAG1, SGPA, PSA	Pleomorphic adenoma gene 1	3
NP_002652.2	5336	PLCG2	600220	PLCG2, FCAS3, APLAID	Phospholipase C, gamma 2	3
NP_002653.1	5337	PLD1	602382	PLD1, CVDD	Phospholipase D1, phosphatidylcholine-specific	3
NP_002658.1	5350	PLN	172405	PLN, PLB, CMD1P, CMH18	Phospholamban	3
NP_002668.1	5375	PMP2	170715	PMP2, CMT1G	Peripheral myelin protein-2	3
NP_002684.1	5428	POLG	174763	POLG, POLG1, POLGA, PEO, SANDO, SCAE, MTDPS4A, MTDPS4B, MIRAS	Polymerase (DNA directed), gamma	3
NP_002691.1	5459	POU4F3	602460	POU4F3, BRN3C	POU domain, class 4, transcription factor-3	3
NP_002700.1	5500	PPP1CB	600590	PPP1CB, NSLH2	Protein phosphatase-1, catalytic subunit, beta isoform	3
NP_002702.2	5506	PPP1R3A	600917	PPP1R3A, PPP1R3	Protein phosphatase 1, regulatory subunit 3A	3
NP_002706.1	5515	PPP2CA	176915	PPP2CA, NEDLBA	Protein phosphatase-2 (formerly 2A), catalytic subunit, alpha isoform	3
NP_002723.2	5568	PRKACG	176893	PRKACG, BDPLT19	Protein kinase, cAMP-dependent, catalytic, gamma	3
NP_002728.1	5578	PRKCA	176960	PRKCA, PKCA	Protein kinase C, alpha polypeptide	3
NP_002746.1	5604	MAP2K1	176872	MAP2K1, PRKMK1, MKK1, MEK1, CFC3	Mitogen-activated protein kinase kinase 1	3
NP_002755.1	5631	PRPS1	311850	PRPS1, CMTX5, DFNX1, DFN2	Phosphoribosyl pyrophosphate synthetase-1	3
NP_002766.1	5654	HTRA1	602194	HTRA1, PRSS11, ARMD7, CARASIL, CADASIL2	HTRA serine peptidase 1	3
NP_002782.1	5687	PSMA6	602855	PSMA6, PROS27, P27K	Proteasome subunit, alpha-type, 6	3
NP_002787.2	5692	PSMB4	602177	PSMB4, PRAAS3	Proteasome subunit, beta type, 4	3
NP_002791.1	5698	PSMB9	177045	PSMB9, LMP2, RING12, PRAAS3	Proteasome subunit, beta type, 9	3
NP_002818.1	5770	PTPN1	176885	PTPN1, PTP1B	Protein tyrosine phosphatase, nonreceptor-type, 1	3
NP_002826.3	5782	PTPN12	600079	PTPN12, PTPG1	Protein tyrosine phosphatase, nonreceptor-type, 12	3
NP_002829.3	5788	PTPRC	151460	PTPRC, CD45, LCA	Protein tyrosine phosphatase, receptor type, c polypeptide	3
NP_002846.3	5818	NECTIN1	600644	NECTIN1, PVRL1, HVEC, PVRR1, PRR1, ED4, OFC7, CLPED1	Nectin 1	3
NP_002848.1	5824	PEX19	600279	PEX19, PXF, HK33, D1S2223E, PBD12A	Peroxisome biogenesis factor 19 (peroxisomal farnesylated protein)	3
NP_002854.3	5836	PYGL	613741	PYGL	Phosphorylase, glycogen, liver	3
NP_002863.1	5880	RAC2	602049	RAC2	Rac family small GTPase 2	3
NP_002878.2	5917	RARS	107820	RARS1, RARS, HLD9	Arginyl-tRNA synthetase 1	3
NP_002881.1	5921	RASA1	139150	RASA1, GAP, CMAVM1, PKWS	RAS p21 protein activator 1 (GTPase activating protein)	3
NP_002891.1	5949	RBP3	180290	RBP3, RP66	Retinol-binding protein-3, interstitial	3
NP_002896.2	5959	RDH5	601617	RDH5	Retinol dehydrogenase-5	3
NP_002912.2	5995	RGR	600342	RGR, RP44	Retinal G protein coupled receptor	3
NP_002920.1	6011	GRK1	180381	GRK1, RHOK, RK	G protein-dependent receptor kinase 1 (rhodopsin kinase)	3
NP_002927.2	246243	RNASEH1	604123	RNASEH1, PEOB2	Ribonuclease H1	3
NP_002950.3	6272	SORT1	602458	SORT1, NT3, LDLCQ6	Sortilin	3
NP_002959.2	6299	SALL1	602218	SALL1, HSAL1, TBS	Sal-like 1	3
NP_002964.3	6311	ATXN2	601517	ATXN2, ATX2, SCA2, ASL13	Ataxin-2	3
NP_002970.2	6342	SCP2	184755	SCP2	Sterol carrier protein-2	3
NP_002973.1	6347	CCL2	158105	CCL2, SCYA2, MCP1, MCAF	Small inducible cytokine A2 (monocyte chemotactic protein, homologous to mouse Sig-je)	3
NP_002977.1	6356	CCL11	601156	CCL11, SCYA11	Chemokine, C-C motif, ligand 11	3
NP_002991.2	6390	SDHB	185470	SDHB, SDH2, SDHIP, PGL4	Succinate dehydrogenase complex, subunit B, iron sulfur (Ip)	3
NP_002992.1	6391	SDHC	602413	SDHC, PGL3	Succinate dehydrogenase complex, subunit C, integral membrane protein, 15kD	3
NP_002993.1	6392	SDHD	602690	SDHD, PGL1	Succinate dehydrogenase complex, subunit D, integral membrane protein	3
NP_003005.2	6424	SFRP4	606570	SFRP4, FRPHE, PYL	Secreted frizzled-related protein 4	3
NP_003009.2	6440	SFTPC	178620	SFTPC, SFTP2, SMDP2	Surfactant, pulmonary-associated protein C (pulmonary surfactant apoprotein-2, SP-C)	3
NP_003029.2	6509	SLC1A4	600229	SLC1A4, SATT, ASCT1, SPATCCM	Solute carrier family 1 (glutamate/neutral amino acid transporter), member 4	3
NP_003038.2	6548	SLC9A1	107310	SLC9A1, NHE1, APNH, LIKNS	Solute carrier family 9 (sodium/hydrogen exchanger), member 1 (antiporter, Na+/H+, amiloride sensitive)	3
NP_003042.3	6566	SLC16A1	600682	SLC16A1, MCT1, HHF7, MCT1D	Solute carrier family 16 (monocarboxylic acid transporters), member 1	3
NP_003043.3	6569	SLC34A1	182309	SLC34A1, SLC17A2, NPT2, NPHLOP1, FRTS2, HCINF2	Solute carrier family 34 (sodium phosphate cotransporter), member 1	3
NP_003045.2	6571	SLC18A2	193001	SLC18A2, VAT2, SVMT, PKDYS2	Solute carrier family 18 (vesicular monoamine), member 2	3
NP_003046.2	6572	SLC18A3	600336	SLC18A3, VACHT, CMS21	Solute carrier family 18 (vesicular acetylcholine), member 3	3
NP_003050.2	6583	SLC22A4	604190	SLC22A4, OCTN1	Solute carrier family 22 (organic cation transporter), member 4	3
NP_003059.1	6591	SNAI2	602150	SNAI2, SLUG, WS2D	snail, Drosophila, homolog of, 2 (Neural crest transcription factor SLUG)	3
NP_003070.3	6605	SMARCE1	603111	SMARCE1, BAF57, CSS5	SWI/SNF-related, matrix-associated, actin-dependent regulator of chromatin, subfamily E, member 1	3
NP_003085.1	6635	SNRPE	128260	SNRPE, HYPT11	Small nuclear ribonucleoprotein polypeptide E	3
NP_003089.1	6640	SNTA1	601017	SNTA1, SNT1, TACIP1, LQT12	Syntrophin, alpha-1	3
NP_003093.2	6649	SOD3	185490	SOD3	Superoxide dismutase-3, extracellular	3
NP_003097.1	6657	SOX2	184429	SOX2, MCOPS3	SRY (sex determining region Y)-box 2	3
NP_003098.1	6659	SOX4	184430	SOX4, CSS10	SRY (sex determining region Y)-box 4	3
NP_003099.1	6664	SOX11	600898	SOX11, MRD27, CSS9	SRY (sex-determining region Y)-box 11	3
NP_003115.1	6697	SPR	182125	SPR	Sepiapterin reductase	3
NP_003127.1	6729	SRP54	604857	SRP54, SCN8	Signal recognition particle, 54kD	3
NP_003131.1	6736	SRY	480000	SRY, TDF, TDY, SRXX1, SRXY1	Sex-determining region Y (testis determining factor)	3
NP_003138.3	6757	SSX2	300192	SSX2	Sarcoma, synovial, X breakpoint 2	3
NP_003150.1	6792	CDKL5	300203	CDKL5, STK9, ISSX, EIEE2	Cyclin-dependent kinase-like 5 (serine/threonine protein kinase 9)	3
NP_003156.1	6812	STXBP1	602926	STXBP1, UNC18, EIEE4	Syntaxin-binding protein 1	3
NP_003163.1	6834	SURF1	185620	SURF1, CMT4K	Surfeit-1	3
NP_003170.1	6855	SYP	313475	SYP, MRXSYP	Synaptophysin	3
NP_003174.3	6868	ADAM17	603639	ADAM17, TACE, NISBD1	ADAM metallopeptidase domain 17	3
NP_003185.1	6908	TBP	600075	TBP, SCA17, HDL4	TATA box binding protein	3
NP_003192.1	7019	TFAM	600438	TFAM, TCF6L2, TCF6L1, TCF6L3, MTTF1, TCF6, MTDPS15	Transcription factor A, mitochondrial	3
NP_003203.1	6997	TDGF1	187395	TDGF1	Teratocarcinoma-derived growth factor-1	3
NP_003226.4	7038	TG	188450	TG, AITD3, TDH3	Thyroglobulin	3
NP_003236.3	7053	TGM3	600238	TGM3, UHS2	Transglutaminase-3 (E polypeptide, protein-glutamine-gamma-glutamyl transferase)	3
NP_003238.2	7058	THBS2	188061	THBS2	Thrombospondin 2	3
NP_003256.1	7098	TLR3	603029	TLR3, IIAE2	Toll-like receptor-3	3
NP_003271.1	7134	TNNC1	191040	TNNC1, CMD1Z, CMH13	Troponin-C1, slow	3
NP_003274.3	7138	TNNT1	191041	TNNT1, ANM, NEM5	Troponin-T1, skeletal, slow	3
NP_003277.1	7150	TOP1	126420	TOP1	Topoisomerase (DNA) I	3
NP_003300.1	7259	TSPYL1	604714	TSPYL1, TSPYL, SIDDT	Y-encoded testis-specific protein-like	3
NP_003311.2	7275	TUB	601197	TUB, RDOB	Tubby, mouse, homolog of	3
NP_003312.3	7284	TUFM	602389	TUFM, EFTU, COXPD4	Tu translation elongation factor, mitochondrial	3
NP_003313.3	7287	TULP1	602280	TULP1, RP14, LCA15	Tubby-like protein-1	3
NP_003323.1	7305	TYROBP	604142	TYROBP, DAP12, PLOSL1	TYRO protein tyrosine kinase-binding protein	3
NP_003327.2	7319	UBE2A	312180	UBE2A, RAD6A, MRXSN, MRXS30	Ubiquitin-conjugating enzyme E2A (RAD6 homolog)	3
NP_003347.1	7352	UCP3	602044	UCP3	Uncoupling protein-3	3
NP_003357.2	7385	UQCRC2	191329	UQCRC2, MC3DN5	Ubiquinol-cytochrome c reductase core protein II	3
NP_003374.3	7436	VLDLR	192977	VLDLR, CAMRQ1	Very low density lipoprotein receptor	3
NP_003378.3	7456	WIPF1	602357	WIPF1, WASPIP, WIP, WAS2	WAS/WASL-interacting protein family, member 1	3
NP_003385.2	7480	WNT10B	601906	WNT10B, SHFM6, STHAG8	Wingless-type MMTV integration site family, member 10B	3
NP_003390.4	7512	XPNPEP2	300145	XPNPEP2, AEACEI	X-prolyl aminopeptidase 2 (aminopeptidase P)	3
NP_003394.1	7528	YY1	600013	YY1, GADEVS	YY1 transcription factor	3
NP_003403.2	7545	ZIC1	600470	ZIC1, CRS6, BAIDCS	Zic family, member 1	3
NP_003404.1	7547	ZIC3	300265	ZIC3, HTX1, HTX, VACTERLX	Zic family, member 3	3
NP_003456.1	1118	CHIT1	600031	CHIT, CHITD	Chitotriosidase	3
NP_003457.1	7849	PAX8	167415	PAX8	Paired box homeotic gene-8	3
NP_003467.1	8048	CSRP3	600824	CSRP3, CRP3, CLP, CMD1M, CMH12	Cysteine- and glycine-rich protein 3	3
NP_003468.2	8050	PDHX	608769	PDHX, PDX1, E3BP, PDHXD	Pyruvate dehydrogenase complex, lipoyl-containing component X	3
NP_003471.1	8076	MFAP5	601103	MFAP5, MAGP2, AAT9	Microfibril-associated protein 5	3
NP_003482.1	8260	NAA10	300013	NAA10, ARD1A, ARD1, TE2, NATD, OGDNS, MCOPS1	N-alpha-acetyltransferase 10, NatA catalytic subunit	3
NP_003570.2	8438	RAD54L	603615	RAD54L, HR54, HRAD54	RAD54 like	3
NP_003578.2	8449	DHX16	603405	DHX16, DDX16, DBP2, PRP8, NMOAS	DEAH (Asp-Glu-Ala-His) box polypeptide 16	3
NP_003588.1	8462	KLF11	603301	KLF11, TIEG2, FKLF1, FKLF, MODY7	Kruppel-like factor 11	3
NP_003602.1	8481	OFD1	300170	OFD1, CXorf5, SGBS2, JBTS10, RP23	OFD1 centriole and centriolar satellite protein	3
NP_003603.1	8482	SEMA7A	607961	SEMA7A, SEMAL, SEMAK1, CDW108, JMH	Semaphorin 7A	3
NP_003610.2	8492	PRSS12	606709	PRSS12, BSSP3, MRT1	Protease, serine, 12	3
NP_003611.1	8493	PPM1D	605100	PPM1D, WIP1, JDVS	Protein phosphatase, magnesium-dependent, 1, delta isoform	3
NP_003621.1	8504	PEX3	603164	PEX3, PBD10A, PBD10B	Peroxisomal biogenesis factor-3	3
NP_003623.1	8506	CNTNAP1	602346	CNTNAP1, CASPR, P190, CHN3	Contactin-associated protein 1	3
NP_003629.2	8516	ITGA8	604063	ITGA8, RHDA1	Integrin, alpha-8	3
NP_003650.1	8540	AGPS	603051	AGPS, ADHAPS, RCDP3	Alkylglycerone-phosphate synthase	3
NP_003655.3	8546	AP3B1	603401	AP3B1, ADTB3A, HPS2	Adaptor-related protein complex 3, beta 1 subunit (adaptin, beta-3a)	3
NP_003656.2	8547	FCN3	604973	FCN3, HAKA1	Ficolin 3	3
NP_003664.1	8557	TCAP	604488	TCAP, LGMDR7, CMH25	Telethonin	3
NP_003667.1	8560	DEGS1	615843	DEGS1, DES1, MLD, HLD18	Delta(4)-desaturase, sphingolipid, 1	3
NP_003671.1	8565	YARS	603623	YARS1, YARS, CMTDIC, TYRRS, YTS, YRS	Tyrosyl-tRNA synthetase 1	3
NP_003678.2	8572	PDLIM4	603422	RIL	LIM domain protein ril	3
NP_003681.1	8575	PRKRA	603424	PRKRA, PACT, RAX, DYT16	Protein kinase, interferon-inducible double-stranded RNA-dependent activator	3
NP_003692.1	8600	TNFSF11	602642	TNFSF11, OPGL, TRANCE, OPTB2	Tumor necrosis factor ligand superfamily, member 11 (osteoprotegerin ligand)	3
NP_003696.2	8604	SLC25A12	603667	SLC25A12, ARALAR, EIEE39	Solute carrier family 25 (mitochondrial carrier, Aralar), member 12	3
NP_003713.3	8626	TP63	603273	TP63, TP73L, KET, EEC3, SHFM4, LMS, RHS, OFC8	Tumor protein p63 (tumor protein p73-like)	3
NP_003721.2	8635	RNASET2	612944	RNASET2, RNASE6PL	Ribonuclease T2	3
NP_003728.1	8642	DCHS1	603057	DCHS1, PCDH16, FIB1, CDH19, VMLDS1, MVP2	Dachsous, Drosophila, homolog of, 1	3
NP_003729.3	8643	PTCH2	603673	PTCH2	Patched 2	3
NP_003739.2	8659	ALDH4A1	606811	ALDH4A1, ALDH4, P5CDH	Aldehyde dehydrogenase 4 family, member A1 (delta-1-pyrroline 5-carboxylate dehydrogenase)	3
NP_003740.2	8660	IRS2	600797	IRS2	Insulin receptor substrate 2	3
NP_003745.1	8665	EIF3F	603914	EIF3F, EIF3S5, MRT67	Eukaryotic translation initiation factor 3, subunit F	3
NP_003782.1	8720	MBTPS1	603355	MBTPS1, S1P, SEDKF	Membrane-bound transcription factor protease, site 1	3
NP_003784.2	8722	CTSF	603539	CTSF, CLN13	Cathepsin F	3
NP_003792.1	8733	GPAA1	603048	GPAA1, GAA1, GPIBD15	Glycophosphatidylinositol anchor attachment protein 1	3
NP_003795.2	8737	RIPK1	603453	RIPK1, RIP1, RIP, IMD57	Receptor-interacting serine/threonine kinase 1	3
NP_003815.1	8772	FADD	602457	FADD	FAS-associating protein with death domain	3
NP_003826.2	8787	RGS9	604067	RGS9, PERRS	Regulator of G protein signaling 9	3
NP_003833.4	8795	TNFRSF10B	603612	TNFRSF10B, DR5, TRAILR2	Tumor necrosis factor receptor superfamily, member 10B	3
NP_003837.1	8799	PEX11B	603867	PEX11B, PEX14B	Peroxisome biogenesis 11B	3
NP_003840.2	8802	SUCLG1	611224	SUCLG1, SUCLA1, MTDPS9	Succinate-CoA ligase, alpha subunit	3
NP_003841.1	8803	SUCLA2	603921	SUCLA2, MTDPS5	Succinate-CoA ligase, ADP-forming, beta subunit	3
NP_003854.1	8818	DPM2	603564	DPM2, CDG1U	Dolichyl-phosphate mannosyltransferase 2, regulatory subunit	3
NP_003856.1	8820	HESX1	601802	HESX1, RPX, CPHD5	Homeo box gene expressed in ES cells	3
NP_003859.1	8823	FGF16	300827	FGF16, MF4	Fibroblast growth factor 16	3
NP_003886.3	8867	SYNJ1	604297	SYNJ1, PARK20, EIEE53	Synaptojanin 1	3
NP_003887.3	8869	ST3GAL5	604402	SIAT9, ST3GALV, SPDRS	Sialyltransferase 9	3
NP_003891.1	8878	SQSTM1	601530	SQSTM1, P62, PDB3, FTDALS3, NADGP, DMRV	Sequestosome 1	3
NP_003898.2	8893	EIF2B5	603945	EIF2B5, LVWM, CACH, CLE	Eukaryotic translation initiation factor 2B, subunit 5	3
NP_003915.2	8929	PHOX2B	603851	PHOX2B, NBPHOX, PMX2B, NBLST2, CCHS	Paired mesoderm homeo box 2B	3
NP_003922.1	8936	WASF1	605035	WASF1, WAVE, WAVE1, SCAR1, NEDALVS	WAS protein family member 1	3
NP_003981.3	5076	PAX2	167409	PAX2, PAPRS, FSGS7	Paired box homeotic gene-2	3
NP_004022.2	3665	IRF7	605047	IRF7, IRF7A, IRF7B, IRF7C, IRF7H, IMD39	Interferon regulatory factor 7	3
NP_004035.2	471	ATIC	601731	ATIC, PURH, AICAR	5-aminoimidazole-4-carboxyamide ribonucleotide formyltransferase/IMP cyclohydrolase	3
NP_004055.1	1027	CDKN1B	600778	CDKN1B, KIP1, CDKN4, MEN4	Cyclin-dependent kinase inhibitor 1B (p27, Kip1)	3
NP_004061.3	1187	CLCNKA	602024	CLCNKA	Chloride channel, kidney, A	3
NP_004065.1	1351	COX8A	123870	COX8A	Cytochrome c oxidase, subunit VIIIA	3
NP_004073.2	1639	DCTN1	601143	DCTN1, HMN7B	Dynactin 1 (p150, glued, Drosophila, homolog of)	3
NP_004076.1	1678	TIMM8A	300356	TIMM8A, DFN1, DDP, MTS, DDP1	Translocase of inner mitochondrial membrane 8, yeast, homolog of, A	3
NP_004083.3	1892	ECHS1	602292	ECHS1, SCEH, ECHS1D	Enoyl-CoA hydratase, short-chain, 1, mitochondrial	3
NP_004089.1	2018	EMX2	600035	EMX2	Empty spiracles homeobox 2	3
NP_004110.2	2322	FLT3	136351	FLT3	fms-related tyrosine kinase-3	3
NP_004121.2	2992	GYG1	603942	GYG1, GSD15	Glycogenin 1	3
NP_004123.1	3026	HABP2	603924	HABP2, PHBP, HGFAL, FSAP, NMTC5	Hyaluronan-binding protein 2	3
NP_004125.3	3313	HSPA9	600548	HSPA9, HSPA9B, MOT2, GRP75, EVPLS, SIDBA4	Heat-shock 70kD protein-9 (mortalin)	3
NP_004127.1	3658	IREB2	147582	IREB2, NDCAMA	Iron-responsive element-binding protein-2	3
NP_004128.1	3779	KCNMB1	603951	KCNMB1	Potassium large conductance calcium-activated channel, subfamily M, beta member 1	3
NP_004136.2	4650	MYO9B	602129	MYO9B, MYR5, CELIAC4	Myosin IXB	3
NP_004165.2	6550	SLC9A3	182307	SLC9A3, NHE3, DIAR8	Solute carrier family 9 (sodium/hydrogen exchanger), member 3	3
NP_004172.2	7345	UCHL1	191342	UCHL1, PARK5, SPG79, NDGOA	Ubiquitin C-terminal esterase L1	3
NP_004178.2	8242	KDM5C	314690	KDM5C, JARID1C, SMCX, DXS1272E, XE169, MRXSCJ	Lysine-specific demethylase 5C (Jumonji, AT-rich interactive domain 1C)	3
NP_004199.1	9131	AIFM1	300169	AIFM1, PDCD8, AIF, COXPD6, COWCK, CMTX4, DFNX5, SEMDHL	Apoptosis-inducing factor, mitochondrion-associated, 1	3
NP_004202.3	9152	SLC6A5	604159	SLC6A5, GLYT2, HKPX3	Solute carrier family 6 (neurotransmitter transporter, glycine), member 5	3
NP_004209.2	9230	RAB11B	604198	RAB11B, NDAGSCW	Ras-associated protein RAB11B	3
NP_004221.3	9294	S1PR2	605111	S1PR2, EDG5, DFNB68	Sphingosine-1-phosphate receptor 2	3
NP_004228.1	9319	TRIP13	604507	TRIP13, 16E1BP, MVA3	Thyroid hormone receptor interactor 13	3
NP_004230.2	9321	TRIP11	604505	TRIP11, TRIP230, CEV14, ACG1A, ODCD	Thyroid hormone receptor interactor 11	3
NP_004243.1	9368	SLC9A3R1	604990	SLC9A3R1, EBP50, NHERF1, NPHLOP2	Solute carrier family 9 (sodium/hydrogen exchanger), member 3 regulatory factor 1	3
NP_004259.3	9440	MED17	603810	MED17, CRSP6, CRSP77, TRAP80, DRIP80	Mediator complex subunit 17	3
NP_004264.2	9469	CHST3	603799	CHST3, C6ST, C6ST1, HSD	Carbohydrate sulfotransferase 3	3
NP_004272.2	9531	BAG3	603883	BAG3, MFM6	BCL2-associated athanogene 3	3
NP_004282.1	9607	CARTPT	602606	CARTPT, CART	Cocaine- and amphetamine-regulated transcript prepropeptide	3
NP_004290.2	22	ABCB7	300135	ABCB7, ABC7, ASAT	ATP-binding cassette-7	3
NP_004295.2	238	ALK	105590	ALK, NBLST3	Anaplastic lymphoma kinase (Ki-1)	3
NP_004302.1	403	ARL3	604695	ARL3, ARFL3, JBTS35, RP83	ADP-ribosylation factor-like 3	3
NP_004306.3	427	ASAH1	613468	ASAH1, AC, SMAPME	N-acylsphingosine amidohydrolase (acid ceramidase) 1	3
NP_004307.2	429	ASCL1	100790	ASCL1, ASH1	Achaete-scute family bHLH transcription factor 1	3
NP_004327.1	699	BUB1	602452	BUB1	BUB1 mitotic checkpoint serine/threonine kinase	3
NP_004332.2	790	CAD	114010	CAD, CDG1Z, EIEE50	CAD trifunctional protein of pyrimidine biosynthesis	3
NP_004334.1	811	CALR	109091	CALR, SSA	Sicca syndrome antigen A (autoantigen Ro; calreticulin)	3
NP_004347.1	975	CD81	186845	CD81, TAPA1, CVID6	CD81 antigen (target of antiproliferative antibody-1)	3
NP_004351.1	999	CDH1	192090	CDH1, UVO, LCAM, ECAD, BCDS1	Cadherin-1 (E-cadherin; uvomorulin)	3
NP_004357.3	1181	CLCN2	600570	CLCN2, EGMA, ECA2, EGI11, EJM8, LKPAT, HALD2	Chloride channel-2	3
NP_004360.2	1293	COL6A3	120250	COL6A3, DYT27, BTHLM1, UCMD1	Collagen VI, alpha-3 polypeptide	3
NP_004364.2	1337	COX6A1	602072	COX6A1, CMTRID	Cytochrome c oxidase, subunit VIa, polypeptide-1	3
NP_004371.2	1387	CREBBP	600140	CREBBP, CBP, RSTS1, MKHK1	CREB binding protein	3
NP_004376.2	1462	VCAN	118661	VCAN, CSPG2, WGN, WGN1, ERVR	Versican (chondroitin sulfate proteoglycan-2)	3
NP_004378.1	1482	NKX2-5	600584	NKX2-5, NKX2E, CSX, CHNG5, VSD3, HLHS2	NK2 homeobox-5 gene	3
NP_004406.2	1832	DSP	125647	DSP, KPPS2, PPKS2, DCWHKTA	Desmoplakin	3
NP_004420.1	1947	EFNB1	300035	EFNB1, EPLG2, CFNS, CFND	eph-related receptor tyrosine kinase ligand 2 (ephrin B1)	3
NP_004422.2	1969	EPHA2	176946	EPHA2, ECK, CTPP1, CTPA, ARCC2, CTRCT6	Ephrin receptor EphA2	3
NP_004437.2	2058	EPRS	138295	EPRS, PARS, HLD15	Glutamyl-prolyl-tRNA synthetase	3
NP_004444.2	2110	ETFDH	231675	ETFDH, MADD	Electron transfer flavoprotein:ubiquinone oxidoreductase	3
NP_004454.2	2245	FGD1	300546	FGD1, FGDY, AAS, MRXS16	FYVE, RhoGEF, and PH domain-containing protein 1	3
NP_004455.2	2250	FGF5	165190	FGF5, TCMGLY	Fibroblast growth factor-5	3
NP_004464.2	2304	FOXE1	602617	FOXE1, FKHL15, TITF2, TTF2, NMTC4	Forkhead box E1 (thyroid transcription factor-2)	3
NP_004484.1	3028	HSD17B10	300256	HSD17B10, HADH2, ERAB, MRXS10, HSD10MD	17-beta-hydroxysteroid dehydrogenase X	3
NP_004510.1	3786	KCNQ3	602232	KCNQ3, EBN2, BFNC2	Potassium voltage-gated channel, KQT-like subfamily, member 3	3
NP_004513.1	3800	KIF5C	604593	KIF5C, NKHC2, CDCBM2	Kinesin family member 5C	3
NP_004514.2	3832	KIF11	148760	KIF11, KNSL1, MCLMR	Kinesin family member 11	3
NP_004516.2	4036	LRP2	600073	LRP2, DBS	Low density lipoprotein-related protein 2	3
NP_004517.2	4171	MCM2	116945	MCM2, CDCL1, DFNA70	Minichromosome maintenance deficient, S. cerevisiae, 2, homolog of (mitotin)	3
NP_004518.1	4222	MEOX1	600147	MEOX1, MOX1, KFS2	Mesenchyme homeo box 1 (Mox1, mouse, homolog of)	3
NP_004521.1	4313	MMP2	120360	MMP2, CLG4A, MONA	Matrix metalloproteinase 2 (gelatinase A, 72kD type IV collagenase)	3
NP_004522.1	4338	MOCS2	603708	MOCS2, MPTS, MOCODB	Molybdenum cofactor synthesis-2	3
NP_004532.1	4694	NDUFA1	300078	NDUFA1, MWFE, MC1DN12	NADH-ubiquinone oxidoreductase subunit A1	3
NP_004541.1	4720	NDUFS2	602985	NDUFS2, MC1DN6	NADH-ubiquinone oxidoreductase core subunit S2	3
NP_004542.1	4722	NDUFS3	603846	NDUFS3, MC1DN8	NADH-ubiquinone oxidoreductase core subunit S3	3
NP_004544.1	4726	NDUFS6	603848	NDUFS6, MC1DN9	NADH-ubiquinone oxidoreductase subunit S6	3
NP_004551.2	4920	ROR2	602337	ROR2, BDB1, BDB, NTRKR2	Receptor tyrosine kinase-like orphan receptor 2	3
NP_004563.2	5318	PKP2	602861	PKP2, ARVD9	Plakophilin-2	3
NP_004579.1	6327	SCN2B	601327	SCN2B, ATFB14	Sodium channel, voltage-gated, type II, beta polypeptide	3
NP_004580.1	6341	SCO1	603644	SCO1, SCOD1	SCO cytochrome c oxidase assembly protein 1	3
NP_004599.2	6911	TBX6	602427	TBX6, SCDO5	T-box 6	3
NP_004605.4	7084	TK2	188250	TK2, MTDPS2, PEOB3	Thymidine kinase, mitochondrial	3
NP_004606.2	7102	TSPAN7	300096	TSPAN7, TM4SF2, MXS1, A15, MRX58	Tetraspanin 7	3
NP_004609.1	7156	TOP3A	601243	TOP3A, MGRISCE2, PEOB5	Topoisomerase (DNA) III, alpha	3
NP_004612.2	7225	TRPC6	603652	TRPC6, TRP6, FSGS2	Transient receptor potential channel-6	3
NP_004616.2	7476	WNT7A	601570	WNT7A	Wingless-type MMTV integration site family, member 7A	3
NP_004619.3	7508	XPC	613208	XPC, XPCC	XPC gene	3
NP_004620.1	2189	FANCG	602956	XRCC9, FANCG	X-ray repair, complementing defective, in Chinese hamster, 9	3
NP_004628.4	7879	RAB7A	602298	RAB7, CMT2B, PSN	Ras-associated protein RAB7	3
NP_004634.1	8106	PABPN1	602279	PABPN1, PABP2, PAB2	Poly(A)-binding protein, nuclear 1	3
NP_004637.1	4868	NPHS1	602716	NPHS1, NPHN	Nephrin	3
NP_004657.2	8876	VNN1	603570	VNN1, HDLCQ8	Vanin 1	3
NP_004658.3	8924	HERC2	605837	HERC2, SHEP1, MRT38	HECT domain and RCC1-like domain 2	3
NP_004684.2	9119	KRT75	609025	KRT75, K6HF, PFB	Keratin 75	3
NP_004688.2	9128	PRPF4	607795	PRPF4, PRP4, HPRP4, RP70	Pre-mRNA processing factor 4	3
NP_004689.1	9129	PRPF3	607301	PRPF3, HPRP3, RP18	Pre-mRNA processing factor 3	3
NP_004691.2	9132	KCNQ4	603537	KCNQ4, DFNA2A	Potassium voltage-gated channel, KQT-like subfamily, member 4	3
NP_004705.1	9149	DYRK1B	604556	DYRK1B, MIRK, AOMS3	Dual-specificity tyrosine phosphorylation-regulated kinase 1B	3
NP_004706.3	9150	CTDP1	604927	CTDP1, FCP1, CCFDN	C-terminal domain of RNA polymerase II subunit A, phosphatase of, subunit 1	3
NP_004724.1	9197	SLC33A1	603690	SLC33A1, ACATN, AT1, SPG42, CCHLND	Solute carrier family 33 (acetyl-CoA transporter), member 1	3
NP_004727.2	9213	XPR1	605237	XPR1, SYG1, IBGC6	Xenotropic and polytropic retrovirus receptor	3
NP_004728.1	9215	LARGE1	603590	LARGE, KIAA0609, MDC1D, MDDGA6, MDDGB6	Acetylglucosaminyltransferase-like protein	3
NP_004729.1	9217	VAPB	605704	VAPB, VAPC, ALS8	Vesicle-associated membrane protein-associated protein B	3
NP_004735.2	9227	LRAT	604863	LRAT, LCA14	Lecithin retinol acyltransferase	3
NP_004743.1	9247	GCM2	603716	GCM2, GCMB, HRPT4	Glial cells missing transcription factor 2	3
NP_004757.1	9276	COPB2	606990	COPB2, MCPH19	Coatomer protein complex, subunit beta-2	3
NP_004762.2	9313	MMP20	604629	MMP20, AI2A2	Matrix metalloproteinase-20 (enamelysin)	3
NP_004764.1	9326	ZNHIT3	604500	ZNHIT3, TRIP3, PEHO	Zinc finger HIT domain-containing protein 3	3
NP_004773.1	9342	SNAP29	604202	SNAP29, CEDNIK	Synaptosomal-associated protein, 29kD	3
NP_004784.2	9361	LONP1	605490	LONP1, PRSS15, LON, CODASS	lon peptidase 1, mitochondrial	3
NP_004786.2	9365	KL	604824	KL, KLOTHO, HFTC3	Klotho	3
NP_004788.1	9370	ADIPOQ	605441	ADIPOQ, APM1, GBP28, ADIPQTL1	Adipocyte-, C1q-, and collagen domain-containing	3
NP_004798.3	9394	HS6ST1	604846	HS6ST1, HS6ST, HH15	Heparan sulfate 6-O-sulfotransferase 1	3
NP_004817.2	9427	ECEL1	605896	ECEL1, XCE, DA5D	Endothelin-converting enzyme-like 1	3
NP_004826.5	185	AGTR1	106165	AGTR1, AGTR1A, AT2R1	Angiotensin receptor 1	3
NP_004827.4	9451	EIF2AK3	604032	EIF2AK3, PEK, PERK, WRS	Eukaryotic translation initiation factor 2-alpha kinase 3	3
NP_004846.4	9488	PIGB	604122	PIGB, EIEE80	Phosphatidylinositol glycan, class B	3
NP_004854.1	9517	SPTLC2	605713	SPTLC2, KIAA0526, SPT2, LCB2, HSN1C, NSAN1C	Serine palmitoyltransferase, long-chain base subunit 2	3
NP_004886.3	114548	NLRP3	606416	NLRP3, CIAS1, FCU, FCAS1, NALP3, PYPAF1, DFNA34, KEFH	NLR family, pyrin domain containing 3	3
NP_004888.2	9562	MINPP1	605391	MINPP1, HIPER1	Multiple inositol polyphosphate phosphatase 1	3
NP_004908.4	9622	KLK4	603767	KLK4, EMSP1, PRSS17, AI2A1	Kallikrein-related peptidase 4	3
NP_004916.1	360	AQP3	600170	AQP3	Aquaporin-3	3
NP_004924.1	1013	CDH15	114019	CDH15, CDH14, CDH3, MRD3	Cadherin-15, M-cadherin (myotubule)	3
NP_004926.1	1020	CDK5	123831	CDK5, LIS7	Cyclin-dependent kinase 5	3
NP_004935.1	1776	DNASE1L3	602244	DNASE1L3, SLEB16	Deoxyribonuclease I-like 3	3
NP_004937.1	1794	DOCK2	603122	DOCK2, IMD40	Dedicator of cytokinesis 2	3
NP_004950.2	2516	NR5A1	184757	NR5A1, FTZF1, FTZ1, SF1, AD4BP, POF7, SRXY3, SPGF8, SRXX4	Nuclear receptor subfamily 5, group A, member 1	3
NP_004951.1	2521	FUS	137070	FUS, TLS, ALS6, ETM4	Fusion, derived from 12-16 translocation, malignant liposarcoma	3
NP_004954.2	2984	GUCY2C	601330	GUCY2C, GUC2C, DIAR6, MECIL	Guanylate cyclase 2C (heat stable enterotoxin receptor)	3
NP_004963.1	3717	JAK2	147796	JAK2, THCYT3	Janus kinase 2 (a protein-tyrosine kinase)	3
NP_004965.1	3737	KCNA2	176262	KCNA2, EIEE32	Potassium channel, voltage-gated, Shaker-related subfamily, member 2	3
NP_004968.2	3748	KCNC3	176264	KCNC3, SCA13	Potassium voltage-gated channel, Shaw-related subfamily, member 3	3
NP_004975.2	3798	KIF5A	602821	KIF5A, NKHC, SPG10, NEIMY, ALS25	Kinesin family member 5A	3
NP_004981.2	4141	MARS	156560	MARS1, MARS, MTRNS, METRS, ILLD, CMT2U	Methioninyl-tRNA synthetase 1	3
NP_004984.2	4287	ATXN3	607047	ATXN3, MJD, SCA3	Ataxin-3 (josephin)	3
NP_004985.2	4318	MMP9	120361	MMP9, CLG4B, MANDP2	Matrix metalloproteinase 9 (gelatinase B, 92kD type IV collagenase)	3
NP_004986.1	4323	MMP14	600754	MMP14, WNCHRS	Matrix metalloproteinase 14 (membrane-inserted)	3
NP_004989.2	4643	MYO1E	601479	MYO1E, MYO1C, FSGS6	Myosin IE	3
NP_004993.1	4704	NDUFA9	603834	NDUFA9, MC1DN26	NADH-ubiquinone oxidoreductase subunit A9	3
NP_004995.1	4714	NDUFB8	602140	NDUFB8, MC1DN32	NADH-ubiquinone oxidoreductase subunit B8	3
NP_004996.1	4715	NDUFB9	601445	NDUFB9, UQOR22, MC1DN24	NADH-ubiquinone oxidoreductase subunit B9	3
NP_004998.3	4795	NFKBIL1	601022	NFKBIL1	Nuclear factor of kappa light polypeptide gene enhancer in B-cells inhibitor-like 1	3
NP_005003.2	4919	ROR1	602336	ROR1, NTRKR1	Receptor tyrosine kinase-like orphan receptor 1	3
NP_005008.2	5130	PCYT1A	123695	PCYT1A, CTPCT, PCYT1, SMDCRD	Phosphate cytidylyltransferase 1, choline, alpha isoform	3
NP_005009.2	5133	PDCD1	600244	PDCD1, SLEB2	Programmed cell death 1	3
NP_005018.1	5296	PIK3R2	603157	PIK3R2, MPPH1	Phosphatidylinositol 3-kinase, regulatory subunit 2	3
NP_005020.1	5309	PITX3	602669	PITX3, CTPP4, CTRCT11, ASGD1	Paired-like homeodomain transcription factor-3	3
NP_005036.2	5649	RELN	600514	RELN, RL, LIS2, ETL7	Reelin	3
NP_005041.1	5826	ABCD4	603214	ABCD4, PXMP1L, P79R, PMP69, MAHCJ	ATP-binding cassette, subfamily D, member 4 (peroxisomal membrane protein 1-like)	3
NP_005042.1	5859	QARS	603727	QARS1, QARS, GLNRS, MSCCA	Glutaminyl-tRNA synthetase 1	3
NP_005043.1	5881	RAC3	602050	RAC3	Rac family small GTPase 3	3
NP_005076.3	8021	NUP214	114350	NUP214, D9S46E, CAN, CAIN, IIAE9	Nucleoporin, 214kD	3
NP_005088.1	9211	LGI1	604619	LGI1, EPT, ETL1, ADLTE, ADPEAF	Leucine-rich gene, glioma-inactivated, 1	3
NP_005092.1	9636	ISG15	147571	ISG15, G1P2, IFI15, IMD38	ISG15 ubiquitin-like modifier	3
NP_005096.1	9939	RBM8A	605313	RBM8A, RBM8B, TAR, C1DELq21.1, DEL1q21.1	RNA-binding motif protein 8A	3
NP_005111.2	9968	MED12	300188	MED12, TNRC11, TRAP230, HOPA, KIAA0192, OKS, FGS1, OHDOX	Mediator of RNA polymerase II transcription, subunit 12, S. cerevisiae, homolog of	3
NP_005112.2	9969	MED13	603808	MED13, THRAP1, TRAP240, MRD61	Mediator complex subunit 13	3
NP_005132.2	2244	FGB	134830	FGB	Fibrinogen, beta polypeptide	3
NP_005133.2	2694	GIF	609342	GIF, IF	Gastric intrinsic factor	3
NP_005134.1	3240	HP	140100	HP	Haptoglobin	3
NP_005139.1	9094	UNC119	604011	UNC119, HRG4, IMD13	unc-119 lipid binding chaperone	3
NP_005140.1	9095	TBX19	604614	TBX19	T-box 19	3
NP_005150.1	70	ACTC1	102540	ACTC1, CMD1R, CMH11, ASD5, LVNC4	Actin, alpha, cardiac muscle	3
NP_005154.2	207	AKT1	164730	AKT1, CWS6	AKT serine/threonine kinase 1	3
NP_005160.2	401	PHOX2A	602753	PHOX2A, ARIX, CFEOM2	Paired-like homeobox 2a	3
NP_005174.2	778	CACNA1F	300110	CACNA1F, CSNB2, CORDX3, CSNB2A, AIED, OA2	Calcium channel, voltage-dependent, alpha-1F subunit	3
NP_005179.2	867	CBL	165360	CBL, CBL2, NSLL	CBL protooncogene	3
NP_005189.2	1120	CHKB	612395	CHKB, CHKL, CKEKB, EKB, MDCMC	Choline kinase, beta	3
NP_005190.4	1146	CHRNG	100730	CHRNG, ACHRG	Cholinergic receptor, nicotinic, gamma polypeptide	3
NP_005196.1	1339	COX6A2	602009	COX6A2	Cytochrome c oxidase, subunit 6A2	3
NP_005204.1	1475	CSTA	184600	CSTA, STFA, STF1, AREI, PSS4	Cystatin A (stefin A)	3
NP_005205.2	1493	CTLA4	123890	CTLA4, IDDM12, CELIAC3, ALPS5	Cytotoxic T-lymphocyte-associated serine esterase-4	3
NP_005206.2	1630	DCC	120470	DCC, MRMV1, HGPPS2	Deleted in colorectal carcinoma	3
NP_005207.2	1650	DDOST	602202	DDOST, OST, OST48, CDG1R	Dolichyl-diphosphooligosaccharide-protein glycosyltransferase	3
NP_005211.1	1747	DLX3	600525	DLX3, TDO, AI4	Distal-less homeo box-3	3
NP_005212.1	1749	DLX5	600028	DLX5, SHFM1D	Distal-less homeo box-5	3
NP_005219.2	1956	EGFR	131550	EGFR, NISBD2	Epidermal growth factor receptor	3
NP_005238.1	2248	FGF3	164950	FGF3, INT2	Fibroblast growth factor-3 (oncogene INT2)	3
NP_005240.3	2290	FOXG1	164874	FOXG1, FOXG1B, FKHL1, FKH2, QIN, BF1	Forkhead box G1B	3
NP_005242.1	2303	FOXC2	602402	FOXC2, FKHL14, MFH1	Forkhead box C2	3
NP_005248.2	2627	GATA6	601656	GATA6, AVSD5, ASD9, PACHD	GATA-binding protein-6	3
NP_005250.1	2660	MSTN	601788	GDF8, MSTN, MSLHP	Growth differentiation factor-8 (myostatin)	3
NP_005253.3	2671	GFER	600924	GFER, ERV1, ALR	Growth factor, erv1, S. cerevisiae, homolog of (augmenter of liver regeneration)	3
NP_005257.2	2702	GJA5	121013	GJA5, CX40, ATFB11	Gap junction protein, alpha-5, 40kD (connexin 40)	3
NP_005258.2	2703	GJA8	600897	GJA8, CX50, CTRCT1, CZP1, CAE1	Gap junction membrane channel protein alpha-8 (connexin 50)	3
NP_005262.1	2746	GLUD1	138130	GLUD1	Glutamate dehydrogenase-1	3
NP_005263.1	2780	GNAT2	139340	GNAT2, ACHM4	Guanine nucleotide-binding protein (G-protein), alpha-transducing (transducin) activity polypeptide-2	3
NP_005267.2	2819	GPD1	138420	GPD1, HTGTI	Glycerol-3-phosphate dehydrogenase, soluble	3
NP_005312.1	3008	HIST1H1E	142220	HIST1H1E, H1F4, RMNS	Histone 1, H1e	3
NP_005331.1	3094	HINT1	601314	HINT1, PRKCNH1, NMAN	Histidine triad nucleotide-binding protein 1 (protein kinase C inhibitor 1)	3
NP_005348.2	3991	LIPE	151750	LIPE, LHS, FPLD6	Lipase E, hormone-sensitive	3
NP_005350.1	4089	SMAD4	600993	SMAD4, MADH4, DPC4, JIP, MYHRS	SMAD family member 4	3
NP_005351.2	4094	MAF	177075	MAF, CCA4, CTRCT21, AYGRP	v-Maf avian musculoaponeurotic fibrosarcoma oncogene homolog	3
NP_005369.2	4613	MYCN	164840	MYCN, NMYC, ODED, MODED	Oncogene NMYC	3
NP_005404.1	6496	SIX3	603714	SIX3, HPE2	SIX homeobox 3	3
NP_005412.1	6887	TAL2	186855	TAL2	T-cell acute lymphocytic leukemia-2	3
NP_005413.2	7007	TECTA	602574	TECTA, DFNA8, DFNA12, DFNB21	Tectorin, alpha	3
NP_005420.1	7424	VEGFC	601528	VEGFC, VRP, LMPHM4	Vascular endothelial growth factor C	3
NP_005421.1	7471	WNT1	164820	WNT1, INT1, OI15, BMND16	Wingless-type MMTV integration site family, member 1 (oncogene INT1)	3
NP_005422.1	7516	XRCC2	600375	XRCC2, FANCU	X-ray repair, complementing defective, repair in Chinese hamster cells-2	3
NP_005436.1	9126	SMC3	606062	SMC3, CSPG6, HCAP, BAM, CDLS3	Structural maintenance of chromosomes 3	3
NP_005439.2	9210	BMP15	300247	BMP15, GDF9B, ODG2, POF4	Bone morphogenetic protein 15	3
NP_005441.1	9241	NOG	602991	NOG, SYM1, SYNS1A	Noggin, mouse, homolog of	3
NP_005447.1	9479	MAPK8IP1	604641	MAPK8IP1, IB1	Mitogen-activated protein kinase 8-interacting protein 1	3
NP_005449.5	9568	GABBR2	607340	GABBR2, GPR51, EIEE59, NDPLHS	Gamma-aminobutyric acid B receptor 2	3
NP_005452.2	9935	MAFB	608968	MAFB, KRML, MCTO, DURS3	v-MAF musculoaponeurotic fibrosarcoma oncogene family, protein B	3
NP_005456.1	10000	AKT3	611223	AKT3, PKBG, MPPH2	AKT serine/threonine kinase 3	3
NP_005468.1	10021	HCN4	605206	HCN4, SSS2	Hyperpolarization-activated cyclic nucleotide-gated potassium channel 4	3
NP_005496.4	949	SCARB1	601040	SCARB1, CD36L1, CLA1, HDLQTL6	Scavenger receptor class B, member 1 (CD36 antigen-like 1)	3
NP_005497.1	950	SCARB2	602257	SCARB2, CD36L2, LIMPII, AMRF, EPM4	Scavenger receptor class B, member 2	3
NP_005505.2	3106	HLA-B	142830	HLA-B, SPDA1	Major histocompatibility complex, class I, B	3
NP_005506.3	3110	MNX1	142994	MNX1, HLXB9, HOXHB9, SCRA1	Motor neuron and pancreas homeobox 1	3
NP_005509.1	3158	HMGCS2	600234	HMGCS2	3-hydroxy-3-methylglutaryl-Coenzyme A synthase 2, mitochondrial	3
NP_005513.1	3198	HOXA1	142955	HOXA1, HOX1F, BSAS	Homeo box-A1	3
NP_005514.1	3207	HOXA11	142958	HOXA11, HOX1I, RUSAT1	Homeo box-A11	3
NP_005516.1	3290	HSD11B1	600713	HSD11B1, HSD11, HSD11L, CORTRD2	Hydroxysteroid, 11-beta, dehydrogenase 1	3
NP_005528.4	3621	ING1	601566	ING1	Inhibitor of growth 1	3
NP_005535.1	3667	IRS1	147545	IRS1	Insulin receptor substrate-1	3
NP_005537.3	3702	ITK	186973	ITK, EMT, LPFS1	T-cell-specific tyrosine kinase; homolog of mouse T-cell itk/tsk tyrosine kinase	3
NP_005545.1	3853	KRT6A	148041	KRT6A, PC3	Keratin 6A	3
NP_005546.2	3854	KRT6B	148042	KRT6B, PC4	Keratin 6B	3
NP_005548.2	3868	KRT16	148067	KRT16, FNEPPK, PC1	Keratin 16	3
NP_005553.2	3918	LAMC2	150292	LAMC2, LAMNB2, LAMB2T	Laminin, gamma-2 (nicein, 100kD; kalinin, 105kD; BM600, 100kD)	3
NP_005561.1	3998	LMAN1	601567	LMAN1, ERGIC53, F5F8D, MCFD1	Lectin, mannose-binding, 1	3
NP_005564.1	4001	LMNB1	150340	LMNB1, ADLD	Lamin B1	3
NP_005567.2	4016	LOXL1	153456	LOXL1, LOXL	Lysyl oxidase-like 1	3
NP_005568.2	4018	LPA	152200	LPA	Apolipoprotein Lp(a)	3
NP_005572.2	4059	BCAM	612773	LU, AU, BCAM	B-cell adhesion molecule	3
NP_005575.1	4081	MAB21L1	601280	MAB21L1, COFG	mab-21 like 1	3
NP_005576.3	4091	SMAD6	602931	SMAD6, MADH6, AOVD2	SMAD family member 6	3
NP_005580.1	4329	ALDH6A1	603178	ALDH6A1, MMSDH	Aldehyde dehydrogenase 6 family, member A1 (methylmalonate semialdehyde dehydrogenase)	3
NP_005582.1	4361	MRE11	600814	MRE11A, MRE11, ATLD	MRE11 homolog, double-strand break repair nuclease	3
NP_005584.2	4617	MYF5	159990	MYF5, EORVA	Myogenic factor-5	3
NP_005594.1	5205	ATP8B1	602397	ATP8B1, FIC1, BRIC, PFIC1, ICP1	ATPase, class I, type 8B, member 1	3
NP_005600.1	5837	PYGM	608455	PYGM	Phosphorylase, glycogen, muscle	3
NP_005608.1	6208	RPS14	130620	RPS14, EMTB	Ribosomal protein S14	3
NP_005609.3	28514	DLL1	606582	DLL1, DELTA1, NEDBAS	Delta-like canonical Notch ligand 1	3
NP_005610.1	6253	RTN2	603183	RTN2, NSPL1, SPG12	Reticulon-2	3
NP_005620.1	6535	SLC6A8	300036	SLC6A8, CRTR, CCDS1	Solute carrier family 6 (neurotransmitter transporter, creatine), member 8	3
NP_005621.2	6578	SLCO2A1	601460	SLCO2A1, OATP2A1, PGT, SLC21A2, PHOAR2	Solute carrier organic anion transporter family, member 2A1	3
NP_005622.1	6608	SMO	601500	SMOH, SMO, CRJS	Smoothened, frizzled class receptor	3
NP_005624.2	6654	SOS1	182530	SOS1, GINGF, GF1, HGF, NS4	SOS Ras/Rac guanine nucleotide exchange factor 1	3
NP_005625.2	6658	SOX3	313430	SOX3, MRGH	SRY (sex determining region Y)-box 3	3
NP_005636.1	6884	TAF13	600774	TAF13, TAF2K, MRT60	TAF13 RNA polymerase II, TATA box-binding protein-associated factor, 18kD	3
NP_005641.1	6942	TCF20	603107	TCF20, SPBP, AR1, DDVIBA	Transcription factor 20	3
NP_005642.1	6999	TDO2	191070	TDO2, TPH2, TRPO, HYPTRP	Tryptophan oxygenase	3
NP_005645.1	7025	NR2F1	132890	NR2F1, TFCOUP1, ERBAL3, EAR3, BBSOAS	Nuclear receptor subfamily 2, group F, member 1 (transcription factor COUP 1)	3
NP_005655.1	7681	MKRN3	603856	MKRN3, ZFP127, ZNF127, CPPB2	Makorin 3	3
NP_005661.1	7957	EPM2A	607566	EPM2A, MELF, EPM2	EPM2A glucan phosphatase, laforin	3
NP_005668.2	8292	COLQ	603033	COLQ, EAD, CMS5	Collagenic tail of endplate acetylcholinesterase	3
NP_005678.3	10056	FARSB	609690	FARSLB, FRSB, RILDBC	Phenylalanine-tRNA synthetase-like, beta subunit	3
NP_005680.1	10058	ABCB6	605452	ABCB6, MTABC3, MCOPCB7, LAN, DUH3, PSHK2	ATP-binding cassette, subfamily B, member 6	3
NP_005690.2	10068	IL18BP	604113	IL18BP, FVH	Interleukin 18-binding protein	3
NP_005693.1	26284	ERAL1	607435	ERAL1, ERAL1A, ERAL1B, PRLTS6	ERA G-protein-like 1	3
NP_005699.1	10082	GPC6	604404	GPC6, OMIMD1	Glypican 6	3
NP_005723.2	10111	RAD50	604040	RAD50, NBSLD	RAD50 double strand break repair protein	3
NP_005730.2	10125	RASGRP1	603962	RASGRP1, IMD64	Ras guanyl nucleotide releasing protein-1	3
NP_005731.1	10126	DNAL4	610565	DNAL4, MRMV3	Dynein, axonemal, light chain 4	3
NP_005756.2	10159	ATP6AP2	300556	ATP6AP2, ATP6M8-9, XMRE, MRXSH, XPDS	ATPase, H+ transporting, lysosomal, accessory protein 2	3
NP_005778.1	10195	ALG3	608750	ALG3, NOT56L, CDGS4, CDG1D	ALG3 alpha-1,3-mannosyltransferase	3
NP_005788.1	10205	MPZL2	604873	MPZL2, EVA1, EVA, DFNB111	Myelin protein zero-like 2	3
NP_005793.2	10210	TOPORS	609507	TOPORS, P53BP3, LUN, RP31	Topoisomerase I-binding arginine/serine-rich protein	3
NP_005798.3	10216	PRG4	604283	PRG4, CACP, MSF, SZP, HAPO	Proteoglycan 4 (megakaryocyte stimulating factor; hemangiopoietin)	3
NP_005841.1	10262	SF3B4	605593	SF3B4, SF3B49, SAP49, AFD1	Splicing factor 3B, subunit 4	3
NP_005844.4	10265	IRX5	606195	IRX5, HMMS	Iroquois homeo box protein 5	3
NP_005848.2	10269	ZMPSTE24	606480	ZMPSTE24, FACE1, STE24, MADB	Zinc metalloproteinase STE24	3
NP_005850.1	5813	PURA	600473	PURA, PUR1, MRD31	Purine-rich element binding protein A	3
NP_005852.2	10273	STUB1	607207	STUB1, CHIP, SCAR16, SCA48	STIP1 homologous and U box-containing protein 1	3
NP_005853.2	10274	STAG1	604358	STAG1, MRD47	Stromal antigen 1	3
NP_005857.1	10280	SIGMAR1	601978	SIGMAR1, SRBP, ALS16, DSMA2	Sigma nonopioid intracellular receptor 1	3
NP_005860.2	10283	CWC27	617170	CWC27, SDCCAG10, RPSKA	CWC27 spliceosome-associated cyclophilin	3
NP_005870.2	10293	TRAIP	605958	TRAIP, TRIP, RNF206, SCKL9	TRAF-interacting protein	3
NP_005872.2	10295	BCKDK	614901	BCKDK, BDK, BCKDKD	Branched-chain alpha-keto acid dehydrogenase kinase	3
NP_005876.2	10299	2021-03-06	613297	MARCH6, TEB4, DOA10, KIAA0597, FAME3	Membrane-associated RING-CH finger protein 6	3
NP_005879.1	5250	SLC25A3	600370	SLC25A3, PHC	Solute carrier family 25 (mitochondrial carrier), member 3	3
NP_005887.2	3417	IDH1	147700	IDH1	Isocitrate dehydrogenase, soluble	3
NP_005893.1	4088	SMAD3	603109	SMAD3, MADH3, LDS3	SMAD family member 3	3
NP_005895.1	4092	SMAD7	602932	SMAD7, MADH7, CRCS3	SMAD family member 7	3
NP_005899.3	4126	MANBA	609489	MANBA, MANB1	Mannosidase, beta A, lysosomal	3
NP_005903.2	4160	MC4R	155541	MC4R, BMIQ20	Melanocortin-4 receptor	3
NP_005905.2	4173	MCM4	602638	MCM4, NKGCD, NKCD, IMD54	Minichromosome maintenance deficient, S. cerevisiae, homolog of, 4	3
NP_005906.2	4175	MCM6	601806	MCM6	Minichromosome maintenance deficient (mis5, S. pombe) 6	3
NP_005909.2	4191	MDH2	154100	MDH2, EIEE51	Malate dehydrogenase, mitochondrial	3
NP_005912.1	4214	MAP3K1	600982	MAP3K1, MEKK1, MEKK, SRXY6	Mitogen-activated protein kinase kinase kinase 1	3
NP_005923.2	4285	MIPEP	602241	MIPEP, COXPD31	Mitochondrial intermediate peptidase	3
NP_005947.3	4522	MTHFD1	172460	MTHFD1, MTHFC, CIMAH	Methylenetetrahydrofolate dehydrogenase 1	3
NP_005973.1	6495	SIX1	601205	SIX1, BOS3, DFNA23	SIX homeobox 1	3
NP_005980.1	6718	AKR1D1	604741	AKR1D1, SRD5B1, CBAS2	Bile acid synthesis defect, congenital, 2	3
NP_005984.3	6904	TBCD	604649	TBCD, PEBAT	Tubulin-specific chaperone D	3
NP_005985.3	6909	TBX2	600747	TBX2, VETD	T-box 2	3
NP_005991.1	7277	TUBA4A	191110	TUBA4A, TUBA1, ALS22	Tubulin, alpha-4A	3
NP_005997.2	7704	ZBTB16	176797	ZBTB16, ZNF145, PLZF	Zinc finger- and BTB domain-containing protein 16 (promyelocytic leukemia zinc finger)	3
NP_006000.2	7846	TUBA1A	602529	TUBA1A, TUBA3, LIS3	Tubulin, alpha-1A	3
NP_006003.1	8192	CLPP	601119	CLPP, PRLTS3, DFNB81	ATP-dependent protease ClpAP, E. coli, proteolytic subunit, homolog of	3
NP_006005.2	8270	LAGE3	300060	LAGE3, ITBA2, GAMOS2	L antigen family member 3	3
NP_006006.3	8289	ARID1A	603024	ARID1A, C1orf4, B120, SMARCF1, MRD14, CSS2	AT rich interactive domain 1A, SWI-like	3
NP_006007.2	8763	CD164	603356	CD164, DFNA66	CD164 antigen	3
NP_006054.2	10324	KLHL41	607701	KLHL41, KBTBD10, SARCOSIN, NEM9	Kelch-like family member 41	3
NP_006064.2	10345	TRDN	603283	TRDN, TDN, CPVT5	Triadin	3
NP_006069.1	10369	CACNG2	602911	CACNG2, MRD10	Calcium channel, voltage-dependent, gamma-2 subunit (stargazin)	3
NP_006075.3	10379	IRF9	147574	IRF9, ISGF3, ISGF3G	Interferon regulatory factor 9	3
NP_006077.2	10381	TUBB3	602661	TUBB3, TUBB4, CFEOM3A, CDCBM1	Tubulin, beta-3	3
NP_006079.1	10383	TUBB4B	602660	TUBB4B, TUBB2C, LCAEOD	Tubulin, beta-4B	3
NP_006109.2	10456	HAX1	605998	HAX1, SCN3	HCLS1-associated protein X1	3
NP_006112.3	3848	KRT1	139350	KRT1, EPPK, NEPPK, EHK	Keratin 1	3
NP_006120.1	649	BMP1	112264	BMP1, OI13	Bone morphogenetic protein-1	3
NP_006138.1	3664	IRF6	607199	IRF6, VWS, LPS, PIT, PPS1, OFC6	Interferon regulatory factor 6	3
NP_006149.2	4747	NEFL	162280	NEFL, CMT2E, CMT1F, CMTDIG	Neurofilament, light polypeptide	3
NP_006151.3	4761	NEUROD2	601725	NEUROD2, EIEE72	Neurogenic differentiation 2	3
NP_006155.2	4780	NFE2L2	600492	NFE2L2, NRF2, IMDDHH	Nuclear factor, erythroid-derived 2-like 2	3
NP_006163.1	4878	NPPA	108780	NPPA, PND, ANP, ATFB6, ATRST2	Natriuretic peptide precursor A	3
NP_006171.2	4915	NTRK2	600456	NTRK2, TRKB, OBHD, EIEE58	Neurotrophic tyrosine kinase, receptor, type 2	3
NP_006183.2	5075	PAX1	167411	PAX1, OFC2	Paired box homeotic gene-1	3
NP_006185.1	5083	PAX9	167416	PAX9, STHAG3	Paired box gene 9	3
NP_006195.3	5146	PDE6C	600827	PDE6C, PDEA2, COD4	Phosphodiesterase-6C, cGMP-specific, cone, alpha prime	3
NP_006196.1	5149	PDE6H	601190	PDE6H, RCD3, ACHM6	Phosphodiesterase 6H, cGMP-specific, cone, gamma	3
NP_006198.1	5157	PDGFRL	604584	PDGFRL, PDGRL, PRLTS	Platelet-derived growth factor receptor-like	3
NP_006199.2	5167	ENPP1	173335	ENPP1, PDNP1, NPPS, M6S1, PCA1, ARHR2, COLED	Ectonucleotide pyrophosphatase/phosphodiesterase 1 (Ly-41 antigen, mouse, homolog of)	3
NP_006218.1	5360	PLTP	172425	PLTP, HDLCQ9	Phospholipid transfer protein	3
NP_006227.1	5455	POU3F3	602480	POU3F3, SNIBFIS	POU domain, class 3, transcription factor-3	3
NP_006236.1	5528	PPP2R5D	601646	PPP2R5D, MRD35	Protein phosphatase-2, regulatory subunit B (B56), delta isoform	3
NP_006246.2	5583	PRKCH	605437	PRKCH, PKCL, PRKCL	Protein kinase C, eta	3
NP_006249.1	5592	PRKG1	176894	PRKG1, PRKG1B, PRKGR1B, AAT8	Protein kinase, cGMP-dependent, regulatory, type I	3
NP_006252.3	5626	PROP1	601538	PROP1, CPHD2	Prophet of Pit1, paired-like homeodomain transcription factor	3
NP_006256.1	5885	RAD21	606462	RAD21, SCC1, NXP1, KIAA0078, CDLS4, MGS	RAD21 cohesin complex component	3
NP_006288.2	7515	XRCC1	194360	XRCC1, SCAR26	X-ray-repair, complementing defective, repair in Chinese hamster cells-1	3
NP_006293.2	7841	MOGS	601336	MOGS, GCS1, CDG2B	Mannosyl-oligosaccharide glucosidase	3
NP_006294.2	7965	AIMP2	600859	AIMP2, JTV1, HLD17	Aminoacyl tRNA synthetase complex-interacting multifunctional protein 2	3
NP_006297.2	8243	SMC1A	300040	SMC1A, SMC1L1, SMC1, DXS423E, KIAA0178, CDLS2	Segregation of mitotic chromosomes 1 (SMC1, yeast, homolog of; DXS423E; SB1.8)	3
NP_006299.1	8988	HSPB3	604624	HSPB3, HSPL27, HMN2C, DHMN2C	Heat-shock 27kD protein 3	3
NP_006322.4	10436	EMG1	611531	EMG1, NEP1, C2F, BWCNS	EMG1 N1-specific pseudouridine methyltransferase	3
NP_006334.2	10461	MERTK	604705	MERTK, RP38	Mer tyrosine kinase protooncogene	3
NP_006339.3	10466	COG5	606821	COG5, GOLTC1, GTC90, CDG2I	Component of oligomeric golgi complex 5	3
NP_006352.2	10481	HOXB13	604607	HOXB13, HPC9	Homeo box B13	3
NP_006362.1	10491	CRTAP	605497	CRTAP, CASP, OI7	Cartilage-associated protein	3
NP_006383.2	10528	NOP56	614154	NOP56, SCA36	Nop56, S. cerevisiae, homolog of	3
NP_006388.2	10535	RNASEH2A	606034	RNASEH2A, RNHIA, AGS4	Ribonuclease H2, large subunit	3
NP_006403.2	10555	AGPAT2	603100	AGPAT2, LPAAB, BSCL, BSCL1	1-acylglycerol-3-phosphate O-acyltransferase 2 (lysophosphatidic acid acyltransferase-beta)	3
NP_006407.1	10559	SLC35A1	605634	SLC35A1, CST, CDG2F	Solute carrier family 35 (CMP-sialic acid transporter), member 1	3
NP_006411.2	10564	ARFGEF2	605371	ARFGEF2, BIG2, PVNH2	ADP-ribosylation factor guanine nucleotide-exchange factor 2, brefeldin A-inhibited	3
NP_006415.2	10568	SLC34A2	604217	SLC34A2, PULAM	Solute carrier family 34 (sodium/phosphate cotransporter), member 2	3
NP_006429.2	10584	COLEC10	607620	COLEC10, CLL1, 3MC3	Collectin 10	3
NP_006430.1	10586	MAB21L2	604357	MAB21L2, MCSKS14	mab-21 like 2	3
NP_006431.2	10587	TXNRD2	606448	TXNRD2, TRXR2, SELZ, GCCD5	Thioredoxin reductase 2	3
NP_006432.1	10588	MTHFS	604197	MTHFS, NEDMEHM	5,10-methenyltetrahydrofolate synthetase	3
NP_006436.3	10594	PRPF8	607300	PRPF8, PRPC8, RP13	Pre-mRNA processing factor 8	3
NP_006437.3	10599	SLCO1B1	604843	SLCO1B1, LST1, OATP2, OATPC, OATP1B1, HBLRR	Solute carrier organic anion transporter family, member 1B1	3
NP_006483.2	257	ALX3	606014	ALX3, FND1	Aristaless-like homeobox 3	3
NP_006484.1	1203	CLN5	608102	CLN5	CLN5 gene	3
NP_006485.2	2077	ERF	611888	ERF, PE2, CRS4, CHYTS	ETS2 repressor factor	3
NP_006487.1	2773	GNAI3	139370	GNAI3, ARCND1	Guanine nucleotide-binding protein (G-protein), alpha-inhibiting activity polypeptide-3	3
NP_006489.1	3957	LGALS2	150571	LGALS2	Lectin, galactoside-binding, soluble, 2	3
NP_006493.1	5429	POLH	603968	POLH, XPV	Polymerase, DNA, eta	3
NP_006500.2	5971	RELB	604758	RELB, IREL, IMD53	v-rel avian reticuloendotheliosis viral oncogene homolog B	3
NP_006507.2	6513	SLC2A1	138140	SLC2A1, GLUT1, HTLVR, DYT18, PED, GLUT1DS, EIG12, DYT9, SDCHCN	Solute carrier family 2 (facilitated glucose transporter), member 1	3
NP_006508.2	6567	SLC16A2	300095	SLC16A2, DXS128, XPCT	Solute carrier family 16 (monocarboxylic acid transporters), member 2	3
NP_006512.2	7030	TFE3	314310	TFE3, RCCX1	Transcription factor for IgH enhancer	3
NP_006536.3	10641	NPRL2	607072	NPRL2, NPRL2, FFEVF2	NPR2-like protein, GATOR1 complex subunit	3
NP_006547.1	10654	PMVK	607622	PMVK, PMK, POROK1	Phosphomevalonate kinase	3
NP_006554.1	10661	KLF1	600599	KLF1, EKLF, INLU, HBFQTL6, CDAN4	Kruppel-like factor 1, erythroid	3
NP_006556.1	10664	CTCF	604167	CTCF, MRD21	CCCTC-binding factor	3
NP_006567.3	10677	AVIL	613397	AVIL, NPHS21	Advillin	3
NP_006570.1	10682	EBP	300205	EBP, CDPX2, CPXD, CPX, MEND	Emopamil-binding protein	3
NP_006571.1	10686	CLDN16	603959	CLDN16, PCLN1, HOMG3	Claudin 16 (paracellin 1)	3
NP_006578.2	10699	CORIN	605236	CORIN, CRN, TMPRSS10, ATC2, PEE5	Corin, serine peptidase	3
NP_006584.1	10716	TBR1	604616	TBR1, IDDAS	T-box, brain, 1	3
NP_006585.2	10717	AP4B1	607245	AP4B1, SPG47, CPSQ5	Adaptor-related protein complex 4, beta-1 subunit	3
NP_006601.2	10747	MASP2	605102	MASP2	Mannan-binding lectin serine protease 2	3
NP_006603.2	10749	KIF1C	603060	KIF1C, LTXS1, KIAA0706, SPAX2	Kinesin family member 1C	3
NP_006604.1	10750	GRAP	604330	GRAP, DFNB114	GRB2-related adaptor protein	3
NP_006642.1	10815	CPLX1	605032	CPLX1, CPX1, EIEE63	Complexin 1	3
NP_006649.2	10842	PPP1R17	604088	GSBS	G-substrate	3
NP_006651.2	10845	CLPX	615611	CLPX, EPP2	Caseinolytic mitochondrial matrix peptidase chaperone subunit	3
NP_006653.2	10847	SRCAP	611421	SRCAP, SWR1, KIAA0309, FLHS	SNF2-related CBP activator protein	3
NP_006692.1	10907	TXNL4A	611595	TXNL4A, DIM1, BMKS	Thioredoxin-like 4A	3
NP_006712.2	132	ADK	102750	ADK	Adenosine kinase	3
NP_006720.1	1730	DIAPH2	300108	DIAPH2, DIA, POF2A	diaphanous-related formin 2	3
NP_006726.1	3199	HOXA2	604685	HOXA2, MCOHI	Homeobox A2	3
NP_006727.2	3300	DNAJB2	604139	DNAJB2, HSJ1, HSPF3, DSMA5	DnaJ, E. coli, homolog of, subfamily B, member 2 (heat-shock protein, DNAJ-like 1)	3
NP_006730.2	4174	MCM5	602696	MCM5, CDC46, MGORS8	Minichromosome maintenance, S. cerevisiae, homolog of, 5	3
NP_006746.1	6888	TALDO1	602063	TALDO1	Transaldolase-1	3
NP_006750.3	7360	UGP2	191760	UGP2, UGPP2, EIEE83	Uridyl diphosphate glucose pyrophosphorylase-2	3
NP_006756.2	7991	TUSC3	601385	TUSC3, M33, D8S1992, MRT7, MRT22	Tumor suppressor candidate 3	3
NP_006758.2	8216	LZTR1	600574	LZTR1, SWNTS2, NS10, NS2	Leucine-zipper-like regulator-1	3
NP_006763.2	8831	SYNGAP1	603384	SYNGAP1, MRD5	Synaptic Ras GTPase activating protein 1	3
NP_006776.1	10892	MALT1	604860	MALT1, MLT, IMD12	Mucosa-associated lymphoid tissue lymphoma translocation gene 1	3
NP_006781.1	9499	MYOT	604103	MYOT, TTOD, MFM3	Myotilin (titin immunoglobulin domain protein)	3
NP_006787.2	10939	AFG3L2	604581	AFG3L2, SCA28, SPAX5	ATPase family gene 3-like 2	3
NP_006822.1	10978	CLP1	608757	CLP1, HEAB, PCH10	Cleavage and polyadenylation factor I subunit 1, yeast, homolog of	3
NP_006850.2	11019	LIAS	607031	LIAS, PDHLD, HGCLAS	Lipoic acid synthase	3
NP_006867.1	11041	B4GAT1	605517	B4GAT1, B3GNT1, IGNT, IGAT, MDDGA13	Beta-1,4glucuronyltransferase 1	3
NP_008816.3	463	ZFHX3	104155	ZFHX3, ATBF1	Zinc finger homeobox 3	3
NP_008817.1	514	ATP5F1E	606153	ATP5E, MC5DN3	ATP synthase, H+ transporting, mitochondrial F1 complex, epsilon subunit	3
NP_008822.2	1421	CRYGD	123690	CRYGD, CRYG4, CTRCT4, CACA, CCA3, PCC	Crystallin, gamma D	3
NP_008823.1	1789	DNMT3B	602900	DNMT3B, ICF1	DNA methyltransferase 3B	3
NP_008825.4	2328	FMO3	136132	FMO3, TMAU	Flavin-containing monooxygenase 3	3
NP_008826.1	3176	HNMT	605238	HNMT, MRT51	Histamine N-methyltransferase	3
NP_008835.5	5591	PRKDC	600899	PRKDC, HYRC1, DNPK1, IMD26	Protein kinase, DNA-activated, catalytic polypeptide (hyperradiosensitivity of murine SCID mutation, complementing-1)	3
NP_008845.2	6096	RORB	601972	RORB, RZRB, EIG15	RAR-related orphan receptor B	3
NP_008846.2	6102	RP2	300757	RP2	Retinitis pigmentosa-2, X-linked recessive	3
NP_008849.2	6309	SC5D	602286	SC5DL, ERG3	Sterol C5-desaturase-like	3
NP_008860.4	6499	SKIV2L	600478	SKIV2L, SKI2, SKI2W, THES2	Superkiller viralicidic activity 2, S. cerevisiae, homolog, like	3
NP_008870.2	6655	SOS2	601247	SOS2, NS9	SOS Ras/Rac guanine nucleotide exchange factor 2	3
NP_008872.1	6663	SOX10	602229	SOX10, WS4, WS4C, PCWH	SRY (sex-determining region Y)-box-10	3
NP_008878.3	6731	SRP72	602122	SRP72, BMFS1	Signal recognition particle, 72kD	3
NP_008881.2	6853	SYN1	313440	SYN1	Synapsin I	3
NP_008909.1	7737	RNF113A	300951	RNF113A, ZNF183, TTD5	RING finger protein 113A	3
NP_008913.2	8092	ALX1	601527	ALX1, CART1, FND3	Aristaless-like homeobox 1 (cartilage homeoprotein 1)	3
NP_008927.1	10560	SLC19A2	603941	SLC19A2, THTR1, TRMA, THMD1	Solute carrier family 19 (thiamine transporter), member 2	3
NP_008966.1	11081	KERA	603288	KERA, CNA2	Keratocan	3
NP_008986.2	11128	POLR3A	614258	POLR3A, RPC1, RPC155, ADDH, HLD7, WDRTS	Polymerase III, RNA, subunit A	3
NP_009006.2	11152	WDR45	300526	WDR45, WIPI4, NBIA5	WD repeat-containing protein 45	3
NP_009008.2	11154	AP4S1	607243	AP4S1, CPSQ6, SPG52	Adaptor-related protein complex 4, sigma-1 subunit	3
NP_009034.2	4723	NDUFV1	161015	NDUFV1, UQOR1, MC1DN4	NADH-ubiquinone oxidoreductase core subunit V1	3
NP_009044.2	7062	TCHH	190370	TCHH, THH, THL, TRHY, UHS3	Trichohyalin	3
NP_009049.2	7204	TRIO	601893	TRIO, MRD44	Triple functional domain	3
NP_009053.1	7391	USF1	191523	USF1, HYPLIP1	Upstream transcription factor 1	3
NP_009057.1	7415	VCP	601023	VCP, IBMPFD1, ALS14, CMT2Y	Valosin-containing protein	3
NP_009060.2	7546	ZIC2	603073	ZIC2, HPE5	ZIC family, member 2	3
NP_009075.1	7703	PCGF2	600346	PCGF2, RNF110, ZNF144, MEL18, TPFS	Polycomb group ring finger 2	3
NP_009106.1	11160	ERLIN2	611605	ERLIN2, SPFH2, C8orf2, SPG18	Endoplasmic reticulum lipid raft-associated protein 2	3
NP_009111.2	11181	TREH	275360	TREH, TREHD	Trehalase	3
NP_009130.2	11213	IRAK3	604459	IRAK3, IRAKM, ASRT5	Interleukin 1 receptor-associated kinase 3	3
NP_009133.2	11216	AKAP10	604694	AKAP10	A-kinase anchor protein 10	3
NP_009139.1	11222	MRPL3	607118	MRPL3, MRL3, COXPD9	Mitochondrial ribosomal protein L3	3
NP_009140.1	11224	RPL35	618315	RPL35, DBA19	Ribosomal protein L35	3
NP_009145.1	11231	SEC63	608648	SEC63, PCLD2	SEC63 homolog, protein translocation regulator	3
NP_009146.2	11232	POLG2	604983	POLG2, POLGB, PEOA4, MTDPS16	Polymerase, DNA, gamma-2	3
NP_009149.2	11236	RNF139	603046	RNF139, TRC8, RCA1	RING finger protein 139	3
NP_009167.1	11261	CHP1	606988	CHP1, SPAX9	Calcineurin like EF-hand protein 1	3
NP_009185.2	11284	PNKP	605610	PNKP, PNK, MCSZ, EIEE10, AOA4	Polynucleotide kinase 3' phosphatase	3
NP_009186.1	11285	B4GALT7	604327	B4GALT7, XGALT1, XGPT1, EDSSPD1	Beta-1,4-galactosyltransferase 7	3
NP_009190.2	11311	VPS45	610035	VPS45, VPS45A, SCN5	Vacuolar protein sorting 45 homolog	3
NP_009193.2	11315	PARK7	602533	DJ1, PARK7	Oncogene DJ-1	3
NP_009223.2	51	ACOX1	609751	ACOX1, ACOX, SCOX	Acyl-Coenzyme A oxidase 1, palmitoyl	3
NP_009224.2	720	C4A	120810	C4A, C4S, C4AD	Complement component-4A	3
NP_009231.2	672	BRCA1	113705	BRCA1, PSCP, BROVCA1, PNCA4, FANCS	Breast cancer-1 gene	3
NP_009297.2	25	ABL1	189980	ABL1, CHDSKM	Abelson murine leukemia viral (v-abl) oncogene homolog 1	3
NP_015564.4	2892	GRIA3	305915	GRIA3, GLUR3, MRX94	Glutamate receptor, ionotropic, AMPA 3	3
NP_031373.2	23431	AP4E1	607244	AP4E1, SPG51, CPSQ4, STUT1	Adaptor-related protein complex 4, epsilon-1 subunit	3
NP_031383.1	22796	COG2	606974	COG2, LDLC, CDG2Q	Component of oligomeric golgi complex 2	3
NP_031400.2	4990	SIX6	606326	SIX6, ODRMD	SIX homeobox 6	3
NP_036196.1	4284	MIP	154050	MIP, AQP0, CTRCT15	Major intrinsic protein of lens fiber	3
NP_036205.1	22948	CCT5	610150	CCT5, KIAA0098, CCTE	chaperonin containing TCP1, subunit 5 (epsilon)	3
NP_036211.2	8694	DGAT1	604900	DGAT1, ARGP1, DIAR7	Diacylglycerol O-acyltransferase 1	3
NP_036214.2	23414	ZFPM2	603693	ZFPM2, FOG2, DIH3, SRXY9	Zinc finger protein, multitype 2 (friend of GATA2)	3
NP_036216.2	2747	GLUD2	300144	GLUD2	Glutamate dehydrogenase-2	3
NP_036224.1	29851	ICOS	604558	ICOS, AILIM, CVID1	Inducible costimulator	3
NP_036228.1	26060	APPL1	604299	APPL1, APPL, MODY14	Adaptor protein containing PH domain, PTB domain, and leucine zipper motif 1	3
NP_036238.1	23568	ARL2BP	615407	ARL2BP, BART	ADP ribosylation factor-like 2-binding protein	3
NP_036242.1	26511	CHIC2	604332	CHIC2, BTL	Cysteine-rich hydrophobic domain 2 (Brx-like gene translocated in leukemia)	3
NP_036246.1	23581	CASP14	605848	CASP14, ARCI12	Caspase 14, apoptosis-related cysteine protease	3
NP_036252.1	23607	CD2AP	604241	CD2AP, CMS	CD2-associated protein	3
NP_036292.2	26235	FBXL4	605654	FBXL4, FBL4, MTDPS13	F-box and leucine-rich repeat protein 4	3
NP_036311.3	25793	FBXO7	605648	FBXO7, FBX7, FBX, PKPS, PARK15	F-box only protein 7	3
NP_036315.1	27022	FOXD3	611539	FOXD3, AIS1, VAMAS2	Forkhead box D3	3
NP_036318.1	2301	FOXE3	601094	FOXE3, FKHL12, ASMD, CTRCT34, ASGD2, AAT11	Forkhead box E3	3
NP_036320.2	2299	FOXI1	601093	FOXI1, FKHL10, FREAC6	Forkhead box I1	3
NP_036325.2	8322	FZD4	604579	FZD4, EVR1	Frizzled, Drosophila, homolog of, 4	3
NP_036332.2	26229	B3GAT3	606374	B3GAT3, GLCATI, JDSCD	Beta-1,3-glucuronyltransferase 3	3
NP_036345.2	23417	MLYCD	606761	MLYCD, MCD	Malonyl-CoA decarboxylase	3
NP_036348.2	11043	MID2	300204	MID2, MRX101	Midline 2	3
NP_036351.3	22808	MRAS	608435	MRAS, RRAS3, NS11	Muscle Ras viral oncogene homolog	3
NP_036364.2	284119	CAVIN1	603198	CAVIN1, PTRF	Caveolae-associated protein 1	3
NP_036382.2	22800	RRAS2	600098	RRAS2, TC21, NS12	Related Ras viral oncogene homolog 2	3
NP_036407.1	26525	IL36RN	605507	IL36RN, IL1F5, FIL1D, IL1HY1, IL1RP3, PSORP, PSORS14	Interleukin 36 receptor antagonist	3
NP_036412.1	24140	FTSJ1	300499	FTSJ1, JM23, SPB1, MRX44, MRX9	FTSJ RNA 2-prime-O-methyltransferase 1	3
NP_036425.1	7837	PXDN	605158	PXDN, D2S448E, KIAA0230, PRG2, PXN, COPOA, ASGD7	Peroxidasin	3
NP_036441.2	22941	SHANK2	603290	SHANK2, CORTBP1, AUTS17	SH3 and multiple ankyrin repeat domains 2	3
NP_036442.3	24137	KIF4A	300521	KIF4A, KIF4, MRX100	Kinesin family member 4A	3
NP_036462.2	23522	KAT6B	605880	KAT6B, MYST4, MORF, GTPTS	Lysine acetyltransferase 6B	3
NP_036519.2	23569	PADI4	605347	PADI4, PADI5, PAD	Peptidylarginine deiminase, type IV	3
NP_036546.2	25782	RAB3GAP2	609275	RAB3GAP2, RAB3GAP150, p150, KIAA0839, WARBM2	RAB3 GTPase-activating protein (noncatalytic) subunit 2	3
NP_036547.1	25788	RAD54B	604289	RAD54B	RAD54 homolog B	3
NP_036563.1	9723	SEMA3E	608166	SEMA3E, SEMAH, KIAA0331	Semaphorin 3E	3
NP_036565.2	23451	SF3B1	605590	SF3B1, SF3B155, SAP155, MDS	Splicing factor 3B, subunit 1	3
NP_036566.1	26503	SLC17A5	604322	SLC17A5, SIASD, SLD	Solute carrier family 17 (sodium phosphate), member 5	3
NP_036584.1	23495	TNFRSF13B	604907	TNFRSF13B, TACI, CVID2	Tumor necrosis factor receptor superfamily, member 13B	3
NP_036595.2	23545	ATP6V0A2	611716	ATP6V0A2, WSS, ARCL2A	ATPase, H+ transporting, V0 subunit A2	3
NP_036596.3	7092	TLL1	606742	TLL1, TLL, ASD6	Tolloid-like 1	3
NP_036601.2	24148	PRPF6	613979	PRPF6, PRP6, ANT1, TOM, C20orf14	Pre-mRNA processing factor 6	3
NP_036602.1	23534	TNPO3	610032	TNPO3, TRNSR, LGMDD2	Transportin 3	3
NP_036610.2	23558	WBP2	606962	WBP2, DFNB107	WW domain-binding protein 2	3
NP_036611.2	7532	YWHAG	605356	YWHAG, EIEE56	Tyrosine 3-monooxygenase/tryptophan 5-monooxygenase activation protein, gamma isoform	3
NP_037368.1	25814	ATXN10	611150	ATXN10, SCA10	Ataxin 10	3
NP_037378.1	23529	CLCF1	607672	CLCF1, BSF3, CLC, CISS2	Cardiotrophin-like cytokine	3
NP_037379.1	27429	HTRA2	606441	HTRA2, OMI, PARK13, PRSS25, MGCA8	HTRA serine peptidase 2	3
NP_037383.1	6866	TAC3	162330	TAC3, NKNB, HH10	Tachykinin 3 (neuromedin K, neurokinin B)	3
NP_037397.2	738	VPS51	615738	VPS51, ANG2, PCH13	VPS51 subunit of GARP complex	3
NP_037408.2	23729	SHPK	605060	SHPK, CARKL	Sedoheptulokinase	3
NP_037421.2	3811	KIR3DL1	604946	KIR3DL1, NKAT3, NKB1, AMB11, KIR3DS1	Killer cell immunoglobulin-like receptor, three domains, long cytoplasmic tail, 1	3
NP_037446.1	29760	BLNK	604515	BLNK, SLP65, AGM4	B-cell linker protein (SH2 domain-containing leukocyte protein, 65kD)	3
NP_037451.1	29914	UBIAD1	611632	UBIAD1, TERE1, SCCD	UbiA prenyltransferase domain-containing protein 1	3
NP_037456.5	1154	CISH	602441	CISH, BACTS2	Cytokine inducible SH2-containing protein	3
NP_037460.2	29920	PYCR2	616406	PYCR2, HLD10	Pyrroline-5-carboxylate reductase 2	3
NP_037466.2	29925	GMPPB	615320	GMPPB, KIAA1851, MDDGA14, MDDGB14, MDDGC14, LGMDR19	GDP-mannose pyrophosphorylase B	3
NP_037467.2	29926	GMPPA	615495	GMPPA, AAMR	GDP-mannose pyrophosphorylase A	3
NP_037468.1	29927	SEC61A1	609213	SEC61A1, SEC61, HNFJ4	SEC61 translocon, alpha-1 subunit	3
NP_037471.2	29929	ALG6	604566	ALG6, CDG1C	ALG6 alpha-1,3-glucosyltransferase	3
NP_037483.1	30009	TBX21	604895	TBX21, TBET	T-box 21	3
NP_037518.3	29957	SLC25A24	608744	SLC25A24, SCAMC1	Solute carrier family 25 (mitochondrial carrier, phosphate carrier), member 24	3
[truncated: 2,179 more rows]

## Sheet: SM3_Lambda_Estimates
Taxon Selection	Gene Families Present in At Least One Taxa	Of those, had no species with >100 gene count	Inferred to be in Ancestor and kept to estimate Lambda	Constrained Tree Lambda	Families that could be analyzed (including large families)
All taxa, Mlei is outgroup	24370	24312	5270	0.000717071	5313
Remove Mlei, Aque is outgroup	24175	24117	6482	0.00088487	6526
Remove Mlei+Aque, Tadh is outgroup	23637	23587	5865	0.000677172	5884
No Mlei+Aque+Tadh, Just Bilateria+Cnidaria	22621	22571	8391	0.00107210138773	8433

## Sheet: X.1_Orthfinder_Overall_Summary
Number of genes	1036563
Number of genes in orthogroups	841525
Number of unassigned genes	195038
Percentage of genes in orthogroups	81.2
Percentage of unassigned genes	18.8
Number of orthogroups	33325
Number of species-specific orthogroups	3163
Number of genes in species-specific orthogroups	17617
Percentage of genes in species-specific orthogroups	1.7
Mean orthogroup size	25.3
Median orthogroup size	5
G50 (assigned genes)	73
G50 (all genes)	56
O50 (assigned genes)	2164
O50 (all genes)	3711
Number of orthogroups with all species present	501
Number of single-copy orthogroups present and single-copy in all species	0

## Sheet: X.2_OF_PerSpecies_Summary
Taxa	Genes	Genes_Assigned	Genes_Unassiged	Percent_In_OG	Percent_Unassigned	Ogs_Containing_Species	Percent_Containing_Species	Species_Specific	Genes_in_SS	Percent_in_Species_Specific
Aaurb	28604	24265	4339	84.8	15.2	9994	30	32	109	0.4	Cnidarian
Aaurp	27044	24501	2543	90.6	9.4	9416	28.3	67	164	0.6	Cnidarian
Adig	26060	24859	1201	95.4	4.6	9278	27.8	20	52	0.2	Cnidarian
Apla	24323	19045	5278	78.3	21.7	7863	23.6	82	530	2.2
Aque	43615	27448	16167	62.9	37.1	7064	21.2	283	1879	4.3
Bflo	28621	23361	5260	81.6	18.4	8014	24	102	626	2.2
Cele	20043	12530	7513	62.5	37.5	6149	18.5	77	846	4.2
Cfra	8694	7875	819	90.6	9.4	6006	18	9	31	0.4
Chem	25087	20690	4397	82.5	17.5	8112	24.3	81	460	1.8	Cnidarian
Cint	13724	12070	1654	87.9	12.1	6521	19.6	41	165	1.2
Cowc	8740	6690	2050	76.5	23.5	4803	14.4	36	213	2.4
Ctel	32175	25594	6581	79.5	20.5	8793	26.4	140	915	2.8
Dgig	22043	20660	1383	93.7	6.3	8024	24.1	43	153	0.7
Dmel	13678	10712	2966	78.3	21.7	5947	17.8	41	163	1.2
Dpul	18440	13126	5314	71.2	28.8	6061	18.2	71	431	2.3	Cnidarian
Drer	30313	27786	2527	91.7	8.3	8240	24.7	63	441	1.5
Epal	22508	21384	1124	95	5	8962	26.9	21	106	0.5	Cnidarian
Ggal	16878	16063	815	95.2	4.8	7813	23.4	7	56	0.3
Hech	28825	25906	2919	89.9	10.1	9938	29.8	46	149	0.5	Cnidarian
Hhon	12010	11472	538	95.5	4.5	6737	20.2	14	42	0.3
Hmag	33820	26584	7236	78.6	21.4	7943	23.8	154	864	2.6	Cnidarian
Hmia	22632	13936	8696	61.6	38.4	5512	16.5	128	765	3.4
Hrob	23432	16981	6451	72.5	27.5	6500	19.5	101	782	3.3
Hsap	20182	18090	2092	89.6	10.4	8339	25	13	97	0.5
Hsym	22022	20776	1246	94.3	5.7	9722	29.2	15	37	0.2	Cnidarian
Isca	20486	13668	6818	66.7	33.3	6152	18.5	50	209	1
Kiwa	5534	3120	2414	56.4	43.6	2394	7.2	8	49	0.9	Cnidarian
Lgig	23340	17624	5716	75.5	24.5	8152	24.5	73	354	1.5
Mbre	9196	7271	1925	79.1	20.9	5115	15.3	31	153	1.7
Mlei	16548	11977	4571	72.4	27.6	5508	16.5	98	663	4
Mvir	24278	18291	5987	75.3	24.7	7979	23.9	52	172	0.7
Ngen	43294	34919	8375	80.7	19.3	9255	27.8	253	1215	2.8
Nnom	19525	17511	2014	89.7	10.3	8541	25.6	28	98	0.5	cnidarian
Nvec	24773	20430	4343	82.5	17.5	8432	25.3	19	69	0.3	cnidarian
Obim	15842	14098	1744	89	11	7417	22.3	35	172	1.1
Ofav	25926	24921	1005	96.1	3.9	9810	29.4	9	23	0.1	cnidarian
Paus	20473	17380	3093	84.9	15.1	8156	24.5	89	384	1.9
Pdam	19935	19385	550	97.2	2.8	9486	28.5	5	12	0.1	cnidarian
Ppac	25517	13417	12100	52.6	47.4	5420	16.3	120	1178	4.6
Rmue	23660	18688	4972	79	21	7261	21.8	54	181	0.8	cnidarian
Sarc	18213	11289	6924	62	38	6171	18.5	57	295	1.6
Scer	6002	3921	2081	65.3	34.7	2770	8.3	30	108	1.8
Skow	20935	18923	2012	90.4	9.6	7986	24	29	133	0.6
Sman	10144	8104	2040	79.9	20.1	5085	15.3	38	163	1.6
Smed	31102	22516	8586	72.4	27.6	6303	18.9	304	1280	4.1
Sros	11624	8849	2775	76.1	23.9	5764	17.3	28	198	1.7
Tadh	12633	11661	972	92.3	7.7	6900	20.7	8	39	0.3
Tcas	12874	11239	1635	87.3	12.7	6364	19.1	25	130	1
Xtro	21196	19919	1277	94	6	8343	25	33	263	1.2

## Sheet: X.3_TaxonSpecificity_Metazoans
Species	Tree_Abbrev	Phylum	phylum_specific_not_species_specific_gene_counts	metazoan_specific	Genes	Genes_Assigned	Genes_Unassigned	Genes_in_SS	Multi_NotSS_NotPhylumSpec	Other_Multi
acanthaster_planci	A. planci		530	6876	24323	19045	5278	0	18515	11639
amphimedon_queenslandica	A. queenslandica		1879	7956	43615	27448	16167	0	25569	17613
hofstenia_miamia	H. miamia		765	4283	22632	13936	8696	0	13171	8888
mnemiopsis_leidyi	M. leidyi		663	2898	16548	11977	4571	0	11314	8416
notospermus_geniculatus	N. geniculatus		1215	14247	43294	34919	8375	0	33704	19457
phoronis_australis	P. australis		384	5247	20473	17380	3093	0	16996	11749
saccoglossus_kowalevskii	S. kowalevskii		133	5813	20935	18923	2012	0	18790	12977
branchiostoma_floridae	B. floridae		146	7706	28621	23361	5260	626	22589	14883
lottia_gigantea	L. gigantea		155	5834	23340	17624	5716	354	17115	11281
kudoa_iwatai	K. iwatai		39	248	5534	3120	2414	49	3032	2784
capitella_teleta	C. teleta		243	9555	32175	25594	6581	915	24436	14881
ciona_intestinalis	C. intestinalis		106	2892	13724	12070	1654	165	11799	8907
octopus_bimaculoides	O. bimaculoides		124	4092	15842	14098	1744	172	13802	9710
helobdella_robusta	H. robusta		271	5436	23432	16981	6451	782	15928	10492
ixodes_scapularis	I. scapularis		244	3731	20486	13668	6818	209	13215	9484
schmidtea_mediterranea	S. mediterranea		546	6009	31102	22516	8586	1280	20690	14681
schistosoma_mansoni	S. mansoni		270	1610	10144	8104	2040	163	7671	6061
daphnia_pulex	D. pulex		588	3323	18440	13126	5314	431	12107	8784
renilla_muelleri	R. muelleri		1266	7942	23660	18688	4972	181	17241	9299
drosophila_melanogaster	D. melanogaster		772	2680	13678	10712	2966	163	9777	7097
morbakka_virulenta	M. virulenta		1479	7350	24278	18291	5987	172	16640	9290
hydra_magnipapillata	H. vulgaris		2169	12788	33820	26584	7236	864	23551	10763
nematostella_vectensis	N. vectensis		1603	6644	24773	20430	4343	69	18758	12114
dendronephthya_gigantea	D. gigantea		1433	7958	22043	20660	1383	153	19074	11116
tribolium_castaneum	T. castaneum		894	3101	12874	11239	1635	130	10215	7114
danio_rerio	D. rerio		2107	9031	30313	27786	2527	441	25238	16207
pristionchus_pacificus	P. pacificus		2128	4510	25517	13417	12100	1178	10111	5601
xenopus_tropicalis	X. tropicalis		1799	6734	21196	19919	1277	263	17857	11123
homo_sapiens	H. sapiens		1843	6051	20182	18090	2092	97	16150	10099
gallus_gallus	G. gallus		1594	5105	16878	16063	815	56	14413	9308
exaiptasia_pallida	E. pallida		2165	8430	22508	21384	1124	106	19113	10683
caenorhabditis_elegans	C. elegans		2006	3959	20043	12530	7513	846	9678	5719
clytia_hemisphaerica	C. hemisphaerica		2597	9219	25087	20690	4397	460	17633	8414
trichoplax_adhaerens	T. adhaerens		1323	3477	12633	11661	972	39	10299	6822
acropora_digitifera	A. digitifera		2918	10574	26060	24859	1201	52	21889	11315
hoilungia_hongkongensis	H. hongkongensis		1407	3439	12010	11472	538	42	10023	6584
nemopilema_nomurai	N. nomurai		2349	6844	19525	17511	2014	98	15064	8220
orbicella_faveolata	O. faveolata		3326	10416	25926	24921	1005	23	21572	11156
pocillopora_damicornis	P. damicornis		2733	7975	19935	19385	550	12	16640	8665
aurelia_aurita_atlantic	A. aurita (Baltic)		4097	11275	28604	24265	4339	109	20059	8784
aurelia_aurita_pacific	A. aurita (Pacific)		4490	11624	27044	24501	2543	164	19847	8223
hydractinia_echinata	H. echinata		6284	13594	28825	25906	2919	149	19473	5879
hydractinia_symbiolongicarpus	H. symbiolongicarpus		4976	10088	22022	20776	1246	37	15763	5675

## Sheet: X.4_Unassiged_Genes_DIAMOND
species	unassigned	no_blast_hit	uncharacterized	other_genes	Percent_No_BLAST_hit	Percent_Uncharacterized	percent_uncharacterized_NoHit	percent_functional_gene	Percent_Some_Hit	Num_Some_Hit	Percent_of_Hit_Uncharacterized
salpingoeca_rosetta	2775	18	0	2757	0.648649	0	0.648649	99.3514	99.3514	2757	0
pristionchus_pacificus	12100	216	0	11884	1.78512	0	1.78512	98.2149	98.2149	11884	0
sphaeroforma_arctica	6924	133	0	6791	1.92085	0	1.92085	98.0791	98.0791	6791	0
capsaspora_owczarzaki	2050	46	0	2004	2.2439	0	2.2439	97.7561	97.7561	2004	0
ixodes_scapularis	6818	156	0	6662	2.28806	0	2.28806	97.7119	97.7119	6662	0
monosiga_brevicolis	1925	60	0	1865	3.11688	0	3.11688	96.8831	96.8831	1865	0
helobdella_robusta	6451	294	0	6157	4.55743	0	4.55743	95.4426	95.4426	6157	0
capitella_teleta	6581	650	0	5931	9.87692	0	9.87692	90.1231	90.1231	5931	0
branchiostoma_floridae	5260	593	0	4667	11.2738	0	11.2738	88.7262	88.7262	4667	0
hoilungia_hongkongensis	538	307	0	231	57.0632	0	57.0632	42.9368	42.9368	231	0
nematostella_vectensis	4343	2504	0	1839	57.656	0	57.656	42.344	42.344	1839	0
creolimax_fragrantissima	819	659	0	160	80.464	0	80.464	19.536	19.536	160	0
lottia_gigantea	5716	1444	1	4271	25.2624	0.0174948	25.2799	74.7201	74.7376	4272	0.0234082
saccharomyces_cerevisiae	2081	10	1	2070	0.480538	0.0480538	0.528592	99.4714	99.5195	2071	0.0482859
trichoplax_adhaerens	972	314	2	656	32.3045	0.205761	32.5103	67.4897	67.6955	658	0.303951
schmidtea_mediterranea	8586	6434	89	2063	74.9359	1.03657	75.9725	24.0275	25.0641	2152	4.13569
kudoa_iwatai	2414	2357	3	54	97.6388	0.124275	97.763	2.23695	2.36123	57	5.26316
mnemiopsis_leidyi	4571	4172	24	375	91.2711	0.525049	91.7961	8.20389	8.72894	399	6.01504
daphnia_pulex	5314	1715	241	3358	32.2732	4.53519	36.8084	63.1916	67.7268	3599	6.6963
hofstenia_miamia	8696	7918	58	720	91.0534	0.666973	91.7203	8.27967	8.94664	778	7.45501
aurelia_aurita_pacific	2543	2123	37	383	83.4841	1.45497	84.939	15.061	16.5159	420	8.80952
gallus_gallus	815	139	62	614	17.0552	7.60736	24.6626	75.3374	82.9448	676	9.1716
hydractinia_symbiolongicarpus	1246	1128	11	107	90.5297	0.882825	91.4125	8.58748	9.4703	118	9.32203
schistosoma_mansoni	2040	360	184	1496	17.6471	9.01961	26.6667	73.3333	82.3529	1680	10.9524
hydractinia_echinata	2919	2575	73	271	88.2151	2.50086	90.716	9.284	11.7849	344	21.2209
nemopilema_nomurai	2014	1923	23	68	95.4816	1.14201	96.6236	3.37637	4.51837	91	25.2747
homo_sapiens	2092	119	499	1474	5.68834	23.8528	29.5411	70.4589	94.3117	1973	25.2914
danio_rerio	2527	407	591	1529	16.1061	23.3874	39.4935	60.5065	83.8939	2120	27.8774
aurelia_aurita_atlantic	4339	3786	185	368	87.2551	4.26366	91.5188	8.48122	12.7449	553	33.4539
xenopus_tropicalis	1277	76	405	796	5.95145	31.715	37.6664	62.3336	94.0486	1201	33.7219
morbakka_virulenta	5987	4738	426	823	79.1381	7.11542	86.2535	13.7465	20.8619	1249	34.1073
notospermus_geniculatus	8375	6951	528	896	82.997	6.30448	89.3015	10.6985	17.003	1424	37.0787
phoronis_australis	3093	2771	121	201	89.5894	3.91206	93.5015	6.49855	10.4106	322	37.5776
clytia_hemisphaerica	4397	4049	149	199	92.0855	3.38867	95.4742	4.52581	7.91449	348	42.8161
exaiptasia_pallida	1124	78	458	588	6.9395	40.7473	47.6868	52.3132	93.0605	1046	43.7859
renilla_muelleri	4972	3642	598	732	73.2502	12.0274	85.2776	14.7224	26.7498	1330	44.9624
saccoglossus_kowalevskii	2012	370	812	830	18.3897	40.3579	58.7475	41.2525	81.6103	1642	49.4519
octopus_bimaculoides	1744	54	908	782	3.09633	52.0642	55.1606	44.8394	96.9037	1690	53.7278
acanthaster_planci	5278	3334	1075	869	63.1679	20.3676	83.5354	16.4646	36.8321	1944	55.2984
orbicella_faveolata	1005	77	577	351	7.66169	57.4129	65.0746	34.9254	92.3383	928	62.1767
hydra_magnipapillata	7236	3089	2684	1463	42.6893	37.0923	79.7816	20.2184	57.3107	4147	64.7215
pocillopora_damicornis	550	22	345	183	4	62.7273	66.7273	33.2727	96	528	65.3409
drosophila_melanogaster	2966	79	1979	908	2.66352	66.7229	69.3864	30.6136	97.3365	2887	68.5487
amphimedon_queenslandica	16167	6960	6328	2879	43.0507	39.1415	82.1921	17.8079	56.9493	9207	68.7303
acropora_digitifera	1201	55	788	358	4.57952	65.612	70.1915	29.8085	95.4205	1146	68.7609
tribolium_castaneum	1635	28	1106	501	1.71254	67.6453	69.3578	30.6422	98.2875	1607	68.8239
caenorhabditis_elegans	7513	137	5139	2237	1.82351	68.4014	70.2249	29.7751	98.1765	7376	69.6719
dendronephthya_gigantea	1383	73	924	386	5.27838	66.8113	72.0897	27.9103	94.7216	1310	70.5344
ciona_intestinalis	1654	5	1278	371	0.302297	77.2672	77.5695	22.4305	99.6977	1649	77.5015

## Sheet: X.5_Unique_Shared_Bilateria
species	Num_Seq	OGs_Shared_With_Bilateria	unique_overlap_bilateria
acropora_digitifera		7267	68
aurelia_aurita_atlantic		7058	73
aurelia_aurita_pacific		6469	97
clytia_hemisphaerica		6474	120
dendronephthya_gigantea		6997	83
exaiptasia_pallida		7453	91
hydra_magnipapillata		6541	352
hydractinia_echinata		6630	33
hydractinia_symbiolongicarpus		6563	10
kudoa_iwatai		2350	7
morbakka_virulenta		6832	113
nematostella_vectensis		7218	183
nemopilema_nomurai		6747	19
orbicella_faveolata		7513	75
pocillopora_damicornis		7386	21
renilla_muelleri		6255	123

## Sheet: X.6_OMIM_In_Symbio
GeneModel_ID	OMIM_RBBH	MIM_Number_of_RBBH	Orthogroup_Assignment_of_Symbio_Seq	Number_of_OMIM_Seq_In_OG	Is_RBBH_In_OG	OMIM_Proteins_In_Orthogroup		X3	X4	X5	X6	X7	X8	X9	X10	X11	X12	X13	X14	X15	X16	X17	X18	X19	X20	X21	X22	X23	X24	X25	X26	X27	X28	X29	X30	X31	X32	X33	X34
HyS0001.101			OG0000287	2		Hsap_NP_057240.3	Hsap_XP_011529474.1
HyS0001.105			OG0000181	1		Hsap_NP_005092.1
HyS0001.112	Hsap_XP_005266116.1	613036	OG0004210	1	TRUE	Hsap_XP_005266116.1
HyS0001.114			OG0000529	1		Hsap_XP_005258728.1
HyS0001.119	Hsap_NP_054884.1	611776	OG0006494	1	TRUE	Hsap_NP_054884.1
HyS0001.121	Hsap_NP_009297.2	189980	OG0000044	10	TRUE	Hsap_NP_001274273.1	Hsap_NP_004295.2	Hsap_NP_005537.3	Hsap_NP_009297.2	Hsap_XP_011523331.1	Hsap_XP_011542127.1	Hsap_XP_016856524.1	Hsap_XP_016860356.1	Hsap_XP_016883514.1	Hsap_XP_024302815.1
HyS0001.124	Hsap_NP_009140.1	618315	OG0002563	1	TRUE	Hsap_NP_009140.1
HyS0001.125	Hsap_XP_011507705.1	614512	OG0016518
HyS0001.126	Hsap_NP_000104.1	605204	OG0001043	1	TRUE	Hsap_NP_000104.1
HyS0001.127	Hsap_XP_006717199.1	611971	OG0004055	1	TRUE	Hsap_XP_006717199.1
HyS0001.138			OG0000318	9		Hsap_NP_000079.2	Hsap_NP_000080.2	Hsap_NP_000081.1	Hsap_NP_000384.2	Hsap_NP_001265003.1	Hsap_NP_116277.2	Hsap_NP_542411.2	Hsap_XP_016855823.1	Hsap_XP_016874317.1
HyS0001.139			OG0000318	9		Hsap_NP_000079.2	Hsap_NP_000080.2	Hsap_NP_000081.1	Hsap_NP_000384.2	Hsap_NP_001265003.1	Hsap_NP_116277.2	Hsap_NP_542411.2	Hsap_XP_016855823.1	Hsap_XP_016874317.1
HyS0001.148			OG0000253	2		Hsap_NP_001275693.1	Hsap_XP_011536085.1
HyS0001.149			OG0000282	8		Hsap_NP_000159.3	Hsap_NP_001035878.1	Hsap_NP_003403.2	Hsap_NP_003404.1	Hsap_NP_009060.2	Hsap_NP_115964.2	Hsap_XP_011509271.2	Hsap_XP_011536491.1
HyS0001.151	Hsap_XP_011533689.2	610652	OG0000328	5	TRUE	Hsap_NP_000431.2	Hsap_NP_006195.3	Hsap_NP_058649.3	Hsap_XP_011511775.1	Hsap_XP_011533689.2
HyS0001.164			OG0000089	3		Hsap_NP_001978.1	Hsap_NP_002008.2	Hsap_NP_006485.2
HyS0001.166			OG0000032	3		Hsap_NP_003042.3	Hsap_NP_006508.2	Hsap_XP_016871727.1
HyS0001.167			OG0000032	3		Hsap_NP_003042.3	Hsap_NP_006508.2	Hsap_XP_016871727.1
HyS0001.172	Hsap_NP_055690.1	611279	OG0000165	4	TRUE	Hsap_NP_001230937.1	Hsap_NP_006603.2	Hsap_NP_055690.1	Hsap_NP_055889.2
HyS0001.177			OG0000051	3		Hsap_NP_004347.1	Hsap_NP_004606.2	Hsap_NP_620599.1
HyS0001.180	Hsap_XP_005245867.1	610513	OG0000868	1	TRUE	Hsap_XP_005245867.1
HyS0001.182			OG0000414	1		Hsap_NP_055440.1
HyS0001.185			OG0000022	1		Hsap_NP_000321.1
HyS0001.186			OG0000022	1		Hsap_NP_000321.1
HyS0001.188			OG0000022	1		Hsap_NP_000321.1
HyS0001.196			OG0000035	9		Hsap_NP_000208.2	Hsap_NP_001106212.1	Hsap_NP_002224.1	Hsap_NP_002225.2	Hsap_NP_004965.1	Hsap_NP_004968.2	Hsap_NP_598004.1	Hsap_XP_005270908.1	Hsap_XP_011527101.1
HyS0001.197			OG0000006	22		Hsap_NP_000124.1	Hsap_NP_000292.1	Hsap_NP_000495.1	Hsap_NP_000497.1	Hsap_NP_001088.2	Hsap_NP_001182058.1	Hsap_NP_001275929.1	Hsap_NP_001290343.1	Hsap_NP_002248.1	Hsap_NP_004123.1	Hsap_NP_004908.4	Hsap_NP_006578.2	Hsap_NP_068813.1	Hsap_NP_076927.1	Hsap_XP_005262878.1	Hsap_XP_011514713.1	Hsap_XP_011527957.1	Hsap_XP_011530232.1	Hsap_XP_011535776.2	Hsap_XP_011538168.1	Hsap_XP_011538852.1	Hsap_XP_024308770.1
HyS0001.199			OG0000035	9		Hsap_NP_000208.2	Hsap_NP_001106212.1	Hsap_NP_002224.1	Hsap_NP_002225.2	Hsap_NP_004965.1	Hsap_NP_004968.2	Hsap_NP_598004.1	Hsap_XP_005270908.1	Hsap_XP_011527101.1
HyS0001.200			OG0000094	8		Hsap_NP_055058.2	Hsap_NP_055059.2	Hsap_NP_112219.3	Hsap_NP_620594.1	Hsap_NP_955387.1	Hsap_XP_005272294.1	Hsap_XP_011507946.1	Hsap_XP_016877462.1
HyS0001.204			OG0000170	6		Hsap_NP_000341.2	Hsap_NP_001080.2	Hsap_NP_758424.1	Hsap_XP_011509253.1	Hsap_XP_016869869.1	Hsap_XP_024307084.1
HyS0001.211			OG0000522	1		Hsap_NP_001338457.1
HyS0001.224	Hsap_XP_011507889.1	191311	OG0010562
HyS0001.229			OG0000280	2		Hsap_NP_000624.2	Hsap_NP_001278357.1
HyS0001.232	Hsap_NP_001305051.1	103000	OG0001103	1	TRUE	Hsap_NP_001305051.1
HyS0001.237	Hsap_NP_004165.2	182307	OG0001000	2	TRUE	Hsap_NP_003038.2	Hsap_NP_004165.2
HyS0001.238			OG0001000	2		Hsap_NP_003038.2	Hsap_NP_004165.2
HyS0001.248	Hsap_XP_011529011.1	603560	OG0001860	2	TRUE	Hsap_XP_005253211.1	Hsap_XP_011529011.1
HyS0001.249			OG0000212	2		Hsap_NP_004264.2	Hsap_NP_067628.1
HyS0001.255	Hsap_NP_008860.4	600478	OG0000962	1	TRUE	Hsap_NP_008860.4
HyS0001.257	Hsap_XP_011529987.1	607481	OG0004456	1	TRUE	Hsap_XP_011529987.1
HyS0001.258			OG0000140	1		Hsap_NP_004125.3
HyS0001.259			OG0000123	5		Hsap_NP_000058.1	Hsap_NP_001209.1	Hsap_NP_001308766.1	Hsap_XP_005257696.1	Hsap_XP_011521611.1
HyS0001.260	Hsap_XP_006717055.1	602377	OG0000633	3	TRUE	Hsap_NP_001005360.1	Hsap_NP_001265393.1	Hsap_XP_006717055.1
HyS0001.262			OG0000011	11		Hsap_NP_001157814.1	Hsap_NP_001316524.1	Hsap_NP_001336347.1	Hsap_NP_005997.2	Hsap_NP_006054.2	Hsap_NP_055612.2	Hsap_NP_059111.2	Hsap_NP_071324.1	Hsap_NP_085127.2	Hsap_NP_689606.2	Hsap_XP_006715816.1
HyS0001.264	Hsap_NP_001338557.1	617353	OG0000205	1	TRUE	Hsap_NP_001338557.1
HyS0001.269			OG0000500	6		Hsap_NP_000120.2	Hsap_NP_000350.1	Hsap_NP_003236.3	Hsap_NP_945345.2	Hsap_NP_963925.2	Hsap_XP_011519652.1
HyS0001.273			OG0000592	1		Hsap_NP_079533.2
HyS0001.275			OG0000069	3		Hsap_NP_005870.2	Hsap_NP_899196.1	Hsap_NP_899237.1
HyS0001.276	Hsap_NP_060887.2	605205	OG0002695	1	TRUE	Hsap_NP_060887.2
HyS0001.281			OG0001815	2		Hsap_NP_037521.2	Hsap_XP_005258334.1
HyS0001.290	Hsap_NP_005575.1	601280	OG0000840	2	TRUE	Hsap_NP_005575.1	Hsap_NP_006430.1
HyS0001.301			OG0000027	7		Hsap_NP_000249.1	Hsap_NP_001292553.1	Hsap_NP_001305425.1	Hsap_NP_524144.1	Hsap_XP_006720321.1	Hsap_XP_011543483.1	Hsap_XP_016880172.1
HyS0001.302			OG0000007	12		Hsap_NP_000015.1	Hsap_NP_000016.1	Hsap_NP_000515.2	Hsap_NP_000612.1	Hsap_NP_000673.2	Hsap_NP_000674.2	Hsap_NP_000675.1	Hsap_NP_000788.2	Hsap_NP_000789.1	Hsap_NP_001277738.1	Hsap_NP_473362.1	Hsap_XP_016855642.1
HyS0001.305	Hsap_NP_060360.3	607817	OG0002545	1	TRUE	Hsap_NP_060360.3
HyS0001.306			OG0001317	1		Hsap_XP_024304387.1
HyS0001.31	Hsap_XP_005249419.1	192150	OG0001420	2	TRUE	Hsap_NP_001161206.1	Hsap_XP_005249419.1
HyS0001.310	Hsap_NP_659496.2	608675	OG0004037	1	TRUE	Hsap_NP_659496.2
HyS0001.311			OG0004017	1		Hsap_XP_011525416.1
HyS0001.315	Hsap_NP_000780.1	106180	OG0000586	1	TRUE	Hsap_NP_000780.1
HyS0001.318	Hsap_NP_665858.1	609118	OG0005035	1	TRUE	Hsap_NP_665858.1
HyS0001.321			OG0000766	1		Hsap_NP_001544.1
HyS0001.323			OG0000586	1		Hsap_NP_000780.1
HyS0001.324			OG0000586	1		Hsap_NP_000780.1
HyS0001.33			OG0001424	1		Hsap_XP_011532451.1
HyS0001.334	Hsap_XP_005246139.1	610767	OG0002858	1	TRUE	Hsap_XP_005246139.1
HyS0001.337			OG0000154	2		Hsap_NP_000592.3	Hsap_NP_005568.2
HyS0001.339	Hsap_XP_011524280.1	600805	OG0000090	10	TRUE	Hsap_NP_001017402.1	Hsap_NP_001098676.2	Hsap_NP_005553.2	Hsap_XP_005265184.1	Hsap_XP_006721658.1	Hsap_XP_011516423.1	Hsap_XP_011523957.1	Hsap_XP_011524280.1	Hsap_XP_016866340.1	Hsap_XP_016867690.1
HyS0001.340			OG0000090	10		Hsap_NP_001017402.1	Hsap_NP_001098676.2	Hsap_NP_005553.2	Hsap_XP_005265184.1	Hsap_XP_006721658.1	Hsap_XP_011516423.1	Hsap_XP_011523957.1	Hsap_XP_011524280.1	Hsap_XP_016866340.1	Hsap_XP_016867690.1
HyS0001.341	Hsap_NP_001257376.1	609575	OG0001768	2	TRUE	Hsap_NP_001257376.1	Hsap_NP_054768.2
HyS0001.343	Hsap_NP_003841.1	603921	OG0001357	1	TRUE	Hsap_NP_003841.1
HyS0001.344	Hsap_NP_005699.1	604404	OG0001273	3	TRUE	Hsap_NP_001158089.1	Hsap_NP_001439.2	Hsap_NP_005699.1
HyS0001.345	Hsap_NP_006160.1	600008	OG0000768	1	TRUE	Hsap_NP_006160.1
HyS0001.347			OG0000193	3		Hsap_NP_001305990.1	Hsap_NP_002089.4	Hsap_XP_005270849.1
HyS0001.350			OG0000418	6		Hsap_NP_006500.2	Hsap_NP_065390.1	Hsap_NP_068810.3	Hsap_XP_011525500.2	Hsap_XP_016871767.1	Hsap_XP_024309835.1
HyS0001.355	Hsap_NP_003650.1	603051	OG0004019	1	TRUE	Hsap_NP_003650.1
HyS0001.365			OG0000379	1		Hsap_NP_055555.1
HyS0001.373			OG0000575	2		Hsap_NP_002023.2	Hsap_XP_024307215.1
HyS0001.374	Hsap_NP_001186127.1	617687	OG0003289	1	TRUE	Hsap_NP_001186127.1
HyS0001.38	Hsap_XP_005268979.3	604759	OG0006843	1	TRUE	Hsap_XP_005268979.3
HyS0001.385			OG0000048	4		Hsap_NP_075044.2	Hsap_NP_612808.1	Hsap_XP_011529322.1	Hsap_XP_016866294.1
HyS0001.387			OG0000003	12		Hsap_NP_000570.1	Hsap_NP_000625.1	Hsap_NP_001050.1	Hsap_NP_001116513.2	Hsap_NP_001155969.1	Hsap_NP_001164645.1	Hsap_NP_001166031.1	Hsap_NP_001334985.1	Hsap_NP_004826.5	Hsap_NP_115940.2	Hsap_NP_940799.1	Hsap_XP_011515565.1
HyS0001.398			OG0000674	2		Hsap_XP_005251850.1	Hsap_XP_011538487.1
HyS0001.403	Hsap_NP_005853.2	604358	OG0001711	3	TRUE	Hsap_NP_001036215.1	Hsap_NP_005853.2	Hsap_XP_016867173.1
HyS0001.405	Hsap_XP_006713721.1	171834	OG0000657	3	TRUE	Hsap_NP_001308307.1	Hsap_XP_006713721.1	Hsap_XP_016856970.1
HyS0001.407			OG0000075	3		Hsap_NP_001310442.1	Hsap_NP_004302.1	Hsap_XP_016856722.1
HyS0001.408	Hsap_NP_001186552.1	612120	OG0001808	1	TRUE	Hsap_NP_001186552.1
HyS0001.412	Hsap_XP_011540294.1	181590	OG0004641	1	TRUE	Hsap_XP_011540294.1
HyS0001.413	Hsap_NP_001295093.1	606639	OG0001230	2	TRUE	Hsap_NP_001268231.1	Hsap_NP_001295093.1
HyS0001.415	Hsap_XP_005264059.1	601181	OG0000624	1	TRUE	Hsap_XP_005264059.1
HyS0001.417			OG0000624	1		Hsap_XP_005264059.1
HyS0001.422	Hsap_NP_001137251.1	605489	OG0005689	1	TRUE	Hsap_NP_001137251.1
HyS0001.423			OG0000427	3		Hsap_NP_995322.1	Hsap_XP_011534738.1	Hsap_XP_024305871.1
HyS0001.424	Hsap_NP_055843.1	610005	OG0001700	1	TRUE	Hsap_NP_055843.1
HyS0001.429			OG0000150	4		Hsap_NP_001035982.1	Hsap_NP_006720.1	Hsap_XP_016877084.1	Hsap_XP_024310152.1
HyS0001.443	Hsap_NP_775924.1	608396	OG0000752	3	TRUE	Hsap_NP_001036002.1	Hsap_NP_775924.1	Hsap_XP_016885394.1
HyS0001.444			OG0000035	9		Hsap_NP_000208.2	Hsap_NP_001106212.1	Hsap_NP_002224.1	Hsap_NP_002225.2	Hsap_NP_004965.1	Hsap_NP_004968.2	Hsap_NP_598004.1	Hsap_XP_005270908.1	Hsap_XP_011527101.1
HyS0001.445	Hsap_NP_005111.2	300188	OG0002167	1	TRUE	Hsap_NP_005111.2
HyS0001.446	Hsap_NP_004606.2	300096	OG0000051	3	TRUE	Hsap_NP_004347.1	Hsap_NP_004606.2	Hsap_NP_620599.1
HyS0001.454			OG0000063	7		Hsap_NP_001177740.1	Hsap_NP_002130.2	Hsap_NP_004072.3	Hsap_NP_112533.1	Hsap_NP_112740.1	Hsap_XP_005268883.1	Hsap_XP_016856357.1
HyS0001.455	Hsap_NP_005348.2	151750	OG0002533	1	TRUE	Hsap_NP_005348.2
HyS0001.458	Hsap_NP_000628.2	138300	OG0005362	1	TRUE	Hsap_NP_000628.2
HyS0001.462	Hsap_NP_002848.1	600279	OG0003601	1	TRUE	Hsap_NP_002848.1
HyS0001.463	Hsap_NP_000048.1	604610	OG0000644	1	TRUE	Hsap_NP_000048.1
HyS0001.477			OG0000561	1		Hsap_NP_001124151.1
HyS0001.478	Hsap_NP_945353.1	601855	OG0000641	3	TRUE	Hsap_NP_945353.1	Hsap_XP_011508441.1	Hsap_XP_011526137.1
HyS0001.480			OG0000478	2		Hsap_NP_036462.2	Hsap_XP_011542958.1
HyS0001.481			OG0000165	4		Hsap_NP_001230937.1	Hsap_NP_006603.2	Hsap_NP_055690.1	Hsap_NP_055889.2
HyS0001.486			OG0001008	1		Hsap_XP_011543793.1
HyS0001.487	Hsap_XP_006713890.1	613516	OG0000591	2	TRUE	Hsap_NP_055613.1	Hsap_XP_006713890.1
HyS0001.494	Hsap_NP_067043.2	616441	OG0004075
HyS0001.497	Hsap_NP_005923.2	602241	OG0003851	1	TRUE	Hsap_NP_005923.2
HyS0001.498	Hsap_NP_001116078.1	309060	OG0001688	1	TRUE	Hsap_NP_001116078.1
HyS0001.506	Hsap_NP_000278.3	601498	OG0000255	4	TRUE	Hsap_NP_000278.3	Hsap_NP_000457.1	Hsap_NP_009057.1	Hsap_XP_016863314.1
HyS0001.511			OG0000050	1		Hsap_NP_001336091.1
HyS0001.512			OG0000050	1		Hsap_NP_001336091.1
HyS0001.513			OG0000050	1		Hsap_NP_001336091.1
HyS0001.515			OG0000984	2		Hsap_NP_001317240.1	Hsap_XP_005247229.1
HyS0001.516	Hsap_NP_000475.1	104760	OG0002752	1	TRUE	Hsap_NP_000475.1
HyS0001.517	Hsap_NP_919253.1	300628	OG0000207	3	TRUE	Hsap_NP_919253.1	Hsap_XP_011526969.1	Hsap_XP_011539258.1
HyS0001.518			OG0000254	3		Hsap_NP_005844.4	Hsap_NP_733775.1	Hsap_NP_733796.2
HyS0001.521	Hsap_NP_647480.1	607557	OG0000096	3	TRUE	Hsap_NP_001091956.1	Hsap_NP_036566.1	Hsap_NP_647480.1
HyS0001.528			OG0000737	5		Hsap_NP_000065.1	Hsap_NP_000585.2	Hsap_NP_000630.1	Hsap_NP_001153212.1	Hsap_NP_003692.1
HyS0001.530	Hsap_NP_001274.1	603531	OG0000681	5	TRUE	Hsap_NP_001034658.1	Hsap_NP_001274.1	Hsap_NP_009008.2	Hsap_XP_011524725.1	Hsap_XP_016885414.1
HyS0001.531	Hsap_NP_899237.1	609247	OG0000069	3	TRUE	Hsap_NP_005870.2	Hsap_NP_899196.1	Hsap_NP_899237.1
HyS0001.532	Hsap_XP_011543348.2	276903	OG0000194	5	TRUE	Hsap_NP_004136.2	Hsap_XP_011517800.1	Hsap_XP_011519916.1	Hsap_XP_011543348.2	Hsap_XP_016880204.1
HyS0001.533	Hsap_NP_005179.2	165360	OG0002294	1	TRUE	Hsap_NP_005179.2
HyS0001.534			OG0000664	1		Hsap_XP_016869711.1
HyS0001.547			OG0000299	2		Hsap_NP_009049.2	Hsap_XP_006713873.1
HyS0001.557	Hsap_NP_009053.1	191523	OG0002713	1	TRUE	Hsap_NP_009053.1
HyS0001.559			OG0003437	1		Hsap_NP_542172.2
HyS0001.56	Hsap_XP_011522020.1	607273	OG0003453	1	TRUE	Hsap_XP_011522020.1
HyS0001.567	Hsap_XP_024308119.1	300157	OG0000416	2	TRUE	Hsap_NP_001009185.1	Hsap_XP_024308119.1
HyS0001.569			OG0000539	1		Hsap_NP_861448.2
HyS0001.57	Hsap_NP_001073272.1	606800	OG0000527	2	TRUE	Hsap_NP_001032.2	Hsap_NP_001073272.1
HyS0001.570	Hsap_NP_001681.2	607027	OG0002479	1	TRUE	Hsap_NP_001681.2
HyS0001.573			OG0002406	2		Hsap_NP_000296.2	Hsap_NP_000437.3
HyS0001.576	Hsap_NP_689830.2	612688	OG0005387	1	TRUE	Hsap_NP_689830.2
HyS0001.577			OG0000179	1		Hsap_XP_011521787.1
HyS0001.578	Hsap_XP_011507965.1	600923	OG0003110	1	TRUE	Hsap_XP_011507965.1
HyS0001.580			OG0000154	2		Hsap_NP_000592.3	Hsap_NP_005568.2
HyS0001.587			OG0001267	1		Hsap_NP_543136.1
HyS0001.588	Hsap_XP_016856940.1	610554	OG0005569	1	TRUE	Hsap_XP_016856940.1
HyS0001.608			OG0000529	1		Hsap_XP_005258728.1
HyS0001.61	Hsap_NP_001291740.1	616082	OG0004620	1	TRUE	Hsap_NP_001291740.1
HyS0001.62	Hsap_NP_001272972.1	607008	OG0004227	1	TRUE	Hsap_NP_001272972.1
HyS0001.625	Hsap_XP_011524338.1	607461	OG0003065	1	TRUE	Hsap_XP_011524338.1
HyS0001.627	Hsap_XP_016882602.1	603474	OG0003097	1	TRUE	Hsap_XP_016882602.1
HyS0001.63			OG0002721	1		Hsap_XP_016877638.1
HyS0001.630			OG0000004	4		Hsap_NP_001072.2	Hsap_NP_006120.1	Hsap_NP_036596.3	Hsap_NP_113621.1
HyS0001.631			OG0000004	4		Hsap_NP_001072.2	Hsap_NP_006120.1	Hsap_NP_036596.3	Hsap_NP_113621.1
HyS0001.632			OG0000004	4		Hsap_NP_001072.2	Hsap_NP_006120.1	Hsap_NP_036596.3	Hsap_NP_113621.1
HyS0001.633	Hsap_XP_005261565.1	609063	OG0000406	1	TRUE	Hsap_XP_005261565.1
HyS0001.635	Hsap_XP_016884928.1	300516	OG0000307	3	TRUE	Hsap_NP_005594.1	Hsap_NP_057613.4	Hsap_XP_016884928.1
HyS0001.637	Hsap_XP_011528076.1	613381	OG0000863	1	TRUE	Hsap_XP_011528076.1
HyS0001.638			OG0000099	9		Hsap_NP_002412.1	Hsap_NP_002413.1	Hsap_NP_002418.1	Hsap_NP_002420.1	Hsap_NP_004521.1	Hsap_NP_004762.2	Hsap_NP_004985.2	Hsap_NP_004986.1	Hsap_NP_671724.1
HyS0001.64			OG0002721	1		Hsap_XP_016877638.1
HyS0001.641			OG0000072	5		Hsap_NP_000435.3	Hsap_NP_004817.2	Hsap_XP_005250050.1	Hsap_XP_011511158.1	Hsap_XP_011539174.1
HyS0001.644			OG0000030	1		Hsap_XP_016877107.1
HyS0001.646			OG0000072	5		Hsap_NP_000435.3	Hsap_NP_004817.2	Hsap_XP_005250050.1	Hsap_XP_011511158.1	Hsap_XP_011539174.1
HyS0001.651	Hsap_NP_066970.3	607752	OG0000243	3	TRUE	Hsap_NP_001750.1	Hsap_NP_066970.3	Hsap_NP_444284.1
HyS0001.652			OG0000594	2		Hsap_NP_003347.1	Hsap_XP_024304442.1
HyS0001.654	Hsap_NP_002426.1	154550	OG0003485	1	TRUE	Hsap_NP_002426.1
HyS0001.658			OG0001310	1		Hsap_XP_005257785.1
HyS0001.664	Hsap_NP_001347.3	300160	OG0000979	1	TRUE	Hsap_NP_001347.3
HyS0001.668	Hsap_NP_001334633.1	615403	OG0003340	1	TRUE	Hsap_NP_001334633.1
HyS0001.669	Hsap_NP_055670.1	613653	OG0005950	1	TRUE	Hsap_NP_055670.1
HyS0001.67			OG0000404	2		Hsap_NP_001101.1	Hsap_NP_003174.3
HyS0001.671	Hsap_NP_001222.3	114250	OG0006315	2	TRUE	Hsap_NP_001222.3	Hsap_NP_001223.2
HyS0001.674			OG0000659	1		Hsap_NP_001303969.1
HyS0001.678			OG0000027	7		Hsap_NP_000249.1	Hsap_NP_001292553.1	Hsap_NP_001305425.1	Hsap_NP_524144.1	Hsap_XP_006720321.1	Hsap_XP_011543483.1	Hsap_XP_016880172.1
HyS0001.682			OG0000072	5		Hsap_NP_000435.3	Hsap_NP_004817.2	Hsap_XP_005250050.1	Hsap_XP_011511158.1	Hsap_XP_011539174.1
HyS0001.687	Hsap_NP_001668.1	182330	OG0001076	1	TRUE	Hsap_NP_001668.1
HyS0001.688	Hsap_NP_001185728.1	614215	OG0005726	1	TRUE	Hsap_NP_001185728.1
HyS0001.704			OG0000767	1		Hsap_XP_016876625.1
HyS0001.712	Hsap_NP_663729.1	608918	OG0005005	1	TRUE	Hsap_NP_663729.1
HyS0001.72			OG0004000	3		Hsap_NP_000426.2	Hsap_NP_060087.3	Hsap_NP_077719.2
HyS0001.721			OG0000737	5		Hsap_NP_000065.1	Hsap_NP_000585.2	Hsap_NP_000630.1	Hsap_NP_001153212.1	Hsap_NP_003692.1
HyS0001.722			OG0003347	1		Hsap_NP_940916.2
HyS0001.73			OG0000400	2		Hsap_NP_758952.4	Hsap_XP_011532545.1
HyS0001.732			OG0000014	18		Hsap_NP_000450.2	Hsap_NP_001341913.1	Hsap_NP_002244.1	Hsap_NP_002520.2	Hsap_NP_004110.2	Hsap_NP_004551.2	Hsap_NP_005003.2	Hsap_NP_006171.2	Hsap_NP_006334.2	Hsap_NP_066124.1	Hsap_XP_005252051.1	Hsap_XP_005265227.2	Hsap_XP_006713931.1	Hsap_XP_006717771.1	Hsap_XP_011507889.1	Hsap_XP_011514525.1	Hsap_XP_011532780.1	Hsap_XP_011542745.1
HyS0001.735	Hsap_NP_001646.2	600820	OG0003203	1	TRUE	Hsap_NP_001646.2
HyS0001.743			OG0003246	1		Hsap_NP_001340896.1
HyS0001.744	Hsap_NP_004055.1	600778	OG0002151	2	TRUE	Hsap_NP_000067.1	Hsap_NP_004055.1
HyS0001.751	Hsap_XP_011532283.1	602431	OG0000078	6	TRUE	Hsap_NP_001230526.1	Hsap_NP_005206.2	Hsap_NP_055628.1	Hsap_NP_061928.4	Hsap_NP_071765.2	Hsap_XP_011532283.1
HyS0001.760	Hsap_XP_016876094.1	232000	OG0001142	2	TRUE	Hsap_NP_064551.3	Hsap_XP_016876094.1
HyS0001.77	Hsap_NP_705831.1	606978	OG0004121	1	TRUE	Hsap_NP_705831.1
HyS0001.79			OG0000776	1		Hsap_NP_055046.1
HyS0001.80			OG0000022	1		Hsap_NP_000321.1
HyS0001.82	Hsap_XP_011516423.1	604349	OG0000090	10	TRUE	Hsap_NP_001017402.1	Hsap_NP_001098676.2	Hsap_NP_005553.2	Hsap_XP_005265184.1	Hsap_XP_006721658.1	Hsap_XP_011516423.1	Hsap_XP_011523957.1	Hsap_XP_011524280.1	Hsap_XP_016866340.1	Hsap_XP_016867690.1
HyS0001.83			OG0000089	3		Hsap_NP_001978.1	Hsap_NP_002008.2	Hsap_NP_006485.2
HyS0001.85			OG0003032	1		Hsap_NP_060899.2
HyS0001.88			OG0006756	1		Hsap_NP_116222.4
HyS0001.89			OG0000051	3		Hsap_NP_004347.1	Hsap_NP_004606.2	Hsap_NP_620599.1
HyS0002.112			OG0000098	2		Hsap_NP_003623.1	Hsap_NP_054860.1
HyS0002.114	Hsap_NP_002632.1	311770	OG0003584	1	TRUE	Hsap_NP_002632.1
HyS0002.116	Hsap_NP_001026904.2	614585	OG0001367	1	TRUE	Hsap_NP_001026904.2
HyS0002.125			OG0000591	2		Hsap_NP_055613.1	Hsap_XP_006713890.1
HyS0002.136			OG0000910	1		Hsap_NP_000358.1
HyS0002.138			OG0000910	1		Hsap_NP_000358.1
HyS0002.141			OG0000910	1		Hsap_NP_000358.1
HyS0002.142			OG0000910	1		Hsap_NP_000358.1
HyS0002.147	Hsap_NP_001124506.1	612041	OG0004461	1	TRUE	Hsap_NP_001124506.1
HyS0002.16	Hsap_NP_002476.2	602667	OG0005935	1	TRUE	Hsap_NP_002476.2
HyS0002.164	Hsap_XP_011515855.1	608892	OG0002396	2	TRUE	Hsap_NP_001164100.1	Hsap_XP_011515855.1
HyS0002.173	Hsap_NP_009139.1	607118	OG0004051	1	TRUE	Hsap_NP_009139.1
HyS0002.178	Hsap_NP_004554.3	614095	OG0001791	2	TRUE	Hsap_NP_002582.3	Hsap_NP_004554.3
HyS0002.182			OG0000141	2		Hsap_NP_055085.1	Hsap_XP_011535601.1
HyS0002.183			OG0000141	2		Hsap_NP_055085.1	Hsap_XP_011535601.1
HyS0002.184	Hsap_NP_000261.2	164050	OG0002080	1	TRUE	Hsap_NP_000261.2
HyS0002.186	Hsap_NP_149975.1	610271	OG0004744	1	TRUE	Hsap_NP_149975.1
HyS0002.189	Hsap_XP_005260636.1	607976	OG0003407	1	TRUE	Hsap_XP_005260636.1
HyS0002.190			OG0000141	2		Hsap_NP_055085.1	Hsap_XP_011535601.1
HyS0002.193			OG0002678	1		Hsap_NP_001473.1
HyS0002.194			OG0002678	1		Hsap_NP_001473.1
HyS0002.195			OG0002678	1		Hsap_NP_001473.1
HyS0002.197			OG0002678	1		Hsap_NP_001473.1
HyS0002.204			OG0000070	4		Hsap_NP_001804.2	Hsap_NP_004514.2	Hsap_NP_036442.3	Hsap_XP_011519833.1
HyS0002.213			OG0000518	1		Hsap_NP_808807.2
HyS0002.216	Hsap_NP_004689.1	607301	OG0003644	1	TRUE	Hsap_NP_004689.1
HyS0002.217	Hsap_XP_005248399.1	600111	OG0000347	4	TRUE	Hsap_NP_003029.2	Hsap_XP_005248399.1	Hsap_XP_011516309.1	Hsap_XP_016873625.1
HyS0002.221	Hsap_XP_005251850.1	615370	OG0000674	2	TRUE	Hsap_XP_005251850.1	Hsap_XP_011538487.1
HyS0002.226	Hsap_XP_011521787.1	605584	OG0000179	1	TRUE	Hsap_XP_011521787.1
HyS0002.227	Hsap_XP_016856545.1	601176	OG0004240	1	TRUE	Hsap_XP_016856545.1
HyS0002.228			OG0000062	3		Hsap_NP_000288.1	Hsap_XP_016867287.1	Hsap_XP_024306066.1
HyS0002.232	Hsap_NP_000058.1	611492	OG0000123	5	TRUE	Hsap_NP_000058.1	Hsap_NP_001209.1	Hsap_NP_001308766.1	Hsap_XP_005257696.1	Hsap_XP_011521611.1
HyS0002.233			OG0000063	7		Hsap_NP_001177740.1	Hsap_NP_002130.2	Hsap_NP_004072.3	Hsap_NP_112533.1	Hsap_NP_112740.1	Hsap_XP_005268883.1	Hsap_XP_016856357.1
HyS0002.235	Hsap_XP_011539879.1	601791	OG0006470	1	TRUE	Hsap_XP_011539879.1
HyS0002.236	Hsap_NP_077025.2	612360	OG0004085	1	TRUE	Hsap_NP_077025.2
HyS0002.237	Hsap_NP_597700.1	138210	OG0001897	1	TRUE	Hsap_NP_597700.1
HyS0002.242			OG0000518	1		Hsap_NP_808807.2
HyS0002.243			OG0000151	4		Hsap_NP_000241.1	Hsap_NP_000493.1	Hsap_NP_036425.1	Hsap_XP_024308853.1
HyS0002.246			OG0000151	4		Hsap_NP_000241.1	Hsap_NP_000493.1	Hsap_NP_036425.1	Hsap_XP_024308853.1
HyS0002.247			OG0000151	4		Hsap_NP_000241.1	Hsap_NP_000493.1	Hsap_NP_036425.1	Hsap_XP_024308853.1
HyS0002.249			OG0000107	1		Hsap_NP_001937.2
HyS0002.251			OG0000009	3		Hsap_NP_150241.2	Hsap_XP_005251870.1	Hsap_XP_006714220.1
HyS0002.257			OG0000018	3		Hsap_NP_001295051.1	Hsap_NP_003050.2	Hsap_XP_006718493.1
HyS0002.258			OG0000018	3		Hsap_NP_001295051.1	Hsap_NP_003050.2	Hsap_XP_006718493.1
HyS0002.259			OG0000018	3		Hsap_NP_001295051.1	Hsap_NP_003050.2	Hsap_XP_006718493.1
HyS0002.26	Hsap_NP_005778.1	608750	OG0005370	1	TRUE	Hsap_NP_005778.1
HyS0002.261			OG0000098	2		Hsap_NP_003623.1	Hsap_NP_054860.1
HyS0002.262	Hsap_NP_789782.1	610897	OG0001972	1	TRUE	Hsap_NP_789782.1
HyS0002.266			OG0000179	1		Hsap_XP_011521787.1
HyS0002.267	Hsap_NP_002818.1	176885	OG0000020	10	TRUE	Hsap_NP_001317366.1	Hsap_NP_002818.1	Hsap_NP_002826.3	Hsap_NP_002829.3	Hsap_NP_057051.3	Hsap_NP_109592.1	Hsap_XP_005271136.1	Hsap_XP_016873572.1	Hsap_XP_016874762.1	Hsap_XP_024304527.1
HyS0002.269	Hsap_NP_149017.2	600374	OG0005290	1	TRUE	Hsap_NP_149017.2
HyS0002.275	Hsap_XP_011516851.1	603371	OG0004613	1	TRUE	Hsap_XP_011516851.1
HyS0002.276	Hsap_NP_001123561.1	601421	OG0002527	1	TRUE	Hsap_NP_001123561.1
HyS0002.277	Hsap_NP_598408.1	604878	OG0001676	2	TRUE	Hsap_NP_001128243.1	Hsap_NP_598408.1
HyS0002.278			OG0000098	2		Hsap_NP_003623.1	Hsap_NP_054860.1
HyS0002.283			OG0000910	1		Hsap_NP_000358.1
HyS0002.284	Hsap_NP_000358.1	187680	OG0000910	1	TRUE	Hsap_NP_000358.1
HyS0002.286	Hsap_XP_005267280.1	605042	OG0002473	1	TRUE	Hsap_XP_005267280.1
HyS0002.29	Hsap_NP_000476.1	102600	OG0002647	1	TRUE	Hsap_NP_000476.1
HyS0002.299			OG0000542	1		Hsap_NP_001129131.1
HyS0002.30			OG0000518	1		Hsap_NP_808807.2
HyS0002.306	Hsap_NP_003089.1	601017	OG0001446	1	TRUE	Hsap_NP_003089.1
HyS0002.311	Hsap_NP_003782.1	603355	OG0003260	1	TRUE	Hsap_NP_003782.1
HyS0002.319	Hsap_XP_011523401.1	607063	OG0010071	1	TRUE	Hsap_XP_011523401.1
HyS0002.320	Hsap_XP_011521284.1	612222	OG0000587	5	TRUE	Hsap_NP_001307680.1	Hsap_XP_011521284.1	Hsap_XP_011522839.1	Hsap_XP_016884289.1	Hsap_XP_016885014.1
HyS0002.322	Hsap_NP_000093.1	609300	OG0000017	11	TRUE	Hsap_NP_000093.1	Hsap_NP_000095.2	Hsap_NP_000097.3	Hsap_NP_000491.4	Hsap_NP_000753.3	Hsap_NP_000758.1	Hsap_NP_000760.1	Hsap_NP_000761.3	Hsap_NP_000762.2	Hsap_NP_078790.2	Hsap_XP_005262774.1
HyS0002.323	Hsap_NP_003277.1	126420	OG0002015	1	TRUE	Hsap_NP_003277.1
HyS0002.324	Hsap_NP_001013860.1	610859	OG0002394	1	TRUE	Hsap_NP_001013860.1
HyS0002.33	Hsap_NP_005844.4	606195	OG0000254	3	TRUE	Hsap_NP_005844.4	Hsap_NP_733775.1	Hsap_NP_733796.2
HyS0002.335			OG0000435	1		Hsap_NP_741995.1
HyS0002.336	Hsap_XP_005247411.1	604384	OG0002452	1	TRUE	Hsap_XP_005247411.1
HyS0002.344			OG0000107	1		Hsap_NP_001937.2
HyS0002.345	Hsap_NP_001035757.1	602438	OG0000867	1	TRUE	Hsap_NP_001035757.1
HyS0002.358			OG0000752	3		Hsap_NP_001036002.1	Hsap_NP_775924.1	Hsap_XP_016885394.1
HyS0002.36	Hsap_NP_000169.1	601002	OG0001492	1	TRUE	Hsap_NP_000169.1
HyS0002.360			OG0000553	1		Hsap_XP_024305442.1
HyS0002.362			OG0000047	10		Hsap_NP_001003841.1	Hsap_NP_001010898.1	Hsap_NP_001035.1	Hsap_NP_001036.1	Hsap_NP_004202.3	Hsap_NP_005620.1	Hsap_NP_064593.1	Hsap_NP_964012.2	Hsap_XP_005265468.1	Hsap_XP_011521597.1
HyS0002.368			OG0000047	10		Hsap_NP_001003841.1	Hsap_NP_001010898.1	Hsap_NP_001035.1	Hsap_NP_001036.1	Hsap_NP_004202.3	Hsap_NP_005620.1	Hsap_NP_064593.1	Hsap_NP_964012.2	Hsap_XP_005265468.1	Hsap_XP_011521597.1
HyS0002.37	Hsap_NP_683720.2	177046	OG0002462	1	TRUE	Hsap_NP_683720.2
HyS0002.375	Hsap_XP_016878673.1	611192	OG0005380	1	TRUE	Hsap_XP_016878673.1
HyS0002.380	Hsap_NP_006536.3	607072	OG0004179	1	TRUE	Hsap_NP_006536.3
HyS0002.381			OG0000014	18		Hsap_NP_000450.2	Hsap_NP_001341913.1	Hsap_NP_002244.1	Hsap_NP_002520.2	Hsap_NP_004110.2	Hsap_NP_004551.2	Hsap_NP_005003.2	Hsap_NP_006171.2	Hsap_NP_006334.2	Hsap_NP_066124.1	Hsap_XP_005252051.1	Hsap_XP_005265227.2	Hsap_XP_006713931.1	Hsap_XP_006717771.1	Hsap_XP_011507889.1	Hsap_XP_011514525.1	Hsap_XP_011532780.1	Hsap_XP_011542745.1
HyS0002.39			OG0000341	2		Hsap_NP_694591.2	Hsap_XP_011531792.1
HyS0002.394	Hsap_NP_000535.3	170261	OG0000345	2	TRUE	Hsap_NP_000535.3	Hsap_NP_000584.2
HyS0002.40	Hsap_XP_016878583.1	610937	OG0004535	2	TRUE	Hsap_NP_065099.3	Hsap_XP_016878583.1
HyS0002.402			OG0000004	4		Hsap_NP_001072.2	Hsap_NP_006120.1	Hsap_NP_036596.3	Hsap_NP_113621.1
HyS0002.406	Hsap_NP_004729.1	605704	OG0000691	1	TRUE	Hsap_NP_004729.1
HyS0002.407			OG0000045	10		Hsap_NP_000177.2	Hsap_NP_001006659.1	Hsap_NP_001287831.1	Hsap_NP_002104.2	Hsap_NP_055282.1	Hsap_NP_066303.2	Hsap_NP_758869.1	Hsap_XP_011507507.1	Hsap_XP_011507585.1	Hsap_XP_011508322.1
HyS0002.408	Hsap_NP_004544.1	603848	OG0004222	1	TRUE	Hsap_NP_004544.1
HyS0002.413			OG0000849	4		Hsap_NP_005351.2	Hsap_NP_005452.2	Hsap_NP_963883.2	Hsap_XP_011535103.2
HyS0002.42			OG0004535	2		Hsap_NP_065099.3	Hsap_XP_016878583.1
HyS0002.421	Hsap_NP_001139478.1	601489	OG0023424
HyS0002.427			OG0000151	4		Hsap_NP_000241.1	Hsap_NP_000493.1	Hsap_NP_036425.1	Hsap_XP_024308853.1
HyS0002.428	Hsap_NP_060666.1	300777	OG0000403	1	TRUE	Hsap_NP_060666.1
HyS0002.431			OG0000151	4		Hsap_NP_000241.1	Hsap_NP_000493.1	Hsap_NP_036425.1	Hsap_XP_024308853.1
HyS0002.438			OG0000141	2		Hsap_NP_055085.1	Hsap_XP_011535601.1
HyS0002.439			OG0000151	4		Hsap_NP_000241.1	Hsap_NP_000493.1	Hsap_NP_036425.1	Hsap_XP_024308853.1
HyS0002.44			OG0000024	2		Hsap_NP_001138724.1	Hsap_NP_114141.2
HyS0002.440			OG0001615	1		Hsap_NP_068780.2
HyS0002.442	Hsap_NP_001596.2	601065	OG0001429	2	TRUE	Hsap_NP_001596.2	Hsap_NP_065796.1
HyS0002.446	Hsap_NP_004073.2	601143	OG0000187	1	TRUE	Hsap_NP_004073.2
HyS0002.447			OG0001209	1		Hsap_NP_057090.2
HyS0002.448	Hsap_NP_057090.2	604780	OG0001209	1	TRUE	Hsap_NP_057090.2
HyS0002.45			OG0000520	3		Hsap_NP_001027565.1	Hsap_NP_001185767.1	Hsap_NP_060167.2
HyS0002.451	Hsap_NP_001139248.1	602623	OG0000235	2	TRUE	Hsap_NP_001139248.1	Hsap_NP_060416.1
HyS0002.452	Hsap_XP_006713078.1	613169	OG0006719	1	TRUE	Hsap_XP_006713078.1
HyS0002.453	Hsap_NP_004228.1	604507	OG0004577	1	TRUE	Hsap_NP_004228.1
HyS0002.458			OG0000226	4		Hsap_XP_005263430.1	Hsap_XP_011530059.1	Hsap_XP_011542334.1	Hsap_XP_016861499.1
HyS0002.46	Hsap_NP_060676.2	601501	OG0003542	1	TRUE	Hsap_NP_060676.2
HyS0002.461			OG0000151	4		Hsap_NP_000241.1	Hsap_NP_000493.1	Hsap_NP_036425.1	Hsap_XP_024308853.1
HyS0002.468			OG0000087	1		Hsap_NP_057370.1
HyS0002.470			OG0001085	1		Hsap_NP_002070.1
HyS0002.490	Hsap_NP_001245325.1	614677	OG0006296	1	TRUE	Hsap_NP_001245325.1
HyS0002.492			OG0000080	11		Hsap_NP_000337.1	Hsap_NP_001291744.1	Hsap_NP_003097.1	Hsap_NP_003098.1	Hsap_NP_003099.1	Hsap_NP_003131.1	Hsap_NP_005625.2	Hsap_NP_008872.1	Hsap_NP_060889.1	Hsap_NP_071899.1	Hsap_XP_016875377.1
HyS0002.494	Hsap_XP_011514672.1	612074	OG0003771	1	TRUE	Hsap_XP_011514672.1
HyS0002.511			OG0000011	11		Hsap_NP_001157814.1	Hsap_NP_001316524.1	Hsap_NP_001336347.1	Hsap_NP_005997.2	Hsap_NP_006054.2	Hsap_NP_055612.2	Hsap_NP_059111.2	Hsap_NP_071324.1	Hsap_NP_085127.2	Hsap_NP_689606.2	Hsap_XP_006715816.1
HyS0002.512			OG0000710	2		Hsap_NP_001029366.1	Hsap_XP_006719826.1
HyS0002.516			OG0000134	4		Hsap_NP_001186326.1	Hsap_NP_001316166.1	Hsap_NP_002488.1	Hsap_XP_011522940.1
HyS0002.517			OG0000134	4		Hsap_NP_001186326.1	Hsap_NP_001316166.1	Hsap_NP_002488.1	Hsap_XP_011522940.1
HyS0002.518			OG0000134	4		Hsap_NP_001186326.1	Hsap_NP_001316166.1	Hsap_NP_002488.1	Hsap_XP_011522940.1
HyS0002.532			OG0001102	1		Hsap_NP_000220.1
HyS0002.543	Hsap_XP_016868591.1	123980	OG0004198	1	TRUE	Hsap_XP_016868591.1
HyS0002.547	Hsap_XP_006711812.1	610194	OG0006306	1	TRUE	Hsap_XP_006711812.1
HyS0002.55	Hsap_NP_004706.3	604927	OG0003276	1	TRUE	Hsap_NP_004706.3
HyS0002.550			OG0002427	1		Hsap_NP_001010892.1
HyS0002.554			OG0001887	2		Hsap_NP_001274353.1	Hsap_NP_001796.2
HyS0002.570	Hsap_NP_057107.3	612021	OG0003619	1	TRUE	Hsap_NP_057107.3
HyS0002.571			OG0003468	1		Hsap_NP_000344.1
HyS0002.577			OG0000656	1		Hsap_NP_005189.2
HyS0002.581	Hsap_NP_001280654.1	601689	OG0002386	1	TRUE	Hsap_NP_001280654.1
HyS0002.59			OG0000007	12		Hsap_NP_000015.1	Hsap_NP_000016.1	Hsap_NP_000515.2	Hsap_NP_000612.1	Hsap_NP_000673.2	Hsap_NP_000674.2	Hsap_NP_000675.1	Hsap_NP_000788.2	Hsap_NP_000789.1	Hsap_NP_001277738.1	Hsap_NP_473362.1	Hsap_XP_016855642.1
HyS0002.60	Hsap_XP_016883523.1	603072	OG0002130	2	TRUE	Hsap_NP_001015878.1	Hsap_XP_016883523.1
HyS0002.61	Hsap_NP_942581.1	617387	OG0000214	1	TRUE	Hsap_NP_942581.1
HyS0002.62	Hsap_XP_005256320.1	614351	OG0002907	1	TRUE	Hsap_XP_005256320.1
HyS0002.63	Hsap_NP_694545.1	607479	OG0006348	1	TRUE	Hsap_NP_694545.1
HyS0002.67	Hsap_NP_001244066.1	606409	OG0000370	3	TRUE	Hsap_NP_001244066.1	Hsap_XP_006712709.1	Hsap_XP_006722489.1
HyS0002.70			OG0005240	1		Hsap_XP_024307502.1
HyS0002.75	Hsap_NP_001276718.1	172400	OG0002648	1	TRUE	Hsap_NP_001276718.1
HyS0002.76	Hsap_NP_005693.1	607435	OG0004691	1	TRUE	Hsap_NP_005693.1
HyS0002.78			OG0000004	4		Hsap_NP_001072.2	Hsap_NP_006120.1	Hsap_NP_036596.3	Hsap_NP_113621.1
HyS0002.79			OG0000270	1		Hsap_NP_006199.2
HyS0002.82			OG0000375	2		Hsap_NP_001120.3	Hsap_NP_001299.1
HyS0002.85			OG0000375	2		Hsap_NP_001120.3	Hsap_NP_001299.1
HyS0002.86			OG0000011	11		Hsap_NP_001157814.1	Hsap_NP_001316524.1	Hsap_NP_001336347.1	Hsap_NP_005997.2	Hsap_NP_006054.2	Hsap_NP_055612.2	Hsap_NP_059111.2	Hsap_NP_071324.1	Hsap_NP_085127.2	Hsap_NP_689606.2	Hsap_XP_006715816.1
HyS0002.87			OG0000015	4		Hsap_NP_000768.1	Hsap_NP_001159725.1	Hsap_NP_775754.2	Hsap_NP_997235.3
HyS0002.88			OG0000015	4		Hsap_NP_000768.1	Hsap_NP_001159725.1	Hsap_NP_775754.2	Hsap_NP_997235.3
HyS0002.95	Hsap_NP_004996.1	601445	OG0005217	1	TRUE	Hsap_NP_004996.1
HyS0003.1			OG0000154	2		Hsap_NP_000592.3	Hsap_NP_005568.2
HyS0003.100			OG0000810	1		Hsap_NP_872354.1
HyS0003.109	Hsap_XP_005254998.1	610350	OG0006981	1	TRUE	Hsap_XP_005254998.1
HyS0003.111			OG0000478	2		Hsap_NP_036462.2	Hsap_XP_011542958.1
HyS0003.122	Hsap_NP_001338457.1	608465	OG0000522	1	TRUE	Hsap_NP_001338457.1
HyS0003.123	Hsap_NP_005600.1	608455	OG0001893	2	TRUE	Hsap_NP_002854.3	Hsap_NP_005600.1
HyS0003.131			OG0000105	1		Hsap_XP_016881046.1
HyS0003.132			OG0000165	4		Hsap_NP_001230937.1	Hsap_NP_006603.2	Hsap_NP_055690.1	Hsap_NP_055889.2
HyS0003.135	Hsap_XP_016881716.1	615620	OG0005211	1	TRUE	Hsap_XP_016881716.1
HyS0003.139			OG0000009	3		Hsap_NP_150241.2	Hsap_XP_005251870.1	Hsap_XP_006714220.1
HyS0003.140			OG0000491	1		Hsap_NP_065825.1
HyS0003.142	Hsap_NP_002063.2	600998	OG0000198	7	TRUE	Hsap_NP_002058.2	Hsap_NP_002061.1	Hsap_NP_002063.2	Hsap_NP_005263.1	Hsap_NP_006487.1	Hsap_NP_620073.2	Hsap_NP_653082.1
HyS0003.148	Hsap_NP_000782.1	126060	OG0002461	1	TRUE	Hsap_NP_000782.1
HyS0003.154	Hsap_NP_078961.3	610148	OG0007549	1	TRUE	Hsap_NP_078961.3
HyS0003.16			OG0001413	1		Hsap_XP_024302667.1
HyS0003.161			OG0000068	1		Hsap_NP_001243339.1
HyS0003.166			OG0007571	1		Hsap_XP_011535140.1
HyS0003.168			OG0000235	2		Hsap_NP_001139248.1	Hsap_NP_060416.1
HyS0003.169			OG0000880	1		Hsap_XP_016859245.1
HyS0003.170	Hsap_NP_001166216.1	610512	OG0002959	2	TRUE	Hsap_NP_001166216.1	Hsap_XP_005267319.1
HyS0003.171			OG0000033	3		Hsap_NP_000834.2	Hsap_NP_001171536.1	Hsap_XP_011534084.1
HyS0003.179	Hsap_NP_919424.1	600024	OG0001100	2	TRUE	Hsap_NP_001157289.1	Hsap_NP_919424.1
HyS0003.180			OG0001100	2		Hsap_NP_001157289.1	Hsap_NP_919424.1
HyS0003.183	Hsap_XP_005274240.1	611729	OG0001896	1	TRUE	Hsap_XP_005274240.1
HyS0003.186			OG0000027	7		Hsap_NP_000249.1	Hsap_NP_001292553.1	Hsap_NP_001305425.1	Hsap_NP_524144.1	Hsap_XP_006720321.1	Hsap_XP_011543483.1	Hsap_XP_016880172.1
HyS0003.193	Hsap_NP_006236.1	601646	OG0001088	1	TRUE	Hsap_NP_006236.1
HyS0003.202	Hsap_NP_694591.2	617963	OG0000341	2	TRUE	Hsap_NP_694591.2	Hsap_XP_011531792.1
HyS0003.203			OG0001930	1		Hsap_NP_003721.2
HyS0003.205			OG0000154	2		Hsap_NP_000592.3	Hsap_NP_005568.2
HyS0003.213			OG0000154	2		Hsap_NP_000592.3	Hsap_NP_005568.2
HyS0003.216			OG0000154	2		Hsap_NP_000592.3	Hsap_NP_005568.2
HyS0003.218			OG0000154	2		Hsap_NP_000592.3	Hsap_NP_005568.2
HyS0003.220	Hsap_NP_996816.2	608400	OG0002913	1	TRUE	Hsap_NP_996816.2
HyS0003.223			OG0000342	1		Hsap_XP_024305105.1
HyS0003.224	Hsap_NP_055659.2	615000	OG0001524	2	TRUE	Hsap_NP_055659.2	Hsap_XP_011518165.1
HyS0003.228	Hsap_NP_005973.1	601205	OG0000546	4	TRUE	Hsap_NP_005404.1	Hsap_NP_005973.1	Hsap_NP_031400.2	Hsap_NP_787071.2
HyS0003.229	Hsap_XP_011542496.1	156570	OG0002800	1	TRUE	Hsap_XP_011542496.1
HyS0003.230			OG0000069	3		Hsap_NP_005870.2	Hsap_NP_899196.1	Hsap_NP_899237.1
HyS0003.231	Hsap_XP_024307442.1	147141	OG0002357	3	TRUE	Hsap_NP_001230155.2	Hsap_XP_011520262.1	Hsap_XP_024307442.1
HyS0003.232	Hsap_NP_001299801.1	614698	OG0007472	1	TRUE	Hsap_NP_001299801.1
HyS0003.234	Hsap_NP_057501.2	609588	OG0004610	1	TRUE	Hsap_NP_057501.2
HyS0003.238			OG0000265	3		Hsap_NP_006006.3	Hsap_NP_689854.2	Hsap_XP_011534286.2
HyS0003.239	Hsap_NP_976035.1	610060	OG0003946	1	TRUE	Hsap_NP_976035.1
HyS0003.241	Hsap_XP_024303484.1	604296	OG0000564	2	TRUE	Hsap_XP_011539528.1	Hsap_XP_024303484.1
HyS0003.244	Hsap_NP_001454.2	605083	OG0000188	5	TRUE	Hsap_NP_001158087.1	Hsap_NP_001454.2	Hsap_NP_001457.1	Hsap_NP_003005.2	Hsap_NP_036325.2
HyS0003.246			OG0000322	2		Hsap_XP_006716091.1	Hsap_XP_016869431.1
HyS0003.248	Hsap_NP_009008.2	607243	OG0000681	5	TRUE	Hsap_NP_001034658.1	Hsap_NP_001274.1	Hsap_NP_009008.2	Hsap_XP_011524725.1	Hsap_XP_016885414.1
HyS0003.250			OG0000004	4		Hsap_NP_001072.2	Hsap_NP_006120.1	Hsap_NP_036596.3	Hsap_NP_113621.1
HyS0003.251			OG0000004	4		Hsap_NP_001072.2	Hsap_NP_006120.1	Hsap_NP_036596.3	Hsap_NP_113621.1
HyS0003.257	Hsap_NP_001019195.1	600225	OG0004302	1	TRUE	Hsap_NP_001019195.1
HyS0003.259	Hsap_XP_011524424.1	615068	OG0001922	1	TRUE	Hsap_XP_011524424.1
HyS0003.262			OG0000011	11		Hsap_NP_001157814.1	Hsap_NP_001316524.1	Hsap_NP_001336347.1	Hsap_NP_005997.2	Hsap_NP_006054.2	Hsap_NP_055612.2	Hsap_NP_059111.2	Hsap_NP_071324.1	Hsap_NP_085127.2	Hsap_NP_689606.2	Hsap_XP_006715816.1
HyS0003.263			OG0005347	1		Hsap_NP_065184.2
HyS0003.264	Hsap_NP_065184.2	606210	OG0005347	1	TRUE	Hsap_NP_065184.2
HyS0003.266	Hsap_NP_000438.2	600759	OG0003208	2	TRUE	Hsap_NP_000438.2	Hsap_XP_011535274.1
HyS0003.268	Hsap_NP_005561.1	601567	OG0001221	2	TRUE	Hsap_NP_001135764.1	Hsap_NP_005561.1
HyS0003.275	Hsap_NP_001116427.1	606158	OG0005129	1	TRUE	Hsap_NP_001116427.1
HyS0003.281	Hsap_NP_001879.1	123740	OG0004437	1	TRUE	Hsap_NP_001879.1
HyS0003.283			OG0000268	2		Hsap_NP_004454.2	Hsap_XP_005253361.1
HyS0003.284			OG0000553	1		Hsap_XP_024305442.1
HyS0003.285			OG0000024	2		Hsap_NP_001138724.1	Hsap_NP_114141.2
HyS0003.289			OG0000379	1		Hsap_NP_055555.1
HyS0003.294	Hsap_NP_055555.1	608546	OG0000379	1	TRUE	Hsap_NP_055555.1
HyS0003.295	Hsap_NP_001337615.1	604214	OG0002418	1	TRUE	Hsap_NP_001337615.1
HyS0003.30	Hsap_NP_061176.3	614984	OG0000958	2	TRUE	Hsap_NP_061176.3	Hsap_XP_005249816.1
HyS0003.301			OG0009121	1		Hsap_NP_001180303.1
HyS0003.305	Hsap_XP_005268103.1	600675	OG0000357	4	TRUE	Hsap_NP_001136043.1	Hsap_NP_001157741.1	Hsap_XP_005268103.1	Hsap_XP_006722064.1
HyS0003.308	Hsap_XP_005273283.1	608832	OG0001234	1	TRUE	Hsap_XP_005273283.1
HyS0003.309			OG0000025	3		Hsap_NP_001030.2	Hsap_NP_001153048.1	Hsap_XP_016879014.1
HyS0003.310			OG0009121	1		Hsap_NP_001180303.1
HyS0003.313	Hsap_NP_060417.3	613274	OG0001453
HyS0003.320			OG0000105	1		Hsap_XP_016881046.1
HyS0003.329	Hsap_NP_659451.1	610693	OG0006100	1	TRUE	Hsap_NP_659451.1
HyS0003.331	Hsap_NP_005350.1	600993	OG0001955	1	TRUE	Hsap_NP_005350.1
HyS0003.34			OG0000025	3		Hsap_NP_001030.2	Hsap_NP_001153048.1	Hsap_XP_016879014.1
HyS0003.340			OG0000154	2		Hsap_NP_000592.3	Hsap_NP_005568.2
HyS0003.347	Hsap_NP_938149.2	104160	OG0002602	1	TRUE	Hsap_NP_938149.2
HyS0003.349			OG0000212	2		Hsap_NP_004264.2	Hsap_NP_067628.1
HyS0003.353			OG0000057	4		Hsap_NP_001304019.1	Hsap_NP_002237.1	Hsap_NP_862823.1	Hsap_XP_011515403.1
HyS0003.355	Hsap_NP_689494.2	607983	OG0006728	1	TRUE	Hsap_NP_689494.2
HyS0003.361	Hsap_NP_079160.1	609584	OG0002788	1	TRUE	Hsap_NP_079160.1
HyS0003.362	Hsap_NP_005610.1	603183	OG0001617	1	TRUE	Hsap_NP_005610.1
HyS0003.365			OG0003703	1		Hsap_NP_000542.1
HyS0003.37			OG0000025	3		Hsap_NP_001030.2	Hsap_NP_001153048.1	Hsap_XP_016879014.1
HyS0003.372	Hsap_NP_003115.1	182125	OG0002183	1	TRUE	Hsap_NP_003115.1
HyS0003.374			OG0001088	1		Hsap_NP_006236.1
HyS0003.376	Hsap_NP_001122080.1	616786	OG0002288	2	TRUE	Hsap_NP_001077430.1	Hsap_NP_001122080.1
HyS0003.378			OG0000045	10		Hsap_NP_000177.2	Hsap_NP_001006659.1	Hsap_NP_001287831.1	Hsap_NP_002104.2	Hsap_NP_055282.1	Hsap_NP_066303.2	Hsap_NP_758869.1	Hsap_XP_011507507.1	Hsap_XP_011507585.1	Hsap_XP_011508322.1
HyS0003.384			OG0000011	11		Hsap_NP_001157814.1	Hsap_NP_001316524.1	Hsap_NP_001336347.1	Hsap_NP_005997.2	Hsap_NP_006054.2	Hsap_NP_055612.2	Hsap_NP_059111.2	Hsap_NP_071324.1	Hsap_NP_085127.2	Hsap_NP_689606.2	Hsap_XP_006715816.1
HyS0003.385			OG0000105	1		Hsap_XP_016881046.1
HyS0003.392	Hsap_NP_001010892.1	612647	OG0002427	1	TRUE	Hsap_NP_001010892.1
HyS0003.401	Hsap_NP_114434.3	609898	OG0000543	1	TRUE	Hsap_NP_114434.3
HyS0003.414			OG0000133	3		Hsap_NP_005621.2	Hsap_NP_006437.3	Hsap_NP_062818.1
HyS0003.417			OG0000003	12		Hsap_NP_000570.1	Hsap_NP_000625.1	Hsap_NP_001050.1	Hsap_NP_001116513.2	Hsap_NP_001155969.1	Hsap_NP_001164645.1	Hsap_NP_001166031.1	Hsap_NP_001334985.1	Hsap_NP_004826.5	Hsap_NP_115940.2	Hsap_NP_940799.1	Hsap_XP_011515565.1
HyS0003.420			OG0000269	2		Hsap_NP_001121620.1	Hsap_XP_016868062.1
HyS0003.423			OG0000040	5		Hsap_NP_000383.1	Hsap_XP_011518847.1	Hsap_XP_016873686.1	Hsap_XP_016879285.1	Hsap_XP_024306029.1
HyS0003.424			OG0000150	4		Hsap_NP_001035982.1	Hsap_NP_006720.1	Hsap_XP_016877084.1	Hsap_XP_024310152.1
HyS0003.425			OG0000047	10		Hsap_NP_001003841.1	Hsap_NP_001010898.1	Hsap_NP_001035.1	Hsap_NP_001036.1	Hsap_NP_004202.3	Hsap_NP_005620.1	Hsap_NP_064593.1	Hsap_NP_964012.2	Hsap_XP_005265468.1	Hsap_XP_011521597.1
HyS0003.428			OG0000030	1		Hsap_XP_016877107.1
HyS0003.433	Hsap_NP_060295.1	610624	OG0004370	1	TRUE	Hsap_NP_060295.1
HyS0003.435	Hsap_NP_001001563.1	607381	OG0004208	1	TRUE	Hsap_NP_001001563.1
HyS0003.436			OG0000342	1		Hsap_XP_024305105.1
HyS0003.439	Hsap_XP_024305105.1	604490	OG0000342	1	TRUE	Hsap_XP_024305105.1
HyS0003.445	Hsap_NP_036348.2	300204	OG0001040	3	TRUE	Hsap_NP_001092094.1	Hsap_NP_036348.2	Hsap_XP_016865110.1
HyS0003.446	Hsap_XP_016883594.1	608187	OG0005054	1	TRUE	Hsap_XP_016883594.1
HyS0003.447	Hsap_XP_005252123.1	600529	OG0004688	1	TRUE	Hsap_XP_005252123.1
HyS0003.46	Hsap_NP_001075.1	603066	OG0002135	3	TRUE	Hsap_NP_001075.1	Hsap_NP_001303249.1	Hsap_NP_891988.1
HyS0003.460			OG0001740	1		Hsap_NP_002970.2
HyS0003.461			OG0000055	5		Hsap_NP_001264055.1	Hsap_NP_004886.3	Hsap_NP_071445.1	Hsap_XP_006720943.2	Hsap_XP_011524898.1
HyS0003.463	Hsap_XP_024305316.1	603758	OG0002425	1	TRUE	Hsap_XP_024305316.1
HyS0003.47	Hsap_NP_001303249.1	153454	OG0002135	3	TRUE	Hsap_NP_001075.1	Hsap_NP_001303249.1	Hsap_NP_891988.1
HyS0003.470			OG0000147	4		Hsap_NP_005991.1	Hsap_NP_006000.2	Hsap_NP_061816.1	Hsap_NP_525125.2
HyS0003.475	Hsap_NP_001010898.1	610299	OG0000047	10	TRUE	Hsap_NP_001003841.1	Hsap_NP_001010898.1	Hsap_NP_001035.1	Hsap_NP_001036.1	Hsap_NP_004202.3	Hsap_NP_005620.1	Hsap_NP_064593.1	Hsap_NP_964012.2	Hsap_XP_005265468.1	Hsap_XP_011521597.1
HyS0003.476			OG0000134	4		Hsap_NP_001186326.1	Hsap_NP_001316166.1	Hsap_NP_002488.1	Hsap_XP_011522940.1
HyS0003.486			OG0000115	3		Hsap_NP_001073594.1	Hsap_NP_036246.1	Hsap_NP_116759.2
HyS0003.49	Hsap_NP_037451.1	611632	OG0005738	1	TRUE	Hsap_NP_037451.1
HyS0003.491	Hsap_NP_003721.2	612944	OG0001930	1	TRUE	Hsap_NP_003721.2
HyS0003.492	Hsap_NP_005624.2	182530	OG0001584	2	TRUE	Hsap_NP_005624.2	Hsap_NP_008870.2
HyS0003.496			OG0000048	4		Hsap_NP_075044.2	Hsap_NP_612808.1	Hsap_XP_011529322.1	Hsap_XP_016866294.1
HyS0003.5			OG0000012	8		Hsap_NP_001242914.1	Hsap_NP_006429.2	Hsap_NP_055072.3	Hsap_NP_056532.4	Hsap_NP_066978.1	Hsap_NP_922938.1	Hsap_XP_005270185.1	Hsap_XP_011538118.1
HyS0003.50			OG0000050	1		Hsap_NP_001336091.1
HyS0003.504			OG0000314	2		Hsap_NP_000229.1	Hsap_NP_758872.1
HyS0003.506	Hsap_NP_001337177.1	613524	OG0001999	1	TRUE	Hsap_NP_001337177.1
HyS0003.507	Hsap_XP_016873357.1	608786	OG0002556	1	TRUE	Hsap_XP_016873357.1
HyS0003.508			OG0000030	1		Hsap_XP_016877107.1
HyS0003.51			OG0000050	1		Hsap_NP_001336091.1
HyS0003.511			OG0000836	1		Hsap_NP_620714.2
HyS0003.512	Hsap_XP_011526147.1	606102	OG0000602	1	TRUE	Hsap_XP_011526147.1
HyS0003.513	Hsap_XP_011534642.1	603930	OG0003223	1	TRUE	Hsap_XP_011534642.1
HyS0003.518			OG0000030	1		Hsap_XP_016877107.1
HyS0003.519			OG0000030	1		Hsap_XP_016877107.1
HyS0003.521	Hsap_NP_001924.2	126063	OG0002933	1	TRUE	Hsap_NP_001924.2
HyS0003.522	Hsap_NP_114407.3	616086	OG0002365	1	TRUE	Hsap_NP_114407.3
HyS0003.526			OG0000094	8		Hsap_NP_055058.2	Hsap_NP_055059.2	Hsap_NP_112219.3	Hsap_NP_620594.1	Hsap_NP_955387.1	Hsap_XP_005272294.1	Hsap_XP_011507946.1	Hsap_XP_016877462.1
HyS0003.528			OG0000045	10		Hsap_NP_000177.2	Hsap_NP_001006659.1	Hsap_NP_001287831.1	Hsap_NP_002104.2	Hsap_NP_055282.1	Hsap_NP_066303.2	Hsap_NP_758869.1	Hsap_XP_011507507.1	Hsap_XP_011507585.1	Hsap_XP_011508322.1
HyS0003.530	Hsap_NP_149353.1	600483	OG0002013	2	TRUE	Hsap_NP_149353.1	Hsap_XP_005273732.1
HyS0003.531			OG0000242	5		Hsap_NP_000385.1	Hsap_NP_001276736.1	Hsap_NP_001531.1	Hsap_NP_006299.1	Hsap_NP_055180.1
HyS0003.532			OG0000622	1		Hsap_XP_024308542.1
HyS0003.533			OG0000242	5		Hsap_NP_000385.1	Hsap_NP_001276736.1	Hsap_NP_001531.1	Hsap_NP_006299.1	Hsap_NP_055180.1
HyS0003.534	Hsap_XP_024308542.1	604521	OG0000622	1	TRUE	Hsap_XP_024308542.1
HyS0003.549			OG0000418	6		Hsap_NP_006500.2	Hsap_NP_065390.1	Hsap_NP_068810.3	Hsap_XP_011525500.2	Hsap_XP_016871767.1	Hsap_XP_024309835.1
HyS0003.550	Hsap_NP_000700.1	608348	OG0003309	1	TRUE	Hsap_NP_000700.1
HyS0003.551	Hsap_NP_061969.3	607434	OG0001400	1	TRUE	Hsap_NP_061969.3
HyS0003.556			OG0000050	1		Hsap_NP_001336091.1
HyS0003.557	Hsap_NP_899057.1	603868	OG0004775	1	TRUE	Hsap_NP_899057.1
HyS0003.563	Hsap_NP_001231367.1	608313	OG0003207	1	TRUE	Hsap_NP_001231367.1
HyS0003.567			OG0000031	14		Hsap_NP_001231739.1	Hsap_NP_001442.2	Hsap_NP_001444.2	Hsap_NP_002006.2	Hsap_NP_004464.2	Hsap_NP_005240.3	Hsap_NP_005242.1	Hsap_NP_036315.1	Hsap_NP_036318.1	Hsap_NP_036320.2	Hsap_NP_075555.1	Hsap_XP_011523661.1	Hsap_XP_016868290.1	Hsap_XP_016885056.1
HyS0003.568			OG0000057	4		Hsap_NP_001304019.1	Hsap_NP_002237.1	Hsap_NP_862823.1	Hsap_XP_011515403.1
HyS0003.571	Hsap_NP_005636.1	600774	OG0005289	1	TRUE	Hsap_NP_005636.1
HyS0003.575	Hsap_NP_005092.1	147571	OG0000181	1	TRUE	Hsap_NP_005092.1
HyS0003.577			OG0000345	2		Hsap_NP_000535.3	Hsap_NP_000584.2
HyS0003.58			OG0000622	1		Hsap_XP_024308542.1
HyS0003.63	Hsap_NP_872282.1	614647	OG0002965	1	TRUE	Hsap_NP_872282.1
HyS0003.68			OG0000622	1		Hsap_XP_024308542.1
HyS0003.73			OG0002965	1		Hsap_NP_872282.1
HyS0003.78	Hsap_XP_011508150.1	601863	OG0006249	1	TRUE	Hsap_XP_011508150.1
HyS0003.80	Hsap_NP_001275710.1	608132	OG0004657	1	TRUE	Hsap_NP_001275710.1
HyS0003.84	Hsap_NP_077288.2	607840	OG0004954	1	TRUE	Hsap_NP_077288.2
HyS0003.91			OG0000539	1		Hsap_NP_861448.2
HyS0003.95	Hsap_NP_055440.1	604766	OG0000414	1	TRUE	Hsap_NP_055440.1
HyS0003.96			OG0000414	1		Hsap_NP_055440.1
HyS0003.97			OG0000414	1		Hsap_NP_055440.1
HyS0003.98	Hsap_NP_004230.2	604505	OG0003209	1	TRUE	Hsap_NP_004230.2
HyS0003.99			OG0003209	1		Hsap_NP_004230.2
HyS0004.100			OG0001722	2		Hsap_NP_005267.2	Hsap_NP_055956.1
HyS0004.104	Hsap_XP_006713397.1	607182	OG0004235	1	TRUE	Hsap_XP_006713397.1
HyS0004.106			OG0000227	1		Hsap_NP_065094.3
HyS0004.109	Hsap_NP_001245282.1	603892	OG0002953	1	TRUE	Hsap_NP_001245282.1
HyS0004.111	Hsap_XP_016868239.1	603309	OG0000161	4	TRUE	Hsap_NP_000066.1	Hsap_NP_001138778.1	Hsap_NP_004926.1	Hsap_XP_016868239.1
HyS0004.114	Hsap_NP_054860.1	604569	OG0000098	2	TRUE	Hsap_NP_003623.1	Hsap_NP_054860.1
HyS0004.115	Hsap_NP_001303969.1	611458	OG0000659	1	TRUE	Hsap_NP_001303969.1
HyS0004.119	Hsap_XP_005246506.1	601756	OG0000102	2	TRUE	Hsap_NP_078918.3	Hsap_XP_005246506.1
HyS0004.123	Hsap_NP_001138778.1	603368	OG0000161	4	TRUE	Hsap_NP_000066.1	Hsap_NP_001138778.1	Hsap_NP_004926.1	Hsap_XP_016868239.1
HyS0004.125	Hsap_NP_612435.1	614283	OG0005324	1	TRUE	Hsap_NP_612435.1
HyS0004.126			OG0000052	3		Hsap_XP_006711325.1	Hsap_XP_011537012.1	Hsap_XP_016855798.1
HyS0004.127	Hsap_NP_001970.2	132811	OG0001582	1	TRUE	Hsap_NP_001970.2
HyS0004.128			OG0001582	1		Hsap_NP_001970.2
HyS0004.129	Hsap_NP_009231.2	113705	OG0000954	3	TRUE	Hsap_NP_009231.2	Hsap_XP_016860102.1	Hsap_XP_016869318.1
HyS0004.136	Hsap_NP_001337882.1	605522	OG0003843	1	TRUE	Hsap_NP_001337882.1
HyS0004.139	Hsap_NP_001005781.1	601912	OG0001020	2	TRUE	Hsap_NP_001002255.1	Hsap_NP_001005781.1
HyS0004.144	Hsap_NP_291028.3	608679	OG0005398	1	TRUE	Hsap_NP_291028.3
HyS0004.146	Hsap_XP_011527896.1	605925	OG0005312	2	TRUE	Hsap_XP_011527896.1	Hsap_XP_016867131.1
HyS0004.151	Hsap_NP_001243463.1	190315	OG0003058	1	TRUE	Hsap_NP_001243463.1
HyS0004.157	Hsap_NP_001072.2	602997	OG0000004	4	TRUE	Hsap_NP_001072.2	Hsap_NP_006120.1	Hsap_NP_036596.3	Hsap_NP_113621.1
HyS0004.159			OG0000004	4		Hsap_NP_001072.2	Hsap_NP_006120.1	Hsap_NP_036596.3	Hsap_NP_113621.1
HyS0004.160			OG0003945	1		Hsap_NP_001020114.1
HyS0004.167			OG0000008	20		Hsap_NP_000200.1	Hsap_NP_001073136.1	Hsap_NP_001106175.1	Hsap_NP_001129743.2	Hsap_NP_001180.1	Hsap_NP_002135.2	Hsap_NP_002139.2	Hsap_NP_002439.2	Hsap_NP_002440.2	Hsap_NP_004089.1	Hsap_NP_004378.1	Hsap_NP_004518.1	Hsap_NP_005211.1	Hsap_NP_005212.1	Hsap_NP_005506.3	Hsap_NP_005513.1	Hsap_NP_006726.1	Hsap_NP_061815.2	Hsap_NP_612138.1	Hsap_XP_016872278.1
HyS0004.173			OG0000322	2		Hsap_XP_006716091.1	Hsap_XP_016869431.1
HyS0004.176	Hsap_NP_005906.2	601806	OG0003063	1	TRUE	Hsap_NP_005906.2
HyS0004.177			OG0000446	1		Hsap_XP_011519666.1
HyS0004.178			OG0000350	1		Hsap_NP_004989.2
HyS0004.179	Hsap_NP_060844.2	613413	OG0003481	1	TRUE	Hsap_NP_060844.2
HyS0004.18			OG0000867	1		Hsap_NP_001035757.1
HyS0004.180	Hsap_NP_001195.2	600799	OG0000311	10	TRUE	Hsap_NP_001020018.1	Hsap_NP_001070869.1	Hsap_NP_001195.2	Hsap_NP_001243722.1	Hsap_NP_001293139.1	Hsap_NP_001334595.1	Hsap_NP_064733.3	Hsap_XP_005265640.1	Hsap_XP_011536475.1	Hsap_XP_011538406.1
HyS0004.181			OG0000196	12		Hsap_NP_000176.2	Hsap_NP_000479.1	Hsap_NP_000593.1	Hsap_NP_001027466.1	Hsap_NP_001035237.1	Hsap_NP_001076.2	Hsap_NP_001121172.1	Hsap_NP_001747.2	Hsap_NP_942130.1	Hsap_XP_006724746.1	Hsap_XP_011512974.1	Hsap_XP_016862107.1
HyS0004.189			OG0000467	2		Hsap_NP_054772.1	Hsap_NP_060261.2
HyS0004.190	Hsap_NP_859526.1	603056	OG0004816	1	TRUE	Hsap_NP_859526.1
HyS0004.199			OG0000482	1		Hsap_NP_056442.2
HyS0004.20			OG0000165	4		Hsap_NP_001230937.1	Hsap_NP_006603.2	Hsap_NP_055690.1	Hsap_NP_055889.2
HyS0004.203	Hsap_XP_016883180.1	126065	OG0000289	6	TRUE	Hsap_NP_000488.3	Hsap_NP_000489.3	Hsap_NP_000772.2	Hsap_NP_000775.1	Hsap_NP_000776.1	Hsap_XP_016883180.1
HyS0004.207			OG0000459	4		Hsap_NP_000203.2	Hsap_NP_000879.2	Hsap_NP_001120963.2	Hsap_XP_006721929.1
HyS0004.209	Hsap_NP_937818.1	156490	OG0001783	1	TRUE	Hsap_NP_937818.1
HyS0004.21			OG0000018	3		Hsap_NP_001295051.1	Hsap_NP_003050.2	Hsap_XP_006718493.1
HyS0004.210	Hsap_NP_775259.1	611220	OG0002422	1	TRUE	Hsap_NP_775259.1
HyS0004.211	Hsap_XP_006715894.1	603859	OG0001074	3	TRUE	Hsap_NP_003696.2	Hsap_XP_006715894.1	Hsap_XP_011518672.1
HyS0004.213			OG0000147	4		Hsap_NP_005991.1	Hsap_NP_006000.2	Hsap_NP_061816.1	Hsap_NP_525125.2
HyS0004.214	Hsap_XP_016867969.1	606833	OG0000426	4	TRUE	Hsap_NP_055542.1	Hsap_XP_011537072.1	Hsap_XP_011541131.1	Hsap_XP_016867969.1
HyS0004.215			OG0000748	2		Hsap_NP_001092872.1	Hsap_NP_689487.2
HyS0004.217			OG0001722	2		Hsap_NP_005267.2	Hsap_NP_055956.1
HyS0004.220	Hsap_NP_003070.3	603111	OG0004170	1	TRUE	Hsap_NP_003070.3
HyS0004.221	Hsap_NP_604391.1	123810	OG0002828	1	TRUE	Hsap_NP_604391.1
HyS0004.222			OG0000014	18		Hsap_NP_000450.2	Hsap_NP_001341913.1	Hsap_NP_002244.1	Hsap_NP_002520.2	Hsap_NP_004110.2	Hsap_NP_004551.2	Hsap_NP_005003.2	Hsap_NP_006171.2	Hsap_NP_006334.2	Hsap_NP_066124.1	Hsap_XP_005252051.1	Hsap_XP_005265227.2	Hsap_XP_006713931.1	Hsap_XP_006717771.1	Hsap_XP_011507889.1	Hsap_XP_011514525.1	Hsap_XP_011532780.1	Hsap_XP_011542745.1
HyS0004.224	Hsap_NP_776173.3	613893	OG0001425	1	TRUE	Hsap_NP_776173.3
HyS0004.226			OG0000007	12		Hsap_NP_000015.1	Hsap_NP_000016.1	Hsap_NP_000515.2	Hsap_NP_000612.1	Hsap_NP_000673.2	Hsap_NP_000674.2	Hsap_NP_000675.1	Hsap_NP_000788.2	Hsap_NP_000789.1	Hsap_NP_001277738.1	Hsap_NP_473362.1	Hsap_XP_016855642.1
HyS0004.229			OG0000170	6		Hsap_NP_000341.2	Hsap_NP_001080.2	Hsap_NP_758424.1	Hsap_XP_011509253.1	Hsap_XP_016869869.1	Hsap_XP_024307084.1
HyS0004.23			OG0001056	2		Hsap_NP_079191.2	Hsap_NP_937817.3
HyS0004.237	Hsap_NP_079130.2	617220	OG0005148	1	TRUE	Hsap_NP_079130.2
HyS0004.242			OG0000147	4		Hsap_NP_005991.1	Hsap_NP_006000.2	Hsap_NP_061816.1	Hsap_NP_525125.2
HyS0004.246			OG0000291	2		Hsap_NP_001244127.1	Hsap_XP_005262538.1
HyS0004.256	Hsap_XP_005257310.1	138945	OG0001686	1	TRUE	Hsap_XP_005257310.1
HyS0004.257	Hsap_NP_001264900.1	615247	OG0005932	1	TRUE	Hsap_NP_001264900.1
HyS0004.260	Hsap_NP_008817.1	606153	OG0008323	1	TRUE	Hsap_NP_008817.1
HyS0004.262			OG0000476	1		Hsap_NP_009075.1
HyS0004.267			OG0000162	1		Hsap_NP_000933.1
HyS0004.27			OG0000334	3		Hsap_NP_149109.1	Hsap_XP_011508781.1	Hsap_XP_024309300.1
HyS0004.271	Hsap_NP_009075.1	600346	OG0000476	1	TRUE	Hsap_NP_009075.1
HyS0004.277	Hsap_NP_001020114.1	608310	OG0003945	1	TRUE	Hsap_NP_001020114.1
HyS0004.283			OG0003945	1		Hsap_NP_001020114.1
HyS0004.298			OG0000038	20		Hsap_NP_000316.2	Hsap_NP_000442.1	Hsap_NP_000545.1	Hsap_NP_001306003.1	Hsap_NP_002644.4	Hsap_NP_003856.1	Hsap_NP_003915.2	Hsap_NP_005020.1	Hsap_NP_005160.2	Hsap_NP_006252.3	Hsap_NP_006483.2	Hsap_NP_008913.2	Hsap_NP_038463.2	Hsap_NP_055403.2	Hsap_NP_068374.1	Hsap_NP_068745.2	Hsap_NP_073207.1	Hsap_NP_620689.1	Hsap_NP_776248.1	Hsap_NP_878314.1
HyS0004.300	Hsap_XP_011539528.1	606879	OG0000564	2	TRUE	Hsap_XP_011539528.1	Hsap_XP_024303484.1
HyS0004.301			OG0000029	4		Hsap_NP_000171.1	Hsap_NP_001124154.1	Hsap_NP_004954.2	Hsap_XP_024303324.1
HyS0004.302	Hsap_XP_016856722.1	103180	OG0000075	3	TRUE	Hsap_NP_001310442.1	Hsap_NP_004302.1	Hsap_XP_016856722.1
HyS0004.304	Hsap_NP_000229.1	152427	OG0000314	2	TRUE	Hsap_NP_000229.1	Hsap_NP_758872.1
HyS0004.310			OG0000004	4		Hsap_NP_001072.2	Hsap_NP_006120.1	Hsap_NP_036596.3	Hsap_NP_113621.1
HyS0004.311			OG0000007	12		Hsap_NP_000015.1	Hsap_NP_000016.1	Hsap_NP_000515.2	Hsap_NP_000612.1	Hsap_NP_000673.2	Hsap_NP_000674.2	Hsap_NP_000675.1	Hsap_NP_000788.2	Hsap_NP_000789.1	Hsap_NP_001277738.1	Hsap_NP_473362.1	Hsap_XP_016855642.1
HyS0004.312	Hsap_NP_079265.2	611655	OG0004590	1	TRUE	Hsap_NP_079265.2
HyS0004.314			OG0000049	4		Hsap_NP_000085.1	Hsap_NP_002372.1	Hsap_NP_004360.2	Hsap_XP_016876560.1
HyS0004.32	Hsap_NP_006822.1	608757	OG0003673	1	TRUE	Hsap_NP_006822.1
HyS0004.331			OG0000024	2		Hsap_NP_001138724.1	Hsap_NP_114141.2
HyS0004.332	Hsap_XP_011514879.1	617949	OG0003401	1	TRUE	Hsap_XP_011514879.1
HyS0004.334			OG0000319	1		Hsap_NP_775766.2
HyS0004.335			OG0000400	2		Hsap_NP_758952.4	Hsap_XP_011532545.1
HyS0004.336			OG0000400	2		Hsap_NP_758952.4	Hsap_XP_011532545.1
HyS0004.337			OG0000400	2		Hsap_NP_758952.4	Hsap_XP_011532545.1
HyS0004.338			OG0000400	2		Hsap_NP_758952.4	Hsap_XP_011532545.1
HyS0004.341			OG0000237	4		Hsap_NP_001238949.1	Hsap_NP_060106.2	Hsap_NP_060132.3	Hsap_XP_016877839.1
HyS0004.342			OG0000008	20		Hsap_NP_000200.1	Hsap_NP_001073136.1	Hsap_NP_001106175.1	Hsap_NP_001129743.2	Hsap_NP_001180.1	Hsap_NP_002135.2	Hsap_NP_002139.2	Hsap_NP_002439.2	Hsap_NP_002440.2	Hsap_NP_004089.1	Hsap_NP_004378.1	Hsap_NP_004518.1	Hsap_NP_005211.1	Hsap_NP_005212.1	Hsap_NP_005506.3	Hsap_NP_005513.1	Hsap_NP_006726.1	Hsap_NP_061815.2	Hsap_NP_612138.1	Hsap_XP_016872278.1
HyS0004.343	Hsap_NP_001120679.1	606622	OG0001836	1	TRUE	Hsap_NP_001120679.1
HyS0004.347	Hsap_XP_005248234.1	612013	OG0001788	1	TRUE	Hsap_XP_005248234.1
HyS0004.348			OG0000155	3		Hsap_NP_000546.2	Hsap_XP_011528141.1	Hsap_XP_016869210.1
HyS0004.350			OG0000008	20		Hsap_NP_000200.1	Hsap_NP_001073136.1	Hsap_NP_001106175.1	Hsap_NP_001129743.2	Hsap_NP_001180.1	Hsap_NP_002135.2	Hsap_NP_002139.2	Hsap_NP_002439.2	Hsap_NP_002440.2	Hsap_NP_004089.1	Hsap_NP_004378.1	Hsap_NP_004518.1	Hsap_NP_005211.1	Hsap_NP_005212.1	Hsap_NP_005506.3	Hsap_NP_005513.1	Hsap_NP_006726.1	Hsap_NP_061815.2	Hsap_NP_612138.1	Hsap_XP_016872278.1
HyS0004.351			OG0000318	9		Hsap_NP_000079.2	Hsap_NP_000080.2	Hsap_NP_000081.1	Hsap_NP_000384.2	Hsap_NP_001265003.1	Hsap_NP_116277.2	Hsap_NP_542411.2	Hsap_XP_016855823.1	Hsap_XP_016874317.1
HyS0004.352			OG0001277	1		Hsap_XP_016885275.1
HyS0004.354	Hsap_NP_001274418.1	603681	OG0000344	2	TRUE	Hsap_NP_001274418.1	Hsap_XP_005264641.1
HyS0004.355	Hsap_XP_016885275.1	300392	OG0001277	1	TRUE	Hsap_XP_016885275.1
HyS0004.356			OG0001277	1		Hsap_XP_016885275.1
HyS0004.358			OG0000322	2		Hsap_XP_006716091.1	Hsap_XP_016869431.1
HyS0004.366			OG0000003	12		Hsap_NP_000570.1	Hsap_NP_000625.1	Hsap_NP_001050.1	Hsap_NP_001116513.2	Hsap_NP_001155969.1	Hsap_NP_001164645.1	Hsap_NP_001166031.1	Hsap_NP_001334985.1	Hsap_NP_004826.5	Hsap_NP_115940.2	Hsap_NP_940799.1	Hsap_XP_011515565.1
HyS0004.368			OG0000863	1		Hsap_XP_011528076.1
HyS0004.375			OG0000104	3		Hsap_NP_058634.4	Hsap_XP_005264262.1	Hsap_XP_011534658.1
HyS0004.380	Hsap_NP_055680.3	615638	OG0002637	1	TRUE	Hsap_NP_055680.3
HyS0004.382			OG0000126	1		Hsap_NP_055887.3
HyS0004.383			OG0000515	3		Hsap_NP_002373.3	Hsap_NP_002458.2	Hsap_NP_005369.2
HyS0004.384			OG0000037	9		Hsap_NP_000803.2	Hsap_NP_000815.1	Hsap_NP_001121117.1	Hsap_NP_001139512.1	Hsap_NP_068711.1	Hsap_NP_068712.1	Hsap_NP_944493.2	Hsap_XP_016856425.1	Hsap_XP_024309731.1
HyS0004.385			OG0000037	9		Hsap_NP_000803.2	Hsap_NP_000815.1	Hsap_NP_001121117.1	Hsap_NP_001139512.1	Hsap_NP_068711.1	Hsap_NP_068712.1	Hsap_NP_944493.2	Hsap_XP_016856425.1	Hsap_XP_024309731.1
HyS0004.387			OG0000037	9		Hsap_NP_000803.2	Hsap_NP_000815.1	Hsap_NP_001121117.1	Hsap_NP_001139512.1	Hsap_NP_068711.1	Hsap_NP_068712.1	Hsap_NP_944493.2	Hsap_XP_016856425.1	Hsap_XP_024309731.1
HyS0004.389			OG0000029	4		Hsap_NP_000171.1	Hsap_NP_001124154.1	Hsap_NP_004954.2	Hsap_XP_024303324.1
HyS0004.392	Hsap_NP_004926.1	123831	OG0000161	4	TRUE	Hsap_NP_000066.1	Hsap_NP_001138778.1	Hsap_NP_004926.1	Hsap_XP_016868239.1
HyS0004.395			OG0000024	2		Hsap_NP_001138724.1	Hsap_NP_114141.2
HyS0004.396			OG0000024	2		Hsap_NP_001138724.1	Hsap_NP_114141.2
HyS0004.397			OG0000011	11		Hsap_NP_001157814.1	Hsap_NP_001316524.1	Hsap_NP_001336347.1	Hsap_NP_005997.2	Hsap_NP_006054.2	Hsap_NP_055612.2	Hsap_NP_059111.2	Hsap_NP_071324.1	Hsap_NP_085127.2	Hsap_NP_689606.2	Hsap_XP_006715816.1
HyS0004.4	Hsap_NP_001229804.1	616054	OG0004694	1	TRUE	Hsap_NP_001229804.1
HyS0004.400			OG0000731	5		Hsap_NP_000209.2	Hsap_NP_001153605.1	Hsap_NP_004510.1	Hsap_NP_004691.2	Hsap_XP_011527112.1
HyS0004.405			OG0000057	4		Hsap_NP_001304019.1	Hsap_NP_002237.1	Hsap_NP_862823.1	Hsap_XP_011515403.1
HyS0004.406			OG0000057	4		Hsap_NP_001304019.1	Hsap_NP_002237.1	Hsap_NP_862823.1	Hsap_XP_011515403.1
HyS0004.407	Hsap_NP_057444.2	612958	OG0004616	1	TRUE	Hsap_NP_057444.2
HyS0004.41	Hsap_NP_000159.3	165240	OG0000282	8	TRUE	Hsap_NP_000159.3	Hsap_NP_001035878.1	Hsap_NP_003403.2	Hsap_NP_003404.1	Hsap_NP_009060.2	Hsap_NP_115964.2	Hsap_XP_011509271.2	Hsap_XP_011536491.1
HyS0004.411			OG0000056	10		Hsap_NP_000518.1	Hsap_NP_002325.2	Hsap_NP_002327.2	Hsap_NP_003374.3	Hsap_NP_004516.2	Hsap_NP_057663.1	Hsap_XP_005271230.1	Hsap_XP_011543331.1	Hsap_XP_016863334.1	Hsap_XP_016874792.1
HyS0004.42			OG0000140	1		Hsap_NP_004125.3
HyS0004.421			OG0000065	3		Hsap_NP_001264044.1	Hsap_XP_011522005.1	Hsap_XP_016861618.1
HyS0004.426	Hsap_NP_060087.3	190198	OG0000023	3	FALSE	Hsap_NP_058637.1	Hsap_NP_775960.4	Hsap_XP_016856341.1
HyS0004.427			OG0000536	1		Hsap_XP_011516921.1
HyS0004.428			OG0000536	1		Hsap_XP_011516921.1
HyS0004.433			OG0000290	6		Hsap_NP_000410.2	Hsap_NP_001073286.1	Hsap_NP_002194.2	Hsap_NP_002195.1	Hsap_NP_003629.2	Hsap_XP_005268896.1
HyS0004.435	Hsap_NP_001095886.1	612358	OG0007932
HyS0004.44	Hsap_NP_067632.2	616458	OG0000223	3	TRUE	Hsap_NP_001129711.1	Hsap_NP_067632.2	Hsap_XP_011529864.1
HyS0004.443			OG0000012	8		Hsap_NP_001242914.1	Hsap_NP_006429.2	Hsap_NP_055072.3	Hsap_NP_056532.4	Hsap_NP_066978.1	Hsap_NP_922938.1	Hsap_XP_005270185.1	Hsap_XP_011538118.1
HyS0004.445			OG0000037	9		Hsap_NP_000803.2	Hsap_NP_000815.1	Hsap_NP_001121117.1	Hsap_NP_001139512.1	Hsap_NP_068711.1	Hsap_NP_068712.1	Hsap_NP_944493.2	Hsap_XP_016856425.1	Hsap_XP_024309731.1
HyS0004.446			OG0000088	6		Hsap_NP_000543.2	Hsap_NP_001264198.1	Hsap_NP_002449.2	Hsap_NP_005413.2	Hsap_NP_597725.1	Hsap_XP_005268859.1
HyS0004.448			OG0000163	6		Hsap_NP_001123914.1	Hsap_NP_001243750.1	Hsap_NP_002515.1	Hsap_NP_036351.3	Hsap_NP_036382.2	Hsap_NP_203524.1
HyS0004.45			OG0002677	2		Hsap_NP_004364.2	Hsap_NP_005196.1
HyS0004.450			OG0000163	6		Hsap_NP_001123914.1	Hsap_NP_001243750.1	Hsap_NP_002515.1	Hsap_NP_036351.3	Hsap_NP_036382.2	Hsap_NP_203524.1
HyS0004.453			OG0000089	3		Hsap_NP_001978.1	Hsap_NP_002008.2	Hsap_NP_006485.2
HyS0004.454			OG0000026	4		Hsap_NP_001073327.1	Hsap_XP_006715579.1	Hsap_XP_011521763.1	Hsap_XP_011526250.1
HyS0004.457	Hsap_NP_001153048.1	600228	OG0000025	3	TRUE	Hsap_NP_001030.2	Hsap_NP_001153048.1	Hsap_XP_016879014.1
HyS0004.458			OG0000025	3		Hsap_NP_001030.2	Hsap_NP_001153048.1	Hsap_XP_016879014.1
HyS0004.465			OG0004564	1		Hsap_NP_003378.3
HyS0004.466	Hsap_NP_002038.2	600287	OG0003222	1	TRUE	Hsap_NP_002038.2
HyS0004.471			OG0000046	12		Hsap_NP_000465.1	Hsap_NP_001004311.2	Hsap_NP_002491.2	Hsap_NP_004307.2	Hsap_NP_005412.1	Hsap_NP_006151.3	Hsap_NP_476527.1	Hsap_NP_660161.1	Hsap_NP_835455.1	Hsap_XP_016857678.1	Hsap_XP_016871769.1	Hsap_XP_024307284.1
HyS0004.472			OG0000046	12		Hsap_NP_000465.1	Hsap_NP_001004311.2	Hsap_NP_002491.2	Hsap_NP_004307.2	Hsap_NP_005412.1	Hsap_NP_006151.3	Hsap_NP_476527.1	Hsap_NP_660161.1	Hsap_NP_835455.1	Hsap_XP_016857678.1	Hsap_XP_016871769.1	Hsap_XP_024307284.1
HyS0004.483	Hsap_NP_899199.2	108370	OG0003674	1	TRUE	Hsap_NP_899199.2
HyS0004.484	Hsap_NP_001338587.1	608736	OG0000381	4	TRUE	Hsap_NP_001338587.1	Hsap_NP_570901.2	Hsap_XP_011536500.1	Hsap_XP_024309952.1
HyS0004.485			OG0001147	1		Hsap_NP_006249.1
HyS0004.49			OG0002261	1		Hsap_NP_000185.1
HyS0004.493	Hsap_NP_060764.3	616120	OG0004311	1	TRUE	Hsap_NP_060764.3
HyS0004.50	Hsap_NP_000185.1	308000	OG0002261	1	TRUE	Hsap_NP_000185.1
HyS0004.501			OG0000381	4		Hsap_NP_001338587.1	Hsap_NP_570901.2	Hsap_XP_011536500.1	Hsap_XP_024309952.1
HyS0004.502			OG0000381	4		Hsap_NP_001338587.1	Hsap_NP_570901.2	Hsap_XP_011536500.1	Hsap_XP_024309952.1
HyS0004.503			OG0003649	1		Hsap_XP_006716104.1
HyS0004.506	Hsap_NP_004035.2	601731	OG0004027	1	TRUE	Hsap_NP_004035.2
HyS0004.509			OG0000102	2		Hsap_NP_078918.3	Hsap_XP_005246506.1
HyS0004.51	Hsap_XP_011532080.1	612907	OG0002776	1	TRUE	Hsap_XP_011532080.1
HyS0004.510	Hsap_NP_001180395.1	612452	OG0003560	1	TRUE	Hsap_NP_001180395.1
HyS0004.512	Hsap_XP_016862134.1	606568	OG0005969	1	TRUE	Hsap_XP_016862134.1
HyS0004.514			OG0001664	1		Hsap_XP_016879751.1
HyS0004.515	Hsap_XP_016879751.1	600019	OG0001664	1	TRUE	Hsap_XP_016879751.1
HyS0004.518	Hsap_XP_005266372.1	607111	OG0004635	1	TRUE	Hsap_XP_005266372.1
HyS0004.521	Hsap_XP_005250451.1	605239	OG0000866	3	TRUE	Hsap_NP_036595.2	Hsap_XP_005250451.1	Hsap_XP_024304090.1
HyS0004.523			OG0000056	10		Hsap_NP_000518.1	Hsap_NP_002325.2	Hsap_NP_002327.2	Hsap_NP_003374.3	Hsap_NP_004516.2	Hsap_NP_057663.1	Hsap_XP_005271230.1	Hsap_XP_011543331.1	Hsap_XP_016863334.1	Hsap_XP_016874792.1
HyS0004.524			OG0000030	1		Hsap_XP_016877107.1
HyS0004.53	Hsap_XP_006712709.1	617245	OG0000370	3	TRUE	Hsap_NP_001244066.1	Hsap_XP_006712709.1	Hsap_XP_006722489.1
HyS0004.54			OG0000163	6		Hsap_NP_001123914.1	Hsap_NP_001243750.1	Hsap_NP_002515.1	Hsap_NP_036351.3	Hsap_NP_036382.2	Hsap_NP_203524.1
HyS0004.55	Hsap_NP_000246.2	609058	OG0004163	1	TRUE	Hsap_NP_000246.2
HyS0004.57	Hsap_NP_001186913.1	157655	OG0003290	1	TRUE	Hsap_NP_001186913.1
HyS0004.58	Hsap_NP_056321.2	609831	OG0005844	1	TRUE	Hsap_NP_056321.2
HyS0004.6	Hsap_NP_079276.2	612515	OG0007418	1	TRUE	Hsap_NP_079276.2
HyS0004.61	Hsap_XP_024302341.1	614725	OG0004699	1	TRUE	Hsap_XP_024302341.1
HyS0004.62	Hsap_NP_005211.1	600525	OG0000008	20	TRUE	Hsap_NP_000200.1	Hsap_NP_001073136.1	Hsap_NP_001106175.1	Hsap_NP_001129743.2	Hsap_NP_001180.1	Hsap_NP_002135.2	Hsap_NP_002139.2	Hsap_NP_002439.2	Hsap_NP_002440.2	Hsap_NP_004089.1	Hsap_NP_004378.1	Hsap_NP_004518.1	Hsap_NP_005211.1	Hsap_NP_005212.1	Hsap_NP_005506.3	Hsap_NP_005513.1	Hsap_NP_006726.1	Hsap_NP_061815.2	Hsap_NP_612138.1	Hsap_XP_016872278.1
HyS0004.66	Hsap_XP_016875394.1	606887	OG0003723	1	TRUE	Hsap_XP_016875394.1
HyS0004.69	Hsap_XP_011544244.2	182888	OG0000297
HyS0004.71			OG0000049	4		Hsap_NP_000085.1	Hsap_NP_002372.1	Hsap_NP_004360.2	Hsap_XP_016876560.1
HyS0004.76			OG0000177	3		Hsap_NP_001121367.1	Hsap_NP_569735.1	Hsap_XP_016874858.1
HyS0004.77			OG0000026	4		Hsap_NP_001073327.1	Hsap_XP_006715579.1	Hsap_XP_011521763.1	Hsap_XP_011526250.1
HyS0004.78	Hsap_NP_775922.3	615796	OG0007867	1	TRUE	Hsap_NP_775922.3
HyS0004.81			OG0000459	4		Hsap_NP_000203.2	Hsap_NP_000879.2	Hsap_NP_001120963.2	Hsap_XP_006721929.1
HyS0004.82			OG0001117	3		Hsap_NP_000944.1	Hsap_NP_000947.2	Hsap_NP_963998.2
HyS0004.84	Hsap_NP_689596.4	614184	OG0000728	1	TRUE	Hsap_NP_689596.4
HyS0004.87			OG0000026	4		Hsap_NP_001073327.1	Hsap_XP_006715579.1	Hsap_XP_011521763.1	Hsap_XP_011526250.1
HyS0004.96	Hsap_NP_006727.2	604139	OG0000114	5	TRUE	Hsap_NP_006727.2	Hsap_NP_068572.1	Hsap_XP_005249572.1	Hsap_XP_011527351.1	Hsap_XP_011543306.1
HyS0004.97	Hsap_NP_005267.2	138420	OG0001722	2	TRUE	Hsap_NP_005267.2	Hsap_NP_055956.1
HyS0005.1			OG0000265	3		Hsap_NP_006006.3	Hsap_NP_689854.2	Hsap_XP_011534286.2
HyS0005.10			OG0003720	1		Hsap_NP_001008389.1
HyS0005.105			OG0000738	3		Hsap_NP_005154.2	Hsap_NP_005456.1	Hsap_XP_024307184.1
HyS0005.107	Hsap_NP_000173.2	600890	OG0002785	1	TRUE	Hsap_NP_000173.2
HyS0005.110			OG0000223	3		Hsap_NP_001129711.1	Hsap_NP_067632.2	Hsap_XP_011529864.1
HyS0005.111			OG0000347	4		Hsap_NP_003029.2	Hsap_XP_005248399.1	Hsap_XP_011516309.1	Hsap_XP_016873625.1
HyS0005.114			OG0000347	4		Hsap_NP_003029.2	Hsap_XP_005248399.1	Hsap_XP_011516309.1	Hsap_XP_016873625.1
HyS0005.115			OG0000499	1		Hsap_NP_940980.3
HyS0005.120	Hsap_NP_002653.1	602382	OG0001560	1	TRUE	Hsap_NP_002653.1
HyS0005.123	Hsap_NP_055661.3	610657	OG0002688	1	TRUE	Hsap_NP_055661.3
HyS0005.125			OG0000179	1		Hsap_XP_011521787.1
HyS0005.128			OG0000467	2		Hsap_NP_054772.1	Hsap_NP_060261.2
HyS0005.13			OG0000728	1		Hsap_NP_689596.4
HyS0005.130	Hsap_XP_024306239.1	613278	OG0002408	1	TRUE	Hsap_XP_024306239.1
HyS0005.131			OG0002408	1		Hsap_XP_024306239.1
HyS0005.135			OG0001773	1		Hsap_NP_001073932.1
HyS0005.137	Hsap_NP_001073932.1	603297	OG0001773	1	TRUE	Hsap_NP_001073932.1
HyS0005.139			OG0000063	7		Hsap_NP_001177740.1	Hsap_NP_002130.2	Hsap_NP_004072.3	Hsap_NP_112533.1	Hsap_NP_112740.1	Hsap_XP_005268883.1	Hsap_XP_016856357.1
HyS0005.14			OG0000400	2		Hsap_NP_758952.4	Hsap_XP_011532545.1
HyS0005.144			OG0000094	8		Hsap_NP_055058.2	Hsap_NP_055059.2	Hsap_NP_112219.3	Hsap_NP_620594.1	Hsap_NP_955387.1	Hsap_XP_005272294.1	Hsap_XP_011507946.1	Hsap_XP_016877462.1
HyS0005.146	Hsap_NP_006432.1	604197	OG0006665
HyS0005.149	Hsap_NP_036441.2	603290	OG0001658	2	TRUE	Hsap_NP_036441.2	Hsap_NP_277052.1
HyS0005.150	Hsap_NP_620714.2	612163	OG0000836	1	TRUE	Hsap_NP_620714.2
HyS0005.152	Hsap_NP_060283.3	614010	OG0001292	1	TRUE	Hsap_NP_060283.3
HyS0005.155			OG0000283	1		Hsap_NP_000168.1
HyS0005.157	Hsap_XP_024304205.1	604773	OG0006643	1	TRUE	Hsap_XP_024304205.1
HyS0005.166			OG0000123	5		Hsap_NP_000058.1	Hsap_NP_001209.1	Hsap_NP_001308766.1	Hsap_XP_005257696.1	Hsap_XP_011521611.1
HyS0005.170			OG0000004	4		Hsap_NP_001072.2	Hsap_NP_006120.1	Hsap_NP_036596.3	Hsap_NP_113621.1
HyS0005.173	Hsap_NP_001276736.1	123590	OG0000242	5	TRUE	Hsap_NP_000385.1	Hsap_NP_001276736.1	Hsap_NP_001531.1	Hsap_NP_006299.1	Hsap_NP_055180.1
HyS0005.176	Hsap_XP_011512303.1	607878	OG0002421	1	TRUE	Hsap_XP_011512303.1
HyS0005.179	Hsap_NP_861448.2	617218	OG0000539	1	TRUE	Hsap_NP_861448.2
HyS0005.182	Hsap_NP_056508.2	610621	OG0005735	1	TRUE	Hsap_NP_056508.2
HyS0005.183			OG0000542	1		Hsap_NP_001129131.1
HyS0005.184	Hsap_NP_644810.1	609669	OG0003310	1	TRUE	Hsap_NP_644810.1
HyS0005.185	Hsap_NP_005422.1	600375	OG0006420	1	TRUE	Hsap_NP_005422.1
HyS0005.188	Hsap_NP_000394.2	606953	OG0001630	1	TRUE	Hsap_NP_000394.2
HyS0005.189			OG0000328	5		Hsap_NP_000431.2	Hsap_NP_006195.3	Hsap_NP_058649.3	Hsap_XP_011511775.1	Hsap_XP_011533689.2
HyS0005.192			OG0000388	2		Hsap_NP_001138354.1	Hsap_XP_006724806.1
HyS0005.195	Hsap_NP_858058.1	300255	OG0003743	1	TRUE	Hsap_NP_858058.1
HyS0005.199	Hsap_XP_016878742.1	602656	OG0003627	1	TRUE	Hsap_XP_016878742.1
HyS0005.2			OG0001615	1		Hsap_NP_068780.2
HyS0005.201			OG0000070	4		Hsap_NP_001804.2	Hsap_NP_004514.2	Hsap_NP_036442.3	Hsap_XP_011519833.1
HyS0005.202	Hsap_XP_024308193.1	300651	OG0004795	1	TRUE	Hsap_XP_024308193.1
HyS0005.204	Hsap_NP_001035930.1	176801	OG0000761	2	TRUE	Hsap_NP_001035930.1	Hsap_NP_942140.2
HyS0005.209			OG0000008	20		Hsap_NP_000200.1	Hsap_NP_001073136.1	Hsap_NP_001106175.1	Hsap_NP_001129743.2	Hsap_NP_001180.1	Hsap_NP_002135.2	Hsap_NP_002139.2	Hsap_NP_002439.2	Hsap_NP_002440.2	Hsap_NP_004089.1	Hsap_NP_004378.1	Hsap_NP_004518.1	Hsap_NP_005211.1	Hsap_NP_005212.1	Hsap_NP_005506.3	Hsap_NP_005513.1	Hsap_NP_006726.1	Hsap_NP_061815.2	Hsap_NP_612138.1	Hsap_XP_016872278.1
HyS0005.210			OG0001038	1		Hsap_NP_001252521.1
HyS0005.218			OG0000113	1		Hsap_NP_005449.5
HyS0005.223	Hsap_NP_003328.1	179095	OG0003364	2	TRUE	Hsap_NP_003327.2	Hsap_NP_003328.1
HyS0005.224	Hsap_NP_001343945.1	171650	OG0013876
HyS0005.234	Hsap_NP_001091868.1	601924	OG0002758	1	TRUE	Hsap_NP_001091868.1
HyS0005.235	Hsap_NP_001017979.1	612994	OG0006210	1	TRUE	Hsap_NP_001017979.1
HyS0005.236	Hsap_NP_003898.2	603945	OG0002943	1	TRUE	Hsap_NP_003898.2
HyS0005.245			OG0000217	1		Hsap_NP_542400.2
HyS0005.246	Hsap_NP_005506.3	142994	OG0000008	20	TRUE	Hsap_NP_000200.1	Hsap_NP_001073136.1	Hsap_NP_001106175.1	Hsap_NP_001129743.2	Hsap_NP_001180.1	Hsap_NP_002135.2	Hsap_NP_002139.2	Hsap_NP_002439.2	Hsap_NP_002440.2	Hsap_NP_004089.1	Hsap_NP_004378.1	Hsap_NP_004518.1	Hsap_NP_005211.1	Hsap_NP_005212.1	Hsap_NP_005506.3	Hsap_NP_005513.1	Hsap_NP_006726.1	Hsap_NP_061815.2	Hsap_NP_612138.1	Hsap_XP_016872278.1
HyS0005.249	Hsap_NP_003156.1	602926	OG0002097	2	TRUE	Hsap_NP_001258963.1	Hsap_NP_003156.1
HyS0005.250	Hsap_NP_002878.2	107820	OG0001333	2	TRUE	Hsap_NP_001337434.1	Hsap_NP_002878.2
HyS0005.252			OG0000282	8		Hsap_NP_000159.3	Hsap_NP_001035878.1	Hsap_NP_003403.2	Hsap_NP_003404.1	Hsap_NP_009060.2	Hsap_NP_115964.2	Hsap_XP_011509271.2	Hsap_XP_011536491.1
HyS0005.254			OG0002271	1		Hsap_NP_002383.2
HyS0005.255			OG0003339	1		Hsap_NP_001687.1
HyS0005.257			OG0000581	1		Hsap_NP_002706.1
HyS0005.258			OG0002190	1		Hsap_NP_001612.1
HyS0005.260			OG0000767	1		Hsap_XP_016876625.1
HyS0005.263			OG0000113	1		Hsap_NP_005449.5
HyS0005.267			OG0000050	1		Hsap_NP_001336091.1
HyS0005.270			OG0000205	1		Hsap_NP_001338557.1
HyS0005.271	Hsap_NP_000973.2	603636	OG0003464	1	TRUE	Hsap_NP_000973.2
HyS0005.274	Hsap_XP_011542723.1	609353	OG0004527	1	TRUE	Hsap_XP_011542723.1
HyS0005.278	Hsap_XP_024302311.1	125264	OG0006037	1	TRUE	Hsap_XP_024302311.1
HyS0005.279	Hsap_XP_016885266.1	314370	OG0001150	1	TRUE	Hsap_XP_016885266.1
HyS0005.280	Hsap_NP_005655.1	603856	OG0002600	1	TRUE	Hsap_NP_005655.1
HyS0005.284	Hsap_NP_057088.2	617094	OG0005453	1	TRUE	Hsap_NP_057088.2
HyS0005.286	Hsap_NP_001165948.1	604712	OG0002353	1	TRUE	Hsap_NP_001165948.1
HyS0005.288	Hsap_NP_055083.1	605789	OG0001852	1	TRUE	Hsap_NP_055083.1
HyS0005.29			OG0002100	2		Hsap_NP_001305466.1	Hsap_XP_011535987.1
HyS0005.290			OG0001675	1		Hsap_XP_016865941.1
HyS0005.294			OG0001381	1		Hsap_NP_000353.1
HyS0005.296	Hsap_XP_011515900.1	611654	OG0004093	1	TRUE	Hsap_XP_011515900.1
HyS0005.297			OG0000003	12		Hsap_NP_000570.1	Hsap_NP_000625.1	Hsap_NP_001050.1	Hsap_NP_001116513.2	Hsap_NP_001155969.1	Hsap_NP_001164645.1	Hsap_NP_001166031.1	Hsap_NP_001334985.1	Hsap_NP_004826.5	Hsap_NP_115940.2	Hsap_NP_940799.1	Hsap_XP_011515565.1
HyS0005.298			OG0000019	10		Hsap_NP_000071.1	Hsap_NP_000733.2	Hsap_NP_000734.2	Hsap_NP_000735.1	Hsap_NP_000736.2	Hsap_NP_000738.2	Hsap_NP_000739.1	Hsap_NP_000742.1	Hsap_NP_005190.4	Hsap_XP_016858745.1
HyS0005.299	Hsap_XP_016873254.1	613733	OG0006251	1	TRUE	Hsap_XP_016873254.1
HyS0005.3			OG0000063	7		Hsap_NP_001177740.1	Hsap_NP_002130.2	Hsap_NP_004072.3	Hsap_NP_112533.1	Hsap_NP_112740.1	Hsap_XP_005268883.1	Hsap_XP_016856357.1
HyS0005.30	Hsap_XP_011530157.2	609825	OG0003257	1	TRUE	Hsap_XP_011530157.2
HyS0005.300			OG0001362	2		Hsap_NP_000043.4	Hsap_XP_005266487.1
HyS0005.301	Hsap_XP_005259970.1	609458	OG0001036	1	TRUE	Hsap_XP_005259970.1
HyS0005.303	Hsap_NP_004658.3	605837	OG0000722	2	TRUE	Hsap_NP_004658.3	Hsap_XP_016878188.1
HyS0005.306	Hsap_NP_001186326.1	604588	OG0000134	4	TRUE	Hsap_NP_001186326.1	Hsap_NP_001316166.1	Hsap_NP_002488.1	Hsap_XP_011522940.1
HyS0005.308			OG0000072	5		Hsap_NP_000435.3	Hsap_NP_004817.2	Hsap_XP_005250050.1	Hsap_XP_011511158.1	Hsap_XP_011539174.1
HyS0005.310	Hsap_NP_110440.1	616254	OG0001625	1	TRUE	Hsap_NP_110440.1
HyS0005.321	Hsap_XP_005270849.1	142622	OG0000193	3	TRUE	Hsap_NP_001305990.1	Hsap_NP_002089.4	Hsap_XP_005270849.1
HyS0005.323			OG0000193	3		Hsap_NP_001305990.1	Hsap_NP_002089.4	Hsap_XP_005270849.1
HyS0005.326			OG0005138	1		Hsap_NP_057119.2
HyS0005.327			OG0003867	1		Hsap_NP_004522.1
HyS0005.330	Hsap_NP_004306.3	613468	OG0001186	1	TRUE	Hsap_NP_004306.3
HyS0005.337	Hsap_XP_011520726.1	133520	OG0002388	1	TRUE	Hsap_XP_011520726.1
HyS0005.345	Hsap_NP_061899.2	614123	OG0005333	1	TRUE	Hsap_NP_061899.2
HyS0005.347			OG0003876	1		Hsap_NP_054727.1
HyS0005.352	Hsap_NP_004444.2	231675	OG0004326	1	TRUE	Hsap_NP_004444.2
HyS0005.356	Hsap_XP_011511737.1	610285	OG0006449	1	TRUE	Hsap_XP_011511737.1
HyS0005.360			OG0000500	6		Hsap_NP_000120.2	Hsap_NP_000350.1	Hsap_NP_003236.3	Hsap_NP_945345.2	Hsap_NP_963925.2	Hsap_XP_011519652.1
HyS0005.363			OG0000175	3		Hsap_NP_001121170.1	Hsap_NP_001292204.1	Hsap_NP_001341895.1
HyS0005.365	Hsap_NP_001099028.1	614084	OG0001183	1	TRUE	Hsap_NP_001099028.1
HyS0005.366	Hsap_NP_059110.2	607057	OG0001490
HyS0005.368	Hsap_NP_006746.1	602063	OG0003079	1	TRUE	Hsap_NP_006746.1
HyS0005.370			OG0000752	3		Hsap_NP_001036002.1	Hsap_NP_775924.1	Hsap_XP_016885394.1
HyS0005.371			OG0000221	1		Hsap_NP_000430.3
HyS0005.373	Hsap_XP_016880042.1	200350	OG0001578	1	TRUE	Hsap_XP_016880042.1
HyS0005.374	Hsap_XP_011542890.1	605795	OG0002160	1	TRUE	Hsap_XP_011542890.1
HyS0005.376	Hsap_XP_005259995.1	171640	OG0002051	1	TRUE	Hsap_XP_005259995.1
HyS0005.377	Hsap_XP_016883514.1	190090	OG0000044	10	TRUE	Hsap_NP_001274273.1	Hsap_NP_004295.2	Hsap_NP_005537.3	Hsap_NP_009297.2	Hsap_XP_011523331.1	Hsap_XP_011542127.1	Hsap_XP_016856524.1	Hsap_XP_016860356.1	Hsap_XP_016883514.1	Hsap_XP_024302815.1
HyS0005.378			OG0000044	10		Hsap_NP_001274273.1	Hsap_NP_004295.2	Hsap_NP_005537.3	Hsap_NP_009297.2	Hsap_XP_011523331.1	Hsap_XP_011542127.1	Hsap_XP_016856524.1	Hsap_XP_016860356.1	Hsap_XP_016883514.1	Hsap_XP_024302815.1
HyS0005.379			OG0000044	10		Hsap_NP_001274273.1	Hsap_NP_004295.2	Hsap_NP_005537.3	Hsap_NP_009297.2	Hsap_XP_011523331.1	Hsap_XP_011542127.1	Hsap_XP_016856524.1	Hsap_XP_016860356.1	Hsap_XP_016883514.1	Hsap_XP_024302815.1
HyS0005.386	Hsap_NP_060609.2	612517	OG0001392	1	TRUE	Hsap_NP_060609.2
HyS0005.387	Hsap_NP_056477.1	607386	OG0001697	1	TRUE	Hsap_NP_056477.1
HyS0005.398			OG0000003	12		Hsap_NP_000570.1	Hsap_NP_000625.1	Hsap_NP_001050.1	Hsap_NP_001116513.2	Hsap_NP_001155969.1	Hsap_NP_001164645.1	Hsap_NP_001166031.1	Hsap_NP_001334985.1	Hsap_NP_004826.5	Hsap_NP_115940.2	Hsap_NP_940799.1	Hsap_XP_011515565.1
HyS0005.399			OG0000003	12		Hsap_NP_000570.1	Hsap_NP_000625.1	Hsap_NP_001050.1	Hsap_NP_001116513.2	Hsap_NP_001155969.1	Hsap_NP_001164645.1	Hsap_NP_001166031.1	Hsap_NP_001334985.1	Hsap_NP_004826.5	Hsap_NP_115940.2	Hsap_NP_940799.1	Hsap_XP_011515565.1
HyS0005.401			OG0000046	12		Hsap_NP_000465.1	Hsap_NP_001004311.2	Hsap_NP_002491.2	Hsap_NP_004307.2	Hsap_NP_005412.1	Hsap_NP_006151.3	Hsap_NP_476527.1	Hsap_NP_660161.1	Hsap_NP_835455.1	Hsap_XP_016857678.1	Hsap_XP_016871769.1	Hsap_XP_024307284.1
HyS0005.404			OG0001783	1		Hsap_NP_937818.1
HyS0005.410	Hsap_NP_003347.1	602044	OG0000594	2	TRUE	Hsap_NP_003347.1	Hsap_XP_024304442.1
HyS0005.411	Hsap_NP_660304.1	608977	OG0004856	1	TRUE	Hsap_NP_660304.1
HyS0005.412	Hsap_NP_066288.2	602635	OG0002224	1	TRUE	Hsap_NP_066288.2
HyS0005.413	Hsap_NP_000268.1	612349	OG0000936	3	TRUE	Hsap_NP_000268.1	Hsap_NP_775489.2	Hsap_NP_954986.2
HyS0005.42	Hsap_XP_011520495.1	603158	OG0000893	1	TRUE	Hsap_XP_011520495.1
HyS0005.424			OG0000027	7		Hsap_NP_000249.1	Hsap_NP_001292553.1	Hsap_NP_001305425.1	Hsap_NP_524144.1	Hsap_XP_006720321.1	Hsap_XP_011543483.1	Hsap_XP_016880172.1
HyS0005.426			OG0000026	4		Hsap_NP_001073327.1	Hsap_XP_006715579.1	Hsap_XP_011521763.1	Hsap_XP_011526250.1
HyS0005.436	Hsap_NP_009106.1	611605	OG0004269	2	TRUE	Hsap_NP_001334790.1	Hsap_NP_009106.1
HyS0005.437			OG0000046	12		Hsap_NP_000465.1	Hsap_NP_001004311.2	Hsap_NP_002491.2	Hsap_NP_004307.2	Hsap_NP_005412.1	Hsap_NP_006151.3	Hsap_NP_476527.1	Hsap_NP_660161.1	Hsap_NP_835455.1	Hsap_XP_016857678.1	Hsap_XP_016871769.1	Hsap_XP_024307284.1
HyS0005.440	Hsap_XP_011530621.1	611565	OG0001227	1	TRUE	Hsap_XP_011530621.1
HyS0005.442	Hsap_NP_001124154.1	139396	OG0000029	4	TRUE	Hsap_NP_000171.1	Hsap_NP_001124154.1	Hsap_NP_004954.2	Hsap_XP_024303324.1
HyS0005.446	Hsap_NP_004199.1	300169	OG0001855	1	TRUE	Hsap_NP_004199.1
HyS0005.45	Hsap_XP_005269798.1	602572	OG0000321	2	TRUE	Hsap_NP_001145.1	Hsap_XP_005269798.1
HyS0005.460	Hsap_NP_001821.2	302910	OG0001967	2	TRUE	Hsap_NP_001821.2	Hsap_XP_016884747.1
HyS0005.464			OG0000287	2		Hsap_NP_057240.3	Hsap_XP_011529474.1
HyS0005.469	Hsap_NP_003098.1	184430	OG0000080	11	TRUE	Hsap_NP_000337.1	Hsap_NP_001291744.1	Hsap_NP_003097.1	Hsap_NP_003098.1	Hsap_NP_003099.1	Hsap_NP_003131.1	Hsap_NP_005625.2	Hsap_NP_008872.1	Hsap_NP_060889.1	Hsap_NP_071899.1	Hsap_XP_016875377.1
HyS0005.47	Hsap_XP_005266130.1	138249	OG0000637	4	TRUE	Hsap_XP_005266130.1	Hsap_XP_011525174.1	Hsap_XP_016874708.1	Hsap_XP_016878661.1
HyS0005.480	Hsap_NP_057240.3	603557	OG0000287	2	TRUE	Hsap_NP_057240.3	Hsap_XP_011529474.1
HyS0005.495	Hsap_NP_006512.2	314310	OG0002095	2	TRUE	Hsap_NP_001341533.1	Hsap_NP_006512.2
HyS0005.500	Hsap_NP_001035982.1	614567	OG0000150	4	TRUE	Hsap_NP_001035982.1	Hsap_NP_006720.1	Hsap_XP_016877084.1	Hsap_XP_024310152.1
HyS0005.501	Hsap_NP_058649.3	604961	OG0000328	5	TRUE	Hsap_NP_000431.2	Hsap_NP_006195.3	Hsap_NP_058649.3	Hsap_XP_011511775.1	Hsap_XP_011533689.2
HyS0005.504			OG0000328	5		Hsap_NP_000431.2	Hsap_NP_006195.3	Hsap_NP_058649.3	Hsap_XP_011511775.1	Hsap_XP_011533689.2
HyS0005.54			OG0001133	1		Hsap_NP_036602.1
HyS0005.56	Hsap_NP_001028675.1	607690	OG0002378	1	TRUE	Hsap_NP_001028675.1
HyS0005.57	Hsap_XP_006717520.1	616305	OG0002972	1	TRUE	Hsap_XP_006717520.1
HyS0005.62			OG0002356	1		Hsap_NP_001310011.1
HyS0005.67			OG0000335	8		Hsap_NP_002001.1	Hsap_NP_003859.1	Hsap_NP_004455.2	Hsap_NP_005238.1	Hsap_NP_062825.1	Hsap_NP_066360.1	Hsap_NP_787125.1	Hsap_XP_005248321.1
HyS0005.68	Hsap_NP_000381.1	300390	OG0003713	1	TRUE	Hsap_NP_000381.1
HyS0005.69	Hsap_NP_001264890.1	605921	OG0002369	1	TRUE	Hsap_NP_001264890.1
HyS0005.72	Hsap_NP_000282.1	311800	OG0002555	1	TRUE	Hsap_NP_000282.1
HyS0005.75	Hsap_XP_011526969.1	602879	OG0018666
HyS0005.76	Hsap_NP_065825.1	608677	OG0000491	1	TRUE	Hsap_NP_065825.1
HyS0005.77	Hsap_NP_036425.1	605158	OG0000151	4	TRUE	Hsap_NP_000241.1	Hsap_NP_000493.1	Hsap_NP_036425.1	Hsap_XP_024308853.1
HyS0005.79			OG0000253	2		Hsap_NP_001275693.1	Hsap_XP_011536085.1
HyS0005.8			OG0001913	1		Hsap_NP_004259.3
HyS0005.83	Hsap_NP_004332.2	114010	OG0000895	2	TRUE	Hsap_NP_001116105.1	Hsap_NP_004332.2
HyS0005.84			OG0000895	2		Hsap_NP_001116105.1	Hsap_NP_004332.2
HyS0005.87	Hsap_NP_060859.4	605881	OG0003162	1	TRUE	Hsap_NP_060859.4
HyS0005.94			OG0000280	2		Hsap_NP_000624.2	Hsap_NP_001278357.1
HyS0005.95			OG0000280	2		Hsap_NP_000624.2	Hsap_NP_001278357.1
HyS0005.96			OG0000280	2		Hsap_NP_000624.2	Hsap_NP_001278357.1
HyS0005.97			OG0000344	2		Hsap_NP_001274418.1	Hsap_XP_005264641.1
HyS0005.98			OG0000344	2		Hsap_NP_001274418.1	Hsap_XP_005264641.1
HyS0005.99			OG0000344	2		Hsap_NP_001274418.1	Hsap_XP_005264641.1
HyS0006.118			OG0000040	5		Hsap_NP_000383.1	Hsap_XP_011518847.1	Hsap_XP_016873686.1	Hsap_XP_016879285.1	Hsap_XP_024306029.1
HyS0006.121			OG0000040	5		Hsap_NP_000383.1	Hsap_XP_011518847.1	Hsap_XP_016873686.1	Hsap_XP_016879285.1	Hsap_XP_024306029.1
HyS0006.125			OG0000040	5		Hsap_NP_000383.1	Hsap_XP_011518847.1	Hsap_XP_016873686.1	Hsap_XP_016879285.1	Hsap_XP_024306029.1
HyS0006.127			OG0000040	5		Hsap_NP_000383.1	Hsap_XP_011518847.1	Hsap_XP_016873686.1	Hsap_XP_016879285.1	Hsap_XP_024306029.1
HyS0006.130			OG0000040	5		Hsap_NP_000383.1	Hsap_XP_011518847.1	Hsap_XP_016873686.1	Hsap_XP_016879285.1	Hsap_XP_024306029.1
HyS0006.132	Hsap_NP_005641.1	603107	OG0005115	2	TRUE	Hsap_NP_005641.1	Hsap_XP_016879515.1
HyS0006.134	Hsap_NP_002728.1	176960	OG0000432	4	TRUE	Hsap_NP_001303258.1	Hsap_NP_001341605.1	Hsap_NP_002728.1	Hsap_NP_006246.2
HyS0006.14	Hsap_XP_011523684.1	602770	OG0000208	1	TRUE	Hsap_XP_011523684.1
HyS0006.140			OG0005331	1		Hsap_NP_996994.1
HyS0006.141	Hsap_NP_996994.1	609948	OG0005331	1	TRUE	Hsap_NP_996994.1
HyS0006.162			OG0000010	8		Hsap_NP_000499.1	Hsap_NP_003656.2	Hsap_NP_005132.2	Hsap_NP_055310.1	Hsap_NP_061978.6	Hsap_NP_068656.2	Hsap_XP_005272541.1	Hsap_XP_016870167.1
HyS0006.176			OG0000151	4		Hsap_NP_000241.1	Hsap_NP_000493.1	Hsap_NP_036425.1	Hsap_XP_024308853.1
HyS0006.177			OG0000033	3		Hsap_NP_000834.2	Hsap_NP_001171536.1	Hsap_XP_011534084.1
HyS0006.178			OG0000033	3		Hsap_NP_000834.2	Hsap_NP_001171536.1	Hsap_XP_011534084.1
HyS0006.180			OG0000885	1		Hsap_XP_016866433.1
HyS0006.181	Hsap_XP_016866433.1	606702	OG0000885	1	TRUE	Hsap_XP_016866433.1
HyS0006.182			OG0000029	4		Hsap_NP_000171.1	Hsap_NP_001124154.1	Hsap_NP_004954.2	Hsap_XP_024303324.1
HyS0006.183			OG0000796	1		Hsap_NP_001278.1
HyS0006.184			OG0000796	1		Hsap_NP_001278.1
HyS0006.185	Hsap_NP_001080.2	601615	OG0000170	6	TRUE	Hsap_NP_000341.2	Hsap_NP_001080.2	Hsap_NP_758424.1	Hsap_XP_011509253.1	Hsap_XP_016869869.1	Hsap_XP_024307084.1
HyS0006.187	Hsap_NP_002863.1	602049	OG0000300	3	TRUE	Hsap_NP_001782.1	Hsap_NP_002863.1	Hsap_NP_061485.1
HyS0006.196			OG0000300	3		Hsap_NP_001782.1	Hsap_NP_002863.1	Hsap_NP_061485.1
HyS0006.202			OG0000283	1		Hsap_NP_000168.1
HyS0006.207	Hsap_NP_001101.1	602192	OG0000404	2	TRUE	Hsap_NP_001101.1	Hsap_NP_003174.3
HyS0006.208	Hsap_NP_001305436.1	617057	OG0004432	1	TRUE	Hsap_NP_001305436.1
HyS0006.209	Hsap_NP_060420.2	613799	OG0003099	1	TRUE	Hsap_NP_060420.2
HyS0006.21			OG0000388	2		Hsap_NP_001138354.1	Hsap_XP_006724806.1
HyS0006.210			OG0000037	9		Hsap_NP_000803.2	Hsap_NP_000815.1	Hsap_NP_001121117.1	Hsap_NP_001139512.1	Hsap_NP_068711.1	Hsap_NP_068712.1	Hsap_NP_944493.2	Hsap_XP_016856425.1	Hsap_XP_024309731.1
HyS0006.213	Hsap_XP_016867165.1	604368	OG0007214	1	TRUE	Hsap_XP_016867165.1
HyS0006.22			OG0000075	3		Hsap_NP_001310442.1	Hsap_NP_004302.1	Hsap_XP_016856722.1
HyS0006.221			OG0000151	4		Hsap_NP_000241.1	Hsap_NP_000493.1	Hsap_NP_036425.1	Hsap_XP_024308853.1
HyS0006.222			OG0000151	4		Hsap_NP_000241.1	Hsap_NP_000493.1	Hsap_NP_036425.1	Hsap_XP_024308853.1
HyS0006.223			OG0000151	4		Hsap_NP_000241.1	Hsap_NP_000493.1	Hsap_NP_036425.1	Hsap_XP_024308853.1
HyS0006.224			OG0000151	4		Hsap_NP_000241.1	Hsap_NP_000493.1	Hsap_NP_036425.1	Hsap_XP_024308853.1
HyS0006.244			OG0000867	1		Hsap_NP_001035757.1
HyS0006.26	Hsap_NP_057055.2	611974	OG0004927	1	TRUE	Hsap_NP_057055.2
HyS0006.260			OG0000151	4		Hsap_NP_000241.1	Hsap_NP_000493.1	Hsap_NP_036425.1	Hsap_XP_024308853.1
HyS0006.261			OG0000151	4		Hsap_NP_000241.1	Hsap_NP_000493.1	Hsap_NP_036425.1	Hsap_XP_024308853.1
HyS0006.280	Hsap_NP_115569.2	610330	OG0005199	1	TRUE	Hsap_NP_115569.2
HyS0006.281			OG0000146	6		Hsap_NP_001091.1	Hsap_NP_001092.1	Hsap_NP_001186883.1	Hsap_NP_001307784.1	Hsap_NP_001606.1	Hsap_NP_005150.1
HyS0006.282	Hsap_NP_001092.1	102630	OG0000146	6	TRUE	Hsap_NP_001091.1	Hsap_NP_001092.1	Hsap_NP_001186883.1	Hsap_NP_001307784.1	Hsap_NP_001606.1	Hsap_NP_005150.1
HyS0006.283	Hsap_NP_005731.1	610565	OG0000567	1	TRUE	Hsap_NP_005731.1
HyS0006.289	Hsap_XP_011521078.1	611140	OG0004662	1	TRUE	Hsap_XP_011521078.1
HyS0006.292	Hsap_NP_079391.2	614426	OG0005939	1	TRUE	Hsap_NP_079391.2
HyS0006.295	Hsap_NP_001025180.1	603674	OG0004681	1	TRUE	Hsap_NP_001025180.1
HyS0006.310	Hsap_NP_001294.2	602125	OG0003556	1	TRUE	Hsap_NP_001294.2
HyS0006.311			OG0000150	4		Hsap_NP_001035982.1	Hsap_NP_006720.1	Hsap_XP_016877084.1	Hsap_XP_024310152.1
HyS0006.325	Hsap_NP_002462.2	160710	OG0000348	8	TRUE	Hsap_NP_001035203.1	Hsap_NP_002462.2	Hsap_NP_002463.2	Hsap_NP_060004.3	Hsap_XP_011522172.1	Hsap_XP_011525622.1	Hsap_XP_016876829.1	Hsap_XP_016884294.1
HyS0006.326	Hsap_NP_001244941.2	103270	OG0003224	1	TRUE	Hsap_NP_001244941.2
HyS0006.33	Hsap_XP_024306545.1	176790	OG0000453	1	TRUE	Hsap_XP_024306545.1
HyS0006.331	Hsap_NP_001288171.1	601925	OG0003098	1	TRUE	Hsap_NP_001288171.1
HyS0006.332	Hsap_XP_011522005.1	603330	OG0000065	3	TRUE	Hsap_NP_001264044.1	Hsap_XP_011522005.1	Hsap_XP_016861618.1
HyS0006.345	Hsap_NP_758424.1	612503	OG0000170	6	TRUE	Hsap_NP_000341.2	Hsap_NP_001080.2	Hsap_NP_758424.1	Hsap_XP_011509253.1	Hsap_XP_016869869.1	Hsap_XP_024307084.1
HyS0006.381	Hsap_XP_006724169.1	615870	OG0005383	1	TRUE	Hsap_XP_006724169.1
HyS0006.385			OG0000767	1		Hsap_XP_016876625.1
HyS0006.388			OG0000031	14		Hsap_NP_001231739.1	Hsap_NP_001442.2	Hsap_NP_001444.2	Hsap_NP_002006.2	Hsap_NP_004464.2	Hsap_NP_005240.3	Hsap_NP_005242.1	Hsap_NP_036315.1	Hsap_NP_036318.1	Hsap_NP_036320.2	Hsap_NP_075555.1	Hsap_XP_011523661.1	Hsap_XP_016868290.1	Hsap_XP_016885056.1
HyS0006.391			OG0000715	1		Hsap_XP_005263954.1
HyS0006.396	Hsap_NP_005984.3	604649	OG0002101	1	TRUE	Hsap_NP_005984.3
HyS0006.397			OG0002101	1		Hsap_NP_005984.3
HyS0006.398			OG0000146	6		Hsap_NP_001091.1	Hsap_NP_001092.1	Hsap_NP_001186883.1	Hsap_NP_001307784.1	Hsap_NP_001606.1	Hsap_NP_005150.1
HyS0006.399			OG0000011	11		Hsap_NP_001157814.1	Hsap_NP_001316524.1	Hsap_NP_001336347.1	Hsap_NP_005997.2	Hsap_NP_006054.2	Hsap_NP_055612.2	Hsap_NP_059111.2	Hsap_NP_071324.1	Hsap_NP_085127.2	Hsap_NP_689606.2	Hsap_XP_006715816.1
HyS0006.400	Hsap_NP_006850.2	607031	OG0002948	1	TRUE	Hsap_NP_006850.2
HyS0006.401	Hsap_NP_005317.2	138760	OG0001622	2	TRUE	Hsap_NP_005317.2	Hsap_NP_056303.3
HyS0006.402	Hsap_NP_001129131.1	600565	OG0000542	1	TRUE	Hsap_NP_001129131.1
HyS0006.403	Hsap_NP_995322.1	609802	OG0000427	3	TRUE	Hsap_NP_995322.1	Hsap_XP_011534738.1	Hsap_XP_024305871.1
HyS0006.404	Hsap_XP_016881948.1	126380	OG0005112	1	TRUE	Hsap_XP_016881948.1
HyS0006.405	Hsap_XP_024306135.1	145505	OG0005384	1	TRUE	Hsap_XP_024306135.1
HyS0006.408	Hsap_XP_016865476.1	612453	OG0008103
HyS0006.410			OG0000019	10		Hsap_NP_000071.1	Hsap_NP_000733.2	Hsap_NP_000734.2	Hsap_NP_000735.1	Hsap_NP_000736.2	Hsap_NP_000738.2	Hsap_NP_000739.1	Hsap_NP_000742.1	Hsap_NP_005190.4	Hsap_XP_016858745.1
HyS0006.411			OG0000019	10		Hsap_NP_000071.1	Hsap_NP_000733.2	Hsap_NP_000734.2	Hsap_NP_000735.1	Hsap_NP_000736.2	Hsap_NP_000738.2	Hsap_NP_000739.1	Hsap_NP_000742.1	Hsap_NP_005190.4	Hsap_XP_016858745.1
HyS0006.413	Hsap_XP_016868179.1	602686	OG0003287	1	TRUE	Hsap_XP_016868179.1
HyS0006.415			OG0001633	1		Hsap_NP_000654.2
HyS0006.419	Hsap_NP_001243506.2	312173	OG0003919	1	TRUE	Hsap_NP_001243506.2
HyS0006.420	Hsap_XP_011528676.1	616386	OG0000118	2	TRUE	Hsap_NP_694578.1	Hsap_XP_011528676.1
HyS0006.422	Hsap_NP_062559.2	609226	OG0001501	2	TRUE	Hsap_NP_009006.2	Hsap_NP_062559.2
HyS0006.50			OG0000025	3		Hsap_NP_001030.2	Hsap_NP_001153048.1	Hsap_XP_016879014.1
HyS0006.53	Hsap_XP_005257726.1	614404	OG0001382	1	TRUE	Hsap_XP_005257726.1
HyS0006.58			OG0000146	6		Hsap_NP_001091.1	Hsap_NP_001092.1	Hsap_NP_001186883.1	Hsap_NP_001307784.1	Hsap_NP_001606.1	Hsap_NP_005150.1
HyS0006.63	Hsap_NP_057370.1	608347	OG0000087	1	TRUE	Hsap_NP_057370.1
HyS0006.69			OG0000151	4		Hsap_NP_000241.1	Hsap_NP_000493.1	Hsap_NP_036425.1	Hsap_XP_024308853.1
HyS0006.70			OG0002014	3		Hsap_NP_663318.1	Hsap_NP_663693.1	Hsap_XP_016884213.1
HyS0006.72			OG0000151	4		Hsap_NP_000241.1	Hsap_NP_000493.1	Hsap_NP_036425.1	Hsap_XP_024308853.1
HyS0006.79			OG0000533	1		Hsap_NP_002700.1
HyS0006.8			OG0000874	1		Hsap_NP_002755.1
HyS0006.80			OG0000171	7		Hsap_NP_001094.1	Hsap_NP_001245300.2	Hsap_NP_056145.4	Hsap_XP_005251033.1	Hsap_XP_011531017.1	Hsap_XP_016877209.1	Hsap_XP_016882820.1
HyS0006.81	Hsap_NP_001854.1	124089	OG0006010	1	TRUE	Hsap_NP_001854.1
HyS0006.85			OG0000154	2		Hsap_NP_000592.3	Hsap_NP_005568.2
HyS0006.87			OG0000017	11		Hsap_NP_000093.1	Hsap_NP_000095.2	Hsap_NP_000097.3	Hsap_NP_000491.4	Hsap_NP_000753.3	Hsap_NP_000758.1	Hsap_NP_000760.1	Hsap_NP_000761.3	Hsap_NP_000762.2	Hsap_NP_078790.2	Hsap_XP_005262774.1
HyS0006.88			OG0000010	8		Hsap_NP_000499.1	Hsap_NP_003656.2	Hsap_NP_005132.2	Hsap_NP_055310.1	Hsap_NP_061978.6	Hsap_NP_068656.2	Hsap_XP_005272541.1	Hsap_XP_016870167.1
HyS0006.96			OG0000078	6		Hsap_NP_001230526.1	Hsap_NP_005206.2	Hsap_NP_055628.1	Hsap_NP_061928.4	Hsap_NP_071765.2	Hsap_XP_011532283.1
HyS0007.10	Hsap_XP_011517438.1	603722	OG0002791	1	TRUE	Hsap_XP_011517438.1
HyS0007.100	Hsap_XP_011526137.1	616432	OG0000641	3	TRUE	Hsap_NP_945353.1	Hsap_XP_011508441.1	Hsap_XP_011526137.1
HyS0007.101	Hsap_NP_001091952.1	607536	OG0004138	1	TRUE	Hsap_NP_001091952.1
HyS0007.104			OG0000126	1		Hsap_NP_055887.3
HyS0007.106	Hsap_XP_005245370.1	179755	OG0005212	1	TRUE	Hsap_XP_005245370.1
HyS0007.109			OG0000668	1		Hsap_NP_001317692.1
HyS0007.11	Hsap_NP_001273644.1	606830	OG0000813	2	TRUE	Hsap_NP_001273644.1	Hsap_XP_011519528.1
HyS0007.110			OG0000117	8		Hsap_NP_003385.2	Hsap_NP_004616.2	Hsap_NP_005421.1	Hsap_NP_078613.1	Hsap_NP_079492.2	Hsap_NP_110380.1	Hsap_XP_011539899.1	Hsap_XP_016862616.1
HyS0007.115			OG0001559	1		Hsap_NP_006776.1
HyS0007.116			OG0000163	6		Hsap_NP_001123914.1	Hsap_NP_001243750.1	Hsap_NP_002515.1	Hsap_NP_036351.3	Hsap_NP_036382.2	Hsap_NP_203524.1
HyS0007.126			OG0000207	3		Hsap_NP_919253.1	Hsap_XP_011526969.1	Hsap_XP_011539258.1
HyS0007.127	Hsap_NP_079375.3	613129	OG0006383	1	TRUE	Hsap_NP_079375.3
HyS0007.134			OG0000683	1		Hsap_XP_024309849.1
HyS0007.136			OG0005130	1		Hsap_NP_078942.3
HyS0007.141			OG0000683	1		Hsap_XP_024309849.1
HyS0007.143	Hsap_NP_078942.3	614888	OG0005130	1	TRUE	Hsap_NP_078942.3
HyS0007.146			OG0000585	1		Hsap_NP_001185971.1
HyS0007.147	Hsap_NP_004989.2	601479	OG0000350	1	TRUE	Hsap_NP_004989.2
HyS0007.148			OG0001123	2		Hsap_NP_002746.1	Hsap_XP_016882478.1
HyS0007.151			OG0001123	2		Hsap_NP_002746.1	Hsap_XP_016882478.1
HyS0007.16			OG0000307	3		Hsap_NP_005594.1	Hsap_NP_057613.4	Hsap_XP_016884928.1
HyS0007.161			OG0000237	4		Hsap_NP_001238949.1	Hsap_NP_060106.2	Hsap_NP_060132.3	Hsap_XP_016877839.1
HyS0007.162			OG0000020	10		Hsap_NP_001317366.1	Hsap_NP_002818.1	Hsap_NP_002826.3	Hsap_NP_002829.3	Hsap_NP_057051.3	Hsap_NP_109592.1	Hsap_XP_005271136.1	Hsap_XP_016873572.1	Hsap_XP_016874762.1	Hsap_XP_024304527.1
HyS0007.163			OG0000010	8		Hsap_NP_000499.1	Hsap_NP_003656.2	Hsap_NP_005132.2	Hsap_NP_055310.1	Hsap_NP_061978.6	Hsap_NP_068656.2	Hsap_XP_005272541.1	Hsap_XP_016870167.1
HyS0007.165	Hsap_XP_011534212.1	608894	OG0004811	1	TRUE	Hsap_XP_011534212.1
HyS0007.169	Hsap_NP_004935.1	602244	OG0001388	2	TRUE	Hsap_NP_004935.1	Hsap_XP_016878482.1
HyS0007.170			OG0000280	2		Hsap_NP_000624.2	Hsap_NP_001278357.1
HyS0007.171	Hsap_XP_016877462.1	607511	OG0000094	8	TRUE	Hsap_NP_055058.2	Hsap_NP_055059.2	Hsap_NP_112219.3	Hsap_NP_620594.1	Hsap_NP_955387.1	Hsap_XP_005272294.1	Hsap_XP_011507946.1	Hsap_XP_016877462.1
HyS0007.172	Hsap_NP_002056.2	138290	OG0001564	1	TRUE	Hsap_NP_002056.2
HyS0007.174			OG0000064	2		Hsap_NP_001091109.1	Hsap_XP_005259583.1
HyS0007.181	Hsap_XP_016859710.1	610219	OG0006655	2	TRUE	Hsap_XP_016859710.1	Hsap_XP_024302438.1
HyS0007.183	Hsap_NP_000430.3	162150	OG0000221	1	TRUE	Hsap_NP_000430.3
HyS0007.198	Hsap_NP_000851.2	601688	OG0000775	1	TRUE	Hsap_NP_000851.2
HyS0007.2			OG0000162	1		Hsap_NP_000933.1
HyS0007.206			OG0000766	1		Hsap_NP_001544.1
HyS0007.207	Hsap_XP_006719119.1	103950	OG0000153	7	TRUE	Hsap_NP_000055.2	Hsap_NP_001002029.3	Hsap_NP_001304092.1	Hsap_NP_009224.2	Hsap_NP_056507.2	Hsap_XP_006719119.1	Hsap_XP_011518869.1
HyS0007.208			OG0000777	2		Hsap_NP_001309774.1	Hsap_NP_001952.1
HyS0007.21	Hsap_NP_005331.1	601314	OG0001349	1	TRUE	Hsap_NP_005331.1
HyS0007.224	Hsap_XP_011509918.1	603415	OG0000517	9	TRUE	Hsap_NP_000325.4	Hsap_NP_001092874.1	Hsap_NP_001189364.1	Hsap_XP_005265428.1	Hsap_XP_006719619.1	Hsap_XP_011509912.1	Hsap_XP_011509918.1	Hsap_XP_016860146.1	Hsap_XP_016861136.1
HyS0007.229			OG0000352	2		Hsap_XP_005268052.1	Hsap_XP_011534367.1
HyS0007.230			OG0000334	3		Hsap_NP_149109.1	Hsap_XP_011508781.1	Hsap_XP_024309300.1
HyS0007.231			OG0000334	3		Hsap_NP_149109.1	Hsap_XP_011508781.1	Hsap_XP_024309300.1
HyS0007.233			OG0000453	1		Hsap_XP_024306545.1
HyS0007.234			OG0000453	1		Hsap_XP_024306545.1
HyS0007.235			OG0000057	4		Hsap_NP_001304019.1	Hsap_NP_002237.1	Hsap_NP_862823.1	Hsap_XP_011515403.1
HyS0007.237	Hsap_NP_001129711.1	616982	OG0000223	3	TRUE	Hsap_NP_001129711.1	Hsap_NP_067632.2	Hsap_XP_011529864.1
HyS0007.238	Hsap_NP_000498.2	611570	OG0002771	1	TRUE	Hsap_NP_000498.2
HyS0007.244	Hsap_NP_000778.3	609312	OG0000959
HyS0007.246	Hsap_NP_001161067.1	604489	OG0001158	2	TRUE	Hsap_NP_001161067.1	Hsap_XP_011513827.1
HyS0007.248			OG0000899	1		Hsap_NP_004243.1
HyS0007.249			OG0000020	10		Hsap_NP_001317366.1	Hsap_NP_002818.1	Hsap_NP_002826.3	Hsap_NP_002829.3	Hsap_NP_057051.3	Hsap_NP_109592.1	Hsap_XP_005271136.1	Hsap_XP_016873572.1	Hsap_XP_016874762.1	Hsap_XP_024304527.1
HyS0007.250	Hsap_NP_065750.1	614998	OG0004475	1	TRUE	Hsap_NP_065750.1
HyS0007.251	Hsap_XP_024309838.1	134629	OG0003597	1	TRUE	Hsap_XP_024309838.1
HyS0007.26	Hsap_NP_001238949.1	603576	OG0000237	4	TRUE	Hsap_NP_001238949.1	Hsap_NP_060106.2	Hsap_NP_060132.3	Hsap_XP_016877839.1
HyS0007.261			OG0000017	11		Hsap_NP_000093.1	Hsap_NP_000095.2	Hsap_NP_000097.3	Hsap_NP_000491.4	Hsap_NP_000753.3	Hsap_NP_000758.1	Hsap_NP_000760.1	Hsap_NP_000761.3	Hsap_NP_000762.2	Hsap_NP_078790.2	Hsap_XP_005262774.1
HyS0007.265	Hsap_NP_001268357.1	604366	OG0001003	1	TRUE	Hsap_NP_001268357.1
HyS0007.270			OG0000015	4		Hsap_NP_000768.1	Hsap_NP_001159725.1	Hsap_NP_775754.2	Hsap_NP_997235.3
HyS0007.28	Hsap_NP_005096.1	605313	OG0004400	1	TRUE	Hsap_NP_005096.1
HyS0007.289			OG0000090	10		Hsap_NP_001017402.1	Hsap_NP_001098676.2	Hsap_NP_005553.2	Hsap_XP_005265184.1	Hsap_XP_006721658.1	Hsap_XP_011516423.1	Hsap_XP_011523957.1	Hsap_XP_011524280.1	Hsap_XP_016866340.1	Hsap_XP_016867690.1
HyS0007.294			OG0000175	3		Hsap_NP_001121170.1	Hsap_NP_001292204.1	Hsap_NP_001341895.1
HyS0007.295			OG0000068	1		Hsap_NP_001243339.1
HyS0007.301			OG0000011	11		Hsap_NP_001157814.1	Hsap_NP_001316524.1	Hsap_NP_001336347.1	Hsap_NP_005997.2	Hsap_NP_006054.2	Hsap_NP_055612.2	Hsap_NP_059111.2	Hsap_NP_071324.1	Hsap_NP_085127.2	Hsap_NP_689606.2	Hsap_XP_006715816.1
HyS0007.302			OG0000011	11		Hsap_NP_001157814.1	Hsap_NP_001316524.1	Hsap_NP_001336347.1	Hsap_NP_005997.2	Hsap_NP_006054.2	Hsap_NP_055612.2	Hsap_NP_059111.2	Hsap_NP_071324.1	Hsap_NP_085127.2	Hsap_NP_689606.2	Hsap_XP_006715816.1
HyS0007.303	Hsap_XP_006722489.1	606384	OG0000370	3	TRUE	Hsap_NP_001244066.1	Hsap_XP_006712709.1	Hsap_XP_006722489.1
HyS0007.304			OG0005191	1		Hsap_NP_061154.1
HyS0007.305			OG0000370	3		Hsap_NP_001244066.1	Hsap_XP_006712709.1	Hsap_XP_006722489.1
HyS0007.306	Hsap_NP_078954.4	612803	OG0002934
HyS0007.307			OG0000159	14		Hsap_NP_001071121.1	Hsap_NP_001073977.1	Hsap_NP_001103348.1	Hsap_NP_004599.2	Hsap_NP_005140.1	Hsap_NP_005985.3	Hsap_NP_006584.1	Hsap_NP_037483.1	Hsap_NP_057653.3	Hsap_XP_005271218.1	Hsap_XP_011523792.1	Hsap_XP_011534382.1	Hsap_XP_016875401.1	Hsap_XP_016884414.1
HyS0007.309			OG0000159	14		Hsap_NP_001071121.1	Hsap_NP_001073977.1	Hsap_NP_001103348.1	Hsap_NP_004599.2	Hsap_NP_005140.1	Hsap_NP_005985.3	Hsap_NP_006584.1	Hsap_NP_037483.1	Hsap_NP_057653.3	Hsap_XP_005271218.1	Hsap_XP_011523792.1	Hsap_XP_011534382.1	Hsap_XP_016875401.1	Hsap_XP_016884414.1
HyS0007.310			OG0000159	14		Hsap_NP_001071121.1	Hsap_NP_001073977.1	Hsap_NP_001103348.1	Hsap_NP_004599.2	Hsap_NP_005140.1	Hsap_NP_005985.3	Hsap_NP_006584.1	Hsap_NP_037483.1	Hsap_NP_057653.3	Hsap_XP_005271218.1	Hsap_XP_011523792.1	Hsap_XP_011534382.1	Hsap_XP_016875401.1	Hsap_XP_016884414.1
HyS0007.311			OG0000159	14		Hsap_NP_001071121.1	Hsap_NP_001073977.1	Hsap_NP_001103348.1	Hsap_NP_004599.2	Hsap_NP_005140.1	Hsap_NP_005985.3	Hsap_NP_006584.1	Hsap_NP_037483.1	Hsap_NP_057653.3	Hsap_XP_005271218.1	Hsap_XP_011523792.1	Hsap_XP_011534382.1	Hsap_XP_016875401.1	Hsap_XP_016884414.1
HyS0007.313			OG0001089	1		Hsap_NP_001138545.1
HyS0007.325	Hsap_XP_016865675.1	611592	OG0003827	1	TRUE	Hsap_XP_016865675.1
HyS0007.333	Hsap_NP_057714.1	608181	OG0005507	1	TRUE	Hsap_NP_057714.1
HyS0007.338			OG0001389	2		Hsap_NP_001119584.1	Hsap_NP_003713.3
HyS0007.339			OG0001389	2		Hsap_NP_001119584.1	Hsap_NP_003713.3
HyS0007.346			OG0001633	1		Hsap_NP_000654.2
HyS0007.353			OG0000055	5		Hsap_NP_001264055.1	Hsap_NP_004886.3	Hsap_NP_071445.1	Hsap_XP_006720943.2	Hsap_XP_011524898.1
HyS0007.354	Hsap_NP_659457.2	614759	OG0005882	1	TRUE	Hsap_NP_659457.2
HyS0007.362	Hsap_XP_024305871.1	603617	OG0000427	3	TRUE	Hsap_NP_995322.1	Hsap_XP_011534738.1	Hsap_XP_024305871.1
HyS0007.363	Hsap_XP_024302401.1	603961	OG0000361	4	TRUE	Hsap_NP_003603.1	Hsap_NP_036563.1	Hsap_XP_011508174.1	Hsap_XP_024302401.1
HyS0007.364			OG0000019	10		Hsap_NP_000071.1	Hsap_NP_000733.2	Hsap_NP_000734.2	Hsap_NP_000735.1	Hsap_NP_000736.2	Hsap_NP_000738.2	Hsap_NP_000739.1	Hsap_NP_000742.1	Hsap_NP_005190.4	Hsap_XP_016858745.1
HyS0007.366			OG0000004	4		Hsap_NP_001072.2	Hsap_NP_006120.1	Hsap_NP_036596.3	Hsap_NP_113621.1
HyS0007.367			OG0001288	1		Hsap_NP_001719.2
HyS0007.368			OG0000094	8		Hsap_NP_055058.2	Hsap_NP_055059.2	Hsap_NP_112219.3	Hsap_NP_620594.1	Hsap_NP_955387.1	Hsap_XP_005272294.1	Hsap_XP_011507946.1	Hsap_XP_016877462.1
HyS0007.371			OG0000227	1		Hsap_NP_065094.3
HyS0007.372			OG0000227	1		Hsap_NP_065094.3
HyS0007.373	Hsap_NP_037523.2	605849	OG0000653	2	TRUE	Hsap_NP_001128179.1	Hsap_NP_037523.2
HyS0007.376	Hsap_NP_000146.2	606999	OG0004079	1	TRUE	Hsap_NP_000146.2
HyS0007.381			OG0003176	1		Hsap_NP_055782.3
HyS0007.385	Hsap_NP_004609.1	601243	OG0001001	1	TRUE	Hsap_NP_004609.1
HyS0007.386			OG0004308	1		Hsap_NP_001273343.1
HyS0007.387			OG0001001	1		Hsap_NP_004609.1
HyS0007.388	Hsap_NP_001273343.1	609610	OG0004308	1	TRUE	Hsap_NP_001273343.1
HyS0007.396			OG0000052	3		Hsap_XP_006711325.1	Hsap_XP_011537012.1	Hsap_XP_016855798.1
HyS0007.397	Hsap_NP_000117.1	608053	OG0004955	1	TRUE	Hsap_NP_000117.1
HyS0007.40	Hsap_XP_024305442.1	146920	OG0000553	1	TRUE	Hsap_XP_024305442.1
HyS0007.401			OG0000280	2		Hsap_NP_000624.2	Hsap_NP_001278357.1
HyS0007.403	Hsap_NP_006651.2	615611	OG0002925	1	TRUE	Hsap_NP_006651.2
HyS0007.41			OG0000265	3		Hsap_NP_006006.3	Hsap_NP_689854.2	Hsap_XP_011534286.2
HyS0007.410	Hsap_XP_005254312.1	612186	OG0001975	1	TRUE	Hsap_XP_005254312.1
HyS0007.411			OG0000446	1		Hsap_XP_011519666.1
HyS0007.413			OG0001975	1		Hsap_XP_005254312.1
HyS0007.414	Hsap_NP_001243339.1	602207	OG0000068	1	TRUE	Hsap_NP_001243339.1
HyS0007.45			OG0000069	3		Hsap_NP_005870.2	Hsap_NP_899196.1	Hsap_NP_899237.1
HyS0007.46			OG0000055	5		Hsap_NP_001264055.1	Hsap_NP_004886.3	Hsap_NP_071445.1	Hsap_XP_006720943.2	Hsap_XP_011524898.1
HyS0007.47			OG0000055	5		Hsap_NP_001264055.1	Hsap_NP_004886.3	Hsap_NP_071445.1	Hsap_XP_006720943.2	Hsap_XP_011524898.1
HyS0007.48	Hsap_XP_016865452.1	602851	OG0001654	1	TRUE	Hsap_XP_016865452.1
HyS0007.53	Hsap_NP_997235.3	608614	OG0000015	4	TRUE	Hsap_NP_000768.1	Hsap_NP_001159725.1	Hsap_NP_775754.2	Hsap_NP_997235.3
HyS0007.59			OG0000057	4		Hsap_NP_001304019.1	Hsap_NP_002237.1	Hsap_NP_862823.1	Hsap_XP_011515403.1
HyS0007.6			OG0000429	1		Hsap_NP_000534.3
HyS0007.60	Hsap_NP_009190.2	610035	OG0004514	1	TRUE	Hsap_NP_009190.2
HyS0007.62			OG0000280	2		Hsap_NP_000624.2	Hsap_NP_001278357.1
HyS0007.68	Hsap_XP_016870711.1	614730	OG0001289	2	TRUE	Hsap_NP_001120650.1	Hsap_XP_016870711.1
HyS0007.80			OG0000237	4		Hsap_NP_001238949.1	Hsap_NP_060106.2	Hsap_NP_060132.3	Hsap_XP_016877839.1
HyS0008.104	Hsap_NP_067045.1	617413	OG0001497	2	TRUE	Hsap_NP_067045.1	Hsap_NP_149053.1
HyS0008.107	Hsap_XP_011509774.1	611472	OG0005860	1	TRUE	Hsap_XP_011509774.1
HyS0008.109			OG0000052	3		Hsap_XP_006711325.1	Hsap_XP_011537012.1	Hsap_XP_016855798.1
HyS0008.116			OG0000165	4		Hsap_NP_001230937.1	Hsap_NP_006603.2	Hsap_NP_055690.1	Hsap_NP_055889.2
HyS0008.117			OG0000087	1		Hsap_NP_057370.1
HyS0008.118	Hsap_XP_024306320.1	608439	OG0002977	1	TRUE	Hsap_XP_024306320.1
HyS0008.120			OG0000161	4		Hsap_NP_000066.1	Hsap_NP_001138778.1	Hsap_NP_004926.1	Hsap_XP_016868239.1
HyS0008.121			OG0000068	1		Hsap_NP_001243339.1
HyS0008.14	Hsap_NP_076424.1	616177	OG0005206	1	TRUE	Hsap_NP_076424.1
HyS0008.140			OG0001655	1		Hsap_NP_071415.1
HyS0008.150	Hsap_NP_647473.1	607472	OG0002402	1	TRUE	Hsap_NP_647473.1
HyS0008.151			OG0000732	2		Hsap_NP_000330.2	Hsap_XP_005254663.1
HyS0008.152	Hsap_XP_005254663.1	600839	OG0000732	2	TRUE	Hsap_NP_000330.2	Hsap_XP_005254663.1
HyS0008.157			OG0000963	2		Hsap_NP_001135858.1	Hsap_NP_005872.2
HyS0008.158	Hsap_NP_001135858.1	300906	OG0000963	2	TRUE	Hsap_NP_001135858.1	Hsap_NP_005872.2
HyS0008.162			OG0000350	1		Hsap_NP_004989.2
HyS0008.163			OG0003912	1		Hsap_NP_055929.1
HyS0008.164			OG0000179	1		Hsap_XP_011521787.1
HyS0008.166			OG0000179	1		Hsap_XP_011521787.1
HyS0008.167	Hsap_NP_055929.1	616062	OG0003912	1	TRUE	Hsap_NP_055929.1
HyS0008.170			OG0000350	1		Hsap_NP_004989.2
HyS0008.183			OG0000050	1		Hsap_NP_001336091.1
HyS0008.184			OG0000050	1		Hsap_NP_001336091.1
HyS0008.185			OG0000050	1		Hsap_NP_001336091.1
HyS0008.186			OG0000050	1		Hsap_NP_001336091.1
HyS0008.190			OG0000050	1		Hsap_NP_001336091.1
HyS0008.191			OG0000050	1		Hsap_NP_001336091.1
HyS0008.198			OG0000189	1		Hsap_XP_011544242.2
HyS0008.199			OG0000014	18		Hsap_NP_000450.2	Hsap_NP_001341913.1	Hsap_NP_002244.1	Hsap_NP_002520.2	Hsap_NP_004110.2	Hsap_NP_004551.2	Hsap_NP_005003.2	Hsap_NP_006171.2	Hsap_NP_006334.2	Hsap_NP_066124.1	Hsap_XP_005252051.1	Hsap_XP_005265227.2	Hsap_XP_006713931.1	Hsap_XP_006717771.1	Hsap_XP_011507889.1	Hsap_XP_011514525.1	Hsap_XP_011532780.1	Hsap_XP_011542745.1
HyS0008.200			OG0000189	1		Hsap_XP_011544242.2
HyS0008.203			OG0000104	3		Hsap_NP_058634.4	Hsap_XP_005264262.1	Hsap_XP_011534658.1
HyS0008.210			OG0000037	9		Hsap_NP_000803.2	Hsap_NP_000815.1	Hsap_NP_001121117.1	Hsap_NP_001139512.1	Hsap_NP_068711.1	Hsap_NP_068712.1	Hsap_NP_944493.2	Hsap_XP_016856425.1	Hsap_XP_024309731.1
HyS0008.215	Hsap_NP_001310442.1	608845	OG0000075	3	TRUE	Hsap_NP_001310442.1	Hsap_NP_004302.1	Hsap_XP_016856722.1
HyS0008.217			OG0000291	2		Hsap_NP_001244127.1	Hsap_XP_005262538.1
HyS0008.219			OG0000302	4		Hsap_NP_000477.1	Hsap_NP_001316801.1	Hsap_NP_001642.1	Hsap_NP_036196.1
HyS0008.220			OG0000075	3		Hsap_NP_001310442.1	Hsap_NP_004302.1	Hsap_XP_016856722.1
HyS0008.222			OG0000064	2		Hsap_NP_001091109.1	Hsap_XP_005259583.1
HyS0008.223			OG0000069	3		Hsap_NP_005870.2	Hsap_NP_899196.1	Hsap_NP_899237.1
HyS0008.224			OG0003528	1		Hsap_NP_076915.2
HyS0008.225			OG0000057	4		Hsap_NP_001304019.1	Hsap_NP_002237.1	Hsap_NP_862823.1	Hsap_XP_011515403.1
HyS0008.226	Hsap_NP_076915.2	602568	OG0003528	1	TRUE	Hsap_NP_076915.2
HyS0008.227			OG0003383	1		Hsap_NP_060311.1
HyS0008.228	Hsap_NP_060311.1	613019	OG0003383	1	TRUE	Hsap_NP_060311.1
HyS0008.229	Hsap_NP_079029.3	612014	OG0002856	2	TRUE	Hsap_NP_079029.3	Hsap_XP_005264978.1
HyS0008.231			OG0000602	1		Hsap_XP_011526147.1
HyS0008.232			OG0001955	1		Hsap_NP_005350.1
HyS0008.234			OG0000010	8		Hsap_NP_000499.1	Hsap_NP_003656.2	Hsap_NP_005132.2	Hsap_NP_055310.1	Hsap_NP_061978.6	Hsap_NP_068656.2	Hsap_XP_005272541.1	Hsap_XP_016870167.1
HyS0008.24			OG0000732	2		Hsap_NP_000330.2	Hsap_XP_005254663.1
HyS0008.241	Hsap_NP_005893.1	603109	OG0000834	2	TRUE	Hsap_NP_005893.1	Hsap_XP_006719890.1
HyS0008.242			OG0000834	2		Hsap_NP_005893.1	Hsap_XP_006719890.1
HyS0008.246			OG0000209	2		Hsap_NP_001030025.1	Hsap_NP_001339431.1
HyS0008.248	Hsap_NP_001094896.1	614631	OG0006594	1	TRUE	Hsap_NP_001094896.1
HyS0008.25			OG0000024	2		Hsap_NP_001138724.1	Hsap_NP_114141.2
HyS0008.253	Hsap_NP_001336851.1	607526	OG0004161	1	TRUE	Hsap_NP_001336851.1
HyS0008.255	Hsap_NP_001317217.1	601734	OG0002176	1	TRUE	Hsap_NP_001317217.1
HyS0008.262			OG0000037	9		Hsap_NP_000803.2	Hsap_NP_000815.1	Hsap_NP_001121117.1	Hsap_NP_001139512.1	Hsap_NP_068711.1	Hsap_NP_068712.1	Hsap_NP_944493.2	Hsap_XP_016856425.1	Hsap_XP_024309731.1
HyS0008.267			OG0000024	2		Hsap_NP_001138724.1	Hsap_NP_114141.2
HyS0008.273			OG0000657	3		Hsap_NP_001308307.1	Hsap_XP_006713721.1	Hsap_XP_016856970.1
HyS0008.296			OG0000102	2		Hsap_NP_078918.3	Hsap_XP_005246506.1
HyS0008.297			OG0000052	3		Hsap_XP_006711325.1	Hsap_XP_011537012.1	Hsap_XP_016855798.1
HyS0008.298			OG0000376	2		Hsap_NP_001813.1	Hsap_NP_065805.2
HyS0008.305			OG0000208	1		Hsap_XP_011523684.1
HyS0008.312			OG0000453	1		Hsap_XP_024306545.1
HyS0008.321	Hsap_XP_005257419.1	157140	OG0009955
HyS0008.322			OG0000186	3		Hsap_NP_071881.1	Hsap_XP_011530722.1	Hsap_XP_011531331.1
HyS0008.323	Hsap_XP_005271770.1	618058	OG0006331	1	TRUE	Hsap_XP_005271770.1
HyS0008.324	Hsap_NP_001231509.1	603015	OG0001483	1	TRUE	Hsap_NP_001231509.1
HyS0008.325			OG0000302	4		Hsap_NP_000477.1	Hsap_NP_001316801.1	Hsap_NP_001642.1	Hsap_NP_036196.1
HyS0008.326			OG0000302	4		Hsap_NP_000477.1	Hsap_NP_001316801.1	Hsap_NP_001642.1	Hsap_NP_036196.1
HyS0008.327	Hsap_NP_066990.3	614518	OG0005818	1	TRUE	Hsap_NP_066990.3
HyS0008.328	Hsap_NP_078940.2	609853	OG0004603	1	TRUE	Hsap_NP_078940.2
HyS0008.33			OG0000102	2		Hsap_NP_078918.3	Hsap_XP_005246506.1
HyS0008.331	Hsap_XP_005247134.1	600293	OG0000343	4	TRUE	Hsap_NP_066939.1	Hsap_XP_005247134.1	Hsap_XP_006719273.1	Hsap_XP_011530791.1
HyS0008.337			OG0000409	2		Hsap_NP_001129172.1	Hsap_NP_036611.2
HyS0008.338	Hsap_NP_689597.1	603650	OG0005429	1	TRUE	Hsap_NP_689597.1
HyS0008.34	Hsap_NP_003629.2	604063	OG0000290	6	TRUE	Hsap_NP_000410.2	Hsap_NP_001073286.1	Hsap_NP_002194.2	Hsap_NP_002195.1	Hsap_NP_003629.2	Hsap_XP_005268896.1
HyS0008.340	Hsap_NP_443091.1	611908	OG0004771	1	TRUE	Hsap_NP_443091.1
HyS0008.342	Hsap_NP_660305.2	610516	OG0004200	1	TRUE	Hsap_NP_660305.2
HyS0008.344	Hsap_NP_001813.1	118423	OG0000376	2	TRUE	Hsap_NP_001813.1	Hsap_NP_065805.2
HyS0008.346			OG0000821	1		Hsap_NP_001308154.1
HyS0008.349			OG0000027	7		Hsap_NP_000249.1	Hsap_NP_001292553.1	Hsap_NP_001305425.1	Hsap_NP_524144.1	Hsap_XP_006720321.1	Hsap_XP_011543483.1	Hsap_XP_016880172.1
HyS0008.354			OG0002271	1		Hsap_NP_002383.2
HyS0008.355	Hsap_NP_002383.2	164785	OG0002271	1	TRUE	Hsap_NP_002383.2
HyS0008.358			OG0000062	3		Hsap_NP_000288.1	Hsap_XP_016867287.1	Hsap_XP_024306066.1
HyS0008.360	Hsap_XP_016864335.1	616899	OG0004045	1	TRUE	Hsap_XP_016864335.1
HyS0008.362			OG0000318	9		Hsap_NP_000079.2	Hsap_NP_000080.2	Hsap_NP_000081.1	Hsap_NP_000384.2	Hsap_NP_001265003.1	Hsap_NP_116277.2	Hsap_NP_542411.2	Hsap_XP_016855823.1	Hsap_XP_016874317.1
HyS0008.363			OG0003854	1		Hsap_XP_011509246.1
HyS0008.364			OG0000311	10		Hsap_NP_001020018.1	Hsap_NP_001070869.1	Hsap_NP_001195.2	Hsap_NP_001243722.1	Hsap_NP_001293139.1	Hsap_NP_001334595.1	Hsap_NP_064733.3	Hsap_XP_005265640.1	Hsap_XP_011536475.1	Hsap_XP_011538406.1
HyS0008.369			OG0000155	3		Hsap_NP_000546.2	Hsap_XP_011528141.1	Hsap_XP_016869210.1
HyS0008.372			OG0000767	1		Hsap_XP_016876625.1
HyS0008.373			OG0000767	1		Hsap_XP_016876625.1
HyS0008.374			OG0000767	1		Hsap_XP_016876625.1
HyS0008.375	Hsap_NP_000543.2	613160	OG0000088	6	TRUE	Hsap_NP_000543.2	Hsap_NP_001264198.1	Hsap_NP_002449.2	Hsap_NP_005413.2	Hsap_NP_597725.1	Hsap_XP_005268859.1
HyS0008.376			OG0002782	1		Hsap_NP_004981.2
HyS0008.40	Hsap_NP_066552.2	600532	OG0004533	1	TRUE	Hsap_NP_066552.2
HyS0008.402			OG0000025	3		Hsap_NP_001030.2	Hsap_NP_001153048.1	Hsap_XP_016879014.1
HyS0008.404			OG0000027	7		Hsap_NP_000249.1	Hsap_NP_001292553.1	Hsap_NP_001305425.1	Hsap_NP_524144.1	Hsap_XP_006720321.1	Hsap_XP_011543483.1	Hsap_XP_016880172.1
HyS0008.432			OG0003733	1		Hsap_XP_016866397.1
HyS0008.44			OG0000361	4		Hsap_NP_003603.1	Hsap_NP_036563.1	Hsap_XP_011508174.1	Hsap_XP_024302401.1
HyS0008.56			OG0000659	1		Hsap_NP_001303969.1
HyS0008.59	Hsap_NP_001091896.1	601736	OG0002672	1	TRUE	Hsap_NP_001091896.1
HyS0008.63			OG0000786	1		Hsap_XP_005252017.1
HyS0008.66			OG0000240	3		Hsap_NP_000689.1	Hsap_NP_001130.1	Hsap_NP_001159432.1
HyS0008.67			OG0000786	1		Hsap_XP_005252017.1
HyS0008.70			OG0000240	3		Hsap_NP_000689.1	Hsap_NP_001130.1	Hsap_NP_001159432.1
HyS0008.74	Hsap_NP_835455.1	607194	OG0000046	12	TRUE	Hsap_NP_000465.1	Hsap_NP_001004311.2	Hsap_NP_002491.2	Hsap_NP_004307.2	Hsap_NP_005412.1	Hsap_NP_006151.3	Hsap_NP_476527.1	Hsap_NP_660161.1	Hsap_NP_835455.1	Hsap_XP_016857678.1	Hsap_XP_016871769.1	Hsap_XP_024307284.1
HyS0008.82	Hsap_NP_001030.2	600761	OG0000025	3	TRUE	Hsap_NP_001030.2	Hsap_NP_001153048.1	Hsap_XP_016879014.1
HyS0008.83	Hsap_NP_036292.2	605654	OG0004143
HyS0008.84	Hsap_NP_001073286.1	147556	OG0000290	6	TRUE	Hsap_NP_000410.2	Hsap_NP_001073286.1	Hsap_NP_002194.2	Hsap_NP_002195.1	Hsap_NP_003629.2	Hsap_XP_005268896.1
HyS0008.85	Hsap_NP_524144.1	160780	OG0000027	7	TRUE	Hsap_NP_000249.1	Hsap_NP_001292553.1	Hsap_NP_001305425.1	Hsap_NP_524144.1	Hsap_XP_006720321.1	Hsap_XP_011543483.1	Hsap_XP_016880172.1
HyS0008.93	Hsap_NP_036565.2	605590	OG0003365	1	TRUE	Hsap_NP_036565.2
HyS0009.108			OG0000302	4		Hsap_NP_000477.1	Hsap_NP_001316801.1	Hsap_NP_001642.1	Hsap_NP_036196.1
HyS0009.110			OG0000038	20		Hsap_NP_000316.2	Hsap_NP_000442.1	Hsap_NP_000545.1	Hsap_NP_001306003.1	Hsap_NP_002644.4	Hsap_NP_003856.1	Hsap_NP_003915.2	Hsap_NP_005020.1	Hsap_NP_005160.2	Hsap_NP_006252.3	Hsap_NP_006483.2	Hsap_NP_008913.2	Hsap_NP_038463.2	Hsap_NP_055403.2	Hsap_NP_068374.1	Hsap_NP_068745.2	Hsap_NP_073207.1	Hsap_NP_620689.1	Hsap_NP_776248.1	Hsap_NP_878314.1
HyS0009.114			OG0000567	1		Hsap_NP_005731.1
HyS0009.12	Hsap_XP_011528306.1	616661	OG0001707	1	TRUE	Hsap_XP_011528306.1
HyS0009.124	Hsap_NP_631961.1	601574	OG0002567	3	TRUE	Hsap_NP_004951.1	Hsap_NP_631961.1	Hsap_XP_011528297.1
HyS0009.125			OG0000027	7		Hsap_NP_000249.1	Hsap_NP_001292553.1	Hsap_NP_001305425.1	Hsap_NP_524144.1	Hsap_XP_006720321.1	Hsap_XP_011543483.1	Hsap_XP_016880172.1
HyS0009.13			OG0001384	1		Hsap_NP_569157.2
HyS0009.14			OG0001329	1		Hsap_NP_006585.2
HyS0009.143			OG0000030	1		Hsap_XP_016877107.1
HyS0009.15	Hsap_NP_006436.3	607300	OG0002986	1	TRUE	Hsap_NP_006436.3
HyS0009.150			OG0002467	1		Hsap_NP_733746.1
HyS0009.163			OG0000015	4		Hsap_NP_000768.1	Hsap_NP_001159725.1	Hsap_NP_775754.2	Hsap_NP_997235.3
HyS0009.185			OG0005340	2		Hsap_NP_001288268.1	Hsap_NP_001307256.1
HyS0009.190			OG0000547	1		Hsap_XP_011543857.1
HyS0009.198	Hsap_NP_001374.3	603527	OG0004631	1	TRUE	Hsap_NP_001374.3
HyS0009.199			OG0001780	1		Hsap_NP_008976.1
HyS0009.201			OG0000007	12		Hsap_NP_000015.1	Hsap_NP_000016.1	Hsap_NP_000515.2	Hsap_NP_000612.1	Hsap_NP_000673.2	Hsap_NP_000674.2	Hsap_NP_000675.1	Hsap_NP_000788.2	Hsap_NP_000789.1	Hsap_NP_001277738.1	Hsap_NP_473362.1	Hsap_XP_016855642.1
HyS0009.204			OG0000035	9		Hsap_NP_000208.2	Hsap_NP_001106212.1	Hsap_NP_002224.1	Hsap_NP_002225.2	Hsap_NP_004965.1	Hsap_NP_004968.2	Hsap_NP_598004.1	Hsap_XP_005270908.1	Hsap_XP_011527101.1
HyS0009.205			OG0000009	3		Hsap_NP_150241.2	Hsap_XP_005251870.1	Hsap_XP_006714220.1
HyS0009.21			OG0000154	2		Hsap_NP_000592.3	Hsap_NP_005568.2
HyS0009.211	Hsap_NP_068761.4	614138	OG0002334	1	TRUE	Hsap_NP_068761.4
HyS0009.215	Hsap_NP_569733.2	608047	OG0000928	1	TRUE	Hsap_NP_569733.2
HyS0009.222	Hsap_XP_006716601.2	614930	OG0006257	1	TRUE	Hsap_XP_006716601.2
HyS0009.225	Hsap_NP_005565.2	180385	OG0000157	5	TRUE	Hsap_NP_001167617.1	Hsap_NP_005565.2	Hsap_NP_055379.1	Hsap_NP_203129.1	Hsap_XP_006718291.1
HyS0009.229			OG0000007	12		Hsap_NP_000015.1	Hsap_NP_000016.1	Hsap_NP_000515.2	Hsap_NP_000612.1	Hsap_NP_000673.2	Hsap_NP_000674.2	Hsap_NP_000675.1	Hsap_NP_000788.2	Hsap_NP_000789.1	Hsap_NP_001277738.1	Hsap_NP_473362.1	Hsap_XP_016855642.1
HyS0009.231	Hsap_XP_016884501.1	607295	OG0002714	1	TRUE	Hsap_XP_016884501.1
HyS0009.232	Hsap_NP_005139.1	604011	OG0004778	1	TRUE	Hsap_NP_005139.1
HyS0009.236			OG0000062	3		Hsap_NP_000288.1	Hsap_XP_016867287.1	Hsap_XP_024306066.1
HyS0009.244	Hsap_XP_006722064.1	602774	OG0000357	4	TRUE	Hsap_NP_001136043.1	Hsap_NP_001157741.1	Hsap_XP_005268103.1	Hsap_XP_006722064.1
HyS0009.248			OG0000154	2		Hsap_NP_000592.3	Hsap_NP_005568.2
HyS0009.250			OG0000154	2		Hsap_NP_000592.3	Hsap_NP_005568.2
HyS0009.255	Hsap_NP_001186220.1	601860	OG0002112	1	TRUE	Hsap_NP_001186220.1
HyS0009.256			OG0000047	10		Hsap_NP_001003841.1	Hsap_NP_001010898.1	Hsap_NP_001035.1	Hsap_NP_001036.1	Hsap_NP_004202.3	Hsap_NP_005620.1	Hsap_NP_064593.1	Hsap_NP_964012.2	Hsap_XP_005265468.1	Hsap_XP_011521597.1
HyS0009.257			OG0000585	1		Hsap_NP_001185971.1
HyS0009.259			OG0000322	2		Hsap_XP_006716091.1	Hsap_XP_016869431.1
HyS0009.264	Hsap_XP_011522034.1	609523	OG0001387	1	TRUE	Hsap_XP_011522034.1
HyS0009.272	Hsap_NP_203129.1	602146	OG0000157	5	TRUE	Hsap_NP_001167617.1	Hsap_NP_005565.2	Hsap_NP_055379.1	Hsap_NP_203129.1	Hsap_XP_006718291.1
HyS0009.280			OG0003145	2		Hsap_NP_000346.2	Hsap_NP_005133.2
HyS0009.288			OG0004630	1		Hsap_NP_001171481.1
HyS0009.290			OG0000026	4		Hsap_NP_001073327.1	Hsap_XP_006715579.1	Hsap_XP_011521763.1	Hsap_XP_011526250.1
HyS0009.295			OG0004630	1		Hsap_NP_001171481.1
HyS0009.297	Hsap_NP_001171481.1	603465	OG0004630	1	TRUE	Hsap_NP_001171481.1
HyS0009.298			OG0000026	4		Hsap_NP_001073327.1	Hsap_XP_006715579.1	Hsap_XP_011521763.1	Hsap_XP_011526250.1
HyS0009.30	Hsap_NP_073740.2	606411	OG0000393	2	TRUE	Hsap_NP_073740.2	Hsap_NP_808218.1
HyS0009.302	Hsap_XP_011523259.1	609883	OG0005170	1	TRUE	Hsap_XP_011523259.1
HyS0009.305	Hsap_NP_003312.3	602389	OG0001895	1	TRUE	Hsap_NP_003312.3
HyS0009.308	Hsap_NP_000220.1	606967	OG0001102	1	TRUE	Hsap_NP_000220.1
HyS0009.312			OG0002891	1		Hsap_XP_005256079.1
HyS0009.313			OG0001185	1		Hsap_XP_016878375.1
HyS0009.321			OG0000050	1		Hsap_NP_001336091.1
HyS0009.322			OG0000050	1		Hsap_NP_001336091.1
HyS0009.329	Hsap_XP_016876453.1	610397	OG0005325	1	TRUE	Hsap_XP_016876453.1
HyS0009.334			OG0000355	2		Hsap_NP_000361.1	Hsap_XP_016877949.1
HyS0009.337	Hsap_XP_011523257.1	612482	OG0007639	1	TRUE	Hsap_XP_011523257.1
HyS0009.338	Hsap_XP_011509306.1	612636	OG0001840	1	TRUE	Hsap_XP_011509306.1
HyS0009.339	Hsap_XP_016863143.1	604604	OG0003382	1	TRUE	Hsap_XP_016863143.1
HyS0009.342	Hsap_NP_001316801.1	107776	OG0000302	4	TRUE	Hsap_NP_000477.1	Hsap_NP_001316801.1	Hsap_NP_001642.1	Hsap_NP_036196.1
HyS0009.345	Hsap_NP_056449.1	609367	OG0005288	1	TRUE	Hsap_NP_056449.1
HyS0009.346			OG0000287	2		Hsap_NP_057240.3	Hsap_XP_011529474.1
HyS0009.347	Hsap_NP_001336091.1	603094	OG0000050	1	TRUE	Hsap_NP_001336091.1
HyS0009.349			OG0000930	1		Hsap_NP_002920.1
HyS0009.35	Hsap_NP_919299.3	610308	OG0005294	1	TRUE	Hsap_NP_919299.3
HyS0009.350	Hsap_NP_005872.2	614901	OG0000963	2	TRUE	Hsap_NP_001135858.1	Hsap_NP_005872.2
HyS0009.351	Hsap_NP_003611.1	605100	OG0003072	1	TRUE	Hsap_NP_003611.1
HyS0009.352			OG0000169	1		Hsap_NP_055105.2
HyS0009.357	Hsap_NP_001339191.1	610622	OG0006283	1	TRUE	Hsap_NP_001339191.1
HyS0009.359	Hsap_XP_005270614.1	610860	OG0002543	1	TRUE	Hsap_XP_005270614.1
HyS0009.36	Hsap_NP_001121082.1	602938	OG0000843	1	TRUE	Hsap_NP_001121082.1
HyS0009.360	Hsap_NP_006653.2	611421	OG0002305	1	TRUE	Hsap_NP_006653.2
HyS0009.362	Hsap_NP_001120650.1	616918	OG0001289	2	TRUE	Hsap_NP_001120650.1	Hsap_XP_016870711.1
HyS0009.365	Hsap_XP_006721010.1	614574	OG0005891	1	TRUE	Hsap_XP_006721010.1
HyS0009.366	Hsap_NP_057419.4	606810	OG0001442	1	TRUE	Hsap_NP_057419.4
HyS0009.368			OG0000070	4		Hsap_NP_001804.2	Hsap_NP_004514.2	Hsap_NP_036442.3	Hsap_XP_011519833.1
HyS0009.370			OG0000134	4		Hsap_NP_001186326.1	Hsap_NP_001316166.1	Hsap_NP_002488.1	Hsap_XP_011522940.1
HyS0009.371			OG0000033	3		Hsap_NP_000834.2	Hsap_NP_001171536.1	Hsap_XP_011534084.1
HyS0009.376			OG0000134	4		Hsap_NP_001186326.1	Hsap_NP_001316166.1	Hsap_NP_002488.1	Hsap_XP_011522940.1
HyS0009.377			OG0000033	3		Hsap_NP_000834.2	Hsap_NP_001171536.1	Hsap_XP_011534084.1
HyS0009.38	Hsap_XP_024306342.1	612584	OG0001160	1	TRUE	Hsap_XP_024306342.1
HyS0009.43	Hsap_NP_001136043.1	602954	OG0000357	4	TRUE	Hsap_NP_001136043.1	Hsap_NP_001157741.1	Hsap_XP_005268103.1	Hsap_XP_006722064.1
HyS0009.44			OG0003145	2		Hsap_NP_000346.2	Hsap_NP_005133.2
HyS0009.53	Hsap_NP_001921.1	600944	OG0003450	1	TRUE	Hsap_NP_001921.1
HyS0009.60			OG0000008	20		Hsap_NP_000200.1	Hsap_NP_001073136.1	Hsap_NP_001106175.1	Hsap_NP_001129743.2	Hsap_NP_001180.1	Hsap_NP_002135.2	Hsap_NP_002139.2	Hsap_NP_002439.2	Hsap_NP_002440.2	Hsap_NP_004089.1	Hsap_NP_004378.1	Hsap_NP_004518.1	Hsap_NP_005211.1	Hsap_NP_005212.1	Hsap_NP_005506.3	Hsap_NP_005513.1	Hsap_NP_006726.1	Hsap_NP_061815.2	Hsap_NP_612138.1	Hsap_XP_016872278.1
HyS0009.61			OG0000345	2		Hsap_NP_000535.3	Hsap_NP_000584.2
HyS0009.63	Hsap_XP_011516672.1	607440	OG0002789	1	TRUE	Hsap_XP_011516672.1
HyS0009.65	Hsap_NP_001309070.1	616830	OG0002922	1	TRUE	Hsap_NP_001309070.1
HyS0009.67			OG0000052	3		Hsap_XP_006711325.1	Hsap_XP_011537012.1	Hsap_XP_016855798.1
HyS0009.70			OG0000051	3		Hsap_NP_004347.1	Hsap_NP_004606.2	Hsap_NP_620599.1
HyS0009.71	Hsap_XP_005271831.1	172480	OG0004505	1	TRUE	Hsap_XP_005271831.1
HyS0009.75			OG0000027	7		Hsap_NP_000249.1	Hsap_NP_001292553.1	Hsap_NP_001305425.1	Hsap_NP_524144.1	Hsap_XP_006720321.1	Hsap_XP_011543483.1	Hsap_XP_016880172.1
HyS0009.87			OG0000857	1		Hsap_XP_005262053.1
HyS0009.89			OG0000172	2		Hsap_NP_001338233.1	Hsap_NP_038265.2
HyS0009.90	Hsap_NP_001121631.1	615850	OG0002786	1	TRUE	Hsap_NP_001121631.1
HyS0009.94	Hsap_NP_060921.3	609279	OG0003299	1	TRUE	Hsap_NP_060921.3
HyS0009.95	Hsap_NP_116179.2	610277	OG0003076	1	TRUE	Hsap_NP_116179.2
HyS0009.96			OG0000857	1		Hsap_XP_005262053.1
HyS0010.100	Hsap_XP_006724687.1	300576	OG0002152	1	TRUE	Hsap_XP_006724687.1
HyS0010.101	Hsap_XP_005263430.1	606453	OG0000226	4	TRUE	Hsap_XP_005263430.1	Hsap_XP_011530059.1	Hsap_XP_011542334.1	Hsap_XP_016861499.1
HyS0010.102			OG0000026	4		Hsap_NP_001073327.1	Hsap_XP_006715579.1	Hsap_XP_011521763.1	Hsap_XP_011526250.1
HyS0010.103			OG0002939	1		Hsap_NP_660312.2
HyS0010.106	Hsap_NP_079285.2	611423	OG0002911	2	TRUE	Hsap_NP_079285.2	Hsap_XP_011510236.1
HyS0010.122			OG0000051	3		Hsap_NP_004347.1	Hsap_NP_004606.2	Hsap_NP_620599.1
HyS0010.123	Hsap_NP_057937.1	136430	OG0001540	1	TRUE	Hsap_NP_057937.1
HyS0010.124	Hsap_NP_073562.1	613897	OG0007757	1	TRUE	Hsap_NP_073562.1
HyS0010.131			OG0003604	1		Hsap_NP_006547.1
HyS0010.132	Hsap_NP_006547.1	607622	OG0003604	1	TRUE	Hsap_NP_006547.1
HyS0010.135			OG0000029	4		Hsap_NP_000171.1	Hsap_NP_001124154.1	Hsap_NP_004954.2	Hsap_XP_024303324.1
HyS0010.136			OG0000029	4		Hsap_NP_000171.1	Hsap_NP_001124154.1	Hsap_NP_004954.2	Hsap_XP_024303324.1
HyS0010.139			OG0000398	1		Hsap_NP_001243371.1
HyS0010.140	Hsap_NP_000018.2	613228	OG0002070	1	TRUE	Hsap_NP_000018.2
HyS0010.142			OG0001388	2		Hsap_NP_004935.1	Hsap_XP_016878482.1
HyS0010.146			OG0000003	12		Hsap_NP_000570.1	Hsap_NP_000625.1	Hsap_NP_001050.1	Hsap_NP_001116513.2	Hsap_NP_001155969.1	Hsap_NP_001164645.1	Hsap_NP_001166031.1	Hsap_NP_001334985.1	Hsap_NP_004826.5	Hsap_NP_115940.2	Hsap_NP_940799.1	Hsap_XP_011515565.1
HyS0010.148			OG0000003	12		Hsap_NP_000570.1	Hsap_NP_000625.1	Hsap_NP_001050.1	Hsap_NP_001116513.2	Hsap_NP_001155969.1	Hsap_NP_001164645.1	Hsap_NP_001166031.1	Hsap_NP_001334985.1	Hsap_NP_004826.5	Hsap_NP_115940.2	Hsap_NP_940799.1	Hsap_XP_011515565.1
HyS0010.150	Hsap_XP_006717743.1	601810	OG0002739	1	TRUE	Hsap_XP_006717743.1
HyS0010.155			OG0000020	10		Hsap_NP_001317366.1	Hsap_NP_002818.1	Hsap_NP_002826.3	Hsap_NP_002829.3	Hsap_NP_057051.3	Hsap_NP_109592.1	Hsap_XP_005271136.1	Hsap_XP_016873572.1	Hsap_XP_016874762.1	Hsap_XP_024304527.1
HyS0010.156			OG0000047	10		Hsap_NP_001003841.1	Hsap_NP_001010898.1	Hsap_NP_001035.1	Hsap_NP_001036.1	Hsap_NP_004202.3	Hsap_NP_005620.1	Hsap_NP_064593.1	Hsap_NP_964012.2	Hsap_XP_005265468.1	Hsap_XP_011521597.1
HyS0010.159			OG0002678	1		Hsap_NP_001473.1
HyS0010.16	Hsap_XP_011534258.1	610564	OG0001231	2	TRUE	Hsap_NP_055132.2	Hsap_XP_011534258.1
HyS0010.160			OG0000589	1		Hsap_NP_848549.3
HyS0010.161			OG0001018	1		Hsap_NP_000375.2
HyS0010.162			OG0001176	1		Hsap_XP_011532410.1
HyS0010.169	Hsap_XP_011520297.1	601623	OG0002268	1	FALSE	Hsap_XP_011543206.1
HyS0010.174	Hsap_XP_011524191.1	606097	OG0003762	1	TRUE	Hsap_XP_011524191.1
HyS0010.176	Hsap_XP_011520940.2	191092	OG0002395	1	TRUE	Hsap_XP_011520940.2
HyS0010.177	Hsap_XP_005252500.1	131320	OG0000535	6	TRUE	Hsap_NP_001139133.1	Hsap_NP_001295022.1	Hsap_NP_005248.2	Hsap_NP_536721.1	Hsap_XP_005252500.1	Hsap_XP_011542199.1
HyS0010.18	Hsap_XP_005263233.1	607545	OG0000844	1	TRUE	Hsap_XP_005263233.1
HyS0010.181			OG0000018	3		Hsap_NP_001295051.1	Hsap_NP_003050.2	Hsap_XP_006718493.1
HyS0010.182	Hsap_NP_000544.2	604611	OG0003772	1	TRUE	Hsap_NP_000544.2
HyS0010.184	Hsap_NP_003311.2	601197	OG0002765	2	TRUE	Hsap_NP_003311.2	Hsap_NP_003313.3
HyS0010.19			OG0000020	10		Hsap_NP_001317366.1	Hsap_NP_002818.1	Hsap_NP_002826.3	Hsap_NP_002829.3	Hsap_NP_057051.3	Hsap_NP_109592.1	Hsap_XP_005271136.1	Hsap_XP_016873572.1	Hsap_XP_016874762.1	Hsap_XP_024304527.1
HyS0010.190			OG0000929	1		Hsap_NP_001171113.1
HyS0010.192			OG0000011	11		Hsap_NP_001157814.1	Hsap_NP_001316524.1	Hsap_NP_001336347.1	Hsap_NP_005997.2	Hsap_NP_006054.2	Hsap_NP_055612.2	Hsap_NP_059111.2	Hsap_NP_071324.1	Hsap_NP_085127.2	Hsap_NP_689606.2	Hsap_XP_006715816.1
HyS0010.193			OG0000155	3		Hsap_NP_000546.2	Hsap_XP_011528141.1	Hsap_XP_016869210.1
HyS0010.195	Hsap_NP_115759.2	606118	OG0005489	1	TRUE	Hsap_NP_115759.2
HyS0010.197	Hsap_NP_112597.3	616283	OG0003717	1	TRUE	Hsap_NP_112597.3
HyS0010.202			OG0000069	3		Hsap_NP_005870.2	Hsap_NP_899196.1	Hsap_NP_899237.1
HyS0010.204	Hsap_NP_001337165.1	610534	OG0004652	1	TRUE	Hsap_NP_001337165.1
HyS0010.209			OG0000014	18		Hsap_NP_000450.2	Hsap_NP_001341913.1	Hsap_NP_002244.1	Hsap_NP_002520.2	Hsap_NP_004110.2	Hsap_NP_004551.2	Hsap_NP_005003.2	Hsap_NP_006171.2	Hsap_NP_006334.2	Hsap_NP_066124.1	Hsap_XP_005252051.1	Hsap_XP_005265227.2	Hsap_XP_006713931.1	Hsap_XP_006717771.1	Hsap_XP_011507889.1	Hsap_XP_011514525.1	Hsap_XP_011532780.1	Hsap_XP_011542745.1
HyS0010.210			OG0000014	18		Hsap_NP_000450.2	Hsap_NP_001341913.1	Hsap_NP_002244.1	Hsap_NP_002520.2	Hsap_NP_004110.2	Hsap_NP_004551.2	Hsap_NP_005003.2	Hsap_NP_006171.2	Hsap_NP_006334.2	Hsap_NP_066124.1	Hsap_XP_005252051.1	Hsap_XP_005265227.2	Hsap_XP_006713931.1	Hsap_XP_006717771.1	Hsap_XP_011507889.1	Hsap_XP_011514525.1	Hsap_XP_011532780.1	Hsap_XP_011542745.1
HyS0010.212	Hsap_NP_060552.4	614366	OG0000947	1	TRUE	Hsap_NP_060552.4
HyS0010.213	Hsap_XP_011531904.1	614789	OG0001173	1	TRUE	Hsap_XP_011531904.1
HyS0010.214			OG0000192	4		Hsap_NP_001191732.1	Hsap_NP_001300655.1	Hsap_NP_001333396.1	Hsap_NP_998764.1
HyS0010.215	Hsap_XP_011508856.1	600053	OG0000423	4	TRUE	Hsap_NP_001288.3	Hsap_NP_061971.3	Hsap_XP_005248106.2	Hsap_XP_011508856.1
HyS0010.216	Hsap_XP_005262352.1	313650	OG0001346	1	TRUE	Hsap_XP_005262352.1
HyS0010.218			OG0000879	1		Hsap_NP_644814.1
HyS0010.221			OG0000004	4		Hsap_NP_001072.2	Hsap_NP_006120.1	Hsap_NP_036596.3	Hsap_NP_113621.1
HyS0010.223	Hsap_NP_056190.1	612666	OG0004821	1	TRUE	Hsap_NP_056190.1
HyS0010.224			OG0000014	18		Hsap_NP_000450.2	Hsap_NP_001341913.1	Hsap_NP_002244.1	Hsap_NP_002520.2	Hsap_NP_004110.2	Hsap_NP_004551.2	Hsap_NP_005003.2	Hsap_NP_006171.2	Hsap_NP_006334.2	Hsap_NP_066124.1	Hsap_XP_005252051.1	Hsap_XP_005265227.2	Hsap_XP_006713931.1	Hsap_XP_006717771.1	Hsap_XP_011507889.1	Hsap_XP_011514525.1	Hsap_XP_011532780.1	Hsap_XP_011542745.1
HyS0010.226	Hsap_NP_001092757.1	609383	OG0002503	2	TRUE	Hsap_NP_001092757.1	Hsap_NP_653200.2
HyS0010.23			OG0000038	20		Hsap_NP_000316.2	Hsap_NP_000442.1	Hsap_NP_000545.1	Hsap_NP_001306003.1	Hsap_NP_002644.4	Hsap_NP_003856.1	Hsap_NP_003915.2	Hsap_NP_005020.1	Hsap_NP_005160.2	Hsap_NP_006252.3	Hsap_NP_006483.2	Hsap_NP_008913.2	Hsap_NP_038463.2	Hsap_NP_055403.2	Hsap_NP_068374.1	Hsap_NP_068745.2	Hsap_NP_073207.1	Hsap_NP_620689.1	Hsap_NP_776248.1	Hsap_NP_878314.1
HyS0010.231			OG0000307	3		Hsap_NP_005594.1	Hsap_NP_057613.4	Hsap_XP_016884928.1
HyS0010.234			OG0000162	1		Hsap_NP_000933.1
HyS0010.24			OG0000227	1		Hsap_NP_065094.3
HyS0010.242			OG0000045	10		Hsap_NP_000177.2	Hsap_NP_001006659.1	Hsap_NP_001287831.1	Hsap_NP_002104.2	Hsap_NP_055282.1	Hsap_NP_066303.2	Hsap_NP_758869.1	Hsap_XP_011507507.1	Hsap_XP_011507585.1	Hsap_XP_011508322.1
HyS0010.245	Hsap_NP_005899.3	609489	OG0002301	1	TRUE	Hsap_NP_005899.3
HyS0010.249	Hsap_XP_005264971.1	603123	OG0000726	2	TRUE	Hsap_NP_004937.1	Hsap_XP_005264971.1
HyS0010.25	Hsap_NP_008881.2	313440	OG0003016	2	TRUE	Hsap_NP_008881.2	Hsap_NP_598328.1
HyS0010.250			OG0000465	1		Hsap_NP_001008223.1
HyS0010.251	Hsap_NP_009111.2	275360	OG0002944	1	TRUE	Hsap_NP_009111.2
HyS0010.252	Hsap_XP_006719826.1	606019	OG0004878
HyS0010.253	Hsap_NP_000067.1	600856	OG0002151	2	TRUE	Hsap_NP_000067.1	Hsap_NP_004055.1
HyS0010.256	Hsap_NP_443086.1	616215	OG0001022	1	TRUE	Hsap_NP_443086.1
HyS0010.261			OG0000825	2		Hsap_NP_443106.1	Hsap_XP_011534515.1
HyS0010.271			OG0000025	3		Hsap_NP_001030.2	Hsap_NP_001153048.1	Hsap_XP_016879014.1
HyS0010.273			OG0000024	2		Hsap_NP_001138724.1	Hsap_NP_114141.2
HyS0010.274			OG0001388	2		Hsap_NP_004935.1	Hsap_XP_016878482.1
HyS0010.28	Hsap_NP_060480.1	606621	OG0005085	1	TRUE	Hsap_NP_060480.1
HyS0010.29			OG0000029	4		Hsap_NP_000171.1	Hsap_NP_001124154.1	Hsap_NP_004954.2	Hsap_XP_024303324.1
HyS0010.303			OG0001427	1		Hsap_NP_001287939.1
HyS0010.307			OG0000089	3		Hsap_NP_001978.1	Hsap_NP_002008.2	Hsap_NP_006485.2
HyS0010.31			OG0000244	2		Hsap_NP_001267.2	Hsap_NP_003456.1
HyS0010.313			OG0000288	2		Hsap_NP_001343945.1	Hsap_NP_149059.1
HyS0010.314			OG0000004	4		Hsap_NP_001072.2	Hsap_NP_006120.1	Hsap_NP_036596.3	Hsap_NP_113621.1
HyS0010.318	Hsap_XP_006719924.1	608896	OG0001345
HyS0010.32			OG0000140	1		Hsap_NP_004125.3
HyS0010.320			OG0000118	2		Hsap_NP_694578.1	Hsap_XP_011528676.1
HyS0010.321	Hsap_NP_620279.1	601240	OG0007090	1	TRUE	Hsap_NP_620279.1
HyS0010.322	Hsap_NP_005537.3	186973	OG0000044	10	TRUE	Hsap_NP_001274273.1	Hsap_NP_004295.2	Hsap_NP_005537.3	Hsap_NP_009297.2	Hsap_XP_011523331.1	Hsap_XP_011542127.1	Hsap_XP_016856524.1	Hsap_XP_016860356.1	Hsap_XP_016883514.1	Hsap_XP_024302815.1
HyS0010.323	Hsap_NP_000316.2	601542	OG0000038	20	TRUE	Hsap_NP_000316.2	Hsap_NP_000442.1	Hsap_NP_000545.1	Hsap_NP_001306003.1	Hsap_NP_002644.4	Hsap_NP_003856.1	Hsap_NP_003915.2	Hsap_NP_005020.1	Hsap_NP_005160.2	Hsap_NP_006252.3	Hsap_NP_006483.2	Hsap_NP_008913.2	Hsap_NP_038463.2	Hsap_NP_055403.2	Hsap_NP_068374.1	Hsap_NP_068745.2	Hsap_NP_073207.1	Hsap_NP_620689.1	Hsap_NP_776248.1	Hsap_NP_878314.1
HyS0010.324			OG0000134	4		Hsap_NP_001186326.1	Hsap_NP_001316166.1	Hsap_NP_002488.1	Hsap_XP_011522940.1
HyS0010.328	Hsap_XP_011519638.2	614661	OG0002127	1	TRUE	Hsap_XP_011519638.2
HyS0010.330			OG0000026	4		Hsap_NP_001073327.1	Hsap_XP_006715579.1	Hsap_XP_011521763.1	Hsap_XP_011526250.1
HyS0010.333			OG0000018	3		Hsap_NP_001295051.1	Hsap_NP_003050.2	Hsap_XP_006718493.1
HyS0010.334			OG0000018	3		Hsap_NP_001295051.1	Hsap_NP_003050.2	Hsap_XP_006718493.1
HyS0010.335			OG0000018	3		Hsap_NP_001295051.1	Hsap_NP_003050.2	Hsap_XP_006718493.1
HyS0010.336			OG0000018	3		Hsap_NP_001295051.1	Hsap_NP_003050.2	Hsap_XP_006718493.1
HyS0010.337			OG0000018	3		Hsap_NP_001295051.1	Hsap_NP_003050.2	Hsap_XP_006718493.1
HyS0010.338			OG0000467	2		Hsap_NP_054772.1	Hsap_NP_060261.2
HyS0010.339	Hsap_NP_060261.2	610865	OG0000467	2	TRUE	Hsap_NP_054772.1	Hsap_NP_060261.2
HyS0010.340	Hsap_NP_001091109.1	111100	OG0000064	2	TRUE	Hsap_NP_001091109.1	Hsap_XP_005259583.1
HyS0010.343	Hsap_XP_016885171.1	300579	OG0003881	1	TRUE	Hsap_XP_016885171.1
HyS0010.344			OG0000033	3		Hsap_NP_000834.2	Hsap_NP_001171536.1	Hsap_XP_011534084.1
HyS0010.346			OG0000025	3		Hsap_NP_001030.2	Hsap_NP_001153048.1	Hsap_XP_016879014.1
HyS0010.355			OG0000322	2		Hsap_XP_006716091.1	Hsap_XP_016869431.1
HyS0010.356			OG0000860	1		Hsap_NP_004334.1
HyS0010.36	Hsap_XP_005273819.1	600528	OG0000201	5	TRUE	Hsap_NP_000089.1	Hsap_NP_001333475.1	Hsap_NP_065574.3	Hsap_XP_005273819.1	Hsap_XP_024307119.1
HyS0010.360			OG0002183	1		Hsap_NP_003115.1
HyS0010.368			OG0000123	5		Hsap_NP_000058.1	Hsap_NP_001209.1	Hsap_NP_001308766.1	Hsap_XP_005257696.1	Hsap_XP_011521611.1
HyS0010.369	Hsap_XP_024307330.1	610055	OG0001672	1	TRUE	Hsap_XP_024307330.1
HyS0010.370			OG0001672	1		Hsap_XP_024307330.1
HyS0010.371			OG0001672	1		Hsap_XP_024307330.1
HyS0010.377	Hsap_NP_109592.1	600579	OG0000020	10	TRUE	Hsap_NP_001317366.1	Hsap_NP_002818.1	Hsap_NP_002826.3	Hsap_NP_002829.3	Hsap_NP_057051.3	Hsap_NP_109592.1	Hsap_XP_005271136.1	Hsap_XP_016873572.1	Hsap_XP_016874762.1	Hsap_XP_024304527.1
HyS0010.387			OG0000371	9		Hsap_NP_001245391.1	Hsap_NP_002575.1	Hsap_NP_003457.1	Hsap_NP_003981.3	Hsap_NP_006183.2	Hsap_NP_006185.1	Hsap_NP_057953.1	Hsap_NP_852124.1	Hsap_XP_011514578.1
HyS0010.389			OG0000267	2		Hsap_NP_003467.1	Hsap_XP_011536757.1
HyS0010.390			OG0000267	2		Hsap_NP_003467.1	Hsap_XP_011536757.1
HyS0010.392	Hsap_XP_016885152.1	300395	OG0002184	1	TRUE	Hsap_XP_016885152.1
HyS0010.398			OG0000065	3		Hsap_NP_001264044.1	Hsap_XP_011522005.1	Hsap_XP_016861618.1
HyS0010.400	Hsap_XP_024305969.1	605431	OG0001724	1	TRUE	Hsap_XP_024305969.1
HyS0010.401	Hsap_NP_115964.2	608539	OG0000282	8	TRUE	Hsap_NP_000159.3	Hsap_NP_001035878.1	Hsap_NP_003403.2	Hsap_NP_003404.1	Hsap_NP_009060.2	Hsap_NP_115964.2	Hsap_XP_011509271.2	Hsap_XP_011536491.1
HyS0010.406			OG0000052	3		Hsap_XP_006711325.1	Hsap_XP_011537012.1	Hsap_XP_016855798.1
HyS0010.409	Hsap_NP_940799.1	601898	OG0000003	12	TRUE	Hsap_NP_000570.1	Hsap_NP_000625.1	Hsap_NP_001050.1	Hsap_NP_001116513.2	Hsap_NP_001155969.1	Hsap_NP_001164645.1	Hsap_NP_001166031.1	Hsap_NP_001334985.1	Hsap_NP_004826.5	Hsap_NP_115940.2	Hsap_NP_940799.1	Hsap_XP_011515565.1
HyS0010.413	Hsap_NP_057953.1	167414	OG0000371	9	TRUE	Hsap_NP_001245391.1	Hsap_NP_002575.1	Hsap_NP_003457.1	Hsap_NP_003981.3	Hsap_NP_006183.2	Hsap_NP_006185.1	Hsap_NP_057953.1	Hsap_NP_852124.1	Hsap_XP_011514578.1
HyS0010.415	Hsap_NP_000043.4	300011	OG0001362	2	TRUE	Hsap_NP_000043.4	Hsap_XP_005266487.1
HyS0010.416	Hsap_NP_073605.4	606077	OG0001029	1	TRUE	Hsap_NP_073605.4
HyS0010.42			OG0000026	4		Hsap_NP_001073327.1	Hsap_XP_006715579.1	Hsap_XP_011521763.1	Hsap_XP_011526250.1
HyS0010.420	Hsap_XP_011510207.1	617612	OG0006000	1	TRUE	Hsap_XP_011510207.1
HyS0010.422	Hsap_NP_000099.2	238331	OG0003253	1	TRUE	Hsap_NP_000099.2
HyS0010.423			OG0001314	1		Hsap_NP_002241.1
HyS0010.425	Hsap_NP_003085.1	128260	OG0005730	1	TRUE	Hsap_NP_003085.1
HyS0010.428	Hsap_NP_060829.2	611482	OG0001990	1	TRUE	Hsap_NP_060829.2
HyS0010.430			OG0000044	10		Hsap_NP_001274273.1	Hsap_NP_004295.2	Hsap_NP_005537.3	Hsap_NP_009297.2	Hsap_XP_011523331.1	Hsap_XP_011542127.1	Hsap_XP_016856524.1	Hsap_XP_016860356.1	Hsap_XP_016883514.1	Hsap_XP_024302815.1
HyS0010.431			OG0000019	10		Hsap_NP_000071.1	Hsap_NP_000733.2	Hsap_NP_000734.2	Hsap_NP_000735.1	Hsap_NP_000736.2	Hsap_NP_000738.2	Hsap_NP_000739.1	Hsap_NP_000742.1	Hsap_NP_005190.4	Hsap_XP_016858745.1
HyS0010.432	Hsap_NP_000734.2	118503	OG0000019	10	TRUE	Hsap_NP_000071.1	Hsap_NP_000733.2	Hsap_NP_000734.2	Hsap_NP_000735.1	Hsap_NP_000736.2	Hsap_NP_000738.2	Hsap_NP_000739.1	Hsap_NP_000742.1	Hsap_NP_005190.4	Hsap_XP_016858745.1
HyS0010.436	Hsap_NP_000530.1	180380	OG0000128	1	FALSE	Hsap_XP_011541141.1
HyS0010.440			OG0000398	1		Hsap_NP_001243371.1
HyS0010.447			OG0001739	1		Hsap_XP_011518292.2
HyS0010.45	Hsap_NP_001300655.1	610110	OG0000192	4	TRUE	Hsap_NP_001191732.1	Hsap_NP_001300655.1	Hsap_NP_001333396.1	Hsap_NP_998764.1
HyS0010.52			OG0000003	12		Hsap_NP_000570.1	Hsap_NP_000625.1	Hsap_NP_001050.1	Hsap_NP_001116513.2	Hsap_NP_001155969.1	Hsap_NP_001164645.1	Hsap_NP_001166031.1	Hsap_NP_001334985.1	Hsap_NP_004826.5	Hsap_NP_115940.2	Hsap_NP_940799.1	Hsap_XP_011515565.1
HyS0010.53			OG0000003	12		Hsap_NP_000570.1	Hsap_NP_000625.1	Hsap_NP_001050.1	Hsap_NP_001116513.2	Hsap_NP_001155969.1	Hsap_NP_001164645.1	Hsap_NP_001166031.1	Hsap_NP_001334985.1	Hsap_NP_004826.5	Hsap_NP_115940.2	Hsap_NP_940799.1	Hsap_XP_011515565.1
HyS0010.56			OG0001110	1		Hsap_NP_004628.4
HyS0010.58	Hsap_NP_057153.8	614336	OG0005607	1	TRUE	Hsap_NP_057153.8
HyS0010.59	Hsap_NP_006507.2	138140	OG0000091	4	TRUE	Hsap_NP_000331.1	Hsap_NP_006507.2	Hsap_XP_011512158.1	Hsap_XP_011527362.1
HyS0010.6			OG0002112	1		Hsap_NP_001186220.1
HyS0010.60			OG0000052	3		Hsap_XP_006711325.1	Hsap_XP_011537012.1	Hsap_XP_016855798.1
HyS0010.63			OG0000766	1		Hsap_NP_001544.1
HyS0010.66			OG0000020	10		Hsap_NP_001317366.1	Hsap_NP_002818.1	Hsap_NP_002826.3	Hsap_NP_002829.3	Hsap_NP_057051.3	Hsap_NP_109592.1	Hsap_XP_005271136.1	Hsap_XP_016873572.1	Hsap_XP_016874762.1	Hsap_XP_024304527.1
HyS0010.68			OG0000020	10		Hsap_NP_001317366.1	Hsap_NP_002818.1	Hsap_NP_002826.3	Hsap_NP_002829.3	Hsap_NP_057051.3	Hsap_NP_109592.1	Hsap_XP_005271136.1	Hsap_XP_016873572.1	Hsap_XP_016874762.1	Hsap_XP_024304527.1
HyS0010.69	Hsap_XP_011527362.1	606145	OG0000091	4	TRUE	Hsap_NP_000331.1	Hsap_NP_006507.2	Hsap_XP_011512158.1	Hsap_XP_011527362.1
HyS0010.7	Hsap_NP_001278651.1	606323	OG0001626	1	TRUE	Hsap_NP_001278651.1
HyS0010.72			OG0000102	2		Hsap_NP_078918.3	Hsap_XP_005246506.1
HyS0010.73	Hsap_NP_001269938.1	608833	OG0000574	3	TRUE	Hsap_NP_001269938.1	Hsap_XP_011523635.1	Hsap_XP_016874407.1
HyS0010.76	Hsap_XP_011508625.1	613084	OG0006384
HyS0010.77			OG0000478	2		Hsap_NP_036462.2	Hsap_XP_011542958.1
HyS0010.78			OG0000747	1		Hsap_XP_011529288.3
HyS0010.79	Hsap_XP_016864080.1	194648	OG0009504
HyS0010.82	Hsap_XP_016868691.1	601653	OG0002727	2	TRUE	Hsap_XP_016865857.1	Hsap_XP_016868691.1
HyS0010.87	Hsap_NP_001367.2	600112	OG0001078	1	TRUE	Hsap_NP_001367.2
HyS0010.88	Hsap_NP_055647.2	612465	OG0003351	1	TRUE	Hsap_NP_055647.2
HyS0010.94	Hsap_NP_004076.1	300356	OG0001587	1	TRUE	Hsap_NP_004076.1
HyS0010.96	Hsap_NP_055886.1	605370	OG0002182	2	TRUE	Hsap_NP_002538.1	Hsap_NP_055886.1
HyS0010.97			OG0000288	2		Hsap_NP_001343945.1	Hsap_NP_149059.1
HyS0010.99	Hsap_NP_001273633.1	610553	OG0006316	1	TRUE	Hsap_NP_001273633.1
HyS0011.1			OG0001707	1		Hsap_XP_011528306.1
HyS0011.101			OG0002161	1		Hsap_NP_071505.2
HyS0011.106			OG0001318	1		Hsap_XP_005261262.1
HyS0011.116			OG0000003	12		Hsap_NP_000570.1	Hsap_NP_000625.1	Hsap_NP_001050.1	Hsap_NP_001116513.2	Hsap_NP_001155969.1	Hsap_NP_001164645.1	Hsap_NP_001166031.1	Hsap_NP_001334985.1	Hsap_NP_004826.5	Hsap_NP_115940.2	Hsap_NP_940799.1	Hsap_XP_011515565.1
HyS0011.118			OG0000004	4		Hsap_NP_001072.2	Hsap_NP_006120.1	Hsap_NP_036596.3	Hsap_NP_113621.1
HyS0011.12	Hsap_NP_858061.2	604325	OG0001976	1	TRUE	Hsap_NP_858061.2
HyS0011.123			OG0000171	7		Hsap_NP_001094.1	Hsap_NP_001245300.2	Hsap_NP_056145.4	Hsap_XP_005251033.1	Hsap_XP_011531017.1	Hsap_XP_016877209.1	Hsap_XP_016882820.1
HyS0011.125			OG0000169	1		Hsap_NP_055105.2
HyS0011.127			OG0000349	1		Hsap_XP_005248319.2
HyS0011.129	Hsap_NP_001287940.1	610162	OG0005613	1	TRUE	Hsap_NP_001287940.1
HyS0011.13	Hsap_NP_001258732.1	609347	OG0000646	3	TRUE	Hsap_NP_001258732.1	Hsap_NP_001316485.1	Hsap_XP_005264559.1
HyS0011.130	Hsap_NP_898871.1	248611	OG0004758	1	TRUE	Hsap_NP_898871.1
HyS0011.137	Hsap_XP_024305104.1	611549	OG0002516	1	TRUE	Hsap_XP_024305104.1
HyS0011.138	Hsap_NP_003095.2	182500	OG0000392	1	TRUE	Hsap_NP_003095.2
HyS0011.139			OG0000392	1		Hsap_NP_003095.2
HyS0011.140			OG0000100	3		Hsap_NP_057110.3	Hsap_NP_689656.2	Hsap_XP_011521403.1
HyS0011.141			OG0004758	1		Hsap_NP_898871.1
HyS0011.145			OG0000247	4		Hsap_NP_000228.1	Hsap_NP_000927.1	Hsap_NP_640341.1	Hsap_XP_005254431.2
HyS0011.148	Hsap_NP_003610.2	606709	OG0000034	4	TRUE	Hsap_NP_002308.2	Hsap_NP_003610.2	Hsap_NP_005567.2	Hsap_XP_024302928.1
HyS0011.15			OG0000063	7		Hsap_NP_001177740.1	Hsap_NP_002130.2	Hsap_NP_004072.3	Hsap_NP_112533.1	Hsap_NP_112740.1	Hsap_XP_005268883.1	Hsap_XP_016856357.1
HyS0011.150	Hsap_XP_024303862.1	138250	OG0002908	1	TRUE	Hsap_XP_024303862.1
HyS0011.153			OG0000293	3		Hsap_NP_006604.1	Hsap_NP_036252.1	Hsap_XP_011543800.1
HyS0011.155	Hsap_NP_899196.1	300379	OG0000069	3	TRUE	Hsap_NP_005870.2	Hsap_NP_899196.1	Hsap_NP_899237.1
HyS0011.156			OG0000070	4		Hsap_NP_001804.2	Hsap_NP_004514.2	Hsap_NP_036442.3	Hsap_XP_011519833.1
HyS0011.157	Hsap_XP_005264641.1	603009	OG0000344	2	TRUE	Hsap_NP_001274418.1	Hsap_XP_005264641.1
HyS0011.160	Hsap_NP_057182.1	614738	OG0006915	1	TRUE	Hsap_NP_057182.1
HyS0011.161			OG0000208	1		Hsap_XP_011523684.1
HyS0011.166	Hsap_XP_016874874.1	615847	OG0007326	1	TRUE	Hsap_XP_016874874.1
HyS0011.168			OG0001808	1		Hsap_NP_001186552.1
HyS0011.169	Hsap_NP_001008223.1	300646	OG0000465	1	TRUE	Hsap_NP_001008223.1
HyS0011.17	Hsap_NP_001302459.1	603704	OG0004038	1	TRUE	Hsap_NP_001302459.1
HyS0011.170			OG0000007	12		Hsap_NP_000015.1	Hsap_NP_000016.1	Hsap_NP_000515.2	Hsap_NP_000612.1	Hsap_NP_000673.2	Hsap_NP_000674.2	Hsap_NP_000675.1	Hsap_NP_000788.2	Hsap_NP_000789.1	Hsap_NP_001277738.1	Hsap_NP_473362.1	Hsap_XP_016855642.1
HyS0011.177			OG0000221	1		Hsap_NP_000430.3
HyS0011.178	Hsap_XP_016866721.1	107580	OG0008167
HyS0011.179			OG0000476	1		Hsap_NP_009075.1
HyS0011.183			OG0000328	5		Hsap_NP_000431.2	Hsap_NP_006195.3	Hsap_NP_058649.3	Hsap_XP_011511775.1	Hsap_XP_011533689.2
HyS0011.187	Hsap_NP_733746.1	610079	OG0002467	1	TRUE	Hsap_NP_733746.1
HyS0011.188	Hsap_NP_659428.2	612920	OG0002513	1	TRUE	Hsap_NP_659428.2
HyS0011.189			OG0002513	1		Hsap_NP_659428.2
HyS0011.19			OG0000008	20		Hsap_NP_000200.1	Hsap_NP_001073136.1	Hsap_NP_001106175.1	Hsap_NP_001129743.2	Hsap_NP_001180.1	Hsap_NP_002135.2	Hsap_NP_002139.2	Hsap_NP_002439.2	Hsap_NP_002440.2	Hsap_NP_004089.1	Hsap_NP_004378.1	Hsap_NP_004518.1	Hsap_NP_005211.1	Hsap_NP_005212.1	Hsap_NP_005506.3	Hsap_NP_005513.1	Hsap_NP_006726.1	Hsap_NP_061815.2	Hsap_NP_612138.1	Hsap_XP_016872278.1
HyS0011.193	Hsap_NP_001298184.1	604310	OG0006358	1	TRUE	Hsap_NP_001298184.1
HyS0011.195	Hsap_XP_006710537.1	609132	OG0000256	1	TRUE	Hsap_XP_006710537.1
HyS0011.197			OG0001568	1		Hsap_NP_071334.1
HyS0011.199	Hsap_NP_001298240.1	608547	OG0004622	1	TRUE	Hsap_NP_001298240.1
HyS0011.20	Hsap_XP_005273670.1	158378	OG0001671	1	TRUE	Hsap_XP_005273670.1
HyS0011.204	Hsap_NP_067077.1	615494	OG0006279	1	TRUE	Hsap_NP_067077.1
HyS0011.209			OG0000006	22		Hsap_NP_000124.1	Hsap_NP_000292.1	Hsap_NP_000495.1	Hsap_NP_000497.1	Hsap_NP_001088.2	Hsap_NP_001182058.1	Hsap_NP_001275929.1	Hsap_NP_001290343.1	Hsap_NP_002248.1	Hsap_NP_004123.1	Hsap_NP_004908.4	Hsap_NP_006578.2	Hsap_NP_068813.1	Hsap_NP_076927.1	Hsap_XP_005262878.1	Hsap_XP_011514713.1	Hsap_XP_011527957.1	Hsap_XP_011530232.1	Hsap_XP_011535776.2	Hsap_XP_011538168.1	Hsap_XP_011538852.1	Hsap_XP_024308770.1
HyS0011.210			OG0000221	1		Hsap_NP_000430.3
HyS0011.218			OG0000033	3		Hsap_NP_000834.2	Hsap_NP_001171536.1	Hsap_XP_011534084.1
HyS0011.22			OG0001203	1		Hsap_NP_004784.2
HyS0011.228			OG0000017	11		Hsap_NP_000093.1	Hsap_NP_000095.2	Hsap_NP_000097.3	Hsap_NP_000491.4	Hsap_NP_000753.3	Hsap_NP_000758.1	Hsap_NP_000760.1	Hsap_NP_000761.3	Hsap_NP_000762.2	Hsap_NP_078790.2	Hsap_XP_005262774.1
HyS0011.23			OG0000800	3		Hsap_NP_001182192.1	Hsap_XP_011516787.1	Hsap_XP_016872564.1
HyS0011.234			OG0000041	6		Hsap_NP_000046.1	Hsap_NP_001020366.1	Hsap_NP_001798.2	Hsap_NP_851820.1	Hsap_XP_011514527.1	Hsap_XP_011543850.1
HyS0011.237			OG0000033	3		Hsap_NP_000834.2	Hsap_NP_001171536.1	Hsap_XP_011534084.1
HyS0011.238	Hsap_NP_001171536.1	601199	OG0000033	3	TRUE	Hsap_NP_000834.2	Hsap_NP_001171536.1	Hsap_XP_011534084.1
HyS0011.24			OG0000008	20		Hsap_NP_000200.1	Hsap_NP_001073136.1	Hsap_NP_001106175.1	Hsap_NP_001129743.2	Hsap_NP_001180.1	Hsap_NP_002135.2	Hsap_NP_002139.2	Hsap_NP_002439.2	Hsap_NP_002440.2	Hsap_NP_004089.1	Hsap_NP_004378.1	Hsap_NP_004518.1	Hsap_NP_005211.1	Hsap_NP_005212.1	Hsap_NP_005506.3	Hsap_NP_005513.1	Hsap_NP_006726.1	Hsap_NP_061815.2	Hsap_NP_612138.1	Hsap_XP_016872278.1
HyS0011.247			OG0001370	1		Hsap_NP_056980.2
HyS0011.25			OG0001671	1		Hsap_XP_005273670.1
HyS0011.250	Hsap_NP_003840.2	611224	OG0003175	1	TRUE	Hsap_NP_003840.2
HyS0011.252			OG0000008	20		Hsap_NP_000200.1	Hsap_NP_001073136.1	Hsap_NP_001106175.1	Hsap_NP_001129743.2	Hsap_NP_001180.1	Hsap_NP_002135.2	Hsap_NP_002139.2	Hsap_NP_002439.2	Hsap_NP_002440.2	Hsap_NP_004089.1	Hsap_NP_004378.1	Hsap_NP_004518.1	Hsap_NP_005211.1	Hsap_NP_005212.1	Hsap_NP_005506.3	Hsap_NP_005513.1	Hsap_NP_006726.1	Hsap_NP_061815.2	Hsap_NP_612138.1	Hsap_XP_016872278.1
HyS0011.254			OG0000467	2		Hsap_NP_054772.1	Hsap_NP_060261.2
HyS0011.255			OG0001315	2		Hsap_NP_001269210.1	Hsap_NP_037460.2
HyS0011.259	Hsap_NP_663304.1	602614	OG0000394	2	TRUE	Hsap_NP_057737.2	Hsap_NP_663304.1
HyS0011.26	Hsap_NP_004784.2	605490	OG0001203	1	TRUE	Hsap_NP_004784.2
HyS0011.261	Hsap_XP_005261252.2	179020	OG0004010	1	TRUE	Hsap_XP_005261252.2
HyS0011.262	Hsap_NP_000178.2	607474	OG0004838	1	TRUE	Hsap_NP_000178.2
HyS0011.263			OG0000782	1		Hsap_NP_000388.2
HyS0011.266			OG0000130	1		Hsap_XP_011515926.1
HyS0011.267	Hsap_NP_000090.1	604312	OG0007932
HyS0011.269	Hsap_XP_011515926.1	604775	OG0000130	1	TRUE	Hsap_XP_011515926.1
HyS0011.27			OG0000800	3		Hsap_NP_001182192.1	Hsap_XP_011516787.1	Hsap_XP_016872564.1
HyS0011.270			OG0000700	1		Hsap_XP_011519659.1
HyS0011.271	Hsap_NP_005841.1	605593	OG0001285	1	TRUE	Hsap_NP_005841.1
HyS0011.276	Hsap_XP_006724531.1	300377	OG0000884	1	TRUE	Hsap_XP_006724531.1
HyS0011.278			OG0000388	2		Hsap_NP_001138354.1	Hsap_XP_006724806.1
HyS0011.279	Hsap_NP_055742.2	300724	OG0002360	1	TRUE	Hsap_NP_055742.2
HyS0011.280	Hsap_XP_011543857.1	300075	OG0000547	1	TRUE	Hsap_XP_011543857.1
HyS0011.281			OG0001395	1		Hsap_NP_004888.2
HyS0011.294	Hsap_NP_056240.2	616404	OG0002969	1	TRUE	Hsap_NP_056240.2
HyS0011.3	Hsap_NP_001121901.1	612761	OG0003518	1	TRUE	Hsap_NP_001121901.1
HyS0011.30	Hsap_NP_004514.2	148760	OG0000070	4	TRUE	Hsap_NP_001804.2	Hsap_NP_004514.2	Hsap_NP_036442.3	Hsap_XP_011519833.1
HyS0011.300			OG0000055	5		Hsap_NP_001264055.1	Hsap_NP_004886.3	Hsap_NP_071445.1	Hsap_XP_006720943.2	Hsap_XP_011524898.1
HyS0011.302	Hsap_NP_001035897.1	607042	OG0000692	1	TRUE	Hsap_NP_001035897.1
HyS0011.306			OG0000070	4		Hsap_NP_001804.2	Hsap_NP_004514.2	Hsap_NP_036442.3	Hsap_XP_011519833.1
HyS0011.308			OG0001987	1		Hsap_XP_016866087.1
HyS0011.309			OG0000007	12		Hsap_NP_000015.1	Hsap_NP_000016.1	Hsap_NP_000515.2	Hsap_NP_000612.1	Hsap_NP_000673.2	Hsap_NP_000674.2	Hsap_NP_000675.1	Hsap_NP_000788.2	Hsap_NP_000789.1	Hsap_NP_001277738.1	Hsap_NP_473362.1	Hsap_XP_016855642.1
HyS0011.312	Hsap_NP_009186.1	604327	OG0000263	2	TRUE	Hsap_NP_001488.2	Hsap_NP_009186.1
HyS0011.313	Hsap_NP_061815.2	142992	OG0000008	20	TRUE	Hsap_NP_000200.1	Hsap_NP_001073136.1	Hsap_NP_001106175.1	Hsap_NP_001129743.2	Hsap_NP_001180.1	Hsap_NP_002135.2	Hsap_NP_002139.2	Hsap_NP_002439.2	Hsap_NP_002440.2	Hsap_NP_004089.1	Hsap_NP_004378.1	Hsap_NP_004518.1	Hsap_NP_005211.1	Hsap_NP_005212.1	Hsap_NP_005506.3	Hsap_NP_005513.1	Hsap_NP_006726.1	Hsap_NP_061815.2	Hsap_NP_612138.1	Hsap_XP_016872278.1
HyS0011.316	Hsap_NP_055054.1	606454	OG0004483	1	TRUE	Hsap_NP_055054.1
HyS0011.317	Hsap_XP_005274379.1	603025	OG0001880	1	TRUE	Hsap_XP_005274379.1
HyS0011.318	Hsap_NP_057126.2	606489	OG0003845	1	TRUE	Hsap_NP_057126.2
HyS0011.319	Hsap_NP_000224.2	152790	OG0000121	3	TRUE	Hsap_NP_000224.2	Hsap_XP_005268094.1	Hsap_XP_011531035.1
HyS0011.32			OG0000668	1		Hsap_NP_001317692.1
HyS0011.326			OG0000455	2		Hsap_NP_009223.2	Hsap_XP_005265562.1
HyS0011.331			OG0000293	3		Hsap_NP_006604.1	Hsap_NP_036252.1	Hsap_XP_011543800.1
HyS0011.340			OG0000265	3		Hsap_NP_006006.3	Hsap_NP_689854.2	Hsap_XP_011534286.2
HyS0011.40	Hsap_XP_016863766.1	613009	OG0004966	1	TRUE	Hsap_XP_016863766.1
HyS0011.43			OG0000169	1		Hsap_NP_055105.2
HyS0011.49	Hsap_NP_004290.2	300135	OG0000956	2	TRUE	Hsap_NP_004290.2	Hsap_NP_005680.1
HyS0011.51	Hsap_XP_006720438.1	602293	OG0001529	2	TRUE	Hsap_XP_005254183.1	Hsap_XP_006720438.1
HyS0011.55	Hsap_NP_071505.2	603518	OG0002161	1	TRUE	Hsap_NP_071505.2
HyS0011.59	Hsap_XP_011514965.1	604149	OG0007226	2	TRUE	Hsap_XP_011514965.1	Hsap_XP_011523422.2
HyS0011.61			OG0001066	1		Hsap_NP_054733.2
HyS0011.63	Hsap_NP_003671.1	603623	OG0001023	2	TRUE	Hsap_NP_001135888.1	Hsap_NP_003671.1
HyS0011.64			OG0006825	1		Hsap_XP_006715541.1
HyS0011.66			OG0001023	2		Hsap_NP_001135888.1	Hsap_NP_003671.1
HyS0011.67	Hsap_XP_006715541.1	612025	OG0006825	1	TRUE	Hsap_XP_006715541.1
HyS0011.7			OG0001244	1		Hsap_XP_024304530.1
HyS0011.77			OG0005367	1		Hsap_NP_620305.2
HyS0011.79	Hsap_NP_510870.1	603646	OG0003948	1	TRUE	Hsap_NP_510870.1
HyS0011.8	Hsap_NP_001305466.1	602466	OG0002100	2	TRUE	Hsap_NP_001305466.1	Hsap_XP_011535987.1
HyS0011.86			OG0000933	2		Hsap_NP_001419.1	Hsap_XP_005256578.1
HyS0011.93			OG0000188	5		Hsap_NP_001158087.1	Hsap_NP_001454.2	Hsap_NP_001457.1	Hsap_NP_003005.2	Hsap_NP_036325.2
HyS0011.97	Hsap_NP_008878.3	602122	OG0003448	1	TRUE	Hsap_NP_008878.3
HyS0011.98			OG0001425	1		Hsap_NP_776173.3
HyS0011.99			OG0000158	2		Hsap_NP_000387.1	Hsap_NP_003784.2
HyS0012.100	Hsap_NP_065979.1	615951	OG0004825	1	TRUE	Hsap_NP_065979.1
HyS0012.102			OG0001309	3		Hsap_NP_057065.2	Hsap_XP_011513849.1	Hsap_XP_016872205.1
HyS0012.104	Hsap_NP_005850.1	600473	OG0003599	1	TRUE	Hsap_NP_005850.1
HyS0012.107			OG0000033	3		Hsap_NP_000834.2	Hsap_NP_001171536.1	Hsap_XP_011534084.1
HyS0012.108			OG0000033	3		Hsap_NP_000834.2	Hsap_NP_001171536.1	Hsap_XP_011534084.1
HyS0012.110			OG0000180	4		Hsap_NP_001241678.1	Hsap_NP_003826.2	Hsap_XP_011520984.1	Hsap_XP_011523622.1
HyS0012.121			OG0000011	11		Hsap_NP_001157814.1	Hsap_NP_001316524.1	Hsap_NP_001336347.1	Hsap_NP_005997.2	Hsap_NP_006054.2	Hsap_NP_055612.2	Hsap_NP_059111.2	Hsap_NP_071324.1	Hsap_NP_085127.2	Hsap_NP_689606.2	Hsap_XP_006715816.1
HyS0012.126	Hsap_NP_059111.2	605775	OG0000011	11	TRUE	Hsap_NP_001157814.1	Hsap_NP_001316524.1	Hsap_NP_001336347.1	Hsap_NP_005997.2	Hsap_NP_006054.2	Hsap_NP_055612.2	Hsap_NP_059111.2	Hsap_NP_071324.1	Hsap_NP_085127.2	Hsap_NP_689606.2	Hsap_XP_006715816.1
HyS0012.127	Hsap_NP_001243143.1	182350	OG0000805	3	TRUE	Hsap_NP_000692.2	Hsap_NP_000693.1	Hsap_NP_001243143.1
HyS0012.129	Hsap_NP_000149.3	607839	OG0002426	1	TRUE	Hsap_NP_000149.3
HyS0012.130	Hsap_NP_001291646.2	601728	OG0000830	1	TRUE	Hsap_NP_001291646.2
HyS0012.131			OG0000113	1		Hsap_NP_005449.5
HyS0012.134	Hsap_XP_011537421.1	605084	OG0000953	1	TRUE	Hsap_XP_011537421.1
HyS0012.136	Hsap_NP_002171.2	600502	OG0002991	1	TRUE	Hsap_NP_002171.2
HyS0012.137			OG0000064	2		Hsap_NP_001091109.1	Hsap_XP_005259583.1
HyS0012.143			OG0000113	1		Hsap_NP_005449.5
HyS0012.145	Hsap_NP_060753.1	615792	OG0006757
HyS0012.15			OG0001196	1		Hsap_XP_016876419.1
HyS0012.152			OG0002991	1		Hsap_NP_002171.2
HyS0012.161			OG0000004	4		Hsap_NP_001072.2	Hsap_NP_006120.1	Hsap_NP_036596.3	Hsap_NP_113621.1
HyS0012.162			OG0000004	4		Hsap_NP_001072.2	Hsap_NP_006120.1	Hsap_NP_036596.3	Hsap_NP_113621.1
HyS0012.163			OG0000004	4		Hsap_NP_001072.2	Hsap_NP_006120.1	Hsap_NP_036596.3	Hsap_NP_113621.1
HyS0012.168	Hsap_NP_694972.3	608002	OG0005150	1	TRUE	Hsap_NP_694972.3
HyS0012.169	Hsap_XP_024309835.1	164011	OG0000418	6	TRUE	Hsap_NP_006500.2	Hsap_NP_065390.1	Hsap_NP_068810.3	Hsap_XP_011525500.2	Hsap_XP_016871767.1	Hsap_XP_024309835.1
HyS0012.172			OG0000080	11		Hsap_NP_000337.1	Hsap_NP_001291744.1	Hsap_NP_003097.1	Hsap_NP_003098.1	Hsap_NP_003099.1	Hsap_NP_003131.1	Hsap_NP_005625.2	Hsap_NP_008872.1	Hsap_NP_060889.1	Hsap_NP_071899.1	Hsap_XP_016875377.1
HyS0012.174			OG0000064	2		Hsap_NP_001091109.1	Hsap_XP_005259583.1
HyS0012.175	Hsap_NP_203524.1	190070	OG0031441
HyS0012.181			OG0000048	4		Hsap_NP_075044.2	Hsap_NP_612808.1	Hsap_XP_011529322.1	Hsap_XP_016866294.1
HyS0012.184			OG0000292	7		Hsap_NP_000060.2	Hsap_NP_000709.1	Hsap_NP_005174.2	Hsap_NP_075461.2	Hsap_XP_016857740.1	Hsap_XP_016862626.1	Hsap_XP_016875415.1
HyS0012.188			OG0000024	2		Hsap_NP_001138724.1	Hsap_NP_114141.2
HyS0012.197	Hsap_NP_054706.1	193065	OG0001335	1	TRUE	Hsap_NP_054706.1
HyS0012.200			OG0000003	12		Hsap_NP_000570.1	Hsap_NP_000625.1	Hsap_NP_001050.1	Hsap_NP_001116513.2	Hsap_NP_001155969.1	Hsap_NP_001164645.1	Hsap_NP_001166031.1	Hsap_NP_001334985.1	Hsap_NP_004826.5	Hsap_NP_115940.2	Hsap_NP_940799.1	Hsap_XP_011515565.1
HyS0012.209			OG0000265	3		Hsap_NP_006006.3	Hsap_NP_689854.2	Hsap_XP_011534286.2
HyS0012.223	Hsap_NP_570850.2	605290	OG0002798	1	TRUE	Hsap_NP_570850.2
HyS0012.224	Hsap_XP_006715579.1	612243	OG0000026	4	TRUE	Hsap_NP_001073327.1	Hsap_XP_006715579.1	Hsap_XP_011521763.1	Hsap_XP_011526250.1
HyS0012.226			OG0000008	20		Hsap_NP_000200.1	Hsap_NP_001073136.1	Hsap_NP_001106175.1	Hsap_NP_001129743.2	Hsap_NP_001180.1	Hsap_NP_002135.2	Hsap_NP_002139.2	Hsap_NP_002439.2	Hsap_NP_002440.2	Hsap_NP_004089.1	Hsap_NP_004378.1	Hsap_NP_004518.1	Hsap_NP_005211.1	Hsap_NP_005212.1	Hsap_NP_005506.3	Hsap_NP_005513.1	Hsap_NP_006726.1	Hsap_NP_061815.2	Hsap_NP_612138.1	Hsap_XP_016872278.1
HyS0012.228			OG0000024	2		Hsap_NP_001138724.1	Hsap_NP_114141.2
HyS0012.23			OG0000734	1		Hsap_NP_000164.5
HyS0012.233			OG0000104	3		Hsap_NP_058634.4	Hsap_XP_005264262.1	Hsap_XP_011534658.1
HyS0012.242			OG0000003	12		Hsap_NP_000570.1	Hsap_NP_000625.1	Hsap_NP_001050.1	Hsap_NP_001116513.2	Hsap_NP_001155969.1	Hsap_NP_001164645.1	Hsap_NP_001166031.1	Hsap_NP_001334985.1	Hsap_NP_004826.5	Hsap_NP_115940.2	Hsap_NP_940799.1	Hsap_XP_011515565.1
HyS0012.243	Hsap_XP_011527351.1	611203	OG0000114	5	TRUE	Hsap_NP_006727.2	Hsap_NP_068572.1	Hsap_XP_005249572.1	Hsap_XP_011527351.1	Hsap_XP_011543306.1
HyS0012.244	Hsap_NP_085915.2	154045	OG0013857
HyS0012.245	Hsap_NP_114141.2	608548	OG0000024	2	TRUE	Hsap_NP_001138724.1	Hsap_NP_114141.2
HyS0012.247			OG0000004	4		Hsap_NP_001072.2	Hsap_NP_006120.1	Hsap_NP_036596.3	Hsap_NP_113621.1
HyS0012.249			OG0000027	7		Hsap_NP_000249.1	Hsap_NP_001292553.1	Hsap_NP_001305425.1	Hsap_NP_524144.1	Hsap_XP_006720321.1	Hsap_XP_011543483.1	Hsap_XP_016880172.1
HyS0012.25	Hsap_NP_060222.2	301027	OG0002282	1	TRUE	Hsap_NP_060222.2
HyS0012.250			OG0000016	7		Hsap_NP_001136235.1	Hsap_NP_001171809.1	Hsap_NP_001278232.1	Hsap_NP_003728.1	Hsap_NP_071407.4	Hsap_XP_011535902.1	Hsap_XP_011538639.1
HyS0012.257	Hsap_XP_011511291.1	600521	OG0005487	4	TRUE	Hsap_NP_001341275.1	Hsap_NP_006601.2	Hsap_NP_958850.1	Hsap_XP_011511291.1
HyS0012.262			OG0000016	7		Hsap_NP_001136235.1	Hsap_NP_001171809.1	Hsap_NP_001278232.1	Hsap_NP_003728.1	Hsap_NP_071407.4	Hsap_XP_011535902.1	Hsap_XP_011538639.1
HyS0012.265			OG0000004	4		Hsap_NP_001072.2	Hsap_NP_006120.1	Hsap_NP_036596.3	Hsap_NP_113621.1
HyS0012.270	Hsap_XP_016875665.1	608075	OG0000229	6	TRUE	Hsap_NP_001124436.1	Hsap_NP_056007.1	Hsap_XP_006723632.1	Hsap_XP_011538151.1	Hsap_XP_016875665.1	Hsap_XP_024305716.1
HyS0012.275			OG0000049	4		Hsap_NP_000085.1	Hsap_NP_002372.1	Hsap_NP_004360.2	Hsap_XP_016876560.1
HyS0012.276			OG0000193	3		Hsap_NP_001305990.1	Hsap_NP_002089.4	Hsap_XP_005270849.1
HyS0012.277			OG0000080	11		Hsap_NP_000337.1	Hsap_NP_001291744.1	Hsap_NP_003097.1	Hsap_NP_003098.1	Hsap_NP_003099.1	Hsap_NP_003131.1	Hsap_NP_005625.2	Hsap_NP_008872.1	Hsap_NP_060889.1	Hsap_NP_071899.1	Hsap_XP_016875377.1
HyS0012.278			OG0000929	1		Hsap_NP_001171113.1
HyS0012.28			OG0000115	3		Hsap_NP_001073594.1	Hsap_NP_036246.1	Hsap_NP_116759.2
HyS0012.286	Hsap_XP_016863659.1	147183	OG0002564	1	TRUE	Hsap_XP_016863659.1
HyS0012.288			OG0000409	2		Hsap_NP_001129172.1	Hsap_NP_036611.2
HyS0012.290			OG0000345	2		Hsap_NP_000535.3	Hsap_NP_000584.2
HyS0012.293			OG0000268	2		Hsap_NP_004454.2	Hsap_XP_005253361.1
HyS0012.296			OG0002990	1		Hsap_XP_005269064.1
HyS0012.297	Hsap_XP_005269064.1	608283	OG0002990	1	TRUE	Hsap_XP_005269064.1
HyS0012.298	Hsap_XP_024303324.1	108961	OG0000029	4	TRUE	Hsap_NP_000171.1	Hsap_NP_001124154.1	Hsap_NP_004954.2	Hsap_XP_024303324.1
HyS0012.30			OG0000099	9		Hsap_NP_002412.1	Hsap_NP_002413.1	Hsap_NP_002418.1	Hsap_NP_002420.1	Hsap_NP_004521.1	Hsap_NP_004762.2	Hsap_NP_004985.2	Hsap_NP_004986.1	Hsap_NP_671724.1
HyS0012.308			OG0000080	11		Hsap_NP_000337.1	Hsap_NP_001291744.1	Hsap_NP_003097.1	Hsap_NP_003098.1	Hsap_NP_003099.1	Hsap_NP_003131.1	Hsap_NP_005625.2	Hsap_NP_008872.1	Hsap_NP_060889.1	Hsap_NP_071899.1	Hsap_XP_016875377.1
HyS0012.311			OG0001568	1		Hsap_NP_071334.1
HyS0012.312			OG0000293	3		Hsap_NP_006604.1	Hsap_NP_036252.1	Hsap_XP_011543800.1
HyS0012.313			OG0000929	1		Hsap_NP_001171113.1
HyS0012.323			OG0000783	1		Hsap_NP_001949.1
HyS0012.325	Hsap_NP_060899.2	607012	OG0003032	1	TRUE	Hsap_NP_060899.2
HyS0012.33			OG0000113	1		Hsap_NP_005449.5
HyS0012.34			OG0000014	18		Hsap_NP_000450.2	Hsap_NP_001341913.1	Hsap_NP_002244.1	Hsap_NP_002520.2	Hsap_NP_004110.2	Hsap_NP_004551.2	Hsap_NP_005003.2	Hsap_NP_006171.2	Hsap_NP_006334.2	Hsap_NP_066124.1	Hsap_XP_005252051.1	Hsap_XP_005265227.2	Hsap_XP_006713931.1	Hsap_XP_006717771.1	Hsap_XP_011507889.1	Hsap_XP_011514525.1	Hsap_XP_011532780.1	Hsap_XP_011542745.1
HyS0012.35			OG0000037	9		Hsap_NP_000803.2	Hsap_NP_000815.1	Hsap_NP_001121117.1	Hsap_NP_001139512.1	Hsap_NP_068711.1	Hsap_NP_068712.1	Hsap_NP_944493.2	Hsap_XP_016856425.1	Hsap_XP_024309731.1
HyS0012.36			OG0000037	9		Hsap_NP_000803.2	Hsap_NP_000815.1	Hsap_NP_001121117.1	Hsap_NP_001139512.1	Hsap_NP_068711.1	Hsap_NP_068712.1	Hsap_NP_944493.2	Hsap_XP_016856425.1	Hsap_XP_024309731.1
HyS0012.40			OG0000099	9		Hsap_NP_002412.1	Hsap_NP_002413.1	Hsap_NP_002418.1	Hsap_NP_002420.1	Hsap_NP_004521.1	Hsap_NP_004762.2	Hsap_NP_004985.2	Hsap_NP_004986.1	Hsap_NP_671724.1
HyS0012.45			OG0000032	3		Hsap_NP_003042.3	Hsap_NP_006508.2	Hsap_XP_016871727.1
HyS0012.47	Hsap_XP_011536757.1	608364	OG0000267	2	TRUE	Hsap_NP_003467.1	Hsap_XP_011536757.1
HyS0012.48			OG0001196	1		Hsap_XP_016876419.1
HyS0012.49			OG0000099	9		Hsap_NP_002412.1	Hsap_NP_002413.1	Hsap_NP_002418.1	Hsap_NP_002420.1	Hsap_NP_004521.1	Hsap_NP_004762.2	Hsap_NP_004985.2	Hsap_NP_004986.1	Hsap_NP_671724.1
HyS0012.52			OG0001077	1		Hsap_NP_644808.1
HyS0012.53	Hsap_NP_005887.2	147700	OG0001455	2	TRUE	Hsap_NP_002159.2	Hsap_NP_005887.2
HyS0012.6	Hsap_NP_001240312.1	604174	OG0002874	1	TRUE	Hsap_NP_001240312.1
HyS0012.65			OG0001530	2		Hsap_NP_000594.2	Hsap_NP_000616.3
HyS0012.66			OG0001530	2		Hsap_NP_000594.2	Hsap_NP_000616.3
HyS0012.67			OG0001530	2		Hsap_NP_000594.2	Hsap_NP_000616.3
HyS0012.7	Hsap_XP_016859290.1	138292	OG0001835	1	TRUE	Hsap_XP_016859290.1
HyS0012.73			OG0000302	4		Hsap_NP_000477.1	Hsap_NP_001316801.1	Hsap_NP_001642.1	Hsap_NP_036196.1
HyS0012.74			OG0000302	4		Hsap_NP_000477.1	Hsap_NP_001316801.1	Hsap_NP_001642.1	Hsap_NP_036196.1
HyS0012.78	Hsap_XP_011540533.1	606351	OG0009312
HyS0012.8			OG0000064	2		Hsap_NP_001091109.1	Hsap_XP_005259583.1
HyS0012.83			OG0000068	1		Hsap_NP_001243339.1
HyS0012.86	Hsap_NP_072046.2	602769	OG0003093	2	TRUE	Hsap_NP_008823.1	Hsap_NP_072046.2
HyS0012.87			OG0000311	10		Hsap_NP_001020018.1	Hsap_NP_001070869.1	Hsap_NP_001195.2	Hsap_NP_001243722.1	Hsap_NP_001293139.1	Hsap_NP_001334595.1	Hsap_NP_064733.3	Hsap_XP_005265640.1	Hsap_XP_011536475.1	Hsap_XP_011538406.1
HyS0012.88	Hsap_XP_005256079.1	614151	OG0002891	1	TRUE	Hsap_XP_005256079.1
HyS0012.9	Hsap_NP_001027565.1	300610	OG0000520	3	TRUE	Hsap_NP_001027565.1	Hsap_NP_001185767.1	Hsap_NP_060167.2
HyS0012.90	Hsap_NP_775831.2	612659	OG0000580	1	TRUE	Hsap_NP_775831.2
HyS0012.91			OG0000055	5		Hsap_NP_001264055.1	Hsap_NP_004886.3	Hsap_NP_071445.1	Hsap_XP_006720943.2	Hsap_XP_011524898.1
HyS0012.93			OG0002942	1		Hsap_NP_055112.2
HyS0013.101	Hsap_NP_060277.1	610107	OG0001663	1	TRUE	Hsap_NP_060277.1
HyS0013.108	Hsap_NP_003174.3	603639	OG0000404	2	TRUE	Hsap_NP_001101.1	Hsap_NP_003174.3
HyS0013.109			OG0000404	2		Hsap_NP_001101.1	Hsap_NP_003174.3
HyS0013.111	Hsap_NP_006079.1	602660	OG0000271	9	TRUE	Hsap_NP_001060.1	Hsap_NP_001276052.1	Hsap_NP_001280141.1	Hsap_NP_001290453.1	Hsap_NP_006077.2	Hsap_NP_006079.1	Hsap_NP_110400.1	Hsap_NP_817124.1	Hsap_NP_821080.1
HyS0013.112	Hsap_XP_006723917.1	606421	OG0002285	1	TRUE	Hsap_XP_006723917.1
HyS0013.113			OG0003703	1		Hsap_NP_000542.1
HyS0013.115			OG0000006	22		Hsap_NP_000124.1	Hsap_NP_000292.1	Hsap_NP_000495.1	Hsap_NP_000497.1	Hsap_NP_001088.2	Hsap_NP_001182058.1	Hsap_NP_001275929.1	Hsap_NP_001290343.1	Hsap_NP_002248.1	Hsap_NP_004123.1	Hsap_NP_004908.4	Hsap_NP_006578.2	Hsap_NP_068813.1	Hsap_NP_076927.1	Hsap_XP_005262878.1	Hsap_XP_011514713.1	Hsap_XP_011527957.1	Hsap_XP_011530232.1	Hsap_XP_011535776.2	Hsap_XP_011538168.1	Hsap_XP_011538852.1	Hsap_XP_024308770.1
HyS0013.116			OG0000237	4		Hsap_NP_001238949.1	Hsap_NP_060106.2	Hsap_NP_060132.3	Hsap_XP_016877839.1
HyS0013.117			OG0000006	22		Hsap_NP_000124.1	Hsap_NP_000292.1	Hsap_NP_000495.1	Hsap_NP_000497.1	Hsap_NP_001088.2	Hsap_NP_001182058.1	Hsap_NP_001275929.1	Hsap_NP_001290343.1	Hsap_NP_002248.1	Hsap_NP_004123.1	Hsap_NP_004908.4	Hsap_NP_006578.2	Hsap_NP_068813.1	Hsap_NP_076927.1	Hsap_XP_005262878.1	Hsap_XP_011514713.1	Hsap_XP_011527957.1	Hsap_XP_011530232.1	Hsap_XP_011535776.2	Hsap_XP_011538168.1	Hsap_XP_011538852.1	Hsap_XP_024308770.1
HyS0013.127			OG0000009	3		Hsap_NP_150241.2	Hsap_XP_005251870.1	Hsap_XP_006714220.1
HyS0013.131	Hsap_NP_036211.2	604900	OG0003600	1	TRUE	Hsap_NP_036211.2
HyS0013.14	Hsap_NP_077282.3	611026	OG0006537	1	TRUE	Hsap_NP_077282.3
HyS0013.147	Hsap_NP_003656.2	604973	OG0000010	8	TRUE	Hsap_NP_000499.1	Hsap_NP_003656.2	Hsap_NP_005132.2	Hsap_NP_055310.1	Hsap_NP_061978.6	Hsap_NP_068656.2	Hsap_XP_005272541.1	Hsap_XP_016870167.1
HyS0013.150	Hsap_NP_000542.1	608537	OG0003703	1	TRUE	Hsap_NP_000542.1
HyS0013.151			OG0003703	1		Hsap_NP_000542.1
HyS0013.159			OG0006135	1		Hsap_NP_001181927.1
HyS0013.161	Hsap_NP_997717.2	613183	OG0001006	1	TRUE	Hsap_NP_997717.2
HyS0013.163	Hsap_XP_011526959.2	180960	OG0002983	1	TRUE	Hsap_XP_011526959.2
HyS0013.166	Hsap_NP_001004127.2	613666	OG0004105	1	TRUE	Hsap_NP_001004127.2
HyS0013.168	Hsap_NP_001352.2	126064	OG0003413	1	TRUE	Hsap_NP_001352.2
HyS0013.169			OG0000187	1		Hsap_NP_004073.2
HyS0013.174	Hsap_XP_005265468.1	137165	OG0000047	10	TRUE	Hsap_NP_001003841.1	Hsap_NP_001010898.1	Hsap_NP_001035.1	Hsap_NP_001036.1	Hsap_NP_004202.3	Hsap_NP_005620.1	Hsap_NP_064593.1	Hsap_NP_964012.2	Hsap_XP_005265468.1	Hsap_XP_011521597.1
HyS0013.175	Hsap_XP_006721327.1	602783	OG0001141	2	TRUE	Hsap_NP_006787.2	Hsap_XP_006721327.1
HyS0013.177	Hsap_XP_005260464.1	600281	OG0000039	18	TRUE	Hsap_NP_001017536.1	Hsap_NP_001177848.1	Hsap_NP_001193922.1	Hsap_NP_001277145.1	Hsap_NP_001278159.1	Hsap_NP_004950.2	Hsap_NP_005645.1	Hsap_NP_008845.2	Hsap_NP_055064.1	Hsap_NP_066285.1	Hsap_NP_599022.1	Hsap_NP_775292.1	Hsap_XP_005257609.1	Hsap_XP_005260464.1	Hsap_XP_006711547.2	Hsap_XP_011532354.1	Hsap_XP_011534849.1	Hsap_XP_016876569.1
HyS0013.200			OG0003145	2		Hsap_NP_000346.2	Hsap_NP_005133.2
HyS0013.201			OG0001530	2		Hsap_NP_000594.2	Hsap_NP_000616.3
HyS0013.203			OG0000223	3		Hsap_NP_001129711.1	Hsap_NP_067632.2	Hsap_XP_011529864.1
HyS0013.208			OG0000004	4		Hsap_NP_001072.2	Hsap_NP_006120.1	Hsap_NP_036596.3	Hsap_NP_113621.1
HyS0013.209			OG0000151	4		Hsap_NP_000241.1	Hsap_NP_000493.1	Hsap_NP_036425.1	Hsap_XP_024308853.1
HyS0013.210			OG0000151	4		Hsap_NP_000241.1	Hsap_NP_000493.1	Hsap_NP_036425.1	Hsap_XP_024308853.1
HyS0013.211			OG0000151	4		Hsap_NP_000241.1	Hsap_NP_000493.1	Hsap_NP_036425.1	Hsap_XP_024308853.1
HyS0013.212			OG0000004	4		Hsap_NP_001072.2	Hsap_NP_006120.1	Hsap_NP_036596.3	Hsap_NP_113621.1
HyS0013.215			OG0000057	4		Hsap_NP_001304019.1	Hsap_NP_002237.1	Hsap_NP_862823.1	Hsap_XP_011515403.1
HyS0013.219	Hsap_NP_114106.1	612471	OG0001082	2	TRUE	Hsap_NP_114106.1	Hsap_XP_011532971.1
HyS0013.222	Hsap_NP_000299.2	613111	OG0001337
HyS0013.23			OG0000105	1		Hsap_XP_016881046.1
HyS0013.233			OG0000134	4		Hsap_NP_001186326.1	Hsap_NP_001316166.1	Hsap_NP_002488.1	Hsap_XP_011522940.1
HyS0013.238	Hsap_NP_057021.2	610272	OG0004945	1	TRUE	Hsap_NP_057021.2
HyS0013.240	Hsap_NP_001338307.1	609842	OG0006121	1	TRUE	Hsap_NP_001338307.1
HyS0013.248	Hsap_NP_006787.2	604581	OG0001141	2	TRUE	Hsap_NP_006787.2	Hsap_XP_006721327.1
HyS0013.260	Hsap_XP_024306021.1	601565	OG0000556	7	TRUE	Hsap_NP_002189.1	Hsap_NP_002451.2	Hsap_NP_004022.2	Hsap_NP_006138.1	Hsap_XP_011514461.1	Hsap_XP_024306021.1	Hsap_XP_024307260.1
HyS0013.261	Hsap_NP_002451.2	601900	OG0000556	7	TRUE	Hsap_NP_002189.1	Hsap_NP_002451.2	Hsap_NP_004022.2	Hsap_NP_006138.1	Hsap_XP_011514461.1	Hsap_XP_024306021.1	Hsap_XP_024307260.1
HyS0013.266			OG0000004	4		Hsap_NP_001072.2	Hsap_NP_006120.1	Hsap_NP_036596.3	Hsap_NP_113621.1
HyS0013.272			OG0000018	3		Hsap_NP_001295051.1	Hsap_NP_003050.2	Hsap_XP_006718493.1
HyS0013.274	Hsap_NP_057368.3	604917	OG0001431	1	TRUE	Hsap_NP_057368.3
HyS0013.281			OG0000346	1		Hsap_NP_001136071.1
HyS0013.282			OG0000037	9		Hsap_NP_000803.2	Hsap_NP_000815.1	Hsap_NP_001121117.1	Hsap_NP_001139512.1	Hsap_NP_068711.1	Hsap_NP_068712.1	Hsap_NP_944493.2	Hsap_XP_016856425.1	Hsap_XP_024309731.1
HyS0013.283			OG0000151	4		Hsap_NP_000241.1	Hsap_NP_000493.1	Hsap_NP_036425.1	Hsap_XP_024308853.1
HyS0013.284			OG0000390	2		Hsap_NP_000205.1	Hsap_NP_061947.1
HyS0013.286			OG0000390	2		Hsap_NP_000205.1	Hsap_NP_061947.1
HyS0013.287	Hsap_XP_016883301.1	139320	OG0001736	2	TRUE	Hsap_NP_892023.1	Hsap_XP_016883301.1
HyS0013.290			OG0000390	2		Hsap_NP_000205.1	Hsap_NP_061947.1
HyS0013.293	Hsap_NP_001010867.1	615316	OG0005393	1	TRUE	Hsap_NP_001010867.1
HyS0013.296			OG0000398	1		Hsap_NP_001243371.1
HyS0013.297	Hsap_XP_005254259.1	609291	OG0002506
HyS0013.299	Hsap_NP_004209.2	604198	OG0001286	1	TRUE	Hsap_NP_004209.2
HyS0013.3			OG0000068	1		Hsap_NP_001243339.1
HyS0013.304			OG0002731	2		Hsap_NP_060496.2	Hsap_XP_006720153.1
HyS0013.306	Hsap_XP_011531241.1	608111	OG0006013	1	TRUE	Hsap_XP_011531241.1
HyS0013.310			OG0001617	1		Hsap_NP_005610.1
HyS0013.311			OG0006013	1		Hsap_XP_011531241.1
HyS0013.314			OG0001617	1		Hsap_NP_005610.1
HyS0013.315			OG0000834	2		Hsap_NP_005893.1	Hsap_XP_006719890.1
HyS0013.317	Hsap_NP_005576.3	602931	OG0004962	2	TRUE	Hsap_NP_005576.3	Hsap_NP_005895.1
HyS0013.318	Hsap_NP_002787.2	602177	OG0005023	1	TRUE	Hsap_NP_002787.2
HyS0013.321	Hsap_NP_001021.1	603702	OG0004844	1	TRUE	Hsap_NP_001021.1
HyS0013.326	Hsap_NP_057306.2	608170	OG0004459	1	TRUE	Hsap_NP_057306.2
HyS0013.328	Hsap_NP_037408.2	605060	OG0005981	1	TRUE	Hsap_NP_037408.2
HyS0013.336	Hsap_NP_001058.2	126430	OG0001480	1	TRUE	Hsap_NP_001058.2
HyS0013.339	Hsap_NP_001073883.2	611204	OG0000896	2	TRUE	Hsap_NP_001073883.2	Hsap_XP_005264475.1
HyS0013.343	Hsap_NP_060166.2	610098	OG0002263	1	TRUE	Hsap_NP_060166.2
HyS0013.344	Hsap_XP_016879635.1	615262	OG0000638	1	TRUE	Hsap_XP_016879635.1
HyS0013.43	Hsap_NP_060167.2	612959	OG0000520	3	TRUE	Hsap_NP_001027565.1	Hsap_NP_001185767.1	Hsap_NP_060167.2
HyS0013.44	Hsap_NP_001303963.1	603503	OG0003745	1	TRUE	Hsap_NP_001303963.1
HyS0013.47			OG0000026	4		Hsap_NP_001073327.1	Hsap_XP_006715579.1	Hsap_XP_011521763.1	Hsap_XP_011526250.1
HyS0013.50			OG0000004	4		Hsap_NP_001072.2	Hsap_NP_006120.1	Hsap_NP_036596.3	Hsap_NP_113621.1
HyS0013.51			OG0000004	4		Hsap_NP_001072.2	Hsap_NP_006120.1	Hsap_NP_036596.3	Hsap_NP_113621.1
HyS0013.53	Hsap_NP_056201.2	606976	OG0002451	1	TRUE	Hsap_NP_056201.2
HyS0013.57	Hsap_NP_212134.3	613350	OG0001054	3	TRUE	Hsap_NP_060456.3	Hsap_NP_078807.1	Hsap_NP_212134.3
HyS0013.66	Hsap_NP_001155201.1	172411	OG0006731	1	FALSE	Hsap_XP_005250856.2
HyS0013.67	Hsap_NP_000276.2	613230	OG0002982	1	TRUE	Hsap_NP_000276.2
HyS0013.68			OG0000004	4		Hsap_NP_001072.2	Hsap_NP_006120.1	Hsap_NP_036596.3	Hsap_NP_113621.1
HyS0013.69			OG0000221	1		Hsap_NP_000430.3
HyS0013.70	Hsap_NP_001405.1	606686	OG0000399
HyS0013.71			OG0002764	1		Hsap_NP_000932.3
HyS0013.72	Hsap_XP_006721184.1	602703	OG0003744	1	TRUE	Hsap_XP_006721184.1
HyS0013.75			OG0000198	7		Hsap_NP_002058.2	Hsap_NP_002061.1	Hsap_NP_002063.2	Hsap_NP_005263.1	Hsap_NP_006487.1	Hsap_NP_620073.2	Hsap_NP_653082.1
HyS0013.77			OG0000010	8		Hsap_NP_000499.1	Hsap_NP_003656.2	Hsap_NP_005132.2	Hsap_NP_055310.1	Hsap_NP_061978.6	Hsap_NP_068656.2	Hsap_XP_005272541.1	Hsap_XP_016870167.1
HyS0013.78	Hsap_NP_001001433.1	603666	OG0002803	1	TRUE	Hsap_NP_001001433.1
HyS0013.82	Hsap_XP_011521403.1	605131	OG0000100	3	TRUE	Hsap_NP_057110.3	Hsap_NP_689656.2	Hsap_XP_011521403.1
HyS0013.87			OG0000098	2		Hsap_NP_003623.1	Hsap_NP_054860.1
HyS0013.88			OG0000009	3		Hsap_NP_150241.2	Hsap_XP_005251870.1	Hsap_XP_006714220.1
HyS0013.93			OG0006255	1		Hsap_NP_001274428.1
HyS0013.95			OG0001663	1		Hsap_NP_060277.1
HyS0013.97			OG0002803	1		Hsap_NP_001001433.1
HyS0013.98			OG0000010	8		Hsap_NP_000499.1	Hsap_NP_003656.2	Hsap_NP_005132.2	Hsap_NP_055310.1	Hsap_NP_061978.6	Hsap_NP_068656.2	Hsap_XP_005272541.1	Hsap_XP_016870167.1
HyS0013.99	Hsap_NP_001274428.1	617631	OG0006255	1	TRUE	Hsap_NP_001274428.1
HyS0014.101	Hsap_XP_006720179.1	604395	OG0005152	1	TRUE	Hsap_XP_006720179.1
HyS0014.108			OG0000009	3		Hsap_NP_150241.2	Hsap_XP_005251870.1	Hsap_XP_006714220.1
HyS0014.112	Hsap_NP_001258370.1	603191	OG0005819	1	TRUE	Hsap_NP_001258370.1
HyS0014.116			OG0001461	1		Hsap_XP_024308940.1
HyS0014.119	Hsap_NP_001308943.1	600259	OG0001439	1	TRUE	Hsap_NP_001308943.1
HyS0014.130			OG0000663	2		Hsap_NP_001341618.1	Hsap_XP_016868047.1
HyS0014.132	Hsap_NP_149115.2	611088	OG0004692	1	TRUE	Hsap_NP_149115.2
HyS0014.133	Hsap_NP_872354.1	609427	OG0000810	1	TRUE	Hsap_NP_872354.1
HyS0014.134	Hsap_NP_644814.1	611398	OG0000879	1	TRUE	Hsap_NP_644814.1
HyS0014.147			OG0001136	1		Hsap_NP_000374.1
HyS0014.149	Hsap_XP_005259674.1	602216	OG0004455	1	TRUE	Hsap_XP_005259674.1
HyS0014.15			OG0000227	1		Hsap_NP_065094.3
HyS0014.152			OG0000446	1		Hsap_XP_011519666.1
HyS0014.153	Hsap_XP_011522392.1	617112	OG0006529	1	TRUE	Hsap_XP_011522392.1
HyS0014.154	Hsap_NP_066925.1	605124	OG0000132	1	TRUE	Hsap_NP_066925.1
HyS0014.164	Hsap_NP_694578.1	611725	OG0002951
HyS0014.169	Hsap_XP_005266211.1	600844	OG0001238	1	TRUE	Hsap_XP_005266211.1
HyS0014.170			OG0000030	1		Hsap_XP_016877107.1
HyS0014.173			OG0000532	2		Hsap_NP_000086.2	Hsap_NP_003238.2
HyS0014.183			OG0000465	1		Hsap_NP_001008223.1
HyS0014.184			OG0001494	1		Hsap_XP_016868511.1
HyS0014.185	Hsap_NP_653269.3	618146	OG0003877	1	TRUE	Hsap_NP_653269.3
HyS0014.192			OG0002467	1		Hsap_NP_733746.1
HyS0014.193			OG0002467	1		Hsap_NP_733746.1
HyS0014.196			OG0000004	4		Hsap_NP_001072.2	Hsap_NP_006120.1	Hsap_NP_036596.3	Hsap_NP_113621.1
HyS0014.197	Hsap_NP_001678.1	603150	OG0000701
HyS0014.207			OG0000498	1		Hsap_XP_016883653.1
HyS0014.21			OG0000064	2		Hsap_NP_001091109.1	Hsap_XP_005259583.1
HyS0014.213			OG0000026	4		Hsap_NP_001073327.1	Hsap_XP_006715579.1	Hsap_XP_011521763.1	Hsap_XP_011526250.1
HyS0014.214	Hsap_NP_005793.2	609507	OG0004316
HyS0014.218	Hsap_XP_011536382.1	608771	OG0002246	1	TRUE	Hsap_XP_011536382.1
HyS0014.219			OG0002246	1		Hsap_XP_011536382.1
HyS0014.22			OG0000064	2		Hsap_NP_001091109.1	Hsap_XP_005259583.1
HyS0014.220			OG0002246	1		Hsap_XP_011536382.1
HyS0014.222	Hsap_NP_004364.2	602072	OG0002677	2	TRUE	Hsap_NP_004364.2	Hsap_NP_005196.1
HyS0014.230			OG0000014	18		Hsap_NP_000450.2	Hsap_NP_001341913.1	Hsap_NP_002244.1	Hsap_NP_002520.2	Hsap_NP_004110.2	Hsap_NP_004551.2	Hsap_NP_005003.2	Hsap_NP_006171.2	Hsap_NP_006334.2	Hsap_NP_066124.1	Hsap_XP_005252051.1	Hsap_XP_005265227.2	Hsap_XP_006713931.1	Hsap_XP_006717771.1	Hsap_XP_011507889.1	Hsap_XP_011514525.1	Hsap_XP_011532780.1	Hsap_XP_011542745.1
HyS0014.232			OG0000030	1		Hsap_XP_016877107.1
HyS0014.242	Hsap_XP_011536085.1	605629	OG0000253	2	TRUE	Hsap_NP_001275693.1	Hsap_XP_011536085.1
HyS0014.245	Hsap_NP_001157281.1	614218	OG0002895	1	TRUE	Hsap_NP_001157281.1
HyS0014.268			OG0000065	3		Hsap_NP_001264044.1	Hsap_XP_011522005.1	Hsap_XP_016861618.1
HyS0014.269			OG0000030	1		Hsap_XP_016877107.1
HyS0014.28	Hsap_NP_000088.3	612732	OG0003214	1	TRUE	Hsap_NP_000088.3
HyS0014.285	Hsap_NP_002406.1	153620	OG0002052	1	TRUE	Hsap_NP_002406.1
HyS0014.29			OG0003214	1		Hsap_NP_000088.3
HyS0014.292	Hsap_NP_006758.2	600574	OG0001552	1	TRUE	Hsap_NP_006758.2
HyS0014.297	Hsap_NP_002991.2	185470	OG0004099	1	TRUE	Hsap_NP_002991.2
HyS0014.299			OG0000455	2		Hsap_NP_009223.2	Hsap_XP_005265562.1
HyS0014.3			OG0000172	2		Hsap_NP_001338233.1	Hsap_NP_038265.2
HyS0014.30			OG0002055	1		Hsap_NP_001305127.1
HyS0014.300			OG0000455	2		Hsap_NP_009223.2	Hsap_XP_005265562.1
HyS0014.302	Hsap_NP_001299.1	603103	OG0000375	2	TRUE	Hsap_NP_001120.3	Hsap_NP_001299.1
HyS0014.305			OG0000199	3		Hsap_NP_001345.1	Hsap_NP_001809.3	Hsap_NP_005980.1
HyS0014.306	Hsap_XP_011536022.1	605093	OG0004318	1	TRUE	Hsap_XP_011536022.1
HyS0014.310	Hsap_NP_000264.2	300808	OG0004257
HyS0014.312			OG0003733	1		Hsap_XP_016866397.1
HyS0014.319	Hsap_NP_004773.1	604202	OG0000918	2	TRUE	Hsap_NP_001309837.1	Hsap_NP_004773.1
HyS0014.324	Hsap_NP_008826.1	605238	OG0000660	1	TRUE	Hsap_NP_008826.1
HyS0014.33			OG0000734	1		Hsap_NP_000164.5
HyS0014.333	Hsap_NP_002487.1	602141	OG0004627	1	TRUE	Hsap_NP_002487.1
HyS0014.334			OG0000235	2		Hsap_NP_001139248.1	Hsap_NP_060416.1
HyS0014.344			OG0000187	1		Hsap_NP_004073.2
HyS0014.347	Hsap_NP_000285.1	172471	OG0003446	1	TRUE	Hsap_NP_000285.1
HyS0014.348			OG0005890	1		Hsap_NP_004764.1
HyS0014.349	Hsap_NP_001600.1	600301	OG0001366	2	TRUE	Hsap_NP_000008.1	Hsap_NP_001600.1
HyS0014.350			OG0000293	3		Hsap_NP_006604.1	Hsap_NP_036252.1	Hsap_XP_011543800.1
HyS0014.351			OG0000682	3		Hsap_NP_000256.4	Hsap_NP_038202.2	Hsap_XP_016864840.1
HyS0014.352			OG0002089	1		Hsap_NP_006288.2
HyS0014.353			OG0000099	9		Hsap_NP_002412.1	Hsap_NP_002413.1	Hsap_NP_002418.1	Hsap_NP_002420.1	Hsap_NP_004521.1	Hsap_NP_004762.2	Hsap_NP_004985.2	Hsap_NP_004986.1	Hsap_NP_671724.1
HyS0014.360	Hsap_NP_038265.2	612346	OG0000172	2	TRUE	Hsap_NP_001338233.1	Hsap_NP_038265.2
HyS0014.37			OG0000406	1		Hsap_XP_005261565.1
HyS0014.4			OG0000123	5		Hsap_NP_000058.1	Hsap_NP_001209.1	Hsap_NP_001308766.1	Hsap_XP_005257696.1	Hsap_XP_011521611.1
HyS0014.42			OG0000426	4		Hsap_NP_055542.1	Hsap_XP_011537072.1	Hsap_XP_011541131.1	Hsap_XP_016867969.1
HyS0014.47			OG0000128	1		Hsap_XP_011541141.1
HyS0014.55			OG0000172	2		Hsap_NP_001338233.1	Hsap_NP_038265.2
HyS0014.58	Hsap_NP_001129965.1	614397	OG0001837
HyS0014.59			OG0002807	1		Hsap_XP_005257069.1
HyS0014.61	Hsap_XP_005257069.1	118955	OG0002807	1	TRUE	Hsap_XP_005257069.1
HyS0014.65			OG0000105	1		Hsap_XP_016881046.1
HyS0014.67	Hsap_XP_016884978.1	300139	OG0004274	1	TRUE	Hsap_XP_016884978.1
HyS0014.68	Hsap_NP_000172.2	611499	OG0001657	1	TRUE	Hsap_NP_000172.2
HyS0014.77			OG0000286	4		Hsap_NP_000061.1	Hsap_NP_001185798.1	Hsap_NP_075571.1	Hsap_XP_011543527.1
HyS0014.84	Hsap_NP_000259.1	607379	OG0000944	3	TRUE	Hsap_NP_000259.1	Hsap_NP_001247421.1	Hsap_XP_011529261.1
HyS0014.85	Hsap_NP_009133.2	604694	OG0005634	1	TRUE	Hsap_NP_009133.2
HyS0014.86	Hsap_NP_005985.3	600747	OG0010132
HyS0014.87	Hsap_NP_112192.2	608204	OG0000645
HyS0015.1	Hsap_NP_696996.1	601097	OG0010571
HyS0015.10			OG0000020	10		Hsap_NP_001317366.1	Hsap_NP_002818.1	Hsap_NP_002826.3	Hsap_NP_002829.3	Hsap_NP_057051.3	Hsap_NP_109592.1	Hsap_XP_005271136.1	Hsap_XP_016873572.1	Hsap_XP_016874762.1	Hsap_XP_024304527.1
HyS0015.101			OG0000014	18		Hsap_NP_000450.2	Hsap_NP_001341913.1	Hsap_NP_002244.1	Hsap_NP_002520.2	Hsap_NP_004110.2	Hsap_NP_004551.2	Hsap_NP_005003.2	Hsap_NP_006171.2	Hsap_NP_006334.2	Hsap_NP_066124.1	Hsap_XP_005252051.1	Hsap_XP_005265227.2	Hsap_XP_006713931.1	Hsap_XP_006717771.1	Hsap_XP_011507889.1	Hsap_XP_011514525.1	Hsap_XP_011532780.1	Hsap_XP_011542745.1
HyS0015.110	Hsap_NP_113609.1	617095	OG0002242	1	TRUE	Hsap_NP_113609.1
HyS0015.111	Hsap_NP_001166938.1	606633	OG0000148	4	TRUE	Hsap_NP_001166938.1	Hsap_NP_001291.3	Hsap_NP_003588.1	Hsap_NP_006554.1
HyS0015.113	Hsap_NP_004516.2	600073	OG0000056	10	TRUE	Hsap_NP_000518.1	Hsap_NP_002325.2	Hsap_NP_002327.2	Hsap_NP_003374.3	Hsap_NP_004516.2	Hsap_NP_057663.1	Hsap_XP_005271230.1	Hsap_XP_011543331.1	Hsap_XP_016863334.1	Hsap_XP_016874792.1
HyS0015.114			OG0000458	1		Hsap_NP_054895.1
HyS0015.115	Hsap_NP_001477.2	600842	OG0007738	1	TRUE	Hsap_NP_001477.2
HyS0015.116			OG0000088	6		Hsap_NP_000543.2	Hsap_NP_001264198.1	Hsap_NP_002449.2	Hsap_NP_005413.2	Hsap_NP_597725.1	Hsap_XP_005268859.1
HyS0015.119	Hsap_XP_016861395.1	608112	OG0002980	1	TRUE	Hsap_XP_016861395.1
HyS0015.120			OG0000683	1		Hsap_XP_024309849.1
HyS0015.121	Hsap_NP_079100.2	613279	OG0004644	1	TRUE	Hsap_NP_079100.2
HyS0015.126			OG0000105	1		Hsap_XP_016881046.1
HyS0015.132			OG0000039	18		Hsap_NP_001017536.1	Hsap_NP_001177848.1	Hsap_NP_001193922.1	Hsap_NP_001277145.1	Hsap_NP_001278159.1	Hsap_NP_004950.2	Hsap_NP_005645.1	Hsap_NP_008845.2	Hsap_NP_055064.1	Hsap_NP_066285.1	Hsap_NP_599022.1	Hsap_NP_775292.1	Hsap_XP_005257609.1	Hsap_XP_005260464.1	Hsap_XP_006711547.2	Hsap_XP_011532354.1	Hsap_XP_011534849.1	Hsap_XP_016876569.1
HyS0015.135			OG0000767	1		Hsap_XP_016876625.1
HyS0015.136			OG0000767	1		Hsap_XP_016876625.1
HyS0015.137	Hsap_XP_011523843.1	602627	OG0001177	2	TRUE	Hsap_NP_001177747.1	Hsap_XP_011523843.1
HyS0015.140			OG0000767	1		Hsap_XP_016876625.1
HyS0015.141			OG0000620	1		Hsap_NP_060814.4
HyS0015.142	Hsap_NP_001309837.1	600322	OG0000918	2	TRUE	Hsap_NP_001309837.1	Hsap_NP_004773.1
HyS0015.143			OG0000918	2		Hsap_NP_001309837.1	Hsap_NP_004773.1
HyS0015.144			OG0000918	2		Hsap_NP_001309837.1	Hsap_NP_004773.1
HyS0015.145			OG0000918	2		Hsap_NP_001309837.1	Hsap_NP_004773.1
HyS0015.150			OG0000242	5		Hsap_NP_000385.1	Hsap_NP_001276736.1	Hsap_NP_001531.1	Hsap_NP_006299.1	Hsap_NP_055180.1
HyS0015.151			OG0000934	3		Hsap_NP_001894.2	Hsap_XP_016871641.1	Hsap_XP_024308482.1
HyS0015.154	Hsap_XP_016864962.1	159350	OG0003061	1	TRUE	Hsap_XP_016864962.1
HyS0015.157			OG0000242	5		Hsap_NP_000385.1	Hsap_NP_001276736.1	Hsap_NP_001531.1	Hsap_NP_006299.1	Hsap_NP_055180.1
HyS0015.159			OG0000209	2		Hsap_NP_001030025.1	Hsap_NP_001339431.1
HyS0015.160			OG0000934	3		Hsap_NP_001894.2	Hsap_XP_016871641.1	Hsap_XP_024308482.1
HyS0015.161	Hsap_NP_001254479.2	188840	OG0000334	3	FALSE	Hsap_NP_149109.1	Hsap_XP_011508781.1	Hsap_XP_024309300.1
HyS0015.162	Hsap_XP_005256484.1	602120	OG0001741	2	TRUE	Hsap_XP_005256484.1	Hsap_XP_024304570.1
HyS0015.163	Hsap_NP_001091680.1	116806	OG0002815	2	TRUE	Hsap_NP_001091680.1	Hsap_XP_016880077.1
HyS0015.164			OG0000009	3		Hsap_NP_150241.2	Hsap_XP_005251870.1	Hsap_XP_006714220.1
HyS0015.166			OG0000187	1		Hsap_NP_004073.2
HyS0015.169			OG0000170	6		Hsap_NP_000341.2	Hsap_NP_001080.2	Hsap_NP_758424.1	Hsap_XP_011509253.1	Hsap_XP_016869869.1	Hsap_XP_024307084.1
HyS0015.171			OG0000170	6		Hsap_NP_000341.2	Hsap_NP_001080.2	Hsap_NP_758424.1	Hsap_XP_011509253.1	Hsap_XP_016869869.1	Hsap_XP_024307084.1
HyS0015.175	Hsap_XP_011513891.1	610531	OG0003714	1	TRUE	Hsap_XP_011513891.1
HyS0015.176			OG0000175	3		Hsap_NP_001121170.1	Hsap_NP_001292204.1	Hsap_NP_001341895.1
HyS0015.18			OG0000192	4		Hsap_NP_001191732.1	Hsap_NP_001300655.1	Hsap_NP_001333396.1	Hsap_NP_998764.1
HyS0015.181	Hsap_NP_775873.2	611379	OG0001924	1	TRUE	Hsap_NP_775873.2
HyS0015.182			OG0000802	4		Hsap_NP_057278.2	Hsap_XP_005247749.1	Hsap_XP_011519255.1	Hsap_XP_016856549.1
HyS0015.185			OG0000011	11		Hsap_NP_001157814.1	Hsap_NP_001316524.1	Hsap_NP_001336347.1	Hsap_NP_005997.2	Hsap_NP_006054.2	Hsap_NP_055612.2	Hsap_NP_059111.2	Hsap_NP_071324.1	Hsap_NP_085127.2	Hsap_NP_689606.2	Hsap_XP_006715816.1
HyS0015.187			OG0000458	1		Hsap_NP_054895.1
HyS0015.192	Hsap_XP_011534738.1	609840	OG0000427	3	TRUE	Hsap_NP_995322.1	Hsap_XP_011534738.1	Hsap_XP_024305871.1
HyS0015.195			OG0000270	1		Hsap_NP_006199.2
HyS0015.196	Hsap_NP_001612.1	600253	OG0002190	1	TRUE	Hsap_NP_001612.1
HyS0015.198	Hsap_NP_004216.2	605352	OG0001162	1	TRUE	Hsap_NP_004216.2
HyS0015.199	Hsap_NP_001335874.1	171050	OG0000397	3	TRUE	Hsap_NP_001335874.1	Hsap_XP_011510380.1	Hsap_XP_011514610.3
HyS0015.2			OG0000495	1		Hsap_NP_005528.4
HyS0015.212			OG0000024	2		Hsap_NP_001138724.1	Hsap_NP_114141.2
HyS0015.214			OG0000024	2		Hsap_NP_001138724.1	Hsap_NP_114141.2
HyS0015.215			OG0000105	1		Hsap_XP_016881046.1
HyS0015.23	Hsap_NP_001252521.1	611101	OG0001038	1	TRUE	Hsap_NP_001252521.1
HyS0015.247			OG0000065	3		Hsap_NP_001264044.1	Hsap_XP_011522005.1	Hsap_XP_016861618.1
HyS0015.249	Hsap_NP_006493.1	603968	OG0001748	1	TRUE	Hsap_NP_006493.1
HyS0015.250			OG0000394	2		Hsap_NP_057737.2	Hsap_NP_663304.1
HyS0015.253	Hsap_XP_016876053.1	601837	OG0003323	1	TRUE	Hsap_XP_016876053.1
HyS0015.259			OG0000314	2		Hsap_NP_000229.1	Hsap_NP_758872.1
HyS0015.26	Hsap_NP_009193.2	602533	OG0004285	1	TRUE	Hsap_NP_009193.2
HyS0015.264	Hsap_NP_058214.1	601982	OG0004804	1	TRUE	Hsap_NP_058214.1
HyS0015.265	Hsap_NP_037467.2	615495	OG0004683	1	TRUE	Hsap_NP_037467.2
HyS0015.266			OG0000269	2		Hsap_NP_001121620.1	Hsap_XP_016868062.1
HyS0015.275	Hsap_XP_016872571.1	605577	OG0002155	1	TRUE	Hsap_XP_016872571.1
HyS0015.28	Hsap_XP_011531878.1	609512	OG0001322	1	TRUE	Hsap_XP_011531878.1
HyS0015.280			OG0000266	3		Hsap_NP_001296122.1	Hsap_NP_004422.2	Hsap_XP_016867305.1
HyS0015.282			OG0000266	3		Hsap_NP_001296122.1	Hsap_NP_004422.2	Hsap_XP_016867305.1
HyS0015.283	Hsap_NP_001296122.1	600997	OG0000266	3	TRUE	Hsap_NP_001296122.1	Hsap_NP_004422.2	Hsap_XP_016867305.1
HyS0015.285			OG0000031	14		Hsap_NP_001231739.1	Hsap_NP_001442.2	Hsap_NP_001444.2	Hsap_NP_002006.2	Hsap_NP_004464.2	Hsap_NP_005240.3	Hsap_NP_005242.1	Hsap_NP_036315.1	Hsap_NP_036318.1	Hsap_NP_036320.2	Hsap_NP_075555.1	Hsap_XP_011523661.1	Hsap_XP_016868290.1	Hsap_XP_016885056.1
HyS0015.289	Hsap_NP_068374.1	600037	OG0000038	20	TRUE	Hsap_NP_000316.2	Hsap_NP_000442.1	Hsap_NP_000545.1	Hsap_NP_001306003.1	Hsap_NP_002644.4	Hsap_NP_003856.1	Hsap_NP_003915.2	Hsap_NP_005020.1	Hsap_NP_005160.2	Hsap_NP_006252.3	Hsap_NP_006483.2	Hsap_NP_008913.2	Hsap_NP_038463.2	Hsap_NP_055403.2	Hsap_NP_068374.1	Hsap_NP_068745.2	Hsap_NP_073207.1	Hsap_NP_620689.1	Hsap_NP_776248.1	Hsap_NP_878314.1
HyS0015.297			OG0000024	2		Hsap_NP_001138724.1	Hsap_NP_114141.2
HyS0015.3	Hsap_NP_005528.4	601566	OG0000495	1	TRUE	Hsap_NP_005528.4
HyS0015.34	Hsap_NP_060767.2	610661	OG0003583	1	TRUE	Hsap_NP_060767.2
HyS0015.35	Hsap_XP_016876625.1	602589	OG0000767	1	TRUE	Hsap_XP_016876625.1
HyS0015.36			OG0000623	1		Hsap_XP_024304405.1
HyS0015.44			OG0001139	1		Hsap_XP_006710819.1
HyS0015.5	Hsap_NP_066000.2	615720	OG0000303	1	TRUE	Hsap_NP_066000.2
HyS0015.50			OG0004183	1		Hsap_XP_016868819.1
HyS0015.51			OG0004183	1		Hsap_XP_016868819.1
HyS0015.56			OG0000078	6		Hsap_NP_001230526.1	Hsap_NP_005206.2	Hsap_NP_055628.1	Hsap_NP_061928.4	Hsap_NP_071765.2	Hsap_XP_011532283.1
HyS0015.6	Hsap_XP_011539174.1	600423	OG0000072	5	TRUE	Hsap_NP_000435.3	Hsap_NP_004817.2	Hsap_XP_005250050.1	Hsap_XP_011511158.1	Hsap_XP_011539174.1
HyS0015.7			OG0001769	1		Hsap_XP_024307550.1
HyS0015.73	Hsap_XP_011531934.1	612778	OG0000647	3	TRUE	Hsap_XP_011531934.1	Hsap_XP_016857273.1	Hsap_XP_024301920.1
HyS0015.77	Hsap_NP_963890.2	600003	OG0001706	2	TRUE	Hsap_NP_000717.2	Hsap_NP_963890.2
HyS0015.84			OG0000010	8		Hsap_NP_000499.1	Hsap_NP_003656.2	Hsap_NP_005132.2	Hsap_NP_055310.1	Hsap_NP_061978.6	Hsap_NP_068656.2	Hsap_XP_005272541.1	Hsap_XP_016870167.1
HyS0015.85			OG0000010	8		Hsap_NP_000499.1	Hsap_NP_003656.2	Hsap_NP_005132.2	Hsap_NP_055310.1	Hsap_NP_061978.6	Hsap_NP_068656.2	Hsap_XP_005272541.1	Hsap_XP_016870167.1
HyS0015.86			OG0000010	8		Hsap_NP_000499.1	Hsap_NP_003656.2	Hsap_NP_005132.2	Hsap_NP_055310.1	Hsap_NP_061978.6	Hsap_NP_068656.2	Hsap_XP_005272541.1	Hsap_XP_016870167.1
HyS0015.87			OG0000010	8		Hsap_NP_000499.1	Hsap_NP_003656.2	Hsap_NP_005132.2	Hsap_NP_055310.1	Hsap_NP_061978.6	Hsap_NP_068656.2	Hsap_XP_005272541.1	Hsap_XP_016870167.1
HyS0015.9			OG0000020	10		Hsap_NP_001317366.1	Hsap_NP_002818.1	Hsap_NP_002826.3	Hsap_NP_002829.3	Hsap_NP_057051.3	Hsap_NP_109592.1	Hsap_XP_005271136.1	Hsap_XP_016873572.1	Hsap_XP_016874762.1	Hsap_XP_024304527.1
HyS0015.95			OG0000012	8		Hsap_NP_001242914.1	Hsap_NP_006429.2	Hsap_NP_055072.3	Hsap_NP_056532.4	Hsap_NP_066978.1	Hsap_NP_922938.1	Hsap_XP_005270185.1	Hsap_XP_011538118.1
HyS0016.104			OG0000004	4		Hsap_NP_001072.2	Hsap_NP_006120.1	Hsap_NP_036596.3	Hsap_NP_113621.1
HyS0016.105			OG0000004	4		Hsap_NP_001072.2	Hsap_NP_006120.1	Hsap_NP_036596.3	Hsap_NP_113621.1
HyS0016.110			OG0000140	1		Hsap_NP_004125.3
HyS0016.111			OG0001292	1		Hsap_NP_060283.3
HyS0016.122	Hsap_NP_115785.1	608309	OG0001069
HyS0016.125			OG0000035	9		Hsap_NP_000208.2	Hsap_NP_001106212.1	Hsap_NP_002224.1	Hsap_NP_002225.2	Hsap_NP_004965.1	Hsap_NP_004968.2	Hsap_NP_598004.1	Hsap_XP_005270908.1	Hsap_XP_011527101.1
HyS0016.127			OG0003737	1		Hsap_NP_001152759.1
HyS0016.128			OG0000035	9		Hsap_NP_000208.2	Hsap_NP_001106212.1	Hsap_NP_002224.1	Hsap_NP_002225.2	Hsap_NP_004965.1	Hsap_NP_004968.2	Hsap_NP_598004.1	Hsap_XP_005270908.1	Hsap_XP_011527101.1
HyS0016.129	Hsap_NP_001152759.1	190450	OG0003737	1	TRUE	Hsap_NP_001152759.1
HyS0016.13			OG0000528	1		Hsap_NP_861441.2
HyS0016.133			OG0000752	3		Hsap_NP_001036002.1	Hsap_NP_775924.1	Hsap_XP_016885394.1
HyS0016.135			OG0000068	1		Hsap_NP_001243339.1
HyS0016.138	Hsap_XP_011535435.1	191050	OG0002664	1	TRUE	Hsap_XP_011535435.1
HyS0016.139			OG0006307	1		Hsap_NP_003192.1
HyS0016.141			OG0000024	2		Hsap_NP_001138724.1	Hsap_NP_114141.2
HyS0016.142			OG0000027	7		Hsap_NP_000249.1	Hsap_NP_001292553.1	Hsap_NP_001305425.1	Hsap_NP_524144.1	Hsap_XP_006720321.1	Hsap_XP_011543483.1	Hsap_XP_016880172.1
HyS0016.143	Hsap_NP_000061.1	114240	OG0000286	4	TRUE	Hsap_NP_000061.1	Hsap_NP_001185798.1	Hsap_NP_075571.1	Hsap_XP_011543527.1
HyS0016.146	Hsap_XP_011535336.1	609644	OG0002550	1	TRUE	Hsap_XP_011535336.1
HyS0016.153			OG0000107	1		Hsap_NP_001937.2
HyS0016.162			OG0000102	2		Hsap_NP_078918.3	Hsap_XP_005246506.1
HyS0016.164	Hsap_NP_054890.1	604594	OG0005896	1	TRUE	Hsap_NP_054890.1
HyS0016.166			OG0000941	1		Hsap_XP_011518905.1
HyS0016.167	Hsap_NP_001017989.2	606580	OG0005318	1	TRUE	Hsap_NP_001017989.2
HyS0016.168	Hsap_NP_777576.1	605981	OG0001892	1	TRUE	Hsap_NP_777576.1
HyS0016.171			OG0000046	12		Hsap_NP_000465.1	Hsap_NP_001004311.2	Hsap_NP_002491.2	Hsap_NP_004307.2	Hsap_NP_005412.1	Hsap_NP_006151.3	Hsap_NP_476527.1	Hsap_NP_660161.1	Hsap_NP_835455.1	Hsap_XP_016857678.1	Hsap_XP_016871769.1	Hsap_XP_024307284.1
HyS0016.176			OG0007648	1		Hsap_XP_011527598.1
HyS0016.18	Hsap_NP_003667.1	615843	OG0002018	1	TRUE	Hsap_NP_003667.1
HyS0016.180			OG0000442	1		Hsap_XP_011542295.1
HyS0016.185	Hsap_NP_001202.4	602860	OG0001728	2	TRUE	Hsap_NP_001202.4	Hsap_NP_004327.1
HyS0016.188	Hsap_NP_002700.1	600590	OG0000533	1	TRUE	Hsap_NP_002700.1
HyS0016.189			OG0000390	2		Hsap_NP_000205.1	Hsap_NP_061947.1
HyS0016.190			OG0001364	1		Hsap_XP_011521707.1
HyS0016.194	Hsap_XP_011519572.1	607465	OG0005303	1	TRUE	Hsap_XP_011519572.1
HyS0016.2			OG0000052	3		Hsap_XP_006711325.1	Hsap_XP_011537012.1	Hsap_XP_016855798.1
HyS0016.20	Hsap_NP_644808.1	607788	OG0001077	1	TRUE	Hsap_NP_644808.1
HyS0016.201			OG0003522	1		Hsap_NP_056444.3
HyS0016.203	Hsap_NP_004172.2	191342	OG0002755	1	TRUE	Hsap_NP_004172.2
HyS0016.204			OG0002755	1		Hsap_NP_004172.2
HyS0016.206			OG0000006	22		Hsap_NP_000124.1	Hsap_NP_000292.1	Hsap_NP_000495.1	Hsap_NP_000497.1	Hsap_NP_001088.2	Hsap_NP_001182058.1	Hsap_NP_001275929.1	Hsap_NP_001290343.1	Hsap_NP_002248.1	Hsap_NP_004123.1	Hsap_NP_004908.4	Hsap_NP_006578.2	Hsap_NP_068813.1	Hsap_NP_076927.1	Hsap_XP_005262878.1	Hsap_XP_011514713.1	Hsap_XP_011527957.1	Hsap_XP_011530232.1	Hsap_XP_011535776.2	Hsap_XP_011538168.1	Hsap_XP_011538852.1	Hsap_XP_024308770.1
HyS0016.207	Hsap_NP_478059.1	610936	OG0004957	1	TRUE	Hsap_NP_478059.1
HyS0016.209	Hsap_NP_001092872.1	603544	OG0000748	2	TRUE	Hsap_NP_001092872.1	Hsap_NP_689487.2
HyS0016.214			OG0005303	1		Hsap_XP_011519572.1
HyS0016.228	Hsap_XP_016879271.1	607838	OG0006890	1	TRUE	Hsap_XP_016879271.1
HyS0016.231			OG0000843	1		Hsap_NP_001121082.1
HyS0016.235			OG0000476	1		Hsap_NP_009075.1
HyS0016.237	Hsap_NP_005852.2	607207	OG0002811	1	TRUE	Hsap_NP_005852.2
HyS0016.238	Hsap_NP_073610.2	611761	OG0001070
HyS0016.239			OG0000465	1		Hsap_NP_001008223.1
HyS0016.247			OG0000062	3		Hsap_NP_000288.1	Hsap_XP_016867287.1	Hsap_XP_024306066.1
HyS0016.25			OG0000141	2		Hsap_NP_055085.1	Hsap_XP_011535601.1
HyS0016.250			OG0000062	3		Hsap_NP_000288.1	Hsap_XP_016867287.1	Hsap_XP_024306066.1
HyS0016.256	Hsap_NP_434700.2	607212	OG0005904
HyS0016.258	Hsap_NP_001317316.1	608680	OG0005614	1	TRUE	Hsap_NP_001317316.1
HyS0016.259	Hsap_NP_000970.1	604179	OG0004091	1	TRUE	Hsap_NP_000970.1
HyS0016.266			OG0000319	1		Hsap_NP_775766.2
HyS0016.267			OG0000319	1		Hsap_NP_775766.2
HyS0016.27			OG0000141	2		Hsap_NP_055085.1	Hsap_XP_011535601.1
HyS0016.273	Hsap_NP_115647.2	606692	OG0001579	1	TRUE	Hsap_NP_115647.2
HyS0016.275			OG0000469	3		Hsap_XP_011522557.1	Hsap_XP_016869745.1	Hsap_XP_024306385.1
HyS0016.283			OG0000168	1		Hsap_NP_005312.1
HyS0016.294	Hsap_NP_001305068.1	606078	OG0004761
HyS0016.295	Hsap_NP_031373.2	607244	OG0005840	1	TRUE	Hsap_NP_031373.2
HyS0016.299	Hsap_XP_016884294.1	160775	OG0000348	8	TRUE	Hsap_NP_001035203.1	Hsap_NP_002462.2	Hsap_NP_002463.2	Hsap_NP_060004.3	Hsap_XP_011522172.1	Hsap_XP_011525622.1	Hsap_XP_016876829.1	Hsap_XP_016884294.1
HyS0016.301	Hsap_XP_016880525.1	606236	OG0004659	1	TRUE	Hsap_XP_016880525.1
HyS0016.304	Hsap_NP_001089.1	100850	OG0003146	1	TRUE	Hsap_NP_001089.1
HyS0016.308	Hsap_XP_024306066.1	601313	OG0000062	3	TRUE	Hsap_NP_000288.1	Hsap_XP_016867287.1	Hsap_XP_024306066.1
HyS0016.310			OG0000062	3		Hsap_NP_000288.1	Hsap_XP_016867287.1	Hsap_XP_024306066.1
HyS0016.312	Hsap_NP_001032.2	609845	OG0000527	2	TRUE	Hsap_NP_001032.2	Hsap_NP_001073272.1
HyS0016.319	Hsap_NP_001034230.1	609761	OG0007901
HyS0016.322	Hsap_XP_024306618.1	605367	OG0002385	1	TRUE	Hsap_XP_024306618.1
HyS0016.323			OG0004837	1		Hsap_NP_060345.2
HyS0016.331			OG0002385	1		Hsap_XP_024306618.1
HyS0016.333	Hsap_NP_060345.2	610819	OG0004837	1	TRUE	Hsap_NP_060345.2
HyS0016.35			OG0000078	6		Hsap_NP_001230526.1	Hsap_NP_005206.2	Hsap_NP_055628.1	Hsap_NP_061928.4	Hsap_NP_071765.2	Hsap_XP_011532283.1
HyS0016.36	Hsap_NP_001291347.1	616112	OG0001225	1	TRUE	Hsap_NP_001291347.1
HyS0016.37			OG0000068	1		Hsap_NP_001243339.1
HyS0016.4			OG0000051	3		Hsap_NP_004347.1	Hsap_NP_004606.2	Hsap_NP_620599.1
HyS0016.41			OG0001124	1		Hsap_XP_011534904.1
HyS0016.43	Hsap_XP_011534904.1	606241	OG0001124	1	TRUE	Hsap_XP_011534904.1
HyS0016.44	Hsap_NP_079413.3	610844	OG0001919	1	TRUE	Hsap_NP_079413.3
HyS0016.5			OG0004505	1		Hsap_XP_005271831.1
HyS0016.53	Hsap_XP_011542334.1	606897	OG0000226	4	TRUE	Hsap_XP_005263430.1	Hsap_XP_011530059.1	Hsap_XP_011542334.1	Hsap_XP_016861499.1
HyS0016.58	Hsap_XP_011523520.1	607211	OG0000332	2	FALSE	Hsap_NP_001163887.1	Hsap_XP_006724688.1
HyS0016.59			OG0000169	1		Hsap_NP_055105.2
HyS0016.61			OG0000044	10		Hsap_NP_001274273.1	Hsap_NP_004295.2	Hsap_NP_005537.3	Hsap_NP_009297.2	Hsap_XP_011523331.1	Hsap_XP_011542127.1	Hsap_XP_016856524.1	Hsap_XP_016860356.1	Hsap_XP_016883514.1	Hsap_XP_024302815.1
HyS0016.63	Hsap_NP_113615.2	610062	OG0005012	1	TRUE	Hsap_NP_113615.2
HyS0016.68	Hsap_NP_055051.1	602744	OG0004266	1	TRUE	Hsap_NP_055051.1
HyS0016.80			OG0000330	2		Hsap_NP_000378.1	Hsap_NP_055067.1
HyS0016.81			OG0000330	2		Hsap_NP_000378.1	Hsap_NP_055067.1
HyS0016.83			OG0000031	14		Hsap_NP_001231739.1	Hsap_NP_001442.2	Hsap_NP_001444.2	Hsap_NP_002006.2	Hsap_NP_004464.2	Hsap_NP_005240.3	Hsap_NP_005242.1	Hsap_NP_036315.1	Hsap_NP_036318.1	Hsap_NP_036320.2	Hsap_NP_075555.1	Hsap_XP_011523661.1	Hsap_XP_016868290.1	Hsap_XP_016885056.1
HyS0016.85	Hsap_NP_000289.1	609712	OG0001503	1	TRUE	Hsap_NP_000289.1
HyS0016.87	Hsap_XP_005270743.1	615463	OG0001246	1	TRUE	Hsap_XP_005270743.1
HyS0016.9	Hsap_XP_005260739.1	604808	OG0009919
HyS0016.90	Hsap_XP_011521155.1	613190	OG0005234	1	TRUE	Hsap_XP_011521155.1
HyS0016.91	Hsap_NP_055887.3	612268	OG0000126	1	TRUE	Hsap_NP_055887.3
HyS0016.94			OG0000165	4		Hsap_NP_001230937.1	Hsap_NP_006603.2	Hsap_NP_055690.1	Hsap_NP_055889.2
HyS0016.96			OG0000255	4		Hsap_NP_000278.3	Hsap_NP_000457.1	Hsap_NP_009057.1	Hsap_XP_016863314.1
HyS0016.97	Hsap_NP_001274353.1	116897	OG0001887	2	TRUE	Hsap_NP_001274353.1	Hsap_NP_001796.2
HyS0017.10			OG0002504	1		Hsap_XP_024307475.1
HyS0017.101	Hsap_NP_057062.1	613932	OG0005376
HyS0017.102	Hsap_NP_000223.1	600900	OG0006980	1	TRUE	Hsap_NP_000223.1
HyS0017.103			OG0000644	1		Hsap_NP_000048.1
HyS0017.11	Hsap_NP_740754.1	604896	OG0007003	1	TRUE	Hsap_NP_740754.1
HyS0017.110	Hsap_NP_115497.4	300715	OG0003552	2	TRUE	Hsap_NP_006756.2	Hsap_NP_115497.4
HyS0017.111	Hsap_XP_005263495.1	601231	OG0001598	1	TRUE	Hsap_XP_005263495.1
HyS0017.112			OG0000047	10		Hsap_NP_001003841.1	Hsap_NP_001010898.1	Hsap_NP_001035.1	Hsap_NP_001036.1	Hsap_NP_004202.3	Hsap_NP_005620.1	Hsap_NP_064593.1	Hsap_NP_964012.2	Hsap_XP_005265468.1	Hsap_XP_011521597.1
[truncated: 3,561 more rows]

[truncated: 5 more sheets: X.7_OMIM_In_Echinata, X.8_CAFÉ_Results_PerNode, X.9_LineageSpecific_CAFE_Change, X.10_Hsym_Full_Orthology_CAFE, X.11_Hech_Full_Orthology_CAFE]
