# Supplementary material for: The genome of the colonial hydroid Hydractinia reveals that their stem cells use a toolkit of evolutionarily shared genes with all animals
Source: Genome Res. 2024 Mar;34(3):498–513. doi: 10.1101/gr.278382.123 (PMC11067881; doi:10.1101/gr.278382.123)
Supplement: Supplement 4 [file Supplemental_Table_S18.xlsx]

## Sheet: miRNA predictions
miRNA high quality predictions - note that only 38 mature sequences are unique (duplicates are highlighted in yellow)
Name	miRDeep2 score	Mature reads	Loop reads	Star reads	Mature read sequence	Top Blast Hit	Converted mature read sequence
c224903624.Contig1_4368	132136	259172	0	6	uaacucucuucacaaaaggc		taactctcttcacaaaaggc
c218203080.Contig1_5551	53378.8	97317	0	7375	uugcuaguugcuuuugucccca	hma-mir-2022	ttgctagttgcttttgtcccca
c218203080.Contig1_5553	49698.7	97317	0	157	uugcuaguugcuuuugucccca	hma-mir-2022	ttgctagttgcttttgtcccca
c205802282.Contig1_31867	5574.2	10904	0	28	auuccuaaaaauaauucgucu		attcctaaaaataattcgtct
c209402768.Contig1_17342	1606.7	2770	0	391	ucuuccaaucugaucuagac		tcttccaatctgatctagac
c205002648.Contig1_3517	1356.9	2628	0	33	uuuuuagcccgcggauuucu	nve-mir-2025	tttttagcccgcggatttct
c223704160.Contig1_26842	741	1328	0	123	aacugugcucguacccccaugu		aactgtgctcgtacccccatgt
c206103017.Contig1_3319	739.7	1328	0	121	aacugugcucguacccccaugu		aactgtgctcgtacccccatgt
c277402471.Contig1_38989	715.8	1328	0	74	aacugugcucguacccccaugu		aactgtgctcgtacccccatgt
c212602482.Contig1_10298	711.2	1319	0	74	aacugugcucguacccccaugu		aactgtgctcgtacccccatgt
c211502472.Contig1_25545	572.3	1018	0	95	augggggugugagcaaaguuuu		atgggggtgtgagcaaagtttt
c212002664.Contig1_9261	539.5	1060	0	2	auacuacaggguuauaagcu		atactacagggttataagct
c219403065.Contig1_4069	522.4	1007	0	20	uaacuuuuucuugaccguauga		taactttttcttgaccgtatga
c253302521.Contig1_30889	486.5	791	0	157	ugugcgauacaaaguuuaugc		tgtgcgatacaaagtttatgc
c243202716.Contig1_31013	486.4	791	0	157	ugugcgauacaaaguuuaugc		tgtgcgatacaaagtttatgc
c226103503.Contig1_29759	486.4	791	0	157	ugugcgauacaaaguuuaugc		tgtgcgatacaaagtttatgc
c207602871.Contig1_16302	486	791	0	157	ugugcgauacaaaguuuaugc		tgtgcgatacaaagtttatgc
c210702395.Contig1_6921	225.9	357	0	86	uauucugcaucauuuauccuau		tattctgcatcatttatcctat
c219803047.Contig1_3741	162	203	0	111	uguagaauaauagguccaaua		tgtagaataataggtccaata
c210202393.Contig1_887	161.7	203	0	111	uguagaauaauagguccaaua		tgtagaataataggtccaata
c204102429.Contig1_21365	159	249	0	55	uaccuuucuuggccacuuuag		tacctttcttggccactttag
c243002923.Contig1_33697	101.6	97	0	93	auggggguacgaggacauuuu		atgggggtacgaggacatttt
c227203349.Contig1_28886	92.2	157	0	19	aaagacucuuuguugcauuga		aaagactctttgttgcattga
c211602788.Contig1_29601	85.3	65	0	93	auggagguacgaggacaguuu		atggaggtacgaggacagttt
c227203058.Contig1_16344	80	145	1	2	uuauauuuuguguggacuaauu		ttatattttgtgtggactaatt
c226803362.Contig1_12740	70.4	69	0	68	ucgaccccagagcucuuugg		tcgaccccagagctctttgg
c201402758.Contig1_13164	61.6	112	0	2	uuuggcugguggauugacuguc		tttggctggtggattgactgtc
c214903135.Contig1_4399	50.5	46	0	73	ugguuccauucugaugcuaua		tggttccattctgatgctata
c248002876.Contig1_31172	48.8	96	0	1	cugguagugaugugcaugcugu		ctggtagtgatgtgcatgctgt
c205802287.Contig1_22280	36.4	47	0	19	ucagagauagaaaacuguauu		tcagagatagaaaactgtatt
c201802553.Contig1_18570	27.2	44	0	1	uuacagaguaacaucgucagg		ttacagagtaacatcgtcagg
c206602750.Contig1_29194	25.1	34	1	12	uacacgaggcggaaaauguc		tacacgaggcggaaaatgtc
c204402348.Contig1_27219	12.8	39	0	8	uugaagauuuccgucauuugc		ttgaagatttccgtcatttgc
c210702187.Contig1_15469	11.6	25	0	6	uauucugcaauaguuauccuau		tattctgcaatagttatcctat
c209402768.Contig1_17339	11.1	16	0	5	aaaacaugauuugacacaaaca		aaaacatgatttgacacaaaca
c200703424.Contig1_8346	8.6	26	4	7	uucggcucuugauugaaagc		ttcggctcttgattgaaagc
c214002699.Contig1_16330	7.5	14	0	1	auccuacucgcagcacca		atcctactcgcagcacca
c221203877.Contig1_11065	6.6	19	1	1	uuuagcggauggugucaaug		tttagcggatggtgtcaatg
c211002691.Contig1_4984	5.9	3279	0	0	uaucaaaacgacaaaaaacccu		tatcaaaacgacaaaaaaccct
c200403032.Contig1_13237	5.9	3731	0	0	uaucaaaaauacaaaaaacccu		tatcaaaaatacaaaaaaccct
c204802722.Contig1_41601	5.8	3731	0	0	uaucaaaaauacaaaaaacccu		tatcaaaaatacaaaaaaccct
c221804480.Contig1_15554	5.8	128	0	0	ucaaaaggacaaaaaaccuu		tcaaaaggacaaaaaacctt
c276504284.Contig1_19242	5.8	87	0	0	uuucauguauguaacuuucc		tttcatgtatgtaactttcc
c202302250.Contig1_4298	5.7	75	0	0	uaaaugaguggcaguaaagcu		taaatgagtggcagtaaagct
c203102319.Contig1_5581	5.6	1912	0	647	aagagcucuggggacgagaau		aagagctctggggacgagaat
c207702194.Contig1_16162	5.6	9531	0	0	uauccuuuucggcacuugccc		tatccttttcggcacttgccc
c201203490.Contig1_10452	5.5	1907	0	78	aagagcucuggggacgagaau		aagagctctggggacgagaat
c217302693.Contig1_6069	5.5	257679	0	978	uagcauaacauuguaagaag	hma-miR-2030	tagcataacattgtaagaag

## Sheet: Legend
Table S18. List of 38 unique high quality mature miRNA sequences from H. echinata. Duplicates highlighted in yellow.
