# Supplementary material for: The genome of the colonial hydroid Hydractinia reveals that their stem cells use a toolkit of evolutionarily shared genes with all animals
Source: Genome Res. 2024 Mar;34(3):498–513. doi: 10.1101/gr.278382.123 (PMC11067881; doi:10.1101/gr.278382.123)
Supplement: Supplement 5 [file Supplemental_Table_S27.xlsx]

## Sheet: Legend
Table S27. Classification and annotation for all H. echinata and H. symbiolongicarpus homeobox proteins including final class assignment, orthogroup ID, PANNZER2 annotations, and nr best BLAST hits. A pairwise alignment matrix of all H. echinata and H. symbiolongicarpus homeodomains is included in a separate tab.

## Sheet: Hech_Hbox_ScaffoldOrdered
SeqName	Bayes	ML	Secondary domain(s)	Final class assignment	orthogroup_id	pannzer_description	pannzer_gene_name	molecular_function	biological_processes	cellular_component	best_BLAST_hit	eval
HyE0001.295	prd	prd		PRD	OG0000038	Homeobox protein unc-4	NA	sequence-specific DNA binding	regulation of transcription, DNA-templated	nucleus	ALJ33549.1 Unc, partial [Clytia hemisphaerica]	3.3e-28
HyE0001.5	cers	cers	TLC	CERS	OG0000700	Ceramide synthetase	NA	DNA binding	ceramide biosynthetic process	nucleus	XP_004209901.2 PREDICTED: ceramide synthase 6-like [Hydra vulgaris]	2.2e-100
HyE0002.92	prd	prd		PRD	OG0000038	Homeobox transcription factor Orthopedia	NA	sequence-specific DNA binding	multicellular organism development	nucleus	CEG06179.1 homeobox transcription factor Orthopedia [Clytia hemisphaerica]	3.9e-58
HyE0005.259	tale	tale	MEIS	TALE	OG0000254	Homeobox protein pknox	PKNOX2	actin monomer binding	regulation of transcription, DNA-templated	nucleus	XP_018408062.1 PREDICTED: homeobox protein PKNOX2 isoform X1 [Nanorana parkeri]	1.1e-64
HyE0005.46	prd	prd		PRD	OG0000038	Homeobox protein prophet of Pit-1 (inferred by orthology to a human protein)	NA	sequence-specific DNA binding	regulation of transcription, DNA-templated	nucleus	CAA75669.1 prdl-b protein, partial [Hydra vulgaris]	1.1e-25
HyE0006.148	uncl	uncl (hdx)		UNCL	OG0012876	NA	NA	NA	NA	NA	XP_019631208.1 PREDICTED: nuclear receptor corepressor 1-like, partial [Branchiostoma belcheri]	0.0002
HyE0007.103	prd	prd		PRD	OG0000038	Homeobox protein Otx	NA	sequence-specific DNA binding	multicellular organism development	nucleus	XP_002157088.1 PREDICTED: homeobox protein OTX2-like [Hydra vulgaris]	2.5e-74
HyE0008.252	tale	tale		TALE	OG0000254	Homeobox protein caupolican	NA	sequence-specific DNA binding	regulation of transcription, DNA-templated	nucleus	XP_002166749.1 PREDICTED: iroquois-class homeodomain protein IRX-2-like [Hydra vulgaris]	5.2e-86
HyE0011.129	antp	antp		ANTP	OG0000008	Homeodomain transcription factor protein GSX	NA	sequence-specific DNA binding	regulation of transcription, DNA-templated	nucleus	ABC00746.1 Cnox-2 [Hydractinia symbiolongicarpus]	1.2e-133
HyE0011.177	antp	antp		ANTP	OG0000008	Homeodomain transcription factor	NA	sequence-specific DNA binding	regulation of transcription, DNA-templated	nucleus	ACM62733.1 Hox9-14A homeodomain transcription factor protein [Clytia hemisphaerica]	1.9e-29
HyE0013.109	prd	uncl (hnf?)	VWA	UNCL	OG0000400	Homeobox domain-containing protein (Fragment)	NA	sequence-specific DNA binding	regulation of transcription, DNA-templated	nucleus	XP_012558818.1 PREDICTED: voltage-dependent calcium channel subunit alpha-2/delta-4-like isoform X1 [Hydra vulgaris]	3.2e-193
HyE0014.152	antp	antp		ANTP	OG0000008	Ventral nervous system defective transcription factor	NA	sequence-specific DNA binding	regulation of cardiac conduction	nucleus	NP_001296702.1 homeobox protein Hox-C3a-like [Hydra vulgaris]	1.5e-55
HyE0015.222	antp	antp		ANTP	OG0000008	Homeodomain transcription factor	NA	sequence-specific DNA binding	regulation of transcription, DNA-templated	nucleus	ACM62735.1 Hox9-14C homeodomain transcription factor protein [Clytia hemisphaerica]	1.6e-67
HyE0017.2	antp	antp		ANTP	OG0000008	Homeobox transcription factor Gorget	NA	DNA binding	regulation of transcription, DNA-templated	nucleus	XP_002165751.1 PREDICTED: homeobox protein ceh-9-like [Hydra vulgaris]	9.8e-18
HyE0018.78	antp	antp		ANTP	OG0000008	Homeobox protein ceh-23 (inferred by orthology to a C. elegans protein)	NA	sequence-specific DNA binding	regulation of transcription, DNA-templated	nucleus	ABD46736.1 homeobox protein abdominalA, partial [Nymphon gracile]	5.8e-07
HyE0019.68	pou	pou	POU	POU	OG0000421	POU domain, class 4, transcription factor 1	POU4F3	sequence-specific DNA binding	animal organ development	nucleus	XP_004205460.2 PREDICTED: POU domain, class 4, transcription factor 2-like isoform X1 [Hydra vulgaris]	8.3e-129
HyE0019.69	pou	pou	POU, DNApol	POU	OG0000743	DNA polymerase theta	POLQ	DNA-directed DNA polymerase activity	DNA-dependent DNA replication	nucleus	XP_012557615.1 PREDICTED: DNA polymerase theta-like isoform X1 [Hydra vulgaris]	0
HyE0019.93	uncl	uncl		UNCL	OG0000038	Homeobox transcription factor Rx1	NA	sequence-specific DNA binding	regulation of transcription, DNA-templated	nucleus	XP_004207550.1 PREDICTED: short stature homeobox protein 2-like [Hydra vulgaris]	8.5e-25
HyE0021.163	prd	prd		PRD	OG0000038	Homeodomain protein Otx	NA	sequence-specific DNA binding	multicellular organism development	nucleus	AAF04002.1 homeodomain protein Otx [Podocoryna carnea]	4.2e-94
HyE0022.125	antp	antp		ANTP	OG0030895	T cell leukemia homeobox 2	NA	sequence-specific DNA binding	regulation of transcription, DNA-templated	nucleus	ACM62730.1 Antp family homeodomain transcription factor protein HD01 [Clytia hemisphaerica]	5.3e-17
HyE0023.57	prd	prd		PRD	OG0000038	Homeobox protein goosecoid	NA	sequence-specific DNA binding	regulation of transcription, DNA-templated	nucleus	ALJ33547.1 Prdl-e, partial [Clytia hemisphaerica]	2.6e-32
HyE0025.16	lim	lim	LIM	LIM	OG0000157	LIM/homeobox protein Awh	NA	DNA binding	neuron differentiation	nucleus	BAQ19162.1 Lhx6/8 LIM homeobox protein, partial [Cladonema pacificum]	1.7e-59
HyE0026.173	antp	antp		ANTP	OG0000008	Transcription factor Dll	DLX6A	sequence-specific DNA binding	medial fin morphogenesis	nucleus	ACM62726.1 Dll1 distalless homeodomain protein [Clytia hemisphaerica]	4.3e-53
HyE0026.67	antp	antp		ANTP	OG0000008	Transcription factor Dll	NA	sequence-specific DNA binding	regulation of transcription, DNA-templated	nucleus	XP_016131759.1 PREDICTED: homeobox protein Dlx1a-like [Sinocyclocheilus grahami]	4e-23
HyE0028.10	antp	antp		ANTP	OG0000008	Hematopoietically-expressed homeobox protein HHEX	HHEX	sequence-specific DNA binding	regulation of transcription, DNA-templated	nucleus	XP_004209529.2 PREDICTED: homeobox protein MSH-C-like [Hydra vulgaris]	9.3e-23
HyE0028.134	antp	antp		ANTP	OG0000008	Homeobox transcription factor SOHo	NA	sequence-specific DNA binding	regulation of transcription, DNA-templated	nucleus	XP_007889718.1 PREDICTED: homeobox protein HMX1 [Callorhinchus milii]	9.4e-20
HyE0028.62	antp	antp		ANTP	OG0000008	Homeobox protein deformed	NA	sequence-specific DNA binding	multicellular organism development	nucleus	AAK63185.1 transcription factor Cnox4-Pc [Podocoryna carnea]	3.4e-120
HyE0028.77	cers	cers		CERS	OG0000700	NA	NA	NA	NA	NA	XP_004211940.2 PREDICTED: uncharacterized protein LOC101237792, partial [Hydra vulgaris]	3.8e-26
HyE0044.141	prd	prd		PRD	OG0000038	Aristaless homeodomain transcription factor	NA	sequence-specific DNA binding	regulation of transcription, DNA-templated	nucleus	XP_004208605.2 PREDICTED: visual system homeobox 2-like [Hydra vulgaris]	4.9e-33
HyE0044.55	tale	tale	MEIS	TALE	OG0000254	TALE class homeobox transcription factor Meis	MEIS1	DNA binding	regulation of transcription, DNA-templated	nucleus	XP_012557009.1 PREDICTED: homeobox protein Meis1-like [Hydra vulgaris]	5.2e-117
HyE0047.28	lim	lim	LIM, LIM	LIM	OG0000157	LIM homeobox transcription factor 1-alpha	NA	sequence-specific DNA binding	regulation of transcription, DNA-templated	nucleus	PIK41904.1 putative LIM homeobox transcription factor 1-beta isoform X3, partial [Apostichopus japonicus]	1.2e-60
HyE0050.108	prd	prd		PRD	OG0000038	Homeobox domain-containing protein (Fragment)	NA	sequence-specific DNA binding	regulation of transcription, DNA-templated	nucleus	ALJ33539.1 Prdl-d, partial [Clytia hemisphaerica]	2.6e-36
HyE0051.123	tale	uncl (zf)	SIX	SINE*	OG0000546	Sine oculis-like transcription factor	NA	sequence-specific DNA binding	regulation of transcription, DNA-templated	nucleus	AEP44002.1 sine oculis-like transcription factor [Craspedacusta sowerbii]	4e-56
HyE0061.32	antp	antp		ANTP	OG0000008	Homeobox domain-containing protein (Fragment)	NA	sequence-specific DNA binding	regulation of transcription, DNA-templated	nucleus	CAA72534.1 Cn-ems protein [Hydractinia symbiolongicarpus]	4.2e-135
HyE0062.120	pou	pou	POU	POU	OG0000421	POU domain protein 1	NA	sequence-specific DNA binding	brain development	nucleus	AEG66930.1 POU domian transcription factor Polynem, partial [Hydractinia echinata]	1.7e-227
HyE0066.22	antp	antp		ANTP	OG0000008	Homeobox protein Nkx-2.4	NA	sequence-specific DNA binding	regulation of transcription, DNA-templated	nucleus	ACM62740.1 NK2d homeodomain transcription factor protein [Clytia hemisphaerica]	3.4e-27
HyE0070.68	antp	antp		ANTP	OG0000008	HLXf-ANTP class homeobox protein (Fragment)	NA	sequence-specific DNA binding	regulation of transcription, DNA-templated	nucleus	XP_018426931.1 PREDICTED: homeobox protein Nkx-6.3 [Nanorana parkeri]	9.2e-19
HyE0072.35	uncl	uncl (zf)		UNCL	OG0018691	Homeobox domain-containing protein (Fragment)	NA	sequence-specific DNA binding	regulation of transcription, DNA-templated	nucleus	XP_011438560.1 PREDICTED: POU domain, class 6, transcription factor 1 isoform X1 [Crassostrea gigas]	5.1e-06
HyE0076.62	sine	sine	SIX	SINE	OG0000546	SIX class homeodomain transcription factor	SIX2	sequence-specific DNA binding	regulation of transcription, DNA-templated	nucleus	XP_020911891.1 homeobox protein six1a-like [Exaiptasia pallida]	4.1e-50
HyE0077.55	antp	antp		ANTP	OG0000008	Muscle segmentation homeobox	NA	sequence-specific DNA binding	regulation of transcription, DNA-templated	nucleus	AAX58756.1 homeodomain protein Msx [Podocoryna carnea]	6.6e-49
HyE0078.71	prd	prd		PRD	OG0000038	Orthodenticle homolog Otxa	NA	sequence-specific DNA binding	regulation of transcription, DNA-templated	nucleus	ALJ33546.1 Otx-related-1 [Clytia hemisphaerica]	2.9e-19
HyE0080.51	lim	lim	LIM, LIM	LIM	OG0000157	LIM homeobox 5	NA	sequence-specific DNA binding	regulation of transcription, DNA-templated	nucleus	XP_018412287.1 PREDICTED: LIM/homeobox protein Lhx1 isoform X1 [Nanorana parkeri]	6.3e-69
HyE0082.29	sine	sine	UAA, SIX	SINE	OG0001401	Adenosine 3'-phospho 5'-phosphosulfate transporter 1	SLC35B2	3'-phosphoadenosine 5'-phosphosulfate transmembrane transporter activity	3'-phosphoadenosine 5'-phosphosulfate transport	Golgi apparatus	XP_012561169.1 PREDICTED: adenosine 3'-phospho 5'-phosphosulfate transporter 1-like [Hydra vulgaris]	1.2e-113
HyE0084.29	uncl	uncl		UNCL	OG0000038	NA	NA	NA	NA	NA	XP_016138818.1 PREDICTED: homeobox protein NOBOX-like isoform X1 [Sinocyclocheilus grahami]	0.00013
HyE0085.29	antp	antp		ANTP	OG0000008	Homeobox domain-containing protein (Fragment)	NA	sequence-specific DNA binding	regulation of transcription, DNA-templated	nucleus	XP_010868231.1 PREDICTED: homeobox protein HMX3 [Esox lucius]	5.3e-15
HyE0087.72	prd	uncl (hopx/zf)		UNCL	OG0012719	NA	NA	NA	NA	NA	XP_028397534.1 pituitary homeobox homolog Ptx1-like [Dendronephthya gigantea]	3.8e-09
HyE0088.53	pou	uncl (zf)	DFP, POU	POU	OG0004603	Phosphopantothenoylcysteine synthetase	PPCS	ligase activity	regulation of transcription, DNA-templated	nucleus	XP_012564262.1 PREDICTED: uncharacterized protein LOC100198319 [Hydra vulgaris]	2e-269
HyE0094.36	prd	prd	PAX	PRD	OG0000371	Paired and homeobox transcription factor	PAX5	DNA binding	multicellular organism development	nucleus	CAB61522.1 paired box protein [Podocoryna carnea]	4.1e-264
HyE0094.65	prd	prd	PAX	PRD	OG0000371	Homeodomain transcription factor PaxA	NA	sequence-specific DNA binding	multicellular organism development	nucleus	ALJ33551.1 PaxC, partial [Clytia hemisphaerica]	3.4e-51
HyE0109.89	antp	antp		ANTP	OG0000008	Homeobox domain-containing protein (Fragment)	NA	sequence-specific DNA binding	regulation of transcription, DNA-templated	nucleus	ACM62740.1 NK2d homeodomain transcription factor protein [Clytia hemisphaerica]	1.4e-15
HyE0110.24	antp	antp		ANTP	OG0000008	Homeobox protein MOX-2	NA	sequence-specific DNA binding	regulation of transcription, DNA-templated	nucleus	ACM62736.1 Mox homeodomain transcription factor protein [Clytia hemisphaerica]	2e-34
HyE0111.20	antp	antp		ANTP	OG0000008	Posterior neuron-specific homeobox	NA	sequence-specific DNA binding	regulation of transcription, DNA-templated	nucleus	XP_010868231.1 PREDICTED: homeobox protein HMX3 [Esox lucius]	2.8e-16
HyE0113.43	tale	tale	ribosomal, PBC	TALE	OG0001249	Pre-B-cell leukemia transcription factor	NA	sequence-specific DNA binding	regulation of transcription, DNA-templated	nucleus	XP_012563776.1 PREDICTED: pre-B-cell leukemia transcription factor 1-like [Hydra vulgaris]	9.5e-118
HyE0113.57	antp	antp		ANTP	OG0000008	Homeo domain transcription factor Not	NA	sequence-specific DNA binding	regulation of transcription, DNA-templated	nucleus	CAB88387.1 homeoprotein [Hydra vulgaris]	8.9e-18
HyE0117.9	prd	prd		PRD	OG0000038	retinal homeobox protein Rax	NA	sequence-specific DNA binding	regulation of transcription, DNA-templated	nucleus	ALJ33542.1 Rx [Clytia hemisphaerica]	5.5e-41
HyE0122.10	uncl	uncl		UNCL	OG0000008	NA	NA	NA	NA	NA	XP_020626848.1 brain-specific homeobox protein homolog [Orbicella faveolata]	3.7e-08
HyE0122.60	prd	prd		PRD	OG0000038	Homeobox domain-containing protein (Fragment)	NA	sequence-specific DNA binding	regulation of transcription, DNA-templated	nucleus	XP_012566844.1 PREDICTED: short stature homeobox protein-like [Hydra vulgaris]	2.5e-30
HyE0137.39	sine	sine	SIX	SINE	OG0000546	Sine oculis homeobox 6	SIX6	DNA-binding transcription factor activity, RNA polymerase II-specific	eye development	nucleus	AAT11872.1 sine oculis-like transcription factor Six3/6 [Podocoryna carnea]	1.8e-96
HyE0137.41	prd	prd	ion_trans	PRD	OG0000292	Homeobox protein goosecoid	GSC	sequence-specific DNA binding	regulation of transcription, DNA-templated	nucleus	AWJ68254.1 putative voltage-dependent calcium channel 2 [Hirudo verbana]	7.1e-170
HyE0137.52	antp	antp		ANTP	OG0000008	Homeobox domain-containing protein (Fragment)	NA	DNA binding	regulation of transcription, DNA-templated	nucleus	XP_020628321.1 homeobox protein BarH-like 1 [Orbicella faveolata]	1.1e-28
HyE0212.25	prd	prd		PRD	OG0000038	Pituitary homeobox transcript variant 2	NA	sequence-specific DNA binding	regulation of transcription, DNA-templated	nucleus	XP_002164986.2 PREDICTED: pituitary homeobox 1-like [Hydra vulgaris]	4e-71
HyE0213.38	antp	antp		ANTP	OG0000008	Homeobox domain-containing protein (Fragment)	NA	sequence-specific DNA binding	regulation of transcription, DNA-templated	nucleus	ABE68631.1 Cnox-4 [Eleutheria dichotoma]	1.7e-43
HyE0247.11	sine	sine	SIX	SINE	OG0000546	Homeobox domain-containing protein (Fragment)	NA	sequence-specific DNA binding	regulation of transcription, DNA-templated	nucleus	AEP44001.1 sine oculis-like transcription factor Six4/5B [Craspedacusta sowerbii]	1e-100
HyE0352.10	uncl	uncl		UNCL	OG0031580	NA	NA	NA	NA	NA	XP_016138818.1 PREDICTED: homeobox protein NOBOX-like isoform X1 [Sinocyclocheilus grahami]	0.00038
HyE0367.3	prd	prd		PRD	OG0000038	Homeobox protein aristaless	NA	sequence-specific DNA binding	regulation of transcription, DNA-templated	nucleus	XP_002160816.1 PREDICTED: homeobox protein aristaless-like isoform X1 [Hydra vulgaris]	1.2e-46
HyE0478.8	lim	lim		LIM	OG0000038	Homeobox domain-containing protein (Fragment)	NA	sequence-specific DNA binding	regulation of transcription, DNA-templated	nucleus	XP_023325954.1 LIM/homeobox protein Lhx5-like [Eurytemora affinis]	4.8e-24
HyE0478.9	lim	lim	LIM, LIM	LIM	OG0000157	LIM homeobox 5	NA	sequence-specific DNA binding	regulation of transcription, DNA-templated	nucleus	XP_018412287.1 PREDICTED: LIM/homeobox protein Lhx1 isoform X1 [Nanorana parkeri]	1.1e-68
HyE0518.1	antp	antp		ANTP	OG0000008	Homeobox Nkx	NA	sequence-specific DNA binding	regulation of transcription, DNA-templated	nucleus	ACM62740.1 NK2d homeodomain transcription factor protein [Clytia hemisphaerica]	2.1e-26
HyE1000.1	uncl	uncl		UNCL	OG0012876	NA	NA	NA	NA	NA	NA	NA
HyE1111.3	prd	prd		PRD	OG0000038	Homeobox protein unc-4	NA	sequence-specific DNA binding	regulation of transcription, DNA-templated	nucleus	ALJ33549.1 Unc, partial [Clytia hemisphaerica]	3.3e-28
HyE1498.4	prd	prd		PRD	OG0000038	Homeodomain protein Otx	NA	sequence-specific DNA binding	multicellular organism development	nucleus	XP_002157088.1 PREDICTED: homeobox protein OTX2-like [Hydra vulgaris]	9.3e-74
HyE1684.2	prd	prd		PRD	OG0000038	Homeodomain protein Otx	NA	sequence-specific DNA binding	multicellular organism development	nucleus	AAF04002.1 homeodomain protein Otx [Podocoryna carnea]	4.2e-94
HyE1836.3	uncl	uncl		UNCL	OG0012876	NA	NA	NA	NA	NA	NA	NA
HyE1933.2	antp	antp		ANTP	OG0000008	Transcription factor Dll	NA	sequence-specific DNA binding	regulation of transcription, DNA-templated	nucleus	XP_016131759.1 PREDICTED: homeobox protein Dlx1a-like [Sinocyclocheilus grahami]	4e-23
HyE2527.2	lim	lim	LIM	LIM	OG0000157	LIM homeobox transcription factor 1-alpha	NA	sequence-specific DNA binding	regulation of transcription, DNA-templated	nucleus	XP_012269041.1 LIM homeobox transcription factor 1-beta [Athalia rosae]	1.8e-40
HyE2966.2	cers	cers	TLC	CERS	OG0000700	Ceramide synthase 6	CERS5	DNA binding	ceramide biosynthetic process	nucleus	XP_004209901.2 PREDICTED: ceramide synthase 6-like [Hydra vulgaris]	5.9e-104
HyE3240.1	prd	prd		PRD	OG0000038	Pituitary homeobox transcript variant 2	NA	sequence-specific DNA binding	regulation of transcription, DNA-templated	nucleus	XP_002164986.2 PREDICTED: pituitary homeobox 1-like [Hydra vulgaris]	4e-71
HyE3613.3	uncl	uncl		UNCL	OG0000038	Homeobox transcription factor Rx1	NA	sequence-specific DNA binding	regulation of transcription, DNA-templated	nucleus	XP_004207550.1 PREDICTED: short stature homeobox protein 2-like [Hydra vulgaris]	7.6e-27
HyE3813.2	pou	pou	POU	POU	OG0000421	POU domain protein 1	NA	sequence-specific DNA binding	brain development	nucleus	AEG66930.1 POU domian transcription factor Polynem, partial [Hydractinia echinata]	9.9e-236
HyE3863.1	antp	antp	cupin_b	ANTP	OG0001960	Homeobox transcription factor Gorget	NA	DNA binding	regulation of transcription, DNA-templated	nucleus	XP_002161389.3 PREDICTED: lysine-specific demethylase 8-like [Hydra vulgaris]	6.8e-81
HyE4150.1	prd	prd	PAX	PRD	OG0000371	Paired and homeobox transcription factor	PAX5	DNA binding	multicellular organism development	nucleus	CAB61522.1 paired box protein [Podocoryna carnea]	4.1e-264
HyE4586.1	sine	sine	UAA, SIX	SINE	OG0000546	SIX class homeobox transcription factor SIX41	SIX1	transcription regulatory region sequence-specific DNA binding	positive regulation of mesenchymal cell proliferation involved in ureter development	nucleus	AAT11873.1 sine oculis-like transcription factor Six1/2 [Cladonema radiatum]	3.5e-71

## Sheet: Hsym_Hbox_ScaffoldOrdered
SeqName	Bayes	ML	Secondary Domain(s)	Final class assignment	orthogroup_id	pannzer_description	pannzer_gene_name	molecular_function	biological_processes	cellular_component	best_BLAST_hit	eval
HyS0001.518	tale	tale	MEIS	TALE	OG0000254	Homeobox protein pknox	PKNOX2	actin monomer binding	regulation of transcription, DNA-templated	nucleus	XP_018408062.1 PREDICTED: homeobox protein PKNOX2 isoform X1 [Nanorana parkeri]	2.4e-64
HyS0002.33	tale	tale		TALE	OG0000254	Homeobox protein caupolican	NA	sequence-specific DNA binding	regulation of transcription, DNA-templated	nucleus	XP_002166749.1 PREDICTED: iroquois-class homeodomain protein IRX-2-like [Hydra vulgaris]	1.2e-87
HyS0003.228	sine	sine	SIX	SINE	OG0000546	Homeobox domain-containing protein (Fragment)	SIX1	transcription regulatory region sequence-specific DNA binding	positive regulation of mesenchymal cell proliferation involved in ureter development	nucleus	AAT11873.1 sine oculis-like transcription factor Six1/2 [Cladonema radiatum]	8.5e-83
HyS0004.167	antp	antp		ANTP	OG0000008	Transcription factor Dll	DLX6A	sequence-specific DNA binding	medial fin morphogenesis	nucleus	ACM62726.1 Dll1 distalless homeodomain protein [Clytia hemisphaerica]	2.1e-52
HyS0004.298	prd	prd		PRD	OG0000038	Homeobox domain-containing protein (Fragment)	NA	sequence-specific DNA binding	regulation of transcription, DNA-templated	nucleus	XP_012566844.1 PREDICTED: short stature homeobox protein-like [Hydra vulgaris]	3.3e-30
HyS0004.342	uncl	uncl		UNC	OG0000008	NA	NA	NA	NA	NA	XP_002610877.1 hypothetical protein BRAFLDRAFT_94870 [Branchiostoma floridae]	1.4e-07
HyS0004.350	antp	antp		ANTP	OG0000008	Homeobox transcription factor Gorget	NA	sequence-specific DNA binding	regulation of transcription, DNA-templated	nucleus	XP_002165751.1 PREDICTED: homeobox protein ceh-9-like [Hydra vulgaris]	1.8e-19
HyS0004.62	antp	antp		ANTP	OG0000008	Transcription factor Dll	NA	sequence-specific DNA binding	regulation of transcription, DNA-templated	nucleus	XP_016131759.1 PREDICTED: homeobox protein Dlx1a-like [Sinocyclocheilus grahami]	3.1e-23
HyS0005.209	antp	antp		ANTP	OG0000008	Homeodomain transcription factor	NA	sequence-specific DNA binding	regulation of transcription, DNA-templated	nucleus	ACM62733.1 Hox9-14A homeodomain transcription factor protein [Clytia hemisphaerica]	3.7e-30
HyS0005.246	antp	antp		ANTP	OG0000008	Homeodomain transcription factor protein GSX	NA	sequence-specific DNA binding	regulation of transcription, DNA-templated	nucleus	ABC00746.1 Cnox-2 [Hydractinia symbiolongicarpus]	4.1e-125
HyS0007.198	prd	prd	WD40, adh_short	PRD	OG0000775	Homeobox transcription factor Orthopedia	NA	sequence-specific DNA binding	multicellular organism development	nucleus	XP_002159271.1 PREDICTED: methylosome protein 50-like [Hydra vulgaris]	5e-77
HyS0008.328	pou	pou	DFP, POU	POU	OG0004603	Phosphopantothenoylcysteine synthetase	PPCS	ligase activity	regulation of transcription, DNA-templated	nucleus	ABU92523.1 POU class 6 [Eleutheria dichotoma]	1.2e-269
HyS0009.110	prd	prd		POU	OG0000038	homeobox protein NOBOX	NA	sequence-specific DNA binding	regulation of transcription, DNA-templated	nucleus	ALJ33539.1 Prdl-d, partial [Clytia hemisphaerica]	3.3e-36
HyS0009.272	lim	lim	LIM, LIM	LIM	OG0000157	LIM homeobox 5	NA	sequence-specific DNA binding	regulation of transcription, DNA-templated	nucleus	XP_018412288.1 PREDICTED: LIM/homeobox protein Lhx1 isoform X2 [Nanorana parkeri]	1e-68
HyS0009.60	antp	antp		ANTP	OG0000008	Homeobox protein slou	NA	sequence-specific DNA binding	regulation of transcription, DNA-templated	nucleus	KRT86122.1 Homeobox domain-containing protein [Oryctes borbonicus]	3.2e-27
HyS0010.23	prd	prd		PRD	OG0000038	Homeobox protein goosecoid	NA	sequence-specific DNA binding	regulation of transcription, DNA-templated	nucleus	ALJ33547.1 Prdl-e, partial [Clytia hemisphaerica]	1.3e-31
HyS0010.323	prd	prd		PRD	OG0000038	Pituitary homeobox transcript variant 2	NA	sequence-specific DNA binding	regulation of transcription, DNA-templated	nucleus	XP_002164986.2 PREDICTED: pituitary homeobox 1-like [Hydra vulgaris]	4e-71
HyS0010.387	prd	prd	PAX	PRD	OG0000371	Homeodomain transcription factor PaxA	NA	sequence-specific DNA binding	multicellular organism development	nucleus	ALJ33551.1 PaxC, partial [Clytia hemisphaerica]	1.7e-53
HyS0010.413	prd	prd	PAX	PRD	OG0000371	Paired and homeobox transcription factor	PAX5	DNA binding	multicellular organism development	nucleus	CAB61522.1 paired box protein [Podocoryna carnea]	2.3e-278
HyS0011.19	antp	antp		ANTP	OG0000008	Homeodomain transcription factor	NA	sequence-specific DNA binding	regulation of transcription, DNA-templated	nucleus	XP_002163407.1 PREDICTED: homeobox protein mab-5-like [Hydra vulgaris]	2.6e-25
HyS0011.24	antp	antp		ANTP	OG0000008	Homeodomain transcription factor	NA	sequence-specific DNA binding	regulation of transcription, DNA-templated	nucleus	ACM62735.1 Hox9-14C homeodomain transcription factor protein [Clytia hemisphaerica]	1.6e-67
HyS0011.252	antp	antp		ANTP	OG0000008	Homeobox protein deformed	NA	sequence-specific DNA binding	multicellular organism development	nucleus	AAK63185.1 transcription factor Cnox4-Pc [Podocoryna carnea]	5.4e-118
HyS0011.313	antp	antp		ANTP	OG0000008	Homeobox transcription factor SOHo	NA	sequence-specific DNA binding	regulation of transcription, DNA-templated	nucleus	XP_007889718.1 PREDICTED: homeobox protein HMX1 [Callorhinchus milii]	1.9e-20
HyS0012.226	antp	antp		ANTP	OG0000008	Posterior neuron-specific homeobox	NA	sequence-specific DNA binding	regulation of transcription, DNA-templated	nucleus	XP_010868231.1 PREDICTED: homeobox protein HMX3 [Esox lucius]	7.9e-17
HyS0015.289	prd	prd		PRD	OG0000038	Homeodomain protein Otx	NA	sequence-specific DNA binding	multicellular organism development	nucleus	AAF04002.1 homeodomain protein Otx [Podocoryna carnea]	3.8e-95
HyS0017.118	prd	prd		PRD	OG0000038	Homeobox protein aristaless	NA	sequence-specific DNA binding	regulation of transcription, DNA-templated	nucleus	XP_002160816.1 PREDICTED: homeobox protein aristaless-like isoform X1 [Hydra vulgaris]	2.2e-46
HyS0017.231	lim	lim		LIM	OG0000157	LIM/homeobox protein Awh	NA	DNA binding	neuron differentiation	nucleus	BAQ19162.1 Lhx6/8 LIM homeobox protein, partial [Cladonema pacificum]	7e-60
HyS0018.218	antp	antp		ANTP	OG0000008	Homeobox protein Nkx-2.4	NA	sequence-specific DNA binding	regulation of transcription, DNA-templated	nucleus	ACM62740.1 NK2d homeodomain transcription factor protein [Clytia hemisphaerica]	2.1e-26
HyS0018.90	antp	antp		ANTP	OG0000008	Homeobox domain-containing protein (Fragment)	NA	sequence-specific DNA binding	regulation of transcription, DNA-templated	nucleus	ABE68631.1 Cnox-4 [Eleutheria dichotoma]	2.2e-39
HyS0019.183	cers	cers	TLC	CERS	OG0000700	Ceramide synthase 6	CERS5	DNA binding	ceramide biosynthetic process	nucleus	XP_004209901.2 PREDICTED: ceramide synthase 6-like [Hydra vulgaris]	6.6e-103
HyS0020.252	hdx	hdx		UNC	OG0012876	NA	NA	NA	NA	NA	PSN49385.1 hypothetical protein C0J52_12220, partial [Blattella germanica]	0.0008
HyS0021.139	uncl	uncl		UNC	OG0000038	Homeobox domain-containing protein (Fragment)	NA	sequence-specific DNA binding	regulation of transcription, DNA-templated	nucleus	XP_016062428.1 PREDICTED: pituitary homeobox 2 [Miniopterus natalensis]	1.1e-09
HyS0022.183	antp	antp		ANTP	OG0000008	Muscle segmentation homeobox	NA	sequence-specific DNA binding	regulation of transcription, DNA-templated	nucleus	AAX58756.1 homeodomain protein Msx [Podocoryna carnea]	7.3e-48
HyS0022.206	sine	sine	Peptidase_M13, SIX	SINE	OG0000072	Endothelin-converting enzyme 1	SIX6	DNA-binding transcription factor activity, RNA polymerase II-specific	eye development	nucleus	XP_002158904.3 PREDICTED: endothelin-converting enzyme 1-like [Hydra vulgaris]	1.3e-248
HyS0022.208	prd	prd		PRD	OG0000038	Homeobox protein goosecoid	GSC	sequence-specific DNA binding	regulation of transcription, DNA-templated	nucleus	ADM21469.1 goosecoid [Hydractinia echinata]	4.1e-148
HyS0022.220	antp	antp	VWA, thyrosinase	ANTP	OG0000720	Tyrosinase	NA	sequence-specific DNA binding	regulation of transcription, DNA-templated	nucleus	XP_028405795.1 uncharacterized protein LOC114528376 [Dendronephthya gigantea]	3.7e-74
HyS0022.92	antp	antp		ANTP	OG0000008	Homeobox Nkx	NA	sequence-specific DNA binding	regulation of transcription, DNA-templated	nucleus	ACM62740.1 NK2d homeodomain transcription factor protein [Clytia hemisphaerica]	6.4e-16
HyS0024.46	antp	antp		ANTP	OG0000008	Hox class homeodomain-containing protein Post2 (Fragment)	NA	sequence-specific DNA binding	regulation of transcription, DNA-templated	nucleus	NA	NA
HyS0025.85	sine	sine	SIX	SINE	OG0000546	Homeobox domain-containing protein (Fragment)	NA	sequence-specific DNA binding	regulation of transcription, DNA-templated	nucleus	AEP44001.1 sine oculis-like transcription factor Six4/5B [Craspedacusta sowerbii]	2.7e-101
HyS0025.95	sine	sine	SIX	SINE	OG0000546	Homeobox domain-containing protein (Fragment)	NA	sequence-specific DNA binding	regulation of transcription, DNA-templated	nucleus	AEP44001.1 sine oculis-like transcription factor Six4/5B [Craspedacusta sowerbii]	2.7e-101
HyS0028.140	prd	prd	CUB, Ig3, Lig_chain	PRD	OG0000083	Homeobox protein orthodenticle	NA	sequence-specific DNA binding	multicellular organism development	nucleus	XP_012566970.1 PREDICTED: uncharacterized protein LOC100206068 [Hydra vulgaris]	4.3e-179
HyS0028.203	prd	prd		PRD	OG0000038	Homeodomain protein Otx	NA	sequence-specific DNA binding	multicellular organism development	nucleus	XP_002157088.1 PREDICTED: homeobox protein OTX2-like [Hydra vulgaris]	2.9e-75
HyS0028.48	uncl	zf		UNC	OG0018691	Homeobox domain-containing protein (Fragment)	NA	sequence-specific DNA binding	regulation of transcription, DNA-templated	nucleus	NP_573555.1 GS homeobox 2 [Mus musculus]	5.1e-06
HyS0032.236	lim	lim	LIM	LIM	OG0000157	Cation-transporting ATPase	NA	sequence-specific DNA binding	regulation of transcription, DNA-templated	nucleus	XP_012269041.1 LIM homeobox transcription factor 1-beta [Athalia rosae]	1.2e-41
HyS0034.123	zf	zf		UNC	OG0000038	DMBXb-paired class homeobox protein (Fragment)	NA	sequence-specific DNA binding	regulation of transcription, DNA-templated	nucleus	XP_004207550.1 PREDICTED: short stature homeobox protein 2-like [Hydra vulgaris]	2.9e-23
HyS0034.96	pou	pou	POU	POU	OG0000421	POU domain, class 4, transcription factor 1	NA	sequence-specific DNA binding	regulation of transcription, DNA-templated	nucleus	XP_004205460.2 PREDICTED: POU domain, class 4, transcription factor 2-like isoform X1 [Hydra vulgaris]	2.7e-127
HyS0035.20	prd	prd		PRD	OG0000038	Retinal homeobox protein Rx-B	NA	sequence-specific DNA binding	regulation of transcription, DNA-templated	nucleus	ALJ33542.1 Rx [Clytia hemisphaerica]	4.7e-40
HyS0038.55	antp	antp		ANTP	OG0030895	NA	NA	NA	NA	NA	ACM62730.1 Antp family homeodomain transcription factor protein HD01 [Clytia hemisphaerica]	1.3e-09
HyS0041.60	antp	antp		ANTP	OG0000008	HLXf-ANTP class homeobox protein (Fragment)	NA	sequence-specific DNA binding	regulation of transcription, DNA-templated	nucleus	XP_003747050.2 PREDICTED: homeobox protein goosecoid [Galendromus occidentalis]	7.2e-19
HyS0046.118	tale	tale	PBC	TALE	OG0001249	Pre-B-cell leukemia transcription factor	NA	sequence-specific DNA binding	regulation of transcription, DNA-templated	nucleus	XP_026096348.1 pre-B-cell leukemia transcription factor 3-like isoform X2 [Carassius auratus]	5.6e-95
HyS0046.123	tale	tale	PBC	TALE	OG0001249	Pre-B-cell leukemia transcription factor	NA	sequence-specific DNA binding	regulation of transcription, DNA-templated	nucleus	XP_012563776.1 PREDICTED: pre-B-cell leukemia transcription factor 1-like [Hydra vulgaris]	3.1e-128
HyS0046.135	antp	antp		ANTP	OG0000008	Homeobox domain-containing protein (Fragment)	NA	sequence-specific DNA binding	regulation of transcription, DNA-templated	nucleus	CAB88387.1 homeoprotein [Hydra vulgaris]	6.8e-18
HyS0046.28	lim	lim	LIM, LIM	LIM	OG0000157	LIM class homeodomain transcription factor, apterous subclass	NA	sequence-specific DNA binding	haltere morphogenesis	nucleus	XP_014243931.2 LIM/homeobox protein Lhx9-like [Cimex lectularius]	7.9e-38
HyS0051.140	prd	prd		PRD	OG0000038	Visual system homeobox 2	NA	sequence-specific DNA binding	regulation of transcription, DNA-templated	nucleus	XP_004208605.2 PREDICTED: visual system homeobox 2-like [Hydra vulgaris]	8.4e-33
HyS0051.77	tale	tale	SAM2, Filamin, Hect, Meis/Pknox	TALE	OG0004287	Ubiquitin-protein ligase	NA	ubiquitin-protein transferase activity	protein ubiquitination	integral component of membrane	XP_012557024.1 PREDICTED: apoptosis-resistant E3 ubiquitin protein ligase 1-like [Hydra vulgaris]	1.4e-239
HyS0053.104	antp	antp		ANTP	OG0000008	Growth arrest homeobox transcription factor GAX	MEOX2	sequence-specific DNA binding	regulation of transcription, DNA-templated	nucleus	ACM62736.1 Mox homeodomain transcription factor protein [Clytia hemisphaerica]	8e-33
HyS0054.71	prd	prd		PRD	OG0000038	Reversed polarity	NA	sequence-specific DNA binding	regulation of transcription, DNA-templated	nucleus	ALJ33549.1 Unc, partial [Clytia hemisphaerica]	4.1e-28
HyS0058.21	prd	prd		PRD	OG0000038	Homeobox protein aristaless	ALX1	sequence-specific DNA binding	multicellular organism development	nucleus	XP_002168027.1 PREDICTED: aristaless-related homeobox protein-like [Hydra vulgaris]	6.2e-57
HyS0062.116	tale	tale	TM231, SIX	SINE*	OG0004567	Sine oculis-like transcription factor	NA	sequence-specific DNA binding	cilium assembly	ciliary membrane	XP_020894370.1 transmembrane protein 231-like [Exaiptasia pallida]	1.9e-81
HyS0078.56	antp	antp		ANTP	OG0000008	Hematopoietically expressed homeobox	HHEX	sequence-specific DNA binding	regulation of transcription, DNA-templated	nucleus	CAB88389.1 homeoprotein, partial [Hydra vulgaris]	1e-21
HyS0083.48	uncl	cers		UNC*	OG0031580	Homeobox domain-containing protein (Fragment)	NA	sequence-specific DNA binding	regulation of transcription, DNA-templated	nucleus	XP_024510821.1 Homeobox domain and Paired domain and Homeodomain-like and Winged helix-turn-helix DNA-binding domain-containing protein [Strongyloides ratti]	1.7e-05
HyS0089.49	antp	antp		ANTP	OG0000008	Homeobox protein ceh-5 (inferred by orthology to a C. elegans protein)	NA	sequence-specific DNA binding	regulation of transcription, DNA-templated	nucleus	RXM28690.1 Homeobox protein HMX1 [Acipenser ruthenus]	2.7e-14
HyS0089.64	antp	antp	FYVE	ANTP	OG0000008	Homeobox domain-containing protein (Fragment)	NA	sequence-specific DNA binding	regulation of transcription, DNA-templated	nucleus	XP_015769505.1 PREDICTED: lateral signaling target protein 2 homolog [Acropora digitifera]	1.4e-25
HyS0098.14	pou	pou	POU	POU	OG0000421	POU domain, class 3, transcription factor 1	NA	sequence-specific DNA binding	brain development	nucleus	AEG66930.1 POU domian transcription factor Polynem, partial [Hydractinia echinata]	1.7e-211
HyS0132.10	antp	antp		ANTP	OG0000008	Homeobox domain-containing protein (Fragment)	NA	sequence-specific DNA binding	regulation of transcription, DNA-templated	nucleus	CAA72534.1 Cn-ems protein [Hydractinia symbiolongicarpus]	7.3e-140
HyS0360.1	prd	prd		PRD	OG0000038	Visual system homeobox 2	NA	sequence-specific DNA binding	regulation of transcription, DNA-templated	nucleus	XP_004208605.2 PREDICTED: visual system homeobox 2-like [Hydra vulgaris]	8.4e-33
HyS0550.6	antp	antp		ANTP	OG0000008	HLXf-ANTP class homeobox protein (Fragment)	NA	sequence-specific DNA binding	regulation of transcription, DNA-templated	nucleus	XP_018426931.1 PREDICTED: homeobox protein Nkx-6.3 [Nanorana parkeri]	7.2e-19
HyS0742.3	uncl	uncl		UNC	OG0000038	Homeobox domain-containing protein (Fragment)	NA	sequence-specific DNA binding	regulation of transcription, DNA-templated	nucleus	XP_016062428.1 PREDICTED: pituitary homeobox 2 [Miniopterus natalensis]	1.1e-09
HyS0802.2	antp	antp		ANTP	OG0000008	Muscle segmentation homeobox	NA	sequence-specific DNA binding	regulation of transcription, DNA-templated	nucleus	AAX58756.1 homeodomain protein Msx [Podocoryna carnea]	7.3e-48
HyS1800.3	antp	antp		ANTP	OG0000008	Homeodomain transcription factor protein GSX	NA	sequence-specific DNA binding	regulation of transcription, DNA-templated	nucleus	ABC00746.1 Cnox-2 [Hydractinia symbiolongicarpus]	1.1e-136
HyS3177.3	lim	lim	LIM	LIM	OG0000157	LIM/homeobox protein Awh	NA	DNA binding	neuron differentiation	nucleus	BAQ19162.1 Lhx6/8 LIM homeobox protein, partial [Cladonema pacificum]	7e-60

## Sheet: Hech_v_Hsym_pairwise
	HyE0001.295	HyS0054.71	HyE1111.3	HyE0002.92	HyS0007.198	HyE0005.46	HyE0117.9	HyS0035.20	HyE0367.3	HyS0017.118	HyS0058.21	HyE0050.108	HyS0009.110	HyE0007.103	HyE1498.4	HyS0028.203	HyE0021.163	HyS0015.289	HyE1684.2	HyE0078.71	HyS0028.140	HyE0094.65	HyS0010.387	HyE0137.41	HyS0022.208	HyE0023.57	HyS0010.23	HyE0044.141	HyS0360.1	HyS0051.140	HyE0212.25	HyE3240.1	HyS0010.323	HyE0122.60	HyS0004.298	HyE0094.36	HyE4150.1	HyS0010.413	HyE0011.129	HyS1800.3	HyS0005.246	HyE0110.24	HyS0053.104	HyE0011.177	HyS0005.209	HyE0015.222	HyS0011.19	HyS0011.24	HyE0028.62
HyE0001.295		100	100	57.14	57.97	50	60.61	59.42	65.67	63.77	59.42	51.39	52.17	53.62	54.55	53.62	48.65	52.17	52.94	47.62	52.17	45.83	47.83	50	47.83	52.17	52.17	47.89	50.75	50	52.31	50.75	50	42.42	40.58	42.86	42.25	43.48	36.49	40.91	39.13	39.71	39.13	32.43	34.85	31.94	33.33	33.33	35.82
HyS0054.71	100		100	58.82	58.82	51.52	62.5	60.29	67.69	65.67	59.42	52.17	52.94	55.22	56.25	54.41	52.17	52.94	54.55	48.72	52.94	47.83	48.53	51.61	47.83	53.73	52.94	49.28	50.75	51.52	53.97	52.31	50	43.08	41.79	44.12	43.48	44.78	39.13	41.54	39.71	40.91	40.3	33.33	34.85	33.33	34.33	33.82	36.92
HyE1111.3	100	100		55.56	59.7	47.22	58.57	61.19	62.86	64.71	62.12	51.39	53.73	50	51.43	53.73	51.43	53.73	50	52.78	53.73	45.83	49.25	48.48	50	50	53.73	47.22	51.52	49.28	51.52	49.28	51.52	42.42	41.18	41.67	41.67	44.12	37.5	40.91	40.3	37.5	39.71	31.94	34.85	31.94	33.82	34.33	33.8
HyE0002.92	57.14	58.82	55.56		100	50	62.86	59.42	67.14	68.12	60.29	54.05	57.97	49.32	51.43	50.72	56.94	57.97	56.94	50	50.72	44.59	47.83	56.06	54.41	46.58	49.28	43.24	47.76	46.38	45.45	43.48	44.12	39.39	39.13	39.19	39.19	42.03	40.54	45.45	43.48	38.89	40.58	32.43	36.36	39.19	39.13	39.13	35.21
HyS0007.198	57.97	58.82	59.7	100		52.24	63.08	59.42	71.21	69.12	60.29	57.97	57.97	51.47	53.85	50.72	57.97	57.97	59.7	50	50.72	47.83	47.83	58.73	54.41	50	49.28	46.38	47.76	47.76	46.88	45.45	44.12	39.39	39.71	42.03	42.03	42.65	43.48	45.45	43.48	40.3	39.71	34.78	36.36	39.13	39.71	39.13	37.88
HyE0005.46	50	51.52	47.22	50	52.24		52.86	53.73	55.71	55.88	78.79	49.32	52.24	48.65	50.7	50.75	52.86	52.24	51.39	36.11	46.27	41.33	46.27	40.91	42.42	39.19	43.28	41.1	45.45	43.48	39.39	39.13	37.88	34.85	35.29	35.06	33.75	39.71	29.49	34.85	34.33	35.44	41.18	33.77	39.39	28.24	35.29	35.82	33.33
HyE0117.9	60.61	62.5	58.57	62.86	63.08	52.86		100	75.36	78.79	71.88	54.29	58.46	58.57	58.57	61.54	58.82	60	57.14	52.94	58.46	58.57	63.08	50	51.56	51.43	55.38	48.57	53.13	50.75	48.48	48.53	51.56	43.08	43.94	50	50	53.03	40	43.08	43.08	41.43	43.94	34.29	37.5	32.86	34.85	35.38	40
HyS0035.20	59.42	60.29	61.19	59.42	59.42	53.73	100		78.79	76.47	67.65	55.07	55.07	58.82	61.54	57.97	56.52	56.52	58.21	50	56.52	59.42	59.42	52.38	50	52.94	52.17	52.17	53.73	52.24	50	50	48.53	42.42	42.65	52.17	52.17	51.47	40.58	42.42	40.58	41.79	41.18	34.78	36.36	33.33	33.82	33.33	42.42
HyE0367.3	65.67	67.69	62.86	67.14	71.21	55.71	75.36	78.79		100	72.31	62.86	65.15	61.43	62.32	63.64	62.32	65.15	61.43	60	63.64	54.29	57.58	57.58	56.92	52.86	56.06	50	53.85	51.47	51.52	49.28	52.31	40.91	41.79	50	50	50.75	40	42.42	42.42	38.57	40.3	31.43	33.85	35.71	37.31	37.88	37.14
HyS0017.118	63.77	65.67	64.71	68.12	69.12	55.88	78.79	76.47	100		71.64	62.32	63.24	60.87	63.64	61.76	62.32	63.24	63.24	56.76	61.76	55.07	55.88	57.81	55.22	55.07	55.88	50.72	52.24	51.47	52.31	50.75	50.75	40.91	40.58	49.28	49.28	49.28	42.03	42.42	42.65	39.71	39.13	31.88	33.33	36.23	36.23	36.76	37.31
HyS0058.21	59.42	59.42	62.12	60.29	60.29	78.79	71.88	67.65	72.31	71.64		59.42	60.29	59.7	62.5	58.82	57.97	58.82	60.61	46.15	52.94	52.17	52.94	54.84	49.28	55.22	54.41	55.07	55.22	56.06	50.79	49.23	47.06	44.62	44.78	48.53	47.83	49.25	42.03	43.08	42.65	45.45	44.78	40.58	40.91	39.13	40.3	39.71	46.15
HyE0050.108	51.39	52.17	51.39	54.05	57.97	49.32	54.29	55.07	62.86	62.32	59.42		100	51.35	52.11	53.62	51.35	55.07	52.78	42.5	49.28	50.65	56.52	46.97	43.48	50	53.62	44.74	50.75	49.28	46.97	44.93	47.06	42.42	40.58	41.33	40.79	44.93	33.77	39.39	37.68	34.25	36.23	28.57	31.82	32.47	36.23	36.23	34.72
HyS0009.110	52.17	52.94	53.73	57.97	57.97	52.24	58.46	55.07	65.15	63.24	60.29	100		54.41	55.38	53.62	55.07	55.07	56.72	42.11	49.28	56.52	56.52	49.21	44.12	54.41	53.62	49.28	50.75	50.75	48.44	46.97	47.06	42.42	41.18	44.93	44.93	45.59	37.68	39.39	37.68	37.31	36.76	30.43	31.82	36.23	36.76	36.23	36.36
HyE0007.103	53.62	55.22	50	49.32	51.47	48.65	58.57	58.82	61.43	60.87	59.7	51.35	54.41		100	100	66.2	67.65	65.28	56.76	63.24	49.33	55.88	53.03	50.75	46.67	51.47	43.24	47.76	46.38	46.97	44.93	47.76	42.42	40.58	45.33	45.33	49.28	30.67	34.85	33.82	44.59	43.48	26.67	30.3	28	30.43	30.88	32.88
HyE1498.4	54.55	56.25	51.43	51.43	53.85	50.7	58.57	61.54	62.32	63.64	62.5	52.11	55.38	100		100	69.12	70.77	67.14	61.76	66.15	52.11	58.46	53.03	53.13	49.3	53.85	43.66	48.44	46.27	46.97	45.59	48.44	43.08	42.42	47.89	47.89	51.52	30.99	33.85	33.85	43.66	43.94	28.17	31.25	28.17	30.3	30.77	33.8
HyS0028.203	53.62	54.41	53.73	50.72	50.72	50.75	61.54	57.97	63.64	61.76	58.82	53.62	53.62	100	100		66.67	66.67	68.66	55.26	62.32	53.62	55.07	53.97	50	51.47	50.72	46.38	47.76	47.76	48.44	46.97	47.06	42.42	41.18	49.28	49.28	50	33.33	34.85	33.33	43.28	42.65	28.99	30.3	30.43	30.88	30.43	33.33
HyE0021.163	48.65	52.17	51.43	56.94	57.97	52.86	58.82	56.52	62.32	62.32	57.97	51.35	55.07	66.2	69.12	66.67		100	100	60.47	73.91	50	53.62	53.03	52.17	50.7	52.17	45.21	49.25	47.83	50	49.28	48.53	43.94	42.03	48.61	47.95	50.72	31.17	34.85	33.33	40	42.03	27.27	31.82	28.38	30.43	30.43	31.88
HyS0015.289	52.17	52.94	53.73	57.97	57.97	52.24	60	56.52	65.15	63.24	58.82	55.07	55.07	67.65	70.77	66.67	100		100	68.42	73.91	53.62	53.62	55.56	52.94	52.94	52.17	47.83	49.25	49.25	51.56	50	48.53	43.94	42.65	50.72	50.72	51.47	33.33	34.85	33.33	40.3	41.18	30.43	31.82	30.43	30.88	30.43	33.33
HyE1684.2	52.94	54.55	50	56.94	59.7	51.39	57.14	58.21	61.43	63.24	60.61	52.78	56.72	65.28	67.14	68.66	100	100		72.22	76.12	51.39	55.22	53.03	54.55	51.39	53.73	45.83	50	47.83	50	49.28	50	43.94	42.65	47.22	47.22	50	31.94	34.85	34.33	40.28	41.18	29.17	31.82	29.17	30.88	31.34	30.99
HyE0078.71	47.62	48.72	52.78	50	50	36.11	52.94	50	60	56.76	46.15	42.5	42.11	56.76	61.76	55.26	60.47	68.42	72.22		100	45	47.37	53.13	43.59	54.05	52.63	41.03	40.54	41.67	63.64	60	55.26	34.29	35.14	42.11	41.03	43.24	25.58	31.43	28.95	33.33	32.43	25.58	25	27.5	29.73	28.95	28.57
HyS0028.140	52.17	52.94	53.73	50.72	50.72	46.27	58.46	56.52	63.64	61.76	52.94	49.28	49.28	63.24	66.15	62.32	73.91	73.91	76.12	100		50.72	50.72	50.79	48.53	52.94	52.17	44.93	44.78	44.78	54.69	53.03	51.47	39.39	39.71	43.48	43.48	44.12	31.88	33.33	31.88	38.81	38.24	27.54	27.27	27.54	27.94	27.54	31.82
HyE0094.65	45.83	47.83	45.83	44.59	47.83	41.33	58.57	59.42	54.29	55.07	52.17	50.65	56.52	49.33	52.11	53.62	50	53.62	51.39	45	50.72		98.55	51.52	47.83	48	49.28	40.79	44.78	43.48	46.97	44.93	45.59	42.42	39.13	45.45	44.87	50.72	32.91	37.88	36.23	36	39.13	26.58	31.82	27.85	31.88	31.88	29.73
HyS0010.387	47.83	48.53	49.25	47.83	47.83	46.27	63.08	59.42	57.58	55.88	52.94	56.52	56.52	55.88	58.46	55.07	53.62	53.62	55.22	47.37	50.72	98.55		53.97	48.53	50	49.28	43.48	44.78	44.78	48.44	46.97	45.59	42.42	39.71	49.28	49.28	50	36.23	37.88	36.23	40.3	39.71	30.43	31.82	31.88	32.35	31.88	30.3
HyE0137.41	50	51.61	48.48	56.06	58.73	40.91	50	52.38	57.58	57.81	54.84	46.97	49.21	53.03	53.03	53.97	53.03	55.56	53.03	53.13	50.79	51.52	53.97		98.39	45.45	47.62	45.45	46.77	46.15	52.31	51.52	54.84	33.33	35.94	43.94	43.94	45.31	40.91	42.86	42.86	39.39	39.06	28.79	30.65	33.33	34.38	34.92	28.79
HyS0022.208	47.83	47.83	50	54.41	54.41	42.42	51.56	50	56.92	55.22	49.28	43.48	44.12	50.75	53.13	50	52.17	52.94	54.55	43.59	48.53	47.83	48.53	98.39		44.78	45.59	43.48	44.78	45.45	52.38	50.77	50	33.85	34.33	42.65	42.03	43.28	37.68	40	38.24	37.88	37.31	28.99	30.3	31.88	32.84	32.35	29.23
HyE0023.57	52.17	53.73	50	46.58	50	39.19	51.43	52.94	52.86	55.07	55.22	50	54.41	46.67	49.3	51.47	50.7	52.94	51.39	54.05	52.94	48	50	45.45	44.78		100	41.89	46.27	44.93	50	47.83	47.76	36.36	36.23	42.67	42.67	46.38	32	34.85	35.29	32.43	33.33	26.67	30.3	29.33	31.88	32.35	41.1
HyS0010.23	52.17	52.94	53.73	49.28	49.28	43.28	55.38	52.17	56.06	55.88	54.41	53.62	53.62	51.47	53.85	50.72	52.17	52.17	53.73	52.63	52.17	49.28	49.28	47.62	45.59	100		44.93	46.27	46.27	51.56	50	48.53	36.36	36.76	46.38	46.38	47.06	34.78	34.85	34.78	34.33	33.82	28.99	30.3	31.88	32.35	31.88	42.42
HyE0044.141	47.89	49.28	47.22	43.24	46.38	41.1	48.57	52.17	50	50.72	55.07	44.74	49.28	43.24	43.66	46.38	45.21	47.83	45.83	41.03	44.93	40.79	43.48	45.45	43.48	41.89	44.93		100	98.55	43.94	42.03	42.65	48.48	46.38	40	39.47	42.03	34.21	39.39	37.68	42.47	43.48	35.53	39.39	30.26	33.33	33.33	34.72
HyS0360.1	50.75	50.75	51.52	47.76	47.76	45.45	53.13	53.73	53.85	52.24	55.22	50.75	50.75	47.76	48.44	47.76	49.25	49.25	50	40.54	44.78	44.78	44.78	46.77	44.78	46.27	46.27	100		100	46.03	44.62	43.28	49.23	46.27	43.28	43.28	43.28	38.81	40	38.81	45.45	44.78	38.81	39.39	34.33	34.33	34.33	38.46
HyS0051.140	50	51.52	49.28	46.38	47.76	43.48	50.75	52.24	51.47	51.47	56.06	49.28	50.75	46.38	46.27	47.76	47.83	49.25	47.83	41.67	44.78	43.48	44.78	46.15	45.45	44.93	46.27	98.55	100		43.94	42.65	43.94	48.48	47.06	42.03	42.03	42.65	37.68	39.39	38.81	43.48	44.12	37.68	39.39	33.33	33.82	34.33	36.76
HyE0212.25	52.31	53.97	51.52	45.45	46.88	39.39	48.48	50	51.52	52.31	50.79	46.97	48.44	46.97	46.97	48.44	50	51.56	50	63.64	54.69	46.97	48.44	52.31	52.38	50	51.56	43.94	46.03	43.94		100	100	34.38	33.85	40.91	40.91	41.54	42.42	43.75	43.75	39.39	40	31.82	33.33	33.33	33.85	34.38	33.33
HyE3240.1	50.75	52.31	49.28	43.48	45.45	39.13	48.53	50	49.28	50.75	49.23	44.93	46.97	44.93	45.59	46.97	49.28	50	49.28	60	53.03	44.93	46.97	51.52	50.77	47.83	50	42.03	44.62	42.65	100		100	33.33	32.84	40.58	40.58	41.79	40.58	42.42	42.42	37.68	38.81	30.43	32.31	31.88	32.84	33.33	31.88
HyS0010.323	50	50	51.52	44.12	44.12	37.88	51.56	48.53	52.31	50.75	47.06	47.06	47.06	47.76	48.44	47.06	48.53	48.53	50	55.26	51.47	45.59	45.59	54.84	50	47.76	48.53	42.65	43.28	43.94	100	100		33.85	32.84	41.18	41.18	41.79	41.18	43.08	41.18	39.39	38.81	30.88	31.82	32.35	32.84	32.35	33.85
HyE0122.60	42.42	43.08	42.42	39.39	39.39	34.85	43.08	42.42	40.91	40.91	44.62	42.42	42.42	42.42	43.08	42.42	43.94	43.94	43.94	34.29	39.39	42.42	42.42	33.33	33.85	36.36	36.36	48.48	49.23	48.48	34.38	33.33	33.85		98.48	40.91	40.91	40.91	33.33	33.33	33.33	36.36	36.36	34.85	33.85	34.85	34.85	34.85	30.3
HyS0004.298	40.58	41.79	41.18	39.13	39.71	35.29	43.94	42.65	41.79	40.58	44.78	40.58	41.18	40.58	42.42	41.18	42.03	42.65	42.65	35.14	39.71	39.13	39.71	35.94	34.33	36.23	36.76	46.38	46.27	47.06	33.85	32.84	32.84	98.48		39.13	39.13	39.13	30.43	31.82	30.88	35.29	34.78	31.88	31.82	31.88	31.88	32.35	29.85
HyE0094.36	42.86	44.12	41.67	39.19	42.03	35.06	50	52.17	50	49.28	48.53	41.33	44.93	45.33	47.89	49.28	48.61	50.72	47.22	42.11	43.48	45.45	49.28	43.94	42.65	42.67	46.38	40	43.28	42.03	40.91	40.58	41.18	40.91	39.13		100	100	25.32	30.3	28.99	29.87	33.33	21.52	25.76	21.52	24.64	24.64	22.67
HyE4150.1	42.25	43.48	41.67	39.19	42.03	33.75	50	52.17	50	49.28	47.83	40.79	44.93	45.33	47.89	49.28	47.95	50.72	47.22	41.03	43.48	44.87	49.28	43.94	42.03	42.67	46.38	39.47	43.28	42.03	40.91	40.58	41.18	40.91	39.13	100		100	24.69	30.3	28.99	29.11	33.33	21.25	25.76	20.48	24.64	24.64	22.67
HyS0010.413	43.48	44.78	44.12	42.03	42.65	39.71	53.03	51.47	50.75	49.28	49.25	44.93	45.59	49.28	51.52	50	50.72	51.47	50	43.24	44.12	50.72	50	45.31	43.28	46.38	47.06	42.03	43.28	42.65	41.54	41.79	41.79	40.91	39.13	100	100		28.99	30.3	29.41	32.35	33.33	24.64	25.76	24.64	24.64	25	25.37
HyE0011.129	36.49	39.13	37.5	40.54	43.48	29.49	40	40.58	40	42.03	42.03	33.77	37.68	30.67	30.99	33.33	31.17	33.33	31.94	25.58	31.88	32.91	36.23	40.91	37.68	32	34.78	34.21	38.81	37.68	42.42	40.58	41.18	33.33	30.43	25.32	24.69	28.99		100	98.55	47.44	53.62	40.23	53.03	43.9	52.17	52.17	45.33
HyS1800.3	40.91	41.54	40.91	45.45	45.45	34.85	43.08	42.42	42.42	42.42	43.08	39.39	39.39	34.85	33.85	34.85	34.85	34.85	34.85	31.43	33.33	37.88	37.88	42.86	40	34.85	34.85	39.39	40	39.39	43.75	42.42	43.08	33.33	31.82	30.3	30.3	30.3	100		100	56.06	56.06	53.03	53.85	54.55	54.55	54.55	51.52
HyS0005.246	39.13	39.71	40.3	43.48	43.48	34.33	43.08	40.58	42.42	42.65	42.65	37.68	37.68	33.82	33.85	33.33	33.33	33.33	34.33	28.95	31.88	36.23	36.23	42.86	38.24	35.29	34.78	37.68	38.81	38.81	43.75	42.42	41.18	33.33	30.88	28.99	28.99	29.41	98.55	100		55.22	54.41	50.72	53.03	52.17	52.94	52.17	51.52
HyE0110.24	39.71	40.91	37.5	38.89	40.3	35.44	41.43	41.79	38.57	39.71	45.45	34.25	37.31	44.59	43.66	43.28	40	40.3	40.28	33.33	38.81	36	40.3	39.39	37.88	32.43	34.33	42.47	45.45	43.48	39.39	37.68	39.39	36.36	35.29	29.87	29.11	32.35	47.44	56.06	55.22		100	45.45	53.03	36.71	42.65	43.28	45.33
HyS0053.104	39.13	40.3	39.71	40.58	39.71	41.18	43.94	41.18	40.3	39.13	44.78	36.23	36.76	43.48	43.94	42.65	42.03	41.18	41.18	32.43	38.24	39.13	39.71	39.06	37.31	33.33	33.82	43.48	44.78	44.12	40	38.81	38.81	36.36	34.78	33.33	33.33	33.33	53.62	56.06	54.41	100		50.72	53.03	42.03	42.03	42.65	50.75
HyE0011.177	32.43	33.33	31.94	32.43	34.78	33.77	34.29	34.78	31.43	31.88	40.58	28.57	30.43	26.67	28.17	28.99	27.27	30.43	29.17	25.58	27.54	26.58	30.43	28.79	28.99	26.67	28.99	35.53	38.81	37.68	31.82	30.43	30.88	34.85	31.88	21.52	21.25	24.64	40.23	53.03	50.72	45.45	50.72		100	49.38	55.07	55.07	49.33
HyS0005.209	34.85	34.85	34.85	36.36	36.36	39.39	37.5	36.36	33.85	33.33	40.91	31.82	31.82	30.3	31.25	30.3	31.82	31.82	31.82	25	27.27	31.82	31.82	30.65	30.3	30.3	30.3	39.39	39.39	39.39	33.33	32.31	31.82	33.85	31.82	25.76	25.76	25.76	53.03	53.85	53.03	53.03	53.03	100		57.58	57.58	57.58	56.92
HyE0015.222	31.94	33.33	31.94	39.19	39.13	28.24	32.86	33.33	35.71	36.23	39.13	32.47	36.23	28	28.17	30.43	28.38	30.43	29.17	27.5	27.54	27.85	31.88	33.33	31.88	29.33	31.88	30.26	34.33	33.33	33.33	31.88	32.35	34.85	31.88	21.52	20.48	24.64	43.9	54.55	52.17	36.71	42.03	49.38	57.58		100	100	49.33
HyS0011.19	33.33	34.33	33.82	39.13	39.71	35.29	34.85	33.82	37.31	36.23	40.3	36.23	36.76	30.43	30.3	30.88	30.43	30.88	30.88	29.73	27.94	31.88	32.35	34.38	32.84	31.88	32.35	33.33	34.33	33.82	33.85	32.84	32.84	34.85	31.88	24.64	24.64	24.64	52.17	54.55	52.94	42.65	42.03	55.07	57.58	100		100	55.22
HyS0011.24	33.33	33.82	34.33	39.13	39.13	35.82	35.38	33.33	37.88	36.76	39.71	36.23	36.23	30.88	30.77	30.43	30.43	30.43	31.34	28.95	27.54	31.88	31.88	34.92	32.35	32.35	31.88	33.33	34.33	34.33	34.38	33.33	32.35	34.85	32.35	24.64	24.64	25	52.17	54.55	52.17	43.28	42.65	55.07	57.58	100	100		56.06
HyE0028.62	35.82	36.92	33.8	35.21	37.88	33.33	40	42.42	37.14	37.31	46.15	34.72	36.36	32.88	33.8	33.33	31.88	33.33	30.99	28.57	31.82	29.73	30.3	28.79	29.23	41.1	42.42	34.72	38.46	36.76	33.33	31.88	33.85	30.3	29.85	22.67	22.67	25.37	45.33	51.52	51.52	45.33	50.75	49.33	56.92	49.33	55.22	56.06
HyS0011.252	34.78	35.29	35.82	36.23	36.23	35.82	43.08	40.58	37.88	36.76	44.12	34.78	34.78	32.35	33.85	31.88	31.88	31.88	32.84	26.32	30.43	30.43	30.43	30.16	27.94	42.65	42.03	36.23	37.31	37.31	34.38	33.33	32.35	30.3	30.88	24.64	24.64	25	49.28	51.52	49.28	50.75	50	53.62	56.06	53.62	54.41	53.62	100
HyS0009.60	46.38	47.06	46.27	43.48	43.48	38.81	50.77	47.83	45.45	44.12	44.12	40.58	40.58	38.24	40	37.68	36.23	36.23	37.31	28.95	40.58	39.13	39.13	42.86	39.71	41.18	40.58	34.78	35.82	35.82	42.19	40.91	39.71	34.85	33.82	31.88	31.88	32.35	52.17	54.55	52.17	49.25	48.53	39.13	40.91	39.13	39.71	39.13	48.48
HyE0213.38	38.81	40	37.14	40	42.42	32.86	42.03	43.94	37.14	38.81	44.62	32.86	34.85	31.43	30.43	33.33	33.33	34.85	32.86	34.29	30.3	37.14	39.39	39.39	40	32.86	34.85	35.71	38.46	36.76	30.3	28.99	30.77	37.88	38.81	31.43	31.43	31.34	47.14	50	50	45.71	47.76	47.14	50.77	44.29	46.27	46.97	42.86
HyS0018.90	37.68	37.68	39.39	41.18	41.18	34.85	45.31	42.65	40	38.81	42.03	33.33	33.82	32.84	32.81	32.35	34.78	35.29	36.36	30.77	29.41	37.68	38.24	41.94	37.68	34.33	33.82	36.23	37.31	37.88	31.75	30.77	29.41	38.46	38.81	30.88	30.43	31.34	47.83	50.77	48.53	48.48	47.76	49.28	50	44.93	46.27	45.59	46.15
HyE0028.134	37.68	38.81	36.11	36.99	38.24	29.73	34.29	36.76	32.86	31.88	34.33	31.08	33.82	28	29.58	29.41	29.58	30.88	29.17	35.14	33.82	32	33.82	33.33	34.33	25.33	27.94	31.08	34.33	34.78	37.88	36.23	37.31	36.36	34.78	26.67	26.67	28.99	40	45.45	44.12	41.89	44.93	33.33	37.88	34.67	36.23	36.76	41.1
HyS0011.313	37.68	37.68	39.39	36.76	36.76	30.3	37.5	36.76	33.85	32.84	33.33	31.88	32.35	29.85	31.25	29.41	30.43	30.88	31.82	33.33	33.82	34.78	35.29	33.87	33.33	28.36	27.94	33.33	34.33	34.85	39.68	38.46	36.76	36.92	35.82	29.41	28.99	29.85	43.48	46.15	44.12	46.97	46.27	37.68	37.88	36.23	37.31	36.76	41.54
HyE0085.29	35.14	36.23	37.5	33.78	36.23	25.64	40	40.58	35.71	36.23	31.88	35.06	36.23	29.33	30.99	31.88	28.57	31.88	30.56	32.56	33.33	30.38	34.78	31.82	30.43	28	30.43	35.53	40.3	39.13	33.33	31.88	32.35	33.33	31.88	25.32	24.69	26.09	36.05	43.94	42.03	42.31	47.83	34.12	42.42	30.49	36.23	36.23	30.67
HyS0089.49	36.76	36.76	37.88	36.76	36.76	30.3	42.19	41.18	38.46	37.31	32.35	36.76	36.76	32.84	34.38	32.35	32.35	32.35	33.33	31.58	33.82	35.29	35.29	32.26	30.88	31.34	30.88	39.71	40.3	40.91	34.92	33.85	32.35	33.85	32.84	26.47	26.47	26.87	42.65	43.08	41.18	50	49.25	41.18	42.42	36.76	37.31	36.76	35.38
HyS0089.64	37.31	37.31	37.88	37.31	37.31	30.3	42.19	41.79	38.46	37.31	32.84	37.31	37.31	32.84	34.38	32.84	32.84	32.84	33.33	32.43	34.33	35.82	35.82	32.26	31.34	31.34	31.34	40.3	40.3	40.91	34.92	33.85	32.84	33.85	32.84	26.87	26.87	26.87	41.79	43.08	41.79	50	49.25	41.79	42.42	37.31	37.31	37.31	35.38
HyE0111.20	38.89	39.13	37.5	36.49	36.23	28	41.43	39.13	35.71	37.68	37.68	31.17	34.78	26.67	28.17	27.54	28.38	27.54	30.56	27.5	31.88	29.11	33.33	33.33	30.43	28	30.43	28.95	31.34	30.43	39.39	39.13	38.24	39.39	37.68	23.38	23.08	26.09	36.71	40.91	40.58	44	47.83	36.71	40.91	30.38	34.78	34.78	37.84
HyS0012.226	40.3	40.3	40.91	37.31	37.31	28.79	42.19	40.3	38.46	38.81	37.31	35.82	35.82	28.36	29.69	28.36	28.36	28.36	28.79	27.03	31.34	34.33	34.33	35.48	31.34	31.34	31.34	31.34	31.34	31.82	41.27	40	38.81	40	38.81	26.87	26.87	26.87	41.79	41.54	41.79	48.48	47.76	40.3	40.91	35.82	35.82	35.82	41.54
HyE0070.68	39.13	40.3	38.03	36.11	36.76	26.76	43.48	42.65	37.14	37.68	35.82	36.11	38.24	36.11	37.68	35.29	33.8	33.82	33.8	35.14	33.82	37.5	39.71	33.33	31.34	34.72	36.76	31.94	34.33	33.33	31.82	30.43	31.34	34.85	31.88	30.56	30.56	31.88	34.72	37.88	36.76	39.44	39.13	31.94	34.85	37.5	39.13	39.71	30
HyS0041.60	40.91	40.91	40.91	37.88	37.88	27.27	45.31	43.94	40	39.39	36.36	39.39	39.39	34.85	35.94	34.85	34.85	34.85	34.85	36.11	34.85	40.91	40.91	33.87	31.82	37.88	37.88	34.85	34.85	34.85	33.33	32.31	31.82	35.38	33.33	33.33	33.33	33.33	37.88	38.46	37.88	39.39	39.39	34.85	34.85	40.91	40.91	40.91	32.31
HyS0550.6	40.91	40.91	40.91	37.88	37.88	27.27	45.31	43.94	40	39.39	36.36	39.39	39.39	34.85	35.94	34.85	34.85	34.85	34.85	36.11	34.85	40.91	40.91	33.87	31.82	37.88	37.88	34.85	34.85	34.85	33.33	32.31	31.82	35.38	33.33	33.33	33.33	33.33	37.88	38.46	37.88	39.39	39.39	34.85	34.85	40.91	40.91	40.91	32.31
HyE0014.152	29.73	31.88	30.56	31.08	33.33	29.11	27.14	27.54	30	30.43	34.78	24.68	27.54	26.67	28.17	27.54	24.68	27.54	26.39	25.58	28.99	29.11	31.88	33.33	31.88	21.33	23.19	22.37	25.37	24.64	28.79	27.54	27.94	37.88	34.78	27.85	26.83	31.88	35.23	43.94	43.48	34.18	36.23	26.97	36.36	33.73	39.13	39.13	30.67
HyE0066.22	28.38	30.43	29.17	39.19	42.03	31.08	30	30.43	34.29	34.78	37.68	33.77	36.23	26.67	28.17	28.99	26.32	28.99	27.78	23.81	26.09	24.36	27.54	34.85	33.33	25.33	27.54	23.68	26.87	26.09	28.79	27.54	27.94	37.88	37.68	27.63	28.57	28.99	33.75	39.39	37.68	31.08	33.33	28.75	34.85	41.03	46.38	44.93	35.62
HyE0518.1	30.88	31.82	29.58	40.85	43.28	32.39	30.43	31.34	34.29	35.29	39.39	36.62	37.31	28.17	28.99	29.85	28.57	29.85	28.17	27.78	26.87	26.76	28.36	34.85	34.85	26.76	28.36	25.35	27.27	26.09	28.79	27.54	28.79	37.88	38.24	29.58	29.58	29.41	36.62	39.39	38.81	32.39	33.82	32.39	34.85	43.66	45.59	44.78	35.71
HyS0018.218	30.43	30.43	31.82	41.18	41.18	31.82	32.81	30.88	38.46	37.31	36.23	34.78	35.29	28.36	29.69	27.94	27.54	27.94	28.79	28.21	27.94	26.09	26.47	35.48	31.88	28.36	27.94	26.09	26.87	27.27	30.16	29.23	27.94	38.46	38.81	29.41	30.43	29.85	39.13	40	38.24	33.33	32.84	31.88	33.33	43.48	44.78	44.12	36.92
HyE0109.89	31.51	33.33	31.94	32.43	34.78	27.03	35.71	36.23	37.14	36.23	33.33	28.57	30.43	30.67	32.39	28.99	25.33	27.54	26.39	24.39	27.54	24.36	27.54	31.82	30.43	26.67	26.09	32.89	37.31	36.23	30.3	28.99	29.41	33.33	33.33	26.32	25.97	28.99	34.18	39.39	37.68	39.19	42.03	32.91	36.36	32.05	36.23	36.23	39.73
HyS0022.92	30.43	30.43	31.82	35.29	35.29	27.27	37.5	35.29	36.92	35.82	31.88	28.99	29.41	28.36	29.69	27.94	26.09	26.47	27.27	25.64	26.47	27.54	27.94	33.87	30.43	25.37	25	36.23	37.31	37.88	30.16	29.23	27.94	33.85	34.33	27.94	27.54	28.36	37.68	38.46	36.76	40.91	40.3	34.78	34.85	36.23	37.31	36.76	38.46
HyE0026.173	38.24	39.39	36.11	37.5	40.3	38.36	37.14	38.81	41.43	41.18	46.97	35.62	38.81	32.88	32.39	34.33	32.86	34.33	31.94	22.22	28.36	26.03	28.36	36.36	36.36	31.51	34.33	36.99	40.91	39.13	33.33	31.88	33.33	34.85	35.29	28.77	28.77	29.41	41.1	45.45	44.78	41.1	44.12	34.25	37.88	39.73	42.65	43.28	38.89
HyS0004.167	37.68	38.24	38.81	39.13	39.13	41.79	40	37.68	42.42	41.18	45.59	37.68	37.68	33.82	33.85	33.33	33.33	33.33	34.33	21.05	27.54	27.54	27.54	38.1	35.29	33.82	33.33	39.13	40.3	40.3	34.38	33.33	32.35	34.85	35.29	28.99	28.99	29.41	43.48	45.45	43.48	44.78	44.12	36.23	37.88	43.48	44.12	43.48	40.91
HyE0026.67	33.82	34.85	31.94	38.89	40.3	31.51	38.57	40.3	37.14	38.24	39.39	30.14	32.84	30.14	29.58	32.84	31.43	32.84	31.94	25	29.85	27.4	29.85	36.36	34.85	30.14	31.34	32.88	34.85	34.78	31.82	30.43	31.82	30.3	29.41	28.77	28.77	29.41	42.47	46.97	46.27	41.1	42.65	31.51	34.85	39.73	41.18	41.79	37.5
HyE1933.2	33.82	34.85	31.94	38.89	40.3	31.94	38.57	40.3	37.14	38.24	39.39	30.56	32.84	30.56	30	32.84	31.43	32.84	31.94	25	29.85	27.78	29.85	36.36	34.85	30.56	31.34	33.33	34.85	34.78	31.82	30.43	31.82	30.3	29.41	27.78	27.78	29.41	43.06	46.97	46.27	41.67	42.65	31.94	34.85	40.28	41.18	41.79	38.03
HyS0004.62	33.33	33.82	34.33	39.13	39.13	34.33	41.54	40.58	39.39	39.71	39.71	31.88	31.88	32.35	32.31	31.88	31.88	31.88	32.84	23.68	28.99	28.99	28.99	36.51	33.82	32.35	31.88	33.33	34.33	34.33	32.81	31.82	30.88	30.3	27.94	30.43	30.43	29.41	46.38	46.97	46.38	43.28	42.65	33.33	34.85	40.58	41.18	40.58	40.91
HyE0077.55	33.82	34.85	33.33	38.89	40.3	31.94	38.57	40.3	35.71	36.76	40.91	40.28	43.28	36.11	37.14	38.81	34.29	35.82	33.33	27.78	29.85	31.94	34.33	33.33	34.85	33.33	35.82	36.11	39.39	37.68	33.33	31.88	33.33	34.85	33.82	31.94	31.94	33.82	37.5	40.91	40.3	38.89	41.18	34.72	37.88	40.28	41.18	41.79	38.03
HyS0022.183	34.33	34.85	34.33	40.3	40.3	34.33	40	40.3	37.88	37.31	40.91	43.28	43.28	38.81	40	38.81	35.82	35.82	35.82	27.78	29.85	34.33	34.33	34.92	34.85	35.82	35.82	38.81	39.39	38.81	34.38	33.33	33.33	34.85	34.33	34.33	34.33	34.33	40.3	40.91	40.3	41.79	41.79	37.31	37.88	41.79	41.79	41.79	40.91
HyS0802.2	34.33	34.85	34.33	40.3	40.3	34.33	40	40.3	37.88	37.31	40.91	43.28	43.28	38.81	40	38.81	35.82	35.82	35.82	27.78	29.85	34.33	34.33	34.92	34.85	35.82	35.82	38.81	39.39	38.81	34.38	33.33	33.33	34.85	34.33	34.33	34.33	34.33	40.3	40.91	40.3	41.79	41.79	37.31	37.88	41.79	41.79	41.79	40.91
HyE0137.52	36.51	37.7	34.85	43.94	46.77	30.3	42.42	45.16	40.91	42.86	39.34	34.85	37.1	30.3	30.3	32.26	35.38	37.1	34.85	35.48	41.94	34.85	37.1	36.92	39.34	33.33	35.48	28.79	29.51	28.13	32.81	32.31	34.43	30.65	31.75	27.27	27.27	28.57	42.42	45.16	45.16	45.45	46.03	36.36	39.34	39.39	41.27	41.94	39.39
HyS0022.220	34.78	34.78	36.36	42.65	42.65	31.82	42.19	39.71	40	40.3	36.23	34.78	35.29	29.85	31.25	29.41	31.88	32.35	33.33	30.77	38.24	31.88	32.35	38.71	36.23	34.33	33.82	26.09	26.87	27.27	33.33	32.31	30.88	29.23	29.85	26.47	26.09	26.87	43.48	44.62	44.12	43.94	43.28	34.78	36.36	40.58	40.3	39.71	41.54
HyE0061.32	43.06	44.93	43.06	43.24	44.93	35.53	40	42.03	40	40.58	43.48	37.66	42.03	36	38.03	37.68	32.43	34.78	33.33	27.5	34.78	32.91	37.68	40.91	40.58	37.33	40.58	35.53	40.3	39.13	39.39	39.13	39.71	36.36	34.78	30.77	31.65	33.33	41.25	50	47.83	43.42	46.38	31.25	37.88	37.5	42.03	42.03	38.67
HyS0132.10	46.27	46.97	46.27	46.27	46.27	38.81	43.08	43.28	42.42	41.79	45.45	43.28	43.28	38.81	40	38.81	35.82	35.82	35.82	30.56	35.82	38.81	38.81	42.86	42.42	41.79	41.79	40.3	40.91	40.3	40.63	40.91	40.91	36.36	35.82	34.33	34.33	34.33	49.25	50	49.25	47.76	47.76	37.31	37.88	43.28	43.28	43.28	42.42
HyE0017.2	32.43	33.33	31.94	36.49	37.68	32	40	39.13	37.14	36.23	37.68	33.77	34.78	33.33	35.21	34.78	31.17	33.33	31.94	25.58	28.99	30.38	33.33	33.33	33.33	29.33	30.43	30.26	34.33	33.33	30.3	28.99	29.41	39.39	36.23	29.87	29.49	33.33	34.94	43.94	42.03	38.67	42.03	32.53	39.39	35.44	40.58	40.58	37.84
HyE3863.1	31.88	32.84	30.56	34.25	35.29	30.14	38.57	38.24	35.71	34.78	37.31	31.08	32.35	35.14	36.62	36.76	32.39	33.82	31.94	24.32	27.94	35.14	36.76	33.33	32.84	27.03	27.94	31.08	34.33	33.33	28.79	27.54	28.36	42.42	39.13	33.78	33.78	36.23	37.84	42.42	41.18	41.1	43.48	33.78	37.88	37.84	40.58	41.18	37.5
HyS0004.350	31.88	32.35	32.84	34.78	34.78	31.34	40	37.68	36.36	35.29	36.76	31.88	31.88	36.76	38.46	36.23	33.33	33.33	34.33	23.68	27.54	36.23	36.23	34.92	32.35	27.94	27.54	33.33	34.33	34.33	29.69	28.79	27.94	42.42	39.71	36.23	36.23	36.76	40.58	42.42	40.58	44.78	44.12	36.23	37.88	40.58	41.18	40.58	36.36
HyE0022.125	38.03	37.68	37.5	35.14	37.68	29.17	34.29	34.78	32.86	33.33	31.88	29.33	30.43	32.88	34.29	34.78	31.51	33.33	31.94	30.77	33.33	28	30.43	33.33	31.88	28.77	31.88	29.33	32.84	31.88	36.36	34.78	36.76	36.36	34.78	22.97	22.67	24.64	37.33	42.42	40.58	34.72	36.23	33.33	37.88	37.33	40.58	40.58	36.62
HyS0038.55	33.33	32.73	32.76	29.31	30.36	25.86	29.31	30.36	27.59	28.07	27.27	25.86	25	29.31	29.31	30.36	27.59	28.57	27.59	20	28.57	25.86	26.79	29.31	29.09	25.86	26.79	24.14	25.45	24.14	29.31	29.31	30.91	30.36	29.82	20.69	20.69	21.05	31.03	32.14	32.14	27.59	28.07	27.59	29.09	31.03	31.58	32.14	27.59
HyE0113.57	42.65	43.94	42.65	41.18	41.79	30.88	46.97	46.27	43.28	42.65	40.91	41.18	41.79	35.29	36.36	35.82	41.18	41.79	41.18	38.89	40.3	38.24	38.81	40.63	40.91	38.24	38.81	38.24	39.39	38.24	38.46	37.31	37.88	31.82	30.88	29.41	29.41	29.41	47.06	48.48	47.76	41.18	41.18	39.71	40.91	36.76	36.76	37.31	41.79
HyS0046.135	42.03	42.65	43.28	40.58	40.58	31.34	47.69	46.38	43.94	42.65	39.71	40.58	40.58	35.29	36.92	34.78	40.58	40.58	41.79	36.84	39.13	37.68	37.68	41.27	41.18	38.24	39.13	39.13	40.3	38.81	39.06	37.88	38.24	31.82	30.88	28.99	28.99	29.41	46.38	48.48	46.38	41.79	41.18	39.13	40.91	36.23	36.76	36.23	42.42
HyE0028.10	34.78	35.82	34.78	41.43	42.65	27.54	35.82	35.29	35.29	34.78	35.82	30	30.88	28.57	29.85	29.41	30	30.88	30.43	35.14	29.41	30	30.88	38.46	37.31	27.14	27.94	35.71	37.31	37.68	33.33	33.82	32.84	31.82	31.88	30	30	30.43	40	42.42	41.18	36.23	36.23	37.14	39.39	32.86	33.33	33.82	27.94
HyS0078.56	36.36	36.36	36.36	43.94	43.94	28.79	37.5	36.36	36.92	36.36	36.36	31.82	31.82	30.3	31.25	30.3	31.82	31.82	31.82	36.11	30.3	31.82	31.82	38.71	37.88	28.79	28.79	37.88	37.88	37.88	33.33	33.85	33.33	32.31	33.33	31.82	31.82	31.82	40.91	41.54	40.91	37.88	37.88	39.39	39.39	34.85	34.85	34.85	29.23
HyE0018.78	30.99	31.88	31.94	27.03	28.99	22.35	31.43	30.43	30	28.99	28.99	26.32	28.99	26.67	25.35	28.99	26.03	27.54	26.39	30.77	27.54	32.05	34.78	30.3	27.54	25.33	26.09	23.68	26.87	26.09	27.27	26.09	27.94	28.79	27.54	21.52	21.69	24.64	27.16	33.33	31.88	37.97	42.03	32.5	39.39	29.21	37.68	36.23	36
HyS0024.46	33.33	34	33.33	29.41	29.41	33.33	35.29	35.29	31.37	31.37	34	29.41	29.41	31.37	31.37	31.37	33.33	33.33	33.33	40	31.37	37.25	37.25	29.41	30	29.41	29.41	29.41	30	29.41	29.41	29.41	30	27.45	27.45	29.41	29.41	29.41	33.33	33.33	33.33	41.18	41.18	37.25	38	37.25	37.25	37.25	39.22
HyE0019.93	36.62	37.68	34.72	35.14	34.78	25.64	40	37.68	38.57	39.13	36.23	35.53	39.13	33.33	33.8	34.78	39.73	42.03	38.89	35.9	37.68	29.49	33.33	34.85	34.78	38.67	42.03	36.84	40.3	40.58	34.85	33.33	32.35	33.33	33.33	29.11	28.4	33.33	28.4	34.85	33.33	32.05	34.78	37.5	42.42	30.86	34.78	36.23	30.67
HyE3613.3	38.46	39.68	36.23	37.68	37.5	28.99	40.58	40.63	39.71	41.54	39.68	39.13	42.19	34.78	34.78	37.5	40.3	42.19	39.13	42.42	40.63	33.33	35.94	34.85	38.1	40.58	43.75	39.13	42.86	42.42	34.85	34.33	34.92	31.25	30.77	31.88	31.88	33.85	33.33	35.94	35.94	31.88	33.85	39.13	42.86	34.78	36.92	37.5	33.33
HyS0034.123	36.76	37.31	37.31	35.29	35.29	29.85	40	38.24	40.91	39.71	37.31	39.71	39.71	35.29	36.92	35.29	42.65	42.65	41.79	37.84	38.24	33.82	33.82	34.92	34.33	42.65	42.65	39.71	40.3	40.3	34.38	33.33	32.84	33.33	33.82	33.82	33.82	33.82	33.82	34.85	33.82	34.33	35.29	41.18	42.42	35.29	35.29	35.29	34.85
HyE0025.16	33.8	34.78	34.72	36.49	37.68	26.32	32.86	30.43	31.43	31.88	33.33	30.26	31.88	28	29.58	28.99	30.14	30.43	30.56	33.33	31.88	28.21	33.33	37.88	34.78	33.33	36.23	26.32	28.36	27.54	33.33	31.88	32.35	28.79	27.54	32.05	31.65	34.78	21.52	25.76	24.64	25	26.09	26.58	28.79	22.78	26.09	26.09	21.33
HyS0017.231	34.78	35.29	35.82	36.23	36.23	28.36	32.31	30.43	33.33	32.35	32.35	31.88	31.88	29.41	30.77	28.99	31.88	31.88	32.84	34.21	31.88	31.88	33.33	39.68	35.29	36.76	36.23	28.99	28.36	28.36	34.38	33.33	32.35	30.3	29.41	34.78	34.78	35.29	24.64	25.76	24.64	25.37	25	31.88	30.3	26.09	26.47	26.09	24.24
HyS3177.3	36.92	36.92	36.92	36.92	36.92	29.23	32.81	32.31	33.85	33.85	32.31	32.31	32.31	30.77	31.25	30.77	33.85	33.85	33.85	34.29	32.31	33.85	35.38	40.32	36.92	38.46	38.46	29.23	29.23	29.23	34.92	33.85	33.85	29.23	29.23	36.92	36.92	36.92	26.15	26.15	26.15	26.15	26.15	30.77	30.77	27.69	27.69	27.69	24.62
HyS0046.28	33.82	34.33	34.33	36.76	36.76	31.34	40	38.24	40.91	39.71	37.31	41.18	41.18	35.29	36.92	35.29	38.24	38.24	38.81	29.73	35.29	35.29	33.82	33.33	29.85	35.29	35.29	29.41	29.85	29.85	31.25	30.3	29.85	28.79	27.94	29.41	29.41	29.41	29.41	30.3	29.41	22.39	22.06	23.53	24.24	27.94	27.94	27.94	24.24
HyE0013.109	34.67	37.68	37.14	31.94	32.86	25.71	39.71	38.57	36.23	35.71	30.43	33.78	35.71	36.62	38.24	37.14	30.26	32.86	32.86	33.33	35.71	29.73	30	33.33	31.88	29.58	30	34.25	37.31	35.71	40.3	39.13	39.71	34.33	32.86	29.17	28.77	30	28.95	32.84	31.43	32.86	32.86	23.68	25.76	24.32	24.29	24.29	28.99
HyS0021.139	36.23	36.23	37.88	32.35	32.35	25.76	40.63	38.24	36.92	35.82	28.99	34.78	35.29	37.31	39.06	36.76	31.88	32.35	33.33	33.33	35.29	28.99	29.41	37.1	33.33	29.85	29.41	34.78	35.82	36.36	41.27	40	38.24	32.31	31.34	29.41	28.99	29.85	31.88	33.85	32.35	34.85	34.33	24.64	25.76	24.64	25.37	25	29.23
HyS0742.3	37.31	37.31	37.88	32.84	32.84	25.76	40.63	38.81	36.92	35.82	29.85	34.33	34.33	37.31	39.06	37.31	32.84	32.84	33.33	35.14	35.82	29.85	29.85	37.1	34.33	29.85	29.85	35.82	35.82	36.36	41.27	40	38.81	32.31	31.34	29.85	29.85	29.85	32.84	33.85	32.84	34.85	34.33	25.37	25.76	25.37	25.37	25.37	29.23
HyE0047.28	37.14	38.24	36.11	37.84	39.13	26.32	38.57	40.58	37.14	36.23	33.82	30.67	31.88	29.33	30.99	28.99	30.56	31.88	30.56	34.21	31.88	25.97	27.54	31.82	32.35	32	34.78	36	40.3	37.68	28.79	28.99	29.41	30.3	28.99	33.33	33.33	36.23	26.92	31.82	30.43	26.32	27.54	28.21	31.82	24.36	27.54	27.54	28
HyE2527.2	36.92	38.1	35.29	41.18	42.19	27.94	39.71	40.63	38.24	38.46	34.92	33.82	34.38	32.35	32.35	31.25	32.84	34.38	32.35	36.36	32.81	27.94	29.69	31.82	33.33	35.29	37.5	36.76	39.68	37.88	28.79	28.36	30.16	31.25	30.77	35.29	35.29	36.92	30.88	32.81	32.81	29.41	29.23	32.35	33.33	27.94	29.23	29.69	30.88
HyS0032.236	39.13	39.13	37.88	39.71	39.71	27.27	40.63	41.18	38.46	37.31	33.33	31.88	32.35	29.85	31.25	29.41	31.88	32.35	33.33	33.33	32.35	27.54	27.94	32.26	31.88	35.82	35.29	39.13	40.3	39.39	30.16	30.77	29.41	29.23	28.36	36.76	36.23	37.31	30.43	32.31	30.88	28.79	28.36	31.88	33.33	27.54	28.36	27.94	30.77
HyE0080.51	34.72	36.23	34.72	37.84	37.68	34.67	41.43	40.58	40	40.58	39.13	36.36	39.13	36	38.03	39.13	35.14	37.68	36.11	35	39.13	36.71	39.13	36.36	36.23	36	39.13	31.58	34.33	34.78	33.33	31.88	32.35	31.82	30.43	32.47	32.05	34.78	27.85	33.33	31.88	30.67	33.33	25.32	28.79	25.32	28.99	28.99	28.38
HyE0478.8	37.88	39.06	36.23	39.13	40	37.68	40.58	41.54	40.58	42.42	42.19	39.13	41.54	39.13	39.13	41.54	38.24	40	37.68	38.24	40	37.68	40	36.36	39.06	39.13	41.54	33.33	35.94	35.82	33.33	32.35	34.38	32.31	31.82	36.23	36.23	36.36	31.88	33.85	33.85	33.33	34.85	28.99	29.69	28.99	30.3	30.77	30.43
HyE0478.9	39.06	40.32	36.76	41.18	41.27	38.24	42.65	42.86	41.79	43.75	43.55	39.71	42.86	38.24	38.24	41.27	39.39	41.27	38.24	40.63	41.27	36.76	39.68	36.36	40.32	39.71	42.86	33.82	37.1	36.92	33.85	33.33	35.48	33.33	32.81	36.76	36.76	37.5	32.35	34.92	34.92	33.82	35.94	29.41	30.65	29.41	31.25	31.75	30.88
HyS0009.272	36.23	36.76	37.31	37.68	37.68	38.81	41.54	40.58	42.42	41.18	39.71	39.13	39.13	39.71	41.54	39.13	37.68	37.68	38.81	36.84	39.13	39.13	39.13	38.1	36.76	39.71	39.13	33.33	34.33	34.33	34.38	33.33	32.35	31.82	30.88	34.78	34.78	35.29	31.88	33.33	31.88	34.33	33.82	28.99	28.79	28.99	29.41	28.99	31.82
HyE0122.10	29.85	30.77	28.99	30.43	31.82	23.19	27.94	28.79	30.43	31.34	27.69	31.88	33.33	30.43	30.88	31.82	27.54	28.79	27.54	31.43	30.3	28.99	31.82	27.27	27.69	28.99	30.3	30.43	32.31	30.88	25.76	24.64	26.15	27.27	26.87	33.33	33.33	34.33	33.33	34.85	34.85	28.99	29.85	23.19	24.62	24.64	25.37	25.76	24.64
HyS0004.342	28.99	29.85	29.41	30.43	30.88	23.53	28.79	27.94	31.34	31.88	28.36	30.43	30.88	28.99	30.3	29.41	28.99	29.41	29.41	32.43	30.88	28.99	29.41	29.69	28.36	30.43	30.88	28.99	29.85	29.41	26.15	25.37	25.37	30.3	30.43	34.78	34.78	34.78	31.88	33.33	32.35	29.41	28.99	24.64	25.76	24.64	24.64	25	25.37
HyE0072.35	30.88	31.82	29.17	26.39	28.36	24.66	35.71	37.31	31.43	32.35	34.85	32.88	35.82	28.77	28.17	31.34	28.57	28.36	27.78	19.44	26.87	21.92	22.39	24.24	24.24	32.88	34.33	28.77	31.82	30.43	28.79	28.99	31.82	24.24	23.53	24.66	24.66	26.47	30.14	33.33	32.84	26.03	27.94	31.51	34.85	34.25	36.76	37.31	36.11
HyS0028.48	32.35	32.84	32.84	29.41	29.41	25.37	40	38.24	34.85	33.82	32.84	33.82	33.82	32.35	32.31	32.35	29.41	29.41	29.85	21.62	27.94	23.53	23.53	26.98	25.37	32.35	32.35	29.41	29.85	29.85	31.25	31.82	32.84	22.73	22.06	27.94	27.94	27.94	33.82	34.85	33.82	29.85	29.41	33.82	33.33	35.29	35.29	35.29	37.88
HyE0019.68	26.87	27.69	25.35	29.58	31.82	26.03	28.57	30.3	22.86	23.88	29.23	23.61	25.76	27.4	28.17	30.3	24.64	25.76	23.94	25.71	24.24	28.77	31.82	27.27	29.23	21.92	24.24	26.39	27.69	27.94	28.79	27.54	29.23	21.21	22.39	28.77	28.77	31.34	28.77	31.82	31.82	28.77	31.34	28.77	32.31	23.29	25.37	25.76	27.4
HyS0034.96	27.27	27.69	27.27	31.82	31.82	28.79	30.77	30.3	24.24	24.24	29.23	25.76	25.76	30.3	30.77	30.3	25.76	25.76	25.76	25.71	24.24	31.82	31.82	26.98	29.23	24.24	24.24	27.27	27.69	27.27	29.69	28.79	29.23	21.21	21.21	31.82	31.82	31.82	31.82	31.82	31.82	31.82	31.82	31.82	32.31	25.76	25.76	25.76	30.3
HyE0019.69	24.32	24.64	23.61	22.97	24.64	18.92	24.29	24.64	20	20.29	23.19	18.18	20.29	18.67	19.72	20.29	19.48	20.29	19.44	11.63	17.39	21.79	24.64	21.21	18.84	16	17.39	18.42	19.4	20.29	24.24	23.19	23.53	15.15	15.94	22.37	22.08	24.64	20.99	24.24	23.19	18.92	20.29	18.52	22.73	16.67	18.84	18.84	24.66
HyE0062.120	27.14	27.94	26.39	29.73	30.43	23.08	32.86	31.88	28.57	28.99	30.88	22.67	24.64	32	32.39	33.33	31.94	30.43	31.94	26.32	26.09	23.38	26.09	28.79	29.41	26.67	27.54	25.33	28.36	27.54	30.3	28.99	29.41	21.21	20.29	26.58	26.25	28.99	23.75	28.79	27.54	32.05	36.23	24.05	27.27	22.5	26.09	26.09	30.67
HyE3813.2	27.94	28.79	27.54	31.88	31.34	26.09	34.33	32.84	29.41	29.41	31.82	24.64	25.37	34.78	34.33	34.33	33.33	31.34	33.33	27.78	26.87	26.09	26.87	29.23	30.3	27.54	28.36	27.54	28.79	27.54	30.3	29.41	30.3	21.21	20.59	28.99	28.99	29.41	27.54	28.79	28.36	36.23	36.76	26.09	27.27	26.09	26.47	26.87	32.35
HyS0098.14	26.47	26.87	26.87	29.41	29.41	26.87	33.85	32.35	28.79	27.94	32.84	25	25	33.82	33.85	33.82	30.88	30.88	31.34	27.03	26.47	26.47	26.47	28.57	28.36	29.41	29.41	26.47	26.87	26.87	29.69	28.79	28.36	21.21	20.59	27.94	27.94	27.94	26.47	27.27	26.47	34.33	33.82	27.94	28.79	26.47	26.47	26.47	34.85
HyE0088.53	21.92	23.19	23.61	22.97	24.64	26.03	27.14	26.09	25.71	24.64	24.64	25.97	27.54	25.68	25.35	27.54	25.33	27.54	25	14.63	23.19	20.78	23.19	28.79	28.99	20.27	21.74	23.68	26.87	26.09	24.24	23.19	25	18.18	17.39	25.33	25	27.54	23.08	27.27	26.09	28.77	30.43	26.92	30.3	18.18	20.29	20.29	22.22
HyS0008.328	23.19	23.19	24.24	25	25	28.79	28.13	26.47	26.15	25.37	24.64	27.54	27.94	28.36	28.13	27.94	27.54	27.94	27.27	15.38	23.53	23.19	23.53	29.03	28.99	22.39	22.06	24.64	25.37	25.76	25.4	24.62	25	20	19.4	27.94	27.54	28.36	26.09	27.69	26.47	30.3	29.85	28.99	30.3	20.29	20.9	20.59	24.62
HyE0084.29	30.3	30.16	31.67	30.65	30.65	26.67	34.48	32.26	32.2	31.15	26.98	26.56	27.42	24.59	25.86	24.19	31.34	32.26	30	13.64	25.81	26.56	27.42	28.57	28.57	27.87	27.42	31.75	32.79	33.33	28.07	27.12	25.81	28.81	26.23	22.58	22.22	22.95	28.57	32.2	30.65	31.67	32.79	29.17	35	29.69	31.15	30.65	28.81
HyE0352.10	32.79	32.79	33.33	32.79	32.79	26.67	36.21	34.43	33.9	32.79	29.51	31.15	31.15	26.23	27.59	26.23	32.79	32.79	31.67	18.42	27.87	27.87	27.87	30.36	29.51	29.51	29.51	32.79	32.79	33.33	31.58	30.51	29.51	28.81	27.87	26.23	26.23	26.23	31.15	32.2	31.15	33.33	34.43	34.43	35	31.15	31.15	31.15	30.51
HyS0083.48	34.85	34.85	34.85	33.33	33.33	27.27	35.38	34.85	33.33	33.33	30.3	33.33	33.33	28.79	29.23	28.79	28.79	28.79	28.79	19.44	27.27	28.79	30.3	30.16	28.79	30.3	30.3	34.85	34.85	34.85	29.69	28.79	28.79	25.76	25.76	24.24	24.24	24.24	31.82	31.82	31.82	33.33	33.33	34.85	34.85	30.3	30.3	30.3	30.3
HyE0005.259	18.57	19.4	20.31	19.7	19.7	15.63	20.97	19.7	19.05	21.54	19.4	17.65	18.18	20	20.97	21.21	22.54	22.73	23.44	20.93	21.21	19.12	19.7	21.67	20.9	21.54	21.21	17.91	18.46	18.75	19.67	19.05	18.18	17.46	16.92	18.18	17.91	18.46	18.92	20.63	21.21	21.88	21.54	18.42	20.31	19.12	20	19.7	15.87
HyS0001.518	18.84	19.12	18.84	18.84	18.84	15.94	19.12	18.84	17.39	17.39	19.12	17.39	17.39	18.84	19.12	18.84	21.74	21.74	21.74	22.86	20.29	18.84	18.84	19.7	20.59	18.84	18.84	17.39	17.65	17.39	17.91	17.39	17.65	17.39	17.39	17.39	17.39	17.39	18.84	18.84	18.84	20.29	20.29	20.29	20.59	20.29	20.29	20.29	17.39
HyE0044.55	19.72	19.72	20.59	21.43	21.43	14.71	18.18	17.14	19.4	20.29	15.49	18.31	18.57	17.39	18.18	17.14	19.72	20	20.59	20.51	20	18.31	18.57	21.88	19.72	20.29	20	18.31	18.84	19.12	20	19.4	18.57	17.91	17.39	18.57	18.31	18.84	18.31	17.91	17.14	19.12	18.84	15.49	16.18	16.9	17.39	17.14	14.93
HyS0051.77	20.59	20.59	20.59	22.06	22.06	14.71	17.91	17.65	19.12	19.12	16.18	19.12	19.12	17.65	17.91	17.65	20.59	20.59	20.59	22.86	20.59	19.12	19.12	21.54	20.59	20.59	20.59	19.12	19.12	19.12	19.7	19.12	19.12	17.65	17.65	19.12	19.12	19.12	17.65	17.65	17.65	19.12	19.12	16.18	16.18	17.65	17.65	17.65	14.71
HyE0051.123	20.55	21.43	20.9	20.29	20.29	16.42	24.62	23.19	24.24	25	18.57	21.13	21.74	20.59	21.54	20.29	16.22	17.39	17.91	18.6	17.39	21.13	21.74	22.22	20	20.59	20.29	18.57	19.12	19.4	18.75	18.18	17.39	16.67	16.18	21.74	21.43	22.06	19.48	21.21	21.74	20.9	20.59	20.25	23.88	22.54	23.53	23.19	22.73
HyS0062.116	18.84	18.84	18.84	20.29	20.29	15.94	23.88	23.19	23.53	23.19	17.39	21.74	21.74	20.29	20.9	20.29	17.39	17.39	17.39	19.44	17.39	21.74	21.74	21.54	20.29	18.84	18.84	21.74	21.74	21.74	18.18	17.65	17.39	17.65	17.39	23.19	23.19	23.19	20.29	20.59	20.29	20.29	20.29	24.64	24.64	23.19	23.19	23.19	23.53
HyE0113.43	29.41	29.41	29.41	29.41	29.41	19.12	27.27	27.94	26.87	26.47	23.53	32.35	32.35	27.94	28.79	27.94	25	25	25	22.22	25	27.94	29.41	26.56	27.94	25	25	20.59	20.59	20.59	26.15	25.37	25	20.9	20.59	29.41	29.41	29.41	22.06	22.39	22.06	25	25	22.06	22.06	26.47	26.47	26.47	23.88
HyS0046.123	28.99	28.99	29.41	28.99	28.99	19.12	27.27	27.54	26.87	26.09	23.19	31.88	31.88	27.54	28.79	27.54	24.64	24.64	25	21.62	24.64	27.54	28.99	26.56	27.54	24.64	24.64	20.29	20.29	20.59	26.15	25.37	24.64	20.9	20.29	28.99	28.99	28.99	21.74	22.39	21.74	25	24.64	23.19	22.06	26.09	26.09	26.09	23.88
HyS0046.118	23.44	23.44	23.44	23.44	23.44	17.19	21.88	21.88	20.31	20.31	18.75	26.56	26.56	26.56	26.56	26.56	23.44	23.44	23.44	15.63	21.88	23.44	25	21.88	23.44	20.31	20.31	15.63	15.63	15.63	23.44	23.44	23.44	20.31	20.31	25	25	25	15.63	15.63	15.63	18.75	18.75	15.63	15.63	18.75	18.75	18.75	15.63
HyE0008.252	20.83	20.29	21.21	23.53	23.53	15.15	23.44	22.06	24.62	23.88	20.29	20	20.59	17.91	18.75	17.65	19.18	19.12	19.7	16.28	16.18	18.57	19.12	24.19	23.19	22.39	22.06	20.29	20.9	21.21	23.81	23.08	23.53	21.54	20.9	20.59	20.29	20.9	23.68	26.15	25	21.21	20.9	25	25.76	25.71	26.87	26.47	20
HyS0002.33	20.29	20.59	20.29	23.19	23.19	14.49	22.06	21.74	23.19	23.19	20.59	20.29	20.29	17.39	17.65	17.39	18.84	18.84	18.84	17.14	15.94	17.39	17.39	22.73	22.06	21.74	21.74	20.29	20.59	20.29	22.39	21.74	22.06	20.29	20.29	20.29	20.29	20.29	24.64	24.64	24.64	20.29	20.29	24.64	25	24.64	24.64	24.64	18.84
HyE0076.62	26.09	26.47	26.87	23.19	23.19	20.9	24.62	23.19	27.27	26.47	23.53	23.19	23.19	26.47	27.69	26.09	27.54	27.54	26.87	26.32	23.19	23.19	23.19	31.75	29.41	20.59	20.29	17.39	17.91	17.91	23.44	22.73	22.06	24.24	23.53	26.09	26.09	26.47	17.39	18.18	17.39	23.88	23.53	18.84	19.7	17.39	17.65	17.39	13.64
HyE0082.29	20.55	21.74	22.39	18.84	18.84	11.94	24.62	23.19	22.73	22.06	17.39	15.49	15.94	22.06	23.08	21.74	22.97	21.74	22.39	25.58	21.74	19.72	21.74	23.81	24.64	20.59	21.74	28.57	29.85	29.85	23.44	22.73	23.53	25.76	23.53	17.39	17.14	17.65	16.88	19.7	18.84	22.39	22.06	20.25	24.24	19.72	20.59	20.29	16.67
HyE4586.1	21.13	22.06	23.08	19.4	19.4	12.31	25.4	23.88	23.44	22.73	17.65	15.94	16.42	22.73	23.81	22.39	23.94	22.39	23.08	26.19	22.39	20.29	22.39	24.59	25	21.21	22.39	29.41	30.3	30.77	24.19	23.44	23.88	26.56	24.24	17.91	17.65	18.18	18.31	20.31	19.4	23.08	22.73	21.13	23.08	18.84	19.7	19.4	17.19
HyS0003.228	21.74	21.74	22.73	19.12	19.12	12.12	25	25	23.08	22.39	17.39	18.84	19.12	22.39	23.44	22.06	21.74	22.06	22.73	28.21	22.06	18.84	20.59	24.19	26.09	20.9	22.06	28.99	29.85	30.3	23.81	23.08	23.53	24.62	23.88	17.65	17.39	17.91	17.39	18.46	17.65	21.21	20.9	21.74	22.73	18.84	19.4	19.12	16.92
HyE0247.11	21.31	21.31	21.31	27.87	27.87	14.75	24.59	24.59	26.23	26.23	19.67	22.95	22.95	26.23	26.23	26.23	24.59	24.59	24.59	29.41	24.59	22.95	24.59	28.81	26.23	26.23	26.23	19.67	19.67	19.67	25	24.59	24.59	24.59	24.59	22.95	22.95	22.95	22.95	22.95	22.95	22.95	22.95	18.03	18.03	22.95	22.95	22.95	19.67
HyS0025.85	24.24	24.24	24.24	25.76	25.76	13.64	23.44	24.24	24.62	24.24	18.18	21.21	21.21	24.24	25	24.24	21.21	21.21	21.21	27.78	22.73	21.21	22.73	27.42	25.76	24.24	24.24	21.21	21.21	21.21	23.81	23.08	22.73	24.62	24.24	21.21	21.21	21.21	21.21	21.54	21.21	21.21	21.21	19.7	19.7	22.73	22.73	22.73	18.46
HyS0025.95	23.19	23.53	23.88	24.64	24.64	13.43	23.08	23.19	24.24	23.53	17.65	20.29	20.29	23.53	24.62	23.19	21.74	21.74	20.9	26.32	21.74	20.29	21.74	26.98	25	23.53	23.19	20.29	20.9	20.9	23.44	22.73	22.06	24.24	23.53	21.74	21.74	22.06	20.29	21.21	20.29	20.9	22.06	18.84	19.7	21.74	22.06	21.74	18.18
HyE0137.39	22.73	22.73	23.44	21.21	21.21	14.06	22.58	21.21	23.81	23.08	19.7	19.7	19.7	21.54	22.58	21.21	24.24	24.24	25	31.58	24.24	22.73	22.73	30	27.27	23.08	22.73	18.18	18.46	18.75	26.23	25.4	24.24	22.22	21.54	18.18	18.18	18.46	19.7	20.63	19.7	18.75	18.46	18.18	18.75	22.73	23.08	22.73	19.05
HyS0022.206	21.74	22.06	23.08	20.9	20.9	13.85	22.22	20.9	23.44	22.73	19.12	18.84	19.4	21.21	22.22	20.9	23.19	23.88	24.62	30	23.88	23.19	22.39	29.51	26.47	22.73	22.39	19.12	19.7	20	25.81	25	23.88	23.44	22.73	19.4	19.12	19.7	18.84	20.31	19.4	18.46	18.18	18.84	20	23.19	22.73	22.39	18.75
HyE0006.148	20	21.43	21.92	22.67	24.29	23.46	23.94	24.29	22.54	22.86	27.14	21.79	24.29	22.37	22.22	22.86	24.68	25.71	23.29	16.67	21.43	20	22.86	25.37	27.14	23.68	25.71	22.08	25	24.29	26.87	25.71	24.64	19.4	18.57	20	19.05	21.43	24.71	29.85	28.57	22.5	25.71	26.19	32.84	25.88	30	28.57	22.37
HyE1000.1	22.06	22.73	22.22	23.61	25.37	25.33	23.94	25.37	22.54	23.53	28.79	23.29	25.37	22.97	22.22	23.88	24.29	25.37	23.61	17.14	22.39	21.33	23.88	25.37	28.79	24.32	26.87	23.29	25.76	24.64	26.87	25.71	25.76	19.4	19.12	20	20	20.59	28	29.85	29.85	24	25	29.33	33.33	29.33	30.88	29.85	22.67
HyE1836.3	21.43	22.06	21.13	23.61	24.64	26.76	24.64	24.64	22.86	22.86	27.94	23.61	24.64	22.22	23.19	23.19	25	26.09	23.94	16.22	21.74	22.22	23.19	25.37	27.94	25	26.09	23.61	25	24.29	26.87	25.71	25	19.4	18.57	20.83	20.83	21.43	27.78	29.85	28.99	23.94	25.71	30.56	32.84	29.17	30	28.99	24.29
HyS0020.252	20.29	20.59	20.59	26.09	26.09	26.47	24.24	23.19	22.39	21.74	27.94	23.19	23.19	21.74	22.73	21.74	24.64	24.64	23.53	16.22	20.29	23.19	23.19	26.56	27.94	26.09	26.09	21.74	22.06	22.06	23.08	22.39	22.06	17.91	17.39	21.74	21.74	21.74	26.09	26.87	26.09	22.06	23.19	31.88	32.84	30.43	30.43	30.43	25.37
HyE0001.5	21.31	21.31	21.31	19.67	19.67	16.39	18.03	18.03	19.67	19.67	18.03	18.03	18.03	16.39	16.39	16.39	16.39	16.39	16.39	18.18	18.03	19.67	19.67	21.67	19.67	14.75	14.75	14.75	14.75	14.75	18.03	18.03	18.03	18.03	18.03	14.75	14.75	14.75	16.39	16.39	16.39	13.11	13.11	11.48	11.48	19.67	19.67	19.67	14.75
HyE2966.2	22.41	22.41	22.41	20.69	20.69	17.24	18.97	18.97	20.69	20.69	18.97	18.97	18.97	17.24	17.24	17.24	17.24	17.24	17.24	18.18	18.97	20.69	20.69	22.81	20.69	15.52	15.52	15.52	15.52	15.52	18.97	18.97	18.97	18.97	18.97	15.52	15.52	15.52	17.24	17.24	17.24	13.79	13.79	10.34	10.34	18.97	18.97	18.97	13.79
HyS0019.183	21.88	21.88	21.88	20.31	20.31	17.19	18.75	18.75	20.31	20.31	18.75	20.31	20.31	15.63	15.63	15.63	15.63	15.63	15.63	17.65	17.19	18.75	18.75	20.97	18.75	14.06	14.06	17.19	17.19	17.19	17.46	17.19	17.19	20.31	20.31	15.63	15.63	15.63	17.19	17.19	17.19	14.06	14.06	14.06	14.06	20.31	20.31	20.31	15.63
HyE0028.77	19.35	20.34	21.43	25.86	25.86	19.64	20.37	18.97	21.82	21.05	18.64	20	20.69	19.3	20.37	18.97	19.05	20.69	19.64	13.95	18.97	15	15.52	25	22.03	21.05	20.69	23.73	24.56	25	24.53	23.64	22.41	14.55	14.04	17.24	16.95	17.54	17.19	20	18.97	17.86	17.54	17.19	17.86	13.33	14.04	13.79	16.36
HyE0087.72	24.68	27.54	25	24.36	26.03	16.05	24.32	24.66	24.32	24.66	21.74	19.75	21.92	22.78	24	24.66	26.58	28.77	27.63	24.39	21.92	21.69	23.29	25.71	26.09	24.05	24.66	16.25	19.4	17.81	27.14	26.03	27.94	20	19.18	19.28	19.05	21.92	17.44	21.43	20.55	20.99	21.92	13.95	18.18	17.65	19.18	19.18	16.46
[truncated: 104 more columns]
