# Supplementary material for: The genome of the colonial hydroid Hydractinia reveals that their stem cells use a toolkit of evolutionarily shared genes with all animals
Source: Genome Res. 2024 Mar;34(3):498–513. doi: 10.1101/gr.278382.123 (PMC11067881; doi:10.1101/gr.278382.123)
Supplement: Supplement 6 [file Supplemental_Table_S29.xlsx]

## Sheet: TableS31_marker_genes_for_annot
Cluster #(s)	Annotated Cell Type	Marker Genes	Marker Gene ID	Rationale	References
10/12/16	Nematoblasts	Ncol1	HyS0008.263	Well-known nematogenesis marker in Cnidaria.	David et al. 2008 Bradshaw et al. 2015
10/12/16	Nematoblasts	Nematogalectin B	HyS0002.281	Hwang et al. 2010 show that the Nematogalectin B protein is detected in different types of nematocytes using immunohistochemistry; throughout desmonemes development, while only in early differentiating stenoteles and isorhiza. The Hydra and Hydractinia scRNA-seq atlas' suggest the mRNA of this gene is expressed in a majority of nematoblasts.	Hwang et al. 2010 Siebert et al. 2019
10/12/16	Nematoblasts	PaxA	HyS0020.163	A described nematogenesis marker in Nematostella.	Babonis et al. 2017
6/10	Nematoblasts - Early	NR2E1	HyS0022.107	Siebert et al. 2019 show that it has differential expression in their nematoblast clusters.	Siebert et al. 2019
6/10	Nematoblasts - Early	zinc finger protein 16-like	HyS0038.46	Predicted by comparing scRNA-seq expression in Hydra (t7220aep) and Hydractinia.	Siebert et al. 2019
12/16	Nematoblasts - Late	Dickkopf related-protein 3-like	HyS0056.50	Found in late differenciation stage nematoblasts in Hydra.	Fedders et al. 2004 Siebert et al. 2019
12/16	Nematoblasts - Late	Nowa	HyS0034.100	Found in late differenciation stage nematoblasts in Hydra.	Engel et al. 2002 Siebert et al. 2019
12/16	Nematoblasts - Late	ZN333	HyS0022.163	Siebert et al. 2019 show that it has differential expression in their later stage nematoblast clusters.	Siebert et al. 2019
2/5/9	Nematocytes - Body Column	arrestin domain-containing protein 2-like	HyS0042.80	Uncharacterized ARSTNd2-like marker that has specific nematocyte cluster expression in the Hydra and Hydractinia single-cell atlases.	Siebert et al. 2019
8/9	Nematocytes - Tentacles	Nematocilin A	HyS0030.203	A described marker gene for mature nematocytes in Hydra.	Hwang et al. 2007
17	Gland Cells - Mucous Gland Cells	HyTSR1	HyS0013.62	A described marker gene for granular mucous gland cells (gMGC) in Hydra.	Siebert et al. 2008 Siebert et al. 2019
17	Gland Cells - Mucous Gland Cells	Muc2	HyS0004.446	A marker gene for granular and spumous mucous gland cells in Hydra.	Siebert et al. 2019
15	Gland Cells - Zymogen Gland Cells	Chitinase 1	HyS0041.99	A described marker gene for zymogen gland cells (ZMG) in the endoepithelial layer of the body column of Hydra and gland cells in the gut of Nematostella.	Klug et al. 1984 Sebé-Pedrós et al. 2018 Siebert et al. 2019
15	Gland Cells - Zymogen Gland Cells	Dickkopf 1/2/4 A	HyS0006.308	A described marker gene for zymogen gland cells (ZMG) in the endoepithelial layer of Hydra.	Guder et al. 2006 Augustin et al. 2006 Siebert et al. 2019
15	Gland Cells - Zymogen Gland Cells	Dickkopf 1/2/4 C	HyS0001.421	A described marker gene for zymogen gland cells (ZMG) in the endoepithelial layer of Hydra.	Guder et al. 2006 Augustin et al. 2006 Siebert et al. 2019
11	Neuronal Cells	ELAV	HyS0085.53	A marker for neurons progenitors and neurons in Hydra and Nemtostella.	Nakanishi et al. 2012 Siebert et al. 2019
11	Neuronal Cells	Innexin 2	HyS0034.187	Expressed in ganglion neuron cells in the ectoepithlial layer of Hydra in the lower body column.	Takaku et al. 2014
11	Neuronal Cells	LW-amide	HyS0009.155	Expressed in neurons in Hydractinia.	Gajewski et al. 1996
11	Neuronal Cells	Hippocalcin-like	HyS0034.90	A neuronal calcium-binding protein that belongs to the neuronal calcium sensor (NCS) family of proteins	Jacobs et al. 2007
11	Neuronal Cells	Rfamide	HyS0013.338	Expressed in a a subset of differentiated neurons in embryonic and adult stages in Hydractinia.	Katsukura et al. 2003 Chrysostomou et al. 2022
6/7	I-Cells	GNL3	HyS0059.86	Described Hydractinia i-cell marker.	Quiroga-Artigas et al. 2022
6/7	I-Cells	PCNA	HyS0061.60	Planarian proliferating cell and stem cell (neoblast) marker.	Orii et al. 2005 Zeng et al. 2018
6/7	I-Cells	Piwi1	HyS0050.7	Described Hydractinia i-cell marker.	Bradshaw et al. 2015
6/7	I-Cells	Polynem	HyS0098.14	Described Hydractinia i-cell marker.	Bradshaw et al. 2015
6/7	I-Cells	Vasa	HyS0036.89	Described Hydractinia i-cell marker.	Bradshaw et al. 2015
7	I-Cells - Multipotent Germ Cells	H2B3/4	HyS0003.566	Described Hydractinia germ cell marker.	Török et al. 2016 DuBuc et al. 2020
1/4/7	Spermatogenesis Germ Cells - Early	Spermatogenesis 1	HyS0027.170	Shown to be expressed in the testes of male Hydra.	Siebert et al. 2019
1/4	Spermatogenesis Germ Cells - Early	Spermatogenesis 2	HyS0070.46	Shown to be expressed in the testes of male Hydra.	Siebert et al. 2019
4/7	Spermatogenesis Germ Cells - Early	SYCP1	HyS4524.1	A described Hydra spermatogenesis marker that labels the testes of male Hydra.	Fraune et al. 2012 Siebert et al. 2019
0/1	Spermatogenesis Germ Cells - Late	ODF3A	HyS0007.253	A putative sperm tailprotein that was shown to be expressed towards the end of the Hydra male germ cell trajectory.	Siebert et al. 2019
0	Spermatogenesis Germ Cells - Late	SLC9A10	HyS0001.110	A descibed gene required for male fertility and sperm motility in mice.	Wang et al. 2003
3	Epithelial Cells	Wnt5	HyS0017.253	Shown to be expressed in the oral epithelial cells of Hydra and in the eipdermal cells of the oral end of Hydractinia larvae.	Philipp et al. 2009 Stumpf et al. 2010
3/13/14	Epithelial Cells	XP_002156977.1	HyS0009.77	An uncharacterized marker that was expressed in all endodermal lineages and the ectodermal basal disc cells from the Hydra single-cell atlas.	Siebert et al. 2019
13/14	Epithelial Cells	Innexin 5	HyS0020.43	Expressed in ectodermal epithelial cells in Hydra	Buzgariu et al. 2015
3	Epithelial Cells	COL4A6A	HyS0083.18	Putative marker for epitheliomuscular cells in planarians.	Fincher et al. 2018
3	Epithelial Cells	hea3	HyS0078.51	A described gene expressed in the endoderm in the tentacle buds of developing Hydractinia polyps.	Möhrlen et al. 2006
3	Epithelial Cells	Pitx	HyS0010.323	Expressed in endodermal epitheial cells in Hydra.	Watanabe et al. 2014 Siebert et al. 2019
Refrences
David, C.N., Özbek, S., Adamczyk, P., Meier, S., Pauly, B., Chapman, J., Hwang, J.S., Gojobori, T., Holstein, T.W., 2008. Evolution of complex structures: minicollagens shape the cnidarian nematocyst. Trends in Genetics 24, 431–438.
Bradshaw, B., Thompson, K., Frank, U., 2015. Distinct mechanisms underlie oral vs aboral regeneration in the cnidarian Hydractinia echinata. eLife 4, e05506.
J. S. Hwang, Y. Takaku, T. Momose, P. Adamczyk, S. Özbek, K. Ikeo, K. Khalturin, G. Hemmrich, T. C. G. Bosch, T. W. Holstein, C. N. David, T. Gojobori, Nematogalectin, a nematocyst protein with GlyXY and galectin domains, demonstrates nematocyte-specific alternative splicing in Hydra. Proceedings of the National Academy of Sciences. 107, 18539–18544 (2010).
Siebert, S., Farrell, J.A., Cazet, J.F., Abeykoon, Y., Primack, A.S., Schnitzler, C.E., Juliano, C.E., 2019. Stem cell differentiation trajectories in Hydra resolved at single-cell resolution. Science 365, eaav9314.
L. S. Babonis, M. Q. Martindale, PaxA, but not PaxC, is required for cnidocyte development in the sea anemone Nematostella vectensis. EvoDevo. 8, 14 (2017).
H. Fedders, R. Augustin, T. C. G. Bosch, A Dickkopf-3-related gene is expressed in differentiating nematocytes in the basal metazoan Hydra. Dev Genes Evol. 214, 72–80 (2004).
U. Engel, S. Oezbek, R. Engel, B. Petri, F. Lottspeich, T. W. Holstein, Nowa, a novel protein with minicollagen Cys-rich domains, is involved in nematocyst formation in Hydra. Journal of Cell Science. 115, 3923–3934 (2002).
Hwang, J.S., Ohyanagi, H., Hayakawa, S., Osato, N., Nishimiya-Fujisawa, C., Ikeo, K., David, C.N., Fujisawa, T., Gojobori, T., 2007. The evolutionary emergence of cell type-specific genes inferred from the gene expression analysis of Hydra. Proceedings of the National Academy of Sciences 104, 14735–14740.
Siebert, Stefan. Towards an understanding of molecular mechanisms controlling gland cell behaviour in Hydra. Diss. Christian-Albrechts Universität Kiel, 2008.
M. Klug, P. Tardent, I. Smid, T. Holstein, Presence and localization of chitinase in Hydra and Podocoryne (Cnidaria, Hydrozoa). Journal of Experimental Zoology. 229, 69–72 (1984).
A. Sebé-Pedrós, B. Saudemont, E. Chomsky, F. Plessier, M.-P. Mailhé, J. Renno, Y. Loe-Mie, A. Lifshitz, Z. Mukamel, S. Schmutz, S. Novault, P. R. H. Steinmetz, F. Spitz, A. Tanay, H. Marlow, Cnidarian Cell Type Diversity and Regulation Revealed by Whole-Organism Single-Cell RNA-Seq. Cell. 173, 1520-1534.e20 (2018).
C. Guder, S. Pinho, T. G. Nacak, H. A. Schmidt, B. Hobmayer, C. Niehrs, T. W. Holstein, An ancient Wnt-Dickkopf antagonism in Hydra. Development. 133, 901–911 (2006).
R. Augustin, A. Franke, K. Khalturin, R. Kiko, S. Siebert, G. Hemmrich, T. C. G. Bosch, Dickkopf related genes are components of the positional value gradient in Hydra. Developmental Biology. 296, 62–70 (2006).
N. Nakanishi, E. Renfer, U. Technau, F. Rentzsch, Nervous systems of the sea anemone Nematostella vectensis are generated by ectoderm and endoderm and shaped by distinct mechanisms. Development. 139, 347–357 (2012).
Y. Takaku, J. S. Hwang, A. Wolf, A. Böttger, H. Shimizu, C. N. David, T. Gojobori, Innexin gap junctions in nerve cells coordinate spontaneous contractile behavior in Hydra polyps. Sci Rep. 4, 3573 (2014).
M. Gajewski, T. Leitz, J. Schloßherr, G. Plickert, LWamides from Cnidaria constitute a novel family of neuropeptides with morphogenetic activity. Roux’s Arch Dev Biol. 205, 232–242 (1996).
D. K. Jacobs, N. Nakanishi, D. Yuan, A. Camara, S. A. Nichols, V. Hartenstein, Evolution of sensory structures in basal metazoa. Integrative and Comparative Biology. 47, 712–723 (2007).
Y. Katsukura, C. N. David, C. J. P. Grimmelikhuijzen, T. Sugiyama, Inhibition of metamorphosis by RFamide neuropeptides in planula larvae of Hydractinia echinata. Dev Genes Evol. 213, 579–586 (2003).
E. Chrysostomou, H. Flici, S. G. Gornik, M. Salinas-Saavedra, J. M. Gahan, E. T. McMahon, K. Thompson, S. Hanley, M. Kincoyne, C. E. Schnitzler, P. Gonzalez, A. D. Baxevanis, U. Frank, A cellular and molecular analysis of SoxB-driven neurogenesis in a cnidarian. eLife. 11, e78793 (2022).
G. Quiroga-Artigas, D. de Jong, C. E. Schnitzler, GNL3 is an evolutionarily conserved stem cell gene influencing cell proliferation, animal growth and regeneration in the hydrozoan Hydractinia. Open Biol. 12, 220120.
H. Orii, T. Sakurai, K. Watanabe, Distribution of the stem cells (neoblasts) in the planarian Dugesia japonica. Dev Genes Evol. 215, 143–157 (2005).
A. Zeng, H. Li, L. Guo, X. Gao, S. McKinney, Y. Wang, Z. Yu, J. Park, C. Semerad, E. Ross, L.-C. Cheng, E. Davies, K. Lei, W. Wang, A. Perera, K. Hall, A. Peak, A. Box, A. Sánchez Alvarado, Prospectively Isolated Tetraspanin+ Neoblasts Are Adult Pluripotent Stem Cells Underlying Planaria Regeneration. Cell. 173, 1593-1608.e20 (2018).
A. Török, P. H. Schiffer, C. E. Schnitzler, K. Ford, J. C. Mullikin, A. D. Baxevanis, A. Bacic, U. Frank, S. G. Gornik, The cnidarian Hydractinia echinata employs canonical and highly adapted histones to pack its DNA. Epigenetics & Chromatin. 9, 36 (2016).
T. Q. DuBuc, C. E. Schnitzler, E. Chrysostomou, E. T. McMahon, Febrimarsa, J. M. Gahan, T. Buggie, S. G. Gornik, S. Hanley, S. N. Barreira, P. Gonzalez, A. D. Baxevanis, U. Frank, Transcription factor AP2 controls cnidarian germ cell induction. Science. 367, 757–762 (2020).
J. Fraune, M. Alsheimer, J.-N. Volff, K. Busch, S. Fraune, T. C. G. Bosch, R. Benavente, Hydra meiosis reveals unexpected conservation of structural synaptonemal complex proteins across metazoans. Proceedings of the National Academy of Sciences. 109, 16588–16593 (2012).
D. Wang, S. M. King, T. A. Quill, L. K. Doolittle, D. L. Garbers, A new sperm-specific Na + /H + Exchanger required for sperm motility and fertility. Nature Cell Biology. 5, 1117–1122 (2003).
I. Philipp, R. Aufschnaiter, S. Özbek, S. Pontasch, M. Jenewein, H. Watanabe, F. Rentzsch, T. W. Holstein, B. Hobmayer, Wnt/β-Catenin and noncanonical Wnt signaling interact in tissue evagination in the simple eumetazoan Hydra. Proceedings of the National Academy of Sciences. 106, 4290–4295 (2009).
M. Stumpf, B. Will, K. Wittig, J. Kasper, B. Fischer, J. Schmich, S. Seipp, T. Leitz, An organizing region in metamorphosing hydrozoan planula larvae - stimulation of axis formation in both larval and in adult tissue. Int. J. Dev. Biol. 54, 795–802 (2010).
W. Buzgariu, S. Al Haddad, S. Tomczyk, Y. Wenger, B. Galliot, Multi-functionality and plasticity characterize epithelial cells in Hydra. Tissue Barriers. 3, e1068908 (2015).
C. T. Fincher, O. Wurtzel, T. de Hoog, K. M. Kravarik, P. W. Reddien, Cell type transcriptome atlas for the planarian Schmidtea mediterranea. Science. 360, eaaq1736 (2018).
F. Möhrlen, M. Maniura, G. Plickert, M. Frohme, U. Frank, Evolution of astacin-like metalloproteases in animals and their function in development. Evolution & Development. 8, 223–231 (2006).
H. Watanabe, H. A. Schmidt, A. Kuhn, S. K. Höger, Y. Kocagöz, N. Laumann-Lipp, S. Özbek, T. W. Holstein, Nodal signalling determines biradial asymmetry in Hydra. Nature. 515, 112–115 (2014).

## Sheet: Legend
Table S29. Marker genes that were used to annotate the H. symbiolongicarpus single cell RNAseq atlas clusters and associated publications.
