# Supplementary material for: The genome of the colonial hydroid Hydractinia reveals that their stem cells use a toolkit of evolutionarily shared genes with all animals
Source: Genome Res. 2024 Mar;34(3):498–513. doi: 10.1101/gr.278382.123 (PMC11067881; doi:10.1101/gr.278382.123)
Supplement: Supplement 7 [file Supplemental_Table_S30.xlsx]

## Sheet: TableS33_sym_Markers_Final
gene	p_val	avg_log2FC	pct.1	pct.2	p_val_adj	Cell Type/State	cluster_number	cluster_id	pannzer_description	pannzer_gene_name	molecular_function	biological_processes	cellular_component	best_BLAST_hit	eval	orthogroup	total_og_size	num_species	cnidaria_specific	medusozoa_specific	hydrozoa_specific	hydracClytia_specific	hydractinia_specific	symbio_specific
HyS0002.356	0	2.55274	0.563	0.036	0	Spermatogenesis	0	sprm_3	NA	NA	NA	NA	NA	XP_028403014.1 testis-expressed protein 43-like [Dendronephthya gigantea]	1.5e-17	OG0008154	25	24	NA	NA	NA	NA	NA	NA
HyS0004.95	8.73e-223	1.39396	0.271	0.041	1.92e-218	Spermatogenesis	0	sprm_3	NA	NA	NA	NA	NA	NA	NA	OG0007408	32	2	YES	YES	YES	YES	YES	NA
HyS0005.341	0	2.63466	0.487	0.03	0	Spermatogenesis	0	sprm_3	NA	NA	NA	NA	NA	NA	NA	Unassigned	NA	NA	NA	NA	NA	NA	NA	NA
HyS0008.306	0	2.48225	0.485	0.047	0	Spermatogenesis	0	sprm_3	Para-aminobenzoate synthase amidotransferase component	NA	transferase activity	glutamine metabolic process	NA	XP_012557892.1 PREDICTED: putative glutamine amidotransferase YLR126C [Hydra vulgaris]	3.8e-41	OG0005251	48	19	NA	NA	NA	NA	NA	NA
HyS0008.366	0	1.80284	0.39	0.042	0	Spermatogenesis	0	sprm_3	NA	NA	NA	NA	NA	XP_022792293.1 probable serine/threonine-protein kinase DDB_G0267514 [Stylophora pistillata]	3.8e-19	OG0021694	3	3	NA	NA	NA	NA	NA	NA
HyS0008.369	0	2.24529	0.47	0.039	0	Spermatogenesis	0	sprm_3	Calcium dependent protein kinase2	NA	protein kinase activity	protein phosphorylation	centriole	CCI40863.1 unnamed protein product [Albugo candida]	1.3e-49	OG0000155	443	49	NA	NA	NA	NA	NA	NA
HyS0009.283	0	1.86136	0.342	0.037	0	Spermatogenesis	0	sprm_3	NA	NA	NA	NA	NA	NA	NA	Unassigned	NA	NA	NA	NA	NA	NA	NA	NA
HyS0014.303	0	1.68356	0.317	0.017	0	Spermatogenesis	0	sprm_3	NA	NA	NA	NA	NA	NA	NA	Unassigned	NA	NA	NA	NA	NA	NA	NA	NA
HyS0016.108	0	2.00991	0.419	0.038	0	Spermatogenesis	0	sprm_3	Microtubule-associated protein RP/EB family member 1	NA	calcium ion binding	proteasome-mediated ubiquitin-dependent protein catabolic process	Cul4-RING E3 ubiquitin ligase complex	KXJ22876.1 WD repeat-containing protein on Y chromosome [Exaiptasia pallida]	8.8e-239	OG0000569	179	39	NA	NA	NA	NA	NA	NA
HyS0018.243	0	2.24163	0.465	0.027	0	Spermatogenesis	0	sprm_3	NA	NA	NA	NA	NA	XP_022793004.1 uncharacterized protein LOC111332008 [Stylophora pistillata]	7.3e-13	OG0008248	24	17	NA	NA	NA	NA	NA	NA
HyS0019.220	0	1.74769	0.314	0.029	0	Spermatogenesis	0	sprm_3	NA	NA	NA	NA	NA	NA	NA	Unassigned	NA	NA	NA	NA	NA	NA	NA	NA
HyS0021.210	0	3.0029	0.681	0.043	0	Spermatogenesis	0	sprm_3	NA	NA	NA	NA	NA	XP_020629597.1 uncharacterized protein LOC110066695 isoform X2 [Orbicella faveolata]	1.4e-36	OG0008260	24	22	NA	NA	NA	NA	NA	NA
HyS0022.194	0	1.84098	0.354	0.021	0	Spermatogenesis	0	sprm_3	leucine-rich repeat-containing protein 74B	NA	calcium ion binding	NA	small-subunit processome	XP_027129994.1 leucine-rich repeat-containing protein 74B-like isoform X1 [Larimichthys crocea]	9.5e-14	OG0000304	290	38	NA	NA	NA	NA	NA	NA
HyS0022.207	0	2.88556	0.666	0.042	0	Spermatogenesis	0	sprm_3	Voltage-dependent L-type calcium channel subunit alpha	NA	voltage-gated calcium channel activity	calcium ion transmembrane transport	voltage-gated calcium channel complex	AWJ68254.1 putative voltage-dependent calcium channel 2 [Hirudo verbana]	2e-190	OG0000292	300	45	NA	NA	NA	NA	NA	NA
HyS0024.3	0	2.00769	0.364	0.019	0	Spermatogenesis	0	sprm_3	Platelet-activating factor acetylhydrolase IB subunit alpha	SLFNL1	ATP binding	NA	NA	XP_004210341.1 PREDICTED: schlafen-like protein 1 [Hydra vulgaris]	8.2e-52	OG0001222	108	30	NA	NA	NA	NA	NA	NA
HyS0024.45	0	2.57147	0.529	0.027	0	Spermatogenesis	0	sprm_3	Type I phosphodiesterase/nucleotide pyrophosphatase	NA	sulfuric ester hydrolase activity	NA	integral component of membrane	XP_002157149.2 PREDICTED: arylsulfatase B-like [Hydra vulgaris]	9.7e-73	OG0000139	476	40	NA	NA	NA	NA	NA	NA
HyS0029.132	0	2.67505	0.483	0.013	0	Spermatogenesis	0	sprm_3	NA	NA	NA	NA	NA	NA	NA	OG0031551	2	2	YES	YES	YES	YES	YES	NA
HyS0030.214	0	2.29213	0.484	0.033	0	Spermatogenesis	0	sprm_3	Retrovirus-related Pol polyprotein from type-1 retrotransposable element R2	NA	polynucleotide adenylyltransferase activity	RNA polyadenylation	NA	XP_001639691.1 predicted protein [Nematostella vectensis]	1.1e-93	OG0006989	35	33	NA	NA	NA	NA	NA	NA
HyS0032.169	2.77e-298	1.8698	0.336	0.048	6.1e-294	Spermatogenesis	0	sprm_3	Calcium-binding mitochondrial carrier protein SCaMC-1	NA	calcium ion binding	transmembrane transport	mitochondrial inner membrane	XP_012563097.1 PREDICTED: calcium-binding mitochondrial carrier protein SCaMC-1-like [Hydra vulgaris]	5.6e-82	OG0001959	78	48	NA	NA	NA	NA	NA	NA
HyS0034.194	0	2.01461	0.4	0.022	0	Spermatogenesis	0	sprm_3	NA	NA	NA	NA	NA	NA	NA	OG0030985	2	2	YES	YES	YES	YES	YES	NA
HyS0034.80	0	1.82269	0.342	0.031	0	Spermatogenesis	0	sprm_3	Macrophage mannose receptor 1	NA	calcium ion binding	histone H3-K4 methylation	Set1C/COMPASS complex	XP_027056903.1 WD repeat-containing protein on Y chromosome-like [Pocillopora damicornis]	0	OG0000569	179	39	NA	NA	NA	NA	NA	NA
HyS0039.49	0	3.10071	0.716	0.047	0	Spermatogenesis	0	sprm_3	Testis-specific serine/threonine-protein kinase	NA	protein kinase activity	protein phosphorylation	nucleus	XP_027058624.1 NUAK family SNF1-like kinase 1 [Pocillopora damicornis]	3.8e-106	OG0000725	152	37	NA	NA	NA	NA	NA	NA
HyS0040.172	0	4.06402	0.825	0.049	0	Spermatogenesis	0	sprm_3	NA	NA	NA	NA	NA	NA	NA	OG0031146	2	2	YES	YES	YES	YES	YES	NA
HyS0041.141	0	1.96682	0.432	0.048	0	Spermatogenesis	0	sprm_3	NA	NA	NA	NA	NA	NA	NA	Unassigned	NA	NA	NA	NA	NA	NA	NA	NA
HyS0042.46	0	3.11064	0.63	0.044	0	Spermatogenesis	0	sprm_3	HDNR domain-containing protein	NA	NA	NA	NA	XP_020623717.1 testis-expressed protein 36-like [Orbicella faveolata]	4.7e-29	OG0008091	25	24	NA	NA	NA	NA	NA	NA
HyS0048.93	0	3.44742	0.761	0.044	0	Spermatogenesis	0	sprm_3	NA	NA	NA	NA	NA	NA	NA	OG0030993	2	2	YES	YES	YES	YES	YES	NA
HyS0050.20	0	2.01834	0.391	0.024	0	Spermatogenesis	0	sprm_3	Iron-sulfur cluster co-chaperone protein HscB, mitochondrial	NA	calcium ion binding	positive regulation of ATPase activity	NA	XP_020618811.1 troponin C-like [Orbicella faveolata]	3.8e-41	OG0000027	1167	49	NA	NA	NA	NA	NA	NA
HyS0053.105	0	2.98178	0.676	0.04	0	Spermatogenesis	0	sprm_3	NA	NA	NA	NA	NA	XP_020913651.1 prominin-1-A-like isoform X1 [Exaiptasia pallida]	5.3e-39	OG0021368	3	3	YES	YES	NA	NA	NA	NA
HyS0056.78	0	2.68437	0.6	0.044	0	Spermatogenesis	0	sprm_3	NA	NA	NA	NA	NA	XP_012555082.1 PREDICTED: WD repeat-containing protein 87-like, partial [Hydra vulgaris]	5.8e-160	OG0001721	85	36	NA	NA	NA	NA	NA	NA
HyS0057.46	0	2.44242	0.486	0.015	0	Spermatogenesis	0	sprm_3	NA	NA	NA	NA	NA	XP_012559677.1 PREDICTED: potassium/sodium hyperpolarization-activated cyclic nucleotide-gated channel 1-like [Hydra vulgaris]	3.5e-12	OG0000685	158	40	NA	NA	NA	NA	NA	NA
HyS0057.48	0	3.22409	0.742	0.047	0	Spermatogenesis	0	sprm_3	Hyperpolarization-gated and cyclic nucleotide regulated channel	NA	ion channel activity	potassium ion transmembrane transport	HCN channel complex	KGM00411.1 Potassium/sodium hyperpolarization-activated cyclic nucleotide-gated channel 2, partial [Charadrius vociferus]	1e-60	OG0000685	158	40	NA	NA	NA	NA	NA	NA
HyS0059.88	0	1.65646	0.339	0.044	0	Spermatogenesis	0	sprm_3	NA	NA	NA	NA	NA	NA	NA	OG0030683	2	2	YES	YES	YES	YES	YES	NA
HyS0062.84	0	2.75336	0.609	0.039	0	Spermatogenesis	0	sprm_3	NA	NA	NA	NA	NA	XP_027046306.1 uncharacterized protein C5orf49 homolog [Pocillopora damicornis]	5.6e-35	OG0003470	58	34	NA	NA	NA	NA	NA	NA
HyS0076.15	1.86e-271	1.52578	0.273	0.028	4.1e-267	Spermatogenesis	0	sprm_3	NA	NA	NA	NA	NA	NA	NA	Unassigned	NA	NA	NA	NA	NA	NA	NA	NA
HyS0076.18	3.35e-307	1.62759	0.316	0.035	7.39e-303	Spermatogenesis	0	sprm_3	NA	NA	NA	NA	NA	NA	NA	Unassigned	NA	NA	NA	NA	NA	NA	NA	NA
HyS0077.27	0	2.06934	0.438	0.045	0	Spermatogenesis	0	sprm_3	OTU domain-containing protein 5-A	OTUD5	thiol-dependent ubiquitin-specific protease activity	protein deubiquitination	voltage-gated potassium channel complex	XP_002159374.2 PREDICTED: OTU domain-containing protein 5-like [Hydra vulgaris]	1.1e-87	OG0004729	50	39	NA	NA	NA	NA	NA	NA
HyS0078.77	0	2.16091	0.464	0.04	0	Spermatogenesis	0	sprm_3	Disintegrin and metalloproteinase domain-containing protein 19	NA	metalloendopeptidase activity	integrin-mediated signaling pathway	extracellular region	XP_027760927.1 disintegrin and metalloproteinase domain-containing protein 28 [Empidonax traillii]	2.7e-73	OG0000322	280	43	NA	NA	NA	NA	NA	NA
HyS0086.7	0	3.9129	0.813	0.04	0	Spermatogenesis	0	sprm_3	NA	NA	NA	NA	NA	XP_002607865.1 hypothetical protein BRAFLDRAFT_117274 [Branchiostoma floridae]	4.6e-12	OG0011697	10	8	NA	NA	NA	NA	NA	NA
HyS0091.38	1.98e-248	1.45463	0.289	0.04	4.37e-244	Spermatogenesis	0	sprm_3	NA	NA	NA	NA	NA	NA	NA	OG0031280	2	2	YES	YES	YES	YES	YES	NA
HyS0093.21	0	2.98831	0.652	0.032	0	Spermatogenesis	0	sprm_3	Cyclic nucleotide-binding domain-containing protein 2	NA	NA	NA	NA	XP_027057325.1 cAMP-dependent protein kinase regulatory subunit-like [Pocillopora damicornis]	1.1e-95	OG0000408	229	37	NA	NA	NA	NA	NA	NA
HyS0479.2	0	3.13207	0.715	0.043	0	Spermatogenesis	0	sprm_3	NA	NA	NA	NA	NA	XP_020629597.1 uncharacterized protein LOC110066695 isoform X2 [Orbicella faveolata]	1.4e-36	OG0008260	24	22	NA	NA	NA	NA	NA	NA
HyS1569.2	0	2.21567	0.46	0.03	0	Spermatogenesis	0	sprm_3	NA	NA	NA	NA	NA	XP_022793004.1 uncharacterized protein LOC111332008 [Stylophora pistillata]	7.3e-13	OG0008248	24	17	NA	NA	NA	NA	NA	NA
HyS2687.1	1.24e-276	1.62376	0.301	0.041	2.73e-272	Spermatogenesis	0	sprm_3	NA	NA	NA	NA	NA	XP_020913918.1 protein FAM166B-like [Exaiptasia pallida]	1.9e-64	OG0001713	85	37	NA	NA	NA	NA	NA	NA
HyS0004.31	0	2.72508	0.652	0.029	0	Spermatogenesis	1	sprm_2	NA	NA	NA	NA	NA	XP_002154515.2 PREDICTED: F-box/LRR-repeat protein 20-like [Hydra vulgaris]	5.9e-123	OG0000461	212	45	NA	NA	NA	NA	NA	NA
HyS0007.18	0	1.59712	0.402	0.044	0	Spermatogenesis	1	sprm_2	NA	NA	NA	NA	NA	XP_004210476.2 PREDICTED: uncharacterized protein LOC101240632 [Hydra vulgaris]	4.4e-221	OG0010516	13	11	YES	NA	NA	NA	NA	NA
HyS0008.347	0	1.34709	0.327	0.022	0	Spermatogenesis	1	sprm_2	Cyclic nucleotide-binding domain-containing protein 2	CNBD2	cAMP binding	spermatogenesis	cytosol	XP_012562331.1 PREDICTED: cyclic nucleotide-binding domain-containing protein 2-like [Hydra vulgaris]	1.7e-121	OG0000408	229	37	NA	NA	NA	NA	NA	NA
HyS0010.247	0	1.89041	0.477	0.041	0	Spermatogenesis	1	sprm_2	NA	NA	NA	NA	NA	XP_023361387.1 ankyrin repeat domain-containing protein 26-like, partial [Sarcophilus harrisii]	1.1e-11	OG0007254	33	12	NA	NA	NA	NA	NA	NA
HyS0017.21	0	1.68921	0.453	0.044	0	Spermatogenesis	1	sprm_2	Cyclin-dependent kinase catalytic subunit	NA	protein serine/threonine kinase activity	protein phosphorylation	cyclin-dependent protein kinase holoenzyme complex	XP_002162867.1 PREDICTED: cyclin-dependent kinase 1-like [Hydra vulgaris]	4.6e-158	OG0000161	436	49	NA	NA	NA	NA	NA	NA
HyS0017.269	7.7e-279	1.34814	0.339	0.047	1.7e-274	Spermatogenesis	1	sprm_2	NA	NA	NA	NA	NA	XP_012558748.1 PREDICTED: uncharacterized protein LOC100206968 [Hydra vulgaris]	1.9e-73	OG0001121	114	45	NA	NA	NA	NA	NA	NA
HyS0018.223	1.77e-211	1.11826	0.281	0.042	3.89e-207	Spermatogenesis	1	sprm_2	Calcium responsive transcription factor	CARF	DNA-binding transcription factor activity	positive regulation of transcription from RNA polymerase II promoter in response to calcium ion	granular component	KXJ08228.1 Calcium-responsive transcription factor [Exaiptasia pallida]	1.7e-67	OG0006849	36	30	NA	NA	NA	NA	NA	NA
HyS0021.98	0	2.04169	0.365	0.023	0	Spermatogenesis	1	sprm_2	NA	NA	NA	NA	NA	XP_002154341.1 PREDICTED: F-box only protein 43-like [Hydra vulgaris]	4.9e-52	OG0011564	10	9	NA	NA	NA	NA	NA	NA
HyS0022.242	0	1.58616	0.356	0.02	0	Spermatogenesis	1	sprm_2	NA	NA	NA	NA	NA	XP_027049319.1 uncharacterized protein LOC113676808 [Pocillopora damicornis]	1.5e-13	OG0011212	11	9	YES	NA	NA	NA	NA	NA
HyS0024.164	0	1.40016	0.387	0.042	0	Spermatogenesis	1	sprm_2	NA	NA	NA	NA	NA	NA	NA	OG0012881	8	6	YES	YES	NA	NA	NA	NA
HyS0028.36	0	1.87226	0.439	0.033	0	Spermatogenesis	1	sprm_2	NA	NA	NA	NA	NA	XP_012560650.1 PREDICTED: uncharacterized protein LOC101240880 [Hydra vulgaris]	1.2e-148	OG0010236	14	10	YES	NA	NA	NA	NA	NA
HyS0033.68	0	1.06773	0.255	0.013	0	Spermatogenesis	1	sprm_2	Mitochondrial basic amino acids transporter	NA	transmembrane transporter activity	transmembrane transport	integral component of membrane	XP_006001557.1 PREDICTED: mitochondrial basic amino acids transporter isoform X1 [Latimeria chalumnae]	2.9e-80	OG0000330	276	49	NA	NA	NA	NA	NA	NA
HyS0043.26	6.3e-264	1.24871	0.312	0.04	1.39e-259	Spermatogenesis	1	sprm_2	Nephrocystin-1 (Fragment)	NA	NA	NA	NA	XP_004205553.2 PREDICTED: nephrocystin-1-like [Hydra vulgaris]	8.8e-186	OG0003166	60	39	NA	NA	NA	NA	NA	NA
HyS0083.48	0	1.63128	0.418	0.024	0	Spermatogenesis	1	sprm_2	Homeobox domain-containing protein (Fragment)	NA	sequence-specific DNA binding	regulation of transcription, DNA-templated	nucleus	XP_024510821.1 Homeobox domain and Paired domain and Homeodomain-like and Winged helix-turn-helix DNA-binding domain-containing protein [Strongyloides ratti]	1.7e-05	OG0031580	2	2	YES	YES	YES	YES	YES	NA
HyS0137.4	0	1.56247	0.377	0.029	0	Spermatogenesis	1	sprm_2	NA	NA	NA	NA	NA	NA	NA	Unassigned	NA	NA	NA	NA	NA	NA	NA	NA
HyS0396.3	3.39e-205	1.17358	0.293	0.047	7.48e-201	Spermatogenesis	1	sprm_2	NA	NA	NA	NA	NA	NA	NA	OG0000878	132	44	NA	NA	NA	NA	NA	NA
HyS0742.3	0	1.44258	0.411	0.041	0	Spermatogenesis	1	sprm_2	Homeobox domain-containing protein (Fragment)	NA	sequence-specific DNA binding	regulation of transcription, DNA-templated	nucleus	XP_016062428.1 PREDICTED: pituitary homeobox 2 [Miniopterus natalensis]	1.1e-09	OG0000038	1037	47	NA	NA	NA	NA	NA	NA
HyS1185.3	0	1.51583	0.356	0.027	0	Spermatogenesis	1	sprm_2	NA	NA	NA	NA	NA	XP_023361387.1 ankyrin repeat domain-containing protein 26-like, partial [Sarcophilus harrisii]	1.1e-11	OG0007254	33	12	NA	NA	NA	NA	NA	NA
HyS0001.381	0	2.07091	0.505	0.035	0	Nematocytes	2	nem_2	NA	NA	NA	NA	NA	AFU11398.1 allorecognition 2, partial [Hydractinia symbiolongicarpus]	0.00011	OG0030716	2	2	YES	YES	YES	YES	YES	NA
HyS0001.466	0	2.06766	0.426	0.032	0	Nematocytes	2	nem_2	Putative zinc/iron transporter (inferred by orthology to a S. mansoni protein)	NA	metal ion transmembrane transporter activity	metal ion transport	integral component of membrane	XP_012556761.1 PREDICTED: zinc transporter ZIP1-like [Hydra vulgaris]	4.2e-41	OG0000773	144	44	NA	NA	NA	NA	NA	NA
HyS0001.535	0	2.1531	0.434	0.02	0	Nematocytes	2	nem_2	NA	NA	NA	NA	NA	XP_012563701.1 PREDICTED: somatostatin receptor type 5-like [Hydra vulgaris]	6.5e-72	OG0000966	126	13	NA	NA	NA	NA	NA	NA
HyS0001.638	0	1.50569	0.495	0.034	0	Nematocytes	2	nem_2	interstitial collagenase	MMP2	metalloendopeptidase activity	collagen catabolic process	extracellular matrix	XP_012566011.1 PREDICTED: 72 kDa type IV collagenase-like [Hydra vulgaris]	3.5e-57	OG0000099	579	41	NA	NA	NA	NA	NA	NA
HyS0001.705	1.57e-206	1.25195	0.255	0.02	3.45e-202	Nematocytes	2	nem_2	NA	NA	NA	NA	NA	NA	NA	OG0030948	2	2	YES	YES	YES	YES	YES	NA
HyS0002.289	0	2.45243	0.495	0.034	0	Nematocytes	2	nem_2	Thrombospondin-1	NA	extracellular matrix binding	negative regulation of angiogenesis	extracellular space	XP_012556506.1 PREDICTED: uncharacterized protein LOC100199700 [Hydra vulgaris]	1.5e-127	OG0000083	620	22	NA	NA	NA	NA	NA	NA
HyS0002.514	0	1.46712	0.285	0.013	0	Nematocytes	2	nem_2	NA	NA	NA	NA	NA	XP_012558142.1 PREDICTED: uncharacterized protein LOC105845210 [Hydra vulgaris]	1.6e-47	OG0000195	391	44	NA	NA	NA	NA	NA	NA
HyS0002.517	3.31e-272	1.42856	0.285	0.017	7.3e-268	Nematocytes	2	nem_2	SERINE THERONINE PROTEIN KINASE	NEK6	protein serine/threonine kinase activity	protein phosphorylation	centrosome	XP_002157973.3 PREDICTED: serine/threonine-protein kinase Nek7-like [Hydra vulgaris]	4.9e-130	OG0000134	483	48	NA	NA	NA	NA	NA	NA
HyS0003.113	0	1.9732	0.478	0.033	0	Nematocytes	2	nem_2	NA	NA	NA	NA	NA	NA	NA	OG0031109	2	2	YES	YES	YES	YES	YES	NA
HyS0004.198	1.03e-213	1.33441	0.278	0.024	2.26e-209	Nematocytes	2	nem_2	D-amino-acid oxidase	NA	D-amino-acid oxidase activity	D-amino acid metabolic process	lipid droplet	XP_012557616.1 PREDICTED: D-amino-acid oxidase-like [Hydra vulgaris]	1.7e-65	OG0000803	140	45	NA	NA	NA	NA	NA	NA
HyS0004.231	1.7e-233	1.5789	0.376	0.045	3.76e-229	Nematocytes	2	nem_2	Bifunctional aspartokinase homoserine dehydrogenase chloroplastic-like	NA	cellulose binding	cellulose catabolic process	extracellular region	XP_004211747.1 PREDICTED: cell wall protein PRY3-like [Hydra vulgaris]	1.4e-89	OG0000074	641	44	NA	NA	NA	NA	NA	NA
HyS0005.155	0	2.35425	0.492	0.03	0	Nematocytes	2	nem_2	Gelsolin, cytoplasmic (Fragment)	NA	actin filament binding	cytoskeleton organization	NA	XP_012555358.1 PREDICTED: advillin [Hydra vulgaris]	3.8e-153	OG0000283	305	48	NA	NA	NA	NA	NA	NA
HyS0006.154	7.4e-299	1.57505	0.305	0.017	1.63e-294	Nematocytes	2	nem_2	NA	NA	NA	NA	NA	XP_012555041.1 PREDICTED: uncharacterized protein LOC100209306 [Hydra vulgaris]	1.7e-51	OG0000658	163	21	NA	NA	NA	NA	NA	NA
HyS0008.232	1.23e-270	1.84348	0.4	0.044	2.71e-266	Nematocytes	2	nem_2	Mothers against decapentaplegic homolog	NA	DNA-binding transcription factor activity	transforming growth factor beta receptor signaling pathway	transcription factor complex	XP_002164264.2 PREDICTED: uncharacterized protein LOC100199160 [Hydra vulgaris]	1.1e-247	OG0001955	78	42	NA	NA	NA	NA	NA	NA
HyS0010.296	0	2.18592	0.452	0.037	0	Nematocytes	2	nem_2	A disintegrin and metalloproteinase with thrombospondin motifs 18	NA	endopeptidase activity	proteolysis	membrane attack complex	XP_012554453.1 PREDICTED: uncharacterized protein LOC100197582 isoform X1 [Hydra vulgaris]	5.7e-130	OG0000083	620	22	NA	NA	NA	NA	NA	NA
HyS0010.37	1.36e-301	2.50464	0.388	0.034	3e-297	Nematocytes	2	nem_2	Phosphonoacetaldehyde hydrolase	PHNX	phosphonoacetaldehyde hydrolase activity	organic phosphonate catabolic process	mitochondrion	XP_002157653.1 PREDICTED: uncharacterized protein LOC100197207 [Hydra vulgaris]	3.9e-134	OG0007656	29	22	NA	NA	NA	NA	NA	NA
HyS0012.109	1.8e-218	1.41192	0.285	0.024	3.97e-214	Nematocytes	2	nem_2	NA	NA	NA	NA	NA	OLL25419.1 Calmodulin [Neolecta irregularis DAH-3]	2e-18	OG0023644	3	3	YES	NA	NA	NA	NA	NA
HyS0012.253	0	2.32431	0.559	0.043	0	Nematocytes	2	nem_2	NA	NA	NA	NA	NA	NA	NA	OG0031115	2	2	YES	YES	YES	YES	YES	NA
HyS0012.273	0	2.52714	0.627	0.043	0	Nematocytes	2	nem_2	NA	NA	NA	NA	NA	XP_020910241.1 trichohyalin-like [Exaiptasia pallida]	8.9e-15	OG0031119	2	2	YES	YES	YES	YES	YES	NA
HyS0013.282	1.12e-220	1.4172	0.284	0.023	2.48e-216	Nematocytes	2	nem_2	NA	NA	NA	NA	NA	RMX43523.1 hypothetical protein pdam_00001927 [Pocillopora damicornis]	4.7e-59	OG0000037	1047	39	NA	NA	NA	NA	NA	NA
HyS0014.296	2.54e-242	1.49919	0.307	0.026	5.61e-238	Nematocytes	2	nem_2	NA	NA	NA	NA	NA	PFX21921.1 hypothetical protein AWC38_SpisGene13578 [Stylophora pistillata]	1.4e-09	OG0006896	36	15	YES	NA	NA	NA	NA	NA
HyS0019.243	0	2.101	0.539	0.048	0	Nematocytes	2	nem_2	NA	NA	NA	NA	NA	XP_002154502.2 PREDICTED: calmodulin-A-like [Hydra vulgaris]	7.7e-42	OG0008942	20	8	YES	YES	NA	NA	NA	NA
HyS0020.209	1.72e-255	1.68927	0.389	0.043	3.78e-251	Nematocytes	2	nem_2	NA	NA	NA	NA	NA	XP_012555342.1 PREDICTED: NACHT, LRR and PYD domains-containing protein 3-like [Hydra vulgaris]	4.6e-39	OG0000055	852	24	NA	NA	NA	NA	NA	NA
HyS0022.244	0	2.72638	0.666	0.043	0	Nematocytes	2	nem_2	NA	NA	NA	NA	NA	NA	NA	OG0031381	2	2	YES	YES	YES	YES	YES	NA
HyS0022.94	0	2.39858	0.493	0.029	0	Nematocytes	2	nem_2	NA	NA	NA	NA	NA	NA	NA	OG0018450	4	4	NA	NA	NA	NA	NA	NA
HyS0024.135	0	1.87995	0.438	0.042	0	Nematocytes	2	nem_2	NA	NA	NA	NA	NA	NA	NA	OG0012827	8	7	YES	YES	NA	NA	NA	NA
HyS0024.67	1.41e-282	1.66173	0.371	0.033	3.12e-278	Nematocytes	2	nem_2	Potassium voltage gated channel protein Shaker	NA	voltage-gated potassium channel activity	protein homooligomerization	voltage-gated potassium channel complex	AAB02603.1 potassium channel homolog [Polyorchis penicillatus]	1.7e-167	OG0000035	1063	46	NA	NA	NA	NA	NA	NA
HyS0026.207	0	2.56817	0.562	0.021	0	Nematocytes	2	nem_2	Voltage-gated potassium channel alpha subunit	KCNC4	voltage-gated potassium channel activity	protein homooligomerization	voltage-gated potassium channel complex	XP_002168332.2 PREDICTED: potassium voltage-gated channel subfamily C member 1-like [Hydra vulgaris]	1e-149	OG0000035	1063	46	NA	NA	NA	NA	NA	NA
HyS0026.210	0	1.7	0.315	0.017	0	Nematocytes	2	nem_2	Neuronal acetylcholine receptor subunit alpha-7	CHRNA7	acetylcholine-gated cation-selective channel activity	excitatory postsynaptic potential	postsynaptic membrane	XP_012562789.1 PREDICTED: neuronal acetylcholine receptor subunit alpha-10-like [Hydra vulgaris]	1.5e-120	OG0000019	1308	40	NA	NA	NA	NA	NA	NA
HyS0026.230	0	2.21199	0.469	0.023	0	Nematocytes	2	nem_2	NA	NA	NA	NA	NA	XP_012562820.1 PREDICTED: uncharacterized protein LOC100201479, partial [Hydra vulgaris]	6.1e-21	OG0008528	23	2	YES	YES	YES	YES	YES	NA
HyS0029.126	0	1.87348	0.427	0.024	0	Nematocytes	2	nem_2	NA	NA	NA	NA	NA	XP_012559901.1 PREDICTED: hemicentin-2-like, partial [Hydra vulgaris]	1.4e-240	OG0000078	632	43	NA	NA	NA	NA	NA	NA
HyS0029.128	1.99e-292	1.69578	0.36	0.029	4.4e-288	Nematocytes	2	nem_2	NA	NA	NA	NA	NA	XP_012559901.1 PREDICTED: hemicentin-2-like, partial [Hydra vulgaris]	2e-58	OG0000078	632	43	NA	NA	NA	NA	NA	NA
HyS0032.81	0	1.93008	0.42	0.03	0	Nematocytes	2	nem_2	NA	NA	NA	NA	NA	NA	NA	OG0022041	3	3	YES	YES	YES	YES	NA	NA
HyS0032.86	0	2.18094	0.47	0.018	0	Nematocytes	2	nem_2	NA	NA	NA	NA	NA	XP_018334139.1 LIM and SH3 domain protein Lasp isoform X1 [Agrilus planipennis]	2.6e-06	OG0031355	2	2	YES	YES	YES	YES	YES	NA
HyS0037.31	0	1.9601	0.414	0.026	0	Nematocytes	2	nem_2	Glutamine amidotransferase	NA	GMP synthase (glutamine-hydrolyzing) activity	glutamine metabolic process	NA	XP_012557892.1 PREDICTED: putative glutamine amidotransferase YLR126C [Hydra vulgaris]	1.2e-42	OG0005251	48	19	NA	NA	NA	NA	NA	NA
HyS0041.18	6.62e-276	1.42768	0.31	0.02	1.46e-271	Nematocytes	2	nem_2	NA	NA	NA	NA	NA	NA	NA	OG0014109	7	2	YES	YES	YES	YES	YES	NA
HyS0041.66	0	1.98193	0.508	0.04	0	Nematocytes	2	nem_2	NA	NA	NA	NA	NA	NA	NA	OG0031177	2	2	YES	YES	YES	YES	YES	NA
HyS0042.93	0	2.09995	0.453	0.02	0	Nematocytes	2	nem_2	SAM-dependent methyltransferase	NA	methyltransferase activity	methylation	NA	XP_012554811.1 PREDICTED: uncharacterized protein LOC101240403 isoform X1 [Hydra vulgaris]	2.1e-71	OG0000661	162	17	NA	NA	NA	NA	NA	NA
HyS0044.160	2.24e-273	1.6667	0.371	0.034	4.94e-269	Nematocytes	2	nem_2	NA	NA	NA	NA	NA	XP_012554414.1 PREDICTED: echinoderm microtubule-associated protein-like 4 isoform X2 [Hydra vulgaris]	3.1e-201	OG0000488	202	44	NA	NA	NA	NA	NA	NA
HyS0044.163	0	1.94328	0.434	0.037	0	Nematocytes	2	nem_2	Arachidonate 5-lipoxygenase	NA	oxidoreductase activity, acting on single donors with incorporation of molecular oxygen, incorporation of two atoms of oxygen	cellular oxidant detoxification	NA	XP_002156755.3 PREDICTED: arachidonate 5-lipoxygenase-like [Hydra vulgaris]	2.7e-227	OG0000240	339	39	NA	NA	NA	NA	NA	NA
HyS0047.98	0	2.71687	0.67	0.043	0	Nematocytes	2	nem_2	DM domain-containing protein (Fragment)	NA	sequence-specific DNA binding	regulation of transcription, DNA-templated	nucleus	XP_004210658.1 PREDICTED: uncharacterized protein LOC101235288 [Hydra vulgaris]	5.7e-29	OG0000327	278	41	NA	NA	NA	NA	NA	NA
HyS0050.64	0	2.59792	0.519	0.033	0	Nematocytes	2	nem_2	Hemicentin-1	NA	NA	NA	NA	XP_012555066.1 PREDICTED: neuropilin-1a-like isoform X1 [Hydra vulgaris]	9.2e-206	OG0000004	2368	44	NA	NA	NA	NA	NA	NA
HyS0051.159	0	2.21285	0.542	0.043	0	Nematocytes	2	nem_2	NA	NA	NA	NA	NA	XP_012563930.1 PREDICTED: uncharacterized protein LOC101235913 [Hydra vulgaris]	1.1e-09	OG0000582	177	13	NA	NA	NA	NA	NA	NA
HyS0052.111	0	2.13095	0.507	0.034	0	Nematocytes	2	nem_2	Gamma-aminobutyric acid receptor subunit beta-2	NA	GABA-A receptor activity	ion transmembrane transport	plasma membrane	XP_012563985.1 PREDICTED: glycine receptor subunit alpha-2-like [Hydra vulgaris]	8.8e-78	OG0000037	1047	39	NA	NA	NA	NA	NA	NA
HyS0052.120	5.61e-227	1.59604	0.308	0.029	1.24e-222	Nematocytes	2	nem_2	LOW QUALITY PROTEIN: zinc finger protein 782	ZNF354A	metal ion binding	regulation of transcription, DNA-templated	nucleolus	XP_002167706.2 PREDICTED: zinc finger protein 37-like isoform X2 [Hydra vulgaris]	3.5e-58	OG0006170	42	24	NA	NA	NA	NA	NA	NA
HyS0057.28	3.2e-256	1.7864	0.391	0.045	7.04e-252	Nematocytes	2	nem_2	Non-lysosomal glucosylceramidase	GBA2	glucosylceramidase activity	glucosylceramide catabolic process	extrinsic component of Golgi membrane	XP_002159451.3 PREDICTED: non-lysosomal glucosylceramidase-like [Hydra vulgaris]	0	OG0004772	50	39	NA	NA	NA	NA	NA	NA
HyS0061.29	0	2.18109	0.467	0.035	0	Nematocytes	2	nem_2	Sporulation-specific N-acetylmuramoyl-L-alanine amidase	NA	N-acetylmuramoyl-L-alanine amidase activity	peptidoglycan catabolic process	extracellular region	XP_022799084.1 uncharacterized protein LOC111337117 [Stylophora pistillata]	9.6e-18	OG0009161	19	3	YES	YES	YES	YES	NA	NA
HyS0072.15	1.31e-237	1.47785	0.302	0.025	2.89e-233	Nematocytes	2	nem_2	Spermidine synthase-saccharopine dehydrogenase	SPEE	spermidine synthase activity	polyamine biosynthetic process	cytoplasm	PFX28770.1 Spermidine synthase [Stylophora pistillata]	5.5e-65	OG0002065	76	46	NA	NA	NA	NA	NA	NA
HyS0084.47	0	1.89474	0.423	0.027	0	Nematocytes	2	nem_2	NA	NA	NA	NA	NA	NA	NA	OG0031384	2	2	YES	YES	YES	YES	YES	NA
HyS0091.15	0	2.02521	0.432	0.021	0	Nematocytes	2	nem_2	NA	NA	NA	NA	NA	XP_012563930.1 PREDICTED: uncharacterized protein LOC101235913 [Hydra vulgaris]	5.8e-06	OG0000582	177	13	NA	NA	NA	NA	NA	NA
HyS0106.29	9.79e-210	1.40569	0.295	0.029	2.16e-205	Nematocytes	2	nem_2	NA	NA	NA	NA	NA	XP_002155966.2 PREDICTED: ras-related protein Rab-3C-like [Hydra vulgaris]	8e-17	OG0031122	2	2	YES	YES	YES	YES	YES	NA
HyS0655.4	0	1.89625	0.435	0.031	0	Nematocytes	2	nem_2	NA	NA	NA	NA	NA	XP_012560958.1 PREDICTED: uncharacterized protein LOC105846593 [Hydra vulgaris]	2.3e-33	OG0008024	26	14	YES	NA	NA	NA	NA	NA
HyS1059.1	0	2.21234	0.522	0.041	0	Nematocytes	2	nem_2	LOW QUALITY PROTEIN: unconventional myosin-XV	MYO15A	actin binding	sensory perception of sound	myosin complex	XP_028413163.1 unconventional myosin-XV-like isoform X1 [Dendronephthya gigantea]	0	OG0000194	393	47	NA	NA	NA	NA	NA	NA
HyS0001.139	0	1.35025	0.388	0.009	0	Epithelial Cells	3	enEp/ecEp	Collagen type XI alpha 2 chain	COL11A2	extracellular matrix structural constituent	collagen fibril organization	collagen trimer	XP_012555800.1 PREDICTED: collagen alpha-1(V) chain-like [Hydra vulgaris]	2.1e-49	OG0000318	282	37	NA	NA	NA	NA	NA	NA
HyS0001.277	0	2.55823	0.47	0.014	0	Epithelial Cells	3	enEp/ecEp	NA	NA	NA	NA	NA	XP_009060805.1 hypothetical protein LOTGIDRAFT_234488 [Lottia gigantea]	6.2e-06	OG0011333	11	5	NA	NA	NA	NA	NA	NA
HyS0001.30	0	1.47326	0.344	0.003	0	Epithelial Cells	3	enEp/ecEp	Carbohydrate-binding module family 1 protein	NA	chitin binding	chitin metabolic process	mucus layer	XP_012559915.1 PREDICTED: uncharacterized protein LOC100210597 [Hydra vulgaris]	9.9e-135	OG0000798	141	21	NA	NA	NA	NA	NA	NA
HyS0001.315	0	1.46032	0.39	0.006	0	Epithelial Cells	3	enEp/ecEp	Angiotensin-converting enzyme	ACE	peptidyl-dipeptidase activity	proteolysis	extracellular space	XP_004208490.1 PREDICTED: angiotensin-converting enzyme-like [Hydra vulgaris]	1.4e-222	OG0000586	176	39	NA	NA	NA	NA	NA	NA
HyS0001.340	0	0.946135	0.28	0.009	0	Epithelial Cells	3	enEp/ecEp	Laminin subunit alpha-5 (inferred by orthology to a human protein)	NA	signaling receptor binding	regulation of embryonic development	basement membrane	XP_012558958.1 PREDICTED: laminin subunit alpha-3-like [Hydra vulgaris]	0	OG0000090	597	45	NA	NA	NA	NA	NA	NA
HyS0001.344	3.18e-273	1.11045	0.357	0.024	7e-269	Epithelial Cells	3	enEp/ecEp	Glypican-6	NA	NA	regulation of signal transduction	anchored component of plasma membrane	XP_002157574.3 PREDICTED: glypican-6-like [Hydra vulgaris]	2.9e-114	OG0001273	105	41	NA	NA	NA	NA	NA	NA
HyS0001.51	0	0.960931	0.254	0.001	0	Epithelial Cells	3	enEp/ecEp	NA	NA	NA	NA	NA	NA	NA	OG0031450	2	2	YES	YES	YES	YES	YES	NA
HyS0001.547	2.79e-272	1.43533	0.464	0.048	6.15e-268	Epithelial Cells	3	enEp/ecEp	Guanine nucleotide exchange factor DBS	NA	Rho guanyl-nucleotide exchange factor activity	regulation of Rho protein signal transduction	integral component of membrane	XP_002170266.2 PREDICTED: guanine nucleotide exchange factor DBS-like isoform X1 [Hydra vulgaris]	2.4e-308	OG0000299	295	42	NA	NA	NA	NA	NA	NA
HyS0001.605	0	0.751319	0.278	0.003	0	Epithelial Cells	3	enEp/ecEp	NA	NA	NA	NA	NA	ADL39772.1 allorecognition 1 [Hydractinia symbiolongicarpus]	1.1e-10	OG0030966	2	2	YES	YES	YES	YES	YES	NA
HyS0001.623	0	0.97799	0.293	0.005	0	Epithelial Cells	3	enEp/ecEp	NA	NA	NA	NA	NA	ADL39783.1 allorecognition 1 [Hydractinia symbiolongicarpus]	3.3e-11	OG0023676	3	2	YES	YES	YES	YES	YES	NA
HyS0001.624	0	1.35477	0.375	0.007	0	Epithelial Cells	3	enEp/ecEp	NA	NA	NA	NA	NA	ADL39770.1 allorecognition 1 [Hydractinia symbiolongicarpus]	1.5e-15	OG0013854	7	3	YES	YES	YES	YES	NA	NA
HyS0001.636	0	1.92264	0.608	0.017	0	Epithelial Cells	3	enEp/ecEp	Follistatin-related protein 1	FSTL1	calcium ion binding	regulation of BMP signaling pathway	extracellular region	XP_002170609.3 PREDICTED: follistatin-related protein 1-like [Hydra vulgaris]	1.5e-58	OG0008257	24	22	NA	NA	NA	NA	NA	NA
HyS0001.681	0	2.1276	0.505	0.021	0	Epithelial Cells	3	enEp/ecEp	NA	NA	NA	NA	NA	XP_002158859.1 PREDICTED: BPTI/Kunitz domain-containing protein 4-like [Hydra vulgaris]	3.3e-06	OG0023490	3	2	YES	YES	YES	YES	YES	NA
HyS0001.682	0	1.38392	0.297	0.004	0	Epithelial Cells	3	enEp/ecEp	Membrane metalloendopeptidase	NA	metalloendopeptidase activity	proteolysis	nucleolus	XP_020913815.1 endothelin-converting enzyme homolog [Exaiptasia pallida]	2.1e-132	OG0000072	655	46	NA	NA	NA	NA	NA	NA
HyS0001.693	0	2.89851	0.639	0.03	0	Epithelial Cells	3	enEp/ecEp	NA	NA	NA	NA	NA	XP_016896479.1 low density lipoprotein receptor adapter protein 1-like isoform X3 [Cynoglossus semilaevis]	4.2e-12	OG0008469	23	16	NA	NA	NA	NA	NA	NA
HyS0001.701	0	1.22805	0.384	0.023	0	Epithelial Cells	3	enEp/ecEp	NA	NA	NA	NA	NA	XP_002162866.1 PREDICTED: uncharacterized protein LOC100206984 [Hydra vulgaris]	1.4e-110	OG0010027	15	11	YES	NA	NA	NA	NA	NA
HyS0001.82	0	0.835367	0.254	0.001	0	Epithelial Cells	3	enEp/ecEp	Laminin subunit gamma-1	LAMC3	extracellular matrix structural constituent	astrocyte development	basement membrane	XP_012557210.1 PREDICTED: laminin subunit gamma-1 [Hydra vulgaris]	0	OG0000090	597	45	NA	NA	NA	NA	NA	NA
HyS0002.287	0	1.21691	0.351	0.006	0	Epithelial Cells	3	enEp/ecEp	NA	NA	NA	NA	NA	NA	NA	OG0030960	2	2	YES	YES	YES	YES	YES	NA
HyS0002.407	0	2.91791	0.528	0.015	0	Epithelial Cells	3	enEp/ecEp	Putative cadherin egf lag seven-pass g-type receptor	NA	calcium ion binding	Notch signaling pathway	integral component of membrane	XP_012554603.1 PREDICTED: uncharacterized protein LOC100208285 [Hydra vulgaris]	0	OG0000045	971	44	NA	NA	NA	NA	NA	NA
HyS0002.427	0	1.12327	0.278	0.005	0	Epithelial Cells	3	enEp/ecEp	Chorion peroxidase	NA	peroxidase activity	response to oxidative stress	extracellular space	XP_028413610.1 eosinophil peroxidase-like [Dendronephthya gigantea]	1.2e-101	OG0000151	449	43	NA	NA	NA	NA	NA	NA
HyS0002.435	8.08e-277	0.9952	0.34	0.021	1.78e-272	Epithelial Cells	3	enEp/ecEp	Breast cancer anti-estrogen resistance protein 1	NEDD9	protein tyrosine kinase binding	positive regulation of substrate adhesion-dependent cell spreading	spindle pole	XP_002164065.3 PREDICTED: uncharacterized protein LOC100206888 [Hydra vulgaris]	7.4e-270	OG0002984	62	40	NA	NA	NA	NA	NA	NA
HyS0002.448	1.47e-220	1.32038	0.404	0.044	3.25e-216	Epithelial Cells	3	enEp/ecEp	Abhydrolase domain-containing protein 4	ABHD4	carboxylic ester hydrolase activity	lipid homeostasis	lipid droplet	XP_002156760.1 PREDICTED: 1-acylglycerol-3-phosphate O-acyltransferase ABHD5-like [Hydra vulgaris]	5.6e-142	OG0001209	109	48	NA	NA	NA	NA	NA	NA
HyS0002.501	0	1.55882	0.332	0.007	0	Epithelial Cells	3	enEp/ecEp	Nose resistant to fluoxetine protein 6	NA	transferase activity, transferring acyl groups other than amino-acyl groups	NA	integral component of membrane	XP_002157103.2 PREDICTED: nose resistant to fluoxetine protein 6-like [Hydra vulgaris]	1.9e-144	OG0000236	346	42	NA	NA	NA	NA	NA	NA
HyS0002.585	6.36e-208	1.10361	0.313	0.026	1.4e-203	Epithelial Cells	3	enEp/ecEp	NA	NA	NA	NA	NA	NA	NA	OG0011073	12	2	YES	YES	YES	YES	YES	NA
HyS0003.200	0	1.28596	0.476	0.041	0	Epithelial Cells	3	enEp/ecEp	Poly [ADP-ribose] polymerase 12 (Fragment)	NA	metal ion binding	NA	NA	XP_004208393.2 PREDICTED: uncharacterized protein LOC101235770 [Hydra vulgaris]	2.1e-195	OG0000145	469	36	NA	NA	NA	NA	NA	NA
HyS0003.270	3.41e-249	0.725877	0.291	0.016	7.51e-245	Epithelial Cells	3	enEp/ecEp	NA	NA	NA	NA	NA	XP_015761398.1 PREDICTED: uncharacterized protein LOC107340554 isoform X1 [Acropora digitifera]	9.9e-25	OG0014263	6	4	YES	NA	NA	NA	NA	NA
HyS0003.276	0	1.82839	0.513	0.039	0	Epithelial Cells	3	enEp/ecEp	NA	NA	NA	NA	NA	XP_028392828.1 cytochrome c oxidase subunit NDUFA4-like [Dendronephthya gigantea]	3e-05	OG0004204	53	32	NA	NA	NA	NA	NA	NA
HyS0003.277	0	3.70242	0.404	0.025	0	Epithelial Cells	3	enEp/ecEp	NA	NA	NA	NA	NA	XP_027055346.1 uncharacterized protein LOC113682384 isoform X2 [Pocillopora damicornis]	3.7e-27	OG0009928	15	9	YES	NA	NA	NA	NA	NA
HyS0003.31	0	1.89337	0.373	0.013	0	Epithelial Cells	3	enEp/ecEp	NA	NA	NA	NA	NA	NA	NA	Unassigned	NA	NA	NA	NA	NA	NA	NA	NA
HyS0003.352	0	3.09692	0.703	0.015	0	Epithelial Cells	3	enEp/ecEp	NA	NA	NA	NA	NA	NA	NA	OG0031054	2	2	YES	YES	YES	YES	YES	NA
HyS0003.368	1.46e-282	1.50354	0.468	0.046	3.22e-278	Epithelial Cells	3	enEp/ecEp	NA	NA	NA	NA	NA	NA	NA	OG0023301	3	3	YES	YES	YES	NA	NA	NA
HyS0003.46	7.15e-229	1.10667	0.348	0.03	1.58e-224	Epithelial Cells	3	enEp/ecEp	Multifunctional procollagen lysine hydroxylase and glycosyltransferase LH3	PLOD3	procollagen-lysine 5-dioxygenase activity	motor neuron axon guidance	endoplasmic reticulum	XP_002157097.1 PREDICTED: procollagen-lysine,2-oxoglutarate 5-dioxygenase 1-like [Hydra vulgaris]	3e-301	OG0002135	74	43	NA	NA	NA	NA	NA	NA
HyS0003.475	0	1.10888	0.346	0.007	0	Epithelial Cells	3	enEp/ecEp	Transporter	NA	neurotransmitter:sodium symporter activity	neurotransmitter transport	integral component of membrane	XP_002161387.2 PREDICTED: sodium-dependent neutral amino acid transporter B(0)AT2-like [Hydra vulgaris]	3.6e-202	OG0000047	938	43	NA	NA	NA	NA	NA	NA
HyS0003.481	0	1.56171	0.524	0.029	0	Epithelial Cells	3	enEp/ecEp	Butyrate response factor 1	ZFP36L2	metal ion binding	cellular response to granulocyte macrophage colony-stimulating factor stimulus	nucleus	XP_002159721.2 PREDICTED: zinc finger protein 36, C3H1 type-like 2-B [Hydra vulgaris]	1.9e-78	OG0001599	90	44	NA	NA	NA	NA	NA	NA
HyS0003.486	0	2.59327	0.557	0.031	0	Epithelial Cells	3	enEp/ecEp	CARD-caspase	NA	cysteine-type endopeptidase activity	proteolysis	cytoplasm	XP_002165630.2 PREDICTED: caspase-3-like [Hydra vulgaris]	7.2e-64	OG0000115	529	42	NA	NA	NA	NA	NA	NA
HyS0003.547	0	1.95659	0.414	0.013	0	Epithelial Cells	3	enEp/ecEp	NA	NA	NA	NA	NA	NA	NA	OG0031049	2	2	YES	YES	YES	YES	YES	NA
HyS0004.106	0	0.985335	0.305	0.002	0	Epithelial Cells	3	enEp/ecEp	Secreted carboxypeptidase	NA	metallocarboxypeptidase activity	proteolysis	integral component of membrane	KXJ13487.1 Carboxypeptidase A4 [Exaiptasia pallida]	7.5e-82	OG0000227	357	43	NA	NA	NA	NA	NA	NA
HyS0004.16	0	3.55858	0.781	0.038	0	Epithelial Cells	3	enEp/ecEp	NA	NA	NA	NA	NA	XP_001638232.1 predicted protein [Nematostella vectensis]	7.2e-14	OG0004141	54	16	NA	NA	NA	NA	NA	NA
HyS0004.178	2.58e-231	1.36538	0.342	0.028	5.69e-227	Epithelial Cells	3	enEp/ecEp	LOW QUALITY PROTEIN: unconventional myosin-Ia	MYO1A	actin binding	microvillus assembly	myosin complex	XP_012556458.1 PREDICTED: unconventional myosin-Ia-like [Hydra vulgaris]	0	OG0000350	261	49	NA	NA	NA	NA	NA	NA
HyS0004.187	0	0.985894	0.274	0.007	0	Epithelial Cells	3	enEp/ecEp	Phox homologous domain	NA	phosphatidylinositol binding	late endosome to Golgi transport	protein-lipid complex	XP_012557629.1 PREDICTED: uncharacterized protein LOC100199607 [Hydra vulgaris]	2.9e-78	OG0006783	37	18	NA	NA	NA	NA	NA	NA
HyS0004.225	0	2.08308	0.542	0.011	0	Epithelial Cells	3	enEp/ecEp	NA	NA	NA	NA	NA	XP_022800048.1 arf-GAP with coiled-coil, ANK repeat and PH domain-containing protein 2-like [Stylophora pistillata]	5.1e-09	OG0007021	35	16	NA	NA	NA	NA	NA	NA
HyS0004.351	0	1.88405	0.427	0.017	0	Epithelial Cells	3	enEp/ecEp	Type IIA procollagen	COL2A1	extracellular matrix structural constituent	embryonic skeletal joint morphogenesis	collagen trimer	ABG80450.1 fibrillar collagen, partial [Hydra vulgaris]	2e-144	OG0000318	282	37	NA	NA	NA	NA	NA	NA
HyS0004.443	4.58e-230	1.18262	0.427	0.048	1.01e-225	Epithelial Cells	3	enEp/ecEp	Discoidin domain receptor tyrosine kinase 2	NA	protein tyrosine kinase collagen receptor activity	cell adhesion	receptor complex	XP_012562856.1 PREDICTED: uncharacterized protein LOC101239750, partial [Hydra vulgaris]	0	OG0000012	1678	44	NA	NA	NA	NA	NA	NA
HyS0004.450	0	1.8199	0.433	0.008	0	Epithelial Cells	3	enEp/ecEp	RAS like proto-oncogene B	NA	GTPase activity	Ras protein signal transduction	plasma membrane	XP_004208137.1 PREDICTED: ras-related protein Ral-A-like [Hydra vulgaris]	4.9e-71	OG0000163	432	49	NA	NA	NA	NA	NA	NA
HyS0004.64	0	4.28686	0.862	0.039	0	Epithelial Cells	3	enEp/ecEp	C-terminal tandem repeated domain in type 4 procollagen	NA	extracellular matrix structural constituent	aorta smooth muscle tissue morphogenesis	collagen trimer	XP_002154684.1 PREDICTED: uncharacterized protein LOC100200063 [Hydra vulgaris]	9.7e-140	OG0008764	21	18	NA	NA	NA	NA	NA	NA
HyS0004.80	0	2.74885	0.68	0.034	0	Epithelial Cells	3	enEp/ecEp	Glutathione S-transferase 1	NA	transferase activity	NA	NA	XP_012525927.2 uncharacterized protein LOC105830844 [Monomorium pharaonis]	6.4e-23	OG0000129	502	48	NA	NA	NA	NA	NA	NA
HyS0005.144	8.74e-279	0.759673	0.254	0.009	1.93e-274	Epithelial Cells	3	enEp/ecEp	MAM and LDL-receptor class A domain-containing protein 2	NA	scavenger receptor activity	chitin metabolic process	extracellular region	XP_004205501.1 PREDICTED: uncharacterized protein LOC100200388 isoform X1 [Hydra vulgaris]	6.1e-199	OG0000094	589	42	NA	NA	NA	NA	NA	NA
HyS0005.149	9.84e-270	0.896143	0.318	0.018	2.17e-265	Epithelial Cells	3	enEp/ecEp	LOW QUALITY PROTEIN: SH3 and multiple ankyrin repeat domains protein 3	NA	ionotropic glutamate receptor binding	postsynaptic density organization	ionotropic glutamate receptor complex	XP_012563379.1 PREDICTED: SH3 and multiple ankyrin repeat domains protein 2-like [Hydra vulgaris]	4.8e-235	OG0001658	88	46	NA	NA	NA	NA	NA	NA
HyS0005.20	0	0.83589	0.287	0.007	0	Epithelial Cells	3	enEp/ecEp	Peptidoglycan binding domain	NA	calcium ion binding	NA	NA	XP_028408555.1 serine/arginine repetitive matrix protein 2-like isoform X2 [Dendronephthya gigantea]	4.3e-44	OG0008180	25	8	YES	NA	NA	NA	NA	NA
HyS0005.29	0	2.5218	0.678	0.018	0	Epithelial Cells	3	enEp/ecEp	NA	NA	NA	NA	NA	NA	NA	OG0002100	75	32	NA	NA	NA	NA	NA	NA
HyS0005.297	0	2.36984	0.656	0.03	0	Epithelial Cells	3	enEp/ecEp	NA	NA	NA	NA	NA	XP_004206079.1 PREDICTED: pyroglutamylated RFamide peptide receptor-like [Hydra vulgaris]	1.3e-44	OG0000003	2397	41	NA	NA	NA	NA	NA	NA
HyS0005.361	0	2.53485	0.579	0.02	0	Epithelial Cells	3	enEp/ecEp	NA	NA	NA	NA	NA	KCW81436.1 hypothetical protein EUGRSUZ_C02815 [Eucalyptus grandis]	4.1e-05	OG0013069	8	4	YES	NA	NA	NA	NA	NA
HyS0005.384	0	1.67624	0.412	0.007	0	Epithelial Cells	3	enEp/ecEp	Twin-arginine translocation pathway signal	NA	cadherin binding	proton transmembrane transport	integral component of membrane	XP_027058145.1 uncharacterized protein LOC113684921 [Pocillopora damicornis]	4.2e-195	OG0000703	156	15	YES	NA	NA	NA	NA	NA
HyS0005.393	0	3.48249	0.823	0.033	0	Epithelial Cells	3	enEp/ecEp	NA	NA	NA	NA	NA	NA	NA	OG0016548	5	4	YES	YES	NA	NA	NA	NA
HyS0005.77	1.78e-246	0.960222	0.266	0.013	3.93e-242	Epithelial Cells	3	enEp/ecEp	Peroxidasin	PXDN	peroxidase activity	response to oxidative stress	extracellular space	XP_020893766.1 peroxidasin-like [Exaiptasia pallida]	0	OG0000151	449	43	NA	NA	NA	NA	NA	NA
HyS0006.136	0	1.73728	0.32	0.011	0	Epithelial Cells	3	enEp/ecEp	NA	NA	NA	NA	NA	XP_012562602.1 PREDICTED: uncharacterized protein LOC105847528 [Hydra vulgaris]	2e-21	OG0008905	20	11	YES	NA	NA	NA	NA	NA
HyS0006.189	0	1.6273	0.495	0.025	0	Epithelial Cells	3	enEp/ecEp	Rac small GTPase	NA	GTPase activity	small GTPase mediated signal transduction	rhabdomere	XP_002158815.1 PREDICTED: ras-related C3 botulinum toxin substrate 1 [Hydra vulgaris]	2.1e-47	OG0014103	7	2	YES	YES	YES	YES	YES	NA
HyS0006.190	0	2.18905	0.522	0.016	0	Epithelial Cells	3	enEp/ecEp	Ras small GTPase, Ras type	RACA	GTPase activity	small GTPase mediated signal transduction	cell cortex	XP_022529531.1 cell division control protein 42 homolog isoform X1 [Astyanax mexicanus]	1.6e-14	Unassigned	NA	NA	NA	NA	NA	NA	NA	NA
HyS0006.2	0	2.14332	0.635	0.034	0	Epithelial Cells	3	enEp/ecEp	LOW QUALITY PROTEIN: transmembrane protein 26	NA	NA	NA	integral component of membrane	XP_012562260.1 PREDICTED: uncharacterized protein LOC100208207 [Hydra vulgaris]	6.7e-113	OG0000600	173	39	NA	NA	NA	NA	NA	NA
HyS0006.250	0	2.6066	0.724	0.045	0	Epithelial Cells	3	enEp/ecEp	NA	NA	NA	NA	NA	NA	NA	Unassigned	NA	NA	NA	NA	NA	NA	NA	NA
HyS0006.251	0	1.3377	0.433	0.019	0	Epithelial Cells	3	enEp/ecEp	NA	NA	NA	NA	NA	NA	NA	OG0023576	3	2	YES	YES	YES	YES	YES	NA
HyS0006.254	0	2.31051	0.482	0.027	0	Epithelial Cells	3	enEp/ecEp	NA	NA	NA	NA	NA	XP_015764933.1 PREDICTED: uncharacterized protein LOC107343859 [Acropora digitifera]	2e-13	OG0000184	407	33	NA	NA	NA	NA	NA	NA
HyS0006.302	0	2.06535	0.454	0.019	0	Epithelial Cells	3	enEp/ecEp	NA	NA	NA	NA	NA	XP_012558836.1 PREDICTED: uncharacterized protein LOC105845530 [Hydra vulgaris]	6e-26	OG0001900	80	18	NA	NA	NA	NA	NA	NA
HyS0006.303	0	1.62478	0.536	0.019	0	Epithelial Cells	3	enEp/ecEp	NA	NA	NA	NA	NA	XP_012558836.1 PREDICTED: uncharacterized protein LOC105845530 [Hydra vulgaris]	1e-08	OG0018615	4	4	YES	NA	NA	NA	NA	NA
HyS0007.110	0	0.811175	0.254	0.003	0	Epithelial Cells	3	enEp/ecEp	NA	NA	NA	NA	NA	AIU99841.1 Wnt5B, partial [Hydractinia echinata]	7.3e-65	OG0000117	523	42	NA	NA	NA	NA	NA	NA
HyS0007.206	0	2.1661	0.458	0.005	0	Epithelial Cells	3	enEp/ecEp	Antistasin	NA	serine-type endopeptidase inhibitor activity	negative regulation of endopeptidase activity	extracellular region	XP_002158859.1 PREDICTED: BPTI/Kunitz domain-containing protein 4-like [Hydra vulgaris]	8.9e-08	OG0000766	146	40	NA	NA	NA	NA	NA	NA
HyS0007.23	0	2.16936	0.643	0.041	0	Epithelial Cells	3	enEp/ecEp	NA	NA	NA	NA	NA	NA	NA	OG0023341	3	3	YES	YES	YES	NA	NA	NA
HyS0007.346	0	1.21114	0.282	0.004	0	Epithelial Cells	3	enEp/ecEp	4-aminobutyrate aminotransferase, mitochondrial	ABAT	4-aminobutyrate transaminase activity	gamma-aminobutyric acid metabolic process	4-aminobutyrate transaminase complex	XP_001626379.1 predicted protein [Nematostella vectensis]	2.7e-131	OG0001633	89	42	NA	NA	NA	NA	NA	NA
HyS0007.366	0	3.22955	0.682	0.009	0	Epithelial Cells	3	enEp/ecEp	MAM and LDL-receptor class A domain-containing protein 2	NA	metalloendopeptidase activity	proteolysis	extracellular region	XP_020624544.1 MAM and LDL-receptor class A domain-containing protein 1-like isoform X2 [Orbicella faveolata]	5.6e-100	OG0000004	2368	44	NA	NA	NA	NA	NA	NA
HyS0007.51	0	1.64223	0.392	0.007	0	Epithelial Cells	3	enEp/ecEp	NA	NA	NA	NA	NA	XP_012560143.1 PREDICTED: uncharacterized protein LOC101235803 [Hydra vulgaris]	3.2e-13	OG0004141	54	16	NA	NA	NA	NA	NA	NA
HyS0007.53	0	2.05544	0.482	0.007	0	Epithelial Cells	3	enEp/ecEp	Plasma kallikrein isoform A	NA	oxidoreductase activity, acting on paired donors, with incorporation or reduction of molecular oxygen	fatty acid omega-oxidation	integral component of membrane	XP_012555469.1 PREDICTED: cytochrome P450 4V2-like [Hydra vulgaris]	2.9e-130	OG0000015	1436	46	NA	NA	NA	NA	NA	NA
HyS0007.72	1.74e-303	1.71842	0.371	0.023	3.84e-299	Epithelial Cells	3	enEp/ecEp	NA	NA	NA	NA	NA	XP_004991231.1 hypothetical protein PTSG_08207 [Salpingoeca rosetta]	5.3e-15	OG0019742	4	3	NA	NA	NA	NA	NA	NA
HyS0007.81	0	1.18732	0.318	0.008	0	Epithelial Cells	3	enEp/ecEp	NA	NA	NA	NA	NA	EKC21356.1 A disintegrin and metalloproteinase with thrombospondin motifs 2 [Crassostrea gigas]	2.6e-10	OG0013055	8	4	YES	YES	NA	NA	NA	NA
HyS0007.84	1.13e-228	0.925593	0.258	0.014	2.5e-224	Epithelial Cells	3	enEp/ecEp	NA	NA	NA	NA	NA	XP_021349469.1 uncharacterized protein LOC110447847 [Mizuhopecten yessoensis]	7.9e-36	OG0011001	12	5	NA	NA	NA	NA	NA	NA
HyS0008.194	0	1.2962	0.351	0.009	0	Epithelial Cells	3	enEp/ecEp	NA	NA	NA	NA	NA	XP_004210083.1 PREDICTED: coiled-coil domain-containing protein CG32809-like isoform X1 [Hydra vulgaris]	1.4e-95	OG0003866	55	38	NA	NA	NA	NA	NA	NA
HyS0008.199	0	1.47479	0.474	0.003	0	Epithelial Cells	3	enEp/ecEp	Proto-oncogene tyrosine-protein kinase receptor Ret	NA	protein tyrosine kinase activity	peptidyl-tyrosine phosphorylation	receptor complex	XP_002169678.3 PREDICTED: fibroblast growth factor receptor 1-like [Hydra vulgaris]	2.6e-196	OG0000014	1507	47	NA	NA	NA	NA	NA	NA
HyS0008.292	0	1.59101	0.466	0.02	0	Epithelial Cells	3	enEp/ecEp	NA	NA	NA	NA	NA	NA	NA	OG0031237	2	2	YES	YES	YES	YES	YES	NA
HyS0008.361	0	3.81845	0.769	0.014	0	Epithelial Cells	3	enEp/ecEp	Triple helix repeat-containing collagen	COL1A1	extracellular matrix structural constituent	collagen biosynthetic process	collagen trimer	NP_001296598.1 collagen alpha-1(I) chain-like precursor [Hydra vulgaris]	0.00034	OG0012912	8	5	NA	NA	NA	NA	NA	NA
HyS0008.362	0	2.82439	0.581	0.009	0	Epithelial Cells	3	enEp/ecEp	Fibril-forming collagen alpha chain	NA	extracellular matrix structural constituent	skeletal system development	collagen trimer	XP_012558312.1 PREDICTED: collagen alpha-1(I) chain-like [Hydra vulgaris]	6.7e-93	OG0000318	282	37	NA	NA	NA	NA	NA	NA
HyS0009.171	0	2.62299	0.641	0.018	0	Epithelial Cells	3	enEp/ecEp	NA	NA	NA	NA	NA	XP_012555141.1 PREDICTED: general transcriptional corepressor trfA-like isoform X1 [Hydra vulgaris]	1.3e-38	OG0023300	3	3	YES	YES	YES	NA	NA	NA
HyS0009.195	0	1.66977	0.359	0.007	0	Epithelial Cells	3	enEp/ecEp	Dexamethasone-induced Ras-related protein 1	NA	GTPase activity	Rap protein signal transduction	membrane	XP_002170864.3 PREDICTED: GTP-binding protein Di-Ras2-like, partial [Hydra vulgaris]	2.6e-58	OG0011308	11	7	YES	YES	NA	NA	NA	NA
HyS0009.258	0	2.97045	0.672	0.01	0	Epithelial Cells	3	enEp/ecEp	NA	NA	NA	NA	NA	NA	NA	Unassigned	NA	NA	NA	NA	NA	NA	NA	NA
HyS0009.327	0	2.20097	0.445	0.017	0	Epithelial Cells	3	enEp/ecEp	NA	NA	NA	NA	NA	PFX31238.1 Importin-9 [Stylophora pistillata]	1e-15	OG0008249	24	14	NA	NA	NA	NA	NA	NA
HyS0009.342	8.63e-211	0.67778	0.272	0.018	1.9e-206	Epithelial Cells	3	enEp/ecEp	Arginine vasotocin-dependent aquaporin	AQPZ	channel activity	transmembrane transport	integral component of membrane	XP_008294131.1 PREDICTED: aquaporin-4-like [Stegastes partitus]	5.1e-52	OG0000302	293	45	NA	NA	NA	NA	NA	NA
HyS0009.363	4.29e-281	1.37081	0.392	0.03	9.44e-277	Epithelial Cells	3	enEp/ecEp	NA	NA	NA	NA	NA	XP_019553392.1 PREDICTED: transmembrane protein 47-like isoform X1 [Aedes albopictus]	0.0007	OG0031474	2	2	YES	YES	YES	YES	YES	NA
HyS0009.48	0	1.09822	0.328	0.01	0	Epithelial Cells	3	enEp/ecEp	NA	NA	NA	NA	NA	XP_012558915.1 PREDICTED: uncharacterized protein LOC100197130 [Hydra vulgaris]	4.4e-154	OG0004141	54	16	NA	NA	NA	NA	NA	NA
HyS0010.11	6.98e-281	0.787197	0.291	0.013	1.54e-276	Epithelial Cells	3	enEp/ecEp	ADP-ribosyl cyclase/cyclic ADP-ribose hydrolase	NA	NAD+ nucleosidase activity	NA	integral component of membrane	XP_012555017.1 PREDICTED: ADP-ribosyl cyclase/cyclic ADP-ribose hydrolase-like [Hydra vulgaris]	2.7e-37	OG0001522	92	32	NA	NA	NA	NA	NA	NA
HyS0010.161	0	1.33692	0.386	0.017	0	Epithelial Cells	3	enEp/ecEp	NA	NA	NA	NA	NA	XP_012558087.1 PREDICTED: uncharacterized protein LOC101240168 [Hydra vulgaris]	0	OG0001018	121	38	NA	NA	NA	NA	NA	NA
HyS0010.162	0	1.16997	0.379	0.004	0	Epithelial Cells	3	enEp/ecEp	Latent transforming growth factor beta binding protein 1	FBN1	calcium ion binding	sequestering of BMP in extracellular matrix	microfibril	XP_002158507.2 PREDICTED: latent-transforming growth factor beta-binding protein 2-like [Hydra vulgaris]	5.4e-78	OG0001176	111	47	NA	NA	NA	NA	NA	NA
HyS0010.228	0	2.53137	0.666	0.038	0	Epithelial Cells	3	enEp/ecEp	NA	NA	NA	NA	NA	XP_002154246.1 PREDICTED: myotilin-like [Hydra vulgaris]	4.8e-09	OG0009108	19	12	NA	NA	NA	NA	NA	NA
HyS0010.307	0	1.54707	0.33	0.015	0	Epithelial Cells	3	enEp/ecEp	ETS domain-containing protein (Fragment)	NA	sequence-specific DNA binding	regulation of transcription, DNA-templated	nucleus	XP_012555638.1 PREDICTED: ETS domain-containing protein Elk-3-like [Hydra vulgaris]	6.8e-43	OG0000089	597	44	NA	NA	NA	NA	NA	NA
HyS0010.314	0	0.914119	0.322	0.003	0	Epithelial Cells	3	enEp/ecEp	Metalloendopeptidase	NA	metalloendopeptidase activity	proteolysis	extracellular region	XP_002155331.1 PREDICTED: zinc metalloproteinase nas-15-like [Hydra vulgaris]	6.4e-89	OG0000004	2368	44	NA	NA	NA	NA	NA	NA
HyS0010.367	0	1.42539	0.412	0.011	0	Epithelial Cells	3	enEp/ecEp	NA	NA	NA	NA	NA	NA	NA	OG0018606	4	4	YES	YES	YES	NA	NA	NA
HyS0011.126	0	0.978338	0.293	0.005	0	Epithelial Cells	3	enEp/ecEp	NA	NA	NA	NA	NA	XP_012559683.1 PREDICTED: uncharacterized protein LOC100214047 [Hydra vulgaris]	2.2e-09	OG0014086	7	3	YES	YES	YES	NA	NA	NA
HyS0011.211	0	1.44433	0.466	0.035	0	Epithelial Cells	3	enEp/ecEp	EF-hand domain-containing protein	NA	calcium ion binding	NA	NA	XP_002167031.3 PREDICTED: putative leucine-rich repeat-containing protein DDB_G0290503 [Hydra vulgaris]	3.7e-47	OG0006560	39	10	NA	NA	NA	NA	NA	NA
HyS0011.238	0	0.943054	0.299	0.006	0	Epithelial Cells	3	enEp/ecEp	Extracellular calcium-sensing receptor (Fragment)	NA	G protein-coupled receptor activity	G protein-coupled receptor signaling pathway	plasma membrane	XP_012559955.1 PREDICTED: extracellular calcium-sensing receptor-like [Hydra vulgaris]	4.7e-232	OG0000033	1070	45	NA	NA	NA	NA	NA	NA
HyS0011.285	0	1.8754	0.53	0.02	0	Epithelial Cells	3	enEp/ecEp	Hormonally up-regulated neu tumor-associated kinase	HUNK	protein kinase activity	protein phosphorylation	nucleus	XP_002154410.2 PREDICTED: probable serine/threonine-protein kinase KCC4 [Hydra vulgaris]	5.5e-131	OG0000274	311	49	NA	NA	NA	NA	NA	NA
HyS0012.15	0	1.27299	0.309	0.004	0	Epithelial Cells	3	enEp/ecEp	NA	NA	NA	NA	NA	XP_020607401.1 epididymal secretory protein E1-like [Orbicella faveolata]	4.7e-20	OG0001196	109	40	NA	NA	NA	NA	NA	NA
HyS0012.167	6.42e-224	1.04465	0.32	0.025	1.41e-219	Epithelial Cells	3	enEp/ecEp	BZIP domain-containing protein (Fragment)	NA	DNA-binding transcription factor activity	circadian rhythm	nucleus	XP_014233806.1 neurogenic protein mastermind-like isoform X8 [Trichogramma pretiosum]	1.5e-07	OG0000686	158	41	NA	NA	NA	NA	NA	NA
HyS0012.224	0	1.26462	0.293	0.01	0	Epithelial Cells	3	enEp/ecEp	EGF, latrophilin and seven transmembrane domain-containing protein 1 (Fragment)	NA	G protein-coupled receptor activity	G protein-coupled receptor signaling pathway	integral component of plasma membrane	XP_015761837.1 PREDICTED: adhesion G-protein coupled receptor F1-like [Acropora digitifera]	2.5e-83	OG0000026	1183	45	NA	NA	NA	NA	NA	NA
HyS0012.247	0	1.07315	0.318	0.002	0	Epithelial Cells	3	enEp/ecEp	Zinc metalloproteinase	NA	metalloendopeptidase activity	proteolysis	extracellular region	XP_015754613.1 PREDICTED: uncharacterized protein LOC107334199 [Acropora digitifera]	2.8e-211	OG0000004	2368	44	NA	NA	NA	NA	NA	NA
HyS0012.29	0	2.90138	0.47	0.02	0	Epithelial Cells	3	enEp/ecEp	Cysteine dioxygenase	NA	dioxygenase activity	oxidation-reduction process	NA	XP_022105949.1 uncharacterized protein LOC110987493 [Acanthaster planci]	9.7e-101	OG0009643	16	9	NA	NA	NA	NA	NA	NA
HyS0013.200	0	1.30307	0.429	0.01	0	Epithelial Cells	3	enEp/ecEp	NA	NA	NA	NA	NA	XP_028410476.1 uncharacterized protein LOC114533093 isoform X1 [Dendronephthya gigantea]	1.5e-07	OG0003145	60	30	NA	NA	NA	NA	NA	NA
HyS0013.22	0	2.83531	0.569	0.012	0	Epithelial Cells	3	enEp/ecEp	NA	NA	NA	NA	NA	NA	NA	OG0031567	2	2	YES	YES	YES	YES	YES	NA
HyS0013.252	0	1.10551	0.276	0.003	0	Epithelial Cells	3	enEp/ecEp	Magnesium-translocating P-type ATPase	NA	ion transmembrane transporter activity, phosphorylative mechanism	divalent metal ion transport	sarcoplasmic reticulum membrane	XP_012564786.1 PREDICTED: sodium/potassium-transporting ATPase subunit alpha-1-like [Hydra vulgaris]	2.3e-23	OG0016443	5	5	NA	NA	NA	NA	NA	NA
HyS0013.272	0	1.08751	0.355	0.003	0	Epithelial Cells	3	enEp/ecEp	MFS domain-containing protein (Fragment)	NA	transmembrane transporter activity	transmembrane transport	integral component of plasma membrane	XP_002158070.2 PREDICTED: organic cation transporter protein-like [Hydra vulgaris]	2.2e-151	OG0000018	1309	43	NA	NA	NA	NA	NA	NA
HyS0014.100	1.28e-272	1.024	0.278	0.012	2.82e-268	Epithelial Cells	3	enEp/ecEp	NA	NA	NA	NA	NA	NA	NA	OG0030915	2	2	YES	YES	YES	YES	YES	NA
HyS0014.109	0	2.31408	0.569	0.011	0	Epithelial Cells	3	enEp/ecEp	Kazal-type serine protease inhibitor domain protein	NA	NA	NA	NA	XP_004212739.1 PREDICTED: follistatin-like [Hydra vulgaris]	4.6e-22	OG0000696	157	16	NA	NA	NA	NA	NA	NA
HyS0014.154	0	1.34071	0.398	0.002	0	Epithelial Cells	3	enEp/ecEp	BPTI/Kunitz inhibitor domain-containing protein (Fragment)	NA	serine-type endopeptidase inhibitor activity	negative regulation of endopeptidase activity	extracellular region	XP_012562520.1 PREDICTED: uncharacterized protein LOC101239976 [Hydra vulgaris]	3.7e-133	OG0000132	496	42	NA	NA	NA	NA	NA	NA
HyS0014.159	0	1.07911	0.268	0.005	0	Epithelial Cells	3	enEp/ecEp	LOW QUALITY PROTEIN: zinc finger protein 74	NA	nucleic acid binding	regulation of transcription, DNA-templated	nucleus	XP_002167706.2 PREDICTED: zinc finger protein 37-like isoform X2 [Hydra vulgaris]	4.3e-101	OG0006170	42	24	NA	NA	NA	NA	NA	NA
HyS0014.165	0	0.864281	0.274	0.004	0	Epithelial Cells	3	enEp/ecEp	NA	NA	NA	NA	NA	XP_012555605.1 PREDICTED: uncharacterized protein LOC100212495 [Hydra vulgaris]	2e-08	OG0018686	4	4	YES	YES	YES	NA	NA	NA
HyS0014.250	0	1.50779	0.307	0.007	0	Epithelial Cells	3	enEp/ecEp	Cre-tyr-3 protein (Fragment)	NA	NA	NA	NA	XP_004212739.1 PREDICTED: follistatin-like [Hydra vulgaris]	1.5e-58	OG0000696	157	16	NA	NA	NA	NA	NA	NA
HyS0014.274	0	3.23949	0.784	0.013	0	Epithelial Cells	3	enEp/ecEp	NA	NA	NA	NA	NA	XP_002154216.2 PREDICTED: putative leucine-rich repeat-containing protein DDB_G0290503 [Hydra vulgaris]	1.2e-152	OG0011723	10	8	YES	YES	NA	NA	NA	NA
HyS0014.340	0	1.98495	0.532	0.018	0	Epithelial Cells	3	enEp/ecEp	Tetratricopeptide repeat domain	TTC28	protein kinase regulator activity	positive regulation of kinase activity	integral component of membrane	XP_012559564.1 PREDICTED: tetratricopeptide repeat protein 28-like isoform X2 [Hydra vulgaris]	7.8e-125	OG0000185	405	38	NA	NA	NA	NA	NA	NA
HyS0014.346	2.51e-220	0.982436	0.252	0.014	5.52e-216	Epithelial Cells	3	enEp/ecEp	NA	NA	NA	NA	NA	XP_013382568.1 pre-piRNA 3'-exonuclease trimmer [Lingula anatina]	3.9e-07	OG0016529	5	3	YES	YES	YES	YES	NA	NA
HyS0014.92	0	2.18958	0.584	0.004	0	Epithelial Cells	3	enEp/ecEp	NA	NA	NA	NA	NA	XP_015755783.1 PREDICTED: uncharacterized protein LOC107335290 [Acropora digitifera]	9.8e-11	OG0003111	61	13	YES	NA	NA	NA	NA	NA
HyS0015.180	0	1.08789	0.324	0.005	0	Epithelial Cells	3	enEp/ecEp	Receptor protein-tyrosine kinase	NA	protein tyrosine kinase activity	peptidyl-tyrosine phosphorylation	cytoskeleton	XP_012554083.1 PREDICTED: uncharacterized protein LOC100214787 isoform X1 [Hydra vulgaris]	4.7e-180	OG0013907	7	5	YES	YES	NA	NA	NA	NA
HyS0015.186	0	1.43743	0.449	0.006	0	Epithelial Cells	3	enEp/ecEp	NA	NA	NA	NA	NA	NA	NA	OG0031283	2	2	YES	YES	YES	YES	YES	NA
HyS0015.261	0	2.44635	0.548	0.011	0	Epithelial Cells	3	enEp/ecEp	NA	NA	NA	NA	NA	XP_012561111.1 PREDICTED: transcription factor kayak-like [Hydra vulgaris]	6.6e-09	OG0001113	115	42	NA	NA	NA	NA	NA	NA
HyS0016.291	0	2.48272	0.627	0.041	0	Epithelial Cells	3	enEp/ecEp	NA	NA	NA	NA	NA	XP_002158329.3 PREDICTED: uncharacterized protein LOC100202905 [Hydra vulgaris]	1.4e-23	OG0010016	15	7	YES	YES	NA	NA	NA	NA
HyS0016.300	0	2.447	0.637	0.026	0	Epithelial Cells	3	enEp/ecEp	DEAD (Asp-Glu-Ala-Asp) box polypeptide 4	NA	helicase activity	regulation of meiotic cell cycle	P granule	NA	NA	Unassigned	NA	NA	NA	NA	NA	NA	NA	NA
HyS0017.104	0	1.11261	0.324	0.006	0	Epithelial Cells	3	enEp/ecEp	NA	NA	NA	NA	NA	NA	NA	Unassigned	NA	NA	NA	NA	NA	NA	NA	NA
HyS0017.128	6.99e-297	0.975818	0.324	0.016	1.54e-292	Epithelial Cells	3	enEp/ecEp	Tyrosine-protein phosphatase non-receptor type 1	PTPRC	protein tyrosine phosphatase activity	peptidyl-tyrosine dephosphorylation	integral component of membrane	XP_012563018.1 PREDICTED: uncharacterized protein LOC105847785, partial [Hydra vulgaris]	8.5e-148	OG0003962	55	8	NA	NA	NA	NA	NA	NA
HyS0017.146	0	0.992809	0.287	0.003	0	Epithelial Cells	3	enEp/ecEp	Advillin	AVIL	actin filament binding	cytoskeleton organization	axon	XP_012555358.1 PREDICTED: advillin [Hydra vulgaris]	0	OG0000283	305	48	NA	NA	NA	NA	NA	NA
HyS0017.179	0	2.0002	0.606	0.036	0	Epithelial Cells	3	enEp/ecEp	Amyloid beta A4 protein-binding family B member 1	APBB1	amyloid-beta binding	NA	NA	XP_012557496.1 PREDICTED: amyloid beta A4 precursor protein-binding family B member 2-like [Hydra vulgaris]	2.7e-191	OG0004166	53	37	NA	NA	NA	NA	NA	NA
HyS0017.204	0	2.45708	0.571	0.006	0	Epithelial Cells	3	enEp/ecEp	NA	NA	NA	NA	NA	XP_002165644.2 PREDICTED: uncharacterized protein LOC100209369 [Hydra vulgaris]	2.4e-39	OG0008793	21	8	YES	YES	NA	NA	NA	NA
HyS0017.245	0	1.24579	0.404	0.015	0	Epithelial Cells	3	enEp/ecEp	Fibroblast growth factor 12 (Fragment)	NA	growth factor activity	signal transduction	NA	XP_002165496.2 PREDICTED: fibroblast growth factor 12-like isoform X1 [Hydra vulgaris]	2.8e-83	OG0000335	273	32	NA	NA	NA	NA	NA	NA
HyS0017.253	0	1.3038	0.357	0.007	0	Epithelial Cells	3	enEp/ecEp	Proto-oncogene Wnt-1	NA	signaling receptor binding	Wnt signaling pathway	extracellular region	CAD54640.3 Wnt5A protein [Hydractinia echinata]	4.6e-202	OG0000117	523	42	NA	NA	NA	NA	NA	NA
HyS0017.274	2.15e-279	1.27211	0.377	0.027	4.74e-275	Epithelial Cells	3	enEp/ecEp	Parvalbumin	NA	calcium ion binding	calcium-mediated signaling	cytosol	XP_004206928.1 PREDICTED: neo-calmodulin-like isoform X2 [Hydra vulgaris]	1.5e-40	OG0000027	1167	49	NA	NA	NA	NA	NA	NA
HyS0017.334	0	0.624905	0.256	0.007	0	Epithelial Cells	3	enEp/ecEp	Guanidinobutyrase	NA	hydrolase activity, acting on carbon-nitrogen (but not peptide) bonds, in linear amidines	putrescine biosynthetic process from arginine, using agmatinase	mitochondrion	XP_013401182.1 guanidinobutyrase isoform X1 [Lingula anatina]	2.5e-120	OG0002861	63	32	NA	NA	NA	NA	NA	NA
HyS0017.42	0	0.904105	0.256	0.002	0	Epithelial Cells	3	enEp/ecEp	NA	NA	NA	NA	NA	XP_004211296.1 PREDICTED: furin-like protease 2 [Hydra vulgaris]	7.7e-80	OG0011707	10	7	YES	YES	NA	NA	NA	NA
HyS0017.98	0	2.38605	0.522	0.017	0	Epithelial Cells	3	enEp/ecEp	NA	NA	NA	NA	NA	XP_004206163.1 PREDICTED: uncharacterized protein LOC100206428 isoform X2 [Hydra vulgaris]	2.5e-16	OG0018661	4	4	YES	YES	YES	NA	NA	NA
HyS0018.166	0	2.73287	0.396	0.008	0	Epithelial Cells	3	enEp/ecEp	NA	NA	NA	NA	NA	XP_008896480.1 hypothetical protein PPTG_04341 [Phytophthora parasitica INRA-310]	2.3e-08	OG0000175	416	44	NA	NA	NA	NA	NA	NA
HyS0019.125	0	0.858597	0.266	0.004	0	Epithelial Cells	3	enEp/ecEp	NA	NA	NA	NA	NA	XP_012559682.1 PREDICTED: uncharacterized protein LOC105845947 [Hydra vulgaris]	3.4e-13	OG0030636	2	2	YES	YES	YES	YES	YES	NA
HyS0019.146	0	2.427	0.435	0.019	0	Epithelial Cells	3	enEp/ecEp	NA	NA	NA	NA	NA	XP_027014803.1 uncharacterized protein LOC113650579 [Tachysurus fulvidraco]	0.00018	OG0010528	13	5	YES	NA	NA	NA	NA	NA
HyS0019.147	0	1.36228	0.305	0.01	0	Epithelial Cells	3	enEp/ecEp	NA	NA	NA	NA	NA	XP_010897450.1 PREDICTED: uncharacterized protein LOC105027187 [Esox lucius]	5.3e-77	OG0007117	34	11	NA	NA	NA	NA	NA	NA
HyS0019.175	0	1.04431	0.348	0.008	0	Epithelial Cells	3	enEp/ecEp	serine protease hepsin	HPN	serine-type endopeptidase activity	proteolysis	nuclear membrane	XP_020615462.1 chymotrypsinogen B-like [Orbicella faveolata]	1.4e-57	OG0000006	2162	44	NA	NA	NA	NA	NA	NA
HyS0019.202	0	2.78631	0.575	0.023	0	Epithelial Cells	3	enEp/ecEp	NA	NA	NA	NA	NA	XP_002164639.2 PREDICTED: uncharacterized protein LOC100213149 [Hydra vulgaris]	2.4e-44	OG0004841	50	15	NA	NA	NA	NA	NA	NA
HyS0019.258	0	1.53353	0.412	0.016	0	Epithelial Cells	3	enEp/ecEp	Integrin alpha-4	ITGA2	collagen binding involved in cell-matrix adhesion	integrin-mediated signaling pathway	integrin complex	XP_012553768.1 PREDICTED: integrin alpha-8-like [Hydra vulgaris]	2.3e-177	OG0000290	302	46	NA	NA	NA	NA	NA	NA
HyS0019.281	0	2.966	0.705	0.032	0	Epithelial Cells	3	enEp/ecEp	Rho small monomeric GTPase	NA	GTPase activity	small GTPase mediated signal transduction	fungal-type vacuole membrane	XP_006821070.1 PREDICTED: rho-related GTP-binding protein RhoN-like [Saccoglossus kowalevskii]	2.7e-37	OG0000588	175	49	NA	NA	NA	NA	NA	NA
HyS0019.81	0	1.94703	0.388	0.013	0	Epithelial Cells	3	enEp/ecEp	NA	NA	NA	NA	NA	XP_004207050.1 PREDICTED: uncharacterized protein LOC101236484 [Hydra vulgaris]	3.3e-19	OG0030640	2	2	YES	YES	YES	YES	YES	NA
HyS0020.113	0	1.47992	0.289	0.006	0	Epithelial Cells	3	enEp/ecEp	NA	NA	NA	NA	NA	XP_021379627.1 uncharacterized protein LOC110467060 [Mizuhopecten yessoensis]	3.4e-11	OG0007429	31	29	NA	NA	NA	NA	NA	NA
HyS0020.236	0	2.67114	0.643	0.005	0	Epithelial Cells	3	enEp/ecEp	NA	NA	NA	NA	NA	XP_002165741.1 PREDICTED: selenoprotein P-like [Hydra vulgaris]	1.4e-32	OG0007058	34	23	NA	NA	NA	NA	NA	NA
HyS0020.271	0	2.33211	0.445	0.009	0	Epithelial Cells	3	enEp/ecEp	NA	NA	NA	NA	NA	NA	NA	OG0022103	3	2	YES	YES	YES	YES	NA	NA
HyS0021.116	0	2.25736	0.672	0.041	0	Epithelial Cells	3	enEp/ecEp	Microsomal glutathione S-transferase	MGST1	prostaglandin-E synthase activity	cellular response to lipid hydroperoxide	integral component of membrane	ADF45336.1 microsomal glutathione-s-transferase [Azumapecten farreri]	1.5e-25	OG0002037	76	33	NA	NA	NA	NA	NA	NA
HyS0021.135	0	1.60679	0.495	0.042	0	Epithelial Cells	3	enEp/ecEp	NA	NA	NA	NA	NA	XP_012555456.1 PREDICTED: girdin-like [Hydra vulgaris]	1.3e-75	OG0012862	8	8	YES	YES	NA	NA	NA	NA
HyS0021.141	0	1.42643	0.351	0.017	0	Epithelial Cells	3	enEp/ecEp	von Willebrand factor D and EGF domain-containing protein (Fragment)	NA	calcium ion binding	NA	NA	XP_012555527.1 PREDICTED: von Willebrand factor D and EGF domain-containing protein-like, partial [Hydra vulgaris]	0	OG0000323	280	31	NA	NA	NA	NA	NA	NA
HyS0021.221	0	2.13764	0.526	0.015	0	Epithelial Cells	3	enEp/ecEp	Leukocyte elastase inhibitor	SERPINB1	serine-type endopeptidase inhibitor activity	type B pancreatic cell proliferation	extracellular space	Q6J201.1 RecName: Full=Serine protease inhibitor; AltName: Full=Jellypin; Short=JP; Flags: Precursor	2.9e-67	OG0000196	390	41	NA	NA	NA	NA	NA	NA
HyS0021.88	0	1.23072	0.309	0.004	0	Epithelial Cells	3	enEp/ecEp	FZ domain-containing protein (Fragment)	NA	Wnt-activated receptor activity	multicellular organism development	NA	XP_002163691.2 PREDICTED: frizzled-8-like [Hydra vulgaris]	3.5e-23	OG0000188	403	42	NA	NA	NA	NA	NA	NA
HyS0022.101	2.98e-233	1.06195	0.33	0.026	6.57e-229	Epithelial Cells	3	enEp/ecEp	IQ domain-containing protein containing GTPase activating protein, variant	NA	aspartic-type endopeptidase activity	regulation of GTPase activity	kinetochore	XP_012561105.1 PREDICTED: GTPase-activating protein-like isoform X1 [Hydra vulgaris]	5e-307	OG0008015	26	20	NA	NA	NA	NA	NA	NA
HyS0022.12	0	2.00548	0.586	0.021	0	Epithelial Cells	3	enEp/ecEp	NA	NA	NA	NA	NA	OGT06286.1 hypothetical protein A2X78_01415 [Gammaproteobacteria bacterium GWE2_37_16]	4.1e-12	OG0023430	3	2	YES	YES	YES	YES	YES	NA
HyS0022.237	0	1.35617	0.433	0.013	0	Epithelial Cells	3	enEp/ecEp	NA	NA	NA	NA	NA	NA	NA	OG0022187	3	3	YES	YES	YES	YES	NA	NA
HyS0022.85	0	3.36671	0.755	0.016	0	Epithelial Cells	3	enEp/ecEp	Glucose/arabinose dehydrogenase, beta-propeller fold	NA	catalytic activity	NA	NA	NA	NA	OG0031322	2	2	YES	YES	YES	YES	YES	NA
HyS0023.145	0	1.69531	0.394	0.006	0	Epithelial Cells	3	enEp/ecEp	NA	NA	NA	NA	NA	NA	NA	OG0022119	3	3	YES	YES	YES	YES	NA	NA
HyS0023.77	0	1.24773	0.311	0.008	0	Epithelial Cells	3	enEp/ecEp	FMRFamide receptor	NA	G protein-coupled receptor activity	G protein-coupled receptor signaling pathway	integral component of membrane	XP_002160368.1 PREDICTED: probable G-protein coupled receptor 139 [Hydra vulgaris]	7.6e-101	OG0000092	590	29	NA	NA	NA	NA	NA	NA
HyS0024.191	1.17e-269	1.04775	0.361	0.026	2.59e-265	Epithelial Cells	3	enEp/ecEp	NA	NA	NA	NA	NA	XP_012557761.1 PREDICTED: uncharacterized protein LOC105845024 [Hydra vulgaris]	6.1e-63	OG0008063	26	5	YES	YES	NA	NA	NA	NA
HyS0024.222	0	1.13363	0.336	0.013	0	Epithelial Cells	3	enEp/ecEp	Collagen alpha chain	NA	extracellular matrix structural constituent	extracellular matrix organization	collagen trimer	XP_012563635.1 PREDICTED: collagen alpha-1(II) chain-like [Hydra vulgaris]	1.7e-56	OG0000318	282	37	NA	NA	NA	NA	NA	NA
HyS0024.234	0	0.996324	0.289	0.006	0	Epithelial Cells	3	enEp/ecEp	NA	NA	NA	NA	NA	NA	NA	OG0031008	2	2	YES	YES	YES	YES	YES	NA
HyS0024.89	0	2.31864	0.586	0.007	0	Epithelial Cells	3	enEp/ecEp	hemicentin-2 isoform X1	HMCN2	calcium ion binding	NA	NA	XP_002165061.2 PREDICTED: hemicentin-1-like [Hydra vulgaris]	1.8e-62	OG0000024	1202	47	NA	NA	NA	NA	NA	NA
HyS0025.217	0	3.35423	0.621	0.02	0	Epithelial Cells	3	enEp/ecEp	ADAM metallopeptidase with thrombospondin type 1 motif, 9	NA	metalloendopeptidase activity	pancreas regeneration	NA	XP_012554423.1 PREDICTED: uncharacterized protein LOC100208216, partial [Hydra vulgaris]	0	OG0000049	912	40	NA	NA	NA	NA	NA	NA
HyS0026.176	0	1.19525	0.334	0.002	0	Epithelial Cells	3	enEp/ecEp	NA	NA	NA	NA	NA	NP_001296582.1 ephrin type-B receptor 1-B-like [Hydra vulgaris]	6e-20	OG0016510	5	4	YES	YES	YES	NA	NA	NA
HyS0026.70	0	2.99107	0.631	0.017	0	Epithelial Cells	3	enEp/ecEp	NA	NA	NA	NA	NA	NA	NA	OG0009592	17	3	NA	NA	NA	NA	NA	NA
HyS0027.145	0	2.9839	0.68	0.032	0	Epithelial Cells	3	enEp/ecEp	NA	NA	NA	NA	NA	NA	NA	OG0030826	2	2	YES	YES	YES	YES	YES	NA
HyS0027.220	0	1.06257	0.291	0.002	0	Epithelial Cells	3	enEp/ecEp	NA	NA	NA	NA	NA	XP_011672427.1 PREDICTED: uncharacterized skeletal organic matrix protein 8-like [Strongylocentrotus purpuratus]	0.00047	OG0006437	40	6	NA	NA	NA	NA	NA	NA
HyS0028.144	4.87e-304	1.12588	0.311	0.014	1.07e-299	Epithelial Cells	3	enEp/ecEp	NA	NA	NA	NA	NA	XP_004207050.1 PREDICTED: uncharacterized protein LOC101236484 [Hydra vulgaris]	2e-41	OG0003955	55	12	YES	NA	NA	NA	NA	NA
HyS0028.161	0	1.42176	0.388	0.014	0	Epithelial Cells	3	enEp/ecEp	Mucosa-associated lymphoid tissue lymphoma translocation protein 1 (Fragment)	NA	cysteine-type endopeptidase activity	proteolysis	NA	XP_002158339.1 PREDICTED: mucosa-associated lymphoid tissue lymphoma translocation protein 1-like [Hydra vulgaris]	3.3e-167	OG0001559	91	39	NA	NA	NA	NA	NA	NA
HyS0028.199	0	1.80324	0.447	0.008	0	Epithelial Cells	3	enEp/ecEp	NA	NA	NA	NA	NA	XP_012561773.1 PREDICTED: epithelial membrane protein 1-like [Hydra vulgaris]	2.1e-15	OG0010681	13	5	YES	YES	NA	NA	NA	NA
HyS0028.230	0	3.04697	0.672	0.045	0	Epithelial Cells	3	enEp/ecEp	Hematopoietic prostaglandin D synthase	NA	transferase activity	NA	NA	XP_002158423.1 PREDICTED: probable glutathione S-transferase 7 [Hydra vulgaris]	1.1e-43	OG0000129	502	48	NA	NA	NA	NA	NA	NA
HyS0028.239	0	1.39113	0.431	0.014	0	Epithelial Cells	3	enEp/ecEp	Lipopolysaccharide-induced TNF factor 7	LOC106164403	NA	NA	integral component of membrane	XP_028402599.1 cell death-inducing p53-target protein 1 homolog [Dendronephthya gigantea]	1.5e-16	OG0000383	241	44	NA	NA	NA	NA	NA	NA
HyS0028.34	7.41e-246	1.31955	0.429	0.043	1.63e-241	Epithelial Cells	3	enEp/ecEp	NA	NA	NA	NA	NA	XP_012553488.1 PREDICTED: uncharacterized protein LOC100197998 [Hydra vulgaris]	2.1e-15	OG0018649	4	4	YES	YES	YES	NA	NA	NA
HyS0029.101	0	1.21535	0.377	0.008	0	Epithelial Cells	3	enEp/ecEp	Muscle RAS oncogene homolog	MRAS	GTPase activity	signal transduction	membrane	XP_004212542.1 PREDICTED: uncharacterized protein LOC101236724 [Hydra vulgaris]	8.5e-20	OG0023278	3	3	YES	YES	YES	NA	NA	NA
HyS0029.104	0	0.788234	0.309	0.012	0	Epithelial Cells	3	enEp/ecEp	NA	NA	NA	NA	NA	XP_002165007.3 PREDICTED: leiomodin-3-like [Hydra vulgaris]	7.6e-85	OG0001225	108	43	NA	NA	NA	NA	NA	NA
HyS0029.135	0	3.04046	0.441	0.006	0	Epithelial Cells	3	enEp/ecEp	Peptidyl-prolyl cis-trans isomerase A (Rotamase A)	NA	carbohydrate binding	melanin biosynthetic process	melanosome membrane	PIK56733.1 hypothetical protein BSL78_06375 [Apostichopus japonicus]	8.7e-69	OG0001326	102	27	NA	NA	NA	NA	NA	NA
HyS0030.197	0	2.57776	0.656	0.032	0	Epithelial Cells	3	enEp/ecEp	NA	NA	NA	NA	NA	KXJ09044.1 hypothetical protein AC249_AIPGENE26930 [Exaiptasia pallida]	3e-12	OG0017112	5	3	YES	NA	NA	NA	NA	NA
HyS0031.177	0	1.34559	0.371	0.01	0	Epithelial Cells	3	enEp/ecEp	NA	NA	NA	NA	NA	XP_012554356.1 PREDICTED: TNF receptor-associated factor 5-like [Hydra vulgaris]	6.4e-16	OG0000030	1121	44	NA	NA	NA	NA	NA	NA
HyS0031.62	1.27e-277	1.33348	0.278	0.012	2.8e-273	Epithelial Cells	3	enEp/ecEp	NA	NA	NA	NA	NA	NA	NA	OG0014973	6	4	YES	YES	YES	NA	NA	NA
HyS0031.63	4.77e-274	1.29931	0.276	0.012	1.05e-269	Epithelial Cells	3	enEp/ecEp	NA	NA	NA	NA	NA	XP_012563487.1 PREDICTED: uncharacterized protein PFB0145c-like [Hydra vulgaris]	1.2e-17	OG0014973	6	4	YES	YES	YES	NA	NA	NA
HyS0032.149	0	1.57198	0.456	0.035	0	Epithelial Cells	3	enEp/ecEp	Ras GTPase-activating protein SynGAP	NA	GTPase activator activity	regulation of GTPase activity	apical cortex	XP_002157079.2 PREDICTED: ras GTPase-activating protein nGAP-like [Hydra vulgaris]	2.8e-261	OG0000412	228	48	NA	NA	NA	NA	NA	NA
HyS0033.182	1.04e-251	1.17386	0.297	0.017	2.3e-247	Epithelial Cells	3	enEp/ecEp	NA	NA	NA	NA	NA	NA	NA	OG0030648	2	2	YES	YES	YES	YES	YES	NA
HyS0034.148	0	1.23702	0.307	0.002	0	Epithelial Cells	3	enEp/ecEp	SOX transcription factor	NA	DNA binding	cell differentiation	nucleus	APW77285.1 SoxF1 [Hydractinia echinata]	3.3e-229	OG0000080	630	46	NA	NA	NA	NA	NA	NA
HyS0034.215	0	3.33652	0.52	0.014	0	Epithelial Cells	3	enEp/ecEp	NA	NA	NA	NA	NA	XP_020616832.1 protocadherin Fat 4-like [Orbicella faveolata]	0	OG0000016	1416	45	NA	NA	NA	NA	NA	NA
HyS0035.29	0	1.30896	0.367	0.007	0	Epithelial Cells	3	enEp/ecEp	MAM domain-containing glycosylphosphatidylinositol anchor protein 1	MDGA1	scavenger receptor activity	regulation of synaptic membrane adhesion	anchored component of plasma membrane	XP_012558890.1 PREDICTED: MAM and LDL-receptor class A domain-containing protein 1-like [Hydra vulgaris]	1.6e-204	OG0000111	539	38	NA	NA	NA	NA	NA	NA
HyS0035.30	0	1.20943	0.318	0.003	0	Epithelial Cells	3	enEp/ecEp	MAM domain containing glycosylphosphatidylinositol anchor 1	NA	scavenger receptor activity	endocytosis	extracellular region	XP_012558890.1 PREDICTED: MAM and LDL-receptor class A domain-containing protein 1-like [Hydra vulgaris]	0	OG0000111	539	38	NA	NA	NA	NA	NA	NA
HyS0035.77	0	0.85826	0.26	0.002	0	Epithelial Cells	3	enEp/ecEp	MAM and LDL-receptor class A domain-containing protein 1	NA	metalloendopeptidase activity	proteolysis	membrane	XP_020909865.1 A disintegrin and metalloproteinase with thrombospondin motifs 3-like isoform X2 [Exaiptasia pallida]	5.3e-145	OG0000094	589	42	NA	NA	NA	NA	NA	NA
HyS0036.159	0	4.80719	0.874	0.046	0	Epithelial Cells	3	enEp/ecEp	NA	NA	NA	NA	NA	OCA52001.1 hypothetical protein XENTR_v90003615mg [Xenopus tropicalis]	3.9e-06	OG0022201	3	3	YES	YES	YES	YES	NA	NA
HyS0036.92	0	4.98894	0.753	0.04	0	Epithelial Cells	3	enEp/ecEp	NA	NA	NA	NA	NA	XP_012555900.1 PREDICTED: apolipophorins-like, partial [Hydra vulgaris]	0	OG0001018	121	38	NA	NA	NA	NA	NA	NA
HyS0038.113	8.47e-226	1.019	0.34	0.028	1.87e-221	Epithelial Cells	3	enEp/ecEp	NA	NA	NA	NA	NA	XP_012564530.1 PREDICTED: UDP-GlcNAc:betaGal beta-1,3-N-acetylglucosaminyltransferase 7-like isoform X1 [Hydra vulgaris]	1.3e-71	OG0000050	911	45	NA	NA	NA	NA	NA	NA
HyS0038.129	2.21e-272	0.768637	0.299	0.015	4.88e-268	Epithelial Cells	3	enEp/ecEp	Molecular chaperone Tir	NA	1-phosphatidylinositol-4-phosphate 5-kinase activity	phosphatidylinositol phosphorylation	motile cilium	XP_001637192.1 predicted protein [Nematostella vectensis]	2.5e-07	OG0001267	105	40	NA	NA	NA	NA	NA	NA
HyS0038.44	0	1.78335	0.429	0.022	0	Epithelial Cells	3	enEp/ecEp	Collagen alpha-6(VI) chain	NA	NA	NA	collagen trimer	XP_012563136.1 PREDICTED: collagen alpha-5(VI) chain-like, partial [Hydra vulgaris]	1.6e-33	OG0012405	9	4	YES	YES	NA	NA	NA	NA
HyS0039.6	0	2.36943	0.625	0.02	0	Epithelial Cells	3	enEp/ecEp	NA	NA	NA	NA	NA	XP_015780019.1 PREDICTED: uncharacterized protein LOC107357901 [Acropora digitifera]	2.2e-14	OG0000306	290	34	NA	NA	NA	NA	NA	NA
HyS0039.82	0	1.65744	0.466	0.017	0	Epithelial Cells	3	enEp/ecEp	Alpha-1A adrenergic receptor	NA	G protein-coupled receptor activity	G protein-coupled receptor signaling pathway	integral component of membrane	XP_012555625.1 PREDICTED: alpha-1A adrenergic receptor-like [Hydra vulgaris]	5.1e-71	OG0000007	2094	42	NA	NA	NA	NA	NA	NA
HyS0040.189	1.58e-251	1.1366	0.365	0.029	3.47e-247	Epithelial Cells	3	enEp/ecEp	Glypican-6	NA	NA	regulation of signal transduction	anchored component of plasma membrane	XP_002157574.3 PREDICTED: glypican-6-like [Hydra vulgaris]	8.5e-114	OG0001273	105	41	NA	NA	NA	NA	NA	NA
HyS0040.41	0	2.94767	0.703	0.033	0	Epithelial Cells	3	enEp/ecEp	NA	NA	NA	NA	NA	NA	NA	OG0031482	2	2	YES	YES	YES	YES	YES	NA
HyS0041.39	0	1.08296	0.322	0.009	0	Epithelial Cells	3	enEp/ecEp	NA	NA	NA	NA	NA	XP_011678966.1 PREDICTED: fibropellin-1-like, partial [Strongylocentrotus purpuratus]	3e-07	OG0012956	8	5	NA	NA	NA	NA	NA	NA
HyS0041.83	0	3.18445	0.685	0.039	0	Epithelial Cells	3	enEp/ecEp	NA	NA	NA	NA	NA	NA	NA	OG0031176	2	2	YES	YES	YES	YES	YES	NA
HyS0042.106	0	0.77198	0.26	0.002	0	Epithelial Cells	3	enEp/ecEp	NA	NA	NA	NA	NA	XP_012560164.1 PREDICTED: VPS10 domain-containing receptor SorCS1-like [Hydra vulgaris]	1.5e-195	OG0000607	172	46	NA	NA	NA	NA	NA	NA
HyS0042.116	0	1.43661	0.421	0.003	0	Epithelial Cells	3	enEp/ecEp	Innexin	INX	NA	ion transport	gap junction	NP_001274699.1 innexin inx1-like [Hydra vulgaris]	3.3e-84	OG0001165	112	6	NA	NA	NA	NA	NA	NA
HyS0042.127	0	1.56225	0.357	0.007	0	Epithelial Cells	3	enEp/ecEp	NA	NA	NA	NA	NA	XP_004206032.2 PREDICTED: uncharacterized protein LOC101235893 [Hydra vulgaris]	4.5e-20	OG0010369	14	5	YES	YES	NA	NA	NA	NA
HyS0042.166	0	1.6611	0.386	0.005	0	Epithelial Cells	3	enEp/ecEp	Outer membrane protein OmpA	NA	calcium ion binding	polysaccharide catabolic process	cell outer membrane	TFG50771.1 hypothetical protein E4H40_00575 [Candidatus Brocadiae bacterium]	4.1e-18	OG0010009	15	5	YES	YES	NA	NA	NA	NA
HyS0045.101	0	3.15167	0.746	0.031	0	Epithelial Cells	3	enEp/ecEp	NA	NA	NA	NA	NA	NA	NA	OG0031363	2	2	YES	YES	YES	YES	YES	NA
HyS0045.126	0	1.68851	0.505	0.005	0	Epithelial Cells	3	enEp/ecEp	NA	NA	NA	NA	NA	NA	NA	OG0022050	3	3	YES	YES	YES	YES	NA	NA
HyS0045.53	0	1.3917	0.355	0.002	0	Epithelial Cells	3	enEp/ecEp	Latent-transforming growth factor beta-binding protein 1 (Fragment)	FBLN1	calcium ion binding	extracellular matrix organization	extracellular region	XP_027038922.1 uncharacterized protein LOC113667311 [Pocillopora damicornis]	4.2e-117	OG0000105	555	43	NA	NA	NA	NA	NA	NA
HyS0046.24	0	1.48496	0.505	0.029	0	Epithelial Cells	3	enEp/ecEp	NA	NA	NA	NA	NA	XP_012560773.1 PREDICTED: four and a half LIM domains protein 2-like [Hydra vulgaris]	8e-70	OG0000388	239	45	NA	NA	NA	NA	NA	NA
HyS0047.116	0	1.199	0.369	0.009	0	Epithelial Cells	3	enEp/ecEp	NA	NA	NA	NA	NA	NA	NA	OG0018662	4	3	YES	YES	YES	YES	NA	NA
HyS0047.128	0	0.899876	0.309	0.004	0	Epithelial Cells	3	enEp/ecEp	Betaine homocysteine S-methyltransferase	NA	betaine-homocysteine S-methyltransferase activity	methionine biosynthetic process	cytoplasm	XP_027045506.1 S-methylmethionine--homocysteine S-methyltransferase BHMT2-like [Pocillopora damicornis]	8.9e-105	OG0000612	171	35	NA	NA	NA	NA	NA	NA
HyS0047.87	0	1.64751	0.464	0.021	0	Epithelial Cells	3	enEp/ecEp	Calmodulin mRNA	NA	calcium ion binding	calcium-mediated signaling	spindle microtubule	XP_020774942.1 calmodulin-alpha-like [Boleophthalmus pectinirostris]	5e-33	OG0000027	1167	49	NA	NA	NA	NA	NA	NA
HyS0048.107	0	2.48336	0.548	0.007	0	Epithelial Cells	3	enEp/ecEp	NA	NA	NA	NA	NA	XP_012554826.1 PREDICTED: uncharacterized protein LOC100205133 [Hydra vulgaris]	2.8e-44	OG0006179	42	7	YES	YES	NA	NA	NA	NA
HyS0048.37	0	2.29717	0.353	0.006	0	Epithelial Cells	3	enEp/ecEp	NA	NA	NA	NA	NA	PIO38759.1 Inhibin beta B chain [Rana catesbeiana]	5.9e-20	OG0000138	477	43	NA	NA	NA	NA	NA	NA
HyS0048.53	1.98e-233	0.908221	0.287	0.018	4.36e-229	Epithelial Cells	3	enEp/ecEp	Chitin synthase II	NA	transferase activity, transferring hexosyl groups	histone acetylation	cell septum	XP_012554922.1 PREDICTED: uncharacterized protein LOC100206524 [Hydra vulgaris]	0	OG0000735	150	37	NA	NA	NA	NA	NA	NA
HyS0048.85	0	1.15157	0.27	0.006	0	Epithelial Cells	3	enEp/ecEp	NA	NA	NA	NA	NA	KXJ18690.1 HMG domain-containing protein 3 [Exaiptasia pallida]	3.5e-06	OG0010811	12	11	YES	NA	NA	NA	NA	NA
HyS0048.88	0	1.14118	0.252	0.003	0	Epithelial Cells	3	enEp/ecEp	Ankyrin domain containing protein	NA	NA	NA	NA	XP_012555106.1 PREDICTED: myotrophin-like [Hydra vulgaris]	3.7e-08	OG0014933	6	4	YES	YES	YES	NA	NA	NA
HyS0049.147	1.37e-237	0.950013	0.361	0.03	3.03e-233	Epithelial Cells	3	enEp/ecEp	NA	NA	NA	NA	NA	NA	NA	OG0023584	3	2	YES	YES	YES	YES	YES	NA
HyS0049.74	2.91e-258	1.3529	0.435	0.043	6.42e-254	Epithelial Cells	3	enEp/ecEp	Epidermal growth factor receptor kinase substrate 8	NA	Rac guanyl-nucleotide exchange factor activity	positive regulation of ruffle assembly	ruffle membrane	XP_012557567.1 PREDICTED: epidermal growth factor receptor kinase substrate 8-like isoform X1 [Hydra vulgaris]	1.7e-111	OG0001749	84	42	NA	NA	NA	NA	NA	NA
HyS0050.39	0	2.17823	0.602	0.026	0	Epithelial Cells	3	enEp/ecEp	NA	NA	NA	NA	NA	XP_012558038.1 PREDICTED: uncharacterized protein LOC100201401 isoform X2 [Hydra vulgaris]	7.1e-10	OG0031484	2	2	YES	YES	YES	YES	YES	NA
HyS0053.106	1.25e-213	1.50854	0.336	0.03	2.76e-209	Epithelial Cells	3	enEp/ecEp	TIR domain-containing protein	NA	NA	signal transduction	integral component of membrane	WP_011398545.1 hypothetical protein [Hahella chejuensis]	3e-32	OG0011033	12	6	NA	NA	NA	NA	NA	NA
HyS0053.113	9.13e-231	2.429	0.301	0.02	2.01e-226	Epithelial Cells	3	enEp/ecEp	Avidin	NA	biotin binding	NA	NA	PPQ65800.1 hypothetical protein CVT26_000390 [Gymnopilus dilepis]	5.9e-13	OG0003982	54	27	NA	NA	NA	NA	NA	NA
HyS0053.33	0	1.08191	0.32	0.004	0	Epithelial Cells	3	enEp/ecEp	GTPase HRas	NA	GTPase activity	signal transduction	membrane	XP_002156360.3 PREDICTED: ras-related and estrogen-regulated growth inhibitor-like [Hydra vulgaris]	1e-58	OG0018607	4	4	YES	YES	YES	NA	NA	NA
HyS0053.75	0	1.2971	0.313	0.005	0	Epithelial Cells	3	enEp/ecEp	Collagen alpha-6(VI) chain	NA	NA	NA	collagen trimer	XP_022795933.1 uncharacterized protein LOC111334458 [Stylophora pistillata]	0	OG0000049	912	40	NA	NA	NA	NA	NA	NA
HyS0053.98	0	1.59807	0.445	0.009	0	Epithelial Cells	3	enEp/ecEp	FERM, RhoGEF and pleckstrin domain-containing protein 2	CTSZ	cysteine-type peptidase activity	proteolysis	lysosome	XP_020909297.1 patched domain-containing protein 3-like [Exaiptasia pallida]	3e-151	OG0002331	70	39	NA	NA	NA	NA	NA	NA
HyS0054.133	0	1.59692	0.371	0.005	0	Epithelial Cells	3	enEp/ecEp	NA	NA	NA	NA	NA	NA	NA	OG0030644	2	2	YES	YES	YES	YES	YES	NA
HyS0054.49	0	1.76663	0.318	0.01	0	Epithelial Cells	3	enEp/ecEp	NA	NA	NA	NA	NA	NA	NA	OG0011262	11	7	YES	YES	NA	NA	NA	NA
HyS0055.110	3e-278	1.80804	0.346	0.022	6.62e-274	Epithelial Cells	3	enEp/ecEp	NA	NA	NA	NA	NA	NA	NA	OG0017068	5	2	YES	YES	YES	YES	YES	NA
HyS0055.111	0	2.1081	0.367	0.012	0	Epithelial Cells	3	enEp/ecEp	NA	NA	NA	NA	NA	NA	NA	Unassigned	NA	NA	NA	NA	NA	NA	NA	NA
HyS0055.15	1.01e-271	1.04221	0.268	0.011	2.23e-267	Epithelial Cells	3	enEp/ecEp	NA	NA	NA	NA	NA	NA	NA	OG0022079	3	3	YES	YES	YES	YES	NA	NA
HyS0055.20	0	1.17517	0.342	0.005	0	Epithelial Cells	3	enEp/ecEp	NA	NA	NA	NA	NA	NA	NA	OG0030973	2	2	YES	YES	YES	YES	YES	NA
HyS0055.39	0	1.40683	0.447	0.002	0	Epithelial Cells	3	enEp/ecEp	Innexin	NA	NA	ion transport	gap junction	XP_002166931.2 PREDICTED: innexin inx2-like [Hydra vulgaris]	8.1e-99	OG0001165	112	6	NA	NA	NA	NA	NA	NA
HyS0055.49	0	1.29257	0.379	0.014	0	Epithelial Cells	3	enEp/ecEp	NA	NA	NA	NA	NA	NA	NA	OG0018612	4	4	YES	YES	NA	NA	NA	NA
HyS0056.62	0	1.14466	0.379	0.024	0	Epithelial Cells	3	enEp/ecEp	zonadhesin	NA	chitin binding	chitin metabolic process	extracellular region	XP_002164217.2 PREDICTED: dystroglycan-like [Hydra vulgaris]	7.4e-90	OG0000929	128	39	NA	NA	NA	NA	NA	NA
HyS0058.8	0	1.5015	0.412	0.016	0	Epithelial Cells	3	enEp/ecEp	Ets domain transcription factor	NA	sequence-specific DNA binding	regulation of transcription, DNA-templated	nucleus	XP_002163608.2 PREDICTED: transcriptional regulator ERG-like isoform X2 [Hydra vulgaris]	1e-180	OG0000089	597	44	NA	NA	NA	NA	NA	NA
HyS0060.57	0	1.72725	0.526	0.037	0	Epithelial Cells	3	enEp/ecEp	Putative serine/threonine protein phosphatase signal transduction mechanism	NA	catalytic activity	chloride transmembrane transport	integral component of membrane	XP_012557786.1 PREDICTED: uncharacterized protein LOC100206966 [Hydra vulgaris]	7.8e-83	OG0005895	44	33	NA	NA	NA	NA	NA	NA
HyS0061.72	2.59e-265	1.48619	0.377	0.029	5.71e-261	Epithelial Cells	3	enEp/ecEp	Phosphodiesterase	NA	3',5'-cyclic-nucleotide phosphodiesterase activity	signal transduction	perinuclear region of cytoplasm	XP_002168015.3 PREDICTED: cAMP-specific 3',5'-cyclic phosphodiesterase 4C-like [Hydra vulgaris]	6.7e-233	OG0000251	331	48	NA	NA	NA	NA	NA	NA
HyS0062.129	0	3.00189	0.685	0.021	0	Epithelial Cells	3	enEp/ecEp	Ras domain containing protein	NA	GTPase activity	NA	NA	XP_002165300.1 PREDICTED: ras-related protein Rab-31-like [Hydra vulgaris]	4.2e-64	OG0014609	6	6	YES	YES	NA	NA	NA	NA
HyS0062.29	0	1.95941	0.452	0.032	0	Epithelial Cells	3	enEp/ecEp	Nose resistant to fluoxetine protein 6	NA	transferase activity, transferring acyl groups other than amino-acyl groups	ionotropic glutamate receptor signaling pathway	integral component of membrane	XP_012560394.1 PREDICTED: nose resistant to fluoxetine protein 6-like [Hydra vulgaris]	1.1e-159	OG0000236	346	42	NA	NA	NA	NA	NA	NA
HyS0062.7	0	1.00126	0.282	0.002	0	Epithelial Cells	3	enEp/ecEp	Carbohydrate sulfotransferase	CHST12	sulfotransferase activity	carbohydrate biosynthetic process	Golgi membrane	XP_004205990.2 PREDICTED: carbohydrate sulfotransferase 11-like [Hydra vulgaris]	1.4e-63	OG0000177	415	37	NA	NA	NA	NA	NA	NA
HyS0064.26	1.59e-257	1.07692	0.365	0.029	3.5e-253	Epithelial Cells	3	enEp/ecEp	NA	NA	NA	NA	NA	NA	NA	OG0016477	5	3	YES	YES	YES	YES	NA	NA
HyS0064.31	0	2.25088	0.703	0.035	0	Epithelial Cells	3	enEp/ecEp	Shell matrix protein	NA	NA	NA	NA	NA	NA	OG0030689	2	2	YES	YES	YES	YES	YES	NA
HyS0064.41	4.05e-267	0.844047	0.315	0.018	8.93e-263	Epithelial Cells	3	enEp/ecEp	Sodium myo-inositol cotransporter 2	SLC5A11	transmembrane transporter activity	transmembrane transport	integral component of membrane	XP_012560407.1 PREDICTED: sodium/glucose cotransporter 5-like isoform X1 [Hydra vulgaris]	6.1e-264	OG0000484	203	35	NA	NA	NA	NA	NA	NA
HyS0064.44	7.11e-245	0.822873	0.264	0.013	1.57e-240	Epithelial Cells	3	enEp/ecEp	SEA domain-containing protein	NA	cellulose binding	chitin metabolic process	extracellular region	NA	NA	OG0018610	4	3	YES	YES	YES	YES	NA	NA
HyS0065.32	7.44e-278	1.44055	0.46	0.045	1.64e-273	Epithelial Cells	3	enEp/ecEp	proto-oncogene tyrosine-protein kinase receptor Ret	NA	protein tyrosine kinase activity	peptidyl-tyrosine phosphorylation	dendrite	AZQ04902.1 fibroblast growth factor receptor 1 [Hydra vulgaris]	1e-181	OG0000014	1507	47	NA	NA	NA	NA	NA	NA
HyS0065.33	0	1.99007	0.373	0.012	0	Epithelial Cells	3	enEp/ecEp	NA	NA	NA	NA	NA	XP_028413338.1 uncharacterized protein LOC114536209 [Dendronephthya gigantea]	5.9e-59	OG0010606	13	6	NA	NA	NA	NA	NA	NA
HyS0065.34	6.82e-263	0.943436	0.365	0.027	1.5e-258	Epithelial Cells	3	enEp/ecEp	Innexin	NA	NA	ion transport	gap junction	NP_001274699.1 innexin inx1-like [Hydra vulgaris]	8.2e-129	OG0001165	112	6	NA	NA	NA	NA	NA	NA
HyS0065.37	9.71e-227	1.00292	0.328	0.026	2.14e-222	Epithelial Cells	3	enEp/ecEp	Innexin	NA	NA	ion transport	gap junction	CRX73271.1 Innexin 3 [Hydra vulgaris]	6.9e-112	OG0001165	112	6	NA	NA	NA	NA	NA	NA
HyS0065.38	1.6e-298	0.839759	0.291	0.012	3.52e-294	Epithelial Cells	3	enEp/ecEp	NA	NA	NA	NA	NA	XP_012563922.1 PREDICTED: uncharacterized protein LOC105848383 [Hydra vulgaris]	2.7e-69	OG0000513	196	15	YES	NA	NA	NA	NA	NA
HyS0066.44	0	1.09355	0.285	0.007	0	Epithelial Cells	3	enEp/ecEp	NA	NA	NA	NA	NA	NA	NA	OG0031639	2	2	YES	YES	YES	YES	YES	NA
HyS0067.38	0	4.5135	0.901	0.042	0	Epithelial Cells	3	enEp/ecEp	NA	NA	NA	NA	NA	XP_002167799.2 PREDICTED: uncharacterized protein ZK643.6-like [Hydra vulgaris]	1.5e-38	OG0000696	157	16	NA	NA	NA	NA	NA	NA
HyS0067.66	0	0.960523	0.252	0.006	0	Epithelial Cells	3	enEp/ecEp	alpha-2-macroglobulin	CPAMD8	endopeptidase inhibitor activity	negative regulation of endopeptidase activity	extracellular space	XP_012564458.1 PREDICTED: alpha-1-macroglobulin-like [Hydra vulgaris]	1.7e-242	OG0000153	446	41	NA	NA	NA	NA	NA	NA
HyS0068.78	0	1.92961	0.394	0.004	0	Epithelial Cells	3	enEp/ecEp	Macrophage metalloelastase	NA	metalloendopeptidase activity	proteolysis	extracellular matrix	RMX38859.1 hypothetical protein pdam_00018040 [Pocillopora damicornis]	4.8e-67	OG0000099	579	41	NA	NA	NA	NA	NA	NA
HyS0070.27	0	0.857855	0.268	0.007	0	Epithelial Cells	3	enEp/ecEp	Ezrin Cytovillin	NA	actin binding	regulation of plasma membrane bounded cell projection assembly	cytoskeleton	XP_002160112.1 PREDICTED: radixin-like [Hydra vulgaris]	2.6e-135	OG0000944	127	46	NA	NA	NA	NA	NA	NA
HyS0071.43	0	2.04701	0.528	0.006	0	Epithelial Cells	3	enEp/ecEp	NA	NA	NA	NA	NA	XP_012562820.1 PREDICTED: uncharacterized protein LOC100201479, partial [Hydra vulgaris]	6.2e-17	OG0031012	2	2	YES	YES	YES	YES	YES	NA
HyS0071.69	0	1.99897	0.577	0.005	0	Epithelial Cells	3	enEp/ecEp	Matrix metalloproteinase-16	MMP16	metalloendopeptidase activity	proteolysis	extracellular matrix	XP_020618491.1 collagenase 3-like [Orbicella faveolata]	7.8e-41	OG0000099	579	41	NA	NA	NA	NA	NA	NA
HyS0071.70	0	3.27041	0.707	0.008	0	Epithelial Cells	3	enEp/ecEp	Macrophage metalloelastase	NA	metalloendopeptidase activity	proteolysis	extracellular matrix	XP_020618480.1 matrix metalloproteinase-24-like [Orbicella faveolata]	7.4e-79	OG0000099	579	41	NA	NA	NA	NA	NA	NA
HyS0072.9	0	1.56807	0.315	0.01	0	Epithelial Cells	3	enEp/ecEp	NA	NA	NA	NA	NA	NA	NA	OG0030883	2	2	YES	YES	YES	YES	YES	NA
HyS0073.18	0	3.26862	0.565	0.037	0	Epithelial Cells	3	enEp/ecEp	TNF receptor-associated factor	NA	tumor necrosis factor receptor binding	regulation of apoptotic process	CD40 receptor complex	XP_012566091.1 PREDICTED: TNF receptor-associated factor 5-like [Hydra vulgaris]	1e-58	OG0000030	1121	44	NA	NA	NA	NA	NA	NA
HyS0073.90	0	1.20138	0.379	0.005	0	Epithelial Cells	3	enEp/ecEp	NA	NA	NA	NA	NA	XP_012554031.1 PREDICTED: uncharacterized protein LOC100201456 [Hydra vulgaris]	5.4e-17	OG0011266	11	8	YES	YES	NA	NA	NA	NA
HyS0073.96	0	2.61338	0.588	0.006	0	Epithelial Cells	3	enEp/ecEp	OmpA-like domain-containing protein	NA	calcium ion binding	cell adhesion	cell outer membrane	XP_002154415.1 PREDICTED: beta-amyloid-like protein [Hydra vulgaris]	9.5e-47	OG0023605	3	2	YES	YES	YES	YES	YES	NA
HyS0075.14	6.06e-236	0.942564	0.297	0.019	1.34e-231	Epithelial Cells	3	enEp/ecEp	Serine/arginine repetitive matrix protein 5	NA	DNA binding	nucleosome assembly	nucleosome	XP_004206107.1 PREDICTED: uncharacterized protein LOC101239318 [Hydra vulgaris]	9.9e-31	OG0007725	28	22	NA	NA	NA	NA	NA	NA
HyS0075.19	0	1.44098	0.485	0.035	0	Epithelial Cells	3	enEp/ecEp	Phospholipase ABHD3	NA	NA	NA	NA	XP_027050676.1 phospholipase ABHD3-like [Pocillopora damicornis]	1.2e-62	OG0000627	169	47	NA	NA	NA	NA	NA	NA
HyS0076.54	0	1.74554	0.532	0.011	0	Epithelial Cells	3	enEp/ecEp	NA	NA	NA	NA	NA	XP_002154438.2 PREDICTED: contactin-3-like isoform X1 [Hydra vulgaris]	9.3e-89	OG0000116	524	45	NA	NA	NA	NA	NA	NA
HyS0077.2	0	1.03919	0.266	0.003	0	Epithelial Cells	3	enEp/ecEp	NA	NA	NA	NA	NA	PIO34374.1 hypothetical protein AB205_0044100 [Rana catesbeiana]	4.2e-28	OG0030684	2	2	YES	YES	YES	YES	YES	NA
HyS0077.5	0	3.14851	0.555	0.028	0	Epithelial Cells	3	enEp/ecEp	heme-binding protein 2	HEBP2	heme binding	negative regulation of mitochondrial membrane potential	mitochondrion	XP_028413213.1 heme-binding protein 2-like [Dendronephthya gigantea]	4.6e-40	OG0000997	123	33	NA	NA	NA	NA	NA	NA
HyS0078.47	0	1.01284	0.328	0.003	0	Epithelial Cells	3	enEp/ecEp	NA	NA	NA	NA	NA	NA	NA	Unassigned	NA	NA	NA	NA	NA	NA	NA	NA
HyS0078.51	0	3.40021	0.629	0.012	0	Epithelial Cells	3	enEp/ecEp	Metalloendopeptidase	NA	metalloendopeptidase activity	proteolysis	extracellular region	CAJ57449.1 astacin 3 [Hydractinia echinata]	4.9e-170	OG0000004	2368	44	NA	NA	NA	NA	NA	NA
HyS0078.52	0	2.99372	0.602	0.007	0	Epithelial Cells	3	enEp/ecEp	Low choriolytic enzyme	NA	metalloendopeptidase activity	proteolysis	membrane	CAJ57449.1 astacin 3 [Hydractinia echinata]	2.1e-120	OG0000004	2368	44	NA	NA	NA	NA	NA	NA
HyS0078.54	0	2.17033	0.359	0.005	0	Epithelial Cells	3	enEp/ecEp	Metalloendopeptidase	NA	metalloendopeptidase activity	proteolysis	integral component of membrane	CAJ57449.1 astacin 3 [Hydractinia echinata]	9e-57	OG0000004	2368	44	NA	NA	NA	NA	NA	NA
HyS0080.47	0	3.02972	0.707	0.013	0	Epithelial Cells	3	enEp/ecEp	NA	NA	NA	NA	NA	KYN34393.1 Proactivator polypeptide [Trachymyrmex septentrionalis]	3.5e-07	OG0008948	20	10	YES	NA	NA	NA	NA	NA
HyS0083.18	0	4.45236	0.882	0.01	0	Epithelial Cells	3	enEp/ecEp	C-terminal tandem repeated domain in type 4 procollagen	NA	extracellular matrix structural constituent	oviduct morphogenesis	collagen trimer	XP_004212646.1 PREDICTED: collagen alpha-1(IV) chain-like [Hydra vulgaris]	5.8e-85	OG0000827	138	41	NA	NA	NA	NA	NA	NA
HyS0083.19	0	3.81319	0.86	0.008	0	Epithelial Cells	3	enEp/ecEp	Collagen IV alpha 1 chain precursor	NA	extracellular matrix structural constituent	extracellular matrix organization	collagen trimer	XP_012560413.1 PREDICTED: LOW QUALITY PROTEIN: uncharacterized protein LOC100214647 [Hydra vulgaris]	0	OG0000827	138	41	NA	NA	NA	NA	NA	NA
HyS0084.51	0	3.22145	0.515	0.012	0	Epithelial Cells	3	enEp/ecEp	Arginine and serine rich coiled-coil 1	NA	microtubule motor activity	alternative mRNA splicing, via spliceosome	nucleosome	WP_096365289.1 hypothetical protein [Lysinibacillus fusiformis]	2.7e-09	OG0019770	4	2	YES	YES	YES	YES	YES	NA
HyS0084.53	0	2.39455	0.392	0.009	0	Epithelial Cells	3	enEp/ecEp	Arginine and serine rich coiled-coil 1	NA	microtubule motor activity	alternative mRNA splicing, via spliceosome	nucleosome	WP_096365289.1 hypothetical protein [Lysinibacillus fusiformis]	2.7e-09	OG0019770	4	2	YES	YES	YES	YES	YES	NA
HyS0086.34	0	1.92197	0.544	0.033	0	Epithelial Cells	3	enEp/ecEp	NA	NA	NA	NA	NA	XP_012563566.1 PREDICTED: uncharacterized protein LOC105848137 [Hydra vulgaris]	2.3e-91	OG0012840	8	7	YES	YES	NA	NA	NA	NA
HyS0087.37	0	2.7062	0.561	0.008	0	Epithelial Cells	3	enEp/ecEp	Collagen type i ii iii v xi alpha	NA	extracellular matrix structural constituent	negative regulation of endopeptidase activity	collagen trimer	ABG80451.1 fibrillar collagen, partial [Hydra vulgaris]	3.2e-49	OG0000318	282	37	NA	NA	NA	NA	NA	NA
HyS0087.46	0	1.48604	0.487	0.038	0	Epithelial Cells	3	enEp/ecEp	Receptor-type tyrosine-protein phosphatase gamma	NA	protein tyrosine phosphatase activity	peptidyl-tyrosine dephosphorylation	integral component of membrane	XP_020620880.1 receptor-type tyrosine-protein phosphatase delta-like isoform X2 [Orbicella faveolata]	2.6e-292	OG0000020	1291	49	NA	NA	NA	NA	NA	NA
HyS0088.9	0	4.61912	0.874	0.023	0	Epithelial Cells	3	enEp/ecEp	Kazal-type protease inhibitor	NA	calcium ion binding	cell-matrix adhesion	integral component of membrane	XP_012560975.1 PREDICTED: uncharacterized protein LOC101241534 [Hydra vulgaris]	6e-147	OG0000175	416	44	NA	NA	NA	NA	NA	NA
HyS0089.17	0	3.0539	0.658	0.035	0	Epithelial Cells	3	enEp/ecEp	NA	NA	NA	NA	NA	NA	NA	Unassigned	NA	NA	NA	NA	NA	NA	NA	NA
HyS0089.18	0	3.07236	0.757	0.02	0	Epithelial Cells	3	enEp/ecEp	NA	NA	NA	NA	NA	NA	NA	Unassigned	NA	NA	NA	NA	NA	NA	NA	NA
HyS0089.19	0	3.42666	0.837	0.046	0	Epithelial Cells	3	enEp/ecEp	Agrin	NA	laminin binding	receptor clustering	plasma membrane	XP_022198600.1 agrin-like, partial [Nilaparvata lugens]	2.1e-05	OG0000175	416	44	NA	NA	NA	NA	NA	NA
HyS0091.12	0	1.74432	0.567	0.03	0	Epithelial Cells	3	enEp/ecEp	Proline-rich transmembrane protein 1	NA	NA	NA	integral component of membrane	XP_020601695.1 proline-rich transmembrane protein 1-like [Orbicella faveolata]	2.7e-12	OG0000398	235	30	NA	NA	NA	NA	NA	NA
HyS0093.2	0	1.26319	0.359	0.017	0	Epithelial Cells	3	enEp/ecEp	WAP-type 'four-disulfide core	NA	peptidase inhibitor activity	negative regulation of peptidase activity	extracellular region	OWF36203.1 Papilin [Mizuhopecten yessoensis]	5.6e-15	OG0009276	18	13	NA	NA	NA	NA	NA	NA
HyS0093.42	7.71e-213	1.24182	0.406	0.046	1.7e-208	Epithelial Cells	3	enEp/ecEp	LOW QUALITY PROTEIN: unconventional myosin-X	MYO10	actin binding	regulation of filopodium assembly	myosin complex	XP_027057355.1 unconventional myosin-X-like [Pocillopora damicornis]	0	OG0005646	45	31	NA	NA	NA	NA	NA	NA
HyS0095.19	3.26e-305	1.04391	0.348	0.019	7.19e-301	Epithelial Cells	3	enEp/ecEp	NA	NA	NA	NA	NA	NA	NA	OG0018714	4	4	YES	YES	YES	NA	NA	NA
HyS0097.32	0	0.958383	0.315	0.006	0	Epithelial Cells	3	enEp/ecEp	acetylcholinesterase collagenic tail peptide	NA	extracellular matrix structural constituent	extracellular matrix organization	collagen trimer	XP_012557341.1 PREDICTED: uncharacterized protein LOC105844836 [Hydra vulgaris]	1.5e-31	OG0000222	362	25	NA	NA	NA	NA	NA	NA
HyS0098.46	0	2.36782	0.668	0.046	0	Epithelial Cells	3	enEp/ecEp	Transgelin	MP20	actin binding	actomyosin structure organization	actin cytoskeleton	XP_002166699.3 PREDICTED: myophilin-like [Hydra vulgaris]	3e-66	OG0000338	272	49	NA	NA	NA	NA	NA	NA
HyS0099.14	0	1.36231	0.464	0.019	0	Epithelial Cells	3	enEp/ecEp	G-protein coupled receptor 64 (Fragment)	NA	G protein-coupled receptor activity	cell surface receptor signaling pathway	integral component of plasma membrane	XP_020624876.1 uncharacterized protein LOC110062344 isoform X1 [Orbicella faveolata]	1.8e-192	OG0000026	1183	45	NA	NA	NA	NA	NA	NA
HyS0099.24	0	2.78461	0.751	0.035	0	Epithelial Cells	3	enEp/ecEp	NA	NA	NA	NA	NA	NA	NA	OG0011073	12	2	YES	YES	YES	YES	YES	NA
HyS0099.28	0	0.960114	0.311	0.008	0	Epithelial Cells	3	enEp/ecEp	High affinity nerve growth factor receptor	NA	protein tyrosine kinase activity	peptidyl-tyrosine phosphorylation	integral component of plasma membrane	XP_012562957.1 PREDICTED: discoidin domain-containing receptor 2 isoform X2 [Hydra vulgaris]	2.4e-114	OG0000014	1507	47	NA	NA	NA	NA	NA	NA
HyS0100.1	0	2.94683	0.757	0.032	0	Epithelial Cells	3	enEp/ecEp	NA	NA	NA	NA	NA	NA	NA	OG0011073	12	2	YES	YES	YES	YES	YES	NA
HyS0100.15	6.21e-299	1.18801	0.351	0.02	1.37e-294	Epithelial Cells	3	enEp/ecEp	NA	NA	NA	NA	NA	NA	NA	OG0007609	30	2	YES	YES	YES	YES	YES	NA
HyS0100.21	7.02e-303	1.30834	0.384	0.025	1.55e-298	Epithelial Cells	3	enEp/ecEp	NA	NA	NA	NA	NA	NA	NA	OG0007609	30	2	YES	YES	YES	YES	YES	NA
HyS0100.3	0	2.513	0.709	0.036	0	Epithelial Cells	3	enEp/ecEp	NA	NA	NA	NA	NA	NA	NA	OG0011073	12	2	YES	YES	YES	YES	YES	NA
HyS0102.54	0	1.03686	0.252	0.003	0	Epithelial Cells	3	enEp/ecEp	Methyltransferase type 11	NA	methyltransferase activity	methylation	NA	XP_015750992.1 PREDICTED: uncharacterized protein LOC107330975 isoform X1 [Acropora digitifera]	1.8e-23	OG0000362	253	29	NA	NA	NA	NA	NA	NA
HyS0106.1	0	3.41345	0.804	0.03	0	Epithelial Cells	3	enEp/ecEp	NA	NA	NA	NA	NA	NA	NA	Unassigned	NA	NA	NA	NA	NA	NA	NA	NA
HyS0124.10	0	1.31333	0.371	0.004	0	Epithelial Cells	3	enEp/ecEp	Laminin subunit beta-1 (inferred by orthology to a D. melanogaster protein)	LAMB2	integrin binding	basement membrane assembly	laminin complex	XP_002168125.2 PREDICTED: laminin subunit beta-1 [Hydra vulgaris]	0	OG0000090	597	45	NA	NA	NA	NA	NA	NA
HyS0142.11	0	3.79655	0.821	0.028	0	Epithelial Cells	3	enEp/ecEp	Thioester-containing protein-A	NA	endopeptidase inhibitor activity	negative regulation of endopeptidase activity	extracellular space	XP_012564458.1 PREDICTED: alpha-1-macroglobulin-like [Hydra vulgaris]	0	OG0000153	446	41	NA	NA	NA	NA	NA	NA
HyS0148.8	0	1.05102	0.254	0.006	0	Epithelial Cells	3	enEp/ecEp	Leucine-rich repeat protein	NA	NA	NA	NA	NA	NA	OG0008372	24	4	YES	YES	NA	NA	NA	NA
HyS0151.7	0	1.9514	0.542	0.003	0	Epithelial Cells	3	enEp/ecEp	Laminin subunit alpha	HSPG2	calcium ion binding	regulation of embryonic development	basement membrane	XP_004211405.2 PREDICTED: basement membrane-specific heparan sulfate proteoglycan core protein-like, partial [Hydra vulgaris]	0	OG0000090	597	45	NA	NA	NA	NA	NA	NA
HyS0153.7	0	0.893116	0.328	0.005	0	Epithelial Cells	3	enEp/ecEp	NA	NA	NA	NA	NA	XP_004207792.1 PREDICTED: notch-regulated ankyrin repeat-containing protein-like [Hydra vulgaris]	8e-14	OG0000071	667	49	NA	NA	NA	NA	NA	NA
HyS0175.11	0	1.71937	0.47	0.014	0	Epithelial Cells	3	enEp/ecEp	NA	NA	NA	NA	NA	NA	NA	OG0011073	12	2	YES	YES	YES	YES	YES	NA
HyS0183.4	0	1.89715	0.53	0.04	0	Epithelial Cells	3	enEp/ecEp	Parvalbumin	NA	calcium ion binding	calcium-mediated signaling	cytosol	XP_004206928.1 PREDICTED: neo-calmodulin-like isoform X2 [Hydra vulgaris]	2.3e-46	OG0000027	1167	49	NA	NA	NA	NA	NA	NA
HyS0199.4	1.99e-231	1.07569	0.295	0.019	4.37e-227	Epithelial Cells	3	enEp/ecEp	NA	NA	NA	NA	NA	OQS03267.1 hypothetical protein THRCLA_21198 [Thraustotheca clavata]	7.3e-55	OG0011845	10	5	NA	NA	NA	NA	NA	NA
HyS0233.1	0	3.0521	0.577	0.007	0	Epithelial Cells	3	enEp/ecEp	Macrophage metalloelastase	NA	metalloendopeptidase activity	proteolysis	extracellular matrix	XP_020618480.1 matrix metalloproteinase-24-like [Orbicella faveolata]	8.6e-80	OG0000099	579	41	NA	NA	NA	NA	NA	NA
HyS0320.5	0	1.28073	0.348	0.002	0	Epithelial Cells	3	enEp/ecEp	NA	NA	NA	NA	NA	XP_004211296.1 PREDICTED: furin-like protease 2 [Hydra vulgaris]	9.9e-80	OG0011707	10	7	YES	YES	NA	NA	NA	NA
HyS0325.4	0	2.23044	0.639	0.046	0	Epithelial Cells	3	enEp/ecEp	Prickle protein 2	NA	zinc ion binding	Kupffer's vesicle development	integral component of membrane	XP_012556040.1 PREDICTED: testin-like [Hydra vulgaris]	1.3e-124	OG0000388	239	45	NA	NA	NA	NA	NA	NA
HyS0326.4	0	1.6964	0.503	0.016	0	Epithelial Cells	3	enEp/ecEp	NA	NA	NA	NA	NA	KXJ09044.1 hypothetical protein AC249_AIPGENE26930 [Exaiptasia pallida]	3e-12	OG0017112	5	3	YES	NA	NA	NA	NA	NA
HyS0346.4	0	1.63952	0.299	0.002	0	Epithelial Cells	3	enEp/ecEp	Sea star regeneration-associated protease SRAP	NA	serine-type endopeptidase activity	proteolysis	extracellular space	XP_002164216.1 PREDICTED: elastase-1-like [Hydra vulgaris]	4.2e-75	OG0000006	2162	44	NA	NA	NA	NA	NA	NA
HyS0372.3	0	1.12279	0.272	0.002	0	Epithelial Cells	3	enEp/ecEp	NA	NA	NA	NA	NA	EKC37089.1 Bone morphogenetic protein receptor type-2 [Crassostrea gigas]	0.00081	OG0018640	4	3	YES	YES	YES	NA	NA	NA
HyS0382.1	0	2.0126	0.493	0.013	0	Epithelial Cells	3	enEp/ecEp	NA	NA	NA	NA	NA	NA	NA	Unassigned	NA	NA	NA	NA	NA	NA	NA	NA
HyS0428.3	1.08e-242	0.789443	0.276	0.015	2.38e-238	Epithelial Cells	3	enEp/ecEp	NA	NA	NA	NA	NA	XP_012555342.1 PREDICTED: NACHT, LRR and PYD domains-containing protein 3-like [Hydra vulgaris]	4.8e-38	OG0000055	852	24	NA	NA	NA	NA	NA	NA
HyS0628.1	0	1.78265	0.454	0.021	0	Epithelial Cells	3	enEp/ecEp	NA	NA	NA	NA	NA	NA	NA	OG0011073	12	2	YES	YES	YES	YES	YES	NA
HyS1474.1	0	1.86871	0.462	0.018	0	Epithelial Cells	3	enEp/ecEp	NA	NA	NA	NA	NA	NA	NA	OG0011073	12	2	YES	YES	YES	YES	YES	NA
HyS1560.1	0	2.23351	0.643	0.041	0	Epithelial Cells	3	enEp/ecEp	NA	NA	NA	NA	NA	XP_015780019.1 PREDICTED: uncharacterized protein LOC107357901 [Acropora digitifera]	6.8e-14	OG0007609	30	2	YES	YES	YES	YES	YES	NA
HyS1888.1	0	1.0678	0.289	0.008	0	Epithelial Cells	3	enEp/ecEp	NA	NA	NA	NA	NA	XP_012558915.1 PREDICTED: uncharacterized protein LOC100197130 [Hydra vulgaris]	4.4e-154	OG0004141	54	16	NA	NA	NA	NA	NA	NA
HyS2082.2	0	1.40827	0.371	0.015	0	Epithelial Cells	3	enEp/ecEp	NA	NA	NA	NA	NA	XP_004207050.1 PREDICTED: uncharacterized protein LOC101236484 [Hydra vulgaris]	6e-40	OG0003955	55	12	YES	NA	NA	NA	NA	NA
HyS2267.1	0	1.75285	0.47	0.006	0	Epithelial Cells	3	enEp/ecEp	Phosphatidylinositol 4-kinase	NA	kinase activity	phosphatidylinositol-mediated signaling	integral component of membrane	WP_111858388.1 N-acetyltransferase [Acinetobacter sp. CFCC 10889]	5e-05	OG0012378	9	4	NA	NA	NA	NA	NA	NA
HyS3157.1	1.56e-216	0.72048	0.252	0.014	3.44e-212	Epithelial Cells	3	enEp/ecEp	KN motif and ankyrin repeat domain-containing protein 1	KANK1	beta-catenin binding	negative regulation of actin filament polymerization	ruffle membrane	XP_012562942.1 PREDICTED: uncharacterized protein LOC100203056, partial [Hydra vulgaris]	1.1e-125	OG0002267	71	44	NA	NA	NA	NA	NA	NA
HyS3210.1	0	0.932149	0.322	0.003	0	Epithelial Cells	3	enEp/ecEp	NA	NA	NA	NA	NA	XP_002166703.1 PREDICTED: serine/threonine-protein phosphatase 6 regulatory ankyrin repeat subunit C-like [Hydra vulgaris]	1e-58	OG0000071	667	49	NA	NA	NA	NA	NA	NA
HyS3408.1	0	1.65102	0.487	0.029	0	Epithelial Cells	3	enEp/ecEp	Cell division control protein 42 homolog (Fragment)	NA	GTPase activity	small GTPase mediated signal transduction	cell cortex	KOX78779.1 Cdc42 like protein [Melipona quadrifasciata]	1.7e-20	Unassigned	NA	NA	NA	NA	NA	NA	NA	NA
HyS3612.1	0	1.32009	0.416	0.005	0	Epithelial Cells	3	enEp/ecEp	Transcription termination factor Rho domain-containing protein (Fragment)	NA	NA	NA	integral component of membrane	NA	NA	OG0012378	9	4	NA	NA	NA	NA	NA	NA
HyS4607.1	0	3.9009	0.647	0.012	0	Epithelial Cells	3	enEp/ecEp	Peptidyl-prolyl cis-trans isomerase A (Rotamase A)	NA	carbohydrate binding	melanin biosynthetic process	melanosome membrane	XP_028392856.1 uncharacterized protein LOC114517361 [Dendronephthya gigantea]	1.2e-68	OG0001326	102	27	NA	NA	NA	NA	NA	NA
HyS4649.1	0	2.43042	0.602	0.006	0	Epithelial Cells	3	enEp/ecEp	Innexin	NA	NA	ion transport	gap junction	NP_001274699.1 innexin inx1-like [Hydra vulgaris]	9e-98	OG0001165	112	6	NA	NA	NA	NA	NA	NA
HyS0002.538	0	1.3831	0.457	0.036	0	Spermatogenesis	4	sprm_1	NA	NA	NA	NA	NA	XP_012559021.1 PREDICTED: uncharacterized protein LOC101237693 [Hydra vulgaris]	1.2e-62	OG0009124	19	14	NA	NA	NA	NA	NA	NA
HyS0004.382	0	1.51785	0.466	0.033	0	Spermatogenesis	4	sprm_1	Tubulin tyrosine ligase like 4	TTLL4	ATP binding	protein polyglutamylation	NA	XP_028398321.1 tubulin polyglutamylase TTLL4-like isoform X1 [Dendronephthya gigantea]	2e-189	OG0000126	506	46	NA	NA	NA	NA	NA	NA
HyS0005.383	8.87e-255	0.988226	0.292	0.016	1.96e-250	Spermatogenesis	4	sprm_1	IQ motif and ankyrin repeat containing 1	NA	DNA-binding transcription factor activity	regulation of transcription, DNA-templated	NA	XP_022796237.1 putative IQ motif and ankyrin repeat domain-containing protein isoform X1 [Stylophora pistillata]	7.6e-47	OG0005523	46	26	NA	NA	NA	NA	NA	NA
HyS0006.137	4.01e-228	1.27744	0.358	0.032	8.83e-224	Spermatogenesis	4	sprm_1	NA	NA	NA	NA	NA	XP_022785185.1 coiled-coil domain-containing protein 33-like [Stylophora pistillata]	3.9e-33	OG0005099	48	34	NA	NA	NA	NA	NA	NA
HyS0007.70	1.18e-223	1.12421	0.324	0.026	2.6e-219	Spermatogenesis	4	sprm_1	NA	NA	NA	NA	NA	XP_012556383.1 PREDICTED: WD repeat-containing protein 93-like [Hydra vulgaris]	7.3e-65	OG0006233	41	32	NA	NA	NA	NA	NA	NA
HyS0008.348	0	2.13971	0.67	0.044	0	Spermatogenesis	4	sprm_1	NA	NA	NA	NA	NA	NA	NA	OG0012421	9	7	NA	NA	NA	NA	NA	NA
HyS0009.214	0	2.21237	0.672	0.044	0	Spermatogenesis	4	sprm_1	coiled-coil domain-containing protein 189	NA	NA	NA	NA	XP_009053819.1 hypothetical protein LOTGIDRAFT_214955 [Lottia gigantea]	3.2e-46	OG0005909	44	34	NA	NA	NA	NA	NA	NA
HyS0014.185	0	1.55066	0.509	0.032	0	Spermatogenesis	4	sprm_1	cilia- and flagella-associated protein 251	WDR66	DNA-binding transcription factor activity, RNA polymerase II-specific	flagellated sperm motility	motile cilium	XP_020893765.1 cilia- and flagella-associated protein 251-like [Exaiptasia pallida]	2.9e-280	OG0003877	55	39	NA	NA	NA	NA	NA	NA
HyS0016.47	0	1.92277	0.567	0.021	0	Spermatogenesis	4	sprm_1	Low quality protein: speedy protein c	SPDYC	protein kinase binding	positive regulation of cyclin-dependent protein serine/threonine kinase activity	nucleus	XP_028398839.1 speedy protein A-like [Dendronephthya gigantea]	6.2e-57	OG0003610	57	36	NA	NA	NA	NA	NA	NA
HyS0024.11	4.73e-207	1.25473	0.391	0.044	1.04e-202	Spermatogenesis	4	sprm_1	NA	NA	NA	NA	NA	NA	NA	Unassigned	NA	NA	NA	NA	NA	NA	NA	NA
HyS0024.64	2.97e-264	1.16299	0.292	0.015	6.55e-260	Spermatogenesis	4	sprm_1	NA	NA	NA	NA	NA	XP_028395080.1 uncharacterized protein LOC114519192 [Dendronephthya gigantea]	1.3e-95	OG0002967	62	30	NA	NA	NA	NA	NA	NA
HyS0028.151	7.94e-226	1.14147	0.376	0.035	1.75e-221	Spermatogenesis	4	sprm_1	NA	NA	NA	NA	NA	NA	NA	OG0007566	30	28	NA	NA	NA	NA	NA	NA
HyS0032.163	1.33e-304	1.21818	0.35	0.019	2.93e-300	Spermatogenesis	4	sprm_1	Cysteinyl-tRNA synthetase	CARS	cysteine-tRNA ligase activity	cysteinyl-tRNA aminoacylation	nucleus	NA	NA	OG0001405	98	49	NA	NA	NA	NA	NA	NA
HyS0032.56	1.1e-259	1.06306	0.303	0.017	2.43e-255	Spermatogenesis	4	sprm_1	RING-type domain-containing protein (Fragment)	NA	ubiquitin protein ligase activity	reciprocal meiotic recombination	synaptonemal complex	XP_012558556.1 PREDICTED: E3 ubiquitin-protein ligase CCNB1IP1-like, partial [Hydra vulgaris]	3.4e-54	OG0006846	36	31	NA	NA	NA	NA	NA	NA
HyS0033.87	4.79e-281	1.26309	0.365	0.024	1.06e-276	Spermatogenesis	4	sprm_1	Transcriptional activator Myb	MYB	DNA binding	regulation of transcription, DNA-templated	nucleus	XP_012561174.1 PREDICTED: transcriptional activator Myb-like [Hydra vulgaris]	1.3e-133	OG0001014	122	48	NA	NA	NA	NA	NA	NA
HyS0034.36	0	2.10519	0.637	0.018	0	Spermatogenesis	4	sprm_1	NA	NA	NA	NA	NA	NA	NA	OG0019666	4	3	YES	YES	YES	NA	NA	NA
HyS0039.39	0	1.21916	0.309	0.008	0	Spermatogenesis	4	sprm_1	NA	NA	NA	NA	NA	RMX53802.1 hypothetical protein pdam_00000306, partial [Pocillopora damicornis]	3.6e-15	OG0012895	8	7	YES	NA	NA	NA	NA	NA
HyS0040.205	6.37e-304	1.17813	0.35	0.019	1.4e-299	Spermatogenesis	4	sprm_1	NA	NA	NA	NA	NA	XP_015753724.1 PREDICTED: protein FAM227A-like [Acropora digitifera]	9e-53	OG0002210	72	31	NA	NA	NA	NA	NA	NA
HyS0040.6	4.1e-271	1.24719	0.345	0.022	9.03e-267	Spermatogenesis	4	sprm_1	NA	NA	NA	NA	NA	XP_015766420.1 PREDICTED: uncharacterized protein LOC107345226 [Acropora digitifera]	1.1e-30	OG0001454	96	11	NA	NA	NA	NA	NA	NA
HyS0041.151	2.67e-261	1.43895	0.44	0.043	5.89e-257	Spermatogenesis	4	sprm_1	SUN domain-containing protein 1	SUN2	lamin binding	nucleokinesis involved in cell motility in cerebral cortex radial glia guided migration	integral component of nuclear inner membrane	XP_012557830.1 PREDICTED: SUN domain-containing protein 3-like [Hydra vulgaris]	1.7e-87	OG0001973	78	43	NA	NA	NA	NA	NA	NA
HyS0042.104	0	1.96788	0.579	0.024	0	Spermatogenesis	4	sprm_1	CCHC-type domain-containing protein (Fragment)	NA	zinc ion binding	NA	NA	XP_015760217.1 PREDICTED: uncharacterized protein LOC107339444 [Acropora digitifera]	1.3e-11	OG0008410	23	19	NA	NA	NA	NA	NA	NA
HyS0046.78	2.7e-276	1.53303	0.47	0.048	5.95e-272	Spermatogenesis	4	sprm_1	Polyribonucleotide nucleotidyltransferase mitochondrial	KDELC2	polyribonucleotide nucleotidyltransferase activity	mRNA catabolic process	collagen trimer	XP_022790187.1 uncharacterized protein C11orf65 homolog [Stylophora pistillata]	2.3e-97	OG0006957	35	30	NA	NA	NA	NA	NA	NA
HyS0052.36	0	3.2914	0.865	0.046	0	Spermatogenesis	4	sprm_1	LOW QUALITY PROTEIN: HORMA domain-containing protein 2	HORMAD2	metal ion binding	meiotic sister chromatid cohesion	synaptonemal complex	XP_027045270.1 uncharacterized protein LOC113673111 [Pocillopora damicornis]	1.4e-133	OG0002704	65	44	NA	NA	NA	NA	NA	NA
HyS0054.29	0	1.62229	0.513	0.046	0	Spermatogenesis	4	sprm_1	Pleckstrin homology domain containing, family G (with RhoGef domain) member 4	PLEKHG4	Rho guanyl-nucleotide exchange factor activity	regulation of Rho protein signal transduction	integral component of membrane	XP_012555669.1 PREDICTED: puratrophin-1-like [Hydra vulgaris]	0	OG0000299	295	42	NA	NA	NA	NA	NA	NA
HyS0054.48	8.08e-239	1.31581	0.373	0.033	1.78e-234	Spermatogenesis	4	sprm_1	NA	NA	NA	NA	NA	XP_027060005.1 uncharacterized protein LOC113686568 [Pocillopora damicornis]	3.2e-12	OG0008274	24	21	NA	NA	NA	NA	NA	NA
HyS0059.18	0	1.32972	0.371	0.022	0	Spermatogenesis	4	sprm_1	Leucine rich repeats and guanylate kinase domain containing	LRGUK	kinase activity	axoneme assembly	manchette	XP_028414467.1 leucine-rich repeat and guanylate kinase domain-containing protein-like isoform X1 [Dendronephthya gigantea]	3.7e-65	OG0001611	89	48	NA	NA	NA	NA	NA	NA
HyS0062.131	9.1e-234	1.2615	0.397	0.039	2.01e-229	Spermatogenesis	4	sprm_1	Tubulin tyrosine ligase like 9	TTLL9	ATP binding	cellular protein modification process	NA	XP_012558074.1 PREDICTED: probable tubulin polyglutamylase TTLL9 [Hydra vulgaris]	2.9e-206	OG0000126	506	46	NA	NA	NA	NA	NA	NA
HyS0068.5	0	2.65039	0.706	0.044	0	Spermatogenesis	4	sprm_1	NA	NA	NA	NA	NA	XP_012556409.1 PREDICTED: uncharacterized protein LOC101240264 [Hydra vulgaris]	4.2e-11	OG0013874	7	4	YES	YES	YES	NA	NA	NA
HyS0071.24	0	1.58178	0.476	0.021	0	Spermatogenesis	4	sprm_1	RRM domain-containing protein (Fragment)	NA	mRNA binding	NA	NA	ALJ33583.1 boule-like 2a [Clytia hemisphaerica]	7.5e-53	OG0000063	748	49	NA	NA	NA	NA	NA	NA
HyS0089.35	0	1.46286	0.442	0.024	0	Spermatogenesis	4	sprm_1	Ankyrin repeat domain-containing protein 37	LRP2BP	protein binding	NA	cytoplasm	XP_002168803.3 PREDICTED: LRP2-binding protein-like, partial [Hydra vulgaris]	1.7e-84	OG0006061	42	34	NA	NA	NA	NA	NA	NA
HyS0098.50	9.93e-234	1.33995	0.427	0.047	2.19e-229	Spermatogenesis	4	sprm_1	NA	NA	NA	NA	NA	XP_012555138.1 PREDICTED: uncharacterized protein C9orf117 homolog [Hydra vulgaris]	4.2e-41	OG0006235	41	31	NA	NA	NA	NA	NA	NA
HyS0001.369	0	2.36784	0.525	0.013	0	Nematocytes	5	nem_1	Sushi, von Willebrand factor type A, EGF and pentraxin domain-containing protein 1	NA	calcium ion binding	Notch signaling pathway	extracellular region	XP_002168273.2 PREDICTED: fibropellin-1-like isoform X1 [Hydra vulgaris]	3.4e-121	OG0006425	40	30	NA	NA	NA	NA	NA	NA
HyS0001.95	0	1.65326	0.472	0.033	0	Nematocytes	5	nem_1	NA	NA	NA	NA	NA	XP_002170861.3 PREDICTED: uncharacterized protein LOC100215981 [Hydra vulgaris]	3.9e-20	OG0000582	177	13	NA	NA	NA	NA	NA	NA
HyS0003.314	2.98e-284	1.80694	0.439	0.033	6.57e-280	Nematocytes	5	nem_1	Dimethylarginine dimethylaminohydrolase	DDAH1	dimethylargininase activity	citrulline metabolic process	extracellular exosome	XP_002164291.1 PREDICTED: N(G),N(G)-dimethylarginine dimethylaminohydrolase 1-like [Hydra vulgaris]	4.4e-56	OG0002099	75	41	NA	NA	NA	NA	NA	NA
HyS0005.264	0	3.062	0.721	0.008	0	Nematocytes	5	nem_1	NA	NA	NA	NA	NA	NA	NA	OG0030797	2	2	YES	YES	YES	YES	YES	NA
HyS0005.437	0	3.37611	0.84	0.041	0	Nematocytes	5	nem_1	Cnidarian achaete-scute homolog	NA	protein dimerization activity	regulation of transcription by RNA polymerase II	RNA polymerase II transcription factor complex	AFV31436.1 Ash [Hydractinia echinata]	3.2e-78	OG0000046	946	42	NA	NA	NA	NA	NA	NA
HyS0006.242	0	2.1031	0.553	0.019	0	Nematocytes	5	nem_1	NA	NA	NA	NA	NA	NA	NA	OG0031587	2	2	YES	YES	YES	YES	YES	NA
HyS0007.24	2.13e-223	1.65151	0.444	0.047	4.7e-219	Nematocytes	5	nem_1	Tumor necrosis factor alpha-induced protein 8	NA	cysteine-type endopeptidase inhibitor activity involved in apoptotic process	regulation of apoptotic process	cytoplasm	XP_002165766.2 PREDICTED: tumor necrosis factor alpha-induced protein 8-like protein isoform X1 [Hydra vulgaris]	4.5e-66	OG0002523	67	46	NA	NA	NA	NA	NA	NA
HyS0007.289	0	3.10745	0.708	0.011	0	Nematocytes	5	nem_1	Laminin subunit gamma-1	NA	signaling receptor binding	regulation of embryonic development	basement membrane	XP_012554312.1 PREDICTED: laminin subunit alpha-1-like [Hydra vulgaris]	0	OG0000090	597	45	NA	NA	NA	NA	NA	NA
HyS0008.89	3.91e-263	1.5762	0.444	0.037	8.62e-259	Nematocytes	5	nem_1	NA	NA	NA	NA	NA	XP_012566785.1 PREDICTED: uncharacterized protein LOC100203660 [Hydra vulgaris]	1.5e-180	OG0012214	9	8	YES	YES	NA	NA	NA	NA
HyS0009.4	1.65e-208	1.38827	0.305	0.021	3.63e-204	Nematocytes	5	nem_1	NA	NA	NA	NA	NA	NA	NA	OG0031217	2	2	YES	YES	YES	YES	YES	NA
HyS0012.278	0	1.68187	0.317	0.003	0	Nematocytes	5	nem_1	NA	NA	NA	NA	NA	XP_012560426.1 PREDICTED: uncharacterized protein LOC105846337 [Hydra vulgaris]	0	OG0000929	128	39	NA	NA	NA	NA	NA	NA
HyS0013.203	4.96e-303	1.6998	0.353	0.018	1.09e-298	Nematocytes	5	nem_1	PR domain zinc finger protein 14	NA	methyltransferase activity	methylation	nucleus	XP_012559303.1 PREDICTED: putative histone-lysine N-methyltransferase PRDM6 [Hydra vulgaris]	2.4e-102	OG0000223	361	43	NA	NA	NA	NA	NA	NA
HyS0014.286	0	1.81036	0.49	0.032	0	Nematocytes	5	nem_1	NA	NA	NA	NA	NA	OZG00183.1 hypothetical protein FL82_06928, partial [Caenorhabditis remanei]	2.8e-06	OG0014471	6	4	NA	NA	NA	NA	NA	NA
HyS0018.202	7.16e-227	1.53688	0.322	0.021	1.58e-222	Nematocytes	5	nem_1	NA	NA	NA	NA	NA	RUS73677.1 hypothetical protein EGW08_018559, partial [Elysia chlorotica]	4.9e-05	OG0000640	166	45	NA	NA	NA	NA	NA	NA
HyS0020.156	0	2.27852	0.538	0.022	0	Nematocytes	5	nem_1	Tubulin alpha chain	NA	structural constituent of cytoskeleton	microtubule-based process	microtubule	ANN83870.1 alpha-tubulin [Patiria miniata]	1.9e-253	OG0000147	467	49	NA	NA	NA	NA	NA	NA
HyS0022.56	0	1.7329	0.411	0.025	0	Nematocytes	5	nem_1	NA	NA	NA	NA	NA	ORY21577.1 hypothetical protein BCR33DRAFT_861948 [Rhizoclosmatium globosum]	1.3e-13	OG0031318	2	2	YES	YES	YES	YES	YES	NA
HyS0022.61	0	2.63674	0.665	0.034	0	Nematocytes	5	nem_1	NA	NA	NA	NA	NA	NA	NA	OG0031320	2	2	YES	YES	YES	YES	YES	NA
HyS0023.127	1.12e-255	1.55128	0.365	0.024	2.47e-251	Nematocytes	5	nem_1	NA	NA	NA	NA	NA	XP_012560493.1 PREDICTED: uncharacterized protein LOC101239476 [Hydra vulgaris]	2.9e-167	OG0008033	26	20	NA	NA	NA	NA	NA	NA
HyS0024.200	1.74e-301	1.60259	0.487	0.038	3.82e-297	Nematocytes	5	nem_1	Whirlin	NA	actin filament binding	sensory perception of sound	NA	XP_006823043.1 PREDICTED: whirlin-like [Saccoglossus kowalevskii]	5.3e-76	OG0000800	140	38	NA	NA	NA	NA	NA	NA
HyS0030.198	0	2.30366	0.662	0.045	0	Nematocytes	5	nem_1	NA	NA	NA	NA	NA	NA	NA	OG0016453	5	3	YES	YES	YES	YES	NA	NA
HyS0032.220	0	3.24518	0.848	0.033	0	Nematocytes	5	nem_1	Laminin subunit gamma 1	NA	extracellular matrix structural constituent	extracellular matrix disassembly	basement membrane	XP_012562912.1 PREDICTED: laminin subunit gamma-1-like [Hydra vulgaris]	0	OG0000090	597	45	NA	NA	NA	NA	NA	NA
HyS0037.32	1.17e-292	1.22324	0.272	0.008	2.57e-288	Nematocytes	5	nem_1	Chondroitin sulfate N-acetylgalactosaminyltransferase 1	CSGALNACT1	acetylgalactosaminyltransferase activity	chondroitin sulfate proteoglycan biosynthetic process	Golgi cisterna membrane	XP_002165351.1 PREDICTED: chondroitin sulfate N-acetylgalactosaminyltransferase 1-like [Hydra vulgaris]	1.8e-183	OG0000446	218	41	NA	NA	NA	NA	NA	NA
HyS0046.31	0	2.23334	0.627	0.029	0	Nematocytes	5	nem_1	Laminin subunit alpha	NA	signaling receptor binding	regulation of embryonic development	basement membrane	PFX13764.1 Laminin subunit gamma-1 [Stylophora pistillata]	2e-228	OG0000090	597	45	NA	NA	NA	NA	NA	NA
HyS0049.11	0	3.0124	0.688	0.015	0	Nematocytes	5	nem_1	fork head transcription factor 1	NA	sequence-specific DNA binding	regulation of transcription, DNA-templated	nucleus	XP_002166457.2 PREDICTED: forkhead box protein N4-like [Hydra vulgaris]	9.7e-135	OG0000031	1109	49	NA	NA	NA	NA	NA	NA
HyS0052.44	0	2.38198	0.533	0.013	0	Nematocytes	5	nem_1	Glutathione gamma-glutamylcysteinyltransferase	NA	glutathione gamma-glutamylcysteinyltransferase activity	phytochelatin metabolic process	integral component of membrane	XP_002156317.3 PREDICTED: glutathione gamma-glutamylcysteinyltransferase 3-like [Hydra vulgaris]	6.1e-63	OG0002153	74	30	NA	NA	NA	NA	NA	NA
HyS0052.84	0	1.78064	0.464	0.034	0	Nematocytes	5	nem_1	NA	NA	NA	NA	NA	NA	NA	OG0016530	5	4	YES	YES	YES	NA	NA	NA
HyS0056.30	4.25e-298	1.38667	0.322	0.014	9.37e-294	Nematocytes	5	nem_1	Lysocardiolipin and lysophospholipid acyltransferase	NA	transferase activity, transferring acyl groups	phosphatidylinositol acyl-chain remodeling	endoplasmic reticulum	XP_002154493.2 PREDICTED: 1-acyl-sn-glycerol-3-phosphate acyltransferase epsilon-like [Hydra vulgaris]	2e-123	OG0000938	127	46	NA	NA	NA	NA	NA	NA
HyS0056.35	0	2.28078	0.538	0.047	0	Nematocytes	5	nem_1	Macrophage metalloelastase	NA	metalloendopeptidase activity	proteolysis	extracellular matrix	XP_012560295.1 PREDICTED: stromelysin-3-like [Hydra vulgaris]	1.3e-102	OG0000099	579	41	NA	NA	NA	NA	NA	NA
HyS0070.40	4.95e-230	1.26306	0.305	0.018	1.09e-225	Nematocytes	5	nem_1	NA	NA	NA	NA	NA	XP_002154885.1 PREDICTED: uncharacterized protein LOC100200582 [Hydra vulgaris]	3.4e-49	OG0005952	43	23	NA	NA	NA	NA	NA	NA
HyS0078.40	3.22e-258	1.40269	0.317	0.017	7.1e-254	Nematocytes	5	nem_1	Transient receptor potential cation channel subfamily A member basal	NA	ion channel activity	ion transmembrane transport	integral component of membrane	XP_012558786.1 PREDICTED: transient receptor potential cation channel subfamily A member 1 homolog [Hydra vulgaris]	1.9e-153	OG0000130	502	44	NA	NA	NA	NA	NA	NA
HyS0098.36	0	2.757	0.698	0.038	0	Nematocytes	5	nem_1	Transgelin	NA	calmodulin binding	actomyosin structure organization	NA	XP_002162291.1 PREDICTED: myophilin-like [Hydra vulgaris]	5.2e-75	OG0000338	272	49	NA	NA	NA	NA	NA	NA
HyS0130.19	0	2.51743	0.66	0.018	0	Nematocytes	5	nem_1	B( +)-type amino acid transporter	SLC7A9	transmembrane transporter activity	transmembrane transport	integral component of membrane	XP_002153934.1 PREDICTED: b(0,+)-type amino acid transporter 1-like [Hydra vulgaris]	1.2e-222	OG0000141	473	48	NA	NA	NA	NA	NA	NA
HyS0137.15	0	1.98325	0.546	0.028	0	Nematocytes	5	nem_1	NA	NA	NA	NA	NA	XP_012564874.1 PREDICTED: uncharacterized protein LOC101237488 isoform X1 [Hydra vulgaris]	1.3e-67	OG0000751	148	16	NA	NA	NA	NA	NA	NA
HyS0153.11	0	1.48221	0.373	0.013	0	Nematocytes	5	nem_1	Tubulin alpha chain	NA	structural constituent of cytoskeleton	microtubule-based process	microtubule	ANN83870.1 alpha-tubulin [Patiria miniata]	1.9e-253	OG0000147	467	49	NA	NA	NA	NA	NA	NA
HyS0001.104	3.55e-219	0.57369	0.342	0.023	7.82e-215	I-Cells	6	ISC/prog	NA	NA	NA	NA	NA	XP_004626507.1 DNA-directed RNA polymerase I subunit RPA43 [Octodon degus]	3.3e-25	OG0005965	43	42	NA	NA	NA	NA	NA	NA
HyS0001.628	4.02e-247	0.561734	0.425	0.033	8.85e-243	I-Cells	6	ISC/prog	Epithelial splicing regulatory protein 1	EI24	oligosaccharyl transferase activity	macroautophagy	integral component of membrane	XP_012556106.1 PREDICTED: etoposide-induced protein 2.4 homolog [Hydra vulgaris]	1.5e-111	OG0005024	49	44	NA	NA	NA	NA	NA	NA
HyS0001.736	1.02e-254	0.715146	0.486	0.043	2.25e-250	I-Cells	6	ISC/prog	Ribosomal RNA processing protein 1 like protein B	RRP1	transcription coactivator activity	rRNA processing	preribosome, small subunit precursor	XP_012556249.1 PREDICTED: uncharacterized protein LOC100206113 [Hydra vulgaris]	1e-70	OG0003833	55	49	NA	NA	NA	NA	NA	NA
HyS0002.129	1e-288	0.76584	0.506	0.04	2.2e-284	I-Cells	6	ISC/prog	CCR4-NOT transcription complex subunit	CNOT10	NA	regulation of translation	CCR4-NOT complex	XP_002159751.3 PREDICTED: CCR4-NOT transcription complex subunit 10-like [Hydra vulgaris]	6.2e-228	OG0003679	56	45	NA	NA	NA	NA	NA	NA
HyS0002.273	0	1.16755	0.644	0.025	0	I-Cells	6	ISC/prog	NA	NA	NA	NA	NA	NA	NA	OG0023495	3	2	YES	YES	YES	YES	YES	NA
HyS0002.583	2.7e-248	0.497711	0.344	0.02	5.94e-244	I-Cells	6	ISC/prog	Ribosome biogenesis protein bop1-B	BOP1	ribonucleoprotein complex binding	maturation of LSU-rRNA from tricistronic rRNA transcript (SSU-rRNA, 5.8S rRNA, LSU-rRNA)	preribosome, large subunit precursor	XP_012560683.1 PREDICTED: ribosome biogenesis protein bop1-B-like [Hydra vulgaris]	4.5e-292	OG0003828	55	49	NA	NA	NA	NA	NA	NA
HyS0002.80	5.22e-276	0.856272	0.536	0.048	1.15e-271	I-Cells	6	ISC/prog	Negative elongation factor D	NELFCD	translation elongation factor activity	negative regulation of transcription, DNA-templated	nucleus	XP_027046240.1 negative elongation factor C/D-like [Pocillopora damicornis]	4.6e-167	OG0004331	53	44	NA	NA	NA	NA	NA	NA
HyS0003.143	1.04e-211	0.717837	0.425	0.04	2.28e-207	I-Cells	6	ISC/prog	Chromatin target of PRMT1	NA	NA	NA	NA	XP_002156847.1 PREDICTED: chromatin target of PRMT1 protein-like [Hydra vulgaris]	6.7e-07	OG0007769	28	25	NA	NA	NA	NA	NA	NA
HyS0003.247	2.35e-267	0.65253	0.386	0.024	5.17e-263	I-Cells	6	ISC/prog	NA	NA	NA	NA	NA	XP_012554798.1 PREDICTED: uncharacterized protein LOC100201493 [Hydra vulgaris]	3.5e-13	OG0008187	25	25	NA	NA	NA	NA	NA	NA
HyS0003.248	3.16e-214	0.725865	0.456	0.046	6.96e-210	I-Cells	6	ISC/prog	AP complex subunit sigma	AP4S1	serine-type carboxypeptidase activity	intracellular protein transport	membrane coat	XP_003384751.1 PREDICTED: AP-4 complex subunit sigma-1-like isoform X1 [Amphimedon queenslandica]	4.1e-48	OG0000681	159	49	NA	NA	NA	NA	NA	NA
HyS0003.327	0	0.694818	0.422	0.021	0	I-Cells	6	ISC/prog	Acetate kinase	ACKA	acetate kinase activity	acetyl-CoA biosynthetic process	cytoplasm	RLA94875.1 acetate kinase [Deltaproteobacteria bacterium]	1.5e-92	OG0010023	15	12	NA	NA	NA	NA	NA	NA
HyS0003.468	4.97e-250	1.15898	0.506	0.049	1.09e-245	I-Cells	6	ISC/prog	NA	NA	NA	NA	NA	XP_012560324.1 PREDICTED: uncharacterized protein LOC105846292 [Hydra vulgaris]	7.3e-13	OG0010018	15	8	YES	YES	NA	NA	NA	NA
HyS0003.479	3.31e-271	0.656677	0.417	0.028	7.3e-267	I-Cells	6	ISC/prog	TatD DNase domain containing 3	TATDN3	hydrolase activity, acting on ester bonds	DNA metabolic process	NA	XP_012555676.1 PREDICTED: putative deoxyribonuclease TATDN3 [Hydra vulgaris]	1.3e-64	OG0004867	50	39	NA	NA	NA	NA	NA	NA
HyS0004.479	1.96e-245	0.675478	0.469	0.041	4.31e-241	I-Cells	6	ISC/prog	SOSS complex subunit C	INIP	NA	DNA repair	SOSS complex	XP_008921518.1 SOSS complex subunit C isoform X1 [Manacus vitellinus]	9.5e-07	OG0007668	29	28	NA	NA	NA	NA	NA	NA
HyS0004.63	4.59e-222	0.635146	0.436	0.04	1.01e-217	I-Cells	6	ISC/prog	CDK5 regulatory subunit-associated protein 3	CDK5RAP3	MDM2/MDM4 family protein binding	negative regulation of protein kinase activity by regulation of protein phosphorylation	centrosome	XP_004207683.1 PREDICTED: CDK5 regulatory subunit-associated protein 3-like [Hydra vulgaris]	2.4e-159	OG0004428	52	43	NA	NA	NA	NA	NA	NA
HyS0005.171	2.01e-217	0.586729	0.392	0.032	4.43e-213	I-Cells	6	ISC/prog	Nucleoside diphosphate-linked moiety X motif 6	NUDT6	ADP-ribose diphosphatase activity	NA	integral component of membrane	XP_012558846.1 PREDICTED: nucleoside diphosphate-linked moiety X motif 6-like isoform X1 [Hydra vulgaris]	3.4e-81	OG0004034	54	35	NA	NA	NA	NA	NA	NA
HyS0005.267	2.47e-275	0.607096	0.314	0.013	5.43e-271	I-Cells	6	ISC/prog	Hexosyltransferase	NA	galactosyltransferase activity	protein glycosylation	Golgi membrane	XP_004205819.1 PREDICTED: UDP-GalNAc:beta-1,3-N-acetylgalactosaminyltransferase 1-like [Hydra vulgaris]	4.8e-126	OG0000050	911	45	NA	NA	NA	NA	NA	NA
HyS0005.360	0	0.692906	0.436	0.023	0	I-Cells	6	ISC/prog	Hemocyte protein-glutamine gamma-glutamyltransferase	TGM6	protein-glutamine gamma-glutamyltransferase activity	peptide cross-linking	collagen-containing extracellular matrix	XP_002590206.1 hypothetical protein BRAFLDRAFT_128282 [Branchiostoma floridae]	1.3e-120	OG0000500	199	39	NA	NA	NA	NA	NA	NA
HyS0006.245	2.31e-225	0.723009	0.453	0.042	5.08e-221	I-Cells	6	ISC/prog	Fatty acid synthase	DUS1L	tRNA dihydrouridine synthase activity	tRNA dihydrouridine synthesis	ribosome	XP_021350646.1 tRNA-dihydrouridine(16/17) synthase [NAD(P)(+)]-like [Mizuhopecten yessoensis]	9.2e-127	OG0003094	61	48	NA	NA	NA	NA	NA	NA
HyS0006.346	5.61e-228	0.501951	0.319	0.019	1.24e-223	I-Cells	6	ISC/prog	NA	NA	NA	NA	NA	XP_018295426.1 hypothetical protein PHYBLDRAFT_60519 [Phycomyces blakesleeanus NRRL 1555(-)]	1.3e-07	OG0009107	19	15	NA	NA	NA	NA	NA	NA
HyS0008.32	3.14e-287	0.778962	0.456	0.032	6.91e-283	I-Cells	6	ISC/prog	Blast:Juxtaposed with another zinc finger protein 1	NA	NA	regulation of filopodium assembly	filopodium tip	XP_004580979.1 PREDICTED: protein Simiate [Ochotona princeps]	2e-25	OG0005961	43	42	NA	NA	NA	NA	NA	NA
HyS0008.352	9.52e-267	0.655109	0.461	0.036	2.1e-262	I-Cells	6	ISC/prog	SAGA-associated factor 11	ATXN7L3	transcription coactivator activity	histone deubiquitination	DUBm complex	XP_012556379.1 PREDICTED: ataxin-7-like protein 3 [Hydra vulgaris]	2.9e-116	OG0004619	51	45	NA	NA	NA	NA	NA	NA
HyS0008.78	1.01e-220	0.511837	0.344	0.023	2.23e-216	I-Cells	6	ISC/prog	Bromodomain adjacent to zinc finger domain protein 1A	NA	fatty-acyl-CoA binding	actin filament depolymerization	actin cytoskeleton	XP_002158994.2 PREDICTED: uncharacterized protein LOC100211334 [Hydra vulgaris]	4.9e-83	OG0007437	31	27	NA	NA	NA	NA	NA	NA
HyS0008.79	4.87e-221	0.533535	0.344	0.023	1.07e-216	I-Cells	6	ISC/prog	NA	NA	NA	NA	NA	XP_004209441.1 PREDICTED: uncharacterized protein C19orf52-like [Hydra vulgaris]	2.5e-53	OG0005862	44	41	NA	NA	NA	NA	NA	NA
HyS0009.287	2.5e-216	0.595497	0.403	0.034	5.5e-212	I-Cells	6	ISC/prog	Pre-mRNA-processing factor 19	PRPF19	ubiquitin protein ligase activity	protein ubiquitination	Prp19 complex	XP_012566859.1 PREDICTED: pre-mRNA-processing factor 19-like [Hydra vulgaris]	3.6e-192	OG0001842	81	48	NA	NA	NA	NA	NA	NA
HyS0009.294	8.83e-239	0.63647	0.456	0.04	1.94e-234	I-Cells	6	ISC/prog	Pre-mRNA-processing factor 19	PRPF19	ubiquitin protein ligase activity	protein ubiquitination	Prp19 complex	XP_012566859.1 PREDICTED: pre-mRNA-processing factor 19-like [Hydra vulgaris]	3.6e-192	OG0001842	81	48	NA	NA	NA	NA	NA	NA
HyS0009.99	3.66e-239	0.603519	0.414	0.032	8.06e-235	I-Cells	6	ISC/prog	NA	NA	NA	NA	NA	XP_002158539.1 PREDICTED: beta-1,3-galactosyltransferase sqv-2-like [Hydra vulgaris]	5.4e-80	OG0000751	148	16	NA	NA	NA	NA	NA	NA
HyS0010.104	2.58e-297	0.675538	0.472	0.033	5.69e-293	I-Cells	6	ISC/prog	2-(3-amino-3-carboxypropyl)histidine synthase subunit 2	DPH2	transferase activity	peptidyl-diphthamide metabolic process	cytoplasm	XP_012556491.1 PREDICTED: diphthamide biosynthesis protein 2-like [Hydra vulgaris]	5e-119	OG0004380	52	49	NA	NA	NA	NA	NA	NA
HyS0010.124	1.54e-210	0.553759	0.372	0.029	3.39e-206	I-Cells	6	ISC/prog	NA	NA	NA	NA	NA	XP_002159683.2 PREDICTED: uncharacterized protein LOC100210454 [Hydra vulgaris]	2.5e-73	OG0007757	28	27	NA	NA	NA	NA	NA	NA
HyS0010.252	1.3e-271	0.834182	0.528	0.047	2.86e-267	I-Cells	6	ISC/prog	Opa-interacting protein 2	EXOSC8	transcription coregulator activity	RNA catabolic process	exosome (RNase complex)	XP_004209723.2 PREDICTED: transcription factor SPT20 homolog [Hydra vulgaris]	3.1e-215	OG0004878	50	41	NA	NA	NA	NA	NA	NA
HyS0010.380	8.9e-269	0.5359	0.367	0.021	1.96e-264	I-Cells	6	ISC/prog	Periodic tryptophan protein 1	PWP1	H4K20me3 modified histone binding	negative regulation of peptidyl-serine phosphorylation of STAT protein	nucleus	XP_002157986.1 PREDICTED: periodic tryptophan protein 1 homolog [Hydra vulgaris]	2.4e-146	OG0003338	59	46	NA	NA	NA	NA	NA	NA
HyS0011.138	0	1.13493	0.661	0.047	0	I-Cells	6	ISC/prog	sorbitol dehydrogenase	SORD	zinc ion binding	fructose biosynthetic process	extracellular exosome	XP_004207543.1 PREDICTED: sorbitol dehydrogenase-like [Hydra vulgaris]	1.1e-155	OG0000392	236	46	NA	NA	NA	NA	NA	NA
HyS0011.179	9.89e-228	0.494192	0.336	0.021	2.18e-223	I-Cells	6	ISC/prog	Blast:Female-specific protein transformer	NA	promoter-specific chromatin binding	negative regulation of transcription, DNA-templated	PRC1 complex	XP_012555081.1 PREDICTED: polycomb group RING finger protein 1-like [Hydra vulgaris]	1.7e-54	OG0000476	207	44	NA	NA	NA	NA	NA	NA
HyS0011.192	0	1.00693	0.611	0.045	0	I-Cells	6	ISC/prog	Stomatin protein 2, mitochondrial	NA	thymidylate kinase activity	cell division	membrane	XP_002167831.2 PREDICTED: stomatin-like protein 2, mitochondrial [Hydra vulgaris]	6.3e-101	OG0003346	59	48	NA	NA	NA	NA	NA	NA
HyS0011.290	0	0.918826	0.575	0.044	0	I-Cells	6	ISC/prog	NA	NA	NA	NA	NA	XP_012556400.1 PREDICTED: proteasome assembly chaperone 1-like [Hydra vulgaris]	1.3e-47	OG0006505	39	36	NA	NA	NA	NA	NA	NA
HyS0011.294	8.51e-233	0.682804	0.475	0.045	1.88e-228	I-Cells	6	ISC/prog	DNA-directed RNA polymerase subunit	POLR1A	DNA-directed 5'-3' RNA polymerase activity	transcription, DNA-templated	nucleus	XP_012565753.1 PREDICTED: DNA-directed RNA polymerase I subunit RPA1 [Hydra vulgaris]	0	OG0002969	62	49	NA	NA	NA	NA	NA	NA
HyS0016.126	9.61e-268	0.582734	0.4	0.026	2.12e-263	I-Cells	6	ISC/prog	Phosphatidylinositol glycan anchor biosynthesis, class F	NA	NA	GPI anchor biosynthetic process	endoplasmic reticulum membrane	XP_004205968.2 PREDICTED: phosphatidylinositol-glycan biosynthesis class F protein-like [Hydra vulgaris]	7.9e-32	OG0006427	40	37	NA	NA	NA	NA	NA	NA
HyS0016.17	6.27e-207	0.596375	0.411	0.038	1.38e-202	I-Cells	6	ISC/prog	Pseudouridine synthase 10	PUS10	pseudouridine synthase activity	pseudouridine synthesis	integral component of membrane	XP_012561299.1 PREDICTED: putative tRNA pseudouridine synthase Pus10 [Hydra vulgaris]	6.9e-113	OG0005169	48	42	NA	NA	NA	NA	NA	NA
HyS0016.199	3.21e-299	0.591203	0.397	0.021	7.08e-295	I-Cells	6	ISC/prog	Phosphatase and actin regulator	NA	sulfate binding	protein heterotetramerization	nuclear membrane	XP_002157481.1 PREDICTED: regulator of chromosome condensation-like [Hydra vulgaris]	5.8e-178	OG0003707	56	49	NA	NA	NA	NA	NA	NA
HyS0016.201	7.49e-272	0.516369	0.333	0.016	1.65e-267	I-Cells	6	ISC/prog	Pre-mRNA processing factor 31	PRPF31	U4atac snRNA binding	spliceosomal tri-snRNP complex assembly	U4/U6 x U5 tri-snRNP complex	XP_002156371.2 PREDICTED: U4/U6 small nuclear ribonucleoprotein Prp31-like [Hydra vulgaris]	5.4e-225	OG0003522	57	47	NA	NA	NA	NA	NA	NA
HyS0016.205	3.06e-246	0.71221	0.467	0.04	6.74e-242	I-Cells	6	ISC/prog	NA	NA	NA	NA	NA	PFX13460.1 hypothetical protein AWC38_SpisGene22453 [Stylophora pistillata]	3.8e-07	OG0005059	49	14	YES	NA	NA	NA	NA	NA
HyS0016.257	1.88e-299	0.59053	0.442	0.028	4.15e-295	I-Cells	6	ISC/prog	Anaphase-promoting complex subunit 7	GPN3	GTP binding	Arp2/3 complex-mediated actin nucleation	protein-containing complex	XP_012560172.1 PREDICTED: GPN-loop GTPase 3-like [Hydra vulgaris]	3.8e-119	OG0001174	111	49	NA	NA	NA	NA	NA	NA
HyS0016.282	0	0.859008	0.533	0.033	0	I-Cells	6	ISC/prog	Mediator of RNA polymerase II transcription subunit 7	NA	transcription coregulator activity	regulation of transcription by RNA polymerase II	mediator complex	XP_012564217.1 PREDICTED: mediator of RNA polymerase II transcription subunit 7-like [Hydra vulgaris]	8.1e-72	OG0003410	58	47	NA	NA	NA	NA	NA	NA
HyS0016.48	1.34e-227	0.84447	0.458	0.043	2.96e-223	I-Cells	6	ISC/prog	Pre-mRNA-processing factor 39	NA	pre-mRNA 5'-splice site binding	RNA processing	nucleus	XP_012556055.1 PREDICTED: pre-mRNA-processing factor 39-like [Hydra vulgaris]	5.4e-191	OG0005219	48	42	NA	NA	NA	NA	NA	NA
HyS0017.92	0	0.901077	0.556	0.037	0	I-Cells	6	ISC/prog	NA	NA	NA	NA	NA	XP_012564361.1 PREDICTED: all-trans retinoic acid-induced differentiation factor-like [Hydra vulgaris]	1.3e-24	OG0008475	23	21	NA	NA	NA	NA	NA	NA
HyS0018.102	7.83e-228	0.658801	0.453	0.041	1.72e-223	I-Cells	6	ISC/prog	NA	NA	NA	NA	NA	XP_012554167.1 PREDICTED: pre-rRNA-processing protein TSR2 homolog [Hydra vulgaris]	1.8e-34	OG0006430	40	37	NA	NA	NA	NA	NA	NA
HyS0018.111	4e-229	0.534126	0.408	0.032	8.82e-225	I-Cells	6	ISC/prog	Muskelin 1, intracellular mediator containing kelch motifs	MKLN1	identical protein binding	cell-matrix adhesion	ruffle	XP_012567064.1 PREDICTED: muskelin-like [Hydra vulgaris]	4e-269	OG0003700	56	42	NA	NA	NA	NA	NA	NA
HyS0018.112	4.61e-292	0.609431	0.35	0.016	1.02e-287	I-Cells	6	ISC/prog	Coiled-coil domain-containing protein 134	NA	NA	NA	integral component of membrane	XP_004206188.1 PREDICTED: coiled-coil domain-containing protein 134-like [Hydra vulgaris]	1.9e-60	OG0004800	50	42	NA	NA	NA	NA	NA	NA
HyS0018.309	3.29e-239	0.602239	0.397	0.03	7.25e-235	I-Cells	6	ISC/prog	Periodic tryptophan protein 2	NA	NA	septum digestion after cytokinesis	Pwp2p-containing subcomplex of 90S preribosome	XP_002157810.2 PREDICTED: periodic tryptophan protein 2 homolog [Hydra vulgaris]	0	OG0002805	64	49	NA	NA	NA	NA	NA	NA
HyS0019.129	0	0.947122	0.586	0.045	0	I-Cells	6	ISC/prog	39S ribosomal protein L44,mitochondrial	NA	ribonuclease III activity	RNA phosphodiester bond hydrolysis, endonucleolytic	ribosome	XP_012554082.1 PREDICTED: 39S ribosomal protein L44, mitochondrial-like [Hydra vulgaris]	1e-79	OG0004995	49	41	NA	NA	NA	NA	NA	NA
HyS0020.112	9.78e-250	0.76424	0.506	0.048	2.15e-245	I-Cells	6	ISC/prog	Mitochondrial nucleoid factor 1 (Fragment)	NA	NA	respiratory chain complex III assembly	mitochondrion	XP_002160532.2 PREDICTED: ubiquinol-cytochrome-c reductase complex assembly factor 2-like [Hydra vulgaris]	4.8e-23	OG0007429	31	29	NA	NA	NA	NA	NA	NA
HyS0021.201	1.14e-237	0.726632	0.475	0.044	2.52e-233	I-Cells	6	ISC/prog	Signal recognition particle protein (Fragment)	SRP9	7S RNA binding	negative regulation of translational elongation	signal recognition particle, endoplasmic reticulum targeting	XP_012562235.1 PREDICTED: signal recognition particle 9 kDa protein-like [Hydra vulgaris]	1.8e-26	OG0007060	34	34	NA	NA	NA	NA	NA	NA
HyS0022.75	2.97e-266	0.786834	0.464	0.037	6.54e-262	I-Cells	6	ISC/prog	Nuclear fragile X mental retardation-interacting protein 1	NA	RNA binding	box C/D snoRNP assembly	perichromatin fibrils	XP_002159766.2 PREDICTED: nuclear fragile X mental retardation-interacting protein 1-like [Hydra vulgaris]	5.1e-44	OG0005222	48	43	NA	NA	NA	NA	NA	NA
HyS0023.208	1.59e-226	0.711688	0.433	0.038	3.5e-222	I-Cells	6	ISC/prog	U6 small nuclear RNA (adenine-(43)-N(6))-methyltransferase	METTL16	methyltransferase activity	methylation	nucleus	XP_012558687.1 PREDICTED: methyltransferase-like protein 16 [Hydra vulgaris]	2.5e-111	OG0004321	53	45	NA	NA	NA	NA	NA	NA
HyS0023.24	4.3e-265	0.880189	0.522	0.049	9.47e-261	I-Cells	6	ISC/prog	Myc box-dependent-interacting protein 1	GCN1	protein kinase regulator activity	positive regulation of kinase activity	polysome	XP_012560686.1 PREDICTED: translational activator GCN1, partial [Hydra vulgaris]	0	OG0001933	79	48	NA	NA	NA	NA	NA	NA
HyS0023.332	3.42e-254	0.724731	0.439	0.034	7.53e-250	I-Cells	6	ISC/prog	THUMP domain-containing protein 1 (Fragment)	NA	RNA binding	tRNA modification	NA	XP_002168018.1 PREDICTED: THUMP domain-containing protein 1-like [Hydra vulgaris]	9.1e-73	OG0005200	48	45	NA	NA	NA	NA	NA	NA
HyS0024.226	1.93e-244	0.67316	0.45	0.038	4.25e-240	I-Cells	6	ISC/prog	Phosphatidyl inositol N-acetylglucosaminyl transferase subunit C	PIGC	phosphatidylinositol N-acetylglucosaminyltransferase activity	GPI anchor biosynthetic process	glycosylphosphatidylinositol-N-acetylglucosaminyltransferase (GPI-GnT) complex	XP_002167015.2 PREDICTED: transmembrane protein 161B-like [Hydra vulgaris]	5.5e-130	OG0005609	45	38	NA	NA	NA	NA	NA	NA
HyS0024.238	6.1e-260	0.759069	0.467	0.038	1.34e-255	I-Cells	6	ISC/prog	Mitochondrial inner membrane protease subunit	IMMP1L	serine-type peptidase activity	protein processing involved in protein targeting to mitochondrion	mitochondrion	XP_020913342.1 mitochondrial inner membrane protease subunit 1-like isoform X1 [Exaiptasia pallida]	4.9e-42	OG0001361	100	49	NA	NA	NA	NA	NA	NA
HyS0025.231	0	1.36994	0.603	0.01	0	I-Cells	6	ISC/prog	Betaine homocysteine S-methyltransferase	NA	betaine-homocysteine S-methyltransferase activity	methionine biosynthetic process	cytoplasm	XP_022807107.1 betaine--homocysteine S-methyltransferase 1-like isoform X1 [Stylophora pistillata]	3.3e-107	OG0000612	171	35	NA	NA	NA	NA	NA	NA
HyS0025.79	4.67e-213	0.389764	0.314	0.02	1.03e-208	I-Cells	6	ISC/prog	Serine/threonine-protein kinase RIO1	RIOK1	protein serine/threonine kinase activity	protein phosphorylation	preribosome, small subunit precursor	XP_012564707.1 PREDICTED: serine/threonine-protein kinase RIO1-like [Hydra vulgaris]	1.4e-159	OG0001554	91	49	NA	NA	NA	NA	NA	NA
HyS0026.141	0	0.79562	0.528	0.038	0	I-Cells	6	ISC/prog	NA	NA	NA	NA	NA	NA	NA	OG0011192	11	11	YES	NA	NA	NA	NA	NA
HyS0026.175	7.14e-224	0.533613	0.328	0.02	1.57e-219	I-Cells	6	ISC/prog	DNA polymerase	NA	DNA-directed DNA polymerase activity	DNA biosynthetic process	nucleus	XP_012560820.1 PREDICTED: DNA polymerase delta catalytic subunit-like [Hydra vulgaris]	0	OG0003661	56	48	NA	NA	NA	NA	NA	NA
HyS0026.32	7.75e-259	0.697194	0.472	0.039	1.71e-254	I-Cells	6	ISC/prog	PUM-HD domain-containing protein (Fragment)	NA	RNA binding	NA	nucleolus	XP_002156370.2 PREDICTED: pumilio domain-containing protein KIAA0020-like [Hydra vulgaris]	6.3e-127	OG0004530	52	48	NA	NA	NA	NA	NA	NA
HyS0026.88	1.86e-236	0.544152	0.369	0.025	4.09e-232	I-Cells	6	ISC/prog	Adenine DNA glycosylase	MUTYH	4 iron, 4 sulfur cluster binding	base-excision repair	nucleus	XP_019632406.1 PREDICTED: adenine DNA glycosylase-like [Branchiostoma belcheri]	1.2e-114	OG0006272	41	35	NA	NA	NA	NA	NA	NA
HyS0027.189	2.22e-243	0.565642	0.45	0.038	4.9e-239	I-Cells	6	ISC/prog	Transcription initiation factor TFIID subunit	TAF11	protein heterodimerization activity	transcription initiation from RNA polymerase II promoter	nucleus	XP_002161376.2 PREDICTED: transcription initiation factor TFIID subunit 11-like [Hydra vulgaris]	1.1e-49	OG0005131	48	44	NA	NA	NA	NA	NA	NA
HyS0027.26	6.66e-252	0.710449	0.489	0.044	1.47e-247	I-Cells	6	ISC/prog	Sidoreflexin	SFXN2	ion transmembrane transporter activity	ion transmembrane transport	mitochondrial membrane	XP_002162432.1 PREDICTED: sideroflexin-2-like [Hydra vulgaris]	1e-139	OG0000654	163	49	NA	NA	NA	NA	NA	NA
HyS0028.164	9.66e-254	0.730337	0.492	0.044	2.13e-249	I-Cells	6	ISC/prog	Nucleolar complex protein 2	NOC2L	repressing transcription factor binding	negative regulation of histone acetylation	Noc2p-Noc3p complex	XP_012554803.1 PREDICTED: nucleolar complex protein 2 homolog [Hydra vulgaris]	7.5e-172	OG0003654	56	49	NA	NA	NA	NA	NA	NA
HyS0028.231	1.78e-249	0.620086	0.456	0.038	3.92e-245	I-Cells	6	ISC/prog	Signal recognition particle	SRP14	endoplasmic reticulum signal peptide binding	SRP-dependent cotranslational protein targeting to membrane	signal recognition particle, endoplasmic reticulum targeting	XP_012563430.1 PREDICTED: signal recognition particle 14 kDa protein-like [Hydra vulgaris]	1.3e-33	OG0005673	45	42	NA	NA	NA	NA	NA	NA
HyS0029.12	1.06e-266	0.50254	0.328	0.016	2.34e-262	I-Cells	6	ISC/prog	rRNA 2'-O-methyltransferase fibrillarin	NA	methyltransferase activity	rRNA processing	nucleolus	XP_002168049.2 PREDICTED: rRNA 2'-O-methyltransferase fibrillarin-like isoform X1 [Hydra vulgaris]	2.9e-125	OG0004639	51	45	NA	NA	NA	NA	NA	NA
HyS0029.208	0	0.877242	0.492	0.017	0	I-Cells	6	ISC/prog	NA	NA	NA	NA	NA	XP_002157324.3 PREDICTED: thioredoxin domain-containing protein 16-like [Hydra vulgaris]	9e-123	OG0014081	7	3	YES	YES	YES	NA	NA	NA
HyS0029.27	0	0.793966	0.514	0.037	0	I-Cells	6	ISC/prog	ADP-ribosylation factor	NA	GTP binding	vesicle-mediated transport	plasma membrane	XP_024506179.1 ADP-ribosylation factor 1 [Strongyloides ratti]	3.2e-69	OG0000075	639	49	NA	NA	NA	NA	NA	NA
HyS0030.127	1.43e-219	0.598696	0.397	0.032	3.16e-215	I-Cells	6	ISC/prog	Kelch domain-containing protein 10	NA	NA	NA	NA	XP_020612330.1 kelch domain-containing protein 10-like [Orbicella faveolata]	4.2e-63	OG0002708	65	40	NA	NA	NA	NA	NA	NA
HyS0030.33	0	0.898369	0.575	0.045	0	I-Cells	6	ISC/prog	Component of gems 1	NA	RNA binding	mRNA processing	nucleus	XP_002160279.2 PREDICTED: survival motor neuron protein-like [Hydra vulgaris]	6.2e-31	OG0001532	92	48	NA	NA	NA	NA	NA	NA
HyS0030.90	2.38e-220	0.655379	0.475	0.048	5.25e-216	I-Cells	6	ISC/prog	Embryo sac development arrest 13	UTP15	snoRNA binding	rRNA processing	nucleolus	XP_002167466.1 PREDICTED: U3 small nucleolar RNA-associated protein 15 homolog [Hydra vulgaris]	1.6e-193	OG0004637	51	46	NA	NA	NA	NA	NA	NA
HyS0031.15	2.37e-211	0.448575	0.306	0.018	5.22e-207	I-Cells	6	ISC/prog	Methylcrotonoyl-carboxylase subunit mitochondrial	MCCC1	ligase activity	leucine catabolic process	methylcrotonoyl-CoA carboxylase complex	XP_004210223.2 PREDICTED: methylcrotonoyl-CoA carboxylase subunit alpha, mitochondrial-like [Hydra vulgaris]	4e-237	OG0001142	113	48	NA	NA	NA	NA	NA	NA
HyS0031.97	3.06e-249	0.741122	0.472	0.042	6.73e-245	I-Cells	6	ISC/prog	Epididymis secretory sperm binding protein Li 8a	NIT2	omega-amidase activity	oxaloacetate metabolic process	centrosome	XP_002158547.1 PREDICTED: omega-amidase NIT2-like [Hydra vulgaris]	2.4e-102	OG0000712	154	48	NA	NA	NA	NA	NA	NA
HyS0032.155	0	0.805057	0.561	0.044	0	I-Cells	6	ISC/prog	GDP-fucose protein O-fucosyltransferase	NA	fucosyltransferase activity	Notch signaling pathway	endomembrane system	XP_002164324.2 PREDICTED: GDP-fucose protein O-fucosyltransferase 1-like [Hydra vulgaris]	4.6e-118	OG0002279	71	44	NA	NA	NA	NA	NA	NA
HyS0032.229	2.15e-239	0.568881	0.397	0.029	4.73e-235	I-Cells	6	ISC/prog	RNA-binding	NA	RNA binding	mRNA splicing, via spliceosome	U12-type spliceosomal complex	XP_002155289.2 PREDICTED: RNA-binding protein 40-like [Hydra vulgaris]	2e-141	OG0001993	77	39	NA	NA	NA	NA	NA	NA
HyS0032.246	9.16e-211	0.65369	0.458	0.047	2.02e-206	I-Cells	6	ISC/prog	Ubiquitin-conjugating enzyme	NA	ATP binding	embryonic heart tube elongation	nucleus	XP_012557628.1 PREDICTED: SUMO-conjugating enzyme UBC9-A-like [Hydra vulgaris]	9.2e-57	OG0003116	61	46	NA	NA	NA	NA	NA	NA
HyS0032.248	0	0.681636	0.428	0.021	0	I-Cells	6	ISC/prog	Metalloendopeptidase	DDX56	ATP binding	positive regulation of neuron projection development	nucleolus	XP_002156431.2 PREDICTED: probable ATP-dependent RNA helicase DDX56 [Hydra vulgaris]	3.8e-192	OG0004372	52	46	NA	NA	NA	NA	NA	NA
HyS0032.42	2.38e-261	0.598635	0.428	0.031	5.24e-257	I-Cells	6	ISC/prog	THO complex subunit 3	THOC3	RNA binding	mRNA export from nucleus	THO complex part of transcription export complex	XP_012561340.1 PREDICTED: THO complex subunit 3-like [Hydra vulgaris]	1.2e-169	OG0004250	53	47	NA	NA	NA	NA	NA	NA
HyS0032.88	0	0.558559	0.342	0.012	0	I-Cells	6	ISC/prog	Queuine tRNA-ribosyltransferase accessory subunit 2	QTRT2	queuine tRNA-ribosyltransferase activity	tRNA modification	mitochondrial outer membrane	XP_012554212.1 PREDICTED: queuine tRNA-ribosyltransferase subunit QTRTD1-like [Hydra vulgaris]	7.6e-121	OG0004787	50	45	NA	NA	NA	NA	NA	NA
HyS0034.113	5.42e-254	0.719113	0.472	0.041	1.19e-249	I-Cells	6	ISC/prog	Polymyositis/scleroderma autoantigen 1	EXOSC9	mRNA 3'-UTR AU-rich region binding	RNA processing	exosome (RNase complex)	XP_002160444.1 PREDICTED: exosome complex component rrp45-like [Hydra vulgaris]	6.4e-135	OG0000710	154	48	NA	NA	NA	NA	NA	NA
HyS0034.191	7e-222	0.679747	0.483	0.049	1.54e-217	I-Cells	6	ISC/prog	Zinc finger CCCH domain-containing protein 18	WDR61	protein binding	positive regulation of histone H3-K79 methylation	transcriptionally active chromatin	XP_002157745.2 PREDICTED: WD repeat-containing protein 61-like, partial [Hydra vulgaris]	1.7e-48	OG0005479	46	44	NA	NA	NA	NA	NA	NA
HyS0034.63	3.29e-234	0.515432	0.364	0.025	7.24e-230	I-Cells	6	ISC/prog	OTU domain-containing protein 4	OTUD4	Lys63-specific deubiquitinase activity	regulation of protein K48-linked deubiquitination	nucleus	XP_012559332.1 PREDICTED: uncharacterized protein LOC100215194 [Hydra vulgaris]	2.8e-122	OG0005481	46	34	NA	NA	NA	NA	NA	NA
HyS0036.12	4.9e-251	0.679507	0.419	0.031	1.08e-246	I-Cells	6	ISC/prog	GTP:AMP phosphotransferase, mitochondrial	AK3	nucleoside triphosphate adenylate kinase activity	ITP metabolic process	mitochondrial matrix	XP_012558704.1 PREDICTED: GTP:AMP phosphotransferase AK3, mitochondrial-like [Hydra vulgaris]	7.5e-70	OG0001386	99	48	NA	NA	NA	NA	NA	NA
HyS0037.44	0	1.68623	0.725	0.047	0	I-Cells	6	ISC/prog	NA	NA	NA	NA	NA	XP_004207531.1 PREDICTED: uncharacterized protein LOC101239792 [Hydra vulgaris]	5.2e-14	OG0014901	6	4	YES	YES	YES	NA	NA	NA
HyS0037.6	0	0.69969	0.394	0.004	0	I-Cells	6	ISC/prog	Betaine homocysteine S-methyltransferase	NA	betaine-homocysteine S-methyltransferase activity	methionine biosynthetic process	cytoplasm	XP_022807107.1 betaine--homocysteine S-methyltransferase 1-like isoform X1 [Stylophora pistillata]	5.1e-108	OG0000612	171	35	NA	NA	NA	NA	NA	NA
HyS0038.46	0	0.906621	0.381	0.01	0	I-Cells	6	ISC/prog	Zinc finger protein 2 homolog	NA	nucleic acid binding	regulation of transcription, DNA-templated	actin cytoskeleton	NP_001296714.1 zinc finger protein 16-like [Hydra vulgaris]	2.6e-30	OG0009509	17	15	NA	NA	NA	NA	NA	NA
HyS0039.126	4.18e-279	0.86277	0.464	0.035	9.21e-275	I-Cells	6	ISC/prog	Transmembrane and coiled-coil domain-containing protein 4	ATAD3A	ATP binding	mitochondrion organization	mitochondrion	XP_020916918.1 ATPase family AAA domain-containing protein 3-like [Exaiptasia pallida]	1.1e-171	OG0004489	52	44	NA	NA	NA	NA	NA	NA
HyS0040.102	2.07e-211	0.630768	0.369	0.029	4.55e-207	I-Cells	6	ISC/prog	Leucine-rich repeat protein soc-2-like	NA	NA	NA	integral component of membrane	XP_012556195.1 PREDICTED: leucine-rich repeat protein lrrA-like [Hydra vulgaris]	4.4e-44	OG0009047	19	17	NA	NA	NA	NA	NA	NA
HyS0040.131	4.44e-242	0.62464	0.375	0.025	9.79e-238	I-Cells	6	ISC/prog	NA	NA	NA	NA	NA	NA	NA	Unassigned	NA	NA	NA	NA	NA	NA	NA	NA
HyS0041.40	5.12e-254	0.63594	0.506	0.046	1.13e-249	I-Cells	6	ISC/prog	Signal recognition particle subunit SRP68	SRP68	endoplasmic reticulum signal peptide binding	SRP-dependent cotranslational protein targeting to membrane	signal recognition particle, endoplasmic reticulum targeting	XP_002159585.2 PREDICTED: signal recognition particle subunit SRP68-like [Hydra vulgaris]	1.1e-152	OG0002770	64	49	NA	NA	NA	NA	NA	NA
HyS0041.82	2.87e-240	0.620987	0.394	0.029	6.32e-236	I-Cells	6	ISC/prog	U3 small nucleolar RNA-associated protein 6 homolog	NA	snoRNA binding	maturation of SSU-rRNA from tricistronic rRNA transcript (SSU-rRNA, 5.8S rRNA, LSU-rRNA)	NA	XP_002156430.3 PREDICTED: U3 small nucleolar RNA-associated protein 6 homolog [Hydra vulgaris]	1.2e-136	OG0003211	60	47	NA	NA	NA	NA	NA	NA
HyS0042.60	1.51e-238	0.472961	0.353	0.022	3.34e-234	I-Cells	6	ISC/prog	IMP U3 small nucleolar ribonucleoprotein 3	IMP3	rRNA binding	rRNA processing	Mpp10 complex	XP_002157904.1 PREDICTED: U3 small nucleolar ribonucleoprotein protein IMP3-like [Hydra vulgaris]	1.2e-81	OG0003538	57	49	NA	NA	NA	NA	NA	NA
HyS0043.13	1.3e-255	0.769801	0.494	0.044	2.87e-251	I-Cells	6	ISC/prog	RNA helicase	DDX18	RNA helicase activity	myeloid cell differentiation	nucleolus	XP_002156165.1 PREDICTED: ATP-dependent RNA helicase HAS1-like [Hydra vulgaris]	1.4e-249	OG0001157	112	49	NA	NA	NA	NA	NA	NA
HyS0045.75	7.21e-206	0.562678	0.325	0.022	1.59e-201	I-Cells	6	ISC/prog	Interferon regulatory factor	NA	transcription regulatory region DNA binding	negative regulation of cell population proliferation	nucleus	XP_020780583.1 interferon regulatory factor 1-like isoform X2 [Boleophthalmus pectinirostris]	6.9e-34	OG0000556	183	36	NA	NA	NA	NA	NA	NA
HyS0046.39	2.17e-223	0.571601	0.367	0.026	4.79e-219	I-Cells	6	ISC/prog	Glycosaminoglycan xylosylkinase	FAM20B	transferase activity, transferring phosphorus-containing groups	proteoglycan biosynthetic process	Golgi apparatus	XP_002154271.1 PREDICTED: glycosaminoglycan xylosylkinase-like [Hydra vulgaris]	2.5e-127	OG0001945	78	36	NA	NA	NA	NA	NA	NA
HyS0047.119	0	0.843731	0.528	0.032	0	I-Cells	6	ISC/prog	zinc finger protein 330 homolog	ZNF330	zinc ion binding	skeletal muscle fiber development	nucleus	XP_004205720.1 PREDICTED: zinc finger protein 330 homolog [Hydra vulgaris]	1.2e-113	OG0005853	44	39	NA	NA	NA	NA	NA	NA
HyS0049.100	3.39e-266	0.38846	0.278	0.01	7.47e-262	I-Cells	6	ISC/prog	Melanocyte proliferating gene 1	NA	nucleic acid binding	locomotory exploration behavior	nucleus	XP_002163350.3 PREDICTED: UPF0160 protein MYG1, mitochondrial-like [Hydra vulgaris]	7.6e-144	OG0003938	55	48	NA	NA	NA	NA	NA	NA
HyS0049.47	9.07e-236	0.6711	0.442	0.038	2e-231	I-Cells	6	ISC/prog	NA	NA	NA	NA	NA	XP_020602184.1 alpha-2-macroglobulin receptor-associated protein-like [Orbicella faveolata]	4.6e-23	OG0006750	37	32	NA	NA	NA	NA	NA	NA
HyS0049.50	3.66e-290	0.60983	0.389	0.021	8.07e-286	I-Cells	6	ISC/prog	tRNA (guanine-N(7)-)-methyltransferase non-catalytic subunit wuho	WUHO	methyltransferase activity	RNA (guanine-N7)-methylation	nucleus	XP_002157025.3 PREDICTED: tRNA (guanine-N(7)-)-methyltransferase non-catalytic subunit wuho-like [Hydra vulgaris]	1.1e-62	OG0005203	48	43	NA	NA	NA	NA	NA	NA
HyS0051.175	3.48e-218	0.424791	0.289	0.015	7.66e-214	I-Cells	6	ISC/prog	Pre-mRNA processing factor 31	PRPF31	U4atac snRNA binding	spliceosomal tri-snRNP complex assembly	U4/U6 x U5 tri-snRNP complex	XP_002156371.2 PREDICTED: U4/U6 small nuclear ribonucleoprotein Prp31-like [Hydra vulgaris]	7e-225	OG0003522	57	47	NA	NA	NA	NA	NA	NA
HyS0051.30	0	0.749455	0.489	0.034	0	I-Cells	6	ISC/prog	Adenylate kinase isoenzyme 6	AK6	adenylate kinase activity	nucleoside monophosphate phosphorylation	Cajal body	XP_022790028.1 adenylate kinase isoenzyme 6-like [Stylophora pistillata]	5e-69	OG0005687	45	42	NA	NA	NA	NA	NA	NA
HyS0053.20	0	0.904269	0.511	0.026	0	I-Cells	6	ISC/prog	Pre-mRNA processing factor 4	PRPF4	U6 snRNA binding	posterior lateral line neuromast primordium migration	U4/U6 snRNP	XP_012564074.1 PREDICTED: U4/U6 small nuclear ribonucleoprotein Prp4-like [Hydra vulgaris]	1.3e-107	OG0002781	64	47	NA	NA	NA	NA	NA	NA
HyS0053.40	1.29e-253	0.604394	0.442	0.034	2.85e-249	I-Cells	6	ISC/prog	Set and mynd domain-containing	SMYD5	methyltransferase activity	primitive hemopoiesis	nucleus	XP_002163562.2 PREDICTED: SET and MYND domain-containing protein 5-like [Hydra vulgaris]	4.2e-135	OG0003784	56	39	NA	NA	NA	NA	NA	NA
HyS0056.39	0	0.861227	0.528	0.039	0	I-Cells	6	ISC/prog	Uracil phosphoribosyl transferase	NA	transferase activity, transferring glycosyl groups	nucleoside metabolic process	NA	XP_002158556.1 PREDICTED: uracil phosphoribosyltransferase-like [Hydra vulgaris]	1.9e-79	OG0002915	62	46	NA	NA	NA	NA	NA	NA
HyS0056.74	4.44e-207	0.645749	0.447	0.045	9.78e-203	I-Cells	6	ISC/prog	Sec1 family domain-containing protein 2	SCFD2	NA	vesicle docking involved in exocytosis	NA	XP_012555935.1 PREDICTED: sec1 family domain-containing protein 2-like [Hydra vulgaris]	4e-212	OG0005972	43	35	NA	NA	NA	NA	NA	NA
HyS0058.86	1.9e-305	0.579961	0.4	0.021	4.19e-301	I-Cells	6	ISC/prog	Short-chain dehydrogenase	NA	oxidoreductase activity	oxidation-reduction process	endoplasmic reticulum membrane	XP_027040136.1 inactive hydroxysteroid dehydrogenase-like protein 1 isoform X1 [Pocillopora damicornis]	3.2e-64	OG0000536	191	48	NA	NA	NA	NA	NA	NA
HyS0060.98	8.62e-257	0.656164	0.383	0.024	1.9e-252	I-Cells	6	ISC/prog	UDP-N-acetylglucosamine transferase subunit ALG14	ALG14	transferase activity	dolichol-linked oligosaccharide biosynthetic process	UDP-N-acetylglucosamine transferase complex	XP_004211849.2 PREDICTED: UDP-N-acetylglucosamine transferase subunit ALG14 homolog [Hydra vulgaris]	2.4e-47	OG0004468	52	46	NA	NA	NA	NA	NA	NA
HyS0067.22	1.32e-227	0.759654	0.483	0.048	2.91e-223	I-Cells	6	ISC/prog	SynMuv product domain containing protein	NKAP	chromatin binding	Notch signaling pathway	ESC/E(Z) complex	XP_004206648.1 PREDICTED: NF-kappa-B-activating protein-like [Hydra vulgaris]	2.2e-61	OG0005086	48	43	NA	NA	NA	NA	NA	NA
HyS0068.20	2.58e-211	0.418234	0.269	0.014	5.68e-207	I-Cells	6	ISC/prog	DEAD (Asp-Glu-Ala-Asp) box polypeptide 20	DDX20	helicase activity	regulation of steroid biosynthetic process	SMN complex	XP_012566758.1 PREDICTED: probable ATP-dependent RNA helicase ddx20 isoform X1 [Hydra vulgaris]	1.9e-144	OG0000379	243	49	NA	NA	NA	NA	NA	NA
HyS0070.75	1.05e-205	0.35851	0.267	0.013	2.3e-201	I-Cells	6	ISC/prog	NA	NA	NA	NA	NA	NA	NA	OG0015482	5	5	NA	NA	NA	NA	NA	NA
HyS0073.14	0	0.881491	0.539	0.04	0	I-Cells	6	ISC/prog	LOW QUALITY PROTEIN: zinc finger protein interacting with ribonucleoprotein K-like	NA	nucleic acid binding	regulation of transcription, DNA-templated	nucleus	XP_012562910.1 PREDICTED: zinc finger protein 816-like [Hydra vulgaris]	5.2e-14	OG0013859	7	5	NA	NA	NA	NA	NA	NA
HyS0073.2	2.44e-288	0.518064	0.375	0.02	5.37e-284	I-Cells	6	ISC/prog	Biotin-acetyl-CoA-carboxylase ligase	NA	biotin-[acetyl-CoA-carboxylase] ligase activity	cellular protein modification process	polytene chromosome	XP_012565811.1 PREDICTED: biotin--protein ligase-like isoform X1 [Hydra vulgaris]	1.4e-97	OG0004405	52	47	NA	NA	NA	NA	NA	NA
HyS0076.38	2.09e-226	0.585367	0.4	0.031	4.61e-222	I-Cells	6	ISC/prog	NA	NA	NA	NA	NA	NA	NA	OG0030978	2	2	YES	YES	YES	YES	YES	NA
HyS0089.38	0	0.73968	0.433	0.023	0	I-Cells	6	ISC/prog	Mitochondrial ornithine carbamoyltransferase	NA	amino acid binding	cellular amino acid metabolic process	mitochondrion	XP_026768509.1 ornithine carbamoyltransferase, mitochondrial-like [Pangasianodon hypophthalmus]	1.4e-110	OG0005690	45	32	NA	NA	NA	NA	NA	NA
HyS0090.12	1.89e-236	0.754095	0.478	0.044	4.16e-232	I-Cells	6	ISC/prog	NA	NA	NA	NA	NA	XP_012558499.1 PREDICTED: uncharacterized protein LOC101240440 [Hydra vulgaris]	5.4e-44	OG0007086	34	28	NA	NA	NA	NA	NA	NA
HyS0091.36	4.98e-287	0.75532	0.408	0.025	1.1e-282	I-Cells	6	ISC/prog	DNA-directed RNA polymerase IIa	NA	DNA-directed 5'-3' RNA polymerase activity	transcription, DNA-templated	RNA polymerase II, core complex	XP_012565800.1 PREDICTED: DNA-directed RNA polymerases I, II, and III subunit RPABC2-like [Hydra vulgaris]	2.7e-35	OG0004756	50	45	NA	NA	NA	NA	NA	NA
HyS0097.14	7.24e-207	0.676489	0.469	0.049	1.6e-202	I-Cells	6	ISC/prog	DNA polymerase delta small subunit	POLD2	DNA-directed DNA polymerase activity	DNA biosynthetic process	delta DNA polymerase complex	XP_012562013.1 PREDICTED: DNA polymerase delta subunit 2-like [Hydra vulgaris]	1.1e-140	OG0004312	53	47	NA	NA	NA	NA	NA	NA
HyS0097.17	0	0.885159	0.525	0.028	0	I-Cells	6	ISC/prog	GPN-loop GTPase	GPN1	GTPase activity	NA	nucleus	XP_002160539.2 PREDICTED: GPN-loop GTPase 1-like [Hydra vulgaris]	4e-126	OG0003812	55	47	NA	NA	NA	NA	NA	NA
HyS0102.33	0	1.98225	0.475	0.018	0	I-Cells	6	ISC/prog	Phospholipase A2	NA	phospholipase A2 activity	arachidonic acid secretion	extracellular region	XP_002157393.1 PREDICTED: phospholipase A2-like [Hydra vulgaris]	1.2e-20	OG0000789	142	31	NA	NA	NA	NA	NA	NA
HyS0109.15	2.02e-235	0.557518	0.436	0.037	4.44e-231	I-Cells	6	ISC/prog	NA	NA	NA	NA	NA	XP_012558475.1 PREDICTED: AP-5 complex subunit sigma-1-like [Hydra vulgaris]	9.9e-34	OG0007444	31	30	NA	NA	NA	NA	NA	NA
HyS0118.5	7.43e-241	0.52505	0.381	0.026	1.64e-236	I-Cells	6	ISC/prog	Origin recognition complex subunit 1	ORC1	chromatin binding	DNA replication	nucleus	XP_026069302.1 origin recognition complex subunit 1-like isoform X3 [Carassius auratus]	2.7e-134	OG0001177	111	49	NA	NA	NA	NA	NA	NA
HyS0137.12	2.72e-240	0.768412	0.481	0.045	6e-236	I-Cells	6	ISC/prog	Deoxyhypusine hydroxylase	DOHH	deoxyhypusine monooxygenase activity	peptidyl-lysine modification to peptidyl-hypusine	extrinsic component of endoplasmic reticulum membrane	XP_002154724.3 PREDICTED: deoxyhypusine hydroxylase-like [Hydra vulgaris]	2.1e-107	OG0002839	63	47	NA	NA	NA	NA	NA	NA
HyS0142.13	5e-251	0.70983	0.483	0.044	1.1e-246	I-Cells	6	ISC/prog	Proteasome assembly chaperone 2	NA	NA	NA	proteasome complex	XP_020606694.1 proteasome assembly chaperone 2-like [Orbicella faveolata]	1.2e-33	OG0005710	45	43	NA	NA	NA	NA	NA	NA
HyS0155.10	0	1.85543	0.733	0.044	0	I-Cells	6	ISC/prog	Ribosome biogenesis protein WDR12	NOP58	snoRNA binding	snoRNA localization	box C/D snoRNP complex	XP_004210509.2 PREDICTED: nucleolar protein 58-like [Hydra vulgaris]	4.4e-190	OG0004873	50	49	NA	NA	NA	NA	NA	NA
HyS0377.3	1.55e-215	0.396397	0.275	0.014	3.42e-211	I-Cells	6	ISC/prog	NA	NA	NA	NA	NA	XP_002162176.1 PREDICTED: glutathione S-transferase-like [Hydra vulgaris]	2.5e-27	OG0000129	502	48	NA	NA	NA	NA	NA	NA
HyS0593.1	8.79e-260	0.58938	0.403	0.027	1.94e-255	I-Cells	6	ISC/prog	Mitochondrial enoyl-CoA hydratase	ECHS1	enoyl-CoA hydratase activity	fatty acid beta-oxidation	mitochondrion	XP_012555931.1 PREDICTED: enoyl-CoA hydratase, mitochondrial-like [Hydra vulgaris]	2.9e-109	OG0003147	60	42	NA	NA	NA	NA	NA	NA
HyS2298.1	0	1.04254	0.575	0.042	0	I-Cells	6	ISC/prog	Hemocyte protein-glutamine gamma-glutamyltransferase	TGM6	protein-glutamine gamma-glutamyltransferase activity	peptide cross-linking	collagen-containing extracellular matrix	XP_002590206.1 hypothetical protein BRAFLDRAFT_128282 [Branchiostoma floridae]	6e-121	OG0000500	199	39	NA	NA	NA	NA	NA	NA
HyS2601.1	9.98e-280	0.680291	0.456	0.033	2.2e-275	I-Cells	6	ISC/prog	WD repeat-containing protein 43	NA	NA	NA	NA	XP_012561395.1 PREDICTED: WD repeat-containing protein 43-like [Hydra vulgaris]	2.1e-147	OG0004598	51	46	NA	NA	NA	NA	NA	NA
HyS3833.1	0	0.815325	0.422	0.023	0	I-Cells	6	ISC/prog	RNA-directed DNA polymerase from mobile element jockey	NA	nucleic acid binding	DNA integration	integral component of membrane	XP_012555623.1 PREDICTED: uncharacterized protein LOC100197852 [Hydra vulgaris]	0	OG0000005	2191	27	NA	NA	NA	NA	NA	NA
HyS4747.1	0	0.920384	0.511	0.012	0	I-Cells	6	ISC/prog	Pyrroline-5-carboxylate reductase	PROC	pyrroline-5-carboxylate reductase activity	proline biosynthetic process	cytoplasm	XP_002159839.1 PREDICTED: pyrroline-5-carboxylate reductase 1, mitochondrial-like [Hydra vulgaris]	1e-111	OG0001315	102	48	NA	NA	NA	NA	NA	NA
HyS0001.172	6.21e-223	0.575815	0.251	0.01	1.37e-218	I-Cells	7	ISC/germ	Kinesin motor domain-containing protein (Fragment)	KIF14	microtubule motor activity	microtubule-based movement	Flemming body	XP_012564263.1 PREDICTED: kinesin-like protein KIF14 [Hydra vulgaris]	0	OG0000165	431	45	NA	NA	NA	NA	NA	NA
HyS0001.183	0	0.621943	0.593	0.043	0	I-Cells	7	ISC/germ	NA	NA	NA	NA	NA	NA	NA	OG0023436	3	2	YES	YES	YES	YES	YES	NA
HyS0001.228	0	1.59987	0.646	0.037	0	I-Cells	7	ISC/germ	DNA helicase	RUVBL2	5'-3' DNA helicase activity	DNA duplex unwinding	R2TP complex	XP_002165507.1 PREDICTED: ruvB-like 2 [Hydra vulgaris]	4.5e-232	OG0003428	58	48	NA	NA	NA	NA	NA	NA
HyS0001.261	4.99e-230	0.544157	0.292	0.015	1.1e-225	I-Cells	7	ISC/germ	NA	NA	NA	NA	NA	XP_012558079.1 PREDICTED: meiosis 1 arrest protein-like [Hydra vulgaris]	3.2e-49	OG0006725	37	34	NA	NA	NA	NA	NA	NA
HyS0001.303	8.28e-232	0.86917	0.448	0.041	1.82e-227	I-Cells	7	ISC/germ	Peter pan	PPAN	G protein-coupled receptor activity	G protein-coupled receptor signaling pathway	preribosome, large subunit precursor	XP_002163125.3 PREDICTED: suppressor of SWI4 1 homolog [Hydra vulgaris]	1.5e-131	OG0003261	59	49	NA	NA	NA	NA	NA	NA
HyS0001.431	0	3.41448	0.919	0.025	0	I-Cells	7	ISC/germ	NA	NA	NA	NA	NA	AOF43145.1 histone H2B.6 [Hydractinia echinata]	2.5e-40	OG0000131	496	47	NA	NA	NA	NA	NA	NA
HyS0001.433	0	1.33188	0.448	0.004	0	I-Cells	7	ISC/germ	NA	NA	NA	NA	NA	AOF43145.1 histone H2B.6 [Hydractinia echinata]	1.9e-40	OG0000131	496	47	NA	NA	NA	NA	NA	NA
HyS0001.457	0	1.7705	0.699	0.043	0	I-Cells	7	ISC/germ	Dynein assembly factor with WDR repeat domains 1	DAW1	calcium ion binding	cerebrospinal fluid circulation	cilium	XP_012558855.1 PREDICTED: dynein assembly factor with WDR repeat domains 1-like [Hydra vulgaris]	1.6e-60	OG0005990	43	39	NA	NA	NA	NA	NA	NA
HyS0001.87	0	0.906993	0.421	0.011	0	I-Cells	7	ISC/germ	mutS protein homolog 4	MSH4	mismatched DNA binding	mismatch repair	recombination nodule	XP_015766352.1 PREDICTED: mutS protein homolog 4-like [Acropora digitifera]	7.8e-291	OG0002843	63	47	NA	NA	NA	NA	NA	NA
HyS0002.126	0	1.08598	0.518	0.039	0	I-Cells	7	ISC/germ	NA	DECR1	2,4-dienoyl-CoA reductase (NADPH) activity	positive regulation of cold-induced thermogenesis	nucleoplasm	XP_002165656.1 PREDICTED: 2,4-dienoyl-CoA reductase, mitochondrial-like [Hydra vulgaris]	4.1e-117	OG0000977	125	42	NA	NA	NA	NA	NA	NA
HyS0002.334	0	1.70816	0.655	0.011	0	I-Cells	7	ISC/germ	Salt-induced AAA-Type ATPase	NA	ATP binding	vacuole organization	multivesicular body	XP_002157293.3 PREDICTED: vacuolar protein sorting-associated protein 4-like [Hydra vulgaris]	7.1e-125	OG0001473	95	49	NA	NA	NA	NA	NA	NA
HyS0002.34	0	1.11489	0.518	0.028	0	I-Cells	7	ISC/germ	NA	NA	NA	NA	NA	XP_002165878.2 PREDICTED: chromodomain Y-like protein 2 [Hydra vulgaris]	7.1e-131	OG0000324	279	49	NA	NA	NA	NA	NA	NA
HyS0002.456	0	1.24404	0.61	0.026	0	I-Cells	7	ISC/germ	Importin N-terminal domain-containing protein (Fragment)	IPO4	Ran GTPase binding	protein import into nucleus	cell	XP_012556174.1 PREDICTED: importin-4-like isoform X1 [Hydra vulgaris]	0	OG0003443	58	41	NA	NA	NA	NA	NA	NA
HyS0002.97	0	1.66858	0.747	0.047	0	I-Cells	7	ISC/germ	Flap endonuclease 1-B	FEN1	5'-flap endonuclease activity	DNA replication, removal of RNA primer	nucleoplasm	XP_027047559.1 flap endonuclease 1-like isoform X1 [Pocillopora damicornis]	1.3e-154	OG0003330	59	49	NA	NA	NA	NA	NA	NA
HyS0003.399	0	1.00377	0.454	0.012	0	I-Cells	7	ISC/germ	NA	NA	NA	NA	NA	NA	NA	OG0031057	2	2	YES	YES	YES	YES	YES	NA
HyS0003.538	0	0.558937	0.304	0.005	0	I-Cells	7	ISC/germ	NA	NA	NA	NA	NA	NA	NA	OG0023538	3	2	YES	YES	YES	YES	YES	NA
HyS0003.541	0	0.57635	0.304	0.006	0	I-Cells	7	ISC/germ	NA	NA	NA	NA	NA	NA	NA	OG0023538	3	2	YES	YES	YES	YES	YES	NA
HyS0003.566	0	3.05355	0.872	0.022	0	I-Cells	7	ISC/germ	Glycerate kinase	NA	protein heterodimerization activity	nucleosome assembly	nucleosome	AOF43148.1 histone H2B.3 [Hydractinia echinata]	2.7e-40	OG0000131	496	47	NA	NA	NA	NA	NA	NA
HyS0004.176	0	1.80412	0.76	0.045	0	I-Cells	7	ISC/germ	Zygotic DNA replication licensing factor mcm6-B	MCM6	DNA helicase activity	DNA replication initiation	MCM complex	XP_012558949.1 PREDICTED: zygotic DNA replication licensing factor mcm6-B-like isoform X1 [Hydra vulgaris]	0	OG0003063	61	47	NA	NA	NA	NA	NA	NA
HyS0004.18	0	1.09076	0.462	0.006	0	I-Cells	7	ISC/germ	Heat shock transcription factor, Y-linked	NA	sequence-specific DNA binding	regulation of transcription, DNA-templated	nucleus	XP_012558243.1 PREDICTED: heat shock factor protein 2-like [Hydra vulgaris]	1.7e-33	OG0000867	133	48	NA	NA	NA	NA	NA	NA
HyS0004.241	5.65e-278	0.790494	0.404	0.025	1.24e-273	I-Cells	7	ISC/germ	Telomere-associated protein RIF1 (Fragment)	NA	NA	NA	NA	XP_012566783.1 PREDICTED: telomere-associated protein RIF1-like isoform X1 [Hydra vulgaris]	2.2e-271	OG0003908	55	36	NA	NA	NA	NA	NA	NA
HyS0004.300	1.25e-224	0.537393	0.276	0.013	2.75e-220	I-Cells	7	ISC/germ	D-3-phosphoglycerate dehydrogenase	NA	phosphoglycerate dehydrogenase activity	L-serine biosynthetic process	integral component of membrane	ACS12894.1 3-phosphoglycerate dehydrogenase-like protein [Chironex fleckeri]	1.5e-137	OG0000564	180	47	NA	NA	NA	NA	NA	NA
HyS0004.380	0	1.76504	0.76	0.046	0	I-Cells	7	ISC/germ	Condensin complex subunit	NCAPD2	histone binding	mitotic chromosome condensation	nucleus	XP_012566984.1 PREDICTED: condensin complex subunit 1-like [Hydra vulgaris]	0	OG0002637	66	49	NA	NA	NA	NA	NA	NA
HyS0004.488	5.69e-293	0.692555	0.351	0.016	1.25e-288	I-Cells	7	ISC/germ	Mitotic and DNA damage checkpoint protein hus1 (Fragment)	NA	kinase activity	DNA damage checkpoint	checkpoint clamp complex	XP_002165694.2 PREDICTED: checkpoint protein HUS1-like isoform X1 [Hydra vulgaris]	8.6e-103	OG0004212	53	47	NA	NA	NA	NA	NA	NA
HyS0004.83	2.22e-245	0.641816	0.309	0.015	4.89e-241	I-Cells	7	ISC/germ	NA	NA	NA	NA	NA	NA	NA	OG0000364	252	28	NA	NA	NA	NA	NA	NA
HyS0005.198	0	1.96691	0.76	0.037	0	I-Cells	7	ISC/germ	Ubiquitin like with PHD and ring finger domains 1	UHRF1	metal ion binding	maintenance of DNA methylation	nucleus	XP_022806103.1 E3 ubiquitin-protein ligase UHRF1-like isoform X2 [Stylophora pistillata]	1.8e-243	OG0002049	76	35	NA	NA	NA	NA	NA	NA
HyS0005.273	2.91e-272	0.889221	0.379	0.023	6.4e-268	I-Cells	7	ISC/germ	Carbonyl reductase	CBR1	carbonyl reductase (NADPH) activity	oxidation-reduction process	mRNA cleavage factor complex	XP_002157640.1 PREDICTED: carbonyl reductase [NADPH] 1-like [Hydra vulgaris]	5.9e-99	OG0000699	156	43	NA	NA	NA	NA	NA	NA
HyS0005.310	2.51e-210	0.576354	0.331	0.023	5.52e-206	I-Cells	7	ISC/germ	Caseinolytic peptidase B protein homolog	CLPB	ATP binding	cellular response to heat	mitochondrion	XP_012558158.1 PREDICTED: caseinolytic peptidase B protein homolog isoform X1 [Hydra vulgaris]	3.9e-201	OG0001625	89	45	NA	NA	NA	NA	NA	NA
HyS0005.350	0	1.34208	0.574	0.005	0	I-Cells	7	ISC/germ	NA	NA	NA	NA	NA	NA	NA	OG0030795	2	2	YES	YES	YES	YES	YES	NA
HyS0005.374	1.22e-221	0.973526	0.474	0.048	2.69e-217	I-Cells	7	ISC/germ	NA	NA	NA	NA	NA	XP_012560361.1 PREDICTED: uncharacterized protein LOC101239744 isoform X1 [Hydra vulgaris]	4.3e-100	OG0002160	73	31	NA	NA	NA	NA	NA	NA
HyS0005.392	0	0.90681	0.426	0.018	0	I-Cells	7	ISC/germ	DNA primase large subunit	PRIM2	DNA primase activity	DNA replication, synthesis of RNA primer	alpha DNA polymerase:primase complex	XP_002158954.2 PREDICTED: DNA primase large subunit-like [Hydra vulgaris]	5.2e-170	OG0002415	69	47	NA	NA	NA	NA	NA	NA
HyS0005.78	2.07e-254	0.818877	0.343	0.019	4.56e-250	I-Cells	7	ISC/germ	NA	NA	NA	NA	NA	NA	NA	OG0022091	3	3	YES	YES	YES	YES	NA	NA
HyS0006.212	3.1e-288	0.800022	0.393	0.023	6.84e-284	I-Cells	7	ISC/germ	NA	NA	NA	NA	NA	XP_019640370.1 PREDICTED: uncharacterized protein LOC109482116 [Branchiostoma belcheri]	1.9e-39	OG0006407	40	37	NA	NA	NA	NA	NA	NA
HyS0006.243	0	1.1223	0.524	0.035	0	I-Cells	7	ISC/germ	Eukaryotic rRNA processing	EBNA1BP2	nucleic acid binding	ribosomal large subunit biogenesis	nuclear periphery	XP_002166032.1 PREDICTED: probable rRNA-processing protein EBP2 [Hydra vulgaris]	1.1e-52	OG0004696	51	46	NA	NA	NA	NA	NA	NA
HyS0006.284	0	1.14945	0.588	0.045	0	I-Cells	7	ISC/germ	p-loop containing nucleoside triphosphate hydrolase protein	CHTF18	DNA clamp loader activity	regulation of DNA-directed DNA polymerase activity	DNA replication factor C complex	XP_004211521.2 PREDICTED: chromosome transmission fidelity protein 18 homolog [Hydra vulgaris]	1.3e-248	OG0003095	61	48	NA	NA	NA	NA	NA	NA
HyS0007.133	0	1.43557	0.635	0.028	0	I-Cells	7	ISC/germ	chromatin assembly factor 1 subunit A	NA	chromo shadow domain binding	nucleosome assembly	CAF-1 complex	XP_002730891.1 PREDICTED: chromatin assembly factor 1 subunit A-like [Saccoglossus kowalevskii]	8.3e-23	OG0003667	56	44	NA	NA	NA	NA	NA	NA
HyS0007.140	0	1.24917	0.568	0.029	0	I-Cells	7	ISC/germ	Transcription factor IIS TFIIS	NA	GTP binding	nucleosome assembly	CAF-1 complex	PFX34907.1 Chromatin assembly factor 1 subunit A-A [Stylophora pistillata]	6.6e-10	OG0003667	56	44	NA	NA	NA	NA	NA	NA
HyS0007.336	5.55e-282	0.966584	0.468	0.035	1.22e-277	I-Cells	7	ISC/germ	TIMELESS-interacting protein (Fragment)	NA	NA	replication fork protection	nucleus	XP_004206439.1 PREDICTED: TIMELESS-interacting protein-like [Hydra vulgaris]	9.1e-30	OG0003800	55	45	NA	NA	NA	NA	NA	NA
HyS0007.356	0	1.11373	0.529	0.036	0	I-Cells	7	ISC/germ	NA	NA	NA	NA	NA	KXJ11892.1 Coiled-coil domain-containing protein 122 [Exaiptasia pallida]	3.4e-06	OG0009903	15	14	NA	NA	NA	NA	NA	NA
HyS0008.251	0	0.747328	0.398	0.015	0	I-Cells	7	ISC/germ	General transcription factor 3C polypeptide 6	NA	NA	NA	NA	XP_012557970.1 PREDICTED: general transcription factor 3C polypeptide 6-like [Hydra vulgaris]	6.2e-23	OG0007027	35	32	NA	NA	NA	NA	NA	NA
HyS0008.358	0	1.18476	0.518	0.033	0	I-Cells	7	ISC/germ	Polycystic kidney disease 1 like 2a	NA	calcium channel activity	detection of mechanical stimulus	integral component of membrane	XP_027038203.1 uncharacterized protein LOC113666615 [Pocillopora damicornis]	0	OG0000062	767	40	NA	NA	NA	NA	NA	NA
HyS0009.194	0	1.99579	0.816	0.034	0	I-Cells	7	ISC/germ	NA	NA	NA	NA	NA	NA	NA	OG0015574	5	5	YES	NA	NA	NA	NA	NA
HyS0009.198	3.03e-234	0.560467	0.284	0.013	6.68e-230	I-Cells	7	ISC/germ	Diphthamide biosynthesis protein 1	DPH1	transferase activity	peptidyl-diphthamide metabolic process	cell junction	XP_002161454.2 PREDICTED: diphthamide biosynthesis protein 1-like [Hydra vulgaris]	3.5e-169	OG0004631	51	47	NA	NA	NA	NA	NA	NA
HyS0009.200	0	0.839524	0.423	0.017	0	I-Cells	7	ISC/germ	Replication factor C subunit 2	RFC2	DNA binding	DNA replication	DNA replication factor C complex	XP_002160048.3 PREDICTED: replication factor C subunit 2-like [Hydra vulgaris]	1.2e-159	OG0003342	59	49	NA	NA	NA	NA	NA	NA
HyS0009.222	2.48e-265	0.72425	0.376	0.022	5.47e-261	I-Cells	7	ISC/germ	Leucine-rich repeat-containing protein 6	LRRC6	cysteine-type peptidase activity	cilium-dependent cell motility	cilium	XP_002157387.1 PREDICTED: protein tilB homolog [Hydra vulgaris]	8.1e-98	OG0006257	41	39	NA	NA	NA	NA	NA	NA
HyS0009.240	3.8e-207	0.541194	0.281	0.016	8.38e-203	I-Cells	7	ISC/germ	NA	NA	NA	NA	NA	NA	NA	OG0031207	2	2	YES	YES	YES	YES	YES	NA
HyS0009.288	8.19e-265	0.800078	0.365	0.021	1.8e-260	I-Cells	7	ISC/germ	cell division control protein 45 homolog	CDC45	chromatin binding	DNA replication initiation	centrosome	XP_012557520.1 PREDICTED: cell division control protein 45 homolog [Hydra vulgaris]	2.4e-143	OG0004630	51	46	NA	NA	NA	NA	NA	NA
HyS0009.295	0	0.923117	0.407	0.019	0	I-Cells	7	ISC/germ	Cell division control protein 45	CDC45	chromatin binding	DNA replication initiation	centrosome	XP_012557520.1 PREDICTED: cell division control protein 45 homolog [Hydra vulgaris]	8.3e-71	OG0004630	51	46	NA	NA	NA	NA	NA	NA
HyS0009.43	0	0.529403	0.281	0.004	0	I-Cells	7	ISC/germ	DNA repair protein RAD51 isogeny 4	NA	DNA-dependent ATPase activity	DNA repair	Rad51B-Rad51C-Rad51D-XRCC2 complex	XP_022086370.1 DNA repair protein RAD51 homolog 4-like [Acanthaster planci]	9.8e-50	OG0000357	256	49	NA	NA	NA	NA	NA	NA
HyS0010.107	0	1.19857	0.582	0.049	0	I-Cells	7	ISC/germ	Importin N-terminal domain-containing protein (Fragment)	IPO9	Ran GTPase binding	intracellular protein transport	nucleus	XP_002164250.2 PREDICTED: importin-9-like [Hydra vulgaris]	0	OG0004282	53	44	NA	NA	NA	NA	NA	NA
HyS0010.289	0	0.872569	0.432	0.018	0	I-Cells	7	ISC/germ	Serine/threonine protein phosphatase	NA	protein serine/threonine phosphatase activity	protein dephosphorylation	nucleoplasm	XP_012556200.1 PREDICTED: probable protein phosphatase 2C 60 [Hydra vulgaris]	1.5e-106	OG0000694	157	49	NA	NA	NA	NA	NA	NA
HyS0010.293	0	0.843723	0.44	0.025	0	I-Cells	7	ISC/germ	Serine/threonine protein phosphatase	NA	protein serine/threonine phosphatase activity	protein dephosphorylation	nucleoplasm	XP_012556200.1 PREDICTED: probable protein phosphatase 2C 60 [Hydra vulgaris]	7.2e-106	OG0000694	157	49	NA	NA	NA	NA	NA	NA
HyS0010.362	2.61e-243	0.621924	0.326	0.018	5.75e-239	I-Cells	7	ISC/germ	Microfibril associated protein 3 like	HPF1	histone binding	peptidyl-serine ADP-ribosylation	nucleus	XP_002169822.3 PREDICTED: UPF0609 protein C4orf27-like [Hydra vulgaris]	1.8e-86	OG0005659	45	39	NA	NA	NA	NA	NA	NA
HyS0011.204	5.17e-231	0.708819	0.443	0.038	1.14e-226	I-Cells	7	ISC/germ	Cilia- and flagella-associated protein 298-A	NA	phosphatidylinositol phosphate 5-phosphatase activity	regulation of cilium movement	presynapse	XP_002155694.1 PREDICTED: UPF0769 protein C21orf59 homolog [Hydra vulgaris]	2.8e-104	OG0006279	41	38	NA	NA	NA	NA	NA	NA
HyS0011.46	0	2.46494	0.699	0.026	0	I-Cells	7	ISC/germ	Bifunctional lysine-specific demethylase and histidyl-hydroxylase MINA	RIOX2	transcription corepressor activity	negative regulation of nucleic acid-templated transcription	transcription factor complex	XP_002167270.3 PREDICTED: bifunctional lysine-specific demethylase and histidyl-hydroxylase MINA-like [Hydra vulgaris]	1.2e-151	OG0001597	90	45	NA	NA	NA	NA	NA	NA
HyS0011.60	0	0.984294	0.493	0.034	0	I-Cells	7	ISC/germ	NA	NA	NA	NA	NA	XP_028409535.1 28S ribosomal protein S6, mitochondrial-like [Dendronephthya gigantea]	9.3e-25	OG0005625	45	42	NA	NA	NA	NA	NA	NA
HyS0012.181	1.06e-241	0.790778	0.401	0.03	2.34e-237	I-Cells	7	ISC/germ	Zinc finger protein 271 (Fragment)	NA	nucleic acid binding	NA	nucleus	ENN76719.1 hypothetical protein YQE_06784, partial [Dendroctonus ponderosae]	6.8e-10	OG0000048	927	49	NA	NA	NA	NA	NA	NA
HyS0012.41	2.5e-247	0.884229	0.471	0.041	5.5e-243	I-Cells	7	ISC/germ	Glutamyl-tRNA amidotransferase subunit B	CATSPER4	calcium activated cation channel activity	flagellated sperm motility	CatSper complex	XP_022798845.1 cation channel sperm-associated protein 4-like isoform X1 [Stylophora pistillata]	3.4e-82	OG0008273	24	21	NA	NA	NA	NA	NA	NA
HyS0012.43	0	0.689503	0.306	0.006	0	I-Cells	7	ISC/germ	Serine/threonine-protein kinase 31 (Fragment)	NA	kinase activity	phosphorylation	NA	RMX56251.1 hypothetical protein pdam_00011674 [Pocillopora damicornis]	5.2e-69	OG0006166	42	28	NA	NA	NA	NA	NA	NA
HyS0012.86	0	1.17492	0.504	0.012	0	I-Cells	7	ISC/germ	DNA methyltransferase	NA	DNA-methyltransferase activity	DNA alkylation	euchromatin	XP_012561137.1 PREDICTED: DNA (cytosine-5)-methyltransferase 3A-like [Hydra vulgaris]	3.9e-230	OG0003093	61	30	NA	NA	NA	NA	NA	NA
HyS0013.229	4.5e-220	0.718459	0.382	0.029	9.91e-216	I-Cells	7	ISC/germ	NA	NA	NA	NA	NA	XP_001625140.1 predicted protein [Nematostella vectensis]	2.5e-21	OG0008404	23	21	NA	NA	NA	NA	NA	NA
HyS0014.119	9.26e-262	0.67891	0.359	0.021	2.04e-257	I-Cells	7	ISC/germ	Mismatch repair endonuclease PMS2	PMS2	mismatched DNA binding	mismatch repair	mismatch repair complex	XP_012555160.1 PREDICTED: mismatch repair endonuclease PMS2-like [Hydra vulgaris]	4.7e-188	OG0001439	96	49	NA	NA	NA	NA	NA	NA
HyS0014.198	0	0.791253	0.418	0.021	0	I-Cells	7	ISC/germ	NA	NA	NA	NA	NA	XP_012560482.1 PREDICTED: uncharacterized protein LOC105846361 [Hydra vulgaris]	4.9e-16	OG0011679	10	7	YES	YES	NA	NA	NA	NA
HyS0014.318	0	1.5754	0.691	0.039	0	I-Cells	7	ISC/germ	NA	NA	NA	NA	NA	NA	NA	OG0030969	2	2	YES	YES	YES	YES	YES	NA
HyS0015.131	0	1.07018	0.457	0.018	0	I-Cells	7	ISC/germ	NA	NA	NA	NA	NA	XP_002154028.2 PREDICTED: schlafen-like protein 1 [Hydra vulgaris]	3.3e-45	OG0001222	108	30	NA	NA	NA	NA	NA	NA
HyS0015.137	0	1.21897	0.563	0.021	0	I-Cells	7	ISC/germ	Cell division control protein 6	CDC6	kinase binding	DNA replication initiation	spindle midzone	NP_001007994.1 cell division control protein 6 homolog [Xenopus tropicalis]	2.9e-109	OG0001177	111	49	NA	NA	NA	NA	NA	NA
HyS0015.246	9.66e-290	0.929811	0.432	0.028	2.13e-285	I-Cells	7	ISC/germ	Non-SMC condensin I complex subunit G	NCAPG	protein binding	mitotic chromosome condensation	condensin complex	XP_012563087.1 PREDICTED: condensin complex subunit 3-like [Hydra vulgaris]	0	OG0002536	67	47	NA	NA	NA	NA	NA	NA
HyS0015.274	0	0.762784	0.337	0.013	0	I-Cells	7	ISC/germ	Rho GTPase-activating protein 11A	NA	GTPase activator activity	signal transduction	cytosol	XP_002164915.2 PREDICTED: rho GTPase-activating protein 11A-like isoform X1 [Hydra vulgaris]	7.5e-143	OG0001236	107	43	NA	NA	NA	NA	NA	NA
HyS0015.60	6.06e-256	0.882972	0.435	0.033	1.33e-251	I-Cells	7	ISC/germ	DNA primase	NA	DNA primase activity	DNA replication, synthesis of RNA primer	alpha DNA polymerase:primase complex	XP_012560616.1 PREDICTED: DNA primase small subunit-like [Hydra vulgaris]	3.7e-158	OG0003930	55	47	NA	NA	NA	NA	NA	NA
HyS0015.75	0	1.11497	0.504	0.016	0	I-Cells	7	ISC/germ	Protein kinase domain-containing protein	NA	eukaryotic translation initiation factor 2alpha kinase activity	regulation of translational initiation by eIF2 alpha phosphorylation	NA	XP_015283994.1 PREDICTED: testis-specific serine/threonine-protein kinase 1-like [Gekko japonicus]	3.2e-37	OG0018653	4	4	YES	YES	YES	NA	NA	NA
HyS0016.152	2.69e-263	0.825956	0.418	0.029	5.93e-259	I-Cells	7	ISC/germ	Coiled-coil domain-containing protein 61	CCDC61	neuropeptide Y receptor activity	neuropeptide signaling pathway	centrosome	XP_026514375.1 coiled-coil domain-containing protein 61 [Terrapene mexicana triunguis]	6.4e-64	OG0006363	40	38	NA	NA	NA	NA	NA	NA
HyS0016.21	2.87e-240	0.57553	0.29	0.013	6.33e-236	I-Cells	7	ISC/germ	MYC induced nuclear antigen	NA	histone demethylase activity (H3-K36 specific)	histone H3-K36 demethylation	nucleolus	XP_002157896.3 PREDICTED: bifunctional lysine-specific demethylase and histidyl-hydroxylase NO66-like [Hydra vulgaris]	4.8e-176	OG0001597	90	45	NA	NA	NA	NA	NA	NA
HyS0016.227	0	1.56155	0.657	0.045	0	I-Cells	7	ISC/germ	Sentrin-specific protease 8	ATAD5	ATP binding	DNA clamp unloading	Elg1 RFC-like complex	XP_012553674.1 PREDICTED: uncharacterized protein LOC100207471 [Hydra vulgaris]	5.4e-109	OG0002810	64	47	NA	NA	NA	NA	NA	NA
HyS0016.64	2.71e-295	1.10746	0.513	0.041	5.97e-291	I-Cells	7	ISC/germ	Ubiquitin-protein ligase	NA	ubiquitin-protein transferase activity	protein ubiquitination	integral component of endoplasmic reticulum membrane	XP_020628167.1 uncharacterized protein LOC110065378 [Orbicella faveolata]	2e-108	OG0008795	21	17	NA	NA	NA	NA	NA	NA
HyS0017.155	0	1.09746	0.521	0.033	0	I-Cells	7	ISC/germ	DEAD box ATP-dependent RNA helicase	NA	helicase activity	gene silencing by RNA	nucleus	XP_002163544.1 PREDICTED: probable ATP-dependent RNA helicase DDX43 [Hydra vulgaris]	3.7e-246	OG0000864	133	49	NA	NA	NA	NA	NA	NA
HyS0018.206	0	1.11594	0.499	0.032	0	I-Cells	7	ISC/germ	NA	NA	NA	NA	NA	XP_012560967.1 PREDICTED: hyaluronan mediated motility receptor-like [Hydra vulgaris]	1.9e-41	OG0006500	39	29	NA	NA	NA	NA	NA	NA
HyS0018.273	1.05e-208	0.603422	0.301	0.018	2.32e-204	I-Cells	7	ISC/germ	ERCC excision repair 6 like, spindle assembly checkpoint helicase	ERCC6L	DNA translocase activity	DNA duplex unwinding	condensed chromosome kinetochore	XP_012555445.1 PREDICTED: DNA excision repair protein ERCC-6-like [Hydra vulgaris]	7e-250	OG0001419	97	48	NA	NA	NA	NA	NA	NA
HyS0019.216	3.39e-256	0.759616	0.365	0.022	7.48e-252	I-Cells	7	ISC/germ	Transcription termination factor	TTF2	zinc ion binding	DNA-templated transcription, termination	cytosol	XP_012562793.1 PREDICTED: transcription termination factor 2-like [Hydra vulgaris]	3.6e-291	OG0001284	104	40	NA	NA	NA	NA	NA	NA
HyS0020.111	3.83e-222	0.788116	0.454	0.043	8.43e-218	I-Cells	7	ISC/germ	Staphylococcal nuclease domain-containing protein 1	SND1	RISC complex binding	gene silencing by RNA	RISC complex	XP_012562852.1 PREDICTED: tudor domain-containing protein 7-like, partial [Hydra vulgaris]	1.3e-103	OG0000169	419	43	NA	NA	NA	NA	NA	NA
HyS0020.261	0	1.10273	0.51	0.026	0	I-Cells	7	ISC/germ	PHD-type domain-containing protein (Fragment)	NA	metal ion binding	NA	NA	XP_002166667.1 PREDICTED: PHD finger protein 7-like [Hydra vulgaris]	1.2e-125	OG0002047	76	37	NA	NA	NA	NA	NA	NA
HyS0020.267	2.79e-300	0.943309	0.462	0.031	6.14e-296	I-Cells	7	ISC/germ	J domain-containing protein	NA	NA	NA	NA	XP_012554194.1 PREDICTED: uncharacterized protein LOC105843399 [Hydra vulgaris]	1.1e-194	OG0011837	10	8	NA	NA	NA	NA	NA	NA
HyS0020.39	0	1.1413	0.504	0.01	0	I-Cells	7	ISC/germ	NA	NA	NA	NA	NA	XP_022808314.1 meiotic recombination protein REC114-like [Stylophora pistillata]	7.7e-22	OG0005944	43	35	NA	NA	NA	NA	NA	NA
HyS0021.199	5.21e-240	0.458774	0.253	0.009	1.15e-235	I-Cells	7	ISC/germ	NA	NA	NA	NA	NA	XP_002159383.2 PREDICTED: uncharacterized protein LOC100215136 isoform X2 [Hydra vulgaris]	7.6e-35	OG0013207	8	2	YES	YES	YES	YES	YES	NA
HyS0021.211	3.12e-286	0.665133	0.348	0.017	6.86e-282	I-Cells	7	ISC/germ	Zygotic DNA replication licensing factor mcm3	MCM3	DNA helicase activity	DNA replication initiation	MCM complex	XP_012561423.1 PREDICTED: DNA replication licensing factor MCM3-like [Hydra vulgaris]	0	OG0002777	64	49	NA	NA	NA	NA	NA	NA
HyS0021.274	0	0.971371	0.429	0.01	0	I-Cells	7	ISC/germ	NA	NA	NA	NA	NA	NA	NA	OG0018739	4	4	YES	YES	YES	NA	NA	NA
HyS0022.213	0	1.03117	0.482	0.031	0	I-Cells	7	ISC/germ	Acyl-CoA-binding domain-containing protein 4	NA	NA	NA	NA	XP_022614115.1 uncharacterized protein LOC111231337 [Seriola dumerili]	1.1e-88	OG0000167	425	49	NA	NA	NA	NA	NA	NA
HyS0022.62	0	0.984934	0.482	0.033	0	I-Cells	7	ISC/germ	Epithelial cell transforming 2	ECT2	Rho guanyl-nucleotide exchange factor activity	regulation of cytokinesis, actomyosin contractile ring assembly	nucleus	XP_012563412.1 PREDICTED: protein ECT2-like [Hydra vulgaris]	2e-288	OG0000873	132	47	NA	NA	NA	NA	NA	NA
HyS0022.99	0	0.668529	0.351	0.011	0	I-Cells	7	ISC/germ	NA	NA	NA	NA	NA	XP_027036802.1 tethering factor for nuclear proteasome cut8-like [Pocillopora damicornis]	4.3e-14	OG0008895	20	16	NA	NA	NA	NA	NA	NA
HyS0024.126	1.69e-258	0.461815	0.273	0.01	3.73e-254	I-Cells	7	ISC/germ	Queuine tRNA-ribosyltransferase	QTRT1	queuine tRNA-ribosyltransferase activity	tRNA-guanine transglycosylation	mitochondrial outer membrane	XP_012566735.1 PREDICTED: queuine tRNA-ribosyltransferase-like [Hydra vulgaris]	2.6e-190	OG0003696	56	47	NA	NA	NA	NA	NA	NA
HyS0024.14	1.67e-292	0.792202	0.412	0.025	3.68e-288	I-Cells	7	ISC/germ	serine/threonine-protein kinase ATR	ATR	protein serine/threonine kinase activity	protein phosphorylation	PML body	XP_027042435.1 serine/threonine-protein kinase atr-like [Pocillopora damicornis]	0	OG0000631	168	49	NA	NA	NA	NA	NA	NA
HyS0024.32	4.97e-297	0.550582	0.318	0.012	1.1e-292	I-Cells	7	ISC/germ	Putative thyroid transcription factor 1-associated protein 26	NA	ubiquitin-protein transferase activity	protein ubiquitination	anaphase-promoting complex	XP_002162565.1 PREDICTED: anaphase-promoting complex subunit 11-like [Hydra vulgaris]	1e-17	OG0001104	116	48	NA	NA	NA	NA	NA	NA
HyS0026.189	9.65e-308	1.17186	0.565	0.048	2.13e-303	I-Cells	7	ISC/germ	Flagellar outer dynein arm-docking complex protein 1	NA	NA	outer dynein arm assembly	axoneme	XP_020624059.1 outer dynein arm protein 1-like [Orbicella faveolata]	1.2e-111	OG0001769	83	39	NA	NA	NA	NA	NA	NA
HyS0026.86	0	1.40561	0.618	0.042	0	I-Cells	7	ISC/germ	Lymphoid-specific helicase	HELLS	ATPase activity, coupled	regulation of DNA methylation	pericentric heterochromatin	XP_012561048.1 PREDICTED: lymphocyte-specific helicase [Hydra vulgaris]	1.7e-258	OG0005804	44	39	NA	NA	NA	NA	NA	NA
HyS0027.38	2.89e-285	0.949837	0.474	0.036	6.37e-281	I-Cells	7	ISC/germ	Dna repair protein rad18	NA	NA	double-strand break repair via homologous recombination	Smc5-Smc6 complex	XP_012557221.1 PREDICTED: structural maintenance of chromosomes protein 6-like [Hydra vulgaris]	3.1e-249	OG0002114	75	46	NA	NA	NA	NA	NA	NA
HyS0027.83	2.61e-206	0.594256	0.284	0.016	5.76e-202	I-Cells	7	ISC/germ	NA	NA	NA	NA	NA	XP_012554008.1 PREDICTED: MCM domain-containing protein 2-like [Hydra vulgaris]	2.8e-88	OG0005893	44	33	NA	NA	NA	NA	NA	NA
HyS0028.105	0	1.10027	0.476	0.032	0	I-Cells	7	ISC/germ	Methylenetetrahydrofolate dehydrogenase, cyclohydrolase and formyltetrahydrofolate synthetase 1	MTHFD1	methylenetetrahydrofolate dehydrogenase (NADP+) activity	oxidation-reduction process	cytoplasm	XP_012557792.1 PREDICTED: C-1-tetrahydrofolate synthase, cytoplasmic-like [Hydra vulgaris]	1.4e-119	OG0000952	126	49	NA	NA	NA	NA	NA	NA
HyS0028.119	0	0.867643	0.454	0.026	0	I-Cells	7	ISC/germ	Ubiquitin carboxyl-terminal hydrolase	USP48	thiol-dependent ubiquitin-specific protease activity	protein deubiquitination	nucleoplasm	XP_019211067.1 ubiquitin carboxyl-terminal hydrolase 48 isoform X1 [Oreochromis niloticus]	3.6e-194	OG0002729	65	43	NA	NA	NA	NA	NA	NA
HyS0028.175	0	1.16642	0.588	0.046	0	I-Cells	7	ISC/germ	Polycomb group protein: Enhancer of zeste	NA	methyltransferase activity	methylation	ESC/E(Z) complex	XP_020600691.1 histone-lysine N-methyltransferase EZH2-like [Orbicella faveolata]	3.7e-190	OG0002577	67	41	NA	NA	NA	NA	NA	NA
HyS0028.192	1.72e-302	0.908686	0.437	0.027	3.78e-298	I-Cells	7	ISC/germ	Multidrug resistance protein MDR	NA	ATPase-coupled transmembrane transporter activity	transmembrane transport	integral component of membrane	XP_002154484.3 PREDICTED: multidrug resistance protein 1 [Hydra vulgaris]	0	OG0000397	235	48	NA	NA	NA	NA	NA	NA
HyS0028.59	0	1.33367	0.641	0.043	0	I-Cells	7	ISC/germ	Cation channel sperm-associated protein 3	NA	ion channel activity	ion transmembrane transport	integral component of membrane	KXJ20362.1 Cation channel sperm-associated protein 3 [Exaiptasia pallida]	1.1e-98	OG0008233	24	21	NA	NA	NA	NA	NA	NA
HyS0028.76	8.25e-293	0.596697	0.281	0.008	1.82e-288	I-Cells	7	ISC/germ	WD repeat-containing protein 76	WDR76	NA	cellular response to DNA damage stimulus	NA	XP_002168337.2 PREDICTED: WD repeat-containing protein 76-like [Hydra vulgaris]	1.3e-123	OG0006064	42	35	NA	NA	NA	NA	NA	NA
HyS0029.140	9.98e-262	0.782989	0.39	0.025	2.2e-257	I-Cells	7	ISC/germ	Ribonuclease H2 subunit B	NA	RNA-DNA hybrid ribonuclease activity	RNA catabolic process	ribonuclease H2 complex	XP_022798210.1 ribonuclease H2 subunit B-like [Stylophora pistillata]	5.3e-53	OG0003535	57	45	NA	NA	NA	NA	NA	NA
HyS0029.204	0	0.691864	0.343	0.01	0	I-Cells	7	ISC/germ	NA	NA	NA	NA	NA	XP_022779926.1 uncharacterized protein LOC111321343 [Stylophora pistillata]	4.1e-68	OG0000015	1436	46	NA	NA	NA	NA	NA	NA
HyS0031.23	1.3e-301	0.749804	0.373	0.018	2.87e-297	I-Cells	7	ISC/germ	NA	NA	NA	NA	NA	XP_012555273.1 PREDICTED: uncharacterized protein LOC105843880 [Hydra vulgaris]	7.5e-81	OG0009512	17	15	YES	NA	NA	NA	NA	NA
HyS0031.56	2.96e-275	0.614653	0.281	0.009	6.53e-271	I-Cells	7	ISC/germ	Guanylate cyclase	GUCY2C	guanylate cyclase activity	cGMP biosynthetic process	plasma membrane	XP_012563130.1 PREDICTED: uncharacterized protein LOC100197588 [Hydra vulgaris]	2.3e-86	OG0012237	9	7	YES	YES	NA	NA	NA	NA
HyS0032.146	0	2.47158	0.844	0.047	0	I-Cells	7	ISC/germ	Aminolevulinate dehydratase	POLE3	protein heterodimerization activity	histone H3 acetylation	Ada2/Gcn5/Ada3 transcription activator complex	XP_012566404.1 PREDICTED: DNA polymerase epsilon subunit 3-like isoform X1 [Hydra vulgaris]	1.8e-33	OG0000693	157	48	NA	NA	NA	NA	NA	NA
HyS0032.223	0	1.2225	0.563	0.035	0	I-Cells	7	ISC/germ	Centriolin (Fragment)	NA	NA	NA	NA	XP_011516472.1 centriolin isoform X6 [Homo sapiens]	7e-37	OG0003333	59	35	NA	NA	NA	NA	NA	NA
HyS0033.207	0	1.76391	0.788	0.037	0	I-Cells	7	ISC/germ	NA	NA	NA	NA	NA	XP_012558774.1 PREDICTED: claspin-like [Hydra vulgaris]	5.8e-41	OG0005653	45	36	NA	NA	NA	NA	NA	NA
HyS0034.55	0	1.82645	0.674	0.02	0	I-Cells	7	ISC/germ	Phosphoribosylaminoimidazole carboxylase, phosphoribosylaminoimidazole succinocarboxamide synthetase	PAICS	phosphoribosylaminoimidazolesuccinocarboxamide synthase activity	'de novo' IMP biosynthetic process	cytosol	XP_012554976.1 PREDICTED: multifunctional protein ADE2-like isoform X1 [Hydra vulgaris]	6.4e-174	OG0006491	39	35	NA	NA	NA	NA	NA	NA
HyS0035.76	4.04e-213	0.961968	0.457	0.048	8.9e-209	I-Cells	7	ISC/germ	S-adenosylmethionine synthase	NA	methionine adenosyltransferase activity	S-adenosylmethionine biosynthetic process	cytosol	XP_002160067.1 PREDICTED: S-adenosylmethionine synthase isoform type-1-like [Hydra vulgaris]	9e-183	OG0001834	81	49	NA	NA	NA	NA	NA	NA
HyS0038.80	2.72e-268	0.894309	0.421	0.028	5.99e-264	I-Cells	7	ISC/germ	NA	NA	NA	NA	NA	XP_022778010.1 testis-expressed protein 11-like isoform X1 [Stylophora pistillata]	9.7e-156	OG0004485	52	37	NA	NA	NA	NA	NA	NA
HyS0040.200	6.66e-259	0.65863	0.329	0.016	1.47e-254	I-Cells	7	ISC/germ	L-threonine dehydratase biosynthetic IlvA	NA	L-threonine ammonia-lyase activity	threonine catabolic process	integral component of membrane	XP_012558473.1 PREDICTED: threo-3-hydroxyaspartate ammonia-lyase-like isoform X1 [Hydra vulgaris]	4.3e-178	OG0000462	212	49	NA	NA	NA	NA	NA	NA
HyS0041.137	2.24e-252	0.674198	0.351	0.02	4.93e-248	I-Cells	7	ISC/germ	Ribonuclease	RNASEH2A	RNA-DNA hybrid ribonuclease activity	RNA phosphodiester bond hydrolysis, endonucleolytic	ribonuclease H2 complex	XP_002166509.3 PREDICTED: ribonuclease H2 subunit A-like [Hydra vulgaris]	1.8e-108	OG0004693	51	47	NA	NA	NA	NA	NA	NA
HyS0041.138	1.17e-246	0.621352	0.304	0.014	2.58e-242	I-Cells	7	ISC/germ	NA	NA	NA	NA	NA	XP_028408018.1 uncharacterized protein LOC114530624 [Dendronephthya gigantea]	8.2e-100	OG0001977	78	14	NA	NA	NA	NA	NA	NA
HyS0041.149	0	1.91603	0.694	0.019	0	I-Cells	7	ISC/germ	NA	NA	NA	NA	NA	NA	NA	OG0031405	2	2	YES	YES	YES	YES	YES	NA
HyS0042.14	0	1.24495	0.565	0.017	0	I-Cells	7	ISC/germ	Histone RNA hairpin-binding protein (Fragment)	NA	mRNA binding	NA	NA	XP_012558633.1 PREDICTED: myb-like protein D [Hydra vulgaris]	8.3e-29	OG0005350	47	43	NA	NA	NA	NA	NA	NA
HyS0042.168	0	1.3506	0.591	0.037	0	I-Cells	7	ISC/germ	28S ribosomal protein S24,mitochondrial (Fragment)	NA	RNA binding	NA	mitochondrion	XP_004210529.1 PREDICTED: 28S ribosomal protein S24-A, mitochondrial-like [Hydra vulgaris]	3.3e-59	OG0005078	48	38	NA	NA	NA	NA	NA	NA
HyS0042.61	1.87e-218	0.526303	0.298	0.017	4.12e-214	I-Cells	7	ISC/germ	NA	NA	NA	NA	NA	XP_012559602.1 PREDICTED: probable 39S ribosomal protein L49, mitochondrial [Hydra vulgaris]	1.3e-30	OG0002188	73	39	NA	NA	NA	NA	NA	NA
HyS0042.94	0	0.95196	0.482	0.025	0	I-Cells	7	ISC/germ	Exodeoxyribonuclease ExoA	NA	class I DNA-(apurinic or apyrimidinic site) endonuclease activity	DNA repair	nucleus	AKQ00060.1 apurinic/apyrimidinic endonuclease 1 [Hydra vulgaris]	2.2e-102	OG0004394	52	44	NA	NA	NA	NA	NA	NA
HyS0043.102	2.47e-222	0.697162	0.382	0.029	5.43e-218	I-Cells	7	ISC/germ	Synaptotagmin-1	RPSK	rRNA binding	translation	ribosome	XP_002165471.2 PREDICTED: 30S ribosomal protein S11, chloroplastic-like [Hydra vulgaris]	4.3e-47	OG0004462	52	44	NA	NA	NA	NA	NA	NA
HyS0043.55	3.09e-232	0.895879	0.462	0.044	6.82e-228	I-Cells	7	ISC/germ	Melanoma associated antigen 1-like 1 (Fragment)	NA	NA	NA	NA	XP_012565204.1 PREDICTED: uncharacterized protein LOC105849375, partial [Hydra vulgaris]	7e-19	OG0005628	45	35	NA	NA	NA	NA	NA	NA
HyS0044.55	0	1.5224	0.682	0.049	0	I-Cells	7	ISC/germ	Double-strand-break repair protein rad21 homolog	RAD21	NA	sister chromatid cohesion	cohesin complex	XP_002162726.2 PREDICTED: double-strand-break repair protein rad21 homolog [Hydra vulgaris]	4.4e-89	OG0002606	66	48	NA	NA	NA	NA	NA	NA
HyS0044.85	0	0.943952	0.474	0.027	0	I-Cells	7	ISC/germ	DNA mismatch repair protein Msh6	MSH6	mismatched DNA binding	mismatch repair	MutSalpha complex	XP_028406070.1 DNA mismatch repair protein Msh6-like [Dendronephthya gigantea]	0	OG0002465	68	49	NA	NA	NA	NA	NA	NA
HyS0045.22	0	0.703122	0.323	0.011	0	I-Cells	7	ISC/germ	Chromodomain-helicase-DNA-binding protein 2	E2F3	protein dimerization activity	regulation of transcription, DNA-templated	transcription factor complex	XP_002165815.2 PREDICTED: transcription factor E2F2-like isoform X1 [Hydra vulgaris]	2e-125	OG0001075	118	48	NA	NA	NA	NA	NA	NA
HyS0045.97	0	1.25408	0.56	0.031	0	I-Cells	7	ISC/germ	NA	NA	NA	NA	NA	XP_012555616.1 PREDICTED: coiled-coil domain-containing protein 18-like [Hydra vulgaris]	1.5e-47	OG0007306	32	25	NA	NA	NA	NA	NA	NA
HyS0047.157	1.22e-243	0.615424	0.273	0.011	2.69e-239	I-Cells	7	ISC/germ	NA	NA	NA	NA	NA	ALJ33555.1 AP4 [Clytia hemisphaerica]	5.6e-49	OG0005089	48	41	NA	NA	NA	NA	NA	NA
HyS0047.63	0	1.24157	0.521	0.017	0	I-Cells	7	ISC/germ	NA	NA	NA	NA	NA	NA	NA	OG0022055	3	3	YES	YES	YES	YES	NA	NA
HyS0048.101	1.16e-288	0.985475	0.524	0.044	2.56e-284	I-Cells	7	ISC/germ	BCS1 homolog, ubiquinol-cytochrome c reductase complex chaperone	NA	ATP binding	respiratory chain complex III assembly	mitochondrion	XP_028406197.1 mitochondrial chaperone BCS1-like [Dendronephthya gigantea]	2.8e-166	OG0004566	51	46	NA	NA	NA	NA	NA	NA
HyS0048.102	1.25e-217	0.536451	0.276	0.014	2.76e-213	I-Cells	7	ISC/germ	NA	NA	NA	NA	NA	XP_002167651.1 PREDICTED: protein zwilch homolog [Hydra vulgaris]	2.9e-144	OG0005153	48	42	NA	NA	NA	NA	NA	NA
HyS0048.103	0	1.25888	0.568	0.008	0	I-Cells	7	ISC/germ	NA	NA	NA	NA	NA	XP_012559458.1 PREDICTED: uncharacterized protein LOC105845833 [Hydra vulgaris]	8.7e-07	OG0030992	2	2	YES	YES	YES	YES	YES	NA
HyS0048.9	0	1.0238	0.496	0.031	0	I-Cells	7	ISC/germ	Rho GTPase-activating protein 19	BUB3	ubiquitin binding	regulation of chromosome segregation	kinetochore	XP_012560984.1 PREDICTED: mitotic checkpoint protein BUB3-like [Hydra vulgaris]	1.2e-153	OG0001120	114	49	NA	NA	NA	NA	NA	NA
HyS0051.62	3.88e-205	0.764844	0.401	0.037	8.56e-201	I-Cells	7	ISC/germ	Calmodulin-lysine N-methyltransferase	CAMKMT	calmodulin-lysine N-methyltransferase activity	peptidyl-lysine methylation	cytoplasm	XP_002168327.2 PREDICTED: nucleoside diphosphate-linked moiety X motif 22-like [Hydra vulgaris]	4e-62	OG0006289	41	39	NA	NA	NA	NA	NA	NA
HyS0052.21	3.08e-219	0.648217	0.362	0.027	6.79e-215	I-Cells	7	ISC/germ	Elongation factor Ts, mitochondrial	NA	translation elongation factor activity	translational elongation	mitochondrion	XP_004209964.2 PREDICTED: elongation factor Ts, mitochondrial-like [Hydra vulgaris]	5e-75	OG0004130	54	45	NA	NA	NA	NA	NA	NA
HyS0052.45	1.64e-260	0.773595	0.382	0.024	3.62e-256	I-Cells	7	ISC/germ	Dynein axonemal assembly factor 5	DNAAF5	dynein intermediate chain binding	outer dynein arm assembly	integral component of nuclear inner membrane	XP_012562369.1 PREDICTED: dynein assembly factor 5, axonemal-like [Hydra vulgaris]	1.4e-239	OG0004594	51	41	NA	NA	NA	NA	NA	NA
HyS0053.50	0	1.34018	0.577	0.021	0	I-Cells	7	ISC/germ	Fidgetin protein 1	FIGNL1	ATP binding	osteoblast proliferation	perinuclear region of cytoplasm	XP_002167043.2 PREDICTED: fidgetin-like protein 1 [Hydra vulgaris]	5.8e-160	OG0001441	96	48	NA	NA	NA	NA	NA	NA
HyS0054.31	0	1.54246	0.71	0.048	0	I-Cells	7	ISC/germ	DNA replication factor Cdt1	NA	NA	NA	NA	XP_012559350.1 PREDICTED: DNA replication factor Cdt1-like isoform X2 [Hydra vulgaris]	9.9e-104	OG0005332	47	40	NA	NA	NA	NA	NA	NA
HyS0054.36	7.75e-244	0.858878	0.448	0.038	1.71e-239	I-Cells	7	ISC/germ	J domain-containing protein (Fragment)	DNAJC11	NA	cristae formation	MICOS complex	XP_020916974.1 dnaJ homolog subfamily C member 11-like [Exaiptasia pallida]	2e-151	OG0003633	56	47	NA	NA	NA	NA	NA	NA
HyS0057.8	0	0.567126	0.309	0.007	0	I-Cells	7	ISC/germ	PCNA-associated factor	PCLAF	chromatin binding	regulation of cell cycle	nucleus	XP_002163831.1 PREDICTED: PCNA-associated factor-like [Hydra vulgaris]	2.5e-09	OG0007761	28	27	NA	NA	NA	NA	NA	NA
HyS0058.102	3.53e-241	0.606668	0.301	0.015	7.79e-237	I-Cells	7	ISC/germ	NA	NA	NA	NA	NA	CEO96790.1 hypothetical protein PBRA_005394 [Plasmodiophora brassicae]	3.6e-16	OG0012401	9	9	NA	NA	NA	NA	NA	NA
HyS0059.21	0	1.42292	0.563	0.004	0	I-Cells	7	ISC/germ	RRM domain-containing protein	NA	mRNA binding	NA	NA	XP_004207589.1 PREDICTED: uncharacterized protein LOC101238376 [Hydra vulgaris]	3.9e-23	OG0018637	4	4	YES	YES	YES	NA	NA	NA
HyS0061.60	0	1.4177	0.649	0.047	0	I-Cells	7	ISC/germ	Proliferating cell nuclear antigen	PCNA	DNA polymerase processivity factor activity	regulation of DNA replication	nucleus	XP_002164838.1 PREDICTED: proliferating cell nuclear antigen-like [Hydra vulgaris]	3.8e-127	OG0004563	51	48	NA	NA	NA	NA	NA	NA
HyS0062.35	9.95e-228	0.556412	0.267	0.012	2.19e-223	I-Cells	7	ISC/germ	Endothelial transcription factor GATA-2	TBC1D31	NA	NA	centrosome	XP_012559036.1 PREDICTED: TBC1 domain family member 31-like [Hydra vulgaris]	3e-278	OG0004262	53	42	NA	NA	NA	NA	NA	NA
HyS0068.29	0	1.33189	0.529	0.015	0	I-Cells	7	ISC/germ	NA	NA	NA	NA	NA	XP_012557078.1 PREDICTED: uncharacterized protein LOC105844710 [Hydra vulgaris]	2.8e-84	OG0023433	3	2	YES	YES	YES	YES	YES	NA
HyS0071.68	0	1.02613	0.51	0.027	0	I-Cells	7	ISC/germ	NA	NA	NA	NA	NA	NA	NA	Unassigned	NA	NA	NA	NA	NA	NA	NA	NA
HyS0077.34	1.09e-214	0.982622	0.418	0.037	2.4e-210	I-Cells	7	ISC/germ	NA	NA	NA	NA	NA	XP_001628298.1 predicted protein [Nematostella vectensis]	4.7e-06	OG0008863	20	18	NA	NA	NA	NA	NA	NA
HyS0077.46	7.09e-237	0.692295	0.326	0.019	1.56e-232	I-Cells	7	ISC/germ	Putative mcm10 replication factor	NA	single-stranded DNA binding	DNA replication initiation	nucleus	RMX52798.1 hypothetical protein pdam_00012208 [Pocillopora damicornis]	7.6e-103	OG0003126	60	46	NA	NA	NA	NA	NA	NA
HyS0080.44	7.82e-236	0.583479	0.334	0.02	1.72e-231	I-Cells	7	ISC/germ	Ribosome biogenesis protein WDR12	WDR12	ribonucleoprotein complex binding	maturation of LSU-rRNA from tricistronic rRNA transcript (SSU-rRNA, 5.8S rRNA, LSU-rRNA)	preribosome, large subunit precursor	XP_002160865.1 PREDICTED: ribosome biogenesis protein wdr12-like [Hydra vulgaris]	1.8e-99	OG0004593	51	48	NA	NA	NA	NA	NA	NA
HyS0084.27	0	0.693158	0.318	0.003	0	I-Cells	7	ISC/germ	NA	NA	NA	NA	NA	NA	NA	OG0031382	2	2	YES	YES	YES	YES	YES	NA
HyS0085.18	0	1.12473	0.479	0.023	0	I-Cells	7	ISC/germ	PR domain zinc finger protein 14	NA	nucleic acid binding	regulation of transcription, DNA-templated	nucleus	RMX42241.1 hypothetical protein pdam_00011612 [Pocillopora damicornis]	4.1e-68	OG0000223	361	43	NA	NA	NA	NA	NA	NA
HyS0087.28	0	1.05678	0.482	0.016	0	I-Cells	7	ISC/germ	Indian hedgehog protein (Fragment)	NA	peptidase activity	intein-mediated protein splicing	NA	XP_012556837.1 PREDICTED: sonic hedgehog protein-like [Hydra vulgaris]	1.9e-74	OG0000900	131	40	NA	NA	NA	NA	NA	NA
HyS0087.36	0	0.934767	0.44	0.026	0	I-Cells	7	ISC/germ	IGF-II mRNA-binding protein isoform D	NA	mRNA binding	NA	NA	XP_002157937.2 PREDICTED: insulin-like growth factor 2 mRNA-binding protein 2 [Hydra vulgaris]	1.1e-168	OG0002937	62	42	NA	NA	NA	NA	NA	NA
HyS0089.26	2.8e-270	0.859818	0.451	0.035	6.16e-266	I-Cells	7	ISC/germ	NA	NA	NA	NA	NA	NA	NA	OG0016467	5	4	YES	YES	YES	NA	NA	NA
HyS0090.1	9.97e-218	0.777179	0.396	0.033	2.2e-213	I-Cells	7	ISC/germ	Condensin complex subunit	NA	DNA topoisomerase (ATP-hydrolyzing) activator activity	mitotic chromosome condensation	condensin complex	XP_012553775.1 PREDICTED: condensin complex subunit 2-like [Hydra vulgaris]	2.3e-219	OG0003778	56	44	NA	NA	NA	NA	NA	NA
HyS0090.4	0	0.850599	0.409	0.017	0	I-Cells	7	ISC/germ	Embryonic ectoderm development	EED	histone methyltransferase activity (H3-K27 specific)	histone methylation	ESC/E(Z) complex	XP_002157291.1 PREDICTED: polycomb protein eed-A-like [Hydra vulgaris]	4.2e-157	OG0002994	62	42	NA	NA	NA	NA	NA	NA
HyS0090.7	2.03e-242	0.800392	0.393	0.028	4.47e-238	I-Cells	7	ISC/germ	DNA topoisomerase 2-binding protein 1-A	NA	isomerase activity	mitotic DNA replication checkpoint	NA	XP_004210149.2 PREDICTED: DNA topoisomerase 2-binding protein 1-A-like [Hydra vulgaris]	0	OG0001019	121	47	NA	NA	NA	NA	NA	NA
HyS0091.25	7.44e-230	0.763148	0.39	0.03	1.64e-225	I-Cells	7	ISC/germ	Brix domain-containing protein 1	RPF2	rRNA binding	maturation of LSU-rRNA	nucleolus	XP_002163952.2 PREDICTED: ribosome production factor 2 homolog [Hydra vulgaris]	2.5e-124	OG0004596	51	48	NA	NA	NA	NA	NA	NA
HyS0091.37	0	0.585544	0.301	0.008	0	I-Cells	7	ISC/germ	Dynein assembly factor axonemal	DNAAF3	NA	axonemal dynein complex assembly	troponin complex	XP_022782456.1 LOW QUALITY PROTEIN: dynein assembly factor 3, axonemal-like [Stylophora pistillata]	1.7e-113	OG0005149	48	39	NA	NA	NA	NA	NA	NA
HyS0094.18	2.27e-214	0.600653	0.259	0.012	5e-210	I-Cells	7	ISC/germ	Glycoprotein 3-alpha-L-fucosyltransferase A	NA	fucosyltransferase activity	fucosylation	Golgi cisterna membrane	XP_013414341.1 glycoprotein 3-alpha-L-fucosyltransferase A-like isoform X1 [Lingula anatina]	7.3e-90	OG0000064	743	44	NA	NA	NA	NA	NA	NA
HyS0095.33	0	1.31947	0.616	0.018	0	I-Cells	7	ISC/germ	NA	NA	NA	NA	NA	XP_012565334.1 PREDICTED: non-structural maintenance of chromosomes element 1 homolog [Hydra vulgaris]	3.2e-52	OG0004815	50	44	NA	NA	NA	NA	NA	NA
HyS0096.11	0	1.98989	0.822	0.042	0	I-Cells	7	ISC/germ	NA	NA	NA	NA	NA	XP_012561908.1 PREDICTED: uncharacterized protein LOC101241833, partial [Hydra vulgaris]	1.3e-50	OG0004385	52	29	NA	NA	NA	NA	NA	NA
HyS0098.32	0	0.997769	0.465	0.014	0	I-Cells	7	ISC/germ	FA complementation group I	FANCI	DNA polymerase binding	DNA repair	nucleoplasm	XP_012561410.1 PREDICTED: Fanconi anemia group I protein homolog [Hydra vulgaris]	5.9e-281	OG0002430	69	45	NA	NA	NA	NA	NA	NA
HyS0099.18	1.62e-222	0.615825	0.331	0.021	3.58e-218	I-Cells	7	ISC/germ	Bifunctional polynucleotide phosphatase/kinase	PNKP	polynucleotide 3'-phosphatase activity	DNA 3' dephosphorylation	nucleus	XP_002168446.1 PREDICTED: bifunctional polynucleotide phosphatase/kinase-like [Hydra vulgaris]	3.9e-139	OG0001313	102	47	NA	NA	NA	NA	NA	NA
HyS0102.16	1.27e-248	0.580209	0.292	0.013	2.8e-244	I-Cells	7	ISC/germ	Valosin containing protein lysine methyltransferase	NA	methyltransferase activity	methylation	centrosome	XP_002168728.1 PREDICTED: protein-lysine methyltransferase METTL21D-like [Hydra vulgaris]	8.4e-47	OG0000638	166	47	NA	NA	NA	NA	NA	NA
HyS0102.19	0	0.614107	0.292	0.006	0	I-Cells	7	ISC/germ	Sodium potassium calcium exchanger	SLC24A5	calcium, potassium:sodium antiporter activity	cellular calcium ion homeostasis	trans-Golgi network	XP_012557787.1 PREDICTED: sodium/potassium/calcium exchanger 3-like [Hydra vulgaris]	6e-164	OG0000427	224	41	NA	NA	NA	NA	NA	NA
HyS0130.21	0	0.952248	0.482	0.031	0	I-Cells	7	ISC/germ	Poly [ADP-ribose] polymerase	PARP2	NAD+ ADP-ribosyltransferase activity	protein ADP-ribosylation	nucleolus	XP_012561061.1 PREDICTED: poly [ADP-ribose] polymerase 2-like [Hydra vulgaris]	6.8e-237	OG0000407	230	47	NA	NA	NA	NA	NA	NA
HyS0130.5	7.63e-289	0.737507	0.331	0.014	1.68e-284	I-Cells	7	ISC/germ	Cyclin N-terminal domain-containing protein (Fragment)	CCNE1	cyclin-dependent protein serine/threonine kinase regulator activity	G1/S transition of mitotic cell cycle	cyclin E1-CDK2 complex	XP_002162252.2 PREDICTED: G1/S-specific cyclin-E1-like [Hydra vulgaris]	7.1e-163	OG0000243	336	49	NA	NA	NA	NA	NA	NA
HyS0137.13	7.62e-209	0.757839	0.279	0.015	1.68e-204	I-Cells	7	ISC/germ	NA	NA	NA	NA	NA	XP_012556626.1 PREDICTED: uncharacterized protein LOC101237860 [Hydra vulgaris]	1.2e-16	OG0011210	11	9	NA	NA	NA	NA	NA	NA
HyS0164.2	1.23e-237	0.861959	0.396	0.029	2.71e-233	I-Cells	7	ISC/germ	Nipped-B protein (Fragment)	NA	chromatin binding	cell cycle	nucleus	XP_028403611.1 nipped-B-like protein isoform X1 [Dendronephthya gigantea]	0	OG0002169	73	47	NA	NA	NA	NA	NA	NA
HyS0284.6	1.45e-265	0.658298	0.334	0.017	3.19e-261	I-Cells	7	ISC/germ	Fanconi anemia group D2 protein isoform b	FANCD2	DNA polymerase binding	DNA repair	condensed chromosome	XP_028398343.1 Fanconi anemia group D2 protein-like isoform X1 [Dendronephthya gigantea]	8.5e-260	OG0002000	77	44	NA	NA	NA	NA	NA	NA
HyS0285.9	2.42e-257	0.679608	0.345	0.019	5.33e-253	I-Cells	7	ISC/germ	NA	NA	NA	NA	NA	XP_012559602.1 PREDICTED: probable 39S ribosomal protein L49, mitochondrial [Hydra vulgaris]	9.4e-20	OG0002188	73	39	NA	NA	NA	NA	NA	NA
HyS0327.4	0	1.47025	0.632	0.049	0	I-Cells	7	ISC/germ	P-loop containing nucleoside triphosphate hydrolase protein	KIF11	microtubule motor activity	microtubule-based movement	microtubule	XP_012555833.1 PREDICTED: centromere-associated protein E-like [Hydra vulgaris]	9.8e-172	OG0000070	694	49	NA	NA	NA	NA	NA	NA
HyS0409.3	0	0.988488	0.471	0.026	0	I-Cells	7	ISC/germ	NA	NA	NA	NA	NA	XP_002161940.3 PREDICTED: uncharacterized protein LOC100197717, partial [Hydra vulgaris]	2.4e-90	OG0009491	17	15	NA	NA	NA	NA	NA	NA
HyS0448.3	0	0.819215	0.29	0.005	0	I-Cells	7	ISC/germ	Acidic endochitinase	NA	polysaccharide binding	carbohydrate metabolic process	extracellular region	XP_028393958.1 uncharacterized protein LOC114518207 isoform X2 [Dendronephthya gigantea]	2.3e-75	OG0008217	25	10	NA	NA	NA	NA	NA	NA
HyS0493.1	1.66e-209	0.911614	0.451	0.046	3.66e-205	I-Cells	7	ISC/germ	Receptor-type tyrosine-protein phosphatase delta	NA	protein tyrosine phosphatase activity	peptidyl-tyrosine dephosphorylation	integral component of membrane	KXJ24024.1 Receptor-type tyrosine-protein phosphatase S [Exaiptasia pallida]	2.7e-148	OG0006429	40	11	NA	NA	NA	NA	NA	NA
HyS0886.1	1.97e-288	0.955075	0.513	0.043	4.35e-284	I-Cells	7	ISC/germ	Serine arginine repetitive matrix 1	NA	RNA binding	mRNA processing	NA	XP_004208028.2 PREDICTED: serine/arginine repetitive matrix protein 1-like isoform X1 [Hydra vulgaris]	7.4e-75	OG0004398	52	46	NA	NA	NA	NA	NA	NA
HyS1328.1	0	1.99688	0.816	0.044	0	I-Cells	7	ISC/germ	cilia- and flagella-associated protein 70	CFAP70	calcium ion binding	NA	motile cilium	XP_027060596.1 cilia- and flagella-associated protein 70-like [Pocillopora damicornis]	1.9e-269	OG0005472	46	39	NA	NA	NA	NA	NA	NA
HyS1479.3	7.69e-218	0.820346	0.318	0.02	1.69e-213	I-Cells	7	ISC/germ	Histone 1	NA	DNA binding	nucleosome assembly	nucleosome	AOF43156.1 histone H1.3 [Hydractinia echinata]	1.4e-41	OG0000168	421	45	NA	NA	NA	NA	NA	NA
HyS1513.2	9.78e-286	1.16749	0.454	0.032	2.15e-281	I-Cells	7	ISC/germ	Histone cluster 1 H1 family member c	NA	DNA binding	nucleosome assembly	nucleosome	NA	NA	OG0000168	421	45	NA	NA	NA	NA	NA	NA
HyS3103.6	1.44e-208	0.850837	0.373	0.03	3.18e-204	I-Cells	7	ISC/germ	Histone	NA	protein heterodimerization activity	nucleosome assembly	nucleosome	NA	NA	Unassigned	NA	NA	NA	NA	NA	NA	NA	NA
HyS3236.1	2.77e-249	1.05702	0.39	0.027	6.1e-245	I-Cells	7	ISC/germ	Histone H1-gamma, late	NA	DNA binding	nucleosome assembly	nucleosome	NA	NA	Unassigned	NA	NA	NA	NA	NA	NA	NA	NA
HyS4496.1	5.05e-300	0.442813	0.46	0.03	1.11e-295	I-Cells	7	ISC/germ	NA	NA	NA	NA	NA	NA	NA	OG0023436	3	2	YES	YES	YES	YES	YES	NA
HyS4526.1	1.49e-284	0.950777	0.501	0.04	3.28e-280	I-Cells	7	ISC/germ	NA	NA	NA	NA	NA	XP_012555359.1 PREDICTED: sporulation-specific protein 15-like [Hydra vulgaris]	4.5e-10	OG0008741	21	21	NA	NA	NA	NA	NA	NA
HyS4635.1	3.83e-217	0.765802	0.376	0.03	8.44e-213	I-Cells	7	ISC/germ	Putative neuroendocrine cell differentiation (Fragment)	NA	NA	NA	NA	XP_012555361.1 PREDICTED: protein BCCIP homolog [Hydra vulgaris]	6e-70	OG0003630	56	47	NA	NA	NA	NA	NA	NA
HyS4769.1	7.63e-256	0.726597	0.423	0.031	1.68e-251	I-Cells	7	ISC/germ	Cell division cycle-associated	CDCA7L	NA	positive regulation of cell population proliferation	fibrillar center	XP_004211244.1 PREDICTED: cell division cycle-associated protein 7-like [Hydra vulgaris]	6.7e-60	OG0006528	39	31	NA	NA	NA	NA	NA	NA
HyS0002.457	1.81e-288	2.94768	0.499	0.043	4e-284	Battery Cells	8	nem_3	NA	NA	NA	NA	NA	XP_018117938.1 PREDICTED: receptor-transporting protein 2-like [Xenopus laevis]	1.6e-08	OG0012415	9	3	YES	YES	YES	YES	NA	NA
HyS0003.235	7.85e-259	2.08778	0.294	0.012	1.73e-254	Battery Cells	8	nem_3	NA	NA	NA	NA	NA	PAA49736.1 hypothetical protein BOX15_Mlig030324g2 [Macrostomum lignano]	9.3e-22	OG0013042	8	5	NA	NA	NA	NA	NA	NA
HyS0007.351	0	3.20577	0.559	0.029	0	Battery Cells	8	nem_3	NA	NA	NA	NA	NA	XP_002155920.1 PREDICTED: protein FAM154A-like [Hydra vulgaris]	6.4e-37	OG0001928	79	39	NA	NA	NA	NA	NA	NA
HyS0008.10	1.14e-290	2.7026	0.484	0.038	2.52e-286	Battery Cells	8	nem_3	NA	NA	NA	NA	NA	NP_058733.1 peripheral myelin protein 22 [Rattus norvegicus]	1.3e-05	OG0016493	5	4	YES	YES	YES	NA	NA	NA
HyS0008.16	6.24e-207	2.45512	0.378	0.033	1.38e-202	Battery Cells	8	nem_3	Latent-transforming growth factor beta-binding protein 4	LTBP4	calcium ion binding	hormone secretion	extracellular matrix	XP_012565265.1 PREDICTED: uncharacterized protein LOC105849435, partial [Hydra vulgaris]	8e-156	OG0010598	13	8	YES	YES	NA	NA	NA	NA
HyS0010.135	9e-301	2.5096	0.329	0.013	1.98e-296	Battery Cells	8	nem_3	Guanylate cyclase	NA	guanylate cyclase activity	cGMP biosynthetic process	integral component of membrane	XP_012566685.1 PREDICTED: atrial natriuretic peptide receptor 1-like [Hydra vulgaris]	1.2e-162	OG0000029	1125	46	NA	NA	NA	NA	NA	NA
HyS0010.136	0	2.51729	0.36	0.014	0	Battery Cells	8	nem_3	NA	NA	NA	NA	NA	XP_012566685.1 PREDICTED: atrial natriuretic peptide receptor 1-like [Hydra vulgaris]	1.8e-29	OG0000029	1125	46	NA	NA	NA	NA	NA	NA
HyS0010.300	0	3.6169	0.686	0.029	0	Battery Cells	8	nem_3	NA	NA	NA	NA	NA	XP_022789963.1 uncharacterized protein LOC111329506 [Stylophora pistillata]	3.4e-102	OG0000083	620	22	NA	NA	NA	NA	NA	NA
HyS0010.64	0	3.17985	0.522	0.023	0	Battery Cells	8	nem_3	NA	NA	NA	NA	NA	XP_012558806.1 PREDICTED: uncharacterized protein LOC101241857 [Hydra vulgaris]	8.2e-111	OG0000083	620	22	NA	NA	NA	NA	NA	NA
HyS0012.244	0	4.24305	0.804	0.017	0	Battery Cells	8	nem_3	NA	NA	NA	NA	NA	XP_012560452.1 PREDICTED: lens fiber membrane intrinsic protein-like [Hydra vulgaris]	2.5e-08	OG0013857	7	4	YES	YES	YES	NA	NA	NA
HyS0014.34	0	3.52082	0.594	0.011	0	Battery Cells	8	nem_3	NA	NA	NA	NA	NA	NA	NA	OG0000460	212	49	NA	NA	NA	NA	NA	NA
HyS0018.109	0	3.70881	0.648	0.036	0	Battery Cells	8	nem_3	NA	NA	NA	NA	NA	XP_002155421.1 PREDICTED: uncharacterized protein LOC100206708 [Hydra vulgaris]	8e-08	OG0018756	4	4	YES	YES	YES	NA	NA	NA
HyS0020.176	0	3.26426	0.582	0.044	0	Battery Cells	8	nem_3	NA	NA	NA	NA	NA	ABS19961.1 selenoprotein W2 [Artemia franciscana]	9.3e-07	OG0006502	39	27	NA	NA	NA	NA	NA	NA
HyS0021.209	3.18e-223	2.42591	0.395	0.033	7e-219	Battery Cells	8	nem_3	Troponin T, cardiac muscle (Fragment)	NA	NA	regulation of muscle contraction	troponin complex	XP_012561396.1 PREDICTED: uncharacterized protein LOC100215940 [Hydra vulgaris]	5.1e-166	OG0002967	62	30	NA	NA	NA	NA	NA	NA
HyS0021.285	1.24e-218	2.52188	0.401	0.036	2.74e-214	Battery Cells	8	nem_3	Platelet-activating factor acetylhydrolase	PLA2G7	1-alkyl-2-acetylglycerophosphocholine esterase activity	lipid catabolic process	low-density lipoprotein particle	XP_012561396.1 PREDICTED: uncharacterized protein LOC100215940 [Hydra vulgaris]	5.6e-101	OG0002967	62	30	NA	NA	NA	NA	NA	NA
HyS0023.134	4.75e-246	2.33208	0.32	0.017	1.05e-241	Battery Cells	8	nem_3	NA	NA	NA	NA	NA	NA	NA	OG0031074	2	2	YES	YES	YES	YES	YES	NA
HyS0027.115	2.43e-241	2.72154	0.421	0.035	5.36e-237	Battery Cells	8	nem_3	NA	NA	NA	NA	NA	XP_012556171.1 PREDICTED: uncharacterized protein LOC101240025 [Hydra vulgaris]	2.5e-45	OG0010673	13	4	YES	YES	YES	NA	NA	NA
HyS0031.39	0	3.40918	0.614	0.037	0	Battery Cells	8	nem_3	NA	NA	NA	NA	NA	XP_002160639.3 PREDICTED: uncharacterized protein LOC100198382 [Hydra vulgaris]	1.3e-28	OG0001833	82	14	YES	NA	NA	NA	NA	NA
HyS0035.134	0	3.83324	0.654	0.038	0	Battery Cells	8	nem_3	Lipoxygenase homology domain-containing protein 1	NA	catalase activity	cellular oxidant detoxification	NA	XP_012555385.1 PREDICTED: protein PFC0760c-like [Hydra vulgaris]	2.9e-56	OG0000385	240	43	NA	NA	NA	NA	NA	NA
HyS0044.86	1.52e-255	2.51477	0.383	0.026	3.36e-251	Battery Cells	8	nem_3	NA	NA	NA	NA	NA	XP_012566970.1 PREDICTED: uncharacterized protein LOC100206068 [Hydra vulgaris]	3.7e-119	OG0000083	620	22	NA	NA	NA	NA	NA	NA
HyS0045.10	1.74e-240	2.56166	0.372	0.025	3.84e-236	Battery Cells	8	nem_3	Fibrinogen C-terminal domain-containing protein (Fragment)	NA	signaling receptor binding	platelet activation	extracellular space	XP_020607287.1 fibrinogen-like protein A [Orbicella faveolata]	6.3e-19	OG0000010	1871	39	NA	NA	NA	NA	NA	NA
HyS0047.11	1.4e-285	2.8983	0.501	0.043	3.07e-281	Battery Cells	8	nem_3	WD repeat-containing protein 86	WDR86	NA	NA	NA	XP_020626069.1 WD repeat-containing protein 86-like [Orbicella faveolata]	2.8e-16	OG0006635	38	32	NA	NA	NA	NA	NA	NA
HyS0061.97	0	3.71606	0.64	0.039	0	Battery Cells	8	nem_3	Vegetative incompatibility protein HET-E-1	NA	catalytic activity	nucleoside metabolic process	NA	XP_013405224.1 uncharacterized protein LOC106170042 [Lingula anatina]	4.1e-20	OG0000306	290	34	NA	NA	NA	NA	NA	NA
HyS0062.98	2.9e-218	2.57679	0.438	0.044	6.4e-214	Battery Cells	8	nem_3	NA	NA	NA	NA	NA	XP_028391985.1 calretinin-like [Dendronephthya gigantea]	5e-26	OG0001152	112	41	NA	NA	NA	NA	NA	NA
HyS0065.29	7.31e-220	2.83404	0.409	0.037	1.61e-215	Battery Cells	8	nem_3	NA	NA	NA	NA	NA	NA	NA	OG0031225	2	2	YES	YES	YES	YES	YES	NA
HyS0076.31	3.11e-227	2.05789	0.271	0.012	6.85e-223	Battery Cells	8	nem_3	NA	NA	NA	NA	NA	XP_012560655.1 PREDICTED: uncharacterized protein LOC105846444 [Hydra vulgaris]	6.5e-17	OG0009883	15	11	NA	NA	NA	NA	NA	NA
HyS0002.225	0	1.94281	0.275	0.001	0	nemBattery-like	9	nem_4	NA	NA	NA	NA	NA	XP_012565715.1 PREDICTED: uncharacterized protein LOC100214568 isoform X1 [Hydra vulgaris]	4e-22	OG0013083	8	4	YES	YES	YES	NA	NA	NA
HyS0002.228	0	2.73535	0.418	0.013	0	nemBattery-like	9	nem_4	Oxygen-regulated protein 1	NA	calcium ion binding	kidney development	integral component of membrane	XP_020609523.1 uncharacterized protein LOC110048087 [Orbicella faveolata]	7.8e-269	OG0000062	767	40	NA	NA	NA	NA	NA	NA
HyS0003.384	0	2.79613	0.592	0.007	0	nemBattery-like	9	nem_4	NA	NA	NA	NA	NA	XP_028410079.1 kelch-like protein 12 [Dendronephthya gigantea]	4.4e-51	OG0000011	1860	45	NA	NA	NA	NA	NA	NA
HyS0003.437	0	1.81792	0.356	0.001	0	nemBattery-like	9	nem_4	NA	NA	NA	NA	NA	XP_022802853.1 uncharacterized protein LOC111340296 [Stylophora pistillata]	2.8e-07	OG0006186	42	3	YES	YES	YES	YES	NA	NA
HyS0003.504	0	3.69627	0.663	0.003	0	nemBattery-like	9	nem_4	Potassium voltage-gated channel subfamily H member 8	KCNH8	voltage-gated potassium channel activity	potassium ion transmembrane transport	integral component of plasma membrane	XP_012554706.1 PREDICTED: potassium voltage-gated channel subfamily H member 1-like isoform X2 [Hydra vulgaris]	3.3e-148	OG0000314	285	45	NA	NA	NA	NA	NA	NA
HyS0004.133	0	1.42454	0.33	0.001	0	nemBattery-like	9	nem_4	NA	NA	NA	NA	NA	XP_002154502.2 PREDICTED: calmodulin-A-like [Hydra vulgaris]	1.1e-28	OG0030929	2	2	YES	YES	YES	YES	YES	NA
HyS0004.301	0	2.00719	0.288	0.001	0	nemBattery-like	9	nem_4	Guanylate cyclase	NA	guanylate cyclase activity	cGMP biosynthetic process	integral component of membrane	XP_020600813.1 atrial natriuretic peptide receptor 1-like isoform X2 [Orbicella faveolata]	3.6e-139	OG0000029	1125	46	NA	NA	NA	NA	NA	NA
HyS0004.445	0	2.16769	0.366	0.002	0	nemBattery-like	9	nem_4	Gamma-aminobutyric acid receptor subunit beta-2 (Fragment)	NA	extracellular ligand-gated ion channel activity	ion transmembrane transport	plasma membrane	XP_012560049.1 PREDICTED: gamma-aminobutyric acid receptor subunit beta-2-like isoform X1 [Hydra vulgaris]	1e-95	OG0000037	1047	39	NA	NA	NA	NA	NA	NA
HyS0005.142	0	1.86633	0.301	0.001	0	nemBattery-like	9	nem_4	Short transient receptor potential channel 2	NA	calcium channel activity	calcium ion transmembrane transport	spanning component of plasma membrane	XP_012561644.1 PREDICTED: ankyrin-3-like [Hydra vulgaris]	7.4e-69	OG0001789	83	34	NA	NA	NA	NA	NA	NA
HyS0005.219	0	3.57402	0.752	0.021	0	nemBattery-like	9	nem_4	NA	NA	NA	NA	NA	XP_012554453.1 PREDICTED: uncharacterized protein LOC100197582 isoform X1 [Hydra vulgaris]	6.2e-156	OG0000083	620	22	NA	NA	NA	NA	NA	NA
HyS0005.224	0	2.86429	0.598	0.028	0	nemBattery-like	9	nem_4	Complement factor properdin	NA	NA	nervous system development	integral component of membrane	XP_012556506.1 PREDICTED: uncharacterized protein LOC100199700 [Hydra vulgaris]	1.8e-150	OG0013876	7	3	YES	YES	YES	YES	NA	NA
HyS0006.178	0	2.34369	0.435	0.003	0	nemBattery-like	9	nem_4	Metabotropic glutamate receptor 4 (Fragment)	NA	G protein-coupled receptor activity	G protein-coupled receptor signaling pathway	plasma membrane	XP_012562521.1 PREDICTED: metabotropic glutamate receptor 3-like [Hydra vulgaris]	1.3e-194	OG0000033	1070	45	NA	NA	NA	NA	NA	NA
HyS0007.260	0	1.8331	0.297	0.004	0	nemBattery-like	9	nem_4	NA	NA	NA	NA	NA	NA	NA	OG0007506	31	3	YES	YES	YES	YES	NA	NA
HyS0008.280	0	2.26824	0.428	0.002	0	nemBattery-like	9	nem_4	NA	NA	NA	NA	NA	NA	NA	OG0016498	5	4	YES	YES	NA	NA	NA	NA
HyS0008.281	0	3.01103	0.526	0.003	0	nemBattery-like	9	nem_4	NA	NA	NA	NA	NA	NA	NA	OG0016498	5	4	YES	YES	NA	NA	NA	NA
HyS0009.142	0	2.43714	0.415	0.002	0	nemBattery-like	9	nem_4	Ammonium transporter	NA	ammonium transmembrane transporter activity	ammonium transmembrane transport	integral component of membrane	XP_022800700.1 putative ammonium transporter 3 [Stylophora pistillata]	5.9e-148	OG0000451	215	41	NA	NA	NA	NA	NA	NA
HyS0010.8	0	2.40925	0.346	0	0	nemBattery-like	9	nem_4	Ricin B-type lectin domain-containing protein	NA	NA	NA	NA	XP_012555509.1 PREDICTED: EGF-like module-containing mucin-like hormone receptor-like 4 [Hydra vulgaris]	2.2e-106	OG0008757	21	15	NA	NA	NA	NA	NA	NA
HyS0010.83	0	3.83975	0.709	0.008	0	nemBattery-like	9	nem_4	NA	NA	NA	NA	NA	XP_012554965.1 PREDICTED: uncharacterized protein LOC101238206 [Hydra vulgaris]	3.3e-212	OG0000083	620	22	NA	NA	NA	NA	NA	NA
HyS0011.291	2.72e-215	1.62833	0.314	0.017	6e-211	nemBattery-like	9	nem_4	NA	NA	NA	NA	NA	XP_012558843.1 PREDICTED: uncharacterized protein LOC105845533 [Hydra vulgaris]	1.4e-38	OG0017073	5	2	YES	YES	YES	YES	YES	NA
HyS0012.17	0	2.72711	0.431	0.007	0	nemBattery-like	9	nem_4	Cell adhesion molecule	NA	extracellular matrix binding	negative regulation of angiogenesis	extracellular space	XP_022338411.1 SCO-spondin-like isoform X1 [Crassostrea virginica]	1.9e-52	OG0031335	2	2	YES	YES	YES	YES	YES	NA
HyS0012.32	1.01e-271	1.5604	0.304	0.011	2.23e-267	nemBattery-like	9	nem_4	NA	NA	NA	NA	NA	NA	NA	OG0022037	3	3	YES	YES	YES	YES	NA	NA
HyS0012.35	0	1.82646	0.353	0.001	0	nemBattery-like	9	nem_4	Nicotinic acetylcholine receptor alpha 2 subunit	NA	extracellular ligand-gated ion channel activity	ion transmembrane transport	plasma membrane	KPP78141.1 gamma-aminobutyric acid receptor subunit rho-1-like [Scleropages formosus]	1.8e-93	OG0000037	1047	39	NA	NA	NA	NA	NA	NA
HyS0013.196	0	3.1784	0.696	0.006	0	nemBattery-like	9	nem_4	NA	NA	NA	NA	NA	XP_020903364.1 uncharacterized protein LOC110241802 [Exaiptasia pallida]	0.00058	OG0007241	33	13	YES	NA	NA	NA	NA	NA
HyS0016.247	0	3.5479	0.585	0.018	0	nemBattery-like	9	nem_4	NA	NA	NA	NA	NA	XP_012564831.1 PREDICTED: polycystic kidney disease protein 1-like 2 [Hydra vulgaris]	2.3e-08	OG0000062	767	40	NA	NA	NA	NA	NA	NA
HyS0016.250	0	2.50984	0.31	0.004	0	nemBattery-like	9	nem_4	NA	NA	NA	NA	NA	XP_012560253.1 PREDICTED: polycystic kidney disease protein 1-like 2 [Hydra vulgaris]	4.5e-195	OG0000062	767	40	NA	NA	NA	NA	NA	NA
HyS0017.137	0	3.85493	0.742	0.038	0	nemBattery-like	9	nem_4	NA	NA	NA	NA	NA	XP_004208152.2 PREDICTED: uncharacterized protein LOC101236414 [Hydra vulgaris]	5.3e-148	OG0002023	77	15	NA	NA	NA	NA	NA	NA
HyS0017.19	0	1.52095	0.307	0.002	0	nemBattery-like	9	nem_4	Glycoprotein 3-alpha-L-fucosyltransferase A	FUCTA	fucosyltransferase activity	fucosylation	Golgi cisterna membrane	XP_013414341.1 glycoprotein 3-alpha-L-fucosyltransferase A-like isoform X1 [Lingula anatina]	4.3e-89	OG0000064	743	44	NA	NA	NA	NA	NA	NA
HyS0018.330	0	3.8769	0.781	0.004	0	nemBattery-like	9	nem_4	NA	NA	NA	NA	NA	NA	NA	OG0017067	5	2	YES	YES	YES	YES	YES	NA
HyS0020.159	0	3.94063	0.765	0.006	0	nemBattery-like	9	nem_4	Tubulin alpha chain	NA	structural constituent of cytoskeleton	microtubule-based process	microtubule	XP_006824695.1 PREDICTED: tubulin alpha-1A chain-like isoform X1 [Saccoglossus kowalevskii]	2.6e-250	OG0000147	467	49	NA	NA	NA	NA	NA	NA
HyS0020.246	0	3.19344	0.703	0.018	0	nemBattery-like	9	nem_4	Calcium-activated potassium channel	KCNMA1	large conductance calcium-activated potassium channel activity	potassium ion transmembrane transport	striated muscle dense body	XP_012564283.1 PREDICTED: calcium-activated potassium channel subunit alpha-1-like [Hydra vulgaris]	0	OG0001129	113	42	NA	NA	NA	NA	NA	NA
HyS0022.210	0	1.62904	0.297	0.005	0	nemBattery-like	9	nem_4	Two pore domain potassium channel family protein	NA	NA	NA	integral component of membrane	XP_018014906.1 PREDICTED: two pore potassium channel protein sup-9-like [Hyalella azteca]	3.8e-15	OG0000057	787	47	NA	NA	NA	NA	NA	NA
HyS0029.143	0	1.44909	0.255	0.002	0	nemBattery-like	9	nem_4	NA	NA	NA	NA	NA	XP_002167264.2 PREDICTED: arachidonate 5-lipoxygenase-like [Hydra vulgaris]	4.9e-146	OG0006186	42	3	YES	YES	YES	YES	NA	NA
HyS0029.56	0	3.21282	0.748	0.006	0	nemBattery-like	9	nem_4	NA	NA	NA	NA	NA	XP_012562296.1 PREDICTED: uncharacterized protein LOC105847335 [Hydra vulgaris]	0.00031	OG0000351	260	20	NA	NA	NA	NA	NA	NA
HyS0030.41	0	2.38315	0.399	0.005	0	nemBattery-like	9	nem_4	Zonadhesin	NA	chitin binding	chitin metabolic process	extracellular region	XP_012559251.1 PREDICTED: uncharacterized protein LOC100211324 [Hydra vulgaris]	5e-146	OG0000083	620	22	NA	NA	NA	NA	NA	NA
HyS0030.42	0	2.37439	0.451	0.003	0	nemBattery-like	9	nem_4	Chitin-binding type-2 domain-containing protein	NA	extracellular matrix binding	nervous system development	extracellular region	XP_012554415.1 PREDICTED: uncharacterized protein LOC100202641 [Hydra vulgaris]	4.9e-97	OG0000083	620	22	NA	NA	NA	NA	NA	NA
HyS0033.130	0	1.51268	0.271	0.002	0	nemBattery-like	9	nem_4	Calcium-binding protein 2	NA	calcium ion binding	NA	Golgi apparatus	XP_017222031.1 PREDICTED: probable calcium-binding protein CML25 [Daucus carota subsp. sativus]	2.2e-05	OG0018725	4	3	YES	YES	YES	YES	NA	NA
HyS0035.47	0	3.00005	0.552	0.003	0	nemBattery-like	9	nem_4	NA	NA	NA	NA	NA	NA	NA	OG0010668	13	3	YES	YES	YES	YES	NA	NA
HyS0040.104	0	3.86303	0.654	0.018	0	nemBattery-like	9	nem_4	Polycystin-1	NA	calcium ion binding	detection of mechanical stimulus	integral component of membrane	XP_012559212.1 PREDICTED: uncharacterized protein LOC100206152 [Hydra vulgaris]	0	OG0000062	767	40	NA	NA	NA	NA	NA	NA
HyS0046.127	0	2.27295	0.451	0.01	0	nemBattery-like	9	nem_4	Membrance occupation and recognition nexus protein 1	NA	kinase activity	phosphorylation	integral component of membrane	XP_012559422.1 PREDICTED: MORN repeat-containing protein 4-like [Hydra vulgaris]	4.8e-15	OG0007097	34	28	NA	NA	NA	NA	NA	NA
HyS0052.110	3.41e-278	1.85222	0.337	0.014	7.52e-274	nemBattery-like	9	nem_4	Gamma-aminobutyric acid type A receptor rho3 subunit (gene/pseudogene)	NA	ion channel activity	ion transmembrane transport	integral component of membrane	XP_012563985.1 PREDICTED: glycine receptor subunit alpha-2-like [Hydra vulgaris]	3.3e-79	OG0000037	1047	39	NA	NA	NA	NA	NA	NA
HyS0052.126	0	2.90919	0.474	0.001	0	nemBattery-like	9	nem_4	NA	NA	NA	NA	NA	PFX29236.1 Protein sidekick-2 [Stylophora pistillata]	3.2e-134	OG0000083	620	22	NA	NA	NA	NA	NA	NA
HyS0058.117	0	1.9016	0.343	0.003	0	nemBattery-like	9	nem_4	Fibroleukin	NA	NA	NA	NA	XP_019545318.1 PREDICTED: ficolin-2-like [Aedes albopictus]	3.4e-13	OG0008041	26	11	NA	NA	NA	NA	NA	NA
HyS0058.31	0	2.39686	0.376	0.006	0	nemBattery-like	9	nem_4	NA	NA	NA	NA	NA	XP_012561773.1 PREDICTED: epithelial membrane protein 1-like [Hydra vulgaris]	4.3e-08	OG0018740	4	3	YES	YES	YES	YES	NA	NA
HyS0062.8	0	3.40004	0.663	0.01	0	nemBattery-like	9	nem_4	Potassium voltage-gated channel protein Shaker	NA	ligand-gated ion channel activity	ion transmembrane transport	integral component of membrane	XP_028409023.1 uncharacterized protein LOC114531609 [Dendronephthya gigantea]	2.4e-37	OG0000083	620	22	NA	NA	NA	NA	NA	NA
HyS0076.19	0	1.67469	0.333	0.003	0	nemBattery-like	9	nem_4	Ca2+-dependent activator protein for secretion b (Fragment)	NA	NA	dense core granule exocytosis	presynapse	XP_012554118.1 PREDICTED: calcium-dependent secretion activator 1-like [Hydra vulgaris]	1e-181	OG0002627	66	42	NA	NA	NA	NA	NA	NA
HyS0076.32	0	2.49578	0.451	0.003	0	nemBattery-like	9	nem_4	NA	NA	NA	NA	NA	XP_012560655.1 PREDICTED: uncharacterized protein LOC105846444 [Hydra vulgaris]	2.7e-23	OG0019669	4	3	YES	YES	YES	NA	NA	NA
HyS0078.73	0	3.32078	0.641	0.023	0	nemBattery-like	9	nem_4	NA	NA	NA	NA	NA	XP_012555614.1 PREDICTED: uncharacterized protein LOC105844041 [Hydra vulgaris]	9.1e-33	OG0001163	112	19	NA	NA	NA	NA	NA	NA
HyS0084.54	0	3.77453	0.804	0.008	0	nemBattery-like	9	nem_4	NA	NA	NA	NA	NA	NA	NA	OG0031387	2	2	YES	YES	YES	YES	YES	NA
HyS0085.28	0	5.39246	0.775	0.028	0	nemBattery-like	9	nem_4	NA	NA	NA	NA	NA	NA	NA	Unassigned	NA	NA	NA	NA	NA	NA	NA	NA
HyS0093.23	0	2.42025	0.412	0.007	0	nemBattery-like	9	nem_4	Aquaporin FA-CHIP	NA	channel activity	transmembrane transport	integral component of membrane	XP_008294131.1 PREDICTED: aquaporin-4-like [Stegastes partitus]	7.7e-50	OG0000302	293	45	NA	NA	NA	NA	NA	NA
HyS0105.14	2.78e-247	3.13387	0.389	0.024	6.12e-243	nemBattery-like	9	nem_4	Fibrinogen C-terminal domain-containing protein	ANGPT1	receptor tyrosine kinase binding	Tie signaling pathway	NA	XP_022096327.1 ficolin-3-like [Acanthaster planci]	3.2e-21	OG0000010	1871	39	NA	NA	NA	NA	NA	NA
HyS0146.2	7.35e-209	1.279	0.317	0.018	1.62e-204	nemBattery-like	9	nem_4	Usher syndrome 1Ga (autosomal recessive)	NA	NA	equilibrioception	NA	XP_020611382.1 Usher syndrome type-1G protein homolog [Orbicella faveolata]	2.6e-21	OG0006406	40	33	NA	NA	NA	NA	NA	NA
HyS0153.8	0	3.95541	0.745	0.006	0	nemBattery-like	9	nem_4	Tubulin alpha chain	NA	structural constituent of cytoskeleton	microtubule-based process	microtubule	XP_006824695.1 PREDICTED: tubulin alpha-1A chain-like isoform X1 [Saccoglossus kowalevskii]	2.6e-250	OG0000147	467	49	NA	NA	NA	NA	NA	NA
HyS0001.296	0	1.89807	0.829	0.044	0	Nematoblasts	10	nb_1	NA	NA	NA	NA	NA	XP_012561092.1 PREDICTED: uncharacterized protein LOC101240922 [Hydra vulgaris]	4.3e-08	OG0014598	6	6	YES	YES	NA	NA	NA	NA
HyS0002.242	0	1.89129	0.62	0.015	0	Nematoblasts	10	nb_1	Transmembrane prolyl 4-hydroxylase	P4HTM	L-ascorbic acid binding	peptidyl-proline hydroxylation to 4-hydroxy-L-proline	endoplasmic reticulum	XP_002154534.3 PREDICTED: transmembrane prolyl 4-hydroxylase-like [Hydra vulgaris]	2.1e-149	OG0000518	195	26	NA	NA	NA	NA	NA	NA
HyS0002.246	0	1.4254	0.466	0.005	0	Nematoblasts	10	nb_1	Nuclear cap-binding protein subunit 1	MLT-7	peroxidase activity	response to oxidative stress	extracellular region part	XP_022800640.1 peroxidasin homolog isoform X3 [Stylophora pistillata]	1.2e-127	OG0000151	449	43	NA	NA	NA	NA	NA	NA
HyS0002.250	3.44e-281	1.13811	0.442	0.027	7.58e-277	Nematoblasts	10	nb_1	DNA polymerase III subunit epsilon	DNAQ	exonuclease activity	DNA replication	NA	XP_012563959.1 PREDICTED: uncharacterized protein LOC105848400, partial [Hydra vulgaris]	1.2e-40	OG0009742	16	11	NA	NA	NA	NA	NA	NA
HyS0002.281	0	2.35556	0.887	0.044	0	Nematoblasts	10	nb_1	C-terminal tandem repeated domain in type 4 procollagen	NA	extracellular matrix structural constituent	collagen-activated tyrosine kinase receptor signaling pathway	collagen trimer	XP_012553474.1 PREDICTED: nematogalectin isoform X1 [Hydra vulgaris]	1.1e-93	OG0001542	92	17	NA	NA	NA	NA	NA	NA
HyS0002.30	0	3.38734	0.901	0.047	0	Nematoblasts	10	nb_1	Transmembrane prolyl 4-hydroxylase	P4HTM	L-ascorbic acid binding	peptidyl-proline hydroxylation to 4-hydroxy-L-proline	endoplasmic reticulum	XP_002160414.2 PREDICTED: transmembrane prolyl 4-hydroxylase-like [Hydra vulgaris]	1.6e-183	OG0000518	195	26	NA	NA	NA	NA	NA	NA
HyS0002.319	0	2.92337	0.884	0.048	0	Nematoblasts	10	nb_1	FKBP-type peptidyl-prolyl cis-trans isomerase FklB	NA	peptidyl-prolyl cis-trans isomerase activity	protein peptidyl-prolyl isomerization	sarcoplasmic reticulum	XP_004207064.1 PREDICTED: peptidyl-prolyl cis-trans isomerase FKBP9-like [Hydra vulgaris]	2.7e-89	OG0010071	15	10	NA	NA	NA	NA	NA	NA
HyS0003.85	0	2.68515	0.873	0.028	0	Nematoblasts	10	nb_1	NA	NA	NA	NA	NA	XP_012559107.1 PREDICTED: uncharacterized protein LOC101240441 [Hydra vulgaris]	5e-59	OG0010517	13	12	YES	NA	NA	NA	NA	NA
HyS0004.107	0	1.39924	0.473	0.014	0	Nematoblasts	10	nb_1	Myb transcription factor	NA	NA	NA	NA	XP_002162809.2 PREDICTED: uncharacterized protein LOC100211529 [Hydra vulgaris]	1.9e-140	OG0007245	33	13	NA	NA	NA	NA	NA	NA
HyS0004.369	0	3.30023	0.966	0.036	0	Nematoblasts	10	nb_1	TNF receptor associated factor 4	NA	structural constituent of cuticle	NA	collagen trimer	NA	NA	OG0022067	3	3	YES	YES	YES	YES	NA	NA
HyS0004.75	0	1.64373	0.634	0.013	0	Nematoblasts	10	nb_1	Macrophage receptor with collagenous structure	NA	structural constituent of cuticle	endothelial cell morphogenesis	collagen trimer	NA	NA	OG0030922	2	2	YES	YES	YES	YES	YES	NA
HyS0005.406	0	1.94732	0.812	0.044	0	Nematoblasts	10	nb_1	Deleted in malignant brain tumors 1 protein	NA	wide pore channel activity	transmembrane transport	integral component of membrane	XP_012560641.1 PREDICTED: uncharacterized protein LOC100213236 [Hydra vulgaris]	7.1e-174	OG0000490	201	26	NA	NA	NA	NA	NA	NA
HyS0005.469	0	1.66716	0.62	0.031	0	Nematoblasts	10	nb_1	Transcription factor SOXC	NA	DNA binding	cell differentiation	nucleus	APW77282.1 SoxC1 [Hydractinia echinata]	2.1e-180	OG0000080	630	46	NA	NA	NA	NA	NA	NA
HyS0007.361	0	1.86126	0.695	0.024	0	Nematoblasts	10	nb_1	Transposable element P transposase	NA	transposase activity	transposition, DNA-mediated	NA	XP_012561620.1 PREDICTED: uncharacterized protein LOC105846954 [Hydra vulgaris]	3.4e-177	OG0000749	148	23	NA	NA	NA	NA	NA	NA
HyS0008.154	1.62e-285	0.936959	0.312	0.01	3.58e-281	Nematoblasts	10	nb_1	ADP-ribosyl cyclase/cyclic ADP-ribose hydrolase	NA	NAD+ nucleosidase activity	NA	NA	XP_002166775.2 PREDICTED: ADP-ribosyl cyclase/cyclic ADP-ribose hydrolase-like isoform X1 [Hydra vulgaris]	2.2e-103	OG0001522	92	32	NA	NA	NA	NA	NA	NA
HyS0008.33	0	2.62	0.822	0.022	0	Nematoblasts	10	nb_1	Polypeptide N-acetylgalactosaminyltransferase	NA	carbohydrate binding	protein glycosylation	Golgi membrane	XP_012554205.1 PREDICTED: polypeptide N-acetylgalactosaminyltransferase 13-like [Hydra vulgaris]	6e-205	OG0000102	571	46	NA	NA	NA	NA	NA	NA
HyS0009.106	0	0.972797	0.346	0.01	0	Nematoblasts	10	nb_1	NA	NA	NA	NA	NA	XP_002160554.2 PREDICTED: uncharacterized protein LOC100200441 [Hydra vulgaris]	4.9e-05	OG0018724	4	4	YES	YES	YES	NA	NA	NA
HyS0010.256	0	2.19391	0.705	0.029	0	Nematoblasts	10	nb_1	Cyclic AMP-responsive element-binding protein 3	CREB3L1	cAMP response element binding	endoplasmic reticulum unfolded protein response	nucleus	XP_002160519.2 PREDICTED: uncharacterized protein LOC100207904 isoform X1 [Hydra vulgaris]	1.1e-129	OG0001022	121	46	NA	NA	NA	NA	NA	NA
HyS0010.259	0	2.06823	0.788	0.047	0	Nematoblasts	10	nb_1	NA	NA	NA	NA	NA	NP_001347190.1 dickkopf-related protein 3 isoform c precursor [Mus musculus]	6.6e-07	OG0012099	9	9	YES	NA	NA	NA	NA	NA
HyS0010.263	0	1.6367	0.747	0.045	0	Nematoblasts	10	nb_1	Cuticle Protein Unclassified 6	NA	helicase activity	NA	vacuole	NP_001267790.1 nematoblast specific protein [Hydra vulgaris]	1.3e-24	OG0012787	8	8	YES	YES	NA	NA	NA	NA
HyS0011.105	0	0.802128	0.288	0.006	0	Nematoblasts	10	nb_1	Proto-oncogene serine/threonine-protein kinase mos	NA	protein serine/threonine kinase activity	protein phosphorylation	cytoplasm	XP_004209764.1 PREDICTED: serine/threonine-protein kinase mos-like [Hydra vulgaris]	2.7e-127	OG0001426	97	41	NA	NA	NA	NA	NA	NA
HyS0012.103	0	2.64934	0.825	0.04	0	Nematoblasts	10	nb_1	NA	NA	NA	NA	NA	XP_004211257.2 PREDICTED: uncharacterized protein LOC101235976 isoform X1 [Hydra vulgaris]	1.4e-145	OG0013191	8	3	YES	YES	YES	NA	NA	NA
HyS0013.223	0	3.14316	0.712	0.018	0	Nematoblasts	10	nb_1	PUM-HD domain-containing protein	NA	ubiquitin protein ligase activity	protein ubiquitination	integral component of membrane	XP_012555705.1 PREDICTED: uncharacterized protein LOC100202739 isoform X1 [Hydra vulgaris]	4.7e-146	OG0008312	24	12	YES	NA	NA	NA	NA	NA
HyS0013.224	0	3.75508	0.901	0.028	0	Nematoblasts	10	nb_1	Membrane peptidoglycan carboxypeptidase	NA	connexin binding	positive regulation of Golgi to plasma membrane protein transport	trans-Golgi network	XP_012555705.1 PREDICTED: uncharacterized protein LOC100202739 isoform X1 [Hydra vulgaris]	0	OG0008312	24	12	YES	NA	NA	NA	NA	NA
HyS0013.324	0	2.50496	0.771	0.024	0	Nematoblasts	10	nb_1	max-binding protein MNT	NA	structural constituent of cell wall	regulation of cell cycle	extracellular region	XP_012556370.1 PREDICTED: uncharacterized protein LOC100198409 isoform X3 [Hydra vulgaris]	1.6e-295	OG0000149	455	39	NA	NA	NA	NA	NA	NA
HyS0016.20	0	2.52296	0.873	0.045	0	Nematoblasts	10	nb_1	Multiple coagulation factor deficiency protein 2 (inferred by orthology to a human protein)	NA	calcium ion binding	multicellular organism reproduction	extracellular space	XP_002157985.1 PREDICTED: multiple coagulation factor deficiency protein 2 homolog [Hydra vulgaris]	1.7e-34	OG0001077	118	42	NA	NA	NA	NA	NA	NA
HyS0017.312	0	1.19991	0.404	0.005	0	Nematoblasts	10	nb_1	NA	NA	NA	NA	NA	XP_012563175.1 PREDICTED: uncharacterized protein LOC100201986 [Hydra vulgaris]	0	OG0008603	22	15	YES	NA	NA	NA	NA	NA
HyS0017.35	0	3.17171	0.942	0.04	0	Nematoblasts	10	nb_1	Efflux transporter periplasmic adaptor subunit	NA	protein serine/threonine kinase activity	neuropeptide signaling pathway	integral component of membrane	NA	NA	OG0008294	24	15	YES	NA	NA	NA	NA	NA
HyS0018.170	0	2.3677	0.726	0.012	0	Nematoblasts	10	nb_1	NA	NA	NA	NA	NA	XP_002158869.1 PREDICTED: melanopsin-like [Hydra vulgaris]	6.7e-93	OG0009966	15	14	YES	NA	NA	NA	NA	NA
HyS0018.258	0	1.77521	0.682	0.048	0	Nematoblasts	10	nb_1	NA	NA	NA	NA	NA	XP_002162417.1 PREDICTED: uncharacterized protein LOC100212358 [Hydra vulgaris]	2e-60	OG0010519	13	13	YES	NA	NA	NA	NA	NA
HyS0019.114	0	1.30271	0.555	0.031	0	Nematoblasts	10	nb_1	Transmembrane prolyl 4-hydroxylase	P4HTM	L-ascorbic acid binding	peptidyl-proline hydroxylation to 4-hydroxy-L-proline	endoplasmic reticulum	XP_020619563.1 transmembrane prolyl 4-hydroxylase-like [Orbicella faveolata]	3.3e-100	OG0000518	195	26	NA	NA	NA	NA	NA	NA
HyS0020.13	3.47e-221	0.914278	0.346	0.02	7.65e-217	Nematoblasts	10	nb_1	NA	NA	NA	NA	NA	XP_002165773.2 PREDICTED: spindle assembly checkpoint component MAD1-like [Hydra vulgaris]	8.4e-23	OG0009516	17	15	YES	NA	NA	NA	NA	NA
HyS0020.141	0	1.80087	0.658	0.026	0	Nematoblasts	10	nb_1	Small nuclear ribonucleoprotein U5 subunit 40	SNRNP40	NA	RNA splicing	U2-type catalytic step 2 spliceosome	XP_012558462.1 PREDICTED: U5 small nuclear ribonucleoprotein 40 kDa protein-like [Hydra vulgaris]	1e-112	OG0004301	53	46	NA	NA	NA	NA	NA	NA
HyS0020.163	1.87e-282	1.09725	0.37	0.017	4.12e-278	Nematoblasts	10	nb_1	Homeodomain transcription factor PaxA	NA	DNA binding	multicellular organism development	nucleus	BAA36344.2 pox neuro [Hydra vulgaris]	1.8e-161	OG0000371	247	42	NA	NA	NA	NA	NA	NA
HyS0021.234	0	2.78932	0.901	0.04	0	Nematoblasts	10	nb_1	Fibropellin-1	NA	calcium ion binding	Notch signaling pathway	integral component of membrane	XP_020626709.1 fibropellin-1-like [Orbicella faveolata]	7e-12	OG0000023	1217	47	NA	NA	NA	NA	NA	NA
HyS0021.277	0	2.14923	0.818	0.041	0	Nematoblasts	10	nb_1	Prolyl 4-hydroxylase subunit alpha-1	NA	procollagen-proline 4-dioxygenase activity	peptidyl-proline hydroxylation	endoplasmic reticulum	XP_012554360.1 PREDICTED: prolyl 4-hydroxylase subunit alpha-1-like [Hydra vulgaris]	3.9e-185	OG0000346	265	47	NA	NA	NA	NA	NA	NA
HyS0023.61	3.05e-266	1.28697	0.527	0.044	6.72e-262	Nematoblasts	10	nb_1	RNA-binding protein Musashi	NA	RNA binding	NA	polysome	XP_012557413.1 PREDICTED: RNA-binding protein Musashi homolog 2-like isoform X1 [Hydra vulgaris]	4.3e-121	OG0000063	748	49	NA	NA	NA	NA	NA	NA
HyS0026.200	0	1.24118	0.514	0.024	0	Nematoblasts	10	nb_1	Transmembrane prolyl 4-hydroxylase	NA	calcium ion binding	peptidyl-proline hydroxylation to 4-hydroxy-L-proline	endoplasmic reticulum	XP_002156288.1 PREDICTED: transmembrane prolyl 4-hydroxylase-like [Hydra vulgaris]	1.9e-206	OG0009058	19	13	YES	NA	NA	NA	NA	NA
HyS0028.153	0	3.73284	0.952	0.029	0	Nematoblasts	10	nb_1	Unc-5 netrin receptor A	UNC5A	netrin receptor activity	netrin-activated signaling pathway	integral component of membrane	XP_012558595.1 PREDICTED: SCO-spondin-like, partial [Hydra vulgaris]	0	OG0000024	1202	47	NA	NA	NA	NA	NA	NA
HyS0030.192	0	2.13219	0.798	0.03	0	Nematoblasts	10	nb_1	Tubulin beta chain	NA	structural constituent of cytoskeleton	microtubule-based process	microtubule	XP_016138200.1 PREDICTED: tubulin beta-5 chain-like [Sinocyclocheilus grahami]	1.4e-28	OG0000271	314	49	NA	NA	NA	NA	NA	NA
HyS0032.33	0	0.855547	0.329	0.01	0	Nematoblasts	10	nb_1	NA	NA	NA	NA	NA	NA	NA	OG0023366	3	3	YES	YES	YES	NA	NA	NA
HyS0033.212	0	3.0004	0.973	0.043	0	Nematoblasts	10	nb_1	NA	NA	NA	NA	NA	NA	NA	OG0030651	2	2	YES	YES	YES	YES	YES	NA
HyS0035.120	0	4.1329	0.99	0.047	0	Nematoblasts	10	nb_1	Epididymal secretory glutathione peroxidase	GPX1	glutathione peroxidase activity	response to oxidative stress	Lewy body	XP_002164274.2 PREDICTED: glutathione peroxidase 2-like [Hydra vulgaris]	2.8e-46	OG0000411	228	48	NA	NA	NA	NA	NA	NA
HyS0039.16	0	2.28988	0.853	0.045	0	Nematoblasts	10	nb_1	Rhamnose-binding lectin	NA	carbohydrate binding	NA	integral component of membrane	XP_012558885.1 PREDICTED: uncharacterized protein LOC100205211 [Hydra vulgaris]	2.1e-126	OG0008447	23	15	YES	NA	NA	NA	NA	NA
HyS0042.63	0	3.48185	0.962	0.046	0	Nematoblasts	10	nb_1	NA	NA	NA	NA	NA	XP_012557003.1 PREDICTED: J domain-containing protein DDB_G0295729-like isoform X2 [Hydra vulgaris]	3.2e-23	OG0011287	11	8	YES	YES	NA	NA	NA	NA
HyS0047.79	0	4.99965	0.976	0.022	0	Nematoblasts	10	nb_1	NA	NA	NA	NA	NA	NA	NA	OG0019611	4	3	YES	YES	YES	NA	NA	NA
HyS0049.139	0	1.11096	0.425	0.006	0	Nematoblasts	10	nb_1	NA	NA	NA	NA	NA	XP_015759003.1 PREDICTED: uncharacterized protein LOC107338287 [Acropora digitifera]	2.8e-46	OG0007357	32	18	NA	NA	NA	NA	NA	NA
HyS0052.52	0	3.13197	0.894	0.013	0	Nematoblasts	10	nb_1	Arylsulfatase B precursor	NA	sulfuric ester hydrolase activity	positive regulation of cell cycle G2/M phase transition	motile cilium	XP_012562143.1 PREDICTED: uncharacterized threonine-rich GPI-anchored glycoprotein PJ4664.02-like [Hydra vulgaris]	0	OG0000139	476	40	NA	NA	NA	NA	NA	NA
HyS0053.14	0	1.10393	0.36	0.01	0	Nematoblasts	10	nb_1	NA	NA	NA	NA	NA	NA	NA	OG0023637	3	2	YES	YES	YES	YES	YES	NA
HyS0053.162	0	1.74032	0.61	0.024	0	Nematoblasts	10	nb_1	Brefeldin A-inhibited guanine nucleotide-exchange protein 3	ARFGEF3	ARF guanyl-nucleotide exchange factor activity	regulation of ARF protein signal transduction	transport vesicle membrane	XP_012558059.1 PREDICTED: brefeldin A-inhibited guanine nucleotide-exchange protein 3 isoform X1 [Hydra vulgaris]	0	OG0004095	54	37	NA	NA	NA	NA	NA	NA
HyS0054.59	0	2.72371	0.795	0.01	0	Nematoblasts	10	nb_1	NA	NA	NA	NA	NA	NA	NA	OG0030646	2	2	YES	YES	YES	YES	YES	NA
HyS0057.53	0	1.34041	0.466	0.006	0	Nematoblasts	10	nb_1	NA	NA	NA	NA	NA	NA	NA	OG0000143	471	36	NA	NA	NA	NA	NA	NA
HyS0059.97	0	1.60023	0.596	0.018	0	Nematoblasts	10	nb_1	NA	NA	NA	NA	NA	XP_010570565.1 PREDICTED: beta-1,3-galactosyl-O-glycosyl-glycoprotein beta-1,6-N-acetylglucosaminyltransferase 3 [Haliaeetus leucocephalus]	8.5e-45	OG0000396	235	35	NA	NA	NA	NA	NA	NA
HyS0072.12	0	1.06804	0.418	0.007	0	Nematoblasts	10	nb_1	Putative cnidarian restricted protein secreted protein	NA	NA	NA	integral component of membrane	XP_027042176.1 uncharacterized protein LOC113670265 [Pocillopora damicornis]	3.4e-144	OG0011623	10	10	YES	NA	NA	NA	NA	NA
HyS0076.36	1.52e-212	0.647731	0.253	0.01	3.35e-208	Nematoblasts	10	nb_1	NA	NA	NA	NA	NA	XP_002165793.2 PREDICTED: uncharacterized protein LOC100215655 [Hydra vulgaris]	1.4e-158	OG0009266	18	15	YES	NA	NA	NA	NA	NA
HyS0098.37	0	3.05178	0.942	0.048	0	Nematoblasts	10	nb_1	GPI-anchored micronemal antigen	NA	NA	phosphatidylserine metabolic process	integral component of membrane	XP_012563990.1 PREDICTED: uncharacterized protein LOC100202087 [Hydra vulgaris]	1.5e-167	OG0000601	173	49	NA	NA	NA	NA	NA	NA
HyS0105.10	0	3.19286	0.942	0.04	0	Nematoblasts	10	nb_1	hepatocyte growth factor activator isoform X2	NA	calcium ion binding	Notch signaling pathway	integral component of membrane	XP_012556166.1 PREDICTED: uncharacterized protein LOC100210853 [Hydra vulgaris]	1.6e-72	OG0031191	2	2	YES	YES	YES	YES	YES	NA
HyS0109.14	0	2.48018	0.942	0.04	0	Nematoblasts	10	nb_1	Alpha-ketoglutarate decarboxylase	NA	oxoglutarate dehydrogenase (succinyl-transferring) activity	tricarboxylic acid cycle	NA	XP_012562767.1 PREDICTED: rho GTPase-activating protein gacF-like isoform X1 [Hydra vulgaris]	6e-23	OG0009688	16	14	YES	NA	NA	NA	NA	NA
HyS0113.27	0	3.15859	0.928	0.039	0	Nematoblasts	10	nb_1	Serine/threonine-protein kinase PknD	TRIM71	zinc ion binding	protein polyubiquitination	integral component of membrane	XP_002155572.2 PREDICTED: E3 ubiquitin-protein ligase TRIM71-like [Hydra vulgaris]	3e-227	OG0000009	1921	46	NA	NA	NA	NA	NA	NA
HyS0132.14	0	2.48741	0.901	0.037	0	Nematoblasts	10	nb_1	NA	NA	NA	NA	NA	XP_002154996.1 PREDICTED: uncharacterized protein LOC100211932 [Hydra vulgaris]	4.9e-09	OG0009293	18	14	YES	NA	NA	NA	NA	NA
HyS0138.17	0	2.73191	0.822	0.021	0	Nematoblasts	10	nb_1	Laccase, multicopper oxidase, benzenediol:oxygen oxidorectuctase	NA	copper ion binding	oxidation-reduction process	apoplast	XP_012555404.1 PREDICTED: laccase-1-like [Hydra vulgaris]	8.5e-296	OG0000508	197	34	NA	NA	NA	NA	NA	NA
HyS0153.5	0	1.38214	0.493	0.019	0	Nematoblasts	10	nb_1	Homeodomain transcription factor PaxA	NA	DNA binding	multicellular organism development	nucleus	BAA36344.2 pox neuro [Hydra vulgaris]	3e-161	OG0000371	247	42	NA	NA	NA	NA	NA	NA
HyS0171.5	0	3.08998	0.428	0.005	0	Nematoblasts	10	nb_1	NA	NA	NA	NA	NA	XP_021357175.1 tereporin-Ca1-like [Mizuhopecten yessoensis]	4.5e-15	OG0008237	24	6	NA	NA	NA	NA	NA	NA
HyS0284.5	9.82e-290	0.878896	0.288	0.008	2.16e-285	Nematoblasts	10	nb_1	NA	NA	NA	NA	NA	NA	NA	OG0030676	2	2	YES	YES	YES	YES	YES	NA
HyS0285.7	0	3.58125	0.973	0.042	0	Nematoblasts	10	nb_1	NA	NA	NA	NA	NA	XP_012557003.1 PREDICTED: J domain-containing protein DDB_G0295729-like isoform X2 [Hydra vulgaris]	5.9e-23	OG0011287	11	8	YES	YES	NA	NA	NA	NA
HyS0990.3	0	1.17284	0.445	0.013	0	Nematoblasts	10	nb_1	Transforming acidic coiled-coil-containing protein 2	NA	NA	mitotic spindle organization	NA	XP_002162189.2 PREDICTED: transforming acidic coiled-coil-containing protein 3-like [Hydra vulgaris]	1.2e-69	OG0002732	65	46	NA	NA	NA	NA	NA	NA
HyS0001.164	1.39e-224	1.27967	0.3	0.011	3.07e-220	Neurons	11	Neurons	Ets DNA-binding protein pokkuri	NA	sequence-specific DNA binding	regulation of transcription, DNA-templated	nucleus	XP_002161852.1 PREDICTED: uncharacterized protein LOC100212612 isoform X1 [Hydra vulgaris]	4.1e-48	OG0000089	597	44	NA	NA	NA	NA	NA	NA
HyS0001.347	0	2.15582	0.553	0.007	0	Neurons	11	Neurons	Hippocalcin like 4	HPCAL4	calcium ion binding	signal transduction	NA	XP_004206924.2 PREDICTED: neurocalcin homolog isoform X1 [Hydra vulgaris]	1.2e-72	OG0000193	394	48	NA	NA	NA	NA	NA	NA
HyS0001.380	1.58e-291	1.681	0.406	0.015	3.48e-287	Neurons	11	Neurons	NA	NA	NA	NA	NA	NA	NA	OG0030715	2	2	YES	YES	YES	YES	YES	NA
HyS0001.58	0	2.00794	0.341	0.004	0	Neurons	11	Neurons	Rho GTPase-activating protein 100F	NA	NA	NA	NA	XP_002157808.2 PREDICTED: uncharacterized protein LOC100204451 [Hydra vulgaris]	1.1e-53	OG0001588	90	45	NA	NA	NA	NA	NA	NA
HyS0002.337	0	3.66016	0.765	0.041	0	Neurons	11	Neurons	Vitamin D-dependent calcium-binding protein, avian-type	CALB1	calcium ion binding involved in regulation of postsynaptic cytosolic calcium ion concentration	calcium ion homeostasis	hippocampal mossy fiber to CA3 synapse	XP_012553528.1 PREDICTED: calbindin-32-like [Hydra vulgaris]	8.8e-76	OG0001152	112	41	NA	NA	NA	NA	NA	NA
HyS0003.393	3.6e-287	1.71177	0.507	0.028	7.94e-283	Neurons	11	Neurons	NA	NA	NA	NA	NA	XP_012553982.1 PREDICTED: uncharacterized protein LOC100205280 [Hydra vulgaris]	1.3e-25	OG0009268	18	17	NA	NA	NA	NA	NA	NA
HyS0003.41	0	2.63386	0.341	0.002	0	Neurons	11	Neurons	NA	NA	NA	NA	NA	NA	NA	OG0031201	2	2	YES	YES	YES	YES	YES	NA
HyS0004.213	0	4.01903	0.567	0.006	0	Neurons	11	Neurons	Tubulin alpha chain	NA	structural constituent of cytoskeleton	microtubule-based process	microtubule	AAQ90468.1 neural alfa2 tubulin [Paracentrotus lividus]	1.8e-251	OG0000147	467	49	NA	NA	NA	NA	NA	NA
HyS0004.354	0	1.98011	0.493	0.003	0	Neurons	11	Neurons	Otoferlin a	OTOF	calcium ion binding	synaptic vesicle exocytosis	presynapse	XP_012558970.1 PREDICTED: otoferlin-like [Hydra vulgaris]	0	OG0000344	267	44	NA	NA	NA	NA	NA	NA
HyS0004.495	0	1.00178	0.253	0.002	0	Neurons	11	Neurons	NA	NA	NA	NA	NA	NA	NA	OG0018763	4	4	YES	YES	YES	NA	NA	NA
HyS0005.298	0	1.57253	0.276	0	0	Neurons	11	Neurons	Neuronal acetylcholine receptor subunit alpha-7-like protein	NA	extracellular ligand-gated ion channel activity	regulation of membrane potential	synapse	XP_012563707.1 PREDICTED: neuronal acetylcholine receptor subunit alpha-3-like [Hydra vulgaris]	1e-114	OG0000019	1308	40	NA	NA	NA	NA	NA	NA
HyS0007.173	0	1.0677	0.276	0.003	0	Neurons	11	Neurons	Ras protein-specific guanine nucleotide-releasing factor 1	RASGRF1	Rho guanyl-nucleotide exchange factor activity	regulation of Rho protein signal transduction	growth cone	XP_020898239.1 ras-specific guanine nucleotide-releasing factor 1-like [Exaiptasia pallida]	6.7e-262	OG0002240	72	39	NA	NA	NA	NA	NA	NA
HyS0007.201	0	1.42643	0.401	0.012	0	Neurons	11	Neurons	NA	NA	NA	NA	NA	NA	NA	OG0030658	2	2	YES	YES	YES	YES	YES	NA
HyS0007.367	0	1.78035	0.415	0.011	0	Neurons	11	Neurons	NA	NA	NA	NA	NA	XP_002161571.3 PREDICTED: neural cell adhesion molecule 1-like [Hydra vulgaris]	5.3e-13	OG0001288	104	41	NA	NA	NA	NA	NA	NA
HyS0008.183	5.05e-248	1.1365	0.295	0.009	1.11e-243	Neurons	11	Neurons	UDP-GlcNAc:betaGal beta-1,3-N-acetylglucosaminyltransferase 6	NA	galactosyltransferase activity	protein glycosylation	Golgi apparatus	XP_020616192.1 beta-1,3-galactosyltransferase 5-like [Orbicella faveolata]	6.1e-59	OG0000050	911	45	NA	NA	NA	NA	NA	NA
HyS0008.264	0	2.09021	0.355	0.002	0	Neurons	11	Neurons	NA	NA	NA	NA	NA	XP_012557886.1 PREDICTED: uncharacterized protein LOC101239006 [Hydra vulgaris]	2.2e-210	OG0008456	23	17	NA	NA	NA	NA	NA	NA
HyS0010.160	0	2.17037	0.484	0.001	0	Neurons	11	Neurons	DNA damage-regulated autophagy modulator protein 1	NA	NA	NA	integral component of membrane	XP_012558090.1 PREDICTED: DNA damage-regulated autophagy modulator protein 1-like [Hydra vulgaris]	2.1e-77	OG0000589	175	40	NA	NA	NA	NA	NA	NA
HyS0010.174	1.2e-293	2.39493	0.525	0.03	2.65e-289	Neurons	11	Neurons	Phosphatidylinositol glycan anchor biosynthesis class N	PIGN	mannose-ethanolamine phosphotransferase activity	GPI anchor biosynthetic process	endoplasmic reticulum membrane	XP_027031737.1 GPI ethanolamine phosphate transferase 1 [Tachysurus fulvidraco]	1.9e-120	OG0003762	56	44	NA	NA	NA	NA	NA	NA
HyS0010.50	0	1.02022	0.276	0.002	0	Neurons	11	Neurons	NA	NA	NA	NA	NA	NA	NA	OG0016495	5	4	YES	YES	YES	NA	NA	NA
HyS0012.308	1.31e-291	1.48594	0.359	0.011	2.89e-287	Neurons	11	Neurons	SOX domain-containing protein dichaete	NA	DNA binding	male sex determination	nucleus	APW77287.1 Sox22 [Hydractinia echinata]	2.5e-156	OG0000080	630	46	NA	NA	NA	NA	NA	NA
HyS0016.100	0	1.7138	0.286	0.005	0	Neurons	11	Neurons	NA	NA	NA	NA	NA	XP_012558426.1 PREDICTED: glutamate receptor ionotropic, NMDA 1-like [Hydra vulgaris]	3.7e-77	OG0000839	137	19	NA	NA	NA	NA	NA	NA
HyS0018.322	0	1.45309	0.313	0.003	0	Neurons	11	Neurons	Potassium voltage-gated channel protein Shaker	NA	voltage-gated potassium channel activity	protein homooligomerization	voltage-gated potassium channel complex	XP_012566875.1 PREDICTED: potassium voltage-gated channel subfamily A member 7-like [Hydra vulgaris]	2.5e-144	OG0000035	1063	46	NA	NA	NA	NA	NA	NA
HyS0018.58	0	1.87967	0.3	0	0	Neurons	11	Neurons	Adhesion G-protein coupled receptor D1	NA	G protein-coupled receptor activity	cell surface receptor signaling pathway	integral component of plasma membrane	XP_009862007.2 adhesion G protein-coupled receptor L3-like [Ciona intestinalis]	7.5e-51	OG0000026	1183	45	NA	NA	NA	NA	NA	NA
HyS0019.73	6.73e-277	1.31813	0.313	0.009	1.48e-272	Neurons	11	Neurons	Phosphodiesterase	NA	3',5'-cyclic-nucleotide phosphodiesterase activity	signal transduction	plasma membrane	XP_012556304.1 PREDICTED: dual 3',5'-cyclic-AMP and -GMP phosphodiesterase 11A-like [Hydra vulgaris]	1.4e-280	OG0000328	277	46	NA	NA	NA	NA	NA	NA
HyS0020.265	0	1.28177	0.323	0.007	0	Neurons	11	Neurons	NA	NA	NA	NA	NA	NA	NA	OG0030732	2	2	YES	YES	YES	YES	YES	NA
HyS0024.181	0	1.30019	0.35	0.009	0	Neurons	11	Neurons	Voltage-dependent R-type calcium channel subunit alpha	CACNA1B	voltage-gated calcium channel activity	calcium ion transmembrane transport	voltage-gated calcium channel complex	XP_028410910.1 voltage-dependent N-type calcium channel subunit alpha-1B-like isoform X3 [Dendronephthya gigantea]	1.6e-209	OG0000292	300	45	NA	NA	NA	NA	NA	NA
HyS0025.55	7.5e-247	1.09401	0.263	0.006	1.65e-242	Neurons	11	Neurons	NA	NA	NA	NA	NA	NA	NA	OG0011694	10	8	YES	YES	NA	NA	NA	NA
HyS0025.56	0	1.07159	0.309	0.003	0	Neurons	11	Neurons	NA	NA	NA	NA	NA	XP_012556313.1 PREDICTED: uncharacterized protein LOC105844339 [Hydra vulgaris]	4e-06	OG0011694	10	8	YES	YES	NA	NA	NA	NA
HyS0025.57	0	1.89875	0.498	0.014	0	Neurons	11	Neurons	NA	NA	NA	NA	NA	XP_012556313.1 PREDICTED: uncharacterized protein LOC105844339 [Hydra vulgaris]	1.1e-48	OG0011694	10	8	YES	YES	NA	NA	NA	NA
HyS0027.52	0	1.71233	0.424	0.001	0	Neurons	11	Neurons	von Willebrand factor A domain-containing protein 5B1	NA	NA	NA	NA	PFX19950.1 von Willebrand factor A domain-containing protein 5B1 [Stylophora pistillata]	1.8e-81	OG0000593	174	43	NA	NA	NA	NA	NA	NA
HyS0028.162	5.72e-263	4.43205	0.29	0.008	1.26e-258	Neurons	11	Neurons	NA	NA	NA	NA	NA	NA	NA	OG0030754	2	2	YES	YES	YES	YES	YES	NA
HyS0029.53	2.79e-218	1.17767	0.3	0.011	6.16e-214	Neurons	11	Neurons	NA	NA	NA	NA	NA	XP_027040557.1 adhesion G protein-coupled receptor L1-like isoform X1 [Pocillopora damicornis]	7.9e-25	OG0010826	12	11	YES	NA	NA	NA	NA	NA
HyS0032.32	0	2.31341	0.548	0.003	0	Neurons	11	Neurons	Potassium voltage-gated channel protein Shaw	NA	voltage-gated potassium channel activity	protein homooligomerization	voltage-gated potassium channel complex	XP_020906973.1 potassium voltage-gated channel protein Shaw-like [Exaiptasia pallida]	5.7e-154	OG0000035	1063	46	NA	NA	NA	NA	NA	NA
HyS0032.55	0	1.58056	0.318	0.001	0	Neurons	11	Neurons	RNA-binding protein 9, isoform J	NA	RNA binding	germ cell proliferation	ribonucleoprotein complex	XP_002156791.3 PREDICTED: ELAV-like protein 3 [Hydra vulgaris]	8.8e-148	OG0001044	120	44	NA	NA	NA	NA	NA	NA
HyS0034.90	0	2.86201	0.687	0.015	0	Neurons	11	Neurons	Neurocalcin	HPCAL4	calcium channel regulator activity	signal transduction	intracellular	XP_021350872.1 neurocalcin homolog [Mizuhopecten yessoensis]	2.2e-41	OG0000193	394	48	NA	NA	NA	NA	NA	NA
HyS0035.109	0	1.19453	0.313	0.001	0	Neurons	11	Neurons	TWiK family of potassium channels protein 7	NA	potassium channel activity	potassium ion transmembrane transport	integral component of membrane	XP_020916786.1 potassium channel subfamily K member 2-like [Exaiptasia pallida]	6.3e-59	OG0000057	787	47	NA	NA	NA	NA	NA	NA
HyS0035.15	1.11e-232	1.58642	0.442	0.027	2.44e-228	Neurons	11	Neurons	S-adenosyl-L-methionine-dependent methyltransferase	NA	methyltransferase activity	lipid biosynthetic process	integral component of membrane	XP_002165145.1 PREDICTED: uncharacterized protein LOC100198707 [Hydra vulgaris]	1.6e-170	OG0008917	20	20	NA	NA	NA	NA	NA	NA
HyS0035.34	0	2.72015	0.387	0.001	0	Neurons	11	Neurons	BPTI/Kunitz inhibitor domain-containing protein	NA	serine-type endopeptidase inhibitor activity	negative regulation of endopeptidase activity	NA	XP_002156020.3 PREDICTED: uncharacterized protein LOC100198750 [Hydra vulgaris]	5.1e-118	OG0000132	496	42	NA	NA	NA	NA	NA	NA
HyS0037.46	0	2.129	0.479	0.005	0	Neurons	11	Neurons	Potassium voltage-gated channel protein Shaw	NA	voltage-gated potassium channel activity	protein homooligomerization	voltage-gated potassium channel complex	XP_015778302.1 PREDICTED: potassium voltage-gated channel subfamily C member 1-like [Acropora digitifera]	1.2e-118	OG0000035	1063	46	NA	NA	NA	NA	NA	NA
HyS0043.127	8.19e-213	1.43931	0.429	0.027	1.8e-208	Neurons	11	Neurons	NA	NA	NA	NA	NA	XP_012558013.1 PREDICTED: uncharacterized protein LOC100207093 [Hydra vulgaris]	1.2e-36	OG0012875	8	8	YES	YES	NA	NA	NA	NA
HyS0044.153	0	3.46836	0.29	0.001	0	Neurons	11	Neurons	NA	NA	NA	NA	NA	NA	NA	OG0030736	2	2	YES	YES	YES	YES	YES	NA
HyS0048.126	4.02e-282	4.90036	0.309	0.008	8.86e-278	Neurons	11	Neurons	NA	NA	NA	NA	NA	NA	NA	OG0030990	2	2	YES	YES	YES	YES	YES	NA
HyS0049.115	0	1.49978	0.332	0.004	0	Neurons	11	Neurons	Retinaldehyde-binding protein 1	NA	retinal binding	visual perception	NA	XP_002170871.1 PREDICTED: retinaldehyde-binding protein 1-like [Hydra vulgaris]	4.6e-121	OG0000355	257	39	NA	NA	NA	NA	NA	NA
HyS0049.55	0	5.12515	0.29	0.003	0	Neurons	11	Neurons	NA	NA	NA	NA	NA	NA	NA	OG0031268	2	2	YES	YES	YES	YES	YES	NA
HyS0051.139	0	4.47413	0.396	0.003	0	Neurons	11	Neurons	NA	NA	NA	NA	NA	NA	NA	OG0031043	2	2	YES	YES	YES	YES	YES	NA
HyS0052.4	0	1.37285	0.364	0.002	0	Neurons	11	Neurons	Voltage-dependent L-type calcium channel subunit alpha	NA	voltage-gated calcium channel activity	regulation of ion transmembrane transport	voltage-gated calcium channel complex	XP_028408443.1 voltage-dependent R-type calcium channel subunit alpha-1E-like [Dendronephthya gigantea]	0	OG0000292	300	45	NA	NA	NA	NA	NA	NA
HyS0056.103	0	1.96653	0.373	0.002	0	Neurons	11	Neurons	NA	NA	NA	NA	NA	NA	NA	OG0009923	15	14	YES	NA	NA	NA	NA	NA
HyS0062.54	0	3.8833	0.295	0.002	0	Neurons	11	Neurons	NA	NA	NA	NA	NA	NA	NA	OG0031082	2	2	YES	YES	YES	YES	YES	NA
HyS0065.57	0	1.80678	0.53	0.024	0	Neurons	11	Neurons	Rutabaga adenylyl cyclase	NA	adenylate cyclase activity	cyclic nucleotide biosynthetic process	plasma membrane	XP_004206359.2 PREDICTED: adenylate cyclase type 2-like [Hydra vulgaris]	2.9e-215	OG0000343	268	43	NA	NA	NA	NA	NA	NA
HyS0068.15	0	6.11157	0.894	0.019	0	Neurons	11	Neurons	Phosphoglucan, water dikinase protein, putative	NA	kinase activity	phosphorylation	NA	NA	NA	OG0031018	2	2	YES	YES	YES	YES	YES	NA
HyS0068.81	5.91e-229	2.48099	0.488	0.034	1.3e-224	Neurons	11	Neurons	Mu class glutathione S-transferase	NA	glutathione transferase activity	glutathione metabolic process	NA	ACQ58211.1 Glutathione S-transferase Mu 3 [Anoplopoma fimbria]	1.3e-69	OG0000949	127	40	NA	NA	NA	NA	NA	NA
HyS0072.14	0	1.85502	0.373	0.001	0	Neurons	11	Neurons	NA	NA	NA	NA	NA	XP_012556314.1 PREDICTED: synaptotagmin-16-like [Hydra vulgaris]	6.3e-162	OG0012819	8	8	YES	YES	NA	NA	NA	NA
HyS0078.12	0	3.75336	0.263	0.004	0	Neurons	11	Neurons	NA	NA	NA	NA	NA	NA	NA	OG0023471	3	2	YES	YES	YES	YES	YES	NA
HyS0085.53	0	3.19434	0.544	0.017	0	Neurons	11	Neurons	RNA binding protein Gbfne	NA	RNA binding	germ cell proliferation	ribonucleoprotein complex	AGR42650.1 ELAV [Hydractinia echinata]	2.8e-208	OG0001044	120	44	NA	NA	NA	NA	NA	NA
HyS0086.24	0	1.80742	0.419	0.002	0	Neurons	11	Neurons	NA	NA	NA	NA	NA	XP_002166129.1 PREDICTED: fascin-like [Hydra vulgaris]	2.5e-66	OG0004300	53	38	NA	NA	NA	NA	NA	NA
HyS0098.56	0	1.39357	0.387	0.003	0	Neurons	11	Neurons	NA	NA	NA	NA	NA	XP_002160858.1 PREDICTED: uncharacterized protein LOC100201464 [Hydra vulgaris]	2.1e-38	OG0011734	10	9	NA	NA	NA	NA	NA	NA
HyS0235.5	0	1.15968	0.276	0.001	0	Neurons	11	Neurons	Voltage-dependent L-type calcium channel subunit alpha	NA	voltage-gated calcium channel activity	regulation of ion transmembrane transport	voltage-gated calcium channel complex	XP_028408443.1 voltage-dependent R-type calcium channel subunit alpha-1E-like [Dendronephthya gigantea]	0	OG0000292	300	45	NA	NA	NA	NA	NA	NA
HyS0001.150	0	0.909381	0.327	0.005	0	Nematoblasts	12	nb_2	NA	NA	NA	NA	NA	XP_012557776.1 PREDICTED: uncharacterized protein LOC100207836 [Hydra vulgaris]	7.4e-81	OG0001753	84	19	NA	NA	NA	NA	NA	NA
HyS0001.162	0	2.05406	0.763	0.045	0	Nematoblasts	12	nb_2	Negative elongation factor complex member B	NA	translation elongation factor activity	negative regulation of transcription, DNA-templated	nucleus	XP_002167771.2 PREDICTED: negative elongation factor B-like [Hydra vulgaris]	3.3e-195	OG0004056	54	46	NA	NA	NA	NA	NA	NA
HyS0001.200	0	1.95548	0.571	0.003	0	Nematoblasts	12	nb_2	A disintegrin and metalloproteinase with thrombospondin motifs 16	NA	metalloendopeptidase activity	integrin-mediated signaling pathway	basement membrane	XP_020624510.1 A disintegrin and metalloproteinase with thrombospondin motifs 6-like [Orbicella faveolata]	1e-221	OG0000094	589	42	NA	NA	NA	NA	NA	NA
HyS0001.202	0	0.853317	0.295	0.001	0	Nematoblasts	12	nb_2	CUB domain-containing protein (Fragment)	NA	NA	NA	NA	XP_012554416.1 PREDICTED: uncharacterized protein LOC100208687 [Hydra vulgaris]	1.5e-28	OG0023715	3	3	YES	YES	NA	NA	NA	NA
HyS0001.265	0	5.5194	0.974	0.012	0	Nematoblasts	12	nb_2	NA	NA	NA	NA	NA	XP_002157094.3 PREDICTED: uncharacterized protein LOC100204652 isoform X1 [Hydra vulgaris]	2.5e-58	OG0011176	11	11	YES	NA	NA	NA	NA	NA
HyS0001.297	3e-224	1.30044	0.538	0.032	6.61e-220	Nematoblasts	12	nb_2	Glutathione-specific gamma-glutamylcyclotransferase 2	CHAC2	glutathione specific gamma-glutamylcyclotransferase activity	glutathione catabolic process	cytoplasm	XP_002156907.2 PREDICTED: putative glutathione-specific gamma-glutamylcyclotransferase 2 isoform X1 [Hydra vulgaris]	1.9e-49	OG0001489	94	45	NA	NA	NA	NA	NA	NA
HyS0001.308	0	1.54331	0.308	0.001	0	Nematoblasts	12	nb_2	NA	NA	NA	NA	NA	NA	NA	OG0023318	3	3	YES	YES	YES	NA	NA	NA
HyS0001.349	0	3.8756	0.756	0.029	0	Nematoblasts	12	nb_2	EGF-like repeat and discoidin I-like domain-containing protein 3	NA	catalase activity	cellular oxidant detoxification	integral component of membrane	XP_012560828.1 PREDICTED: uncharacterized protein LOC100203833 isoform X1 [Hydra vulgaris]	0	OG0000721	153	19	NA	NA	NA	NA	NA	NA
HyS0001.580	0	1.25401	0.455	0.008	0	Nematoblasts	12	nb_2	Hepatocyte growth factor	NA	serine-type endopeptidase activity	fibrinolysis	extracellular region	OWK61791.1 Plasminogen [Lonchura striata domestica]	6.9e-28	OG0000154	444	35	NA	NA	NA	NA	NA	NA
HyS0002.156	0	3.16691	0.801	0.007	0	Nematoblasts	12	nb_2	NA	NA	NA	NA	NA	NA	NA	OG0030932	2	2	YES	YES	YES	YES	YES	NA
HyS0002.19	0	1.50401	0.372	0.001	0	Nematoblasts	12	nb_2	NA	NA	NA	NA	NA	XP_004209094.1 PREDICTED: uncharacterized protein LOC101234615 [Hydra vulgaris]	6e-40	OG0023362	3	3	YES	YES	YES	NA	NA	NA
HyS0002.23	0	3.5508	0.904	0.007	0	Nematoblasts	12	nb_2	Staphylococcal protein A	NA	translation initiation factor activity	chitin metabolic process	cell surface	XP_012555588.1 PREDICTED: LOW QUALITY PROTEIN: fibroin heavy chain-like [Hydra vulgaris]	1.4e-57	OG0030773	2	2	YES	YES	YES	YES	YES	NA
HyS0002.271	0	3.3284	0.814	0.003	0	Nematoblasts	12	nb_2	Nematogalectin B	NA	carbohydrate binding	NA	nematocyst	XP_002160043.1 PREDICTED: uncharacterized protein LOC100210142 [Hydra vulgaris]	1.7e-76	OG0001542	92	17	NA	NA	NA	NA	NA	NA
HyS0002.272	0	1.97861	0.538	0.011	0	Nematoblasts	12	nb_2	SUEL-type lectin domain-containing protein	NA	carbohydrate binding	NA	NA	XP_004208646.1 PREDICTED: uncharacterized protein LOC100201983 [Hydra vulgaris]	5.5e-72	OG0001542	92	17	NA	NA	NA	NA	NA	NA
HyS0002.280	0	3.45923	0.949	0.029	0	Nematoblasts	12	nb_2	Macrophage receptor MARCO	NA	carbohydrate binding	glomerular basement membrane development	collagen trimer	BAJ22672.1 nematogalectin-related [Hydra viridissima]	5.6e-80	OG0001542	92	17	NA	NA	NA	NA	NA	NA
HyS0002.79	0	1.84339	0.712	0.012	0	Nematoblasts	12	nb_2	Ectonucleotide pyrophosphatase/phosphodiesterase 4	ENPP4	bis(5'-adenosyl)-triphosphatase activity	positive regulation of blood coagulation	integral component of membrane	XP_012565132.1 PREDICTED: ectonucleotide pyrophosphatase/phosphodiesterase family member 5-like [Hydra vulgaris]	1.2e-100	OG0000270	314	44	NA	NA	NA	NA	NA	NA
HyS0003.190	0	1.32238	0.526	0.002	0	Nematoblasts	12	nb_2	Serine incorporator 3	SERINC3	NA	phosphatidylserine metabolic process	Golgi apparatus	XP_012565576.1 PREDICTED: probable serine incorporator [Hydra vulgaris]	8e-136	OG0000601	173	49	NA	NA	NA	NA	NA	NA
HyS0003.271	1.04e-230	2.56183	0.462	0.022	2.29e-226	Nematoblasts	12	nb_2	Kinesin heavy chain	NA	microtubule motor activity	microtubule-based movement	cytoskeleton	XP_012554557.1 PREDICTED: kinesin-related protein 5-like isoform X1 [Hydra vulgaris]	2.3e-286	OG0010493	13	10	YES	NA	NA	NA	NA	NA
HyS0003.77	0	4.36457	0.974	0.006	0	Nematoblasts	12	nb_2	NA	NA	NA	NA	NA	XP_012564585.1 PREDICTED: putative uncharacterized protein DDB_G0282133 [Hydra vulgaris]	3.7e-57	OG0009083	19	14	YES	NA	NA	NA	NA	NA
HyS0004.398	0	1.37887	0.436	0.003	0	Nematoblasts	12	nb_2	NA	NA	NA	NA	NA	XP_012555852.1 PREDICTED: glutamic acid-rich protein-like [Hydra vulgaris]	4e-20	OG0011681	10	8	YES	YES	NA	NA	NA	NA
HyS0004.462	0	2.77719	0.878	0.018	0	Nematoblasts	12	nb_2	NA	NA	NA	NA	NA	XP_012560548.1 PREDICTED: uncharacterized protein LOC100210878 isoform X1 [Hydra vulgaris]	1.2e-299	OG0019601	4	4	YES	YES	NA	NA	NA	NA
HyS0004.468	2.55e-227	0.651479	0.256	0.005	5.62e-223	Nematoblasts	12	nb_2	NA	NA	NA	NA	NA	NA	NA	OG0030852	2	2	YES	YES	YES	YES	YES	NA
HyS0004.469	0	1.62814	0.654	0.015	0	Nematoblasts	12	nb_2	NA	NA	NA	NA	NA	NA	NA	OG0030853	2	2	YES	YES	YES	YES	YES	NA
HyS0004.507	0	2.73264	0.84	0.043	0	Nematoblasts	12	nb_2	NA	NA	NA	NA	NA	XP_012559978.1 PREDICTED: uncharacterized protein LOC100211175, partial [Hydra vulgaris]	1.1e-184	OG0014070	7	4	YES	YES	NA	NA	NA	NA
HyS0004.85	0	2.91498	0.91	0.012	0	Nematoblasts	12	nb_2	NA	NA	NA	NA	NA	XP_012555318.1 PREDICTED: uncharacterized protein LOC105843905 [Hydra vulgaris]	5.6e-30	OG0019654	4	4	YES	YES	NA	NA	NA	NA
HyS0005.16	0	2.94437	0.885	0.019	0	Nematoblasts	12	nb_2	NA	NA	NA	NA	NA	XP_002169063.2 PREDICTED: uncharacterized protein LOC100203318 [Hydra vulgaris]	0	OG0012223	9	7	YES	YES	NA	NA	NA	NA
HyS0005.226	0	2.2335	0.506	0.002	0	Nematoblasts	12	nb_2	Nematocyst outer wall antigen	NA	structural constituent of cell wall	actin cytoskeleton organization	integral component of membrane	NA	NA	OG0012786	8	8	YES	NA	NA	NA	NA	NA
HyS0005.253	0	1.56851	0.609	0.021	0	Nematoblasts	12	nb_2	Lactadherin	NA	calcium ion binding	cellular oxidant detoxification	integral component of membrane	XP_012555797.1 PREDICTED: uncharacterized protein LOC100204986 isoform X1 [Hydra vulgaris]	0	OG0001126	114	16	YES	NA	NA	NA	NA	NA
HyS0005.259	0	4.16273	0.981	0.024	0	Nematoblasts	12	nb_2	NA	NA	NA	NA	NA	NA	NA	OG0030798	2	2	YES	YES	YES	YES	YES	NA
HyS0005.395	0	4.34563	0.91	0.017	0	Nematoblasts	12	nb_2	C-type mannose receptor 2	NA	NA	NA	collagen trimer	XP_012553683.1 PREDICTED: uncharacterized protein LOC100203426 isoform X4 [Hydra vulgaris]	0	OG0000563	181	21	NA	NA	NA	NA	NA	NA
HyS0006.343	0	1.08332	0.417	0.005	0	Nematoblasts	12	nb_2	NA	NA	NA	NA	NA	EKC37030.1 hypothetical protein CGI_10026017 [Crassostrea gigas]	1.6e-27	OG0000610	171	43	NA	NA	NA	NA	NA	NA
HyS0006.403	0	2.05666	0.712	0.004	0	Nematoblasts	12	nb_2	Sodium potassium calcium exchanger 5	SLC24A5	calcium, potassium:sodium antiporter activity	cellular calcium ion homeostasis	trans-Golgi network	XP_012560914.1 PREDICTED: sodium/potassium/calcium exchanger 3-like [Hydra vulgaris]	3.2e-188	OG0000427	224	41	NA	NA	NA	NA	NA	NA
HyS0007.183	0	2.08147	0.808	0.041	0	Nematoblasts	12	nb_2	Furin, paired basic amino acid cleaving enzyme	PCSK1	serine-type endopeptidase activity	proteolysis	extracellular space	XP_012558177.1 PREDICTED: neuroendocrine convertase 1-like [Hydra vulgaris]	0	OG0000221	362	49	NA	NA	NA	NA	NA	NA
HyS0007.295	0	1.05708	0.429	0.009	0	Nematoblasts	12	nb_2	Rab GTPase	NA	GTPase activity	pre-mRNA catabolic process	Golgi subcompartment	Q05974.1 RecName: Full=Ras-related protein Rab-1A	1.5e-60	OG0000068	717	49	NA	NA	NA	NA	NA	NA
HyS0008.11	0	3.41348	0.795	0.027	0	Nematoblasts	12	nb_2	NA	NA	NA	NA	NA	XP_002161090.3 PREDICTED: uncharacterized protein LOC100202793 [Hydra vulgaris]	4.3e-66	OG0012890	8	8	YES	YES	NA	NA	NA	NA
HyS0008.377	0	2.16508	0.538	0.003	0	Nematoblasts	12	nb_2	Cyclic AMP-dependent transcription factor ATF-3	NA	DNA-binding transcription factor activity	regulation of transcription by RNA polymerase II	nucleus	XP_004205502.1 PREDICTED: cyclic AMP-dependent transcription factor ATF-3-like [Hydra vulgaris]	7.9e-37	OG0001113	115	42	NA	NA	NA	NA	NA	NA
HyS0008.54	0	1.58146	0.654	0.016	0	Nematoblasts	12	nb_2	NA	NA	NA	NA	NA	XP_027044317.1 uncharacterized protein LOC113672228 [Pocillopora damicornis]	1e-100	OG0000513	196	15	YES	NA	NA	NA	NA	NA
HyS0008.73	0	1.79494	0.654	0.006	0	Nematoblasts	12	nb_2	NA	NA	NA	NA	NA	XP_012564541.1 PREDICTED: uncharacterized protein LOC100212038 [Hydra vulgaris]	7.4e-114	OG0000200	384	37	NA	NA	NA	NA	NA	NA
HyS0008.82	0	1.3775	0.468	0.005	0	Nematoblasts	12	nb_2	Amiloride-sensitive cation channel	ASIC1	sodium channel activity	sodium ion transmembrane transport	synapse	XP_012561510.1 PREDICTED: acid-sensing ion channel 1-like, partial [Hydra vulgaris]	3.7e-219	OG0000025	1194	41	NA	NA	NA	NA	NA	NA
HyS0009.107	0	2.83544	0.744	0.004	0	Nematoblasts	12	nb_2	NA	NA	NA	NA	NA	XP_004205882.1 PREDICTED: uncharacterized protein LOC101239119 [Hydra vulgaris]	2.7e-41	OG0012222	9	8	YES	YES	NA	NA	NA	NA
HyS0009.213	1.24e-249	0.803426	0.269	0.005	2.72e-245	Nematoblasts	12	nb_2	Pectin acetylesterase	NA	hydrolase activity	cell wall organization	cell wall	XP_001639461.1 predicted protein [Nematostella vectensis]	1.7e-73	OG0001345	101	37	NA	NA	NA	NA	NA	NA
HyS0009.235	1.08e-205	0.839445	0.385	0.016	2.39e-201	Nematoblasts	12	nb_2	General substrate transporter	NA	transmembrane transporter activity	transmembrane transport	integral component of plasma membrane	XP_012558384.1 PREDICTED: synaptic vesicle 2-related protein-like [Hydra vulgaris]	4.3e-193	OG0000215	369	48	NA	NA	NA	NA	NA	NA
HyS0010.24	0	1.44321	0.442	0.004	0	Nematoblasts	12	nb_2	Zinc carboxypeptidase	NA	metallocarboxypeptidase activity	proteolysis	extracellular space	XP_020907193.1 carboxypeptidase B-like [Exaiptasia pallida]	1.1e-59	OG0000227	357	43	NA	NA	NA	NA	NA	NA
HyS0010.363	0	0.81016	0.333	0.006	0	Nematoblasts	12	nb_2	Vesicular inhibitory amino acid transporter	SLC32A1	amino acid transmembrane transporter activity	amino acid transmembrane transport	integral component of membrane	XP_002163920.1 PREDICTED: vesicular inhibitory amino acid transporter-like [Hydra vulgaris]	3.8e-177	OG0000438	220	42	NA	NA	NA	NA	NA	NA
HyS0010.54	0	4.81279	0.756	0.004	0	Nematoblasts	12	nb_2	Ribonuclease E	NA	ribonuclease E activity	mRNA catabolic process	cytoplasmic side of plasma membrane	XP_012554430.1 PREDICTED: uncharacterized protein PF11_0213-like [Hydra vulgaris]	1.7e-81	OG0023370	3	3	YES	YES	YES	NA	NA	NA
HyS0010.56	0	1.9673	0.615	0.028	0	Nematoblasts	12	nb_2	ADP ribosylation factor	RAB9A	GTPase activity	Rab protein signal transduction	phagocytic vesicle	XP_002161676.1 PREDICTED: ras-related protein Rab-9B-like [Hydra vulgaris]	1.3e-83	OG0001110	115	49	NA	NA	NA	NA	NA	NA
HyS0011.190	0	1.62058	0.647	0.027	0	Nematoblasts	12	nb_2	NA	NA	NA	NA	NA	XP_012566200.1 PREDICTED: uveal autoantigen with coiled-coil domains and ankyrin repeats-like, partial [Hydra vulgaris]	1.2e-79	OG0006985	35	23	NA	NA	NA	NA	NA	NA
HyS0011.210	0	2.43547	0.577	0.016	0	Nematoblasts	12	nb_2	Furin (paired basic amino acid cleaving enzyme) a	PCSK6	serine-type endopeptidase activity	proteolysis	integral component of Golgi membrane	XP_012557310.1 PREDICTED: uncharacterized protein LOC100202203 [Hydra vulgaris]	0	OG0000221	362	49	NA	NA	NA	NA	NA	NA
HyS0011.266	0	1.57468	0.609	0.011	0	Nematoblasts	12	nb_2	Zinc finger MYM-type protein 1	NA	ion channel activity	ion transmembrane transport	integral component of membrane	XP_012566755.1 PREDICTED: transient receptor potential cation channel subfamily A member 1 homolog [Hydra vulgaris]	3.2e-126	OG0000130	502	44	NA	NA	NA	NA	NA	NA
HyS0011.268	0	0.964646	0.41	0.006	0	Nematoblasts	12	nb_2	NA	NA	NA	NA	NA	XP_012566755.1 PREDICTED: transient receptor potential cation channel subfamily A member 1 homolog [Hydra vulgaris]	2.3e-11	OG0023214	3	3	NA	NA	NA	NA	NA	NA
HyS0012.137	0	1.01977	0.327	0.002	0	Nematoblasts	12	nb_2	A disintegrin and metalloproteinase with thrombospondin motifs 12	NA	fucosyltransferase activity	fucosylation	Golgi cisterna membrane	XP_002164302.2 PREDICTED: alpha-(1,3)-fucosyltransferase 11-like [Hydra vulgaris]	1.1e-192	OG0000064	743	44	NA	NA	NA	NA	NA	NA
HyS0012.151	0	1.11188	0.429	0.005	0	Nematoblasts	12	nb_2	A disintegrin and metalloproteinase with thrombospondin motifs 12	NA	fucosyltransferase activity	fucosylation	Golgi cisterna membrane	XP_002164302.2 PREDICTED: alpha-(1,3)-fucosyltransferase 11-like [Hydra vulgaris]	5e-192	OG0004911	50	3	YES	YES	YES	YES	NA	NA
HyS0012.171	0	1.07172	0.423	0.009	0	Nematoblasts	12	nb_2	NA	NA	NA	NA	NA	XP_012557348.1 PREDICTED: uncharacterized protein LOC101236922 [Hydra vulgaris]	7.6e-166	OG0014531	6	6	YES	YES	NA	NA	NA	NA
HyS0012.187	0	1.5537	0.564	0.003	0	Nematoblasts	12	nb_2	NA	NA	NA	NA	NA	XP_012556704.1 PREDICTED: uncharacterized protein LOC101239769 [Hydra vulgaris]	1.3e-43	OG0031440	2	2	YES	YES	YES	YES	YES	NA
HyS0012.239	0	4.05247	0.994	0.016	0	Nematoblasts	12	nb_2	NA	NA	NA	NA	NA	NA	NA	Unassigned	NA	NA	NA	NA	NA	NA	NA	NA
HyS0012.266	0	4.42293	0.897	0.007	0	Nematoblasts	12	nb_2	NA	NA	NA	NA	NA	XP_012553782.1 PREDICTED: uncharacterized protein LOC101240599 [Hydra vulgaris]	1.3e-72	OG0011272	11	7	YES	YES	NA	NA	NA	NA
HyS0014.15	0	1.53147	0.583	0.007	0	Nematoblasts	12	nb_2	Molting fluid carboxypeptidase A	NA	metallocarboxypeptidase activity	proteolysis	anchored component of plasma membrane	XP_012554915.1 PREDICTED: mast cell carboxypeptidase A-like [Hydra vulgaris]	4.6e-63	OG0000227	357	43	NA	NA	NA	NA	NA	NA
HyS0014.321	0	4.18016	0.923	0.009	0	Nematoblasts	12	nb_2	NA	NA	NA	NA	NA	NA	NA	OG0019599	4	3	YES	YES	YES	NA	NA	NA
HyS0014.52	0	2.28177	0.404	0.003	0	Nematoblasts	12	nb_2	NA	NA	NA	NA	NA	XP_006817663.1 PREDICTED: pogo transposable element with KRAB domain-like [Saccoglossus kowalevskii]	2.5e-15	OG0010262	14	9	NA	NA	NA	NA	NA	NA
HyS0015.190	0	3.98599	0.763	0.005	0	Nematoblasts	12	nb_2	Cellular retinaldehyde binding/alpha-tocopherol transport	NA	NAD-dependent histone deacetylase activity (H3-K14 specific)	chromatin organization	nucleosome	XP_012554540.1 PREDICTED: uncharacterized protein LOC101238859 [Hydra vulgaris]	3.6e-308	OG0000721	153	19	NA	NA	NA	NA	NA	NA
HyS0015.245	0	4.9983	0.885	0.009	0	Nematoblasts	12	nb_2	Adhesion G-protein coupled receptor D1	NA	G protein-coupled receptor activity	G protein-coupled receptor signaling pathway	cell surface	XP_012559496.1 PREDICTED: uncharacterized protein LOC100197733 [Hydra vulgaris]	5.5e-164	OG0008454	23	16	YES	NA	NA	NA	NA	NA
HyS0015.248	0	2.3746	0.615	0.003	0	Nematoblasts	12	nb_2	NA	NA	NA	NA	NA	XP_012559129.1 PREDICTED: uncharacterized protein LOC105845670 [Hydra vulgaris]	1e-26	OG0012849	8	8	YES	YES	NA	NA	NA	NA
HyS0015.250	0	2.24038	0.776	0.009	0	Nematoblasts	12	nb_2	Mitogen-activated protein kinase kinase kinase	MAP3K12	MAP kinase kinase kinase activity	activation of MAPKK activity	growth cone	XP_012564397.1 PREDICTED: mitogen-activated protein kinase kinase kinase 12-like [Hydra vulgaris]	8.9e-161	OG0000394	235	47	NA	NA	NA	NA	NA	NA
HyS0015.262	0	3.90835	0.981	0.014	0	Nematoblasts	12	nb_2	Glycosyl hydrolase family 10 protein / carbohydrate-binding domain-containing protein	NA	hydrolase activity, hydrolyzing O-glycosyl compounds	carbohydrate metabolic process	NA	XP_022786599.1 uncharacterized protein LOC111326795 [Stylophora pistillata]	1.4e-125	OG0002665	66	21	NA	NA	NA	NA	NA	NA
HyS0016.13	0	0.840655	0.321	0.002	0	Nematoblasts	12	nb_2	Proton-coupled amino acid transporter 1	SLC36A1	L-alanine transmembrane transporter activity	L-alanine transport	endoplasmic reticulum	XP_002154489.2 PREDICTED: proton-coupled amino acid transporter 1-like [Hydra vulgaris]	1.1e-156	OG0000528	192	49	NA	NA	NA	NA	NA	NA
HyS0016.133	0	2.2654	0.821	0.017	0	Nematoblasts	12	nb_2	Sodium/hydrogen exchanger	SLC9A9	sodium:proton antiporter activity	regulation of pH	recycling endosome	RMX54874.1 hypothetical protein pdam_00023315 [Pocillopora damicornis]	1.3e-190	OG0000752	147	48	NA	NA	NA	NA	NA	NA
HyS0017.195	0	2.3678	0.744	0.025	0	Nematoblasts	12	nb_2	NA	NA	NA	NA	NA	XP_004206580.2 PREDICTED: myb-like protein X [Hydra vulgaris]	4.5e-234	OG0001616	89	17	NA	NA	NA	NA	NA	NA
HyS0017.40	1.05e-289	0.790166	0.263	0.003	2.32e-285	Nematoblasts	12	nb_2	Dickkopf protein 3	DKK3	co-receptor binding	negative regulation of Wnt signaling pathway	extracellular region	XP_004207403.1 PREDICTED: dickkopf-related protein 3-like [Hydra vulgaris]	6.2e-34	OG0001829	82	22	NA	NA	NA	NA	NA	NA
HyS0017.95	0	1.48153	0.603	0.004	0	Nematoblasts	12	nb_2	NA	NA	NA	NA	NA	XP_012563110.1 PREDICTED: dickkopf-related protein 3-like [Hydra vulgaris]	1.1e-55	OG0001829	82	22	NA	NA	NA	NA	NA	NA
HyS0018.175	0	1.46145	0.423	0.009	0	Nematoblasts	12	nb_2	Nematocyst outer wall antigen	NA	carbohydrate binding	keratinization	keratin filament	ABY71251.1 nematocyst outer wall antigen precursor [Clytia hemisphaerica]	2.2e-43	OG0009490	17	13	YES	NA	NA	NA	NA	NA
HyS0018.52	0	3.21256	0.923	0.014	0	Nematoblasts	12	nb_2	Carbonic anhydrase	NA	carbonate dehydratase activity	NA	mitochondrion	XP_012559563.1 PREDICTED: uncharacterized protein LOC105845880 isoform X1 [Hydra vulgaris]	8.3e-86	OG0000123	512	46	NA	NA	NA	NA	NA	NA
HyS0018.84	0	3.37884	0.923	0.032	0	Nematoblasts	12	nb_2	NA	NA	NA	NA	NA	XP_011402684.2 PREDICTED: uncharacterized protein LOC105312051 [Amphimedon queenslandica]	1e-216	OG0010555	13	8	NA	NA	NA	NA	NA	NA
HyS0019.62	0	1.09565	0.385	0.004	0	Nematoblasts	12	nb_2	Double-stranded RNA-specific editase Adar	MFSD6	nucleoside transmembrane transporter activity	nucleoside transmembrane transport	integral component of membrane	XP_012554333.1 PREDICTED: major facilitator superfamily domain-containing protein 6-like [Hydra vulgaris]	2.6e-218	OG0000195	391	44	NA	NA	NA	NA	NA	NA
HyS0020.154	0	1.81916	0.75	0.005	0	Nematoblasts	12	nb_2	Halomucin	NA	calcium ion binding	NA	integral component of membrane	XP_004208415.1 PREDICTED: uncharacterized protein LOC100215004 [Hydra vulgaris]	5.9e-191	OG0000721	153	19	NA	NA	NA	NA	NA	NA
HyS0020.155	5.73e-293	1.12097	0.327	0.006	1.26e-288	Nematoblasts	12	nb_2	NA	NA	NA	NA	NA	XP_002155707.1 PREDICTED: uncharacterized protein LOC100210596 [Hydra vulgaris]	3.1e-259	OG0000721	153	19	NA	NA	NA	NA	NA	NA
HyS0020.203	0	1.96638	0.654	0.013	0	Nematoblasts	12	nb_2	NA	NA	NA	NA	NA	XP_012564115.1 PREDICTED: uncharacterized protein LOC100202167 [Hydra vulgaris]	7.7e-09	OG0019635	4	3	YES	YES	YES	NA	NA	NA
HyS0020.207	0	2.06038	0.699	0.013	0	Nematoblasts	12	nb_2	NA	NA	NA	NA	NA	XP_012564115.1 PREDICTED: uncharacterized protein LOC100202167 [Hydra vulgaris]	2.3e-08	OG0019635	4	3	YES	YES	YES	NA	NA	NA
HyS0020.281	0	1.83306	0.686	0.006	0	Nematoblasts	12	nb_2	NA	NA	NA	NA	NA	NA	NA	OG0030734	2	2	YES	YES	YES	YES	YES	NA
HyS0021.276	0	1.45982	0.532	0.007	0	Nematoblasts	12	nb_2	Sushi, nidogen and EGF-like domain-containing protein 1	NA	calcium ion binding	Notch signaling pathway	integral component of membrane	XP_002154205.3 PREDICTED: neurogenic locus Notch protein-like [Hydra vulgaris]	1.4e-215	OG0000608	172	20	NA	NA	NA	NA	NA	NA
HyS0021.33	0	1.52382	0.622	0.019	0	Nematoblasts	12	nb_2	Metalloendopeptidase	NA	calcium ion binding	multicellular organism development	extracellular region	XP_012559026.1 PREDICTED: neurogenic locus notch homolog protein 2-like [Hydra vulgaris]	1.7e-65	OG0000023	1217	47	NA	NA	NA	NA	NA	NA
HyS0021.40	0	0.932596	0.385	0.008	0	Nematoblasts	12	nb_2	Metalloendopeptidase	NA	calcium ion binding	multicellular organism development	extracellular region	XP_012559026.1 PREDICTED: neurogenic locus notch homolog protein 2-like [Hydra vulgaris]	1e-65	OG0000023	1217	47	NA	NA	NA	NA	NA	NA
HyS0021.78	0	1.62815	0.538	0.003	0	Nematoblasts	12	nb_2	GRANULINS domain-containing protein	NA	NA	NA	NA	XP_012563329.1 PREDICTED: uncharacterized protein LOC100209737 [Hydra vulgaris]	4.1e-110	OG0007471	31	15	NA	NA	NA	NA	NA	NA
HyS0022.163	0	1.87308	0.571	0.004	0	Nematoblasts	12	nb_2	Zinc finger protein 16	NA	nucleic acid binding	regulation of cellular metabolic process	nucleus	XP_002157355.1 PREDICTED: zinc finger protein 26-like [Hydra vulgaris]	2e-43	OG0009950	15	14	YES	NA	NA	NA	NA	NA
HyS0022.204	0	1.06752	0.417	0.005	0	Nematoblasts	12	nb_2	NA	NA	NA	NA	NA	XP_002161287.3 PREDICTED: synaptotagmin-14-like [Hydra vulgaris]	6.2e-51	OG0012820	8	7	YES	NA	NA	NA	NA	NA
HyS0022.205	0	1.46916	0.571	0.019	0	Nematoblasts	12	nb_2	NA	NA	NA	NA	NA	XP_002161287.3 PREDICTED: synaptotagmin-14-like [Hydra vulgaris]	1.1e-102	OG0000052	896	49	NA	NA	NA	NA	NA	NA
HyS0022.78	0	3.83968	0.885	0.012	0	Nematoblasts	12	nb_2	Kunitz-type serine protease inhibitor cvp2	NID2	calcium ion binding	cell-matrix adhesion	extracellular region	XP_002154795.2 PREDICTED: uncharacterized protein LOC100208971 isoform X1 [Hydra vulgaris]	3.8e-156	OG0000132	496	42	NA	NA	NA	NA	NA	NA
HyS0022.96	0	1.22523	0.423	0.003	0	Nematoblasts	12	nb_2	Vesicular glutamate transporter 3	SLC17A5	sialic acid transmembrane transporter activity	transmembrane transport	integral component of plasma membrane	XP_012556561.1 PREDICTED: sialin-like [Hydra vulgaris]	2.6e-201	OG0000096	584	46	NA	NA	NA	NA	NA	NA
HyS0023.303	0	3.4389	0.942	0.001	0	Nematoblasts	12	nb_2	NA	NA	NA	NA	NA	NA	NA	OG0030807	2	2	YES	YES	YES	YES	YES	NA
HyS0024.13	0	2.40915	0.628	0.002	0	Nematoblasts	12	nb_2	EF-Hand 1, calcium-binding site	NA	protein kinase activity	protein phosphorylation	integral component of membrane	XP_012554147.1 PREDICTED: uncharacterized protein LOC100209746 [Hydra vulgaris]	5.6e-33	OG0023338	3	3	YES	YES	YES	NA	NA	NA
HyS0024.229	0	1.47547	0.487	0.006	0	Nematoblasts	12	nb_2	NA	NA	NA	NA	NA	XP_012566942.1 PREDICTED: uncharacterized protein LOC105850934 [Hydra vulgaris]	4e-23	OG0009941	15	15	YES	NA	NA	NA	NA	NA
HyS0024.61	0	1.10297	0.372	0.002	0	Nematoblasts	12	nb_2	Synaptotagmin 2	SYT2	calcium-dependent phospholipid binding	neurotransmitter secretion	synaptic vesicle	XP_012563451.1 PREDICTED: synaptotagmin-1-like [Hydra vulgaris]	3.7e-134	OG0000052	896	49	NA	NA	NA	NA	NA	NA
HyS0024.62	0	3.10725	0.679	0.005	0	Nematoblasts	12	nb_2	A disintegrin and metalloproteinase with thrombospondin motifs 6	NA	metalloendopeptidase activity	proteolysis	extracellular matrix	XP_012559175.1 PREDICTED: A disintegrin and metalloproteinase with thrombospondin motifs 6-like [Hydra vulgaris]	0	OG0000094	589	42	NA	NA	NA	NA	NA	NA
HyS0025.216	0	1.46966	0.558	0.009	0	Nematoblasts	12	nb_2	NA	NA	NA	NA	NA	NA	NA	OG0018203	4	4	YES	YES	NA	NA	NA	NA
HyS0026.199	0	1.8646	0.667	0.015	0	Nematoblasts	12	nb_2	Fe2OG dioxygenase domain-containing protein	NA	L-ascorbic acid binding	peptidyl-proline hydroxylation to 4-hydroxy-L-proline	endoplasmic reticulum	XP_012553894.1 PREDICTED: transmembrane prolyl 4-hydroxylase-like, partial [Hydra vulgaris]	5e-138	OG0000518	195	26	NA	NA	NA	NA	NA	NA
HyS0027.123	0	0.781722	0.308	0.003	0	Nematoblasts	12	nb_2	Leishmanolysin like peptidase	LMLN	metalloendopeptidase activity	cell adhesion	focal adhesion	XP_012558668.1 PREDICTED: leishmanolysin-like peptidase [Hydra vulgaris]	2.8e-233	OG0000974	125	43	NA	NA	NA	NA	NA	NA
HyS0028.121	0	2.95724	0.853	0.006	0	Nematoblasts	12	nb_2	NA	NA	NA	NA	NA	XP_002156857.2 PREDICTED: uncharacterized protein LOC100215884 [Hydra vulgaris]	3.5e-104	OG0007260	33	7	YES	YES	NA	NA	NA	NA
HyS0028.191	0	3.68225	0.974	0.007	0	Nematoblasts	12	nb_2	NA	NA	NA	NA	NA	XP_012561979.1 PREDICTED: uncharacterized protein LOC100208000 [Hydra vulgaris]	1.1e-107	OG0009962	15	15	YES	NA	NA	NA	NA	NA
HyS0028.197	0	4.97881	0.968	0.02	0	Nematoblasts	12	nb_2	NA	NA	NA	NA	NA	XP_004205719.2 PREDICTED: putative uncharacterized protein DDB_G0282133 [Hydra vulgaris]	4.1e-21	OG0022183	3	3	YES	YES	YES	YES	NA	NA
HyS0028.95	0	2.74596	0.615	0.006	0	Nematoblasts	12	nb_2	Hyaluronidase	HYAL1	hyalurononglucosaminidase activity	regulation of hyaluranon cable assembly	hyaluranon cable	XP_012557317.1 PREDICTED: hyaluronidase 1-like [Hydra vulgaris]	4.6e-160	OG0002387	69	29	NA	NA	NA	NA	NA	NA
HyS0032.186	0	2.49411	0.782	0.008	0	Nematoblasts	12	nb_2	NA	NA	NA	NA	NA	XP_012560642.1 PREDICTED: uncharacterized protein LOC100213554, partial [Hydra vulgaris]	5.1e-83	OG0009540	17	9	YES	NA	NA	NA	NA	NA
HyS0032.3	0	2.32199	0.808	0.005	0	Nematoblasts	12	nb_2	Counting factor associated protein D	NA	cysteine-type peptidase activity	proteolysis	lysosome	XP_002164575.3 PREDICTED: germination-specific cysteine protease 1-like isoform X2 [Hydra vulgaris]	3e-252	OG0001065	118	38	NA	NA	NA	NA	NA	NA
HyS0034.126	0	4.4882	0.987	0.013	0	Nematoblasts	12	nb_2	Endothelin-converting enzyme	NA	metalloendopeptidase activity	proteolysis	integral component of membrane	XP_002166665.1 PREDICTED: endothelin-converting enzyme 1-like [Hydra vulgaris]	0	OG0000072	655	46	NA	NA	NA	NA	NA	NA
HyS0034.13	2.58e-213	1.42484	0.622	0.046	5.68e-209	Nematoblasts	12	nb_2	Focal adhesion kinase	NA	protein tyrosine kinase activity	signal complex assembly	focal adhesion	AAV97963.1 protein-tyrosine kinase, partial [Hydractinia echinata]	0	OG0000044	972	48	NA	NA	NA	NA	NA	NA
HyS0034.150	0	1.29002	0.481	0.005	0	Nematoblasts	12	nb_2	NA	NA	NA	NA	NA	XP_004212433.2 PREDICTED: uncharacterized protein LOC100206144 [Hydra vulgaris]	2.3e-141	OG0011687	10	8	YES	YES	NA	NA	NA	NA
HyS0035.22	0	1.82097	0.513	0.003	0	Nematoblasts	12	nb_2	E3 ubiquitin-protein ligase, putative	NA	ubiquitin-protein transferase activity	protein ubiquitination	integral component of membrane	NA	NA	OG0019614	4	3	YES	YES	YES	NA	NA	NA
HyS0035.70	0	2.88826	0.814	0.005	0	Nematoblasts	12	nb_2	NA	NA	NA	NA	NA	NA	NA	OG0010582	13	8	YES	YES	NA	NA	NA	NA
HyS0035.72	0	2.83846	0.769	0.005	0	Nematoblasts	12	nb_2	NA	NA	NA	NA	NA	NA	NA	OG0010582	13	8	YES	YES	NA	NA	NA	NA
HyS0038.119	0	1.63596	0.282	0	0	Nematoblasts	12	nb_2	NA	NA	NA	NA	NA	NA	NA	OG0023293	3	3	YES	YES	YES	NA	NA	NA
HyS0039.17	0	4.26364	0.923	0.005	0	Nematoblasts	12	nb_2	Collagen alpha-5(VI) chain	NA	NA	NA	collagen trimer	XP_012558884.1 PREDICTED: uncharacterized protein LOC101236314 [Hydra vulgaris]	4.2e-27	OG0010584	13	8	YES	YES	NA	NA	NA	NA
HyS0039.19	0	0.932943	0.288	0.001	0	Nematoblasts	12	nb_2	NA	NA	NA	NA	NA	NA	NA	OG0010584	13	8	YES	YES	NA	NA	NA	NA
HyS0039.29	0	4.38203	0.962	0.007	0	Nematoblasts	12	nb_2	Cobalamin biosynthesis protein CobW	NA	FMN binding	metal ion transport	membrane	XP_012561419.1 PREDICTED: MATH and LRR domain-containing protein PFE0570w-like [Hydra vulgaris]	5.6e-113	OG0010298	14	8	YES	NA	NA	NA	NA	NA
HyS0040.87	0	1.40168	0.487	0.002	0	Nematoblasts	12	nb_2	Tissue alpha-L-fucosidase	FUCA2	alpha-L-fucosidase activity	fucose metabolic process	lysosome	XP_002154947.3 PREDICTED: tissue alpha-L-fucosidase-like [Hydra vulgaris]	1.8e-209	OG0000606	172	41	NA	NA	NA	NA	NA	NA
HyS0041.111	0	1.51815	0.474	0.004	0	Nematoblasts	12	nb_2	NA	NA	NA	NA	NA	NA	NA	OG0022088	3	3	YES	YES	YES	YES	NA	NA
HyS0042.157	3.79e-229	1.62415	0.359	0.012	8.35e-225	Nematoblasts	12	nb_2	Gamma-glutamylcyclotransferase	CHAC2	glutathione specific gamma-glutamylcyclotransferase activity	glutathione catabolic process	cytoplasm	XP_002161470.1 PREDICTED: glutathione-specific gamma-glutamylcyclotransferase 1-like [Hydra vulgaris]	2e-79	OG0001489	94	45	NA	NA	NA	NA	NA	NA
HyS0042.25	0	1.46974	0.519	0.011	0	Nematoblasts	12	nb_2	Vesicular glutamate transporter 1	SLC17A7	calcium ion binding	transmembrane transport	integral component of plasma membrane	XP_002158255.2 PREDICTED: vesicular glutamate transporter 2-like isoform X1 [Hydra vulgaris]	7e-23	OG0014671	6	5	NA	NA	NA	NA	NA	NA
HyS0042.67	0	3.69728	0.968	0.01	0	Nematoblasts	12	nb_2	NA	NA	NA	NA	NA	NA	NA	OG0023570	3	2	YES	YES	YES	YES	YES	NA
HyS0042.87	5.37e-232	0.822509	0.365	0.012	1.18e-227	Nematoblasts	12	nb_2	Vesicular glutamate transporter 1	NA	sialic acid transmembrane transporter activity	transmembrane transport	integral component of plasma membrane	XP_002158255.2 PREDICTED: vesicular glutamate transporter 2-like isoform X1 [Hydra vulgaris]	4.9e-96	OG0000096	584	46	NA	NA	NA	NA	NA	NA
HyS0042.90	0	1.17208	0.404	0.004	0	Nematoblasts	12	nb_2	NA	NA	NA	NA	NA	XP_002164803.1 PREDICTED: vesicular inhibitory amino acid transporter-like [Hydra vulgaris]	3.2e-192	OG0001205	109	29	NA	NA	NA	NA	NA	NA
HyS0043.17	0	2.00074	0.756	0.013	0	Nematoblasts	12	nb_2	Retinoid X receptor	NR2F1A	steroid hormone receptor activity	steroid hormone mediated signaling pathway	nucleus	XP_002168741.3 PREDICTED: nuclear receptor subfamily 2 group F member 1-B-like [Hydra vulgaris]	9.5e-85	OG0000039	1012	42	NA	NA	NA	NA	NA	NA
HyS0044.156	0	2.00979	0.686	0.006	0	Nematoblasts	12	nb_2	Signal peptide	NA	cadherin binding	cell adhesion	integral component of membrane	XP_002170490.2 PREDICTED: uncharacterized protein LOC100210725 [Hydra vulgaris]	6.1e-183	OG0000703	156	15	YES	NA	NA	NA	NA	NA
HyS0044.164	0	2.92829	0.769	0.018	0	Nematoblasts	12	nb_2	NA	NA	NA	NA	NA	XP_004210897.2 PREDICTED: uncharacterized protein LOC101240327 [Hydra vulgaris]	2.5e-199	OG0000721	153	19	NA	NA	NA	NA	NA	NA
HyS0044.45	0	3.02085	0.679	0.009	0	Nematoblasts	12	nb_2	extracellular matrix protein A	NA	calcium ion binding	homophilic cell adhesion via plasma membrane adhesion molecules	plasma membrane	XP_012557050.1 PREDICTED: uncharacterized protein LOC100203132 [Hydra vulgaris]	1.6e-246	OG0001126	114	16	YES	NA	NA	NA	NA	NA
HyS0045.134	0	1.57416	0.628	0.021	0	Nematoblasts	12	nb_2	Sushi, von Willebrand factor type A, EGF and pentraxin domain containing 1	NA	calcium ion binding	Notch signaling pathway	integral component of membrane	XP_012561551.1 PREDICTED: fibrillin-1-like [Hydra vulgaris]	2.9e-132	OG0000023	1217	47	NA	NA	NA	NA	NA	NA
HyS0045.3	0	0.972036	0.372	0.006	0	Nematoblasts	12	nb_2	NA	NA	NA	NA	NA	NA	NA	OG0016462	5	4	YES	YES	YES	NA	NA	NA
HyS0046.90	0	2.44679	0.814	0.016	0	Nematoblasts	12	nb_2	C-type lectin domain family 17, member A	NA	carbohydrate binding	NA	integral component of membrane	XP_012555546.1 PREDICTED: uncharacterized protein LOC100211311 [Hydra vulgaris]	2e-99	OG0001570	91	16	NA	NA	NA	NA	NA	NA
HyS0047.155	0	2.32465	0.622	0.013	0	Nematoblasts	12	nb_2	Carbohydrate sulfotransferase	CHST13	sulfotransferase activity	carbohydrate biosynthetic process	Golgi membrane	XP_012559651.1 PREDICTED: carbohydrate sulfotransferase 11-like isoform X2 [Hydra vulgaris]	2.2e-117	OG0000177	415	37	NA	NA	NA	NA	NA	NA
HyS0047.175	0	1.44819	0.564	0.009	0	Nematoblasts	12	nb_2	Galactosylceramide sulfotransferase	GAL3ST1	galactosylceramide sulfotransferase activity	glycolipid biosynthetic process	Golgi apparatus	XP_002163796.1 PREDICTED: uncharacterized protein LOC100209212 isoform X2 [Hydra vulgaris]	5.7e-163	OG0000143	471	36	NA	NA	NA	NA	NA	NA
HyS0047.39	0	2.00713	0.263	0.001	0	Nematoblasts	12	nb_2	NA	NA	NA	NA	NA	XP_012566760.1 PREDICTED: uncharacterized protein LOC101239872, partial [Hydra vulgaris]	2.1e-08	OG0014952	6	4	YES	YES	YES	NA	NA	NA
HyS0047.82	0	1.32833	0.404	0.004	0	Nematoblasts	12	nb_2	CAS1 domain-containing protein 1	NA	acetyltransferase activity	xylan acetylation	Golgi apparatus	XP_002169412.3 PREDICTED: probable O-acetyltransferase CAS1 [Hydra vulgaris]	9.3e-146	OG0001347	101	40	NA	NA	NA	NA	NA	NA
HyS0049.14	0	3.68418	0.904	0.005	0	Nematoblasts	12	nb_2	Aquaporin-3 Aquaglyceroporin-3	AQP9	channel activity	glycerol transport	integral component of membrane	XP_002156497.1 PREDICTED: aquaporin-9-like [Hydra vulgaris]	5.1e-106	OG0000824	138	42	NA	NA	NA	NA	NA	NA
HyS0049.35	0	1.33699	0.423	0.004	0	Nematoblasts	12	nb_2	NA	NA	NA	NA	NA	XP_012556646.1 PREDICTED: protein PFF0380w-like [Hydra vulgaris]	2e-40	OG0000808	140	27	NA	NA	NA	NA	NA	NA
HyS0049.46	0	1.34817	0.519	0.008	0	Nematoblasts	12	nb_2	O-aminophenol oxidase	MELC2	oxidoreductase activity	oxidation-reduction process	NA	XP_012559028.1 PREDICTED: uncharacterized protein LOC101239471 [Hydra vulgaris]	1.6e-194	OG0000720	153	21	NA	NA	NA	NA	NA	NA
HyS0052.10	0	2.38996	0.571	0.015	0	Nematoblasts	12	nb_2	Virginiamycin B lyase	NA	zinc ion binding	protein polyubiquitination	membrane	XP_002166147.2 PREDICTED: E3 ubiquitin-protein ligase TRIM71-like [Hydra vulgaris]	6.7e-217	OG0000009	1921	46	NA	NA	NA	NA	NA	NA
HyS0052.9	0	1.35847	0.513	0.005	0	Nematoblasts	12	nb_2	Sugar lactone lactonase YvrE	NA	zinc ion binding	protein polyubiquitination	integral component of membrane	XP_002166121.1 PREDICTED: E3 ubiquitin-protein ligase TRIM71-like [Hydra vulgaris]	4.6e-204	OG0000009	1921	46	NA	NA	NA	NA	NA	NA
HyS0056.109	0	2.45828	0.846	0.04	0	Nematoblasts	12	nb_2	Peptidase S74 domain-containing protein (Fragment)	NA	NA	NA	integral component of membrane	XP_012565555.1 PREDICTED: uncharacterized protein LOC101235783, partial [Hydra vulgaris]	4.4e-71	OG0015257	6	4	YES	YES	NA	NA	NA	NA
HyS0057.76	0	2.48172	0.846	0.008	0	Nematoblasts	12	nb_2	Large subunit ribosomal protein L7/L12	NA	structural constituent of ribosome	translation	ribosome	KRT84796.1 Thioredoxin, partial [Oryctes borbonicus]	7.4e-12	OG0007468	31	19	NA	NA	NA	NA	NA	NA
HyS0057.81	0	1.3002	0.442	0.002	0	Nematoblasts	12	nb_2	NA	NA	NA	NA	NA	NA	NA	OG0023711	3	2	YES	YES	YES	YES	YES	NA
HyS0058.21	0	2.03209	0.564	0.005	0	Nematoblasts	12	nb_2	Homeobox protein aristaless	ALX1	sequence-specific DNA binding	multicellular organism development	nucleus	XP_002168027.1 PREDICTED: aristaless-related homeobox protein-like [Hydra vulgaris]	6.2e-57	OG0000038	1037	47	NA	NA	NA	NA	NA	NA
HyS0058.35	0	1.76521	0.538	0.004	0	Nematoblasts	12	nb_2	NA	NA	NA	NA	NA	XP_012564630.1 PREDICTED: uncharacterized protein LOC100208040 [Hydra vulgaris]	2.8e-197	OG0009283	18	14	YES	NA	NA	NA	NA	NA
HyS0062.68	0	1.33298	0.519	0.003	0	Nematoblasts	12	nb_2	Tartrate-resistant acid phosphatase type 5	ACP5	acid phosphatase activity	dephosphorylation	lysosome	XP_012567061.1 PREDICTED: tartrate-resistant acid phosphatase type 5-like isoform X1 [Hydra vulgaris]	5.5e-119	OG0002051	76	34	NA	NA	NA	NA	NA	NA
HyS0072.11	0	3.73124	0.936	0.005	0	Nematoblasts	12	nb_2	Transcription factor jun-D	NA	DNA-binding transcription factor activity	regulation of transcription by RNA polymerase II	nucleus	XP_012567188.1 PREDICTED: uncharacterized protein LOC105851038 [Hydra vulgaris]	6.1e-87	OG0001591	90	44	NA	NA	NA	NA	NA	NA
HyS0078.9	4.1e-276	0.986265	0.391	0.011	9.04e-272	Nematoblasts	12	nb_2	NA	NA	NA	NA	NA	XP_004212321.1 PREDICTED: uncharacterized protein LOC101235028 [Hydra vulgaris]	2.6e-17	OG0012215	9	7	YES	YES	NA	NA	NA	NA
HyS0083.10	0	2.68358	0.808	0.007	0	Nematoblasts	12	nb_2	Zinc metalloprotease	NA	metalloendopeptidase activity	proteolysis	integral component of membrane	XP_002162254.1 PREDICTED: endothelin-converting enzyme 2-like [Hydra vulgaris]	0	OG0000072	655	46	NA	NA	NA	NA	NA	NA
HyS0087.32	0	1.69478	0.692	0.005	0	Nematoblasts	12	nb_2	Major facilitator superfamily domain-containing protein 6	MFSD6	NA	NA	integral component of membrane	XP_002160939.1 PREDICTED: major facilitator superfamily domain-containing protein 6-A-like [Hydra vulgaris]	4.2e-247	OG0000195	391	44	NA	NA	NA	NA	NA	NA
HyS0090.13	0	3.15575	0.891	0.022	0	Nematoblasts	12	nb_2	NA	NA	NA	NA	NA	XP_002162940.1 PREDICTED: uncharacterized protein LOC100200141 [Hydra vulgaris]	5.6e-45	OG0010702	13	12	YES	NA	NA	NA	NA	NA
HyS0093.20	0	4.23172	0.872	0.02	0	Nematoblasts	12	nb_2	NA	NA	NA	NA	NA	XP_012555677.1 PREDICTED: uncharacterized protein LOC100198516 isoform X1 [Hydra vulgaris]	8.4e-53	OG0011633	10	9	YES	NA	NA	NA	NA	NA
HyS0102.10	0	3.03837	0.91	0.008	0	Nematoblasts	12	nb_2	NA	NA	NA	NA	NA	NA	NA	OG0016494	5	4	YES	YES	YES	NA	NA	NA
HyS0104.15	0	2.7232	0.859	0.014	0	Nematoblasts	12	nb_2	NA	NA	NA	NA	NA	NA	NA	OG0023623	3	2	YES	YES	YES	YES	YES	NA
HyS0104.22	0	1.51125	0.583	0.002	0	Nematoblasts	12	nb_2	Zinc transporter	NA	cation transmembrane transporter activity	cation transmembrane transport	integral component of membrane	XP_002156517.1 PREDICTED: zinc homeostasis factor 1-like [Hydra vulgaris]	1.7e-105	OG0001187	110	45	NA	NA	NA	NA	NA	NA
HyS0106.7	0	2.14031	0.718	0.012	0	Nematoblasts	12	nb_2	Mucin TcMUCII	NA	chitin binding	chitin metabolic process	extracellular region	XP_012558854.1 PREDICTED: uncharacterized protein LOC100205557 [Hydra vulgaris]	0	OG0011214	11	9	YES	NA	NA	NA	NA	NA
HyS0108.2	0	1.97414	0.737	0.034	0	Nematoblasts	12	nb_2	FAT atypical cadherin 4	FAT4	calcium ion binding	Notch signaling pathway	plasma membrane	XP_012557017.1 PREDICTED: fibropellin-1-like, partial [Hydra vulgaris]	5.5e-81	OG0008373	24	2	YES	YES	YES	YES	YES	NA
HyS0109.29	0	2.09389	0.788	0.03	0	Nematoblasts	12	nb_2	methyltransferase-like protein 27	NA	methyltransferase activity	methylation	NA	XP_006817091.1 PREDICTED: Williams-Beuren syndrome chromosomal region 27 protein-like [Saccoglossus kowalevskii]	4.7e-10	OG0000362	253	29	NA	NA	NA	NA	NA	NA
HyS0109.37	0	1.90356	0.692	0.026	0	Nematoblasts	12	nb_2	Methyltransferase domain-containing protein	NA	methyltransferase activity	methylation	NA	XP_006817091.1 PREDICTED: Williams-Beuren syndrome chromosomal region 27 protein-like [Saccoglossus kowalevskii]	5.6e-20	OG0000362	253	29	NA	NA	NA	NA	NA	NA
HyS0122.14	0	3.50137	0.968	0.017	0	Nematoblasts	12	nb_2	NA	NA	NA	NA	NA	XP_012557208.1 PREDICTED: uncharacterized protein LOC100201718 [Hydra vulgaris]	6.7e-146	OG0008923	20	15	YES	NA	NA	NA	NA	NA
HyS0122.2	0	1.68847	0.603	0.005	0	Nematoblasts	12	nb_2	NA	NA	NA	NA	NA	NA	NA	OG0010200	14	12	YES	NA	NA	NA	NA	NA
HyS0153.13	0	1.68303	0.66	0.003	0	Nematoblasts	12	nb_2	Halomucin	NA	calcium ion binding	NA	integral component of membrane	XP_004208415.1 PREDICTED: uncharacterized protein LOC100215004 [Hydra vulgaris]	2e-191	OG0000721	153	19	NA	NA	NA	NA	NA	NA
HyS0155.9	0	2.19528	0.769	0.01	0	Nematoblasts	12	nb_2	Low choriolytic enzyme	NA	metalloendopeptidase activity	proteolysis	membrane	XP_012567159.1 PREDICTED: zinc metalloproteinase nas-8-like [Hydra vulgaris]	1.2e-63	OG0000004	2368	44	NA	NA	NA	NA	NA	NA
HyS0221.1	0	2.13738	0.699	0.019	0	Nematoblasts	12	nb_2	NA	NA	NA	NA	NA	XP_012557016.1 PREDICTED: protein eva-1 homolog C-like, partial [Hydra vulgaris]	5.7e-43	OG0008373	24	2	YES	YES	YES	YES	YES	NA
HyS0221.2	0	1.45887	0.571	0.006	0	Nematoblasts	12	nb_2	Fibropellin-1	NA	calcium ion binding	Notch signaling pathway	integral component of membrane	XP_012557017.1 PREDICTED: fibropellin-1-like, partial [Hydra vulgaris]	1e-28	OG0000023	1217	47	NA	NA	NA	NA	NA	NA
HyS0285.2	0	3.02057	0.897	0.009	0	Nematoblasts	12	nb_2	NA	NA	NA	NA	NA	NA	NA	OG0023570	3	2	YES	YES	YES	YES	YES	NA
HyS0320.10	0	0.848036	0.365	0.006	0	Nematoblasts	12	nb_2	NA	NA	NA	NA	NA	NA	NA	OG0016509	5	4	YES	YES	YES	NA	NA	NA
HyS1667.3	0	1.56396	0.545	0.003	0	Nematoblasts	12	nb_2	Serine incorporator 3	SERINC3	NA	phosphatidylserine metabolic process	Golgi apparatus	XP_012565576.1 PREDICTED: probable serine incorporator [Hydra vulgaris]	1.5e-211	OG0000601	173	49	NA	NA	NA	NA	NA	NA
HyS0001.363	0	6.04084	0.459	0.008	0	Epithelial Cells	13	ecEp_1	X-linked retinitis pigmentosa GTPase regulator	NA	peptide-aspartate beta-dioxygenase activity	peptidyl-aspartic acid hydroxylation	integral component of membrane	NA	NA	OG0030713	2	2	YES	YES	YES	YES	YES	NA
HyS0001.586	0	2.8326	0.425	0.001	0	Epithelial Cells	13	ecEp_1	A disintegrin and metalloproteinase with thrombospondin motifs 12	NA	sterol binding	sterol transport	extracellular region	XP_027042190.1 ectin-like isoform X2 [Pocillopora damicornis]	4.5e-25	OG0000074	641	44	NA	NA	NA	NA	NA	NA
HyS0002.220	3.92e-249	1.60499	0.363	0.01	8.65e-245	Epithelial Cells	13	ecEp_1	NA	NA	NA	NA	NA	XP_002155428.2 PREDICTED: synaptotagmin-17-like isoform X2 [Hydra vulgaris]	8.1e-57	OG0016460	5	4	YES	YES	YES	NA	NA	NA
HyS0002.379	0	1.74117	0.336	0.003	0	Epithelial Cells	13	ecEp_1	Alpha-galactosidase	NA	actin binding	actomyosin structure organization	mismatch repair complex	XP_002164309.1 PREDICTED: myophilin-like [Hydra vulgaris]	2e-77	OG0000338	272	49	NA	NA	NA	NA	NA	NA
HyS0003.278	0	1.61902	0.274	0.002	0	Epithelial Cells	13	ecEp_1	NA	NA	NA	NA	NA	NA	NA	OG0018208	4	4	YES	YES	NA	NA	NA	NA
HyS0004.105	0	1.96902	0.39	0.001	0	Epithelial Cells	13	ecEp_1	Hematopoietic prostaglandin D synthase	NA	NA	NA	NA	XP_002162176.1 PREDICTED: glutathione S-transferase-like [Hydra vulgaris]	3.4e-19	OG0000129	502	48	NA	NA	NA	NA	NA	NA
HyS0004.233	0	3.67143	0.253	0.001	0	Epithelial Cells	13	ecEp_1	Calponin homology domain-containing	NA	chitin binding	chitin metabolic process	extracellular region	XP_001638232.1 predicted protein [Nematostella vectensis]	1.5e-43	OG0004141	54	16	NA	NA	NA	NA	NA	NA
HyS0005.263	0	1.82375	0.308	0.002	0	Epithelial Cells	13	ecEp_1	Gamma-aminobutyric acid type B receptor subunit 1 (Fragment)	NA	G protein-coupled GABA receptor activity	G protein-coupled receptor signaling pathway	integral component of membrane	XP_012556198.1 PREDICTED: gamma-aminobutyric acid type B receptor subunit 1-like isoform X1 [Hydra vulgaris]	2.9e-152	OG0000113	535	42	NA	NA	NA	NA	NA	NA
HyS0010.42	1.12e-269	1.51756	0.288	0.005	2.46e-265	Epithelial Cells	13	ecEp_1	Adhesion G protein-coupled receptor D1	ADGRD1	G protein-coupled receptor activity	cell surface receptor signaling pathway	integral component of membrane	XP_012559391.1 PREDICTED: probable G-protein coupled receptor 133 [Hydra vulgaris]	2e-88	OG0000026	1183	45	NA	NA	NA	NA	NA	NA
HyS0011.24	0	1.21894	0.295	0.001	0	Epithelial Cells	13	ecEp_1	Homeodomain transcription factor	NA	sequence-specific DNA binding	regulation of transcription, DNA-templated	nucleus	ACM62735.1 Hox9-14C homeodomain transcription factor protein [Clytia hemisphaerica]	1.6e-67	OG0000008	2065	44	NA	NA	NA	NA	NA	NA
HyS0012.161	0	3.13474	0.329	0.005	0	Epithelial Cells	13	ecEp_1	Meprin A subunit alpha	NA	metalloendopeptidase activity	proteolysis	meprin A complex	KTF97921.1 hypothetical protein cypCar_00004434 [Cyprinus carpio]	2.7e-58	OG0000004	2368	44	NA	NA	NA	NA	NA	NA
HyS0012.189	0	2.46769	0.308	0.001	0	Epithelial Cells	13	ecEp_1	NA	NA	NA	NA	NA	NA	NA	Unassigned	NA	NA	NA	NA	NA	NA	NA	NA
HyS0012.285	0	2.16302	0.322	0.001	0	Epithelial Cells	13	ecEp_1	NA	NA	NA	NA	NA	PFX21600.1 hypothetical protein AWC38_SpisGene13930 [Stylophora pistillata]	2.5e-12	OG0002064	76	20	NA	NA	NA	NA	NA	NA
HyS0014.65	4.1e-209	1.80249	0.37	0.014	9.04e-205	Epithelial Cells	13	ecEp_1	Latent transforming growth factor beta binding protein 1	LTBP1	calcium ion binding	sequestering of TGFbeta in extracellular matrix	microfibril	XP_027038922.1 uncharacterized protein LOC113667311 [Pocillopora damicornis]	1.2e-97	OG0000105	555	43	NA	NA	NA	NA	NA	NA
HyS0014.7	0	3.82218	0.308	0.002	0	Epithelial Cells	13	ecEp_1	Hemagglutinin/amebocyte aggregation factor	NA	NA	collagen fibril organization	nematocyst	NP_001038304.2 uncharacterized protein LOC557741 precursor [Danio rerio]	1.7e-35	OG0001541	92	14	NA	NA	NA	NA	NA	NA
HyS0022.29	0	5.14016	0.466	0.01	0	Epithelial Cells	13	ecEp_1	L-rhamnose-binding lectin	NA	carbohydrate binding	chitin metabolic process	extracellular region	XP_002157192.2 PREDICTED: uncharacterized protein LOC100205717 [Hydra vulgaris]	1.5e-81	OG0000200	384	37	NA	NA	NA	NA	NA	NA
HyS0023.101	0	0.780047	0.26	0.002	0	Epithelial Cells	13	ecEp_1	NA	NA	NA	NA	NA	NA	NA	OG0031640	2	2	YES	YES	YES	YES	YES	NA
HyS0023.29	0	3.20976	0.253	0.002	0	Epithelial Cells	13	ecEp_1	hemagglutinin/amebocyte aggregation factor-like	NA	NA	NA	NA	XP_018419433.1 PREDICTED: hemagglutinin/amebocyte aggregation factor-like [Nanorana parkeri]	4.1e-27	OG0001541	92	14	NA	NA	NA	NA	NA	NA
HyS0023.297	0	2.03872	0.349	0.004	0	Epithelial Cells	13	ecEp_1	NA	NA	NA	NA	NA	AKU77030.1 332-1 secreted propeptide [Malo kingi]	3.9e-21	OG0000696	157	16	NA	NA	NA	NA	NA	NA
HyS0024.60	0	1.99578	0.425	0.002	0	Epithelial Cells	13	ecEp_1	Chitin syntthase class B	NA	transferase activity, transferring hexosyl groups	histone acetylation	cell septum	XP_004207525.2 PREDICTED: uncharacterized protein LOC100212386 [Hydra vulgaris]	0	OG0000735	150	37	NA	NA	NA	NA	NA	NA
HyS0025.73	0	2.70018	0.281	0.001	0	Epithelial Cells	13	ecEp_1	NA	NA	NA	NA	NA	XP_019632388.1 PREDICTED: uncharacterized protein LOC109476018 [Branchiostoma belcheri]	5e-05	OG0023681	3	2	YES	YES	YES	YES	YES	NA
HyS0028.224	1.29e-268	2.61042	0.37	0.01	2.85e-264	Epithelial Cells	13	ecEp_1	Glutathione S transferase	NA	transferase activity	NA	NA	XP_002163429.1 PREDICTED: S-crystallin 4-like [Hydra vulgaris]	3.6e-37	OG0000129	502	48	NA	NA	NA	NA	NA	NA
HyS0033.20	0	2.3005	0.418	0.005	0	Epithelial Cells	13	ecEp_1	NA	NA	NA	NA	NA	NA	NA	OG0012138	9	7	NA	NA	NA	NA	NA	NA
HyS0033.215	8.73e-242	1.71596	0.281	0.005	1.92e-237	Epithelial Cells	13	ecEp_1	NA	NA	NA	NA	NA	XP_002167329.2 PREDICTED: uncharacterized protein LOC100215052 [Hydra vulgaris]	1.7e-09	OG0011224	11	9	YES	NA	NA	NA	NA	NA
HyS0034.83	0	1.99068	0.452	0.007	0	Epithelial Cells	13	ecEp_1	NA	NA	NA	NA	NA	NA	NA	OG0030864	2	2	YES	YES	YES	YES	YES	NA
HyS0037.156	0	1.22432	0.308	0.001	0	Epithelial Cells	13	ecEp_1	NA	NA	NA	NA	NA	XP_012554119.1 PREDICTED: uncharacterized protein LOC101239543 isoform X1 [Hydra vulgaris]	3.4e-18	OG0018670	4	4	YES	YES	YES	NA	NA	NA
HyS0040.106	2.24e-229	4.80626	0.26	0.005	4.94e-225	Epithelial Cells	13	ecEp_1	NA	NA	NA	NA	NA	NA	NA	OG0031151	2	2	YES	YES	YES	YES	YES	NA
HyS0040.176	1.02e-227	4.7065	0.295	0.007	2.25e-223	Epithelial Cells	13	ecEp_1	DNA-directed RNA polymerase subunit beta	NA	DNA-directed 5'-3' RNA polymerase activity	transcription, DNA-templated	NA	XP_015769605.1 PREDICTED: uncharacterized protein LOC107348110 [Acropora digitifera]	1.4e-47	OG0007802	28	7	NA	NA	NA	NA	NA	NA
HyS0046.22	0	2.03095	0.39	0.003	0	Epithelial Cells	13	ecEp_1	NA	NA	NA	NA	NA	NP_001296677.1 uncharacterized LOC100210581 [Hydra vulgaris]	1.3e-12	OG0031464	2	2	YES	YES	YES	YES	YES	NA
HyS0051.150	1.51e-291	2.03133	0.397	0.01	3.32e-287	Epithelial Cells	13	ecEp_1	NA	NA	NA	NA	NA	NA	NA	OG0014981	6	3	YES	YES	YES	YES	NA	NA
HyS0051.38	0	2.21768	0.568	0.006	0	Epithelial Cells	13	ecEp_1	Tubulin alpha chain	NA	structural constituent of cytoskeleton	microtubule-based process	microtubule	Q91060.1 RecName: Full=Tubulin alpha chain; Contains: RecName: Full=Detyrosinated tubulin alpha chain	4e-243	OG0000147	467	49	NA	NA	NA	NA	NA	NA
HyS0052.58	1.42e-289	1.24836	0.349	0.007	3.14e-285	Epithelial Cells	13	ecEp_1	NA	NA	NA	NA	NA	NA	NA	OG0015271	6	3	YES	YES	YES	NA	NA	NA
HyS0055.130	1.61e-242	1.42043	0.295	0.006	3.54e-238	Epithelial Cells	13	ecEp_1	Thyrotroph embryonic factor	NA	DNA-binding transcription factor activity	regulation of transcription by RNA polymerase II	nucleus	XP_012562208.1 PREDICTED: thyrotroph embryonic factor-like isoform X2 [Hydra vulgaris]	2e-08	OG0018650	4	4	YES	YES	YES	NA	NA	NA
HyS0061.38	1.06e-279	1.86518	0.288	0.004	2.33e-275	Epithelial Cells	13	ecEp_1	NA	NA	NA	NA	NA	NA	NA	Unassigned	NA	NA	NA	NA	NA	NA	NA	NA
HyS0065.36	5.55e-226	1.65076	0.425	0.017	1.22e-221	Epithelial Cells	13	ecEp_1	Innexin	NA	NA	ion transport	gap junction	CRX73271.1 Innexin 3 [Hydra vulgaris]	2.4e-79	OG0001165	112	6	NA	NA	NA	NA	NA	NA
HyS0103.12	0	1.35448	0.288	0.001	0	Epithelial Cells	13	ecEp_1	NA	NA	NA	NA	NA	NA	NA	OG0031559	2	2	YES	YES	YES	YES	YES	NA
HyS0103.16	7.74e-241	1.56137	0.253	0.004	1.71e-236	Epithelial Cells	13	ecEp_1	Secreted frizzled-related protein 4	NA	NA	Wnt signaling pathway	extracellular region	XP_012556435.1 PREDICTED: secreted frizzled-related protein 3-like [Hydra vulgaris]	4.8e-44	OG0000188	403	42	NA	NA	NA	NA	NA	NA
HyS0103.9	0	1.39733	0.267	0	0	Epithelial Cells	13	ecEp_1	NA	NA	NA	NA	NA	NA	NA	OG0023684	3	2	YES	YES	YES	YES	YES	NA
HyS0109.12	0	3.11763	0.308	0.002	0	Epithelial Cells	13	ecEp_1	DNA-directed RNA polymerase subunit beta	NA	DNA-directed 5'-3' RNA polymerase activity	transcription, DNA-templated	NA	XP_020621695.1 uncharacterized protein LOC110059345 [Orbicella faveolata]	6.3e-49	OG0007802	28	7	NA	NA	NA	NA	NA	NA
HyS0835.2	1.04e-290	1.59818	0.274	0.004	2.29e-286	Epithelial Cells	13	ecEp_1	NA	NA	NA	NA	NA	AKU77030.1 332-1 secreted propeptide [Malo kingi]	1.8e-21	OG0000696	157	16	NA	NA	NA	NA	NA	NA
HyS2276.1	5.7e-295	1.08766	0.342	0.007	1.26e-290	Epithelial Cells	13	ecEp_1	NA	NA	NA	NA	NA	XP_012555685.1 PREDICTED: uncharacterized protein LOC105844076 [Hydra vulgaris]	3.4e-29	OG0016423	5	4	YES	YES	YES	NA	NA	NA
HyS0001.177	0	2.21217	0.521	0.001	0	Epithelial Cells	14	ecEp_2	NA	NA	NA	NA	NA	XP_022790447.1 CD151 antigen-like [Stylophora pistillata]	1.4e-24	OG0000051	909	44	NA	NA	NA	NA	NA	NA
HyS0001.641	0	1.36095	0.347	0.003	0	Epithelial Cells	14	ecEp_2	Neutral endopeptidase	ECE1	metalloendopeptidase activity	proteolysis	integral component of membrane	XP_022085468.1 endothelin-converting enzyme homolog isoform X5 [Acanthaster planci]	2e-115	OG0000072	655	46	NA	NA	NA	NA	NA	NA
HyS0001.700	0	4.95362	0.835	0.031	0	Epithelial Cells	14	ecEp_2	NA	NA	NA	NA	NA	NA	NA	Unassigned	NA	NA	NA	NA	NA	NA	NA	NA
HyS0002.439	0	4.07129	0.545	0.005	0	Epithelial Cells	14	ecEp_2	Double oxidase: two peroxidase domains	NA	peroxidase activity	response to oxidative stress	integral component of membrane	RMX53663.1 hypothetical protein pdam_00000448 [Pocillopora damicornis]	2.5e-104	OG0000151	449	43	NA	NA	NA	NA	NA	NA
HyS0002.495	0	2.13306	0.38	0.007	0	Epithelial Cells	14	ecEp_2	NA	NA	NA	NA	NA	XP_011686120.1 PREDICTED: uncharacterized protein LOC105448935 isoform X1 [Wasmannia auropunctata]	3.4e-39	OG0001016	122	9	NA	NA	NA	NA	NA	NA
HyS0002.498	0	2.74324	0.479	0.007	0	Epithelial Cells	14	ecEp_2	NA	NA	NA	NA	NA	NA	NA	Unassigned	NA	NA	NA	NA	NA	NA	NA	NA
HyS0004.254	0	1.49085	0.281	0.002	0	Epithelial Cells	14	ecEp_2	NA	NA	NA	NA	NA	XP_020606154.1 sushi, von Willebrand factor type A, EGF and pentraxin domain-containing protein 1-like [Orbicella faveolata]	2.5e-14	OG0008600	22	9	NA	NA	NA	NA	NA	NA
HyS0006.47	0	1.80705	0.298	0.001	0	Epithelial Cells	14	ecEp_2	Membrane protein involved in the export of O-antigen and teichoic acid	LOC108276941	G protein-coupled receptor activity	cell surface receptor signaling pathway	extracellular region	KMQ87653.1 integrase core domain protein [Lasius niger]	7.7e-11	OG0019775	4	2	YES	YES	YES	YES	YES	NA
HyS0006.48	0	1.27151	0.281	0.001	0	Epithelial Cells	14	ecEp_2	NA	NA	NA	NA	NA	XP_028397388.1 uncharacterized protein LOC114521172 [Dendronephthya gigantea]	1.7e-52	OG0009175	19	5	NA	NA	NA	NA	NA	NA
HyS0007.137	0	5.65923	0.802	0.029	0	Epithelial Cells	14	ecEp_2	NA	NA	NA	NA	NA	NA	NA	Unassigned	NA	NA	NA	NA	NA	NA	NA	NA
HyS0007.144	0	5.88593	0.851	0.029	0	Epithelial Cells	14	ecEp_2	NA	NA	NA	NA	NA	NA	NA	Unassigned	NA	NA	NA	NA	NA	NA	NA	NA
HyS0007.219	0	2.14584	0.512	0.01	0	Epithelial Cells	14	ecEp_2	NA	NA	NA	NA	NA	NA	NA	OG0030662	2	2	YES	YES	YES	YES	YES	NA
HyS0007.341	0	1.8352	0.364	0.005	0	Epithelial Cells	14	ecEp_2	N-acetyl-beta-glucosaminyl-glycoprotein 4-beta-N-acetylgalactosaminyltransferase 1	B4GALNT4	N-acetyl-beta-glucosaminyl-glycoprotein 4-beta-N-acetylgalactosaminyltransferase activity	NA	Golgi cisterna membrane	XP_012566940.1 PREDICTED: N-acetyl-beta-glucosaminyl-glycoprotein 4-beta-N-acetylgalactosaminyltransferase 1-like [Hydra vulgaris]	5.7e-273	OG0000369	249	25	NA	NA	NA	NA	NA	NA
HyS0007.74	0	2.66811	0.587	0.013	0	Epithelial Cells	14	ecEp_2	NA	NA	NA	NA	NA	RMX51064.1 hypothetical protein pdam_00018899, partial [Pocillopora damicornis]	3.9e-21	OG0001320	102	23	NA	NA	NA	NA	NA	NA
HyS0009.170	0	1.14112	0.273	0.002	0	Epithelial Cells	14	ecEp_2	NA	NA	NA	NA	NA	NA	NA	OG0030905	2	2	YES	YES	YES	YES	YES	NA
HyS0009.203	0	1.47382	0.298	0.001	0	Epithelial Cells	14	ecEp_2	Complement factor properdin	NA	calcium ion binding	negative regulation of angiogenesis	integral component of membrane	XP_002157812.1 PREDICTED: SCO-spondin-like, partial [Hydra vulgaris]	5.8e-161	OG0004910	50	6	NA	NA	NA	NA	NA	NA
HyS0009.21	0	1.57497	0.256	0.001	0	Epithelial Cells	14	ecEp_2	NA	NA	NA	NA	NA	BAA81716.3 protein tyrosine kinase [Ephydatia fluviatilis]	5.7e-17	OG0000154	444	35	NA	NA	NA	NA	NA	NA
HyS0009.310	0	1.38705	0.298	0.002	0	Epithelial Cells	14	ecEp_2	NA	NA	NA	NA	NA	KXJ08513.1 Fibrillin-1 [Exaiptasia pallida]	7.1e-67	OG0000902	131	11	NA	NA	NA	NA	NA	NA
HyS0010.17	1.99e-237	3.29717	0.579	0.029	4.39e-233	Epithelial Cells	14	ecEp_2	Tropomyosin	NA	actin filament binding	actin filament organization	actin filament	XP_012560521.1 PREDICTED: tropomyosin-1-like [Hydra vulgaris]	1.1e-24	OG0004861	50	23	NA	NA	NA	NA	NA	NA
HyS0010.282	7.8e-306	3.91189	0.421	0.009	1.72e-301	Epithelial Cells	14	ecEp_2	NA	NA	NA	NA	NA	NA	NA	OG0031262	2	2	YES	YES	YES	YES	YES	NA
HyS0011.136	5.61e-246	3.32234	0.405	0.012	1.24e-241	Epithelial Cells	14	ecEp_2	NA	NA	NA	NA	NA	NA	NA	Unassigned	NA	NA	NA	NA	NA	NA	NA	NA
HyS0011.233	0	1.69915	0.372	0.002	0	Epithelial Cells	14	ecEp_2	Ubiquitin carboxyl-terminal hydrolase CYLD	NA	protein kinase activity	protein phosphorylation	GPI-anchor transamidase complex	XP_002158256.2 PREDICTED: probable serine/threonine-protein kinase DDB_G0271682 [Hydra vulgaris]	7.2e-82	OG0000576	178	17	NA	NA	NA	NA	NA	NA
HyS0011.263	2.94e-231	1.69751	0.322	0.007	6.49e-227	Epithelial Cells	14	ecEp_2	NADPH oxidase 4	NOX4	superoxide-generating NADPH oxidase activity	superoxide anion generation	integral component of membrane	XP_002157259.3 PREDICTED: NADPH oxidase 4-like isoform X1 [Hydra vulgaris]	1.4e-221	OG0000782	143	40	NA	NA	NA	NA	NA	NA
HyS0012.13	0	1.24897	0.306	0.002	0	Epithelial Cells	14	ecEp_2	NA	NA	NA	NA	NA	XP_012553941.1 PREDICTED: putative uncharacterized protein DDB_G0282499 [Hydra vulgaris]	2.1e-48	OG0012803	8	8	YES	YES	NA	NA	NA	NA
HyS0014.117	0	1.39967	0.372	0.001	0	Epithelial Cells	14	ecEp_2	NA	NA	NA	NA	NA	NA	NA	OG0014507	6	6	YES	YES	NA	NA	NA	NA
HyS0014.278	0	1.37058	0.264	0.001	0	Epithelial Cells	14	ecEp_2	NA	NA	NA	NA	NA	XP_002157975.2 PREDICTED: golgin subfamily A member 6-like protein 22 [Hydra vulgaris]	9.3e-07	OG0013894	7	4	YES	YES	YES	NA	NA	NA
HyS0017.250	0	3.38769	0.62	0.008	0	Epithelial Cells	14	ecEp_2	Neurofilament triplet protein m	NA	NA	NA	NA	NA	NA	OG0030919	2	2	YES	YES	YES	YES	YES	NA
HyS0017.265	1.4e-215	2.0519	0.455	0.018	3.09e-211	Epithelial Cells	14	ecEp_2	Brain-specific angiogenesis inhibitor 1	NA	calcium ion binding	negative regulation of angiogenesis	integral component of membrane	XP_011444033.1 PREDICTED: SCO-spondin isoform X1 [Crassostrea gigas]	4.5e-189	OG0000024	1202	47	NA	NA	NA	NA	NA	NA
HyS0018.80	1.32e-213	3.38851	0.521	0.025	2.91e-209	Epithelial Cells	14	ecEp_2	Aminotransferase class V-fold PLP-dependent enzyme	NA	transaminase activity	NA	integral component of membrane	XP_019646573.1 PREDICTED: uncharacterized protein LOC109487062 [Branchiostoma belcheri]	1e-149	OG0001305	103	36	NA	NA	NA	NA	NA	NA
HyS0024.144	0	4.24344	0.694	0.003	0	Epithelial Cells	14	ecEp_2	NA	NA	NA	NA	NA	AEO12553.1 Lefftyrin, partial [Oscarella pearsei]	0	OG0000016	1416	45	NA	NA	NA	NA	NA	NA
HyS0026.159	0	2.25999	0.471	0.007	0	Epithelial Cells	14	ecEp_2	NA	NA	NA	NA	NA	XP_012563164.1 PREDICTED: uncharacterized protein LOC105847879 [Hydra vulgaris]	1.4e-34	OG0010102	15	5	YES	YES	NA	NA	NA	NA
HyS0026.177	0	1.24504	0.306	0.003	0	Epithelial Cells	14	ecEp_2	Ammonium transporter Rh type B-B	RHCG	ammonium transmembrane transporter activity	ammonium transmembrane transport	apical plasma membrane	XP_002167946.3 PREDICTED: ammonium transporter Rh type A-like [Hydra vulgaris]	4.7e-140	OG0000842	136	47	NA	NA	NA	NA	NA	NA
HyS0030.200	0	2.03127	0.306	0.004	0	Epithelial Cells	14	ecEp_2	ETS domain-containing protein	NA	sequence-specific DNA binding	regulation of transcription, DNA-templated	nucleus	XP_012555638.1 PREDICTED: ETS domain-containing protein Elk-3-like [Hydra vulgaris]	1.1e-15	OG0018770	4	3	YES	YES	YES	YES	NA	NA
HyS0031.157	0	2.39188	0.446	0.002	0	Epithelial Cells	14	ecEp_2	NA	NA	NA	NA	NA	NA	NA	OG0031027	2	2	YES	YES	YES	YES	YES	NA
HyS0033.219	0	2.79129	0.488	0.01	0	Epithelial Cells	14	ecEp_2	Latent transforming growth factor beta binding protein 2	NA	calcium ion binding	chitin metabolic process	extracellular region	RDD39041.1 Mucin-like protein, partial [Trichoplax sp. H2]	2e-91	OG0000152	446	40	NA	NA	NA	NA	NA	NA
HyS0033.82	0	1.998	0.397	0.002	0	Epithelial Cells	14	ecEp_2	Lecithin:retinol acyltransferase	NA	transferase activity, transferring acyl groups	NA	NA	XP_003229593.1 PREDICTED: retinoic acid receptor responder protein 3 [Anolis carolinensis]	4.3e-17	OG0000942	127	26	NA	NA	NA	NA	NA	NA
HyS0034.84	3.7e-254	1.53381	0.314	0.006	8.14e-250	Epithelial Cells	14	ecEp_2	NA	NA	NA	NA	NA	NA	NA	OG0030865	2	2	YES	YES	YES	YES	YES	NA
HyS0034.94	1.86e-239	2.98286	0.438	0.014	4.09e-235	Epithelial Cells	14	ecEp_2	Ga-binding protein alpha subunit	NA	sequence-specific DNA binding	regulation of transcription, DNA-templated	nucleus	KPM11465.1 ETS-like protein [Sarcoptes scabiei]	1.9e-13	OG0000089	597	44	NA	NA	NA	NA	NA	NA
HyS0035.125	0	2.82867	0.471	0.006	0	Epithelial Cells	14	ecEp_2	NA	NA	NA	NA	NA	XP_012559289.1 PREDICTED: uncharacterized protein LOC105845745 [Hydra vulgaris]	5.7e-52	OG0010568	13	9	NA	NA	NA	NA	NA	NA
HyS0035.154	0	2.34743	0.43	0.008	0	Epithelial Cells	14	ecEp_2	Gamma-aminobutyric acid type B receptor subunit	GABBR2	G protein-coupled GABA receptor activity	G protein-coupled receptor signaling pathway	G protein-coupled receptor heterodimeric complex	XP_012555926.1 PREDICTED: gamma-aminobutyric acid type B receptor subunit 2-like [Hydra vulgaris]	3.1e-121	OG0000113	535	42	NA	NA	NA	NA	NA	NA
HyS0037.71	0	2.20102	0.397	0.005	0	Epithelial Cells	14	ecEp_2	NA	NA	NA	NA	NA	XP_012563175.1 PREDICTED: uncharacterized protein LOC100201986 [Hydra vulgaris]	1.2e-05	OG0014099	7	2	YES	YES	YES	YES	YES	NA
HyS0040.36	3.58e-236	1.52016	0.339	0.008	7.89e-232	Epithelial Cells	14	ecEp_2	NA	NA	NA	NA	NA	AEA86515.1 spherulin [Astrosclera willeyana]	9.7e-60	OG0012753	8	3	NA	NA	NA	NA	NA	NA
HyS0042.169	0	2.00244	0.471	0.001	0	Epithelial Cells	14	ecEp_2	Outer membrane protein OmpA	SUSD2	calcium ion binding	immune response	cell outer membrane	TFG50771.1 hypothetical protein E4H40_00575 [Candidatus Brocadiae bacterium]	1.2e-14	OG0010009	15	5	YES	YES	NA	NA	NA	NA
HyS0042.24	2.03e-236	2.95064	0.471	0.017	4.47e-232	Epithelial Cells	14	ecEp_2	Metalloendopeptidase	NA	metalloendopeptidase activity	proteolysis	extracellular space	KYN35697.1 Low choriolytic enzyme [Trachymyrmex septentrionalis]	1.1e-36	OG0000004	2368	44	NA	NA	NA	NA	NA	NA
HyS0043.49	0	3.18455	0.512	0.011	0	Epithelial Cells	14	ecEp_2	NA	NA	NA	NA	NA	AFC34081.1 aquaporin-1 variant A [Chilo suppressalis]	1.8e-31	OG0000302	293	45	NA	NA	NA	NA	NA	NA
HyS0044.48	0	4.36163	0.669	0.015	0	Epithelial Cells	14	ecEp_2	NA	NA	NA	NA	NA	XP_012566745.1 PREDICTED: probable glutamate receptor [Hydra vulgaris]	3.9e-34	OG0000839	137	19	NA	NA	NA	NA	NA	NA
HyS0050.30	0	1.65185	0.264	0.001	0	Epithelial Cells	14	ecEp_2	Ankyrin repeat and SOCS box protein 8	NA	ion channel activity	ion transmembrane transport	integral component of membrane	XP_012556242.1 PREDICTED: uncharacterized protein LOC100208925 [Hydra vulgaris]	6.8e-202	OG0000384	241	30	NA	NA	NA	NA	NA	NA
HyS0055.3	0	1.37988	0.256	0.002	0	Epithelial Cells	14	ecEp_2	Tubulin alpha chain	NA	structural constituent of cytoskeleton	microtubule-based process	microtubule	XP_008282523.1 PREDICTED: tubulin alpha chain-like [Stegastes partitus]	5.9e-247	OG0000147	467	49	NA	NA	NA	NA	NA	NA
HyS0058.33	2.56e-303	2.05436	0.264	0.002	5.63e-299	Epithelial Cells	14	ecEp_2	NA	NA	NA	NA	NA	NA	NA	OG0013863	7	4	YES	YES	YES	NA	NA	NA
HyS0059.48	0	2.10282	0.438	0.003	0	Epithelial Cells	14	ecEp_2	NA	NA	NA	NA	NA	XP_002166874.2 PREDICTED: fibrillin-2-like isoform X1 [Hydra vulgaris]	1.1e-13	OG0010365	14	4	YES	YES	YES	NA	NA	NA
HyS0059.49	0	1.594	0.322	0.002	0	Epithelial Cells	14	ecEp_2	Latent transforming growth factor beta binding protein 3	NID1	calcium ion binding	cell-matrix adhesion	extracellular matrix	XP_002166874.2 PREDICTED: fibrillin-2-like isoform X1 [Hydra vulgaris]	1.7e-13	OG0010365	14	4	YES	YES	YES	NA	NA	NA
HyS0060.12	0	2.26218	0.397	0.007	0	Epithelial Cells	14	ecEp_2	NA	NA	NA	NA	NA	NA	NA	OG0030880	2	2	YES	YES	YES	YES	YES	NA
HyS0060.49	1.79e-257	1.39133	0.298	0.005	3.95e-253	Epithelial Cells	14	ecEp_2	Receptor-type tyrosine-protein phosphatase delta	PTPRF	protein tyrosine phosphatase activity	peptidyl-tyrosine dephosphorylation	integral component of membrane	XP_012556381.1 PREDICTED: receptor-type tyrosine-protein phosphatase delta-like isoform X1 [Hydra vulgaris]	4e-260	OG0000020	1291	49	NA	NA	NA	NA	NA	NA
HyS0061.65	0	3.7211	0.669	0.015	0	Epithelial Cells	14	ecEp_2	Thrombospondin type 1 domain-containing protein,putative	NA	calcium ion binding	homophilic cell adhesion via plasma membrane adhesion molecules	integral component of membrane	XP_026689791.1 thrombospondin type-1 domain-containing protein 7A-like isoform X4 [Ciona intestinalis]	7.1e-30	OG0001537	92	23	NA	NA	NA	NA	NA	NA
HyS0063.77	0	2.03483	0.289	0.001	0	Epithelial Cells	14	ecEp_2	Serine protease pic autotransporter	NA	metalloendopeptidase activity	proteolysis	extracellular region	XP_020618995.1 blastula protease 10-like isoform X1 [Orbicella faveolata]	8.5e-39	OG0000004	2368	44	NA	NA	NA	NA	NA	NA
HyS0070.57	0	1.31572	0.289	0.002	0	Epithelial Cells	14	ecEp_2	NA	NA	NA	NA	NA	NA	NA	OG0031134	2	2	YES	YES	YES	YES	YES	NA
HyS0070.69	6.56e-224	2.84072	0.579	0.031	1.45e-219	Epithelial Cells	14	ecEp_2	Gelsolin	NA	actin filament binding	actin filament severing	cytoskeleton	XP_012559373.1 PREDICTED: gelsolin-like protein 1 [Hydra vulgaris]	4.5e-157	OG0000283	305	48	NA	NA	NA	NA	NA	NA
HyS0071.62	0	2.206	0.537	0.003	0	Epithelial Cells	14	ecEp_2	Platelet glycoprotein Ib alpha chain	CLEC-199	carbohydrate binding	aminoglycan metabolic process	intrinsic component of membrane	NA	NA	OG0022043	3	3	YES	YES	YES	YES	NA	NA
HyS0085.19	0	1.64828	0.322	0.003	0	Epithelial Cells	14	ecEp_2	NA	NA	NA	NA	NA	XP_022800134.1 LOW QUALITY PROTEIN: tyrosine-protein phosphatase Lar-like, partial [Stylophora pistillata]	4.8e-81	OG0010375	14	7	NA	NA	NA	NA	NA	NA
HyS0101.20	0	2.42462	0.455	0.006	0	Epithelial Cells	14	ecEp_2	NA	NA	NA	NA	NA	XP_012564436.1 PREDICTED: uncharacterized protein LOC105848775 [Hydra vulgaris]	2.9e-11	OG0006437	40	6	NA	NA	NA	NA	NA	NA
HyS0105.22	0	2.03692	0.446	0.003	0	Epithelial Cells	14	ecEp_2	Alpha-protein kinase vwkA	NA	protein serine/threonine kinase activity	protein phosphorylation	contractile vacuolar membrane	XP_022097593.1 alpha-protein kinase vwkA-like [Acanthaster planci]	7.6e-18	OG0000241	339	44	NA	NA	NA	NA	NA	NA
HyS0105.8	0	1.13925	0.314	0.001	0	Epithelial Cells	14	ecEp_2	NA	NA	NA	NA	NA	NA	NA	OG0003111	61	13	YES	NA	NA	NA	NA	NA
HyS0129.16	3.41e-226	2.34996	0.339	0.008	7.51e-222	Epithelial Cells	14	ecEp_2	NA	NA	NA	NA	NA	XP_015780019.1 PREDICTED: uncharacterized protein LOC107357901 [Acropora digitifera]	2.4e-13	OG0007609	30	2	YES	YES	YES	YES	YES	NA
HyS0139.4	0	1.26487	0.322	0	0	Epithelial Cells	14	ecEp_2	NA	NA	NA	NA	NA	NA	NA	OG0008852	21	2	YES	YES	YES	YES	YES	NA
HyS0139.9	0	0.937814	0.264	0.001	0	Epithelial Cells	14	ecEp_2	NA	NA	NA	NA	NA	NA	NA	OG0008852	21	2	YES	YES	YES	YES	YES	NA
HyS4758.1	0	1.58836	0.397	0.004	0	Epithelial Cells	14	ecEp_2	NA	NA	NA	NA	NA	NA	NA	OG0030792	2	2	YES	YES	YES	YES	YES	NA
HyS4781.1	0	4.85424	0.694	0.016	0	Epithelial Cells	14	ecEp_2	NA	NA	NA	NA	NA	NA	NA	OG0010370	14	3	YES	YES	YES	YES	NA	NA
HyS0001.271	0	1.77228	0.533	0.001	0	Gland Cells	15	Zgc	NA	NA	NA	NA	NA	XP_027054675.1 uncharacterized protein LOC113681753 [Pocillopora damicornis]	4.5e-61	OG0002667	66	20	NA	NA	NA	NA	NA	NA
HyS0001.368	0	6.15302	0.967	0.041	0	Gland Cells	15	Zgc	NA	NA	NA	NA	NA	NA	NA	OG0006552	39	14	NA	NA	NA	NA	NA	NA
HyS0001.383	0	2.87034	0.467	0.006	0	Gland Cells	15	Zgc	NA	NA	NA	NA	NA	XP_002166541.1 PREDICTED: uncharacterized protein LOC100215670 [Hydra vulgaris]	8.8e-13	OG0001393	99	27	NA	NA	NA	NA	NA	NA
HyS0001.397	0	4.27411	0.656	0.01	0	Gland Cells	15	Zgc	Membrane-associated protein, putative	NA	NA	NA	integral component of membrane	RNA13468.1 hypothetical protein BpHYR1_012004 [Brachionus plicatilis]	2.1e-65	OG0012809	8	8	NA	NA	NA	NA	NA	NA
HyS0002.168	0	3.00742	0.689	0.01	0	Gland Cells	15	Zgc	NA	NA	NA	NA	NA	NA	NA	OG0014983	6	3	YES	YES	YES	YES	NA	NA
HyS0002.175	0	1.32114	0.333	0	0	Gland Cells	15	Zgc	NA	NA	NA	NA	NA	XP_002159955.1 PREDICTED: uncharacterized protein LOC100203948 [Hydra vulgaris]	3.1e-43	OG0001320	102	23	NA	NA	NA	NA	NA	NA
HyS0002.331	0	3.67172	0.867	0.006	0	Gland Cells	15	Zgc	NA	NA	NA	NA	NA	PVD24050.1 hypothetical protein C0Q70_14519 [Pomacea canaliculata]	6.8e-11	OG0009037	19	12	NA	NA	NA	NA	NA	NA
HyS0002.402	0	0.549229	0.467	0.003	0	Gland Cells	15	Zgc	Meprin A subunit beta	MEP1B	metalloendopeptidase activity	proteolysis	meprin A complex	XP_020893838.1 zinc metalloproteinase nas-14-like [Exaiptasia pallida]	2.2e-147	OG0000004	2368	44	NA	NA	NA	NA	NA	NA
HyS0002.515	0	1.55909	0.411	0.002	0	Gland Cells	15	Zgc	NA	NA	NA	NA	NA	XP_015253597.1 PREDICTED: cytidine monophosphate-N-acetylneuraminic acid hydroxylase-like [Cyprinodon variegatus]	1.9e-15	OG0010166	14	7	NA	NA	NA	NA	NA	NA
HyS0002.91	0	3.11433	0.878	0.005	0	Gland Cells	15	Zgc	NA	NA	NA	NA	NA	XP_012567044.1 PREDICTED: probable inactive serine/threonine-protein kinase DDB_G0274613 [Hydra vulgaris]	1.3e-06	OG0009748	16	8	YES	NA	NA	NA	NA	NA
HyS0003.129	5.43e-257	1.54021	0.378	0.007	1.2e-252	Gland Cells	15	Zgc	Latent transforming growth factor beta binding protein 3	NA	calcium ion binding	extracellular matrix organization	extracellular region	XP_027038938.1 uncharacterized protein LOC113667327 [Pocillopora damicornis]	3.9e-22	OG0000200	384	37	NA	NA	NA	NA	NA	NA
HyS0003.251	0	5.01993	0.722	0.015	0	Gland Cells	15	Zgc	Zinc metalloproteinase	NA	metalloendopeptidase activity	proteolysis	extracellular region	CAJ57448.1 astacin 2 [Hydractinia echinata]	1.1e-67	OG0000004	2368	44	NA	NA	NA	NA	NA	NA
HyS0003.254	0	4.03025	0.633	0.006	0	Gland Cells	15	Zgc	NA	NA	NA	NA	NA	XP_002153855.1 PREDICTED: zinc metalloproteinase nas-4-like [Hydra vulgaris]	2e-11	OG0001326	102	27	NA	NA	NA	NA	NA	NA
HyS0003.490	0	1.16533	0.5	0.001	0	Gland Cells	15	Zgc	NA	NA	NA	NA	NA	XP_012560350.1 PREDICTED: uncharacterized protein LOC105846302 [Hydra vulgaris]	2.4e-156	OG0003112	61	17	NA	NA	NA	NA	NA	NA
HyS0004.181	0	1.12321	0.711	0.004	0	Gland Cells	15	Zgc	SERPIN domain-containing protein	NA	NA	NA	extracellular space	WP_012548383.1 serpin family protein [Dictyoglomus thermophilum]	1.2e-29	OG0000196	390	41	NA	NA	NA	NA	NA	NA
HyS0004.226	0	0.633909	0.489	0.008	0	Gland Cells	15	Zgc	NA	NA	NA	NA	NA	XP_027054350.1 D(2) dopamine receptor-like [Pocillopora damicornis]	5.9e-25	OG0000007	2094	42	NA	NA	NA	NA	NA	NA
HyS0004.291	0	1.04392	0.567	0.002	0	Gland Cells	15	Zgc	NA	NA	NA	NA	NA	NA	NA	OG0017102	5	4	YES	YES	NA	NA	NA	NA
HyS0004.373	4.01e-261	6.28346	0.811	0.041	8.84e-257	Gland Cells	15	Zgc	Glycoside hydrolase	CHN50	chitinase activity	chitin catabolic process	integral component of membrane	XP_002154007.1 PREDICTED: endochitinase 4-like [Hydra vulgaris]	2.3e-214	OG0008792	21	11	NA	NA	NA	NA	NA	NA
HyS0004.419	0	0.515015	0.467	0.001	0	Gland Cells	15	Zgc	NA	NA	NA	NA	NA	XP_012562887.1 PREDICTED: uncharacterized protein LOC105847697 [Hydra vulgaris]	2.9e-99	OG0005058	49	24	NA	NA	NA	NA	NA	NA
HyS0004.87	0	0.485179	0.367	0.003	0	Gland Cells	15	Zgc	NA	NA	NA	NA	NA	XP_012561462.1 PREDICTED: probable G-protein coupled receptor 133 isoform X1 [Hydra vulgaris]	2e-42	OG0000026	1183	45	NA	NA	NA	NA	NA	NA
HyS0005.109	0	1.03094	0.678	0.008	0	Gland Cells	15	Zgc	NA	NA	NA	NA	NA	XP_012554427.1 PREDICTED: uncharacterized protein LOC100200114 isoform X1 [Hydra vulgaris]	2.9e-27	OG0023371	3	3	YES	YES	YES	NA	NA	NA
HyS0005.153	0	4.45564	0.811	0.02	0	Gland Cells	15	Zgc	NA	NA	NA	NA	NA	NA	NA	OG0018603	4	3	YES	YES	YES	YES	NA	NA
HyS0005.338	0	2.94535	0.522	0.001	0	Gland Cells	15	Zgc	NA	NA	NA	NA	NA	XP_020619361.1 uncharacterized protein LOC110057126 [Orbicella faveolata]	5.1e-62	OG0007242	33	13	NA	NA	NA	NA	NA	NA
HyS0006.308	0	2.20291	0.722	0.006	0	Gland Cells	15	Zgc	NA	NA	NA	NA	NA	CAJ65508.1 Dickkopf 1/2/4-A protein [Hydra vulgaris]	1.5e-08	OG0006552	39	14	NA	NA	NA	NA	NA	NA
HyS0007.329	6.85e-238	2.02735	0.256	0.003	1.51e-233	Gland Cells	15	Zgc	NA	NA	NA	NA	NA	XP_015769770.1 PREDICTED: ganglioside GM2 activator-like isoform X3 [Acropora digitifera]	4.9e-09	OG0000797	141	5	NA	NA	NA	NA	NA	NA
HyS0008.240	2.25e-229	2.94248	0.267	0.003	4.96e-225	Gland Cells	15	Zgc	NA	NA	NA	NA	NA	XP_007462247.1 PREDICTED: von Willebrand factor C and EGF domain-containing protein [Lipotes vexillifer]	1e-05	OG0031564	2	2	YES	YES	YES	YES	YES	NA
HyS0009.208	0	4.82384	0.956	0.017	0	Gland Cells	15	Zgc	NA	NA	NA	NA	NA	XP_002166352.1 PREDICTED: uncharacterized protein LOC100207073 isoform X2 [Hydra vulgaris]	2.6e-10	OG0000696	157	16	NA	NA	NA	NA	NA	NA
HyS0009.308	0	2.105	0.789	0.016	0	Gland Cells	15	Zgc	Phosphatidylcholine-sterol acyltransferase (Fragment)	NA	O-acyltransferase activity	lipid metabolic process	extracellular space	XP_022797552.1 group XV phospholipase A2-like [Stylophora pistillata]	7.4e-108	OG0001102	116	48	NA	NA	NA	NA	NA	NA
HyS0010.242	3.39e-282	2.47916	0.667	0.023	7.47e-278	Gland Cells	15	Zgc	Sushi, von Willebrand factor type A, EGF and pentraxin domain-containing protein 1	NA	calcium ion binding	Notch signaling pathway	integral component of membrane	XP_002154505.3 PREDICTED: sushi, von Willebrand factor type A, EGF and pentraxin domain-containing protein 1 [Hydra vulgaris]	0	OG0000045	971	44	NA	NA	NA	NA	NA	NA
HyS0011.187	0	0.946407	0.556	0.004	0	Gland Cells	15	Zgc	LOW QUALITY PROTEIN: sialate O-acetylesterase	SIAE	sialate O-acetylesterase activity	regulation of immune system process	lysosome	XP_001633622.1 predicted protein [Nematostella vectensis]	1.5e-124	OG0002467	68	26	NA	NA	NA	NA	NA	NA
HyS0011.69	0	0.95522	0.344	0.002	0	Gland Cells	15	Zgc	FTP domain-containing protein (Fragment)	NA	lipid transfer activity	intermembrane lipid transfer	extracellular space	XP_006818585.1 PREDICTED: uncharacterized protein LOC102809222 [Saccoglossus kowalevskii]	1.4e-33	OG0000103	567	28	NA	NA	NA	NA	NA	NA
HyS0012.117	0	3.30717	0.911	0.021	0	Gland Cells	15	Zgc	NA	NA	NA	NA	NA	PFX29240.1 hypothetical protein AWC38_SpisGene6056 [Stylophora pistillata]	2.3e-09	OG0012163	9	8	YES	NA	NA	NA	NA	NA
HyS0012.14	0	0.529259	0.522	0.005	0	Gland Cells	15	Zgc	NA	NA	NA	NA	NA	NA	NA	OG0016555	5	4	YES	YES	YES	NA	NA	NA
HyS0012.202	0	1.55646	0.711	0.011	0	Gland Cells	15	Zgc	NA	NA	NA	NA	NA	XP_020609682.1 uncharacterized protein LOC110048230 [Orbicella faveolata]	3e-23	OG0017107	5	3	YES	NA	NA	NA	NA	NA
HyS0012.204	0	5.23226	0.844	0.034	0	Gland Cells	15	Zgc	NA	NA	NA	NA	NA	XP_012565675.1 PREDICTED: uncharacterized protein LOC100206800 [Hydra vulgaris]	8.4e-56	OG0014954	6	4	YES	YES	YES	NA	NA	NA
HyS0012.40	8.54e-285	3.053	0.367	0.005	1.88e-280	Gland Cells	15	Zgc	Matrix metalloproteinase 14	NA	metalloendopeptidase activity	collagen catabolic process	extracellular matrix	XP_012566011.1 PREDICTED: 72 kDa type IV collagenase-like [Hydra vulgaris]	9.8e-60	OG0000099	579	41	NA	NA	NA	NA	NA	NA
HyS0013.118	0	3.2324	0.878	0.005	0	Gland Cells	15	Zgc	NA	NA	NA	NA	NA	XP_019620048.1 PREDICTED: uncharacterized protein LOC109466730 [Branchiostoma belcheri]	1.1e-48	OG0010923	12	6	YES	YES	NA	NA	NA	NA
HyS0013.123	0	1.17234	0.767	0.024	0	Gland Cells	15	Zgc	NA	NA	NA	NA	NA	XP_013461323.1 BTB/POZ domain-containing protein At4g08455 [Medicago truncatula]	2.7e-05	OG0031067	2	2	YES	YES	YES	YES	YES	NA
HyS0013.243	0	2.60583	0.744	0.018	0	Gland Cells	15	Zgc	A disintegrin and metalloproteinase with thrombospondin motifs 16	NA	chitin binding	integrin-mediated signaling pathway	extracellular region	XP_020906501.1 uncharacterized protein LOC110244635 isoform X1 [Exaiptasia pallida]	1.9e-65	OG0000249	333	19	NA	NA	NA	NA	NA	NA
HyS0013.51	0	4.18982	0.478	0.007	0	Gland Cells	15	Zgc	Zinc metalloproteinase	NA	metalloendopeptidase activity	proteolysis	extracellular region	CAJ57448.1 astacin 2 [Hydractinia echinata]	1.2e-86	OG0000004	2368	44	NA	NA	NA	NA	NA	NA
HyS0014.104	0	1.48876	0.733	0.003	0	Gland Cells	15	Zgc	NA	NA	NA	NA	NA	XP_002156977.1 PREDICTED: uncharacterized protein LOC100201344 [Hydra vulgaris]	1.1e-46	OG0002310	71	17	NA	NA	NA	NA	NA	NA
HyS0014.210	2.43e-208	6.07143	0.678	0.036	5.36e-204	Gland Cells	15	Zgc	Acidic endochitinase	NA	hydrolase activity, hydrolyzing O-glycosyl compounds	chitin metabolic process	extracellular region	CAL36995.1 chitinase 2 [Hydractinia echinata]	2.5e-249	OG0001753	84	19	NA	NA	NA	NA	NA	NA
HyS0016.206	0	2.85974	0.744	0.005	0	Gland Cells	15	Zgc	Serine proteinase stubble	NA	serine-type endopeptidase activity	proteolysis	extracellular region	XP_002162561.1 PREDICTED: serine protease 27-like [Hydra vulgaris]	1.7e-109	OG0000006	2162	44	NA	NA	NA	NA	NA	NA
HyS0016.270	0	0.801234	0.433	0.004	0	Gland Cells	15	Zgc	NA	NA	NA	NA	NA	XP_012555614.1 PREDICTED: uncharacterized protein LOC105844041 [Hydra vulgaris]	2.8e-26	OG0031547	2	2	YES	YES	YES	YES	YES	NA
HyS0017.271	0	4.99531	0.633	0.014	0	Gland Cells	15	Zgc	Inositol polyphosphate phosphatase	NA	hydrolase activity, hydrolyzing O-glycosyl compounds	carbohydrate metabolic process	extracellular region	XP_002156254.1 PREDICTED: chitinase 3-like [Hydra vulgaris]	8.8e-168	OG0001753	84	19	NA	NA	NA	NA	NA	NA
HyS0017.316	2.78e-242	2.44002	0.711	0.033	6.12e-238	Gland Cells	15	Zgc	latent-transforming growth factor beta-binding protein 1-like isoform X3	NA	calcium ion binding	Notch signaling pathway	extracellular region	XP_012554217.1 PREDICTED: sushi, von Willebrand factor type A, EGF and pentraxin domain-containing protein 1-like [Hydra vulgaris]	0	OG0000045	971	44	NA	NA	NA	NA	NA	NA
HyS0018.155	0	3.53265	0.589	0.004	0	Gland Cells	15	Zgc	Endonuclease, polyU-specific C	NA	endoribonuclease activity	RNA phosphodiester bond hydrolysis, endonucleolytic	nucleus	XP_002165765.1 PREDICTED: poly(U)-specific endoribonuclease-B-like [Hydra vulgaris]	3.1e-60	OG0001138	113	43	NA	NA	NA	NA	NA	NA
HyS0018.196	0	4.53146	0.711	0.015	0	Gland Cells	15	Zgc	Zinc metalloproteinase	NA	endopeptidase activity	proteolysis	extracellular region	XP_022787898.1 zinc metalloproteinase nas-15-like [Stylophora pistillata]	1.5e-98	OG0000006	2162	44	NA	NA	NA	NA	NA	NA
HyS0018.197	0	3.85802	0.589	0.008	0	Gland Cells	15	Zgc	Zinc metalloproteinase	NA	metalloendopeptidase activity	proteolysis	extracellular region	XP_028406564.1 uncharacterized protein LOC114529037 [Dendronephthya gigantea]	3.4e-94	OG0000004	2368	44	NA	NA	NA	NA	NA	NA
HyS0018.55	0	3.96311	0.944	0.008	0	Gland Cells	15	Zgc	NA	NA	NA	NA	NA	NA	NA	Unassigned	NA	NA	NA	NA	NA	NA	NA	NA
HyS0018.69	0	2.35764	0.633	0.014	0	Gland Cells	15	Zgc	von Willebrand factor type A domaincontaining protein	NA	NA	NA	NA	XP_012556094.1 PREDICTED: sushi, von Willebrand factor type A, EGF and pentraxin domain-containing protein 1-like, partial [Hydra vulgaris]	2.8e-219	OG0000045	971	44	NA	NA	NA	NA	NA	NA
HyS0018.91	0	3.31754	0.544	0.009	0	Gland Cells	15	Zgc	NA	NA	NA	NA	NA	NA	NA	OG0031526	2	2	YES	YES	YES	YES	YES	NA
HyS0019.111	0	0.462765	0.489	0.002	0	Gland Cells	15	Zgc	NA	NA	NA	NA	NA	NA	NA	OG0006558	39	9	NA	NA	NA	NA	NA	NA
HyS0020.52	0	1.32761	0.756	0.015	0	Gland Cells	15	Zgc	NA	NA	NA	NA	NA	AEA86515.1 spherulin [Astrosclera willeyana]	2.5e-50	OG0012753	8	3	NA	NA	NA	NA	NA	NA
HyS0021.95	0	3.25098	0.344	0.003	0	Gland Cells	15	Zgc	Alpha-glucosidase	NA	carbohydrate binding	proteolysis	NA	PIK56733.1 hypothetical protein BSL78_06375 [Apostichopus japonicus]	5.7e-73	OG0001326	102	27	NA	NA	NA	NA	NA	NA
HyS0022.228	0	1.31592	0.356	0.001	0	Gland Cells	15	Zgc	NA	NA	NA	NA	NA	RMX41365.1 hypothetical protein pdam_00012790 [Pocillopora damicornis]	5.1e-170	OG0002118	75	16	NA	NA	NA	NA	NA	NA
HyS0022.243	1.81e-307	2.85089	0.778	0.03	3.98e-303	Gland Cells	15	Zgc	latent-transforming growth factor beta-binding protein 4	NA	calcium ion binding	cell-matrix adhesion	collagen-containing extracellular matrix	XP_020605295.1 uncharacterized protein LOC110044115 [Orbicella faveolata]	2e-64	OG0010901	12	8	YES	NA	NA	NA	NA	NA
HyS0022.30	0	2.99933	0.9	0.02	0	Gland Cells	15	Zgc	NA	NA	NA	NA	NA	QBH70098.1 CreM12-ShK5 [Colubraria reticulata]	3.5e-10	OG0007912	27	15	NA	NA	NA	NA	NA	NA
HyS0022.32	0	2.25572	0.722	0.002	0	Gland Cells	15	Zgc	NA	NA	NA	NA	NA	XP_028404895.1 uncharacterized protein LOC114527444 [Dendronephthya gigantea]	2.2e-12	OG0007912	27	15	NA	NA	NA	NA	NA	NA
HyS0022.57	0	1.09492	0.644	0.006	0	Gland Cells	15	Zgc	NA	NA	NA	NA	NA	NA	NA	OG0031319	2	2	YES	YES	YES	YES	YES	NA
HyS0023.103	0	2.6596	0.456	0.002	0	Gland Cells	15	Zgc	NA	NA	NA	NA	NA	XP_002156354.1 PREDICTED: uncharacterized protein LOC100205674 [Hydra vulgaris]	3e-32	OG0001320	102	23	NA	NA	NA	NA	NA	NA
HyS0023.46	0	4.92733	0.844	0.02	0	Gland Cells	15	Zgc	Zinc metalloproteinase	NA	metalloendopeptidase activity	proteolysis	membrane	CAJ57448.1 astacin 2 [Hydractinia echinata]	3.5e-65	OG0000004	2368	44	NA	NA	NA	NA	NA	NA
HyS0024.150	0	1.85134	0.256	0.001	0	Gland Cells	15	Zgc	LOW QUALITY PROTEIN: neurotrypsin	NA	serine-type endopeptidase activity	proteolysis	integral component of membrane	XP_020913858.1 serine protease 44-like [Exaiptasia pallida]	8.5e-56	OG0000006	2162	44	NA	NA	NA	NA	NA	NA
HyS0024.192	0	1.56002	0.722	0.003	0	Gland Cells	15	Zgc	NA	NA	NA	NA	NA	NA	NA	OG0008063	26	5	YES	YES	NA	NA	NA	NA
HyS0024.203	0	4.26322	0.656	0.009	0	Gland Cells	15	Zgc	Related to PRY1-strong similarity to the plant PR-1 class of pathogen related proteins	NA	structural constituent of cytoskeleton	microtubule-based process	extracellular region	KXJ21198.1 Golgi-associated plant pathogenesis-related protein 1 [Exaiptasia pallida]	2.6e-32	OG0000074	641	44	NA	NA	NA	NA	NA	NA
HyS0024.87	0	2.14065	0.578	0.005	0	Gland Cells	15	Zgc	NA	NA	NA	NA	NA	XP_002165607.1 PREDICTED: uncharacterized protein LOC100199767 [Hydra vulgaris]	6.2e-42	OG0001300	104	4	YES	YES	YES	NA	NA	NA
HyS0025.103	0	0.647417	0.311	0.001	0	Gland Cells	15	Zgc	macrophage metalloelastase	NA	metalloendopeptidase activity	proteolysis	extracellular matrix	XP_028393937.1 matrilysin-like [Dendronephthya gigantea]	7.4e-62	OG0000099	579	41	NA	NA	NA	NA	NA	NA
HyS0025.22	0	2.49086	0.567	0.003	0	Gland Cells	15	Zgc	Zinc metalloproteinase	NA	metalloendopeptidase activity	proteolysis	extracellular region	XP_002161766.1 PREDICTED: zinc metalloproteinase nas-15-like [Hydra vulgaris]	2.8e-51	OG0000004	2368	44	NA	NA	NA	NA	NA	NA
HyS0025.36	0	0.589028	0.311	0.001	0	Gland Cells	15	Zgc	Guanine nucleotide exchange factor VAV3	NA	serine-type endopeptidase activity	proteolysis	extracellular space	PFX20186.1 Trypsin-3 [Stylophora pistillata]	1.2e-57	OG0000006	2162	44	NA	NA	NA	NA	NA	NA
HyS0025.37	3.44e-274	2.4416	0.378	0.006	7.59e-270	Gland Cells	15	Zgc	Brain chitinase and chia	NA	serine-type endopeptidase activity	proteolysis	extracellular space	PFX20186.1 Trypsin-3 [Stylophora pistillata]	5.9e-60	OG0000006	2162	44	NA	NA	NA	NA	NA	NA
HyS0025.38	0	1.9807	0.533	0.001	0	Gland Cells	15	Zgc	Chymotrypsinogen B	NA	serine-type endopeptidase activity	proteolysis	extracellular space	XP_027047423.1 chymotrypsinogen B-like [Pocillopora damicornis]	8.5e-61	OG0000006	2162	44	NA	NA	NA	NA	NA	NA
HyS0026.146	7.29e-308	3.58713	0.344	0.004	1.61e-303	Gland Cells	15	Zgc	Pancreatic triacylglycerol lipase	NA	triglyceride lipase activity	lipid metabolic process	extracellular region	XP_012564493.1 PREDICTED: pancreatic lipase-related protein 2-like [Hydra vulgaris]	5.8e-133	OG0000247	333	35	NA	NA	NA	NA	NA	NA
HyS0027.158	0	1.24726	0.578	0.005	0	Gland Cells	15	Zgc	Metalloendopeptidase	NA	carbohydrate binding	proteolysis	membrane	XP_001416774.1 predicted protein, partial [Ostreococcus lucimarinus CCE9901]	9.2e-38	OG0000200	384	37	NA	NA	NA	NA	NA	NA
HyS0027.159	0	0.53744	0.256	0.001	0	Gland Cells	15	Zgc	Metalloendopeptidase	NA	carbohydrate binding	proteolysis	NA	XP_014280987.1 rhamnose-binding lectin [Halyomorpha halys]	2.6e-38	OG0000200	384	37	NA	NA	NA	NA	NA	NA
HyS0028.247	0	1.89046	0.433	0.005	0	Gland Cells	15	Zgc	NA	NA	NA	NA	NA	NA	NA	OG0030750	2	2	YES	YES	YES	YES	YES	NA
HyS0029.125	0	0.942555	0.578	0.002	0	Gland Cells	15	Zgc	NA	NA	NA	NA	NA	PIO32804.1 hypothetical protein AB205_0165870 [Rana catesbeiana]	5.2e-54	OG0031550	2	2	YES	YES	YES	YES	YES	NA
HyS0029.153	0	0.922883	0.633	0.003	0	Gland Cells	15	Zgc	NA	NA	NA	NA	NA	XP_002160266.2 PREDICTED: protein disulfide isomerase-like 2-2 isoform X1 [Hydra vulgaris]	4.7e-93	OG0000730	151	48	NA	NA	NA	NA	NA	NA
HyS0029.158	0	0.751776	0.511	0.002	0	Gland Cells	15	Zgc	NA	NA	NA	NA	NA	XP_002166012.3 PREDICTED: BPTI/Kunitz domain-containing protein 4-like [Hydra vulgaris]	1.9e-10	OG0000766	146	40	NA	NA	NA	NA	NA	NA
HyS0030.143	0	2.19073	0.4	0.002	0	Gland Cells	15	Zgc	Zinc metalloproteinase	NA	metalloendopeptidase activity	proteolysis	extracellular region	XP_012555527.1 PREDICTED: von Willebrand factor D and EGF domain-containing protein-like, partial [Hydra vulgaris]	1.4e-105	OG0000323	280	31	NA	NA	NA	NA	NA	NA
HyS0030.201	0	0.736351	0.422	0.004	0	Gland Cells	15	Zgc	NA	NA	NA	NA	NA	NA	NA	OG0030857	2	2	YES	YES	YES	YES	YES	NA
HyS0031.26	0	4.6387	0.511	0.01	0	Gland Cells	15	Zgc	Metalloendopeptidase	NA	metalloendopeptidase activity	proteolysis	NA	XP_002153855.1 PREDICTED: zinc metalloproteinase nas-4-like [Hydra vulgaris]	4.1e-72	OG0000004	2368	44	NA	NA	NA	NA	NA	NA
HyS0032.174	8.03e-259	6.10031	0.8	0.041	1.77e-254	Gland Cells	15	Zgc	Sea star regeneration-associated protease SRAP	NA	serine-type endopeptidase activity	proteolysis	extracellular space	XP_002156019.2 PREDICTED: trypsin-3-like [Hydra vulgaris]	3.3e-90	OG0000006	2162	44	NA	NA	NA	NA	NA	NA
HyS0032.236	8.61e-278	0.699536	0.467	0.01	1.9e-273	Gland Cells	15	Zgc	Cation-transporting ATPase	NA	sequence-specific DNA binding	regulation of transcription, DNA-templated	nucleus	XP_012269041.1 LIM homeobox transcription factor 1-beta [Athalia rosae]	1.2e-41	OG0000157	438	44	NA	NA	NA	NA	NA	NA
HyS0033.197	0	3.95604	0.544	0.005	0	Gland Cells	15	Zgc	NA	NA	NA	NA	NA	XP_023215965.1 astacin-like metalloprotease toxin 5 [Centruroides sculpturatus]	1.3e-06	OG0030650	2	2	YES	YES	YES	YES	YES	NA
HyS0033.92	0	5.02074	0.722	0.013	0	Gland Cells	15	Zgc	Transmembrane protease serine 9	NA	serine-type endopeptidase activity	proteolysis	membrane	AAO12213.1 serine protease 1, partial [Aurelia aurita]	2.9e-65	OG0000006	2162	44	NA	NA	NA	NA	NA	NA
HyS0034.136	3.55e-224	6.3058	0.711	0.036	7.82e-220	Gland Cells	15	Zgc	NA	NA	NA	NA	NA	NA	NA	OG0023468	3	2	YES	YES	YES	YES	YES	NA
HyS0034.88	0	3.36907	0.711	0.003	0	Gland Cells	15	Zgc	Latent-transforming growth factor beta-binding protein 4	FBN2	calcium ion binding	sequestering of TGFbeta in extracellular matrix	microfibril	XP_012563331.1 PREDICTED: sushi, von Willebrand factor type A, EGF and pentraxin domain-containing protein 1-like [Hydra vulgaris]	2.2e-133	OG0001653	88	23	NA	NA	NA	NA	NA	NA
HyS0035.33	1.18e-269	5.12521	0.611	0.02	2.61e-265	Gland Cells	15	Zgc	NA	NA	NA	NA	NA	XP_012565675.1 PREDICTED: uncharacterized protein LOC100206800 [Hydra vulgaris]	5.4e-28	OG0010304	14	8	YES	YES	NA	NA	NA	NA
HyS0035.68	0	4.19172	0.789	0.009	0	Gland Cells	15	Zgc	NA	NA	NA	NA	NA	XP_020609682.1 uncharacterized protein LOC110048230 [Orbicella faveolata]	3.2e-22	OG0017107	5	3	YES	NA	NA	NA	NA	NA
HyS0036.110	0	1.02364	0.644	0.016	0	Gland Cells	15	Zgc	Neogenin	NA	signaling receptor activity	positive regulation of BMP signaling pathway	integral component of plasma membrane	XP_002613567.1 hypothetical protein BRAFLDRAFT_208436 [Branchiostoma floridae]	3e-94	OG0000441	219	36	NA	NA	NA	NA	NA	NA
HyS0036.2	0	2.49466	0.7	0.004	0	Gland Cells	15	Zgc	NA	NA	NA	NA	NA	NA	NA	Unassigned	NA	NA	NA	NA	NA	NA	NA	NA
HyS0036.58	2.66e-226	0.66064	0.367	0.008	5.85e-222	Gland Cells	15	Zgc	NA	NA	NA	NA	NA	XP_023359401.1 TNF receptor-associated factor 4 [Sarcophilus harrisii]	5.8e-32	OG0000030	1121	44	NA	NA	NA	NA	NA	NA
HyS0037.119	0	2.74473	0.344	0.002	0	Gland Cells	15	Zgc	Zinc metalloproteinase	NA	metalloendopeptidase activity	proteolysis	extracellular region	XP_002157741.1 PREDICTED: blastula protease 10-like [Hydra vulgaris]	9.4e-84	OG0000004	2368	44	NA	NA	NA	NA	NA	NA
HyS0037.37	0	3.03662	0.789	0.004	0	Gland Cells	15	Zgc	Sea star regeneration-associated protease SRAP	NA	serine-type endopeptidase activity	proteolysis	extracellular space	RMX59825.1 hypothetical protein pdam_00007343 [Pocillopora damicornis]	3.4e-68	OG0000006	2162	44	NA	NA	NA	NA	NA	NA
HyS0039.20	0	0.796857	0.611	0.013	0	Gland Cells	15	Zgc	Zinc metalloproteinase	NA	metalloendopeptidase activity	proteolysis	extracellular region	XP_002165364.1 PREDICTED: zinc metalloproteinase nas-4-like [Hydra vulgaris]	1.5e-79	OG0000004	2368	44	NA	NA	NA	NA	NA	NA
HyS0039.83	8.54e-206	0.375602	0.5	0.017	1.88e-201	Gland Cells	15	Zgc	NA	NA	NA	NA	NA	XP_012558151.1 PREDICTED: alpha-2B adrenergic receptor-like [Hydra vulgaris]	4.3e-64	OG0000007	2094	42	NA	NA	NA	NA	NA	NA
HyS0040.119	0	1.64257	0.311	0.001	0	Gland Cells	15	Zgc	Zinc metalloproteinase	NA	metalloendopeptidase activity	proteolysis	extracellular region	XP_002155073.2 PREDICTED: zinc metalloproteinase nas-6-like isoform X1 [Hydra vulgaris]	7.4e-47	OG0015885	5	4	YES	YES	NA	NA	NA	NA
HyS0040.80	0	3.52811	0.622	0.006	0	Gland Cells	15	Zgc	MAM and LDL-receptor class A domain-containing protein 1	NA	metalloendopeptidase activity	proteolysis	membrane	NP_001296648.1 meprin A subunit beta-like precursor [Hydra vulgaris]	1e-178	OG0000004	2368	44	NA	NA	NA	NA	NA	NA
HyS0040.86	0	2.56816	0.444	0.004	0	Gland Cells	15	Zgc	NA	NA	NA	NA	NA	XP_001632794.1 predicted protein [Nematostella vectensis]	6.6e-10	OG0009263	18	11	NA	NA	NA	NA	NA	NA
HyS0041.55	0	3.9	0.789	0.008	0	Gland Cells	15	Zgc	Amino acid ABC transporter substrate-binding protein (PAAT family)	NA	ion gated channel activity	potassium ion transmembrane transport	voltage-gated potassium channel complex	XP_012558843.1 PREDICTED: uncharacterized protein LOC105845533 [Hydra vulgaris]	3.1e-20	OG0019746	4	2	YES	YES	YES	YES	YES	NA
HyS0041.90	0	1.79776	0.578	0.006	0	Gland Cells	15	Zgc	glycoprotein 3-alpha-L-fucosyltransferase A	NA	fucosyltransferase activity	fucosylation	Golgi cisterna membrane	XP_002168730.2 PREDICTED: glycoprotein 3-alpha-L-fucosyltransferase A-like [Hydra vulgaris]	4.7e-84	OG0000064	743	44	NA	NA	NA	NA	NA	NA
HyS0042.128	2.26e-261	5.27263	0.578	0.019	4.99e-257	Gland Cells	15	Zgc	NA	NA	NA	NA	NA	XP_002158712.1 PREDICTED: uncharacterized protein LOC100203182 [Hydra vulgaris]	3.4e-11	OG0013878	7	4	YES	YES	YES	NA	NA	NA
HyS0042.129	7.35e-229	5.60149	0.544	0.019	1.62e-224	Gland Cells	15	Zgc	NA	NA	NA	NA	NA	XP_002158712.1 PREDICTED: uncharacterized protein LOC100203182 [Hydra vulgaris]	7.1e-11	OG0013878	7	4	YES	YES	YES	NA	NA	NA
HyS0042.179	0	0.910063	0.567	0.003	0	Gland Cells	15	Zgc	NA	NA	NA	NA	NA	KXJ15097.1 Actin-1/2 [Exaiptasia pallida]	3.4e-12	OG0006836	36	26	NA	NA	NA	NA	NA	NA
HyS0043.119	0	3.30441	0.433	0.006	0	Gland Cells	15	Zgc	Zinc metalloproteinase	NA	metalloendopeptidase activity	proteolysis	extracellular region	XP_002153855.1 PREDICTED: zinc metalloproteinase nas-4-like [Hydra vulgaris]	5.9e-49	OG0000004	2368	44	NA	NA	NA	NA	NA	NA
HyS0046.113	0	2.82273	0.489	0.004	0	Gland Cells	15	Zgc	Zinc metalloproteinase	DPY-31	metalloendopeptidase activity	molting cycle, collagen and cuticulin-based cuticle	extracellular region	XP_002157741.1 PREDICTED: blastula protease 10-like [Hydra vulgaris]	4.8e-74	OG0000004	2368	44	NA	NA	NA	NA	NA	NA
HyS0047.60	0	1.61002	0.544	0.003	0	Gland Cells	15	Zgc	Hatching enzyme	MMP27	metalloendopeptidase activity	proteolysis	extracellular matrix	XP_002164557.2 PREDICTED: matrix metalloproteinase-27-like [Hydra vulgaris]	5.2e-69	OG0000099	579	41	NA	NA	NA	NA	NA	NA
HyS0048.38	0	1.32972	0.644	0.006	0	Gland Cells	15	Zgc	Phosphatidylserine synthase 2 isoform B	NA	calcium-dependent phospholipid binding	regulation of secretion by cell	exocytic vesicle	XP_020608932.1 synaptotagmin-1-like [Orbicella faveolata]	2e-60	OG0000052	896	49	NA	NA	NA	NA	NA	NA
HyS0049.152	0	2.58121	0.689	0.002	0	Gland Cells	15	Zgc	Zinc metalloproteinase	NA	metalloendopeptidase activity	proteolysis	extracellular region	XP_012565441.1 PREDICTED: blastula protease 10-like [Hydra vulgaris]	4.2e-49	OG0000004	2368	44	NA	NA	NA	NA	NA	NA
HyS0049.153	3.62e-251	4.83966	0.378	0.007	7.98e-247	Gland Cells	15	Zgc	Zinc metalloproteinase	NA	metalloendopeptidase activity	proteolysis	extracellular region	XP_002159980.2 PREDICTED: low choriolytic enzyme-like [Hydra vulgaris]	2.9e-53	OG0000004	2368	44	NA	NA	NA	NA	NA	NA
HyS0049.62	0	1.91316	0.7	0.004	0	Gland Cells	15	Zgc	NA	NA	NA	NA	NA	XP_002157833.1 PREDICTED: ganglioside GM2 activator-like [Hydra vulgaris]	3.2e-09	OG0023603	3	2	YES	YES	YES	YES	YES	NA
HyS0049.66	6.32e-283	6.24028	0.844	0.042	1.39e-278	Gland Cells	15	Zgc	NA	NA	NA	NA	NA	XP_002157833.1 PREDICTED: ganglioside GM2 activator-like [Hydra vulgaris]	3e-18	OG0001531	92	33	NA	NA	NA	NA	NA	NA
HyS0050.70	0	0.603725	0.544	0.002	0	Gland Cells	15	Zgc	NA	NA	NA	NA	NA	XP_002155265.2 PREDICTED: polyamine oxidase 1-like [Hydra vulgaris]	2.2e-07	OG0000256	326	47	NA	NA	NA	NA	NA	NA
HyS0050.71	0	2.04959	0.756	0.003	0	Gland Cells	15	Zgc	NA	NA	NA	NA	NA	XP_002157250.1 PREDICTED: polyamine oxidase 1-like [Hydra vulgaris]	5.8e-24	OG0000256	326	47	NA	NA	NA	NA	NA	NA
HyS0051.112	0	4.80784	0.622	0.013	0	Gland Cells	15	Zgc	Zinc metalloproteinase	NA	metalloendopeptidase activity	molting cycle, collagen and cuticulin-based cuticle	extracellular region	CAJ57448.1 astacin 2 [Hydractinia echinata]	2.9e-56	OG0000004	2368	44	NA	NA	NA	NA	NA	NA
HyS0051.113	0	3.34137	0.589	0.005	0	Gland Cells	15	Zgc	Zinc metalloproteinase	NA	metalloendopeptidase activity	proteolysis	extracellular region	XP_002153855.1 PREDICTED: zinc metalloproteinase nas-4-like [Hydra vulgaris]	1.1e-58	OG0000004	2368	44	NA	NA	NA	NA	NA	NA
HyS0051.129	0	4.68255	0.7	0.009	0	Gland Cells	15	Zgc	Cysteine rich transmembrane BMP regulator 1	CRIM1	serine-type endopeptidase inhibitor activity	negative regulation of endopeptidase activity	extracellular region	XP_009011605.1 hypothetical protein HELRODRAFT_117034 [Helobdella robusta]	0.00022	OG0004445	52	17	NA	NA	NA	NA	NA	NA
HyS0052.124	0	0.696467	0.533	0.002	0	Gland Cells	15	Zgc	Calumenin-A	NA	calcium ion binding	NA	endoplasmic reticulum	XP_002155513.3 PREDICTED: calumenin-B-like [Hydra vulgaris]	2e-75	OG0000389	239	45	NA	NA	NA	NA	NA	NA
HyS0052.134	1.88e-208	0.366496	0.467	0.015	4.15e-204	Gland Cells	15	Zgc	Polyenoic fatty acid isomerase	NA	isomerase activity	oxidation-reduction process	NA	XP_002163966.2 PREDICTED: polyenoic fatty acid isomerase-like [Hydra vulgaris]	3.4e-121	OG0007690	29	12	NA	NA	NA	NA	NA	NA
HyS0052.18	0	1.73172	0.411	0.003	0	Gland Cells	15	Zgc	Zinc metalloproteinase	NA	metalloendopeptidase activity	proteolysis	extracellular region	XP_002157741.1 PREDICTED: blastula protease 10-like [Hydra vulgaris]	4.5e-83	OG0000004	2368	44	NA	NA	NA	NA	NA	NA
HyS0052.48	0	0.362049	0.411	0.006	0	Gland Cells	15	Zgc	NA	NA	NA	NA	NA	PIK39696.1 putative SCAN domain-containing protein 3-like [Apostichopus japonicus]	4.5e-18	OG0007610	30	3	NA	NA	NA	NA	NA	NA
HyS0052.5	0	1.7978	0.3	0.001	0	Gland Cells	15	Zgc	NA	NA	NA	NA	NA	NA	NA	OG0015247	6	4	YES	YES	NA	NA	NA	NA
HyS0052.6	2.74e-225	4.93971	0.4	0.01	6.04e-221	Gland Cells	15	Zgc	NA	NA	NA	NA	NA	ACY74435.1 unknown, partial [Carukia barnesi]	0.00048	OG0016525	5	4	YES	YES	NA	NA	NA	NA
HyS0054.26	0	3.79136	0.567	0.006	0	Gland Cells	15	Zgc	Zinc metalloproteinase	NA	metalloendopeptidase activity	proteolysis	extracellular region	XP_002153855.1 PREDICTED: zinc metalloproteinase nas-4-like [Hydra vulgaris]	2.2e-84	OG0000004	2368	44	NA	NA	NA	NA	NA	NA
HyS0054.27	0	2.26479	0.378	0.001	0	Gland Cells	15	Zgc	Zinc metalloproteinase	NA	metalloendopeptidase activity	proteolysis	extracellular region	XP_002153855.1 PREDICTED: zinc metalloproteinase nas-4-like [Hydra vulgaris]	1e-82	OG0000004	2368	44	NA	NA	NA	NA	NA	NA
HyS0054.33	1.76e-277	3.17332	0.267	0.002	3.88e-273	Gland Cells	15	Zgc	Meprin A subunit alpha	NA	metalloendopeptidase activity	proteolysis	membrane	XP_012565928.1 PREDICTED: zinc metalloproteinase nas-15-like [Hydra vulgaris]	2e-181	OG0000004	2368	44	NA	NA	NA	NA	NA	NA
HyS0054.55	0	3.58675	0.867	0.02	0	Gland Cells	15	Zgc	NA	NA	NA	NA	NA	XP_028396005.1 transcobalamin-2-like [Dendronephthya gigantea]	2.8e-07	OG0003145	60	30	NA	NA	NA	NA	NA	NA
HyS0055.16	0	0.586737	0.533	0.004	0	Gland Cells	15	Zgc	NA	NA	NA	NA	NA	NA	NA	OG0030972	2	2	YES	YES	YES	YES	YES	NA
HyS0055.62	0	2.02931	0.456	0.002	0	Gland Cells	15	Zgc	Sea star regeneration-associated protease SRAP	NA	serine-type endopeptidase activity	proteolysis	extracellular space	XP_020615462.1 chymotrypsinogen B-like [Orbicella faveolata]	2e-66	OG0000006	2162	44	NA	NA	NA	NA	NA	NA
HyS0056.51	0	2.04245	0.767	0.002	0	Gland Cells	15	Zgc	Achaete-scute complex protein 2	NA	protein dimerization activity	regulation of transcription by RNA polymerase II	transcription factor complex	AAQ75376.1 transcription factor Ash2 [Podocoryna carnea]	3.9e-55	OG0000046	946	42	NA	NA	NA	NA	NA	NA
HyS0056.55	0	2.21564	0.778	0.002	0	Gland Cells	15	Zgc	NA	NA	NA	NA	NA	NA	NA	OG0031178	2	2	YES	YES	YES	YES	YES	NA
HyS0058.30	5e-236	6.32771	0.656	0.028	1.1e-231	Gland Cells	15	Zgc	Gamma-glutamyltranspeptidase	NA	glutathione hydrolase activity	glutathione catabolic process	integral component of membrane	XP_012565928.1 PREDICTED: zinc metalloproteinase nas-15-like [Hydra vulgaris]	3.5e-177	OG0000172	418	49	NA	NA	NA	NA	NA	NA
HyS0058.92	0	3.89239	0.656	0.006	0	Gland Cells	15	Zgc	Acidic endochitinase	NA	polysaccharide binding	carbohydrate metabolic process	extracellular region	XP_028393957.1 uncharacterized protein LOC114518207 isoform X1 [Dendronephthya gigantea]	2.5e-119	OG0008217	25	10	NA	NA	NA	NA	NA	NA
HyS0062.12	8.5e-295	4.34169	0.756	0.031	1.87e-290	Gland Cells	15	Zgc	Zinc metalloproteinase	NA	metalloendopeptidase activity	proteolysis	extracellular region	XP_002162957.2 PREDICTED: low choriolytic enzyme-like [Hydra vulgaris]	7.1e-85	OG0000004	2368	44	NA	NA	NA	NA	NA	NA
HyS0062.82	0	1.62066	0.533	0.001	0	Gland Cells	15	Zgc	Zinc metalloproteinase	NA	metalloendopeptidase activity	proteolysis	extracellular region	XP_002161766.1 PREDICTED: zinc metalloproteinase nas-15-like [Hydra vulgaris]	3.4e-81	OG0000004	2368	44	NA	NA	NA	NA	NA	NA
HyS0062.83	0	1.5591	0.589	0.002	0	Gland Cells	15	Zgc	NA	NA	NA	NA	NA	NA	NA	OG0023550	3	2	YES	YES	YES	YES	YES	NA
HyS0062.88	0	1.0002	0.456	0.001	0	Gland Cells	15	Zgc	Zinc metalloproteinase	NA	metalloendopeptidase activity	proteolysis	extracellular region	XP_002153855.1 PREDICTED: zinc metalloproteinase nas-4-like [Hydra vulgaris]	8.9e-82	OG0000004	2368	44	NA	NA	NA	NA	NA	NA
HyS0062.89	0	0.819258	0.4	0.001	0	Gland Cells	15	Zgc	NA	NA	NA	NA	NA	NA	NA	OG0023550	3	2	YES	YES	YES	YES	YES	NA
HyS0063.64	0	4.81673	0.567	0.013	0	Gland Cells	15	Zgc	NA	NA	NA	NA	NA	XP_020910487.1 uncharacterized protein LOC110248314 [Exaiptasia pallida]	8e-17	OG0001352	101	13	NA	NA	NA	NA	NA	NA
HyS0067.33	0	1.83861	0.8	0.01	0	Gland Cells	15	Zgc	NA	NA	NA	NA	NA	XP_013069521.1 PREDICTED: endoglucanase 4-like isoform X1 [Biomphalaria glabrata]	1.6e-05	OG0013883	7	3	YES	YES	YES	YES	NA	NA
HyS0068.86	0	4.27915	0.478	0.008	0	Gland Cells	15	Zgc	NA	NA	NA	NA	NA	XP_002160463.2 PREDICTED: U9-ctenitoxin-Pr1a-like [Hydra vulgaris]	9.8e-18	OG0010585	13	10	YES	NA	NA	NA	NA	NA
HyS0071.17	0	0.960132	0.567	0.005	0	Gland Cells	15	Zgc	NA	NA	NA	NA	NA	NA	NA	OG0031011	2	2	YES	YES	YES	YES	YES	NA
HyS0072.35	0	0.655243	0.322	0	0	Gland Cells	15	Zgc	Zinc metalloproteinase	NA	metalloendopeptidase activity	proteolysis	extracellular region	XP_027039006.1 uncharacterized protein LOC113667390 [Pocillopora damicornis]	6.2e-51	OG0000004	2368	44	NA	NA	NA	NA	NA	NA
HyS0072.37	4.14e-229	6.06745	0.7	0.035	9.11e-225	Gland Cells	15	Zgc	Zinc metalloproteinase	NA	metalloendopeptidase activity	molting cycle, collagen and cuticulin-based cuticle	extracellular region	RMX49892.1 hypothetical protein pdam_00014407 [Pocillopora damicornis]	4e-69	OG0000004	2368	44	NA	NA	NA	NA	NA	NA
HyS0076.11	5.25e-308	3.94729	0.611	0.017	1.16e-303	Gland Cells	15	Zgc	Pancreatic triacylglycerol lipase	NA	carboxylic ester hydrolase activity	lipid metabolic process	extracellular region	SJX71977.1 Pancreatic Triacylglyceride Lipase-like protein 1, partial [Aurelia aurita]	2.8e-115	OG0000247	333	35	NA	NA	NA	NA	NA	NA
HyS0077.56	2.71e-212	0.968895	0.556	0.021	5.96e-208	Gland Cells	15	Zgc	Minor trypsinogen allelic variant	NA	serine-type endopeptidase activity	proteolysis	extracellular space	XP_028403260.1 serine protease 33-like [Dendronephthya gigantea]	1.1e-50	OG0000006	2162	44	NA	NA	NA	NA	NA	NA
HyS0082.11	0	4.49129	0.789	0.019	0	Gland Cells	15	Zgc	Peptidase, S1 (Chymotrypsin) family	NA	serine-type endopeptidase activity	proteolysis	NA	XP_002157230.1 PREDICTED: chymotrypsinogen B-like [Hydra vulgaris]	6.1e-52	OG0023680	3	2	YES	YES	YES	YES	YES	NA
HyS0082.40	0	0.522657	0.5	0.009	0	Gland Cells	15	Zgc	Synaptotagmin-15	SYT15	calcium-dependent phospholipid binding	regulation of dopamine secretion	exocytic vesicle	XP_002157004.2 PREDICTED: synaptotagmin-15-like [Hydra vulgaris]	1.1e-109	OG0000052	896	49	NA	NA	NA	NA	NA	NA
HyS0082.42	0	5.49444	0.744	0.024	0	Gland Cells	15	Zgc	Amiloride-sensitive sodium channel subunit delta	NA	metalloendopeptidase activity	proteolysis	extracellular matrix	XP_012566011.1 PREDICTED: 72 kDa type IV collagenase-like [Hydra vulgaris]	6.6e-57	OG0000099	579	41	NA	NA	NA	NA	NA	NA
HyS0087.43	0	1.6095	0.744	0.002	0	Gland Cells	15	Zgc	Endoglucanase	NA	cellulase activity	cellulose catabolic process	NA	XP_027037391.1 uncharacterized protein LOC113665859 [Pocillopora damicornis]	3.9e-142	OG0001125	114	26	NA	NA	NA	NA	NA	NA
HyS0089.16	0	5.21562	0.933	0.024	0	Gland Cells	15	Zgc	Clip-domain serine protease	NA	serine-type endopeptidase activity	proteolysis	extracellular region	AAO12213.1 serine protease 1, partial [Aurelia aurita]	1.1e-77	OG0000006	2162	44	NA	NA	NA	NA	NA	NA
HyS0089.30	0	4.13867	0.811	0.006	0	Gland Cells	15	Zgc	NA	NA	NA	NA	NA	XP_028396080.1 mucin-5AC-like [Dendronephthya gigantea]	3.2e-08	OG0007671	29	9	YES	NA	NA	NA	NA	NA
HyS0098.60	0	5.46172	0.967	0.019	0	Gland Cells	15	Zgc	Molting fluid carboxypeptidase A	NA	metallocarboxypeptidase activity	proteolysis	extracellular space	CAG08745.1 unnamed protein product, partial [Tetraodon nigroviridis]	1.5e-144	OG0000227	357	43	NA	NA	NA	NA	NA	NA
HyS0181.3	0	3.16422	0.644	0.006	0	Gland Cells	15	Zgc	Subcommissural organ spondin	NA	calcium ion binding	fin morphogenesis	basement membrane	XP_012554220.1 PREDICTED: uncharacterized protein LOC100201520, partial [Hydra vulgaris]	0	OG0001653	88	23	NA	NA	NA	NA	NA	NA
HyS0183.7	0	3.66781	0.578	0.005	0	Gland Cells	15	Zgc	Inositol polyphosphate phosphatase	NA	hydrolase activity, hydrolyzing O-glycosyl compounds	carbohydrate metabolic process	extracellular region	XP_002156254.1 PREDICTED: chitinase 3-like [Hydra vulgaris]	4.2e-167	OG0001753	84	19	NA	NA	NA	NA	NA	NA
HyS0341.3	0	2.6697	0.811	0.005	0	Gland Cells	15	Zgc	NA	NA	NA	NA	NA	XP_027054675.1 uncharacterized protein LOC113681753 [Pocillopora damicornis]	4.5e-61	OG0002667	66	20	NA	NA	NA	NA	NA	NA
HyS0372.5	0	0.590411	0.444	0.001	0	Gland Cells	15	Zgc	Epimerase domain-containing protein	NA	coenzyme binding	NA	NA	XP_012562887.1 PREDICTED: uncharacterized protein LOC105847697 [Hydra vulgaris]	7e-98	OG0005058	49	24	NA	NA	NA	NA	NA	NA
HyS0411.7	0	4.8668	0.533	0.009	0	Gland Cells	15	Zgc	NA	NA	NA	NA	NA	NA	NA	OG0023468	3	2	YES	YES	YES	YES	YES	NA
HyS0439.7	0	0.919308	0.311	0	0	Gland Cells	15	Zgc	Matrix metalloproteinase variant	NA	metalloendopeptidase activity	proteolysis	extracellular matrix	XP_012559039.1 PREDICTED: 50 kDa hatching enzyme-like [Hydra vulgaris]	3.8e-34	OG0000099	579	41	NA	NA	NA	NA	NA	NA
HyS1402.1	0	4.00273	0.811	0.006	0	Gland Cells	15	Zgc	Acidic endochitinase	NA	polysaccharide binding	carbohydrate metabolic process	extracellular region	XP_028393957.1 uncharacterized protein LOC114518207 isoform X1 [Dendronephthya gigantea]	8.7e-120	OG0008217	25	10	NA	NA	NA	NA	NA	NA
HyS2387.1	5.61e-264	4.6996	0.578	0.019	1.24e-259	Gland Cells	15	Zgc	Vacuolar protein sorting-associated protein 41 homolog	NA	phosphoric diester hydrolase activity	intracellular protein transport	HOPS complex	XP_012556574.1 PREDICTED: vacuolar protein sorting-associated protein 41 homolog [Hydra vulgaris]	2.1e-113	OG0003573	57	49	NA	NA	NA	NA	NA	NA
HyS4099.1	7.71e-306	3.33099	0.8	0.032	1.7e-301	Gland Cells	15	Zgc	NA	NA	NA	NA	NA	XP_012556828.1 PREDICTED: uncharacterized protein LOC100203629 [Hydra vulgaris]	2.7e-51	OG0005227	48	39	NA	NA	NA	NA	NA	NA
HyS4737.1	0	0.302214	0.278	0	0	Gland Cells	15	Zgc	NA	NA	NA	NA	NA	XP_012566011.1 PREDICTED: 72 kDa type IV collagenase-like [Hydra vulgaris]	2e-17	OG0000099	579	41	NA	NA	NA	NA	NA	NA
HyS0001.282	0	1.07768	0.371	0.003	0	Nematoblasts	16	nb_3	NA	NA	NA	NA	NA	XP_012566452.1 PREDICTED: putative uncharacterized protein DDB_G0282133 [Hydra vulgaris]	5.6e-12	OG0006992	35	28	NA	NA	NA	NA	NA	NA
HyS0001.358	0	2.16323	0.472	0.001	0	Nematoblasts	16	nb_3	NA	NA	NA	NA	NA	NA	NA	OG0008631	22	4	YES	YES	NA	NA	NA	NA
HyS0001.377	3.86e-266	2.09186	0.449	0.01	8.5e-262	Nematoblasts	16	nb_3	NA	NA	NA	NA	NA	NA	NA	OG0030714	2	2	YES	YES	YES	YES	YES	NA
HyS0001.384	0	2.32881	0.438	0.003	0	Nematoblasts	16	nb_3	NA	NA	NA	NA	NA	XP_012557938.1 PREDICTED: uncharacterized protein LOC105845107 [Hydra vulgaris]	9.2e-100	OG0013078	8	4	YES	YES	YES	NA	NA	NA
HyS0002.118	0	3.62695	0.73	0.005	0	Nematoblasts	16	nb_3	NA	NA	NA	NA	NA	PFX19762.1 hypothetical protein AWC38_SpisGene15796 [Stylophora pistillata]	1.4e-36	OG0007032	35	4	YES	YES	NA	NA	NA	NA
HyS0002.437	0	3.55126	0.753	0.01	0	Nematoblasts	16	nb_3	A disintegrin and metalloproteinase with thrombospondin motifs 12	NA	fucosyltransferase activity	cellular response to xenobiotic stimulus	extracellular region	XP_012557108.1 PREDICTED: uncharacterized protein LOC100206449, partial [Hydra vulgaris]	4.2e-102	OG0014963	6	4	YES	YES	NA	NA	NA	NA
HyS0004.516	0	2.15439	0.584	0.001	0	Nematoblasts	16	nb_3	NA	NA	NA	NA	NA	XP_001631154.1 predicted protein [Nematostella vectensis]	1e-34	OG0006304	41	13	NA	NA	NA	NA	NA	NA
HyS0005.444	0	2.73338	0.596	0.003	0	Nematoblasts	16	nb_3	NA	NA	NA	NA	NA	XP_002164656.1 PREDICTED: uncharacterized protein LOC100198912 [Hydra vulgaris]	1.1e-26	OG0011622	10	10	YES	NA	NA	NA	NA	NA
HyS0006.309	9.21e-265	0.975311	0.404	0.008	2.03e-260	Nematoblasts	16	nb_3	Sex determination protein fox-1 (inferred by orthology to a C. elegans protein)	NA	RNA binding	regulation of RNA splicing	nucleus	XP_002155955.3 PREDICTED: sex determination protein fox-1-like [Hydra vulgaris]	3e-36	OG0002411	69	41	NA	NA	NA	NA	NA	NA
HyS0006.76	0	4.09266	0.933	0.001	0	Nematoblasts	16	nb_3	NA	NA	NA	NA	NA	XP_012553803.1 PREDICTED: uncharacterized protein LOC100204046 [Hydra vulgaris]	6.1e-80	OG0007398	32	4	YES	YES	YES	NA	NA	NA
HyS0008.314	0	2.44229	0.708	0.002	0	Nematoblasts	16	nb_3	NA	NA	NA	NA	NA	NA	NA	OG0010327	14	6	NA	NA	NA	NA	NA	NA
HyS0008.72	4.59e-272	2.7099	0.528	0.014	1.01e-267	Nematoblasts	16	nb_3	NA	NA	NA	NA	NA	XP_002169231.3 PREDICTED: uncharacterized protein LOC100215668 [Hydra vulgaris]	4.8e-121	OG0000200	384	37	NA	NA	NA	NA	NA	NA
HyS0009.299	0	4.94879	0.876	0.01	0	Nematoblasts	16	nb_3	NA	NA	NA	NA	NA	NA	NA	OG0010376	14	3	YES	YES	YES	YES	NA	NA
HyS0010.258	0	1.35059	0.348	0.001	0	Nematoblasts	16	nb_3	cell wall protein DAN4-like	NA	chitin binding	chitin metabolic process	extracellular region	NA	NA	OG0031266	2	2	YES	YES	YES	YES	YES	NA
HyS0010.368	0	1.42363	0.427	0.002	0	Nematoblasts	16	nb_3	Cytoplasmic carbonic anydrase	NA	carbonate dehydratase activity	NA	NA	XP_012554929.1 PREDICTED: uncharacterized protein LOC100212032 [Hydra vulgaris]	8.7e-106	OG0000123	512	46	NA	NA	NA	NA	NA	NA
HyS0010.378	0	2.9802	0.596	0.004	0	Nematoblasts	16	nb_3	NA	NA	NA	NA	NA	NA	NA	Unassigned	NA	NA	NA	NA	NA	NA	NA	NA
HyS0010.40	0	1.28615	0.393	0.001	0	Nematoblasts	16	nb_3	NA	NA	NA	NA	NA	NA	NA	OG0030900	2	2	YES	YES	YES	YES	YES	NA
HyS0010.41	0	1.9601	0.472	0	0	Nematoblasts	16	nb_3	NA	NA	NA	NA	NA	NA	NA	OG0030899	2	2	YES	YES	YES	YES	YES	NA
HyS0011.112	0	1.79094	0.674	0.002	0	Nematoblasts	16	nb_3	CAP domain-containing protein (Fragment)	NA	NA	NA	NA	XP_002157435.3 PREDICTED: uncharacterized protein LOC100204716 [Hydra vulgaris]	4e-126	OG0000074	641	44	NA	NA	NA	NA	NA	NA
HyS0011.307	0	1.94779	0.494	0.001	0	Nematoblasts	16	nb_3	Coiled-coil domain-containing protein 81	NA	NA	keratinization	cornified envelope	XP_004205604.2 PREDICTED: zonadhesin-like [Hydra vulgaris]	1.5e-33	OG0012830	8	8	YES	NA	NA	NA	NA	NA
HyS0012.118	0	4.10118	0.831	0.019	0	Nematoblasts	16	nb_3	Acanthoscurrin-1	NA	unfolded protein binding	antifungal humoral response	extracellular region	XP_028410482.1 uncharacterized protein LOC114533086 isoform X3 [Dendronephthya gigantea]	5.3e-66	OG0009547	17	7	YES	YES	NA	NA	NA	NA
HyS0012.265	0	1.24247	0.449	0	0	Nematoblasts	16	nb_3	Low choriolytic enzyme	NA	metalloendopeptidase activity	proteolysis	membrane	XP_027039324.1 zinc metalloproteinase nas-4-like [Pocillopora damicornis]	8.1e-47	OG0000004	2368	44	NA	NA	NA	NA	NA	NA
HyS0012.57	1.82e-254	3.18747	0.539	0.016	4.02e-250	Nematoblasts	16	nb_3	Collagen alpha-1(XXII) chain	NA	structural constituent of cuticle	regulation of Rho protein signal transduction	collagen trimer	XP_012553610.1 PREDICTED: uncharacterized protein LOC105843173 [Hydra vulgaris]	5.9e-58	OG0010924	12	7	YES	YES	NA	NA	NA	NA
HyS0014.139	0	5.11535	0.978	0.006	0	Nematoblasts	16	nb_3	NA	NA	NA	NA	NA	XP_001636750.1 predicted protein [Nematostella vectensis]	7.3e-14	OG0014095	7	2	YES	YES	YES	YES	YES	NA
HyS0014.325	0	1.3505	0.438	0.001	0	Nematoblasts	16	nb_3	NA	NA	NA	NA	NA	NA	NA	OG0001753	84	19	NA	NA	NA	NA	NA	NA
HyS0016.183	0	3.05446	0.584	0	0	Nematoblasts	16	nb_3	NA	NA	NA	NA	NA	NA	NA	OG0013873	7	3	YES	YES	YES	YES	NA	NA
HyS0017.30	2.11e-223	0.983483	0.652	0.028	4.66e-219	Nematoblasts	16	nb_3	NA	NA	NA	NA	NA	NP_001267748.1 zebra precursor [Hydra vulgaris]	2.8e-30	OG0030902	2	2	YES	YES	YES	YES	YES	NA
HyS0017.323	0	1.81601	0.371	0.001	0	Nematoblasts	16	nb_3	NA	NA	NA	NA	NA	XP_002155200.2 PREDICTED: uncharacterized protein LOC100201425 [Hydra vulgaris]	2.1e-69	OG0007242	33	13	NA	NA	NA	NA	NA	NA
HyS0018.92	0	2.81854	0.551	0.001	0	Nematoblasts	16	nb_3	NA	NA	NA	NA	NA	XP_012556076.1 PREDICTED: uncharacterized protein LOC100198614 [Hydra vulgaris]	4.1e-29	OG0016448	5	3	YES	YES	YES	YES	NA	NA
HyS0019.69	0	2.06712	0.449	0.003	0	Nematoblasts	16	nb_3	NA	NA	NA	NA	NA	NA	NA	OG0030642	2	2	YES	YES	YES	YES	YES	NA
HyS0021.132	0	3.84505	0.494	0	0	Nematoblasts	16	nb_3	Group 3 secretory phospholipase A2	NA	phospholipase A2 activity	arachidonic acid secretion	extracellular region	XP_011641068.1 phospholipase A2-like [Pogonomyrmex barbatus]	6.5e-18	OG0000789	142	31	NA	NA	NA	NA	NA	NA
HyS0022.247	2.65e-290	0.83388	0.36	0.005	5.84e-286	Nematoblasts	16	nb_3	Forkhead box protein biniou (inferred by orthology to a D. melanogaster protein)	NA	sequence-specific DNA binding	regulation of transcription, DNA-templated	nucleus	XP_004207988.1 PREDICTED: forkhead box protein I1c-like [Hydra vulgaris]	9.4e-45	OG0000031	1109	49	NA	NA	NA	NA	NA	NA
HyS0023.305	0	2.93995	0.663	0.002	0	Nematoblasts	16	nb_3	NA	NA	NA	NA	NA	NA	NA	OG0030809	2	2	YES	YES	YES	YES	YES	NA
HyS0023.306	0	4.92079	0.652	0.001	0	Nematoblasts	16	nb_3	NA	NA	NA	NA	NA	XP_002155136.1 PREDICTED: uncharacterized protein LOC100212331 [Hydra vulgaris]	7.2e-06	OG0019660	4	3	YES	YES	YES	NA	NA	NA
HyS0024.36	0	1.89913	0.337	0	0	Nematoblasts	16	nb_3	NA	NA	NA	NA	NA	XP_020907903.1 uncharacterized protein LOC110245945 [Exaiptasia pallida]	1.2e-24	OG0010036	15	8	YES	YES	NA	NA	NA	NA
HyS0025.229	0	1.723	0.371	0.001	0	Nematoblasts	16	nb_3	Zinc metalloproteinase	NA	metalloendopeptidase activity	proteolysis	extracellular region	XP_012567159.1 PREDICTED: zinc metalloproteinase nas-8-like [Hydra vulgaris]	1e-41	OG0023672	3	2	YES	YES	YES	YES	YES	NA
HyS0027.149	0	2.77248	0.708	0.011	0	Nematoblasts	16	nb_3	NA	NA	NA	NA	NA	XP_012559498.1 PREDICTED: probable cyclin-dependent serine/threonine-protein kinase DDB_G0292550 [Hydra vulgaris]	1.8e-91	OG0011698	10	9	YES	NA	NA	NA	NA	NA
HyS0031.145	1.32e-274	2.17261	0.416	0.008	2.92e-270	Nematoblasts	16	nb_3	Triacylglycerol lipase	NA	triglyceride lipase activity	lipid metabolic process	Arp2/3 protein complex	XP_012561586.1 PREDICTED: uncharacterized protein LOC101241114 [Hydra vulgaris]	1.5e-87	OG0000818	139	21	NA	NA	NA	NA	NA	NA
HyS0032.54	0	2.48444	0.506	0.002	0	Nematoblasts	16	nb_3	NA	NA	NA	NA	NA	XP_012564300.1 PREDICTED: uncharacterized protein LOC101238420, partial [Hydra vulgaris]	1.9e-12	OG0012242	9	7	YES	YES	NA	NA	NA	NA
HyS0036.48	0	4.32863	0.663	0.002	0	Nematoblasts	16	nb_3	Metalloendopeptidase	NA	metalloendopeptidase activity	proteolysis	extracellular region	CAJ57449.1 astacin 3 [Hydractinia echinata]	1.5e-86	OG0000004	2368	44	NA	NA	NA	NA	NA	NA
HyS0037.4	4.92e-237	1.63054	0.404	0.009	1.08e-232	Nematoblasts	16	nb_3	Zinc metalloproteinase	NA	metalloendopeptidase activity	proteolysis	extracellular region	XP_012567159.1 PREDICTED: zinc metalloproteinase nas-8-like [Hydra vulgaris]	1.2e-41	OG0023672	3	2	YES	YES	YES	YES	YES	NA
HyS0038.64	0	3.2709	0.719	0.001	0	Nematoblasts	16	nb_3	SCP domain-containing protein	NA	NA	NA	extracellular region	XP_012556221.1 PREDICTED: putative leucine-rich repeat-containing protein DDB_G0290503 isoform X1 [Hydra vulgaris]	7.8e-47	OG0012228	9	7	YES	YES	NA	NA	NA	NA
HyS0039.15	0	2.25658	0.528	0.003	0	Nematoblasts	16	nb_3	Cadmium, zinc and cobalt-transporting ATPase	NA	cadmium transmembrane transporter activity, phosphorylative mechanism	cadmium ion transmembrane transport	cell surface	NA	NA	OG0014967	6	4	YES	YES	YES	NA	NA	NA
HyS0039.78	0	1.55513	0.528	0.001	0	Nematoblasts	16	nb_3	NA	NA	NA	NA	NA	XP_012563330.1 PREDICTED: uncharacterized protein LOC105847989 [Hydra vulgaris]	1e-19	OG0011703	10	8	YES	YES	NA	NA	NA	NA
HyS0044.73	1.22e-259	2.47092	0.697	0.029	2.69e-255	Nematoblasts	16	nb_3	NA	NA	NA	NA	NA	XP_012559205.1 PREDICTED: uncharacterized protein LOC100197306 [Hydra vulgaris]	1.8e-06	OG0031435	2	2	YES	YES	YES	YES	YES	NA
HyS0044.83	0	0.847871	0.36	0.002	0	Nematoblasts	16	nb_3	NA	NA	NA	NA	NA	NA	NA	OG0031436	2	2	YES	YES	YES	YES	YES	NA
HyS0045.130	3.79e-213	0.694117	0.337	0.007	8.35e-209	Nematoblasts	16	nb_3	Proton-coupled folate transporter	SLC46A1	NA	transmembrane transport	integral component of plasma membrane	XP_012556862.1 PREDICTED: proton-coupled folate transporter-like [Hydra vulgaris]	8.3e-173	OG0000217	367	46	NA	NA	NA	NA	NA	NA
HyS0046.136	0	2.1111	0.303	0.001	0	Nematoblasts	16	nb_3	Cytokeratin-10 (Fragment)	NA	nucleic acid binding	NA	nucleus	XP_012561210.1 PREDICTED: allatostatin-A receptor-like [Hydra vulgaris]	1.6e-29	OG0023619	3	2	YES	YES	YES	YES	YES	NA
HyS0046.54	0	4.28191	0.607	0.002	0	Nematoblasts	16	nb_3	NA	NA	NA	NA	NA	XP_012560838.1 PREDICTED: uncharacterized protein LOC100207791 isoform X1 [Hydra vulgaris]	2.7e-24	OG0012856	8	8	YES	YES	NA	NA	NA	NA
HyS0049.125	0	1.95442	0.596	0.001	0	Nematoblasts	16	nb_3	NA	NA	NA	NA	NA	XP_012561329.1 PREDICTED: uncharacterized protein LOC100213201 [Hydra vulgaris]	2.9e-185	OG0001639	89	9	NA	NA	NA	NA	NA	NA
HyS0050.91	0	3.8444	0.82	0.014	0	Nematoblasts	16	nb_3	NA	NA	NA	NA	NA	XP_012564682.1 PREDICTED: uncharacterized protein LOC100210512 [Hydra vulgaris]	1e-74	OG0001639	89	9	NA	NA	NA	NA	NA	NA
HyS0052.121	0	1.89824	0.371	0.001	0	Nematoblasts	16	nb_3	NA	NA	NA	NA	NA	XP_012553455.1 PREDICTED: MATH and LRR domain-containing protein PFE0570w-like [Hydra vulgaris]	8.6e-21	OG0014980	6	4	YES	YES	YES	NA	NA	NA
HyS0052.15	0	1.21329	0.27	0	0	Nematoblasts	16	nb_3	NA	NA	NA	NA	NA	XP_012557231.1 PREDICTED: uncharacterized protein LOC100209705 [Hydra vulgaris]	3.1e-115	OG0011730	10	8	YES	YES	NA	NA	NA	NA
HyS0055.81	0	4.73285	0.685	0.001	0	Nematoblasts	16	nb_3	NA	NA	NA	NA	NA	AFK76348.1 toxin TX1 [Aurelia aurita]	1.9e-28	OG0005258	48	7	YES	YES	NA	NA	NA	NA
HyS0056.41	0	2.28615	0.663	0.007	0	Nematoblasts	16	nb_3	DnaJ like protein subfamily C member 22	NA	NA	NA	integral component of membrane	XP_004210067.1 PREDICTED: dnaJ homolog subfamily C member 22-like [Hydra vulgaris]	1.2e-122	OG0005728	45	41	NA	NA	NA	NA	NA	NA
HyS0057.35	0	4.08948	0.719	0.001	0	Nematoblasts	16	nb_3	Heparanase	NA	hydrolase activity, acting on glycosyl bonds	NA	extracellular matrix	OWF51768.1 Heparanase [Mizuhopecten yessoensis]	2.8e-64	OG0001198	109	37	NA	NA	NA	NA	NA	NA
HyS0057.59	0	3.30384	0.449	0.004	0	Nematoblasts	16	nb_3	NA	NA	NA	NA	NA	NA	NA	OG0031572	2	2	YES	YES	YES	YES	YES	NA
HyS0059.58	0	4.66045	0.798	0.004	0	Nematoblasts	16	nb_3	Putative sphingomyelin phosphodiesterase d	NA	phosphoric diester hydrolase activity	lipid metabolic process	NA	PAA84885.1 hypothetical protein BOX15_Mlig011944g3 [Macrostomum lignano]	2.6e-52	OG0005411	47	11	NA	NA	NA	NA	NA	NA
HyS0064.50	0	1.08334	0.315	0.001	0	Nematoblasts	16	nb_3	NA	NA	NA	NA	NA	PAA77840.1 hypothetical protein BOX15_Mlig032886g2 [Macrostomum lignano]	8.6e-52	OG0005411	47	11	NA	NA	NA	NA	NA	NA
HyS0071.13	0	1.20934	0.348	0	0	Nematoblasts	16	nb_3	NA	NA	NA	NA	NA	NA	NA	OG0031010	2	2	YES	YES	YES	YES	YES	NA
HyS0072.32	0	1.10974	0.337	0	0	Nematoblasts	16	nb_3	NA	NA	NA	NA	NA	AFK76348.1 toxin TX1 [Aurelia aurita]	8.1e-30	OG0005258	48	7	YES	YES	NA	NA	NA	NA
HyS0075.41	0	3.33711	0.82	0.001	0	Nematoblasts	16	nb_3	NA	NA	NA	NA	NA	XP_012553803.1 PREDICTED: uncharacterized protein LOC100204046 [Hydra vulgaris]	7.3e-81	OG0007398	32	4	YES	YES	YES	NA	NA	NA
HyS0076.6	0	1.29917	0.382	0.001	0	Nematoblasts	16	nb_3	NA	NA	NA	NA	NA	XP_012557041.1 PREDICTED: gamma-glutamyl hydrolase-like [Hydra vulgaris]	1.5e-62	OG0000678	160	40	NA	NA	NA	NA	NA	NA
HyS0076.62	0	0.646472	0.27	0	0	Nematoblasts	16	nb_3	NA	NA	NA	NA	NA	NA	NA	OG0030981	2	2	YES	YES	YES	YES	YES	NA
HyS0079.13	0	0.766628	0.337	0	0	Nematoblasts	16	nb_3	NA	NA	NA	NA	NA	XP_012564311.1 PREDICTED: uncharacterized protein LOC105848668, partial [Hydra vulgaris]	5.2e-167	OG0008832	21	4	YES	YES	YES	NA	NA	NA
HyS0089.12	0	1.48319	0.517	0.001	0	Nematoblasts	16	nb_3	NA	NA	NA	NA	NA	XP_012564311.1 PREDICTED: uncharacterized protein LOC105848668, partial [Hydra vulgaris]	3e-150	OG0008832	21	4	YES	YES	YES	NA	NA	NA
HyS0105.11	0	2.23362	0.584	0.001	0	Nematoblasts	16	nb_3	Cadherin EGF LAG seven-pass G-type receptor 1	NA	calcium ion binding	Notch signaling pathway	plasma membrane	XP_012562302.1 PREDICTED: uncharacterized protein LOC101237995, partial [Hydra vulgaris]	4e-76	OG0000023	1217	47	NA	NA	NA	NA	NA	NA
HyS0105.12	0	3.04714	0.674	0.002	0	Nematoblasts	16	nb_3	Delta and Notch epidermal growth	SVEP1	calcium ion binding	cell adhesion	extracellular region	XP_012562302.1 PREDICTED: uncharacterized protein LOC101237995, partial [Hydra vulgaris]	1.8e-94	OG0000023	1217	47	NA	NA	NA	NA	NA	NA
HyS0974.2	0	0.611956	0.258	0	0	Nematoblasts	16	nb_3	NA	NA	NA	NA	NA	XP_012564311.1 PREDICTED: uncharacterized protein LOC105848668, partial [Hydra vulgaris]	6.6e-109	OG0008832	21	4	YES	YES	YES	NA	NA	NA
HyS1173.2	8.36e-234	1.6053	0.719	0.034	1.84e-229	Nematoblasts	16	nb_3	CAP domain-containing protein (Fragment)	NA	nucleic acid binding	NA	NA	XP_002157435.3 PREDICTED: uncharacterized protein LOC100204716 [Hydra vulgaris]	3e-125	OG0006012	43	37	NA	NA	NA	NA	NA	NA
HyS1845.2	0	4.03816	0.584	0.001	0	Nematoblasts	16	nb_3	Group 3 secretory phospholipase A2	PLA2G3	phospholipase A2 activity	arachidonic acid secretion	extracellular region	ELU08437.1 hypothetical protein CAPTEDRAFT_39685, partial [Capitella teleta]	8.4e-18	OG0000789	142	31	NA	NA	NA	NA	NA	NA
HyS2090.1	0	0.811452	0.27	0	0	Nematoblasts	16	nb_3	NA	NA	NA	NA	NA	XP_012557231.1 PREDICTED: uncharacterized protein LOC100209705 [Hydra vulgaris]	1.1e-122	OG0011730	10	8	YES	YES	NA	NA	NA	NA
HyS0001.634	0	1.83259	0.529	0.006	0	Gland Cells	17	Mgc	NA	NA	NA	NA	NA	NA	NA	OG0022169	3	3	YES	YES	YES	YES	NA	NA
HyS0002.339	0	1.72404	0.54	0.005	0	Gland Cells	17	Mgc	NA	NA	NA	NA	NA	XP_020622613.1 protein HOS4-like [Orbicella faveolata]	1.5e-39	OG0002588	66	34	NA	NA	NA	NA	NA	NA
HyS0002.343	0	2.43326	0.345	0.002	0	Gland Cells	17	Mgc	NA	NA	NA	NA	NA	NA	NA	OG0022056	3	3	YES	YES	YES	YES	NA	NA
HyS0002.347	4.32e-299	0.915951	0.391	0.006	9.52e-295	Gland Cells	17	Mgc	NA	NA	NA	NA	NA	WP_072304022.1 hypothetical protein [Cellulophaga fucicola]	1.7e-12	OG0018678	4	3	YES	YES	YES	YES	NA	NA
HyS0002.397	0	3.6561	0.506	0.005	0	Gland Cells	17	Mgc	NA	NA	NA	NA	NA	NA	NA	OG0030761	2	2	YES	YES	YES	YES	YES	NA
HyS0002.59	0	1.03039	0.425	0.003	0	Gland Cells	17	Mgc	NA	NA	NA	NA	NA	XP_012557659.1 PREDICTED: D(1C) dopamine receptor-like [Hydra vulgaris]	6.1e-73	OG0000007	2094	42	NA	NA	NA	NA	NA	NA
HyS0003.219	0	0.93535	0.299	0	0	Gland Cells	17	Mgc	NA	NA	NA	NA	NA	XP_012557215.1 PREDICTED: uncharacterized protein LOC105844769 [Hydra vulgaris]	7.6e-103	OG0002250	72	18	NA	NA	NA	NA	NA	NA
HyS0003.411	0	2.76523	0.506	0.002	0	Gland Cells	17	Mgc	Arabinofuranosidase	NA	alpha-L-arabinofuranosidase activity	L-arabinose metabolic process	NA	XP_012555349.1 PREDICTED: uncharacterized protein LOC100215907 [Hydra vulgaris]	3.7e-14	OG0004712	51	8	NA	NA	NA	NA	NA	NA
HyS0004.446	0	5.27607	0.839	0.008	0	Gland Cells	17	Mgc	Eukaryotic aspartyl protease	NA	chitin binding	chitin metabolic process	extracellular region	XP_004206639.2 PREDICTED: mucin-5AC-like [Hydra vulgaris]	0	OG0000088	604	41	NA	NA	NA	NA	NA	NA
HyS0004.485	0	0.984329	0.345	0.003	0	Gland Cells	17	Mgc	cGMP-dependent protein kinase	EGL-4	cGMP-dependent protein kinase activity	protein phosphorylation	cytosol	AAC23588.1 cyclic GMP-dependent protein kinase [Hydra oligactis]	4.2e-271	OG0001147	112	45	NA	NA	NA	NA	NA	NA
HyS0005.17	0	1.16271	0.391	0.001	0	Gland Cells	17	Mgc	NA	NA	NA	NA	NA	KXJ24696.1 hypothetical protein AC249_AIPGENE20986 [Exaiptasia pallida]	3.1e-06	OG0012533	9	2	NA	NA	NA	NA	NA	NA
HyS0005.449	0	0.815953	0.391	0.003	0	Gland Cells	17	Mgc	NA	NA	NA	NA	NA	NA	NA	OG0018727	4	4	YES	YES	YES	NA	NA	NA
HyS0006.319	0	4.52346	0.621	0.005	0	Gland Cells	17	Mgc	NA	NA	NA	NA	NA	XP_012557038.1 PREDICTED: uncharacterized protein LOC100204023 isoform X2 [Hydra vulgaris]	1.2e-07	OG0016472	5	4	YES	YES	YES	NA	NA	NA
HyS0007.232	0	1.36182	0.437	0.006	0	Gland Cells	17	Mgc	NA	NA	NA	NA	NA	XP_022778558.1 uncharacterized protein LOC111320021 isoform X2 [Stylophora pistillata]	1e-12	OG0009699	16	14	NA	NA	NA	NA	NA	NA
HyS0008.193	0	1.48697	0.575	0.012	0	Gland Cells	17	Mgc	NA	NA	NA	NA	NA	XP_020632008.1 uncharacterized protein C7orf31-like isoform X1 [Orbicella faveolata]	1.5e-52	OG0006340	40	31	NA	NA	NA	NA	NA	NA
HyS0008.239	0	4.88044	0.586	0.007	0	Gland Cells	17	Mgc	NA	NA	NA	NA	NA	NA	NA	OG0031563	2	2	YES	YES	YES	YES	YES	NA
HyS0009.337	0	1.90396	0.655	0.015	0	Gland Cells	17	Mgc	RING-type domain-containing protein (Fragment)	NA	NA	NA	NA	XP_027042554.1 E3 ubiquitin-protein ligase ZNRF3-like [Pocillopora damicornis]	2.2e-36	OG0007639	29	25	NA	NA	NA	NA	NA	NA
HyS0010.141	0	0.900028	0.299	0.002	0	Gland Cells	17	Mgc	NA	NA	NA	NA	NA	XP_020627197.1 uncharacterized protein LOC110064485 [Orbicella faveolata]	4.1e-35	OG0002250	72	18	NA	NA	NA	NA	NA	NA
HyS0010.273	0	2.79037	0.759	0.014	0	Gland Cells	17	Mgc	signal peptide, CUB and EGF-like domain-containing protein 1	NA	calcium ion binding	chitin metabolic process	extracellular region	XP_012557682.1 PREDICTED: SCO-spondin-like [Hydra vulgaris]	6.5e-145	OG0000024	1202	47	NA	NA	NA	NA	NA	NA
HyS0010.394	0	0.844765	0.287	0	0	Gland Cells	17	Mgc	NA	NA	NA	NA	NA	XP_028391361.1 metabotropic glutamate receptor 3-like [Dendronephthya gigantea]	1.3e-41	OG0017024	5	4	NA	NA	NA	NA	NA	NA
HyS0012.188	0	3.48602	0.425	0.002	0	Gland Cells	17	Mgc	Thrombospondin type 1 repeat-containing protein 2	HMCN1	calcium ion binding	endocytosis	integral component of membrane	XP_012557682.1 PREDICTED: SCO-spondin-like [Hydra vulgaris]	0	OG0000024	1202	47	NA	NA	NA	NA	NA	NA
HyS0012.254	4.43e-250	1.72224	0.529	0.015	9.77e-246	Gland Cells	17	Mgc	NA	NA	NA	NA	NA	NA	NA	Unassigned	NA	NA	NA	NA	NA	NA	NA	NA
HyS0012.255	0	1.41257	0.368	0	0	Gland Cells	17	Mgc	NA	NA	NA	NA	NA	XP_002163966.2 PREDICTED: polyenoic fatty acid isomerase-like [Hydra vulgaris]	4.3e-111	OG0007690	29	12	NA	NA	NA	NA	NA	NA
HyS0012.284	0	5.4815	0.747	0.008	0	Gland Cells	17	Mgc	NA	NA	NA	NA	NA	XP_022630517.1 uncharacterized protein LALA0_S11e01200g [Lachancea lanzarotensis]	1.7e-16	OG0000074	641	44	NA	NA	NA	NA	NA	NA
HyS0012.90	0	1.19964	0.31	0.003	0	Gland Cells	17	Mgc	RFX-type winged-helix domain-containing protein (Fragment)	RFX6	DNA-binding transcription factor activity	pancreatic epsilon cell differentiation	nucleolus	XP_019911599.1 PREDICTED: DNA-binding protein RFX6 [Esox lucius]	2.3e-137	OG0000580	177	47	NA	NA	NA	NA	NA	NA
HyS0013.207	0	3.78003	0.908	0.005	0	Gland Cells	17	Mgc	Thrombospondin 1	THBS1	extracellular matrix binding	negative regulation of angiogenesis	extracellular space	XP_002159715.3 PREDICTED: uncharacterized protein LOC100200589 [Hydra vulgaris]	4.7e-115	OG0000639	166	30	NA	NA	NA	NA	NA	NA
HyS0013.217	1.27e-293	1.30475	0.391	0.006	2.79e-289	Gland Cells	17	Mgc	Alpha-1,3-mannosyl-glycoprotein 4-beta-N-acetylglucosaminyltransferase C	NA	transferase activity, transferring glycosyl groups	protein N-linked glycosylation	integral component of membrane	XP_012557493.1 PREDICTED: alpha-1,3-mannosyl-glycoprotein 4-beta-N-acetylglucosaminyltransferase A-like [Hydra vulgaris]	4e-64	OG0000632	168	42	NA	NA	NA	NA	NA	NA
HyS0013.47	0	1.81118	0.471	0.001	0	Gland Cells	17	Mgc	latrophilin Cirl	NA	G protein-coupled receptor activity	cell surface receptor signaling pathway	integral component of membrane	XP_020894367.1 uncharacterized protein LOC110233415 [Exaiptasia pallida]	4.5e-96	OG0000026	1183	45	NA	NA	NA	NA	NA	NA
HyS0013.62	0	7.41249	0.805	0.019	0	Gland Cells	17	Mgc	A disintegrin and metalloproteinase with thrombospondin motifs adt-2	NA	G protein-coupled receptor activity	negative regulation of angiogenesis	integral component of membrane	XP_002162193.3 PREDICTED: uncharacterized protein LOC100212316 [Hydra vulgaris]	1.2e-201	OG0000639	166	30	NA	NA	NA	NA	NA	NA
HyS0014.113	0	2.05833	0.69	0.015	0	Gland Cells	17	Mgc	NA	NA	NA	NA	NA	NP_001299587.1 claudin domain-containing protein 2-like [Hydra vulgaris]	4.4e-31	OG0014962	6	5	YES	YES	NA	NA	NA	NA
HyS0014.142	0	2.80943	0.425	0.003	0	Gland Cells	17	Mgc	NA	NA	NA	NA	NA	NA	NA	OG0031366	2	2	YES	YES	YES	YES	YES	NA
HyS0014.173	0	2.07847	0.736	0.021	0	Gland Cells	17	Mgc	Thrombospondin	THBS4	calcium ion binding	cell adhesion	extracellular region	XP_012565470.1 PREDICTED: uncharacterized protein LOC100210231 [Hydra vulgaris]	0	OG0000532	191	38	NA	NA	NA	NA	NA	NA
HyS0014.342	0	3.43022	0.621	0.003	0	Gland Cells	17	Mgc	NA	NA	NA	NA	NA	XP_020894569.1 uncharacterized protein LOC110233608 isoform X2 [Exaiptasia pallida]	9.1e-05	OG0011220	11	11	YES	NA	NA	NA	NA	NA
HyS0015.116	0	6.44341	0.575	0.012	0	Gland Cells	17	Mgc	Sushi, von Willebrand factor type A, EGF and pentraxin domain-containing protein 1	NA	calcium ion binding	Notch signaling pathway	cell surface	XP_012555237.1 PREDICTED: mucin-2-like isoform X1 [Hydra vulgaris]	0	OG0000088	604	41	NA	NA	NA	NA	NA	NA
HyS0015.84	0	6.56086	0.851	0.015	0	Gland Cells	17	Mgc	Fibrinogen C domain-containing protein 1	NA	receptor tyrosine kinase binding	angiogenesis	collagen-containing extracellular matrix	KXJ06573.1 Fibrinogen C domain-containing protein 1 [Exaiptasia pallida]	3.2e-39	OG0000010	1871	39	NA	NA	NA	NA	NA	NA
HyS0015.85	0	7.57708	0.92	0.03	0	Gland Cells	17	Mgc	Fibrinogen C domain-containing protein 1	NA	chitin binding	complement activation, lectin pathway	collagen trimer	XP_022797000.1 ficolin-1-like [Stylophora pistillata]	1.4e-40	OG0000010	1871	39	NA	NA	NA	NA	NA	NA
HyS0015.86	0	3.53817	0.368	0.003	0	Gland Cells	17	Mgc	Fibrinogen C domain-containing protein 1	NA	receptor tyrosine kinase binding	angiogenesis	collagen trimer	XP_020909468.1 ryncolin-2-like [Exaiptasia pallida]	5e-40	OG0000010	1871	39	NA	NA	NA	NA	NA	NA
HyS0015.87	0	5.05584	0.816	0.006	0	Gland Cells	17	Mgc	Fibrinogen C domain-containing protein 1	TNC	metalloendopeptidase activity	regulation of cell population proliferation	collagen-containing extracellular matrix	KXJ12075.1 Ryncolin-2 [Exaiptasia pallida]	4.3e-36	OG0000010	1871	39	NA	NA	NA	NA	NA	NA
HyS0016.104	0	2.97226	0.586	0.003	0	Gland Cells	17	Mgc	Metalloendopeptidase	NA	metalloendopeptidase activity	proteolysis	plasma membrane	NP_001296695.1 zinc metalloproteinase nas-15-like precursor [Hydra vulgaris]	5.9e-78	OG0000004	2368	44	NA	NA	NA	NA	NA	NA
HyS0016.120	4.3e-290	1.03784	0.425	0.007	9.47e-286	Gland Cells	17	Mgc	NA	NA	NA	NA	NA	NA	NA	OG0027354	2	2	YES	YES	YES	YES	NA	NA
HyS0017.138	3e-235	2.66842	0.253	0.003	6.62e-231	Gland Cells	17	Mgc	LOW QUALITY PROTEIN: fibulin-5	FBLN2	calcium ion binding	extracellular matrix organization	collagen-containing extracellular matrix	XP_027059877.1 signal peptide, CUB and EGF-like domain-containing protein 3 [Pocillopora damicornis]	1.1e-69	OG0001653	88	23	NA	NA	NA	NA	NA	NA
HyS0017.3	4.39e-255	6.27906	0.77	0.037	9.67e-251	Gland Cells	17	Mgc	ADP ribosylation factor guanine nucleotide exchange factor 2	NA	ARF guanyl-nucleotide exchange factor activity	regulation of ARF protein signal transduction	trans-Golgi network	XP_012555760.1 PREDICTED: brefeldin A-inhibited guanine nucleotide-exchange protein 1-like [Hydra vulgaris]	0	OG0001727	85	48	NA	NA	NA	NA	NA	NA
HyS0018.287	0	3.3197	0.517	0.005	0	Gland Cells	17	Mgc	NA	NA	NA	NA	NA	XP_012554752.1 PREDICTED: uncharacterized protein LOC105843661 [Hydra vulgaris]	2.1e-43	OG0000249	333	19	NA	NA	NA	NA	NA	NA
HyS0018.36	4.17e-249	3.05882	0.563	0.018	9.19e-245	Gland Cells	17	Mgc	Sodium- and chloride-dependent taurine transporter	SLC6A6	taurine:sodium symporter activity	neurotransmitter transport	GABA-ergic synapse	QBP15011.1 solute carrier family 6 [Cyanea capillata]	5.6e-226	OG0000047	938	43	NA	NA	NA	NA	NA	NA
HyS0018.81	0	1.53466	0.356	0	0	Gland Cells	17	Mgc	NA	NA	NA	NA	NA	NA	NA	Unassigned	NA	NA	NA	NA	NA	NA	NA	NA
HyS0019.268	0	6.40371	0.632	0.01	0	Gland Cells	17	Mgc	NA	NA	NA	NA	NA	NA	NA	OG0012852	8	4	NA	NA	NA	NA	NA	NA
HyS0019.269	2.79e-243	4.71347	0.333	0.005	6.15e-239	Gland Cells	17	Mgc	NA	NA	NA	NA	NA	NA	NA	OG0012852	8	4	NA	NA	NA	NA	NA	NA
HyS0020.108	0	1.38622	0.506	0.004	0	Gland Cells	17	Mgc	NA	NA	NA	NA	NA	NA	NA	OG0019671	4	3	YES	YES	YES	NA	NA	NA
HyS0020.276	0	1.96239	0.391	0.003	0	Gland Cells	17	Mgc	BHLH domain-containing protein	NA	protein dimerization activity	regulation of transcription by RNA polymerase II	nucleus	XP_004206075.1 PREDICTED: protein atonal homolog 7-A-like [Hydra vulgaris]	8.2e-21	OG0000046	946	42	NA	NA	NA	NA	NA	NA
HyS0021.266	0	6.06128	0.552	0.011	0	Gland Cells	17	Mgc	NA	NA	NA	NA	NA	XP_012554682.1 PREDICTED: uncharacterized protein LOC101235453 [Hydra vulgaris]	1.4e-24	OG0009543	17	8	YES	YES	NA	NA	NA	NA
HyS0021.97	0	5.77554	0.552	0.009	0	Gland Cells	17	Mgc	NA	NA	NA	NA	NA	XP_002154477.1 PREDICTED: uncharacterized protein LOC100214198 [Hydra vulgaris]	8.1e-113	OG0007659	29	16	NA	NA	NA	NA	NA	NA
HyS0023.301	0	3.08839	0.425	0.001	0	Gland Cells	17	Mgc	Gamma-D-glutamyl-L-lysine endopeptidase	NA	cysteine-type peptidase activity	proteolysis	cell wall	XP_015758816.1 PREDICTED: A disintegrin and metalloproteinase with thrombospondin motifs 18-like [Acropora digitifera]	3.1e-20	OG0000249	333	19	NA	NA	NA	NA	NA	NA
HyS0024.213	0	4.93259	0.517	0.004	0	Gland Cells	17	Mgc	NA	NA	NA	NA	NA	NA	NA	OG0031006	2	2	YES	YES	YES	YES	YES	NA
HyS0024.30	0	2.50295	0.724	0.011	0	Gland Cells	17	Mgc	NA	NA	NA	NA	NA	XP_012558160.1 PREDICTED: uncharacterized protein LOC100212375 [Hydra vulgaris]	2.2e-41	OG0000758	147	36	NA	NA	NA	NA	NA	NA
HyS0025.147	0	1.26304	0.46	0.003	0	Gland Cells	17	Mgc	Alpha-1A adrenergic receptor	NA	G protein-coupled receptor activity	G protein-coupled receptor signaling pathway	integral component of membrane	XP_012564972.1 PREDICTED: 5-hydroxytryptamine receptor 2B-like isoform X1 [Hydra vulgaris]	4.6e-72	OG0000007	2094	42	NA	NA	NA	NA	NA	NA
HyS0027.124	0	6.99883	0.793	0.019	0	Gland Cells	17	Mgc	Antistasin	NA	serine-type endopeptidase inhibitor activity	negative regulation of endopeptidase activity	extracellular region	NA	NA	OG0004445	52	17	NA	NA	NA	NA	NA	NA
HyS0027.199	0	2.36831	0.586	0.006	0	Gland Cells	17	Mgc	NA	NA	NA	NA	NA	NA	NA	OG0023443	3	2	YES	YES	YES	YES	YES	NA
HyS0028.127	1.09e-223	0.736351	0.276	0.004	2.41e-219	Gland Cells	17	Mgc	NA	NA	NA	NA	NA	XP_027038681.1 uncharacterized protein LOC113667077 [Pocillopora damicornis]	6e-38	OG0013598	7	7	YES	YES	NA	NA	NA	NA
HyS0028.248	0	0.969068	0.356	0.004	0	Gland Cells	17	Mgc	NA	NA	NA	NA	NA	QBC65507.1 Wnt3 [Dynamena pumila]	3.1e-161	OG0000117	523	42	NA	NA	NA	NA	NA	NA
HyS0032.10	0	2.07892	0.402	0.001	0	Gland Cells	17	Mgc	N-acetyllactosaminide 3-alpha-galactosyltransferase	NA	transferase activity, transferring glycosyl groups	carbohydrate metabolic process	integral component of membrane	XP_004211750.2 PREDICTED: beta-1,4-N-acetylgalactosaminyltransferase bre-4-like [Hydra vulgaris]	9.4e-94	OG0000263	318	47	NA	NA	NA	NA	NA	NA
HyS0032.117	0	3.13078	0.506	0.002	0	Gland Cells	17	Mgc	NA	NA	NA	NA	NA	XP_028399650.1 neurogenic locus notch homolog protein 2-like isoform X3 [Dendronephthya gigantea]	2.6e-14	OG0000352	259	40	NA	NA	NA	NA	NA	NA
HyS0033.213	0	2.58601	0.356	0.003	0	Gland Cells	17	Mgc	NA	NA	NA	NA	NA	NA	NA	OG0030652	2	2	YES	YES	YES	YES	YES	NA
HyS0035.130	0	1.37562	0.471	0.008	0	Gland Cells	17	Mgc	NA	NA	NA	NA	NA	XP_004209877.2 PREDICTED: synaptotagmin-15-like [Hydra vulgaris]	1.5e-93	OG0012824	8	8	YES	YES	NA	NA	NA	NA
HyS0036.119	0	7.28941	0.839	0.031	0	Gland Cells	17	Mgc	NA	NA	NA	NA	NA	XP_015764892.1 PREDICTED: uncharacterized protein LOC107343817 [Acropora digitifera]	1.3e-14	OG0001352	101	13	NA	NA	NA	NA	NA	NA
HyS0036.38	0	4.56784	0.402	0.005	0	Gland Cells	17	Mgc	NA	NA	NA	NA	NA	NA	NA	Unassigned	NA	NA	NA	NA	NA	NA	NA	NA
HyS0038.68	0	5.75386	0.517	0.007	0	Gland Cells	17	Mgc	Thrombospondin-2	NA	calcium ion binding	chitin metabolic process	extracellular region	XP_004205801.1 PREDICTED: coadhesin-like [Hydra vulgaris]	2.9e-115	OG0000249	333	19	NA	NA	NA	NA	NA	NA
HyS0038.87	6.45e-256	0.871915	0.31	0.004	1.42e-251	Gland Cells	17	Mgc	Brachyury transcription factor	NA	DNA-binding transcription factor activity	positive regulation of transcription from RNA polymerase II promoter involved in myocardial precursor cell differentiation	nucleus	AAL26836.1 brachyury T-like protein HeBra [Hydractinia echinata]	7.2e-228	OG0000159	438	46	NA	NA	NA	NA	NA	NA
HyS0040.207	9.83e-243	1.50978	0.494	0.014	2.17e-238	Gland Cells	17	Mgc	NA	NA	NA	NA	NA	KXJ16097.1 hypothetical protein AC249_AIPGENE6266 [Exaiptasia pallida]	3.3e-07	OG0023692	3	2	YES	YES	YES	YES	YES	NA
HyS0042.130	0	5.29373	0.701	0.014	0	Gland Cells	17	Mgc	NA	NA	NA	NA	NA	NA	NA	OG0031600	2	2	YES	YES	YES	YES	YES	NA
HyS0042.42	6.54e-209	1.78438	0.529	0.019	1.44e-204	Gland Cells	17	Mgc	Nanos like protein 1	NANOS1	zinc ion binding	regulation of translation	perinuclear region of cytoplasm	AFV31432.1 Nanos2 [Hydractinia echinata]	8.8e-160	OG0001744	84	41	NA	NA	NA	NA	NA	NA
HyS0043.10	0	5.52765	0.586	0.007	0	Gland Cells	17	Mgc	FKBP-type peptidyl-prolyl cis-trans isomerase	NA	peptidyl-prolyl cis-trans isomerase activity	protein peptidyl-prolyl isomerization	endoplasmic reticulum	XP_002154321.1 PREDICTED: FK506-binding protein 2-like [Hydra vulgaris]	3.7e-66	OG0000235	348	48	NA	NA	NA	NA	NA	NA
HyS0043.34	0	4.23488	0.506	0.009	0	Gland Cells	17	Mgc	NA	NA	NA	NA	NA	NA	NA	OG0008487	23	12	YES	NA	NA	NA	NA	NA
HyS0044.101	6.04e-248	0.91117	0.437	0.01	1.33e-243	Gland Cells	17	Mgc	NA	NA	NA	NA	NA	XP_012557881.1 PREDICTED: probable G-protein coupled receptor 139 isoform X1 [Hydra vulgaris]	2.4e-29	OG0000092	590	29	NA	NA	NA	NA	NA	NA
HyS0045.133	0	4.40253	0.575	0.01	0	Gland Cells	17	Mgc	PLAC domain-containing protein	NA	carbohydrate binding	proteolysis	NA	XP_002168102.3 PREDICTED: A disintegrin and metalloproteinase with thrombospondin motifs 6-like [Hydra vulgaris]	0	OG0000094	589	42	NA	NA	NA	NA	NA	NA
HyS0045.143	0	2.90976	0.529	0.002	0	Gland Cells	17	Mgc	NA	NA	NA	NA	NA	XP_020900102.1 integumentary mucin C.1-like [Exaiptasia pallida]	0.00012	OG0023651	3	2	YES	YES	YES	YES	YES	NA
HyS0047.14	0	3.56362	0.448	0.002	0	Gland Cells	17	Mgc	NA	NA	NA	NA	NA	NA	NA	OG0022074	3	3	YES	YES	YES	YES	NA	NA
HyS0047.5	0	0.878128	0.287	0.001	0	Gland Cells	17	Mgc	NA	NA	NA	NA	NA	XP_023999244.1 neuropeptides B/W receptor type 2-like [Salvelinus alpinus]	2e-17	OG0000966	126	13	NA	NA	NA	NA	NA	NA
HyS0048.52	2.72e-240	0.91819	0.368	0.007	6e-236	Gland Cells	17	Mgc	NA	NA	NA	NA	NA	XP_020631258.1 uncharacterized protein LOC110068219 [Orbicella faveolata]	2e-10	OG0016179	5	4	NA	NA	NA	NA	NA	NA
HyS0049.140	5.77e-279	0.970882	0.31	0.003	1.27e-274	Gland Cells	17	Mgc	NA	NA	NA	NA	NA	XP_021468923.1 tctex1 domain-containing protein 1-like [Oncorhynchus mykiss]	5.3e-12	OG0000205	380	43	NA	NA	NA	NA	NA	NA
HyS0049.94	0	1.73918	0.678	0.001	0	Gland Cells	17	Mgc	NA	NA	NA	NA	NA	NA	NA	OG0011413	11	4	YES	NA	NA	NA	NA	NA
HyS0051.98	0	2.16795	0.552	0.002	0	Gland Cells	17	Mgc	NA	NA	NA	NA	NA	NA	NA	OG0031040	2	2	YES	YES	YES	YES	YES	NA
HyS0052.117	0	2.11096	0.701	0.011	0	Gland Cells	17	Mgc	Atrial natriuretic peptide receptor 1	NA	guanylate cyclase activity	cGMP biosynthetic process	integral component of membrane	XP_020613215.1 atrial natriuretic peptide receptor 1-like isoform X2 [Orbicella faveolata]	3e-202	OG0000029	1125	46	NA	NA	NA	NA	NA	NA
HyS0056.25	1.79e-279	6.13691	0.529	0.014	3.94e-275	Gland Cells	17	Mgc	NA	NA	NA	NA	NA	XP_020894192.1 uncharacterized protein LOC110233262 [Exaiptasia pallida]	5.9e-182	OG0002118	75	16	NA	NA	NA	NA	NA	NA
HyS0057.58	2.03e-240	1.15707	0.494	0.014	4.47e-236	Gland Cells	17	Mgc	NA	NA	NA	NA	NA	XP_004209887.1 PREDICTED: synaptotagmin-10-like [Hydra vulgaris]	1.9e-51	OG0009935	15	13	YES	NA	NA	NA	NA	NA
HyS0058.44	0	2.83519	0.736	0.016	0	Gland Cells	17	Mgc	Flagellar attachment zone protein 1	NA	chitin binding	chitin metabolic process	extracellular region	KXJ17291.1 Myosin-2 heavy chain [Exaiptasia pallida]	0	OG0000617	170	31	NA	NA	NA	NA	NA	NA
HyS0059.70	0	2.79187	0.678	0.009	0	Gland Cells	17	Mgc	NA	NA	NA	NA	NA	XP_012565272.1 PREDICTED: uncharacterized protein LOC105849445 [Hydra vulgaris]	1.3e-18	OG0008283	24	20	NA	NA	NA	NA	NA	NA
HyS0063.27	0	4.99103	0.747	0.006	0	Gland Cells	17	Mgc	NA	NA	NA	NA	NA	NA	NA	OG0031245	2	2	YES	YES	YES	YES	YES	NA
HyS0063.28	0	2.44285	0.345	0.001	0	Gland Cells	17	Mgc	NA	NA	NA	NA	NA	NA	NA	OG0031624	2	2	YES	YES	YES	YES	YES	NA
HyS0065.44	0	1.51947	0.425	0	0	Gland Cells	17	Mgc	NA	NA	NA	NA	NA	XP_012563922.1 PREDICTED: uncharacterized protein LOC105848383 [Hydra vulgaris]	3.9e-48	OG0000513	196	15	YES	NA	NA	NA	NA	NA
HyS0065.64	6.76e-221	0.83871	0.322	0.006	1.49e-216	Gland Cells	17	Mgc	Galactosylceramide sulfotransferase	NA	galactosylceramide sulfotransferase activity	glycolipid biosynthetic process	Golgi apparatus	XP_004212526.2 PREDICTED: galactose-3-O-sulfotransferase 4-like [Hydra vulgaris]	1.1e-67	OG0000143	471	36	NA	NA	NA	NA	NA	NA
HyS0068.31	0	3.77169	0.402	0.002	0	Gland Cells	17	Mgc	Hepatocyte growth factor activator	NA	serine-type endopeptidase activity	proteolysis	extracellular region	XP_012562027.1 PREDICTED: trypsin-like [Hydra vulgaris]	8e-77	OG0000006	2162	44	NA	NA	NA	NA	NA	NA
HyS0075.49	0	1.33604	0.31	0.001	0	Gland Cells	17	Mgc	NA	NA	NA	NA	NA	XP_020900102.1 integumentary mucin C.1-like [Exaiptasia pallida]	0.00012	OG0023651	3	2	YES	YES	YES	YES	YES	NA
HyS0076.56	0	3.85739	0.253	0.001	0	Gland Cells	17	Mgc	D-alanyl-D-alanine carboxypeptidase	NA	peptidase activity	proteolysis	extracellular matrix	XP_020608880.1 uncharacterized protein LOC110047468, partial [Orbicella faveolata]	6e-11	OG0019723	4	2	YES	YES	YES	YES	YES	NA
HyS0076.57	0	4.07189	0.253	0.001	0	Gland Cells	17	Mgc	D-alanyl-D-alanine carboxypeptidase	NA	peptidase activity	proteolysis	extracellular matrix	KXJ05233.1 hypothetical protein AC249_AIPGENE24995, partial [Exaiptasia pallida]	3.8e-22	OG0019723	4	2	YES	YES	YES	YES	YES	NA
HyS0085.38	0	3.52691	0.506	0.002	0	Gland Cells	17	Mgc	NA	NA	NA	NA	NA	NA	NA	OG0031096	2	2	YES	YES	YES	YES	YES	NA
HyS0094.28	1.8e-239	0.863912	0.322	0.005	3.97e-235	Gland Cells	17	Mgc	Innexin	NA	NA	ion transport	gap junction	XP_012554059.1 PREDICTED: uncharacterized protein LOC100202445 [Hydra vulgaris]	2e-140	OG0001165	112	6	NA	NA	NA	NA	NA	NA
HyS0096.14	1.23e-257	0.856702	0.322	0.004	2.71e-253	Gland Cells	17	Mgc	DENN domain-containing protein 5A	NA	GTPase activity	signal transduction	plasma membrane	XP_012556957.1 PREDICTED: GTP-binding protein Di-Ras2-like [Hydra vulgaris]	5.2e-37	OG0001052	119	40	NA	NA	NA	NA	NA	NA
HyS0118.19	0	5.4544	0.54	0.008	0	Gland Cells	17	Mgc	NA	NA	NA	NA	NA	NA	NA	OG0023325	3	3	YES	YES	YES	NA	NA	NA
HyS0119.13	6.79e-275	1.5698	0.494	0.012	1.5e-270	Gland Cells	17	Mgc	Ephrin type-A receptor 4	EPHA7	ephrin receptor activity	ephrin receptor signaling pathway	integral component of plasma membrane	NP_001296657.1 ephrin type-A receptor 3-like precursor [Hydra vulgaris]	1.9e-279	OG0000266	316	44	NA	NA	NA	NA	NA	NA
HyS0121.5	8.57e-289	0.841801	0.299	0.003	1.89e-284	Gland Cells	17	Mgc	NA	NA	NA	NA	NA	XP_012555770.1 PREDICTED: metabotropic glutamate receptor 3-like [Hydra vulgaris]	2.3e-206	OG0000033	1070	45	NA	NA	NA	NA	NA	NA
HyS0132.10	0	0.953864	0.333	0.001	0	Gland Cells	17	Mgc	Homeobox domain-containing protein (Fragment)	NA	sequence-specific DNA binding	regulation of transcription, DNA-templated	nucleus	CAA72534.1 Cn-ems protein [Hydractinia symbiolongicarpus]	7.3e-140	OG0000008	2065	44	NA	NA	NA	NA	NA	NA
HyS0280.7	2.49e-226	0.986116	0.368	0.007	5.48e-222	Gland Cells	17	Mgc	NA	NA	NA	NA	NA	XP_012558112.1 PREDICTED: bromodomain-containing protein DDB_G0270170-like [Hydra vulgaris]	8.4e-40	OG0002144	74	35	NA	NA	NA	NA	NA	NA
HyS0675.2	2.33e-284	1.23965	0.471	0.01	5.12e-280	Gland Cells	17	Mgc	NA	NA	NA	NA	NA	WP_027077997.1 hypothetical protein [Maribacter antarcticus]	1.3e-12	OG0018678	4	3	YES	YES	YES	YES	NA	NA

## Sheet: Legend
Table S30. Cluster marker genes from the Seurat single-cell RNAseq analysis of H. symbiolongicarpus. Positive markers for all clusters were identified using the Seurat function FindAllMarkers using min.pct=0.25 and default parameters otherwise. The list was further filtered, keeping markers that had a pct1 > 0.25, a pct2 < 0.05, and an adjusted p-value cutoff of 10-200. All duplicated markers (ma…
