# Supplementary material for: The genome of the colonial hydroid Hydractinia reveals that their stem cells use a toolkit of evolutionarily shared genes with all animals
Source: Genome Res. 2024 Mar;34(3):498–513. doi: 10.1101/gr.278382.123 (PMC11067881; doi:10.1101/gr.278382.123)
Supplement: Supplement 8 [file Supplemental_Table_S31.xlsx]

## Sheet: Primers for ISH
Gene	Primer name	Primer Sequence (5'-3')	primer length	Expected Product Size from pair
Piwi1	Piwi1_F	ACCAAACAACAGAGGGCACA	20	1031
Piwi1	Piwi1_R	AGCCATGTTCCATTGAGCCA	20	1031
PCNA	PCNA_F	AGGCAAAACTTGAAGATGGCAC	22	800
PCNA	PCNA_R	ATCACCCCCTTGTTCCATGTC	21	800
Ncol1	Ncol1_F1	GCTAACGCCAAAACTTTACACG	22	398
Ncol1	Ncol1_R1	GGGCAACAGTATTGTGGACAAGA	23	398
SLC9A10	SLC9A10_For2	AGAGAACATCCTGGCATTGC	20	1030
SLC9A10	SLC9A10_Rev2	AACCAGCTGAGCGATGACTT	20	1030
NematocillinA	NematocillinA_For1	GGAAGTCGAACGGCAACAAG	20	960
NematocillinA	NematocillinA_Rev1	CGAATCGTGTGTGGTCGAGT	20	960
ARSTNd2-like	ARSTN2_For1	GCTTGCATGCCTGTTGGTAC	20	1789
ARSTNd2-like	ARSTN2_Rev1	CGTCCACGGTAGCATGATCA	20	1789
Chitinase1	Chit1a F	ACAACTGCAATCTTCCTGACCT	22	989
Chitinase1	Chit1a R	TGACCTTTGTAACCGTACGGAG	22	989

## Sheet: Legend
Table S31. Primer sequences used for cloning genes for creating riboprobes for in situ hybridization in H. symbiolongicarpus.
